# Supplementary material for: Deactivation of Ti and Zr half-metallocene complexes activated with B(C6F5)3: a case study in constructing DFT-based QSARs to predict unimolecular rate constants
Source: Royal Society of Chemistry journal article supplement (doi:10.1039/c5ra00546a), 2015-01-01
Supplement: c5ra00546a1.pdf [file c5ra00546a1.pdf]

## Electronic Supplementary Information

### Deactivation of Ti and Zr Half-Metallocene Complexes Activated with B(C<sub>6</sub>F<sub>5</sub>)<sub>3</sub>: A Case Study in Constructing DFT-Based QSARs to Predict Unimolecular Rate Constants

Thomas A. Manz<sup>a,b,c\*</sup>

<sup>a</sup>Department of Chemical & Materials Engineering, New Mexico State University, Las Cruces, NM 88003-8001. <sup>b</sup>School of Chemical Engineering, Purdue University, West Lafayette, IN 47907-2100. <sup>c</sup>School of Chemical & Biomolecular Engineering, Georgia Institute of Technology, Atlanta, GA 30332-0100.

\*address correspondence to: [tmanz@nmsu.edu](mailto:tmanz@nmsu.edu)

#### CONTENTS

1. [List of Catalyst Structures and Summary Tables](#)
2. [Computational Methods](#)
3. [Methyl Ion Pairs](#)
4. [Transition States for Transfer of H from Counterion to Cation](#)
5. [Transition States for Transfer of \(C<sub>6</sub>F<sub>5</sub>\) from Counterion to Cation](#)
6. [Product for Transfer of H from Counterion to Cation](#)
7. [Product for Transfer of \(C<sub>6</sub>F<sub>5</sub>\) from Counterion to Cation](#)
8. [Additional Geometries](#)

The total SCF energies (in Hartrees) reported here can only be compared to total SCF energies computed using Gaussian software with the same exchange-correlation functional, basis sets, grids, and solvation model (where applicable). On the other hand, it is possible to compare relative energy differences (such as barrier heights, heats of reaction, solvation energies, etc.) for different computational methods.

DFT-optimized geometries are reported as XYZ coordinates in angstroms. The methyl ion pair and bare cation geometries for catalysts **1a-18a** were reported in the Supporting Information of T.A. Manz, S. Sharma, K. Phomphrai, K.A. Novstrup, A.E. Fenwick, P.E. Fanwick, G.A. Medvedev, M.M. Abu-Omar, W.N. Delgass, K.T. Thomson, and J.M. Caruthers, "Quantitative Effects of Ion Pairing and Sterics on Chain Propagation Kinetics for 1-Hexene Polymerization Catalyzed by Mixed Cp'/ArO Complexes," *Organometallics* **27** (2008) 5504-5520.

The computational tolerance for frequencies was approximately 30 cm<sup>-1</sup>. Consequently, some ground states have imaginary frequencies with magnitudes less than or equal to approximately 30 cm<sup>-1</sup>. These small magnitude frequencies are not significant and should be ignored.

1. List of Catalyst Structures and Summary Tables  
[\(return to table of contents\)](#)

Table S1: List of catalyst structures

| Catalyst | m  | Ligand<br>1 | Ligand 2 Aryloxy Substituents |     |                 |    |                 |
|----------|----|-------------|-------------------------------|-----|-----------------|----|-----------------|
|          |    |             | R2                            | R3  | R4              | R5 | R6              |
| 1        | Ti | Cp          | Me                            | H   | Br              | H  | Me              |
| 2        | Ti | Cp          | Et                            | H   | H               | H  | Et              |
| 3        | Ti | Cp          | <sup>i</sup> Pr               | H   | H               | H  | <sup>i</sup> Pr |
| 4        | Ti | Cp          | H                             | H   | H               | H  | H               |
| 5        | Ti | Cp*         | H                             | H   | F               | H  | H               |
| 6        | Ti | Cp*         | H                             | H   | Cl              | H  | H               |
| 7        | Ti | Cp*         | H                             | H   | Br              | H  | H               |
| 8        | Ti | Cp*         | H                             | H   | Ph              | H  | H               |
| 9        | Ti | Cp*         | H                             | H   | <sup>t</sup> Bu | H  | H               |
| 10       | Ti | Cp*         | Me                            | H   | H               | H  | Me              |
| 11       | Ti | Cp*         | Et                            | H   | H               | H  | Et              |
| 12       | Ti | Cp*         | <sup>i</sup> Pr               | H   | H               | H  | <sup>i</sup> Pr |
| 13       | Ti | Cp*         | Cyclo-<br>hexyl<br>(chair)    | H   | H               | H  | H               |
| 14       | Ti | Cp*         | Me                            | H   | Br              | H  | Me              |
| 15       | Ti | Cp*         | CH <sub>2</sub> Ph            | H   | H               | H  | H               |
| 16       | Ti | Cp*         | Ph                            | Ph  | H               | Ph | Ph              |
| 17       | Ti | Cp*         | H                             | OMe | H               | H  | H               |
| 18       | Ti | Cp*         | H                             | H   | OMe             | H  | H               |
| 19       | Ti | Cp          | Ph                            | Ph  | H               | Ph | Ph              |
| 20       | Ti | Cp*         | Br                            | H   | H               | H  | H               |
| 21       | Ti | Cp*         | Ph                            | H   | H               | H  | H               |
| 22       | Ti | Ind         | Ph                            | Ph  | H               | Ph | Ph              |
| 23       | Ti | Ind         | <sup>i</sup> Pr               | H   | H               | H  | <sup>i</sup> Pr |
| 24       | Zr | Cp*         | Ph                            | Ph  | H               | Ph | Ph              |
| 30       | Ti | Cp*         | OMe                           | H   | H               | H  | OMe             |
| 31       | Ti | Cp*         | <sup>i</sup> Pr               | H   | Br              | H  | <sup>i</sup> Pr |
| 33       | Ti | Cp          | Me                            | H   | H               | H  | Me              |

Cp = C<sub>5</sub>H<sub>5</sub>; Cp\* = C<sub>5</sub>Me<sub>5</sub>; Ind = C<sub>5</sub>H<sub>3</sub>C<sub>6</sub>H<sub>4</sub>

**Table S2: Computed barrier heights and reaction energies in toluene solvent (SCF energies without zero-point and thermal vibrational corrections and without dispersion corrections)**

| cat. # | $\Theta_{\text{Cp}^{\cdot}}$ (°) | $\Theta_{\text{OAr}}$ (°) | H transfer (in kcal/mol) |                       |                          | C <sub>6</sub> F <sub>5</sub> transfer (in kcal/mol) |                       |                          |
|--------|----------------------------------|---------------------------|--------------------------|-----------------------|--------------------------|------------------------------------------------------|-----------------------|--------------------------|
|        |                                  |                           | $\Delta V_0$ toluene     | $E_{\text{rxn}}$ vac. | $E_{\text{rxn}}$ toluene | $\Delta V_0$ toluene                                 | $E_{\text{rxn}}$ vac. | $E_{\text{rxn}}$ toluene |
| 1      | 128                              | 129                       | 28.4                     | -3.5                  | -3.2                     | 34.7                                                 | -8.6                  | -8.5                     |
| 2      | 129                              | 132                       | 28.8                     | -4.0                  | -3.8                     | 34.9                                                 | -9.9                  | -9.8                     |
| 3      | 130                              | 136                       | 27.7                     | -5.1                  | -5.2                     | 35.4                                                 | -10.5                 | -10.6                    |
| 4      | 155                              | 96                        | 30.9                     | -5.5                  | -6.0                     | 38.3                                                 | -9.2                  | -9.3                     |
| 5      | 156                              | 96                        | 35.9                     | -5.6                  | -5.4                     | 38.8                                                 | -10.1                 | -9.5                     |
| 6      | 156                              | 96                        | 31.3                     | -5.6                  | -5.7                     | 38.7                                                 | -10.3                 | -9.9                     |
| 7      | 156                              | 96                        | 30.3                     | -5.6                  | -5.8                     | 38.4                                                 | -10.2                 | -10.0                    |
| 8      | 156                              | 96                        | 31.0                     | -5.4                  | -5.6                     | 38.6                                                 | -9.1                  | -9.0                     |
| 9      | 156                              | 96                        | 31.9                     | -5.5                  | -5.5                     | 38.5                                                 | -8.4                  | -8.2                     |
| 10     | 154                              | 127                       | 29.1                     | -3.4                  | -3.4                     | 42.1                                                 | -4.8                  | -4.7                     |
| 11     | 155                              | 132                       | 30.9                     | -3.4                  | -3.7                     | 42.4                                                 | -3.8                  | -4.3                     |
| 12     | 154                              | 136                       | 29.0                     | -5.2                  | -0.9                     | 44.8                                                 | -5.1                  | -5.1                     |
| 13d    | 155                              | 125                       | 29.3                     | -3.0                  | -2.9                     | 41.8                                                 | -7.5                  | -7.4                     |
| 13p    | 156                              | 127                       | 31.0                     | -2.9                  | -2.7                     | 42.4                                                 | -7.2                  | -7.1                     |
| 14     | 155                              | 127                       | 28.9                     | -3.8                  | -3.8                     | 42.0                                                 | -1.6                  | -1.6                     |
| 15d    | 155                              | 113                       | 29.4                     | -3.5                  | -3.3                     | 41.5                                                 | -8.0                  | -8.3                     |
| 15p    | 156                              | 111                       | 31.1                     | -3.6                  | -3.2                     | 40.8                                                 | -7.3                  | -7.4                     |
| 16     | 154                              | 163                       | 27.0                     | -7.3                  | -7.0                     | 41.0                                                 | -2.7                  | -3.6                     |
| 17d    | 156                              | 96                        | 30.0                     | -5.8                  | -6.2                     | 38.5                                                 | -8.7                  | -8.9                     |
| 17p    | 155                              | 96                        | 30.5                     | -5.7                  | -5.3                     | 39.2                                                 | -8.7                  | -8.4                     |
| 18     | 156                              | 96                        | 31.2                     | -5.4                  | -5.1                     | 39.1                                                 | -8.4                  | -8.1                     |
| 19     | 130                              | 167                       | 26.9                     | -4.6                  | -4.5                     | 39.7                                                 | -9.1                  | -9.4                     |
| 20d    | 154                              | 118                       | 29.8                     | -2.7                  | -2.4                     | 41.8                                                 | -7.1                  | -6.9                     |
| 20p    | 155                              | 117                       | 29.5                     | -5.5                  | -5.4                     | 40.4                                                 | -9.1                  | -8.7                     |
| 21d    | 154                              | 127                       | n.a.                     | -3.5                  | -3.4                     | 42.2                                                 | -6.2                  | -6.5                     |
| 21p    | 154                              | 128                       | 29.5                     | -4.2                  | -3.9                     | 41.7                                                 | -6.8                  | -6.9                     |
| 22     | 136                              | 169                       | 32.1                     | -5.2                  | -4.9                     | 41.2                                                 | -8.9                  | -9.5                     |
| 23     | 136                              | 138                       | 28.8                     | -5.8                  | -5.6                     | 37.4                                                 | -10.7                 | -10.7                    |
| 24     | 149                              | 155                       | 28.4                     | -3.0                  | -4.6                     | 43.7                                                 | -4.5                  | -6.9                     |
| 30     | 155                              | 135                       | 29.3                     | -6.9                  | -7.0                     | 42.6                                                 | -2.5                  | -2.7                     |
| 31     | 154                              | 135                       | 29.0                     | -5.2                  | -4.6                     | 45.7                                                 | -5.9                  | -5.9                     |
| 33     | 128                              | 129                       | 29.9                     | -3.9                  | -3.4                     | 35.4                                                 | -7.8                  | -7.2                     |

d = ortho aryloxy substituent distal to chain, p = ortho aryloxy substituent proximal to chain

## 2. Computational Methods

[\(return to table of contents\)](#)

All DFT computations were performed in the Gaussian 03 software program. The reported SCF energies are those obtained using the OLYP exchange-correlation functional and LANL2DZ basis sets on all atoms. Auto electron density fitting basis sets were used by specifying olyp/lanl2dz/auto in the Gaussian 03 route line. The SCF energies in solution were generated using the PCM model as described below. SCF energies were usually converged to  $10^{-8}$  Hartree or better. In all cases, the default set of DFT grids was used. (“The default grid is a pruned (75,302) grid, having 75 radial shells and 302 angular points per shell, resulting in about 7000 points per atom.”<sup>1</sup>) Fermi damping was used to improve SCF convergence performance by specifying scf=(fermi, tight, maxcycle=400) or similar. If this failed, the SCF algorithm was modified to scf=(SSD, maxcycle=400, conver=6), scf=(maxcycle=400,conver=6), or similar.

Except where otherwise specified, all geometries were optimized in vacuum to better than 0.005 Å on atom displacements and 0.0025 AU on forces. Ground state geometries were optimized using the GDIIS method. Transition state geometries were optimized using the QST3 (quadratic synchronous transit) or TS method. The initial transition state guess was obtained by performing a series of constrained geometry optimizations or by modifying ligand substituents on a converged transition state geometry for a similar catalyst. Using this initial guess, the transition state was found using the QST3 or TS method with estimated Hessians. Using this transition state as input, the final transition state geometry was obtained using the QST3 or TS method with either (a) CALCALL or (b) CALCFC and FREQ. Analytic frequency analysis was performed to verify transition states, and the imaginary frequency corresponding to the reaction coordinate is given for each of the optimized transition states.

Once the geometries were converged in vacuum, the following parameters (Gaussian 03 defaults for the PCM model) were used to perform the solvation energy calculations in an implicit toluene-like solvent:

```

Model                : PCM.
Atomic radii         : UA0 (Simple United Atom Topological Model).
Polarization charges : Total charges.
Charge compensation  : None.
Solution method      : Matrix inversion.
Cavity               : GePol (RMin= .200 OFac= .890).
                    : Default sphere list used.
                    : Tesserae with average area of .200 Ang**2.
Solvent              : Toluene, Eps      = 2.379000
                    : Eps(inf)= 2.232000
                    : RSolv  = 2.820000 Ang.

```

These parameters were chosen by specifying scrf=(pcm,solvent=toluene) in the route line. In the case of bromobenzene-like and 1,2-dichlorobenzene-like solvents, the parameters had to be specified manually. This was done by using scrf=(pcm,read) together with the following PCM keywords:

```

(a) for bromobenzene
EPS = 5.40
EPSINF = 5.40
RSolv=2.82

```

DENSITY=0.00539

(b) for 1,2-dichlorobenzene

EPS=9.93

EPSINF=9.93

RSolv=2.82

DENSITY=0.00534

The above parameter set assumes the solvent radius is approximately the same for toluene, bromobenzene, and 1,2-dichlorobenzene. (A reasonable assumption due to the similar sizes and shapes of these molecules.)

The program alerted the user when one or more hydrogen atoms was not bonded to a single heavy atom. In such cases, an individual sphere was placed around that particular hydrogen atom rather than grouping it with a heavier atom. This was done by specifying `sphereonh=X` where X was the number of the hydrogen atom.

Where the program had difficulty with PCM convergence and returned the error “Inv2 failed in DMIVCL”, the following values were specified: `Rmin=0.5` and `OFac=0.8`. (The change in energy associated with this change in parameters is small enough to be neglected.) This suggestion was provided by Gaussian technical support.

#### Gaussian 03 Reference:

<sup>1</sup> Frisch, M. J.; Trucks, G. W.; Schlegel, H. B.; Scuseria, G. E.; Robb, M. A.; Cheeseman, J. R.; Montgomery, J.; Vreven, T.; Kudin, K. N.; Burant, J. C.; Millam, J. M.; Iyengar, S. S.; Tomasi, J.; Barone, V.; Mennucci, B.; Cossi, M.; Scalmani, G.; Rega, N.; Petersson, G. A.; Nakatsuji, H.; Hada, M.; Ehara, M.; Toyota, K.; Fukuda, R.; Hasegawa, J.; Ishida, M.; Nakajima, T.; Honda, Y.; Kitao, O.; Nakai, H.; Klene, M.; Li, X.; Knox, J. E.; Hratchian, H. P.; Cross, J. B.; Adamo, C.; Jaramillo, J.; Gomperts, R.; Stratmann, R. E.; Yazyev, O.; Austin, A. J.; Cammi, R.; Pomelli, C.; Ochterski, J. W.; Ayala, P. Y.; Morokuma, K.; Voth, G. A.; Salvador, P.; J. J. Dannenberg; Zakrzewski, V. G.; Dapprich, S.; Daniels, A. D.; Strain, M. C.; Farkas, O.; Malick, D. K.; Rabuck, A. D.; Raghavachari, K.; Foresman, J. B.; Ortiz, J. V.; Cui, Q.; Baboul, A. G.; Clifford, S.; Cioslowski, J.; Stefanov, B. B.; Liu, G.; Liashenko, A.; Piskorz, P.; Komaromi, I.; Martin, R. L.; Fox, D. J.; Keith, T.; Al-Laham, M. A.; Peng, C. Y.; Nanayakkara, A.; Challacombe, M.; Gill, P. M. W.; Johnson, B.; Chen, W.; Wong, M. W.; Gonzalez, C.; Pople, J. A.; Gaussian 03; Gaussian, Inc.: Pittsburgh PA, 2003.

### 3. Methyl Ion Pairs ([return to table of contents](#))

Geometries and energies of the methyl ion pairs for catalysts **1-18** were reported in T.A. Manz, S. Sharma, K. Phomphrai, K. A. Novstrup, A. E. Fenwick, P. E. Fanwick, G. A. Medvedev, M. M. Abu-Omar, W. N. Delgass, K. T. Thomson, and J. M. Caruthers, *Organometallics*, 27 (2008) 5504-5520.

#### Catalyst 1:

| vacuum         | toluene-like solvent | D3 dispersion |
|----------------|----------------------|---------------|
| -2937.07916345 | -2937.091722         | -0.49768288   |

|                |           |           |           |
|----------------|-----------|-----------|-----------|
| Frequencies -- | -2.6382   | 8.0348    | 10.9429   |
| Frequencies -- | 15.9487   | 19.3573   | 24.0573   |
| Frequencies -- | 27.2232   | 30.9377   | 32.6093   |
| Frequencies -- | 34.9954   | 41.7533   | 44.4095   |
| Frequencies -- | 49.8131   | 71.2756   | 75.2276   |
| Frequencies -- | 95.2457   | 101.4752  | 107.0002  |
| Frequencies -- | 107.7845  | 115.7530  | 118.6533  |
| Frequencies -- | 119.7685  | 125.4493  | 130.7109  |
| Frequencies -- | 141.1742  | 149.3343  | 152.4272  |
| Frequencies -- | 152.8542  | 153.2844  | 157.3586  |
| Frequencies -- | 161.0517  | 161.8299  | 167.2024  |
| Frequencies -- | 184.2984  | 194.7208  | 212.6272  |
| Frequencies -- | 218.4472  | 219.0625  | 220.1642  |
| Frequencies -- | 224.6661  | 235.3721  | 238.0064  |
| Frequencies -- | 246.4970  | 249.4542  | 261.7954  |
| Frequencies -- | 264.7743  | 264.8535  | 265.8323  |
| Frequencies -- | 269.9944  | 272.6848  | 273.3692  |
| Frequencies -- | 282.1208  | 290.5344  | 292.8589  |
| Frequencies -- | 308.9396  | 317.6773  | 320.6967  |
| Frequencies -- | 333.3003  | 336.9078  | 337.8158  |
| Frequencies -- | 347.8541  | 357.5292  | 362.5031  |
| Frequencies -- | 379.3782  | 380.1840  | 380.3239  |
| Frequencies -- | 389.0646  | 391.2395  | 401.8081  |
| Frequencies -- | 431.9069  | 431.9695  | 432.4087  |
| Frequencies -- | 433.3223  | 456.9793  | 457.4179  |
| Frequencies -- | 459.6730  | 479.2288  | 501.6076  |
| Frequencies -- | 509.5751  | 513.5717  | 541.1497  |
| Frequencies -- | 541.8482  | 547.6642  | 560.4526  |
| Frequencies -- | 563.4916  | 569.1415  | 569.6773  |
| Frequencies -- | 573.5720  | 595.3040  | 596.8225  |
| Frequencies -- | 599.9694  | 632.0503  | 639.1978  |
| Frequencies -- | 639.7316  | 642.7692  | 661.7248  |
| Frequencies -- | 663.1851  | 682.2074  | 692.8898  |
| Frequencies -- | 728.6853  | 730.4308  | 730.6695  |
| Frequencies -- | 741.9752  | 759.5357  | 760.3606  |
| Frequencies -- | 771.0042  | 790.7380  | 801.5757  |
| Frequencies -- | 806.5409  | 815.7092  | 831.2055  |
| Frequencies -- | 840.4983  | 840.7659  | 867.3843  |
| Frequencies -- | 869.6145  | 871.3868  | 887.0620  |
| Frequencies -- | 891.0419  | 895.2405  | 906.0748  |
| Frequencies -- | 909.5396  | 912.6339  | 933.2209  |
| Frequencies -- | 950.5509  | 1011.9560 | 1021.1087 |
| Frequencies -- | 1022.9101 | 1026.3621 | 1028.3037 |
| Frequencies -- | 1034.6698 | 1048.4716 | 1050.3873 |
| Frequencies -- | 1052.0702 | 1052.6817 | 1053.0369 |

|                |           |           |           |
|----------------|-----------|-----------|-----------|
| Frequencies -- | 1059.0343 | 1075.5384 | 1089.0893 |
| Frequencies -- | 1090.6997 | 1094.9028 | 1110.5437 |
| Frequencies -- | 1122.3723 | 1127.3044 | 1188.2187 |
| Frequencies -- | 1206.0469 | 1216.0494 | 1217.3727 |
| Frequencies -- | 1217.7969 | 1264.8217 | 1285.5338 |
| Frequencies -- | 1286.1968 | 1320.0426 | 1321.1373 |
| Frequencies -- | 1326.1283 | 1339.0047 | 1342.2843 |
| Frequencies -- | 1343.9778 | 1354.7784 | 1389.3837 |
| Frequencies -- | 1396.6387 | 1413.7670 | 1417.9618 |
| Frequencies -- | 1418.3194 | 1419.7128 | 1423.6329 |
| Frequencies -- | 1425.7240 | 1426.9261 | 1427.9830 |
| Frequencies -- | 1440.1524 | 1442.8570 | 1447.4986 |
| Frequencies -- | 1449.4381 | 1457.4046 | 1470.2013 |
| Frequencies -- | 1470.5002 | 1472.4190 | 1490.3560 |
| Frequencies -- | 1493.0456 | 1501.5386 | 1503.2245 |
| Frequencies -- | 1586.8399 | 1590.5427 | 1595.2952 |
| Frequencies -- | 1596.4891 | 1597.0894 | 1620.3209 |
| Frequencies -- | 1621.2222 | 1622.7697 | 2982.2637 |
| Frequencies -- | 2993.8930 | 3022.1630 | 3029.6070 |
| Frequencies -- | 3103.3338 | 3109.2915 | 3116.0802 |
| Frequencies -- | 3131.6426 | 3139.3641 | 3140.3338 |
| Frequencies -- | 3141.1794 | 3166.0761 | 3202.3397 |
| Frequencies -- | 3204.6479 | 3241.3611 | 3243.8453 |
| Frequencies -- | 3257.8942 | 3267.1659 | 3280.8710 |

**Catalyst 2:**

| <b>vacuum</b>  | <b>toluene-like solvent</b> | <b>D3 dispersion</b> |
|----------------|-----------------------------|----------------------|
| -3003.09497634 | -3003.10696                 | -0.52495552          |

|                |          |          |          |
|----------------|----------|----------|----------|
| Frequencies -- | 2.2515   | 7.7241   | 12.7659  |
| Frequencies -- | 14.5809  | 17.8025  | 21.8994  |
| Frequencies -- | 27.2799  | 30.7410  | 32.3365  |
| Frequencies -- | 32.5484  | 40.0318  | 41.4731  |
| Frequencies -- | 44.9100  | 53.2249  | 68.7259  |
| Frequencies -- | 73.9885  | 80.9341  | 102.7277 |
| Frequencies -- | 105.4604 | 106.5233 | 111.7729 |
| Frequencies -- | 116.2932 | 119.0545 | 120.1331 |
| Frequencies -- | 126.1707 | 141.6821 | 147.3127 |
| Frequencies -- | 152.1899 | 153.1229 | 157.7356 |
| Frequencies -- | 161.5354 | 161.9998 | 172.5194 |
| Frequencies -- | 187.7536 | 204.2461 | 213.8749 |
| Frequencies -- | 218.0111 | 219.5602 | 220.2478 |
| Frequencies -- | 224.1195 | 236.9823 | 240.1818 |
| Frequencies -- | 264.2416 | 264.6916 | 265.1615 |
| Frequencies -- | 265.2506 | 271.1433 | 272.1140 |
| Frequencies -- | 273.5848 | 282.2749 | 286.7557 |
| Frequencies -- | 290.4191 | 293.7651 | 294.2927 |
| Frequencies -- | 309.4914 | 315.8279 | 319.2492 |
| Frequencies -- | 321.8049 | 324.4470 | 333.6305 |
| Frequencies -- | 338.5021 | 340.8289 | 343.3184 |
| Frequencies -- | 359.5162 | 371.2903 | 379.8563 |
| Frequencies -- | 380.2314 | 381.1593 | 389.5457 |
| Frequencies -- | 391.0498 | 397.6054 | 432.0930 |
| Frequencies -- | 432.3652 | 432.9311 | 457.0248 |
| Frequencies -- | 457.5011 | 459.5537 | 478.5766 |
| Frequencies -- | 505.5907 | 514.4608 | 528.9682 |
| Frequencies -- | 541.5027 | 542.1543 | 547.2263 |
| Frequencies -- | 548.1533 | 562.0914 | 569.8540 |
| Frequencies -- | 575.1550 | 594.6597 | 595.5970 |
| Frequencies -- | 597.8872 | 606.1287 | 632.2184 |

|                |           |           |           |
|----------------|-----------|-----------|-----------|
| Frequencies -- | 639.6316  | 640.1250  | 643.0142  |
| Frequencies -- | 661.7951  | 663.2385  | 686.7697  |
| Frequencies -- | 694.6666  | 708.8952  | 729.0983  |
| Frequencies -- | 729.8624  | 734.2598  | 742.6480  |
| Frequencies -- | 759.1825  | 760.7777  | 771.4906  |
| Frequencies -- | 773.4528  | 787.0257  | 796.3377  |
| Frequencies -- | 801.9650  | 813.9915  | 827.7881  |
| Frequencies -- | 834.1251  | 840.3164  | 841.3518  |
| Frequencies -- | 852.1779  | 866.9487  | 870.1487  |
| Frequencies -- | 871.5679  | 894.4541  | 906.3184  |
| Frequencies -- | 909.8903  | 912.2586  | 924.6109  |
| Frequencies -- | 935.5024  | 995.1402  | 996.2805  |
| Frequencies -- | 1021.2681 | 1024.6655 | 1025.3665 |
| Frequencies -- | 1027.4016 | 1027.9840 | 1035.7438 |
| Frequencies -- | 1048.7229 | 1050.8813 | 1052.5452 |
| Frequencies -- | 1058.6329 | 1080.1710 | 1090.7300 |
| Frequencies -- | 1093.5909 | 1094.3166 | 1097.2558 |
| Frequencies -- | 1099.1248 | 1102.7291 | 1108.5364 |
| Frequencies -- | 1120.6290 | 1127.3263 | 1183.3899 |
| Frequencies -- | 1190.1962 | 1205.2936 | 1215.8075 |
| Frequencies -- | 1216.9474 | 1217.4254 | 1258.3004 |
| Frequencies -- | 1278.7507 | 1285.7057 | 1288.0015 |
| Frequencies -- | 1288.4717 | 1320.4082 | 1320.5268 |
| Frequencies -- | 1325.9391 | 1326.5512 | 1338.8523 |
| Frequencies -- | 1341.4051 | 1342.5559 | 1343.2364 |
| Frequencies -- | 1379.5371 | 1389.5213 | 1397.0515 |
| Frequencies -- | 1413.0582 | 1415.3561 | 1417.8669 |
| Frequencies -- | 1418.5332 | 1419.3109 | 1430.8186 |
| Frequencies -- | 1432.4057 | 1439.8295 | 1442.5043 |
| Frequencies -- | 1448.0754 | 1449.8671 | 1462.6945 |
| Frequencies -- | 1467.5418 | 1469.8818 | 1470.4380 |
| Frequencies -- | 1472.3053 | 1478.6807 | 1492.9690 |
| Frequencies -- | 1500.3257 | 1501.8671 | 1507.0060 |
| Frequencies -- | 1507.5960 | 1595.4708 | 1596.7519 |
| Frequencies -- | 1597.0192 | 1598.9764 | 1607.1875 |
| Frequencies -- | 1620.1825 | 1620.9898 | 1622.5783 |
| Frequencies -- | 2983.2321 | 2990.9087 | 3013.0273 |
| Frequencies -- | 3015.8597 | 3017.2332 | 3021.8712 |
| Frequencies -- | 3063.3908 | 3067.1847 | 3106.0026 |
| Frequencies -- | 3116.0216 | 3120.5265 | 3121.6078 |
| Frequencies -- | 3123.6595 | 3134.3607 | 3136.3293 |
| Frequencies -- | 3160.9016 | 3172.5229 | 3206.8625 |
| Frequencies -- | 3215.3281 | 3241.6281 | 3243.9373 |
| Frequencies -- | 3257.0216 | 3265.1815 | 3279.9043 |

**Catalyst 3:**

| <b>vacuum</b> | <b>toluene-like solvent</b> | <b>D3 dispersion</b> |
|---------------|-----------------------------|----------------------|
| -3081.6707187 | -3081.681987                | -0.56435934          |

|                |          |          |          |
|----------------|----------|----------|----------|
| Frequencies -- | 6.2261   | 11.3502  | 12.5093  |
| Frequencies -- | 20.9982  | 27.2697  | 28.5361  |
| Frequencies -- | 29.7361  | 32.0349  | 34.4961  |
| Frequencies -- | 36.6000  | 39.1398  | 39.3913  |
| Frequencies -- | 46.4851  | 50.7832  | 67.0888  |
| Frequencies -- | 72.0007  | 74.6098  | 90.4595  |
| Frequencies -- | 102.0314 | 107.8972 | 110.9781 |
| Frequencies -- | 119.4638 | 119.8435 | 125.5050 |
| Frequencies -- | 126.4798 | 130.7363 | 143.7035 |
| Frequencies -- | 145.8713 | 147.9969 | 154.8409 |
| Frequencies -- | 157.5842 | 160.2611 | 163.4684 |



|                |           |           |           |
|----------------|-----------|-----------|-----------|
| Frequencies -- | 171.6820  | 184.5552  | 212.1293  |
| Frequencies -- | 215.1953  | 217.5882  | 221.6053  |
| Frequencies -- | 221.7631  | 230.3031  | 233.0174  |
| Frequencies -- | 239.2399  | 244.0314  | 250.1969  |
| Frequencies -- | 259.2651  | 263.2475  | 264.7813  |
| Frequencies -- | 264.9562  | 265.6145  | 271.5299  |
| Frequencies -- | 273.1278  | 275.4159  | 276.9528  |
| Frequencies -- | 283.8149  | 289.0183  | 293.4526  |
| Frequencies -- | 297.2079  | 308.1353  | 310.0973  |
| Frequencies -- | 313.1465  | 315.3101  | 323.6760  |
| Frequencies -- | 331.1533  | 334.6266  | 336.7877  |
| Frequencies -- | 342.2940  | 365.7370  | 378.8255  |
| Frequencies -- | 379.2469  | 380.8665  | 381.4527  |
| Frequencies -- | 384.7300  | 396.8047  | 427.3927  |
| Frequencies -- | 431.0272  | 431.6468  | 432.1963  |
| Frequencies -- | 433.4613  | 436.4796  | 454.1802  |
| Frequencies -- | 457.1363  | 457.6477  | 476.0474  |
| Frequencies -- | 509.7034  | 538.0421  | 540.6751  |
| Frequencies -- | 542.4704  | 544.6329  | 548.1316  |
| Frequencies -- | 560.7954  | 570.1519  | 589.1018  |
| Frequencies -- | 591.7335  | 600.7626  | 605.6172  |
| Frequencies -- | 613.8340  | 630.5865  | 632.5897  |
| Frequencies -- | 637.6636  | 639.1251  | 642.2115  |
| Frequencies -- | 655.3747  | 668.0911  | 691.8094  |
| Frequencies -- | 698.5827  | 722.7271  | 729.6474  |
| Frequencies -- | 731.0375  | 742.5761  | 754.9678  |
| Frequencies -- | 765.0429  | 765.3401  | 769.9679  |
| Frequencies -- | 797.7026  | 805.3933  | 816.7378  |
| Frequencies -- | 820.1468  | 820.8811  | 840.7419  |
| Frequencies -- | 842.0524  | 844.6717  | 852.6260  |
| Frequencies -- | 877.1680  | 878.8510  | 884.7914  |
| Frequencies -- | 904.0074  | 909.8581  | 910.4016  |
| Frequencies -- | 913.4000  | 928.1586  | 931.9136  |
| Frequencies -- | 932.6427  | 937.5102  | 940.4958  |
| Frequencies -- | 964.1106  | 965.3483  | 996.2745  |
| Frequencies -- | 1013.2149 | 1023.8444 | 1029.8195 |
| Frequencies -- | 1031.3564 | 1031.9773 | 1046.9323 |
| Frequencies -- | 1050.5712 | 1053.6652 | 1055.8615 |
| Frequencies -- | 1070.2713 | 1073.4300 | 1091.5902 |
| Frequencies -- | 1092.5908 | 1103.2449 | 1115.9198 |
| Frequencies -- | 1116.4622 | 1118.0991 | 1125.4034 |
| Frequencies -- | 1127.7100 | 1166.3658 | 1182.2689 |
| Frequencies -- | 1184.3040 | 1193.7591 | 1206.1992 |
| Frequencies -- | 1215.1395 | 1215.5598 | 1217.2908 |
| Frequencies -- | 1253.8142 | 1279.2857 | 1286.8415 |
| Frequencies -- | 1310.1105 | 1318.4272 | 1321.0988 |
| Frequencies -- | 1324.8796 | 1326.7903 | 1330.0514 |
| Frequencies -- | 1335.4409 | 1338.5411 | 1341.3053 |
| Frequencies -- | 1346.6693 | 1383.7426 | 1389.9750 |
| Frequencies -- | 1397.1417 | 1400.7974 | 1402.5764 |
| Frequencies -- | 1414.8618 | 1418.8963 | 1419.7055 |
| Frequencies -- | 1420.5895 | 1421.7394 | 1430.2890 |
| Frequencies -- | 1437.8724 | 1443.9290 | 1447.3451 |
| Frequencies -- | 1449.2387 | 1451.6932 | 1466.3654 |
| Frequencies -- | 1468.9339 | 1470.6733 | 1472.6665 |
| Frequencies -- | 1475.2459 | 1487.0302 | 1488.4398 |
| Frequencies -- | 1488.8273 | 1493.5990 | 1499.9919 |
| Frequencies -- | 1505.4894 | 1506.9234 | 1507.9695 |
| Frequencies -- | 1594.7547 | 1595.8463 | 1596.7797 |
| Frequencies -- | 1597.4324 | 1605.4316 | 1619.1171 |
| Frequencies -- | 1621.4161 | 1623.3783 | 2976.5873 |
| Frequencies -- | 2990.3934 | 3006.8297 | 3008.9459 |
| Frequencies -- | 3011.0487 | 3019.1629 | 3070.6057 |

|                |           |           |           |
|----------------|-----------|-----------|-----------|
| Frequencies -- | 3105.8353 | 3109.8319 | 3110.9678 |
| Frequencies -- | 3112.2160 | 3112.8435 | 3116.2503 |
| Frequencies -- | 3117.6632 | 3118.1494 | 3125.8516 |
| Frequencies -- | 3133.0243 | 3136.2987 | 3152.0201 |
| Frequencies -- | 3167.7187 | 3168.4418 | 3188.3446 |
| Frequencies -- | 3201.3402 | 3246.0233 | 3248.0936 |
| Frequencies -- | 3262.1491 | 3269.8992 | 3284.1743 |

**Catalyst 4:**

| <b>vacuum</b>  | <b>toluene-like solvent</b> | <b>D3 dispersion</b> |
|----------------|-----------------------------|----------------------|
| -3042.40812302 | -3042.418617                | -0.54218856          |

|                |           |           |           |
|----------------|-----------|-----------|-----------|
| Frequencies -- | 7.4575    | 10.9138   | 12.7937   |
| Frequencies -- | 18.6396   | 23.9836   | 26.1311   |
| Frequencies -- | 28.6468   | 31.1611   | 31.5757   |
| Frequencies -- | 38.7946   | 40.4266   | 43.5687   |
| Frequencies -- | 47.9659   | 70.0621   | 83.4815   |
| Frequencies -- | 101.8387  | 104.7607  | 106.7026  |
| Frequencies -- | 113.6867  | 116.2342  | 117.8985  |
| Frequencies -- | 118.3148  | 123.7391  | 126.4256  |
| Frequencies -- | 128.6095  | 137.8902  | 139.9630  |
| Frequencies -- | 141.8719  | 146.2670  | 150.9300  |
| Frequencies -- | 153.3307  | 154.0377  | 157.1098  |
| Frequencies -- | 160.1033  | 161.3888  | 162.7197  |
| Frequencies -- | 166.1207  | 170.1757  | 199.6058  |
| Frequencies -- | 211.4490  | 216.6044  | 218.1137  |
| Frequencies -- | 219.0294  | 228.7589  | 247.3685  |
| Frequencies -- | 263.3391  | 264.4272  | 264.7570  |
| Frequencies -- | 266.4115  | 270.0229  | 272.4465  |
| Frequencies -- | 282.1782  | 285.3288  | 286.3316  |
| Frequencies -- | 291.2188  | 291.8276  | 299.2396  |
| Frequencies -- | 301.2863  | 308.8352  | 312.2730  |
| Frequencies -- | 317.5207  | 321.0057  | 329.0404  |
| Frequencies -- | 331.7023  | 333.5529  | 338.9463  |
| Frequencies -- | 349.0299  | 378.4917  | 378.8383  |
| Frequencies -- | 379.2991  | 384.0763  | 387.2431  |
| Frequencies -- | 390.3028  | 396.2000  | 408.7797  |
| Frequencies -- | 417.6359  | 432.1630  | 432.7202  |
| Frequencies -- | 432.9636  | 447.3392  | 452.8966  |
| Frequencies -- | 456.3364  | 457.5357  | 473.3632  |
| Frequencies -- | 507.6576  | 516.7102  | 531.0547  |
| Frequencies -- | 536.3640  | 541.3362  | 542.0276  |
| Frequencies -- | 547.8614  | 554.7074  | 579.7443  |
| Frequencies -- | 583.1250  | 592.4301  | 596.0538  |
| Frequencies -- | 605.2648  | 606.6624  | 614.9284  |
| Frequencies -- | 630.4993  | 638.3019  | 638.6365  |
| Frequencies -- | 641.3417  | 654.8510  | 661.4687  |
| Frequencies -- | 663.2072  | 690.0076  | 694.8296  |
| Frequencies -- | 700.9178  | 726.8739  | 729.0796  |
| Frequencies -- | 741.9823  | 757.3771  | 758.7547  |
| Frequencies -- | 762.3295  | 770.3076  | 800.8835  |
| Frequencies -- | 802.8625  | 837.6813  | 840.3699  |
| Frequencies -- | 859.5512  | 868.7714  | 906.6758  |
| Frequencies -- | 907.3164  | 910.4744  | 921.6818  |
| Frequencies -- | 927.1365  | 968.8808  | 970.2284  |
| Frequencies -- | 977.4049  | 1000.7981 | 1008.3074 |
| Frequencies -- | 1010.2382 | 1023.8747 | 1025.8775 |
| Frequencies -- | 1030.4945 | 1042.3680 | 1043.0363 |
| Frequencies -- | 1046.4892 | 1047.3080 | 1048.0541 |
| Frequencies -- | 1049.1017 | 1049.3537 | 1051.5283 |

|                |           |           |           |
|----------------|-----------|-----------|-----------|
| Frequencies -- | 1074.7333 | 1088.4723 | 1089.7492 |
| Frequencies -- | 1090.5498 | 1101.7998 | 1125.9873 |
| Frequencies -- | 1140.7653 | 1171.3254 | 1175.9266 |
| Frequencies -- | 1183.5488 | 1190.3825 | 1193.3694 |
| Frequencies -- | 1213.8683 | 1214.9553 | 1215.8277 |
| Frequencies -- | 1242.1489 | 1319.6503 | 1321.6948 |
| Frequencies -- | 1326.4852 | 1326.5542 | 1338.8968 |
| Frequencies -- | 1341.7924 | 1344.6127 | 1376.2358 |
| Frequencies -- | 1409.8105 | 1415.4808 | 1417.5078 |
| Frequencies -- | 1417.9840 | 1420.1458 | 1425.6053 |
| Frequencies -- | 1426.2546 | 1427.5486 | 1430.1796 |
| Frequencies -- | 1433.4927 | 1437.9000 | 1443.2491 |
| Frequencies -- | 1447.2846 | 1455.0059 | 1455.3048 |
| Frequencies -- | 1459.4921 | 1468.0337 | 1469.4076 |
| Frequencies -- | 1469.8152 | 1471.6751 | 1481.5553 |
| Frequencies -- | 1481.8518 | 1484.4916 | 1492.1426 |
| Frequencies -- | 1496.0347 | 1498.8086 | 1501.0317 |
| Frequencies -- | 1506.6307 | 1507.9780 | 1512.3770 |
| Frequencies -- | 1516.4539 | 1517.3179 | 1595.7607 |
| Frequencies -- | 1596.7834 | 1597.3979 | 1597.7064 |
| Frequencies -- | 1607.3365 | 1620.3938 | 1620.6541 |
| Frequencies -- | 1622.3728 | 2987.7061 | 3006.5559 |
| Frequencies -- | 3010.3094 | 3010.9133 | 3012.4384 |
| Frequencies -- | 3014.4340 | 3016.4811 | 3101.8285 |
| Frequencies -- | 3102.8472 | 3104.2318 | 3105.4249 |
| Frequencies -- | 3109.0786 | 3111.5557 | 3131.2007 |
| Frequencies -- | 3140.9786 | 3141.1791 | 3145.8070 |
| Frequencies -- | 3148.5771 | 3151.0642 | 3159.2693 |
| Frequencies -- | 3167.8581 | 3176.6355 | 3192.6747 |
| Frequencies -- | 3194.5816 | 3202.8280 | 3210.8206 |

**Catalyst 5:**

| <b>vacuum</b>  | <b>toluene-like solvent</b> | <b>D3 dispersion</b> |
|----------------|-----------------------------|----------------------|
| -3141.63255757 | -3141.644913                | -0.54295154          |

|                |          |          |          |
|----------------|----------|----------|----------|
| Frequencies -- | 9.1656   | 11.2329  | 13.4093  |
| Frequencies -- | 16.5521  | 23.9196  | 25.7465  |
| Frequencies -- | 27.2175  | 32.0072  | 32.8185  |
| Frequencies -- | 38.3209  | 39.5242  | 43.3612  |
| Frequencies -- | 44.1938  | 69.6271  | 79.3178  |
| Frequencies -- | 98.0048  | 103.7608 | 104.8886 |
| Frequencies -- | 105.8488 | 111.1352 | 112.9738 |
| Frequencies -- | 117.8700 | 118.5789 | 123.3260 |
| Frequencies -- | 125.4633 | 127.0913 | 137.2621 |
| Frequencies -- | 139.5648 | 144.2661 | 146.8385 |
| Frequencies -- | 151.5981 | 153.0002 | 157.2191 |
| Frequencies -- | 160.1675 | 160.5810 | 161.3168 |
| Frequencies -- | 163.8967 | 167.2028 | 191.7001 |
| Frequencies -- | 207.2377 | 213.6002 | 216.3123 |
| Frequencies -- | 218.7642 | 219.2235 | 248.6073 |
| Frequencies -- | 259.2337 | 264.1393 | 264.6984 |
| Frequencies -- | 264.9086 | 268.8735 | 270.6922 |
| Frequencies -- | 273.5434 | 283.2566 | 284.8535 |
| Frequencies -- | 287.1750 | 292.3740 | 292.7451 |
| Frequencies -- | 298.6860 | 303.1161 | 308.8742 |
| Frequencies -- | 310.6428 | 314.5136 | 321.2656 |
| Frequencies -- | 331.2864 | 333.8249 | 339.7733 |
| Frequencies -- | 355.1100 | 360.3806 | 372.5047 |
| Frequencies -- | 379.3693 | 379.9266 | 380.3093 |
| Frequencies -- | 387.9485 | 389.8807 | 392.5512 |

|                |           |           |           |
|----------------|-----------|-----------|-----------|
| Frequencies -- | 405.9008  | 415.9341  | 417.4618  |
| Frequencies -- | 432.5044  | 432.8223  | 433.2480  |
| Frequencies -- | 454.0878  | 456.4490  | 457.5458  |
| Frequencies -- | 461.1341  | 474.0143  | 511.6150  |
| Frequencies -- | 516.9474  | 530.8679  | 535.9737  |
| Frequencies -- | 541.3469  | 542.4384  | 548.0230  |
| Frequencies -- | 555.1268  | 568.2514  | 580.2073  |
| Frequencies -- | 582.8882  | 592.7773  | 596.5403  |
| Frequencies -- | 604.4313  | 612.9116  | 630.8975  |
| Frequencies -- | 633.2327  | 638.5445  | 639.1008  |
| Frequencies -- | 642.0025  | 662.6083  | 662.6816  |
| Frequencies -- | 694.4052  | 701.0401  | 705.9405  |
| Frequencies -- | 727.6229  | 729.1895  | 742.4489  |
| Frequencies -- | 758.5988  | 759.2064  | 770.6301  |
| Frequencies -- | 793.1362  | 801.7404  | 804.3456  |
| Frequencies -- | 810.0619  | 834.5569  | 840.5564  |
| Frequencies -- | 859.6143  | 870.6996  | 906.9729  |
| Frequencies -- | 907.7931  | 911.0930  | 926.4733  |
| Frequencies -- | 950.0408  | 961.8481  | 969.5515  |
| Frequencies -- | 972.8803  | 1012.1767 | 1014.4566 |
| Frequencies -- | 1024.1684 | 1026.5546 | 1043.2162 |
| Frequencies -- | 1043.4482 | 1046.4288 | 1047.9058 |
| Frequencies -- | 1048.0912 | 1049.3925 | 1049.8712 |
| Frequencies -- | 1052.1173 | 1076.7918 | 1089.7788 |
| Frequencies -- | 1090.2011 | 1103.5903 | 1113.8825 |
| Frequencies -- | 1127.3539 | 1130.6253 | 1169.5097 |
| Frequencies -- | 1171.7354 | 1175.4412 | 1193.4495 |
| Frequencies -- | 1205.0667 | 1214.4526 | 1215.7087 |
| Frequencies -- | 1216.4046 | 1258.6630 | 1306.2700 |
| Frequencies -- | 1320.3407 | 1321.3925 | 1326.5850 |
| Frequencies -- | 1339.3481 | 1342.3053 | 1344.5174 |
| Frequencies -- | 1361.3828 | 1412.1393 | 1415.6089 |
| Frequencies -- | 1417.6544 | 1418.6739 | 1420.4001 |
| Frequencies -- | 1423.2527 | 1425.6884 | 1426.9981 |
| Frequencies -- | 1429.1199 | 1430.0084 | 1434.2371 |
| Frequencies -- | 1437.7514 | 1446.2857 | 1447.1468 |
| Frequencies -- | 1455.7822 | 1458.9053 | 1467.1806 |
| Frequencies -- | 1469.7108 | 1469.9159 | 1471.8327 |
| Frequencies -- | 1476.3354 | 1482.1234 | 1491.6015 |
| Frequencies -- | 1494.6459 | 1496.5206 | 1499.6544 |
| Frequencies -- | 1500.6322 | 1506.7914 | 1508.4245 |
| Frequencies -- | 1512.8982 | 1516.1467 | 1517.8613 |
| Frequencies -- | 1595.8620 | 1596.9733 | 1597.5665 |
| Frequencies -- | 1599.0862 | 1616.4042 | 1620.3032 |
| Frequencies -- | 1620.7260 | 1622.3796 | 2988.7629 |
| Frequencies -- | 3006.5402 | 3010.9975 | 3011.8442 |
| Frequencies -- | 3012.9626 | 3014.7881 | 3016.5604 |
| Frequencies -- | 3102.5592 | 3103.4503 | 3104.9072 |
| Frequencies -- | 3106.0846 | 3109.2574 | 3113.4741 |
| Frequencies -- | 3134.5014 | 3141.3125 | 3141.9216 |
| Frequencies -- | 3145.1603 | 3147.7770 | 3150.3646 |
| Frequencies -- | 3160.6746 | 3190.7633 | 3200.7622 |
| Frequencies -- | 3201.8524 | 3218.1632 | 3221.7794 |

**Catalyst 6:**

| <b>vacuum</b> | <b>toluene-like solvent</b> | <b>D3 dispersion</b> |
|---------------|-----------------------------|----------------------|
| -3056.7624852 | -3056.774044                | -0.55014210          |

|                |         |         |         |
|----------------|---------|---------|---------|
| Frequencies -- | 7.4819  | 13.2981 | 13.7339 |
| Frequencies -- | 16.8949 | 23.3456 | 25.3273 |

|                |           |           |           |
|----------------|-----------|-----------|-----------|
| Frequencies -- | 26.0496   | 28.7215   | 32.1136   |
| Frequencies -- | 36.9272   | 37.6812   | 42.1525   |
| Frequencies -- | 43.0145   | 67.8085   | 75.6667   |
| Frequencies -- | 86.9208   | 92.6410   | 100.6043  |
| Frequencies -- | 103.0469  | 104.9650  | 106.3901  |
| Frequencies -- | 110.7995  | 117.3213  | 118.4724  |
| Frequencies -- | 119.6614  | 123.1229  | 130.3334  |
| Frequencies -- | 134.8883  | 140.4912  | 145.3473  |
| Frequencies -- | 152.1194  | 152.6861  | 157.2608  |
| Frequencies -- | 159.2796  | 160.6184  | 160.9833  |
| Frequencies -- | 165.8439  | 166.9798  | 179.0035  |
| Frequencies -- | 195.3914  | 208.1511  | 210.0014  |
| Frequencies -- | 218.1506  | 218.4453  | 230.5105  |
| Frequencies -- | 241.4910  | 252.5362  | 263.7580  |
| Frequencies -- | 264.5480  | 264.7653  | 265.4150  |
| Frequencies -- | 271.2916  | 273.4032  | 279.5339  |
| Frequencies -- | 281.8326  | 286.4732  | 290.1764  |
| Frequencies -- | 293.4787  | 296.0643  | 299.4426  |
| Frequencies -- | 305.1488  | 308.5676  | 314.9626  |
| Frequencies -- | 319.1402  | 331.5710  | 333.4893  |
| Frequencies -- | 337.5626  | 339.5987  | 345.7671  |
| Frequencies -- | 378.5219  | 379.8974  | 380.1038  |
| Frequencies -- | 380.7390  | 388.2335  | 389.1923  |
| Frequencies -- | 395.2258  | 407.7970  | 409.2152  |
| Frequencies -- | 432.3687  | 432.6604  | 432.9902  |
| Frequencies -- | 451.4614  | 453.1189  | 456.6011  |
| Frequencies -- | 457.3744  | 471.4009  | 473.3423  |
| Frequencies -- | 487.2583  | 515.0729  | 530.9914  |
| Frequencies -- | 536.3966  | 541.1238  | 542.1917  |
| Frequencies -- | 547.8727  | 555.9772  | 577.3349  |
| Frequencies -- | 581.7808  | 592.4573  | 596.5166  |
| Frequencies -- | 603.6248  | 609.0074  | 628.5937  |
| Frequencies -- | 630.1194  | 638.6423  | 639.1005  |
| Frequencies -- | 641.7759  | 642.7966  | 661.5806  |
| Frequencies -- | 662.8663  | 680.7411  | 693.9879  |
| Frequencies -- | 710.9740  | 727.7788  | 729.1075  |
| Frequencies -- | 741.5491  | 757.9102  | 759.1060  |
| Frequencies -- | 770.5310  | 782.4270  | 788.5002  |
| Frequencies -- | 801.8061  | 805.0587  | 838.5398  |
| Frequencies -- | 858.5806  | 869.7079  | 906.4397  |
| Frequencies -- | 907.6246  | 910.5694  | 922.3471  |
| Frequencies -- | 932.9875  | 947.7680  | 969.9343  |
| Frequencies -- | 972.2229  | 1010.0112 | 1012.9917 |
| Frequencies -- | 1023.5213 | 1025.9312 | 1041.9506 |
| Frequencies -- | 1042.7381 | 1046.0517 | 1046.8684 |
| Frequencies -- | 1048.1310 | 1049.2391 | 1049.6918 |
| Frequencies -- | 1051.9204 | 1074.6688 | 1076.2790 |
| Frequencies -- | 1089.4492 | 1090.0284 | 1098.7250 |
| Frequencies -- | 1117.8108 | 1127.0636 | 1129.7587 |
| Frequencies -- | 1171.2740 | 1175.8507 | 1188.6982 |
| Frequencies -- | 1191.8801 | 1214.1553 | 1215.6948 |
| Frequencies -- | 1216.4556 | 1250.2491 | 1309.9842 |
| Frequencies -- | 1319.2574 | 1321.5471 | 1326.6166 |
| Frequencies -- | 1339.4976 | 1342.7144 | 1344.2333 |
| Frequencies -- | 1353.9545 | 1411.6563 | 1415.7653 |
| Frequencies -- | 1416.4247 | 1417.4471 | 1418.9420 |
| Frequencies -- | 1420.4583 | 1425.2351 | 1426.8766 |
| Frequencies -- | 1427.7190 | 1429.5257 | 1431.4943 |
| Frequencies -- | 1435.8483 | 1442.9153 | 1447.1626 |
| Frequencies -- | 1454.3732 | 1458.3176 | 1464.0662 |
| Frequencies -- | 1469.1736 | 1469.7271 | 1471.6028 |
| Frequencies -- | 1476.4594 | 1481.6100 | 1485.5966 |
| Frequencies -- | 1491.7054 | 1495.2102 | 1498.0006 |

|                |           |           |           |
|----------------|-----------|-----------|-----------|
| Frequencies -- | 1501.5877 | 1506.0847 | 1508.2318 |
| Frequencies -- | 1510.8417 | 1515.3974 | 1517.6541 |
| Frequencies -- | 1581.0372 | 1595.7321 | 1596.8485 |
| Frequencies -- | 1597.5173 | 1603.5855 | 1620.0371 |
| Frequencies -- | 1620.6671 | 1622.3309 | 2988.0417 |
| Frequencies -- | 3009.6680 | 3011.3661 | 3011.9885 |
| Frequencies -- | 3013.3647 | 3015.3187 | 3016.5756 |
| Frequencies -- | 3101.6966 | 3102.6746 | 3105.3816 |
| Frequencies -- | 3106.3363 | 3109.9721 | 3112.1302 |
| Frequencies -- | 3133.8308 | 3141.3582 | 3146.2979 |
| Frequencies -- | 3146.5880 | 3148.9164 | 3151.6381 |
| Frequencies -- | 3159.8154 | 3197.1035 | 3199.4708 |
| Frequencies -- | 3201.2929 | 3215.7655 | 3220.9132 |

**Catalyst 7:**

| <b>vacuum</b>  | <b>toluene-like solvent</b> | <b>D3 dispersion</b> |
|----------------|-----------------------------|----------------------|
| -3054.96633024 | -3054.977669                | -0.55122293          |

|                |          |          |          |
|----------------|----------|----------|----------|
| Frequencies -- | -4.5362  | 8.4499   | 9.7312   |
| Frequencies -- | 12.7005  | 22.9240  | 24.0436  |
| Frequencies -- | 26.6315  | 30.6349  | 31.5702  |
| Frequencies -- | 37.0188  | 39.0741  | 40.5414  |
| Frequencies -- | 43.6621  | 66.3563  | 71.1801  |
| Frequencies -- | 88.1461  | 95.0956  | 100.3853 |
| Frequencies -- | 104.0714 | 105.1078 | 109.3928 |
| Frequencies -- | 115.5040 | 117.8461 | 119.2343 |
| Frequencies -- | 123.4603 | 128.2501 | 134.0841 |
| Frequencies -- | 138.6268 | 144.1283 | 151.0729 |
| Frequencies -- | 152.8628 | 156.9054 | 157.1059 |
| Frequencies -- | 159.9428 | 161.3094 | 162.7705 |
| Frequencies -- | 162.9515 | 168.7607 | 179.5432 |
| Frequencies -- | 194.5150 | 202.6645 | 209.4295 |
| Frequencies -- | 217.0185 | 219.1882 | 234.4782 |
| Frequencies -- | 236.2920 | 243.9658 | 253.1287 |
| Frequencies -- | 258.4472 | 264.4816 | 264.5543 |
| Frequencies -- | 264.7790 | 270.1029 | 272.8601 |
| Frequencies -- | 279.7873 | 285.3557 | 289.1302 |
| Frequencies -- | 291.4665 | 292.3541 | 297.4693 |
| Frequencies -- | 303.7150 | 308.1887 | 313.8574 |
| Frequencies -- | 319.4136 | 331.3392 | 333.8190 |
| Frequencies -- | 338.3300 | 348.3480 | 353.9142 |
| Frequencies -- | 378.9134 | 379.0570 | 379.6055 |
| Frequencies -- | 380.2562 | 388.4096 | 389.9713 |
| Frequencies -- | 394.3872 | 402.3532 | 412.6566 |
| Frequencies -- | 432.2991 | 432.7378 | 432.8775 |
| Frequencies -- | 436.1520 | 452.9827 | 454.0477 |
| Frequencies -- | 456.3745 | 457.6777 | 474.0651 |
| Frequencies -- | 506.6018 | 513.3175 | 530.6809 |
| Frequencies -- | 535.8262 | 541.0169 | 542.1176 |
| Frequencies -- | 547.8836 | 555.1337 | 574.6144 |
| Frequencies -- | 582.0703 | 592.0836 | 596.1602 |
| Frequencies -- | 602.7532 | 610.1528 | 627.6896 |
| Frequencies -- | 630.8407 | 638.9004 | 639.4230 |
| Frequencies -- | 642.2140 | 661.7932 | 662.6127 |
| Frequencies -- | 675.7966 | 694.8978 | 699.4661 |
| Frequencies -- | 706.5309 | 727.2878 | 729.2357 |
| Frequencies -- | 742.5856 | 758.4988 | 759.1324 |
| Frequencies -- | 770.5198 | 802.0001 | 803.2412 |
| Frequencies -- | 819.9466 | 833.2985 | 840.9037 |
| Frequencies -- | 858.1323 | 868.0407 | 907.0205 |

|                |           |           |           |
|----------------|-----------|-----------|-----------|
| Frequencies -- | 907.4201  | 910.7701  | 925.8772  |
| Frequencies -- | 956.3135  | 967.3648  | 970.2513  |
| Frequencies -- | 973.1278  | 1009.6526 | 1017.9044 |
| Frequencies -- | 1023.8257 | 1025.3159 | 1041.7571 |
| Frequencies -- | 1043.0326 | 1045.8449 | 1047.3129 |
| Frequencies -- | 1048.4431 | 1048.7846 | 1049.3178 |
| Frequencies -- | 1051.8799 | 1063.9280 | 1074.0707 |
| Frequencies -- | 1089.4474 | 1089.6472 | 1099.2328 |
| Frequencies -- | 1116.3462 | 1127.3191 | 1129.1561 |
| Frequencies -- | 1171.6583 | 1175.3503 | 1190.0854 |
| Frequencies -- | 1193.3118 | 1214.3019 | 1215.4213 |
| Frequencies -- | 1216.0194 | 1253.0409 | 1308.2644 |
| Frequencies -- | 1319.7345 | 1321.2385 | 1326.3097 |
| Frequencies -- | 1338.8978 | 1341.7425 | 1344.6694 |
| Frequencies -- | 1349.4627 | 1407.8003 | 1411.3647 |
| Frequencies -- | 1415.2453 | 1417.1137 | 1418.2150 |
| Frequencies -- | 1420.1495 | 1424.5855 | 1426.6136 |
| Frequencies -- | 1428.9448 | 1429.3542 | 1432.3051 |
| Frequencies -- | 1436.1637 | 1445.7729 | 1447.1577 |
| Frequencies -- | 1455.4570 | 1458.4617 | 1464.7341 |
| Frequencies -- | 1469.7063 | 1469.7149 | 1471.7243 |
| Frequencies -- | 1474.0878 | 1479.7075 | 1482.2766 |
| Frequencies -- | 1492.1949 | 1494.0597 | 1500.0947 |
| Frequencies -- | 1500.6141 | 1506.5650 | 1508.4537 |
| Frequencies -- | 1512.8211 | 1515.4146 | 1518.2022 |
| Frequencies -- | 1576.9339 | 1595.6324 | 1596.4605 |
| Frequencies -- | 1596.6475 | 1597.5813 | 1620.4515 |
| Frequencies -- | 1620.6248 | 1622.3722 | 2987.2198 |
| Frequencies -- | 3005.5984 | 3011.4695 | 3011.9381 |
| Frequencies -- | 3013.3690 | 3015.1585 | 3016.7959 |
| Frequencies -- | 3102.9624 | 3103.7995 | 3105.1127 |
| Frequencies -- | 3105.7457 | 3108.5540 | 3114.4680 |
| Frequencies -- | 3132.6309 | 3141.7060 | 3142.4216 |
| Frequencies -- | 3145.5789 | 3149.4009 | 3151.3640 |
| Frequencies -- | 3161.9564 | 3192.7242 | 3193.2588 |
| Frequencies -- | 3194.7213 | 3210.1352 | 3214.0284 |

**Catalyst 8:**

| <b>vacuum</b>  | <b>toluene-like solvent</b> | <b>D3 dispersion</b> |
|----------------|-----------------------------|----------------------|
| -3273.35926321 | -3273.371798                | -0.61743878          |

|                |          |          |          |
|----------------|----------|----------|----------|
| Frequencies -- | 5.3452   | 7.7819   | 13.3511  |
| Frequencies -- | 15.4487  | 23.4251  | 24.0635  |
| Frequencies -- | 24.8110  | 26.6002  | 31.1792  |
| Frequencies -- | 32.1932  | 37.9960  | 40.1856  |
| Frequencies -- | 43.2498  | 56.4325  | 65.5027  |
| Frequencies -- | 72.8355  | 76.2219  | 91.3249  |
| Frequencies -- | 103.4530 | 104.1342 | 106.2935 |
| Frequencies -- | 107.4256 | 116.7681 | 117.7637 |
| Frequencies -- | 118.1445 | 119.5889 | 119.7930 |
| Frequencies -- | 124.6854 | 136.1147 | 137.5995 |
| Frequencies -- | 146.6395 | 151.6695 | 152.4193 |
| Frequencies -- | 155.9034 | 156.4366 | 157.2048 |
| Frequencies -- | 159.5887 | 160.7348 | 161.2734 |
| Frequencies -- | 163.4542 | 176.4932 | 192.1722 |
| Frequencies -- | 206.6409 | 211.3236 | 216.7829 |
| Frequencies -- | 218.1605 | 218.5793 | 238.8502 |
| Frequencies -- | 246.5398 | 260.5140 | 264.6752 |
| Frequencies -- | 264.9797 | 265.1358 | 269.6802 |
| Frequencies -- | 272.3294 | 274.7969 | 282.1071 |

|                |           |           |           |
|----------------|-----------|-----------|-----------|
| Frequencies -- | 287.5345  | 289.5893  | 291.7790  |
| Frequencies -- | 294.2082  | 299.9532  | 303.7706  |
| Frequencies -- | 308.9199  | 314.4898  | 317.6811  |
| Frequencies -- | 330.9120  | 332.7294  | 336.0735  |
| Frequencies -- | 338.8927  | 349.2885  | 367.9604  |
| Frequencies -- | 378.3510  | 379.3715  | 380.0174  |
| Frequencies -- | 388.2494  | 388.9293  | 393.3229  |
| Frequencies -- | 399.3568  | 407.6014  | 415.7507  |
| Frequencies -- | 420.8392  | 432.4936  | 432.6879  |
| Frequencies -- | 432.7847  | 438.6366  | 452.4575  |
| Frequencies -- | 456.3514  | 457.3676  | 459.1191  |
| Frequencies -- | 473.0712  | 508.5021  | 515.4485  |
| Frequencies -- | 530.8535  | 536.6464  | 541.4763  |
| Frequencies -- | 542.0076  | 547.9307  | 555.2596  |
| Frequencies -- | 556.0272  | 576.8047  | 582.0336  |
| Frequencies -- | 592.5651  | 596.1960  | 603.1689  |
| Frequencies -- | 611.0368  | 621.6460  | 630.1629  |
| Frequencies -- | 638.2250  | 638.6765  | 638.8776  |
| Frequencies -- | 639.9711  | 641.4584  | 661.1902  |
| Frequencies -- | 662.5994  | 690.9197  | 695.4724  |
| Frequencies -- | 707.2536  | 724.4736  | 727.9294  |
| Frequencies -- | 728.9211  | 741.5869  | 748.6333  |
| Frequencies -- | 757.5984  | 758.5024  | 770.5789  |
| Frequencies -- | 773.8810  | 802.2422  | 804.1819  |
| Frequencies -- | 829.4457  | 839.6869  | 848.4499  |
| Frequencies -- | 858.8128  | 859.2100  | 869.7824  |
| Frequencies -- | 906.6593  | 907.6020  | 910.7254  |
| Frequencies -- | 929.1144  | 932.9259  | 962.9739  |
| Frequencies -- | 969.8222  | 971.4032  | 974.6600  |
| Frequencies -- | 986.9084  | 999.9177  | 1006.3388 |
| Frequencies -- | 1010.5958 | 1022.3991 | 1023.7149 |
| Frequencies -- | 1025.9813 | 1042.2681 | 1043.4615 |
| Frequencies -- | 1046.7469 | 1047.3737 | 1048.1749 |
| Frequencies -- | 1049.1436 | 1049.2965 | 1049.8473 |
| Frequencies -- | 1051.6488 | 1060.1963 | 1075.5693 |
| Frequencies -- | 1088.3493 | 1089.9934 | 1095.4221 |
| Frequencies -- | 1102.6646 | 1126.5207 | 1129.5726 |
| Frequencies -- | 1135.3154 | 1171.5910 | 1176.1516 |
| Frequencies -- | 1184.7773 | 1191.3351 | 1199.1064 |
| Frequencies -- | 1211.9723 | 1213.9523 | 1215.1071 |
| Frequencies -- | 1215.7956 | 1252.3576 | 1301.3696 |
| Frequencies -- | 1316.3514 | 1319.6317 | 1321.2438 |
| Frequencies -- | 1326.3774 | 1327.3070 | 1339.3326 |
| Frequencies -- | 1342.5406 | 1344.3798 | 1358.7654 |
| Frequencies -- | 1374.7609 | 1410.6756 | 1416.0163 |
| Frequencies -- | 1417.6893 | 1418.8248 | 1419.8879 |
| Frequencies -- | 1424.3715 | 1425.2733 | 1426.0007 |
| Frequencies -- | 1427.3282 | 1430.8841 | 1431.6840 |
| Frequencies -- | 1435.9275 | 1443.1412 | 1447.3509 |
| Frequencies -- | 1451.8180 | 1455.0857 | 1459.1795 |
| Frequencies -- | 1463.6849 | 1469.3604 | 1469.7219 |
| Frequencies -- | 1471.6040 | 1481.9136 | 1483.2401 |
| Frequencies -- | 1488.7260 | 1492.6146 | 1495.7454 |
| Frequencies -- | 1499.1998 | 1500.3302 | 1507.3808 |
| Frequencies -- | 1507.8714 | 1512.5991 | 1516.2094 |
| Frequencies -- | 1517.0968 | 1517.4648 | 1571.2335 |
| Frequencies -- | 1595.7472 | 1596.8947 | 1597.4368 |
| Frequencies -- | 1598.8618 | 1617.2735 | 1620.4691 |
| Frequencies -- | 1620.8824 | 1622.5645 | 1624.3473 |
| Frequencies -- | 2988.2072 | 3004.7110 | 3010.5996 |
| Frequencies -- | 3010.8969 | 3012.3221 | 3014.4810 |
| Frequencies -- | 3015.7072 | 3100.4899 | 3102.1878 |
| Frequencies -- | 3104.1952 | 3105.4444 | 3109.1176 |



|                |           |           |           |
|----------------|-----------|-----------|-----------|
| Frequencies -- | 3110.7766 | 3131.6980 | 3139.3642 |
| Frequencies -- | 3140.2976 | 3145.6269 | 3147.7159 |
| Frequencies -- | 3150.7306 | 3155.7013 | 3157.3992 |
| Frequencies -- | 3162.3980 | 3174.9835 | 3179.6198 |
| Frequencies -- | 3182.9888 | 3185.3017 | 3196.0477 |
| Frequencies -- | 3197.8172 | 3202.5461 | 3209.1140 |

**Catalyst 9:**

| <b>vacuum</b>  | <b>toluene-like solvent</b> | <b>D3 dispersion</b> |
|----------------|-----------------------------|----------------------|
| -3199.56519266 | -3199.57559                 | -0.61377851          |

|                |          |          |           |
|----------------|----------|----------|-----------|
| Frequencies -- | 5.7273   | 10.7811  | 11.2690   |
| Frequencies -- | 16.6040  | 23.1404  | 23.5430   |
| Frequencies -- | 25.5970  | 26.9690  | 31.5162   |
| Frequencies -- | 34.6494  | 37.8757  | 40.8181   |
| Frequencies -- | 43.3060  | 54.4273  | 66.7958   |
| Frequencies -- | 70.2066  | 83.5661  | 96.5900   |
| Frequencies -- | 98.9206  | 104.9837 | 106.0137  |
| Frequencies -- | 107.1456 | 112.6408 | 117.8255  |
| Frequencies -- | 118.5094 | 120.3157 | 124.5095  |
| Frequencies -- | 127.6228 | 134.5643 | 139.6464  |
| Frequencies -- | 140.9152 | 151.3639 | 153.3303  |
| Frequencies -- | 157.0829 | 157.2784 | 159.8945  |
| Frequencies -- | 160.4260 | 161.5484 | 167.6403  |
| Frequencies -- | 170.0402 | 182.2734 | 199.1936  |
| Frequencies -- | 207.1796 | 211.8522 | 216.4221  |
| Frequencies -- | 218.9918 | 223.5628 | 226.9631  |
| Frequencies -- | 246.2285 | 250.1952 | 263.5202  |
| Frequencies -- | 264.4079 | 264.6643 | 266.2893  |
| Frequencies -- | 268.9584 | 269.6397 | 273.3417  |
| Frequencies -- | 283.4512 | 283.5972 | 289.4956  |
| Frequencies -- | 291.7013 | 293.0372 | 299.4965  |
| Frequencies -- | 302.4320 | 304.0197 | 309.3672  |
| Frequencies -- | 313.9558 | 317.4071 | 320.5337  |
| Frequencies -- | 328.1141 | 330.8783 | 333.9905  |
| Frequencies -- | 339.3279 | 353.5820 | 360.1443  |
| Frequencies -- | 375.5029 | 378.9827 | 379.2702  |
| Frequencies -- | 379.6254 | 388.0900 | 389.9063  |
| Frequencies -- | 391.8822 | 398.4943 | 411.7235  |
| Frequencies -- | 425.4289 | 430.2105 | 432.4332  |
| Frequencies -- | 432.6741 | 433.1792 | 452.1655  |
| Frequencies -- | 453.4662 | 456.5534 | 457.6049  |
| Frequencies -- | 473.7169 | 477.4200 | 509.5484  |
| Frequencies -- | 531.1701 | 536.6085 | 541.0739  |
| Frequencies -- | 542.2586 | 547.8105 | 554.1409  |
| Frequencies -- | 555.0958 | 556.0767 | 576.9773  |
| Frequencies -- | 581.9953 | 592.2389 | 597.1034  |
| Frequencies -- | 603.8697 | 612.6132 | 630.7758  |
| Frequencies -- | 638.4765 | 638.5636 | 638.9212  |
| Frequencies -- | 641.8771 | 661.4976 | 662.9608  |
| Frequencies -- | 686.7850 | 696.4814 | 719.7211  |
| Frequencies -- | 727.3255 | 729.5472 | 736.7953  |
| Frequencies -- | 742.9329 | 757.8121 | 759.1202  |
| Frequencies -- | 770.6138 | 801.7527 | 803.7290  |
| Frequencies -- | 827.5334 | 832.2592 | 840.9679  |
| Frequencies -- | 843.5364 | 860.0230 | 869.9260  |
| Frequencies -- | 907.3798 | 907.6800 | 911.3190  |
| Frequencies -- | 924.3041 | 933.7034 | 935.1560  |
| Frequencies -- | 956.6410 | 966.2064 | 967.2096  |
| Frequencies -- | 972.3019 | 979.1243 | 1011.3390 |

|                |           |           |           |
|----------------|-----------|-----------|-----------|
| Frequencies -- | 1022.3894 | 1023.8035 | 1026.7916 |
| Frequencies -- | 1036.1939 | 1040.3296 | 1042.0170 |
| Frequencies -- | 1043.3796 | 1046.3325 | 1047.9252 |
| Frequencies -- | 1048.2563 | 1049.1329 | 1049.7775 |
| Frequencies -- | 1051.6750 | 1076.3086 | 1088.6240 |
| Frequencies -- | 1089.7223 | 1106.3009 | 1119.9946 |
| Frequencies -- | 1127.0528 | 1131.5501 | 1138.5808 |
| Frequencies -- | 1171.5578 | 1175.5307 | 1190.5832 |
| Frequencies -- | 1203.6402 | 1214.0940 | 1215.0039 |
| Frequencies -- | 1215.0404 | 1215.5760 | 1222.3964 |
| Frequencies -- | 1252.3614 | 1275.0244 | 1319.5590 |
| Frequencies -- | 1321.6068 | 1326.5051 | 1326.5494 |
| Frequencies -- | 1339.3120 | 1341.9552 | 1345.3853 |
| Frequencies -- | 1352.0809 | 1396.9864 | 1399.2729 |
| Frequencies -- | 1410.7085 | 1415.5060 | 1417.1637 |
| Frequencies -- | 1418.7842 | 1420.7527 | 1422.2516 |
| Frequencies -- | 1424.7128 | 1425.6880 | 1426.2744 |
| Frequencies -- | 1428.3141 | 1428.9808 | 1432.1697 |
| Frequencies -- | 1435.1704 | 1446.7474 | 1449.1543 |
| Frequencies -- | 1455.3977 | 1459.3417 | 1469.4473 |
| Frequencies -- | 1469.7497 | 1471.6178 | 1472.1800 |
| Frequencies -- | 1478.0172 | 1481.5865 | 1482.9979 |
| Frequencies -- | 1487.3870 | 1489.9509 | 1491.2878 |
| Frequencies -- | 1494.2677 | 1499.1573 | 1499.3137 |
| Frequencies -- | 1500.5645 | 1506.0080 | 1507.3862 |
| Frequencies -- | 1507.9793 | 1511.5517 | 1512.3025 |
| Frequencies -- | 1515.3189 | 1517.2056 | 1520.2519 |
| Frequencies -- | 1578.9627 | 1596.0941 | 1597.0430 |
| Frequencies -- | 1598.2286 | 1616.9408 | 1620.3328 |
| Frequencies -- | 1620.6778 | 1622.3697 | 2987.6655 |
| Frequencies -- | 3004.9874 | 3007.7951 | 3009.7381 |
| Frequencies -- | 3011.0754 | 3011.2026 | 3012.3362 |
| Frequencies -- | 3014.3597 | 3016.0089 | 3016.2147 |
| Frequencies -- | 3102.5213 | 3103.5230 | 3104.6324 |
| Frequencies -- | 3104.9550 | 3107.6069 | 3109.1945 |
| Frequencies -- | 3111.8272 | 3112.3567 | 3114.6821 |
| Frequencies -- | 3121.8506 | 3125.0108 | 3126.7961 |
| Frequencies -- | 3131.6633 | 3139.0578 | 3141.6381 |
| Frequencies -- | 3144.5473 | 3147.8640 | 3149.9204 |
| Frequencies -- | 3160.0169 | 3179.8095 | 3187.4508 |
| Frequencies -- | 3192.9448 | 3201.5936 | 3218.1720 |

**Catalyst 10:**

| <b>vacuum</b>  | <b>toluene-like solvent</b> | <b>D3 dispersion</b> |
|----------------|-----------------------------|----------------------|
| -3120.99058502 | -3121.001069                | -0.58557006          |

|                |          |          |          |
|----------------|----------|----------|----------|
| Frequencies -- | 6.2827   | 12.7817  | 14.0349  |
| Frequencies -- | 20.9472  | 22.2362  | 25.2243  |
| Frequencies -- | 29.7924  | 32.8217  | 35.1195  |
| Frequencies -- | 38.4545  | 42.8996  | 45.0540  |
| Frequencies -- | 48.5297  | 63.7058  | 71.1236  |
| Frequencies -- | 78.9284  | 94.8004  | 98.2104  |
| Frequencies -- | 103.4085 | 105.7295 | 107.4674 |
| Frequencies -- | 109.3608 | 115.5666 | 118.3984 |
| Frequencies -- | 119.3044 | 122.9605 | 125.1756 |
| Frequencies -- | 126.4990 | 131.5357 | 133.9748 |
| Frequencies -- | 138.7818 | 149.0804 | 152.3013 |
| Frequencies -- | 152.7921 | 157.5207 | 160.9521 |
| Frequencies -- | 161.4491 | 162.3738 | 165.0555 |
| Frequencies -- | 168.6269 | 179.1235 | 195.1921 |

|                |           |           |           |
|----------------|-----------|-----------|-----------|
| Frequencies -- | 207.4753  | 218.0482  | 218.7104  |
| Frequencies -- | 219.3618  | 220.2567  | 232.1198  |
| Frequencies -- | 241.1394  | 243.9663  | 261.1626  |
| Frequencies -- | 264.5546  | 264.7010  | 265.0914  |
| Frequencies -- | 270.0564  | 274.1564  | 278.4995  |
| Frequencies -- | 286.7455  | 289.6405  | 292.2717  |
| Frequencies -- | 295.3685  | 300.5613  | 306.1429  |
| Frequencies -- | 307.5498  | 316.2465  | 320.5073  |
| Frequencies -- | 332.2337  | 333.1349  | 338.2524  |
| Frequencies -- | 339.6855  | 347.5640  | 348.6814  |
| Frequencies -- | 355.6747  | 378.8787  | 380.3003  |
| Frequencies -- | 380.7209  | 385.8941  | 389.1894  |
| Frequencies -- | 390.3351  | 393.2271  | 411.0108  |
| Frequencies -- | 432.4955  | 432.7649  | 433.0341  |
| Frequencies -- | 452.7834  | 456.6689  | 457.3373  |
| Frequencies -- | 472.8524  | 492.3949  | 505.2550  |
| Frequencies -- | 512.4576  | 530.1112  | 535.9162  |
| Frequencies -- | 541.4876  | 542.4352  | 548.0169  |
| Frequencies -- | 550.8012  | 551.9185  | 554.5951  |
| Frequencies -- | 561.5334  | 583.2233  | 587.3620  |
| Frequencies -- | 593.1404  | 596.5852  | 600.4154  |
| Frequencies -- | 619.8883  | 630.9155  | 638.8511  |
| Frequencies -- | 640.0296  | 642.5555  | 659.8882  |
| Frequencies -- | 662.1595  | 689.0470  | 696.7554  |
| Frequencies -- | 727.7907  | 729.1987  | 738.0390  |
| Frequencies -- | 742.7112  | 745.5467  | 757.8445  |
| Frequencies -- | 758.1776  | 771.0312  | 786.4873  |
| Frequencies -- | 802.2906  | 804.3919  | 844.3278  |
| Frequencies -- | 858.6289  | 869.2767  | 907.1050  |
| Frequencies -- | 908.3017  | 910.4939  | 911.3228  |
| Frequencies -- | 922.7958  | 928.4167  | 968.8773  |
| Frequencies -- | 973.5408  | 989.2330  | 1004.2180 |
| Frequencies -- | 1013.3148 | 1022.4327 | 1025.7761 |
| Frequencies -- | 1041.0949 | 1042.8483 | 1045.6704 |
| Frequencies -- | 1047.0309 | 1048.2675 | 1049.0898 |
| Frequencies -- | 1050.1674 | 1050.4984 | 1051.8131 |
| Frequencies -- | 1054.2172 | 1058.1329 | 1075.4555 |
| Frequencies -- | 1088.5512 | 1089.5426 | 1092.1729 |
| Frequencies -- | 1110.2463 | 1126.8962 | 1148.2829 |
| Frequencies -- | 1171.4877 | 1175.1254 | 1191.7871 |
| Frequencies -- | 1193.5922 | 1200.5917 | 1214.2832 |
| Frequencies -- | 1215.5983 | 1215.8899 | 1278.5998 |
| Frequencies -- | 1281.5718 | 1319.5144 | 1320.7564 |
| Frequencies -- | 1326.0202 | 1338.1385 | 1342.0395 |
| Frequencies -- | 1342.7547 | 1360.8635 | 1411.2912 |
| Frequencies -- | 1415.9199 | 1416.8059 | 1418.1569 |
| Frequencies -- | 1418.6751 | 1421.1636 | 1422.9797 |
| Frequencies -- | 1425.9277 | 1426.4322 | 1427.3984 |
| Frequencies -- | 1428.8192 | 1429.5661 | 1434.4981 |
| Frequencies -- | 1436.7598 | 1448.0232 | 1451.2212 |
| Frequencies -- | 1455.1144 | 1461.7165 | 1469.1926 |
| Frequencies -- | 1469.4000 | 1470.7916 | 1471.5547 |
| Frequencies -- | 1472.7873 | 1473.5263 | 1481.3669 |
| Frequencies -- | 1489.7734 | 1490.2679 | 1492.3142 |
| Frequencies -- | 1495.6788 | 1498.7733 | 1500.6840 |
| Frequencies -- | 1505.2975 | 1506.0361 | 1507.8509 |
| Frequencies -- | 1508.4551 | 1513.6110 | 1515.4027 |
| Frequencies -- | 1519.3575 | 1595.5550 | 1596.8560 |
| Frequencies -- | 1597.3997 | 1604.4879 | 1607.4560 |
| Frequencies -- | 1619.9025 | 1620.5217 | 1622.1434 |
| Frequencies -- | 2995.7360 | 3008.4839 | 3011.2991 |
| Frequencies -- | 3012.3642 | 3013.3813 | 3015.7735 |
| Frequencies -- | 3016.5434 | 3026.5733 | 3034.8366 |

|                |           |           |           |
|----------------|-----------|-----------|-----------|
| Frequencies -- | 3101.8487 | 3104.0466 | 3105.9420 |
| Frequencies -- | 3110.4269 | 3111.3292 | 3112.6156 |
| Frequencies -- | 3116.2580 | 3124.5778 | 3135.0467 |
| Frequencies -- | 3141.1125 | 3142.9807 | 3145.3980 |
| Frequencies -- | 3147.2822 | 3149.6892 | 3151.1063 |
| Frequencies -- | 3152.8067 | 3163.3924 | 3164.7664 |
| Frequencies -- | 3174.6347 | 3175.5200 | 3196.2041 |

**Catalyst 11:**

| <b>vacuum</b>  | <b>toluene-like solvent</b> | <b>D3 dispersion</b> |
|----------------|-----------------------------|----------------------|
| -3199.56485611 | -3199.574155                | -0.62184451          |

|                |          |          |          |
|----------------|----------|----------|----------|
| Frequencies -- | 10.0338  | 12.2064  | 14.6136  |
| Frequencies -- | 19.2370  | 21.5338  | 24.1837  |
| Frequencies -- | 28.9116  | 31.7619  | 32.9343  |
| Frequencies -- | 39.2698  | 39.9345  | 44.6208  |
| Frequencies -- | 46.0954  | 54.8471  | 62.0576  |
| Frequencies -- | 69.8017  | 72.3200  | 83.7404  |
| Frequencies -- | 99.1206  | 105.3826 | 106.0007 |
| Frequencies -- | 108.4758 | 118.3235 | 119.1310 |
| Frequencies -- | 120.6541 | 121.7977 | 126.7837 |
| Frequencies -- | 134.7153 | 139.2799 | 142.0112 |
| Frequencies -- | 151.6726 | 153.2933 | 156.4316 |
| Frequencies -- | 157.4170 | 160.4586 | 161.3490 |
| Frequencies -- | 162.4973 | 163.4297 | 166.9484 |
| Frequencies -- | 172.7400 | 177.3285 | 185.5545 |
| Frequencies -- | 191.7057 | 196.4584 | 213.3958 |
| Frequencies -- | 216.5915 | 218.3283 | 219.5089 |
| Frequencies -- | 229.3377 | 243.4358 | 263.4707 |
| Frequencies -- | 264.4103 | 264.8193 | 265.0679 |
| Frequencies -- | 269.6992 | 271.1522 | 274.4541 |
| Frequencies -- | 282.5533 | 284.1862 | 286.8106 |
| Frequencies -- | 287.7099 | 291.3932 | 292.1568 |
| Frequencies -- | 295.4165 | 299.1571 | 299.9088 |
| Frequencies -- | 309.1471 | 315.0887 | 318.6126 |
| Frequencies -- | 322.1322 | 328.5794 | 331.9873 |
| Frequencies -- | 335.1178 | 341.9792 | 349.0410 |
| Frequencies -- | 355.1642 | 369.8333 | 378.6345 |
| Frequencies -- | 379.9576 | 380.3973 | 384.3203 |
| Frequencies -- | 388.0993 | 391.1489 | 395.6694 |
| Frequencies -- | 412.5665 | 432.2590 | 433.2535 |
| Frequencies -- | 433.3521 | 451.9745 | 456.4899 |
| Frequencies -- | 457.5456 | 472.5567 | 500.7574 |
| Frequencies -- | 505.3968 | 529.9107 | 534.1866 |
| Frequencies -- | 535.7510 | 541.5396 | 542.4235 |
| Frequencies -- | 548.1176 | 549.5461 | 553.9318 |
| Frequencies -- | 572.7906 | 583.2601 | 586.8651 |
| Frequencies -- | 592.6106 | 595.9996 | 597.0728 |
| Frequencies -- | 604.1635 | 617.6195 | 630.2591 |
| Frequencies -- | 638.4486 | 639.5480 | 642.2337 |
| Frequencies -- | 659.2007 | 661.4600 | 682.6635 |
| Frequencies -- | 696.5122 | 714.2095 | 727.4230 |
| Frequencies -- | 729.3393 | 733.8869 | 742.0165 |
| Frequencies -- | 756.0792 | 758.1961 | 770.6409 |
| Frequencies -- | 771.4690 | 789.0221 | 800.4279 |
| Frequencies -- | 803.2527 | 827.8763 | 842.6928 |
| Frequencies -- | 853.9875 | 861.1539 | 865.6508 |
| Frequencies -- | 907.2331 | 908.4087 | 911.3302 |
| Frequencies -- | 921.4797 | 928.8824 | 966.5386 |
| Frequencies -- | 972.1611 | 992.7765 | 995.4323 |

|                |           |           |           |
|----------------|-----------|-----------|-----------|
| Frequencies -- | 1017.9558 | 1022.0787 | 1024.8267 |
| Frequencies -- | 1027.7508 | 1042.3353 | 1043.7179 |
| Frequencies -- | 1046.2874 | 1048.0554 | 1049.3697 |
| Frequencies -- | 1049.8115 | 1051.3872 | 1051.8549 |
| Frequencies -- | 1057.5096 | 1083.2184 | 1087.5505 |
| Frequencies -- | 1089.9359 | 1090.4447 | 1092.3934 |
| Frequencies -- | 1097.9131 | 1101.0333 | 1124.3167 |
| Frequencies -- | 1126.2364 | 1139.8700 | 1171.6034 |
| Frequencies -- | 1176.0170 | 1185.1526 | 1190.3959 |
| Frequencies -- | 1204.9476 | 1214.2571 | 1215.0441 |
| Frequencies -- | 1215.7319 | 1260.1042 | 1276.1872 |
| Frequencies -- | 1289.3601 | 1292.2444 | 1318.7112 |
| Frequencies -- | 1320.7662 | 1325.8976 | 1326.6933 |
| Frequencies -- | 1338.3086 | 1341.4751 | 1343.6326 |
| Frequencies -- | 1344.8517 | 1382.5964 | 1410.2032 |
| Frequencies -- | 1414.2749 | 1415.6705 | 1416.3098 |
| Frequencies -- | 1417.1123 | 1417.8956 | 1419.4194 |
| Frequencies -- | 1424.8018 | 1427.6881 | 1428.4702 |
| Frequencies -- | 1431.7073 | 1434.2925 | 1434.7383 |
| Frequencies -- | 1436.6046 | 1447.8660 | 1450.7033 |
| Frequencies -- | 1456.4456 | 1461.4666 | 1469.1518 |
| Frequencies -- | 1470.0910 | 1471.1396 | 1471.9174 |
| Frequencies -- | 1474.0333 | 1477.2814 | 1482.5674 |
| Frequencies -- | 1486.7734 | 1492.2495 | 1494.6539 |
| Frequencies -- | 1497.4510 | 1499.7285 | 1500.8574 |
| Frequencies -- | 1501.1054 | 1501.3181 | 1507.6327 |
| Frequencies -- | 1508.6259 | 1509.5689 | 1512.3137 |
| Frequencies -- | 1513.9116 | 1516.3832 | 1517.2930 |
| Frequencies -- | 1595.6874 | 1597.1184 | 1597.1548 |
| Frequencies -- | 1600.3302 | 1609.1507 | 1619.9308 |
| Frequencies -- | 1620.8055 | 1622.4197 | 2997.0118 |
| Frequencies -- | 3011.3143 | 3011.5327 | 3012.3114 |
| Frequencies -- | 3012.6997 | 3014.2697 | 3014.9009 |
| Frequencies -- | 3015.4342 | 3015.9500 | 3027.0848 |
| Frequencies -- | 3034.8824 | 3072.8767 | 3095.1209 |
| Frequencies -- | 3103.3120 | 3104.0701 | 3105.4001 |
| Frequencies -- | 3107.1655 | 3112.9543 | 3113.4684 |
| Frequencies -- | 3113.9629 | 3119.5526 | 3121.0147 |
| Frequencies -- | 3126.2921 | 3141.5479 | 3146.5232 |
| Frequencies -- | 3147.9694 | 3148.9003 | 3151.4924 |
| Frequencies -- | 3152.6115 | 3161.7179 | 3171.3361 |
| Frequencies -- | 3183.0426 | 3204.8644 | 3213.6514 |

**Catalyst 12:**

| <b>vacuum</b>  | <b>toluene-like solvent</b> | <b>D3 dispersion</b> |
|----------------|-----------------------------|----------------------|
| -3278.13941821 | -3278.149362                | -0.66207898          |

|                |          |          |          |
|----------------|----------|----------|----------|
| Frequencies -- | 5.5866   | 13.4200  | 14.6747  |
| Frequencies -- | 20.7586  | 23.9775  | 26.2375  |
| Frequencies -- | 27.8969  | 30.6806  | 34.5887  |
| Frequencies -- | 36.9730  | 40.5838  | 45.0541  |
| Frequencies -- | 50.1256  | 56.1555  | 59.8539  |
| Frequencies -- | 62.5110  | 69.3475  | 78.7726  |
| Frequencies -- | 81.3793  | 85.2770  | 95.4297  |
| Frequencies -- | 101.6638 | 107.0485 | 108.3387 |
| Frequencies -- | 117.2425 | 119.2415 | 119.7374 |
| Frequencies -- | 121.0487 | 128.5344 | 130.3408 |
| Frequencies -- | 130.5002 | 138.8265 | 142.6186 |
| Frequencies -- | 147.6043 | 153.8823 | 155.1460 |
| Frequencies -- | 156.9632 | 158.2870 | 160.5094 |

|                |           |           |           |
|----------------|-----------|-----------|-----------|
| Frequencies -- | 163.2301  | 165.9403  | 171.5879  |
| Frequencies -- | 172.4263  | 185.3891  | 200.4960  |
| Frequencies -- | 215.6321  | 216.8162  | 221.0752  |
| Frequencies -- | 223.7156  | 224.4480  | 229.2454  |
| Frequencies -- | 245.5015  | 250.1619  | 257.0789  |
| Frequencies -- | 263.2966  | 264.2744  | 264.4115  |
| Frequencies -- | 264.7963  | 265.6253  | 272.5465  |
| Frequencies -- | 274.5859  | 278.6696  | 281.3564  |
| Frequencies -- | 284.3790  | 286.8931  | 289.9730  |
| Frequencies -- | 294.7457  | 296.5776  | 299.7389  |
| Frequencies -- | 300.9902  | 302.9305  | 307.4596  |
| Frequencies -- | 317.2692  | 319.9265  | 323.2955  |
| Frequencies -- | 328.8820  | 334.5396  | 335.8752  |
| Frequencies -- | 336.4594  | 354.9921  | 369.4841  |
| Frequencies -- | 377.3407  | 378.2033  | 379.6613  |
| Frequencies -- | 382.0904  | 395.9974  | 397.6107  |
| Frequencies -- | 412.3512  | 425.1634  | 428.7909  |
| Frequencies -- | 432.3888  | 432.8629  | 433.8554  |
| Frequencies -- | 442.0606  | 445.3891  | 456.4445  |
| Frequencies -- | 457.4969  | 471.7240  | 506.4539  |
| Frequencies -- | 529.8195  | 535.2553  | 537.0554  |
| Frequencies -- | 541.2088  | 542.7809  | 547.2846  |
| Frequencies -- | 548.7031  | 552.6949  | 583.3759  |
| Frequencies -- | 585.3883  | 588.2504  | 594.4455  |
| Frequencies -- | 597.3238  | 600.2707  | 608.6970  |
| Frequencies -- | 612.9454  | 629.7089  | 630.4871  |
| Frequencies -- | 637.1605  | 638.1516  | 641.1262  |
| Frequencies -- | 654.0339  | 666.7531  | 689.1844  |
| Frequencies -- | 697.7146  | 721.8161  | 727.4408  |
| Frequencies -- | 729.6191  | 739.9910  | 752.2003  |
| Frequencies -- | 761.3902  | 764.7002  | 768.9991  |
| Frequencies -- | 797.2365  | 801.1607  | 801.7170  |
| Frequencies -- | 816.7100  | 843.8299  | 849.7375  |
| Frequencies -- | 873.6747  | 877.8478  | 904.1033  |
| Frequencies -- | 910.3228  | 911.3189  | 923.5766  |
| Frequencies -- | 928.2958  | 931.4453  | 934.5764  |
| Frequencies -- | 942.8273  | 963.7124  | 965.2186  |
| Frequencies -- | 967.3258  | 969.0071  | 992.7589  |
| Frequencies -- | 1011.7554 | 1021.7181 | 1025.7737 |
| Frequencies -- | 1038.7515 | 1040.6327 | 1042.9209 |
| Frequencies -- | 1046.9068 | 1046.9331 | 1048.5912 |
| Frequencies -- | 1050.3115 | 1052.4689 | 1055.4489 |
| Frequencies -- | 1070.1826 | 1072.9285 | 1086.4823 |
| Frequencies -- | 1088.7189 | 1095.2006 | 1110.7662 |
| Frequencies -- | 1116.6376 | 1120.0462 | 1124.7521 |
| Frequencies -- | 1151.0126 | 1166.0407 | 1172.2813 |
| Frequencies -- | 1175.3057 | 1182.6328 | 1184.3104 |
| Frequencies -- | 1195.2532 | 1205.3848 | 1213.4946 |
| Frequencies -- | 1214.3953 | 1215.5857 | 1254.8190 |
| Frequencies -- | 1276.8673 | 1306.1660 | 1318.0276 |
| Frequencies -- | 1321.0177 | 1322.0920 | 1325.8486 |
| Frequencies -- | 1330.1364 | 1338.7013 | 1339.4104 |
| Frequencies -- | 1340.6787 | 1346.2684 | 1382.5358 |
| Frequencies -- | 1402.4994 | 1403.1227 | 1409.5359 |
| Frequencies -- | 1414.6420 | 1415.8804 | 1417.6557 |
| Frequencies -- | 1420.1398 | 1420.9860 | 1422.1448 |
| Frequencies -- | 1424.6295 | 1426.8928 | 1428.1904 |
| Frequencies -- | 1429.8420 | 1434.2199 | 1436.1205 |
| Frequencies -- | 1444.4974 | 1448.0702 | 1448.9138 |
| Frequencies -- | 1454.9514 | 1461.0059 | 1468.6669 |
| Frequencies -- | 1469.1931 | 1471.4737 | 1474.4112 |
| Frequencies -- | 1477.0056 | 1480.0183 | 1483.7766 |
| Frequencies -- | 1487.2253 | 1489.3758 | 1489.9097 |

|                |           |           |           |
|----------------|-----------|-----------|-----------|
| Frequencies -- | 1491.9098 | 1492.4499 | 1494.5682 |
| Frequencies -- | 1497.6864 | 1500.5125 | 1503.2482 |
| Frequencies -- | 1504.0882 | 1506.4549 | 1507.6017 |
| Frequencies -- | 1509.3685 | 1510.5275 | 1511.9459 |
| Frequencies -- | 1514.6959 | 1516.3561 | 1595.6124 |
| Frequencies -- | 1595.6863 | 1596.6527 | 1597.3578 |
| Frequencies -- | 1605.5154 | 1619.4917 | 1620.1640 |
| Frequencies -- | 1621.8977 | 3000.5844 | 3007.8537 |
| Frequencies -- | 3008.1657 | 3011.0893 | 3011.7786 |
| Frequencies -- | 3012.4099 | 3012.7543 | 3013.1078 |
| Frequencies -- | 3015.2309 | 3016.3986 | 3019.6387 |
| Frequencies -- | 3069.6390 | 3103.0682 | 3104.5177 |
| Frequencies -- | 3105.0905 | 3106.3809 | 3110.2776 |
| Frequencies -- | 3110.8865 | 3112.5744 | 3112.9980 |
| Frequencies -- | 3113.5555 | 3119.6850 | 3121.8340 |
| Frequencies -- | 3123.8438 | 3126.5735 | 3133.3307 |
| Frequencies -- | 3138.5668 | 3142.6704 | 3145.2306 |
| Frequencies -- | 3146.9964 | 3150.3970 | 3154.4699 |
| Frequencies -- | 3158.3527 | 3161.6482 | 3167.1164 |
| Frequencies -- | 3187.5062 | 3189.7708 | 3202.0212 |

**Catalyst 13:****distal conformation**

| <b>vacuum</b> | <b>toluene-like solvent</b> | <b>D3 dispersion</b> |
|---------------|-----------------------------|----------------------|
| -3276.9466281 | -3276.9570253               | -0.65225182          |

|                |          |          |          |
|----------------|----------|----------|----------|
| Frequencies -- | 8.1042   | 12.1449  | 16.2281  |
| Frequencies -- | 20.9566  | 23.0065  | 26.1409  |
| Frequencies -- | 28.6386  | 29.1718  | 33.1764  |
| Frequencies -- | 38.7392  | 41.8370  | 43.1375  |
| Frequencies -- | 46.5418  | 56.8998  | 67.1601  |
| Frequencies -- | 68.8333  | 83.1074  | 85.8353  |
| Frequencies -- | 102.0291 | 103.4419 | 106.5231 |
| Frequencies -- | 108.5488 | 111.8124 | 114.9845 |
| Frequencies -- | 118.0476 | 119.4577 | 123.3792 |
| Frequencies -- | 124.8694 | 127.4467 | 137.9021 |
| Frequencies -- | 139.7776 | 145.5513 | 146.5987 |
| Frequencies -- | 149.4379 | 153.6436 | 153.9666 |
| Frequencies -- | 157.3940 | 159.9626 | 162.1432 |
| Frequencies -- | 164.9766 | 169.1541 | 178.7886 |
| Frequencies -- | 200.8586 | 212.0856 | 215.7828 |
| Frequencies -- | 217.2263 | 219.7879 | 232.5422 |
| Frequencies -- | 235.2546 | 251.4135 | 262.1989 |
| Frequencies -- | 263.9478 | 264.7658 | 265.3792 |
| Frequencies -- | 266.8084 | 270.6709 | 273.4949 |
| Frequencies -- | 280.9985 | 283.4003 | 284.3243 |
| Frequencies -- | 290.7419 | 291.6856 | 292.7186 |
| Frequencies -- | 298.8128 | 302.4324 | 309.1846 |
| Frequencies -- | 310.4468 | 315.4314 | 320.0846 |
| Frequencies -- | 329.8090 | 334.3679 | 336.2485 |
| Frequencies -- | 339.5583 | 349.3918 | 359.1479 |
| Frequencies -- | 378.3010 | 378.6402 | 380.7260 |
| Frequencies -- | 383.0550 | 384.6990 | 392.1827 |
| Frequencies -- | 394.3298 | 416.2180 | 432.0744 |
| Frequencies -- | 432.6650 | 433.3459 | 437.6725 |
| Frequencies -- | 443.1476 | 450.9059 | 456.0695 |
| Frequencies -- | 457.7758 | 472.9727 | 495.0182 |
| Frequencies -- | 500.3325 | 506.5214 | 520.0793 |

|                |           |           |           |
|----------------|-----------|-----------|-----------|
| Frequencies -- | 530.0301  | 536.2864  | 541.1174  |
| Frequencies -- | 542.4570  | 548.2413  | 553.9351  |
| Frequencies -- | 555.2813  | 578.9336  | 583.6863  |
| Frequencies -- | 590.4799  | 595.6292  | 604.0101  |
| Frequencies -- | 615.0996  | 618.5548  | 630.6316  |
| Frequencies -- | 637.8658  | 639.0019  | 641.9268  |
| Frequencies -- | 658.4304  | 662.6679  | 664.1545  |
| Frequencies -- | 695.4962  | 703.3394  | 724.5535  |
| Frequencies -- | 729.2825  | 742.0471  | 742.1552  |
| Frequencies -- | 755.6947  | 760.1448  | 767.3258  |
| Frequencies -- | 769.3465  | 770.0246  | 793.7088  |
| Frequencies -- | 802.3980  | 803.4774  | 820.6765  |
| Frequencies -- | 841.9275  | 859.7308  | 862.6877  |
| Frequencies -- | 866.4029  | 867.7338  | 889.1737  |
| Frequencies -- | 902.3308  | 905.6972  | 908.1124  |
| Frequencies -- | 910.6661  | 926.8087  | 937.3239  |
| Frequencies -- | 959.4461  | 968.0514  | 972.8935  |
| Frequencies -- | 995.5781  | 999.3092  | 1008.0765 |
| Frequencies -- | 1021.2557 | 1024.4060 | 1041.6222 |
| Frequencies -- | 1042.6763 | 1046.0701 | 1047.4299 |
| Frequencies -- | 1047.6108 | 1048.6620 | 1049.7404 |
| Frequencies -- | 1051.6100 | 1052.5276 | 1055.7517 |
| Frequencies -- | 1058.2618 | 1074.2326 | 1087.3657 |
| Frequencies -- | 1088.5129 | 1088.9579 | 1090.6458 |
| Frequencies -- | 1096.2336 | 1115.2557 | 1127.0440 |
| Frequencies -- | 1138.8763 | 1153.2542 | 1172.3921 |
| Frequencies -- | 1175.7222 | 1182.5980 | 1193.1520 |
| Frequencies -- | 1194.1643 | 1199.3704 | 1214.0954 |
| Frequencies -- | 1214.3909 | 1215.6341 | 1219.3362 |
| Frequencies -- | 1251.7558 | 1279.0282 | 1281.5664 |
| Frequencies -- | 1296.8626 | 1318.4777 | 1319.8829 |
| Frequencies -- | 1322.5167 | 1326.9027 | 1328.6696 |
| Frequencies -- | 1338.8205 | 1340.9697 | 1346.0095 |
| Frequencies -- | 1352.5225 | 1358.3003 | 1361.2632 |
| Frequencies -- | 1363.6895 | 1371.1594 | 1387.7216 |
| Frequencies -- | 1411.1335 | 1416.3189 | 1416.3971 |
| Frequencies -- | 1417.5688 | 1420.0438 | 1425.4205 |
| Frequencies -- | 1426.0651 | 1428.5572 | 1430.4336 |
| Frequencies -- | 1433.7288 | 1436.4678 | 1446.0165 |
| Frequencies -- | 1447.7174 | 1450.0132 | 1455.4135 |
| Frequencies -- | 1459.5309 | 1468.8967 | 1469.5999 |
| Frequencies -- | 1470.7274 | 1471.8147 | 1479.4413 |
| Frequencies -- | 1481.3970 | 1482.1735 | 1483.3400 |
| Frequencies -- | 1485.2520 | 1487.2270 | 1491.9674 |
| Frequencies -- | 1493.7134 | 1495.2651 | 1498.3763 |
| Frequencies -- | 1499.8798 | 1501.1211 | 1506.6931 |
| Frequencies -- | 1507.9945 | 1512.1766 | 1517.3699 |
| Frequencies -- | 1517.8364 | 1585.5196 | 1595.5738 |
| Frequencies -- | 1596.6007 | 1597.2547 | 1614.2185 |
| Frequencies -- | 1620.1689 | 1620.5133 | 1622.3026 |
| Frequencies -- | 2989.9769 | 3002.6811 | 3003.1256 |
| Frequencies -- | 3005.1548 | 3010.7436 | 3011.4930 |
| Frequencies -- | 3012.3264 | 3013.9635 | 3015.3460 |
| Frequencies -- | 3017.0809 | 3017.2019 | 3024.5470 |
| Frequencies -- | 3058.5436 | 3064.0698 | 3070.7058 |
| Frequencies -- | 3080.7560 | 3082.0321 | 3098.4193 |
| Frequencies -- | 3103.0679 | 3104.3313 | 3105.1291 |
| Frequencies -- | 3107.2909 | 3109.0001 | 3117.0339 |
| Frequencies -- | 3136.5168 | 3140.0446 | 3143.0445 |
| Frequencies -- | 3147.4700 | 3152.6505 | 3154.8281 |
| Frequencies -- | 3166.5035 | 3166.5323 | 3175.8392 |
| Frequencies -- | 3180.6894 | 3196.6464 | 3213.7415 |



**proximal conformation**

| <b>vacuum</b> | <b>toluene-like solvent</b> | <b>D3 dispersion</b> |
|---------------|-----------------------------|----------------------|
| -3276.9488587 | -3276.9596011               | -0.64966142          |

|                |           |           |           |
|----------------|-----------|-----------|-----------|
| Frequencies -- | 4.0307    | 11.0094   | 14.2296   |
| Frequencies -- | 18.9944   | 21.7009   | 23.0359   |
| Frequencies -- | 26.0669   | 29.0656   | 30.2903   |
| Frequencies -- | 34.4725   | 37.2518   | 39.9584   |
| Frequencies -- | 41.8494   | 45.0838   | 57.7191   |
| Frequencies -- | 69.0567   | 85.9939   | 91.1374   |
| Frequencies -- | 102.5787  | 104.0534  | 105.3140  |
| Frequencies -- | 106.2761  | 112.0276  | 116.7772  |
| Frequencies -- | 118.0650  | 119.1016  | 121.3751  |
| Frequencies -- | 124.2828  | 130.1947  | 132.9600  |
| Frequencies -- | 137.1538  | 142.7875  | 149.5131  |
| Frequencies -- | 151.7623  | 153.4304  | 157.3234  |
| Frequencies -- | 160.4633  | 161.4977  | 162.8452  |
| Frequencies -- | 164.0806  | 169.3918  | 185.9681  |
| Frequencies -- | 202.8226  | 206.3506  | 210.6850  |
| Frequencies -- | 217.1805  | 218.4141  | 222.0151  |
| Frequencies -- | 223.4752  | 239.6336  | 257.5958  |
| Frequencies -- | 260.4410  | 264.5832  | 264.8380  |
| Frequencies -- | 265.1487  | 269.1178  | 273.2264  |
| Frequencies -- | 279.8099  | 280.7102  | 285.7193  |
| Frequencies -- | 288.6562  | 292.2665  | 294.0078  |
| Frequencies -- | 299.9749  | 302.3898  | 308.5612  |
| Frequencies -- | 312.5700  | 314.6700  | 320.7099  |
| Frequencies -- | 330.9900  | 333.7784  | 339.1347  |
| Frequencies -- | 342.3815  | 351.2648  | 357.3314  |
| Frequencies -- | 378.5592  | 379.2283  | 379.5474  |
| Frequencies -- | 384.4753  | 388.8522  | 389.7633  |
| Frequencies -- | 392.8683  | 415.2860  | 432.4157  |
| Frequencies -- | 432.7639  | 433.3543  | 438.0161  |
| Frequencies -- | 443.0355  | 452.1082  | 456.0559  |
| Frequencies -- | 457.5890  | 472.8754  | 494.9248  |
| Frequencies -- | 495.7246  | 506.5498  | 523.1018  |
| Frequencies -- | 530.1936  | 536.6953  | 541.0657  |
| Frequencies -- | 542.6033  | 548.0760  | 554.1746  |
| Frequencies -- | 555.7283  | 580.8072  | 583.2394  |
| Frequencies -- | 591.3000  | 596.6971  | 605.3816  |
| Frequencies -- | 612.3065  | 617.1889  | 630.4311  |
| Frequencies -- | 638.4780  | 638.9700  | 641.7192  |
| Frequencies -- | 658.6341  | 660.3617  | 662.8059  |
| Frequencies -- | 695.0236  | 701.8092  | 727.0823  |
| Frequencies -- | 728.6551  | 742.4127  | 744.3666  |
| Frequencies -- | 757.4232  | 758.1427  | 768.4040  |
| Frequencies -- | 770.4260  | 770.8489  | 789.4518  |
| Frequencies -- | 801.1423  | 803.2884  | 820.6862  |
| Frequencies -- | 842.6489  | 853.9967  | 867.0769  |
| Frequencies -- | 867.8893  | 874.0384  | 890.4255  |
| Frequencies -- | 901.7340  | 906.8288  | 907.4266  |
| Frequencies -- | 910.3825  | 924.7887  | 938.2797  |
| Frequencies -- | 964.6495  | 967.7560  | 972.5025  |
| Frequencies -- | 996.5020  | 997.7039  | 1005.2404 |
| Frequencies -- | 1023.5174 | 1024.5564 | 1042.1046 |
| Frequencies -- | 1043.5311 | 1046.2926 | 1046.7818 |
| Frequencies -- | 1047.3714 | 1048.6468 | 1048.9905 |
| Frequencies -- | 1050.8820 | 1052.5618 | 1055.0324 |
| Frequencies -- | 1057.7086 | 1071.5181 | 1085.8657 |
| Frequencies -- | 1088.8099 | 1089.8446 | 1095.5980 |

|                |           |           |           |
|----------------|-----------|-----------|-----------|
| Frequencies -- | 1097.2957 | 1115.3752 | 1126.8729 |
| Frequencies -- | 1132.1455 | 1152.8631 | 1171.2390 |
| Frequencies -- | 1175.6899 | 1184.1451 | 1191.8754 |
| Frequencies -- | 1192.0876 | 1199.1596 | 1213.7736 |
| Frequencies -- | 1214.7131 | 1215.1448 | 1221.9834 |
| Frequencies -- | 1248.4219 | 1277.8197 | 1282.7809 |
| Frequencies -- | 1293.1755 | 1317.2010 | 1319.1139 |
| Frequencies -- | 1321.0430 | 1326.1793 | 1329.3717 |
| Frequencies -- | 1338.9210 | 1341.7484 | 1344.3766 |
| Frequencies -- | 1351.8613 | 1354.2902 | 1359.9875 |
| Frequencies -- | 1361.1722 | 1370.7620 | 1388.9045 |
| Frequencies -- | 1410.2828 | 1415.0524 | 1416.7975 |
| Frequencies -- | 1417.8155 | 1418.9463 | 1424.8814 |
| Frequencies -- | 1425.5580 | 1427.6997 | 1429.5012 |
| Frequencies -- | 1432.2142 | 1435.4134 | 1445.4385 |
| Frequencies -- | 1446.8074 | 1447.5970 | 1454.7830 |
| Frequencies -- | 1459.3970 | 1465.8971 | 1469.3920 |
| Frequencies -- | 1469.7781 | 1471.7576 | 1477.4470 |
| Frequencies -- | 1478.9907 | 1481.1549 | 1481.8839 |
| Frequencies -- | 1484.1460 | 1484.7349 | 1488.2720 |
| Frequencies -- | 1492.2783 | 1495.8124 | 1496.7522 |
| Frequencies -- | 1499.0821 | 1500.5083 | 1506.7646 |
| Frequencies -- | 1507.3827 | 1512.4699 | 1516.5417 |
| Frequencies -- | 1517.1888 | 1586.0936 | 1595.7951 |
| Frequencies -- | 1596.9496 | 1597.3361 | 1612.0482 |
| Frequencies -- | 1620.3034 | 1620.6818 | 1622.4137 |
| Frequencies -- | 2991.2089 | 2994.3854 | 3002.3229 |
| Frequencies -- | 3004.6286 | 3005.3615 | 3010.8512 |
| Frequencies -- | 3011.1164 | 3011.8495 | 3013.0938 |
| Frequencies -- | 3013.9662 | 3015.6948 | 3021.7148 |
| Frequencies -- | 3059.2688 | 3064.0760 | 3068.9601 |
| Frequencies -- | 3076.6758 | 3082.2262 | 3100.6377 |
| Frequencies -- | 3102.0554 | 3103.9541 | 3105.2247 |
| Frequencies -- | 3106.4397 | 3111.1109 | 3112.0365 |
| Frequencies -- | 3135.8411 | 3139.0103 | 3141.8539 |
| Frequencies -- | 3145.5446 | 3148.3553 | 3150.6399 |
| Frequencies -- | 3159.1170 | 3168.0692 | 3181.6756 |
| Frequencies -- | 3196.7372 | 3198.0797 | 3215.8189 |

**Catalyst 14:**

| <b>vacuum</b>  | <b>toluene-like solvent</b> | <b>D3 dispersion</b> |
|----------------|-----------------------------|----------------------|
| -3133.54961423 | -3133.560332                | -0.59429348          |

|                |          |          |          |
|----------------|----------|----------|----------|
| Frequencies -- | 4.8773   | 8.7103   | 10.1140  |
| Frequencies -- | 16.2606  | 20.6107  | 24.2991  |
| Frequencies -- | 26.5309  | 30.8642  | 32.6743  |
| Frequencies -- | 35.7097  | 40.9953  | 43.7722  |
| Frequencies -- | 46.8762  | 65.4322  | 69.7809  |
| Frequencies -- | 84.4179  | 89.3346  | 94.6231  |
| Frequencies -- | 100.9592 | 105.0500 | 105.9463 |
| Frequencies -- | 106.5145 | 116.4937 | 118.0747 |
| Frequencies -- | 118.7522 | 122.1203 | 123.8344 |
| Frequencies -- | 127.7595 | 136.4381 | 137.8099 |
| Frequencies -- | 144.6584 | 146.7696 | 152.0860 |
| Frequencies -- | 153.0667 | 154.7848 | 156.1050 |
| Frequencies -- | 157.3438 | 160.8974 | 161.2902 |
| Frequencies -- | 164.1930 | 168.5860 | 177.9024 |
| Frequencies -- | 187.8014 | 195.8648 | 211.0693 |
| Frequencies -- | 216.8012 | 218.9062 | 220.8070 |
| Frequencies -- | 222.7602 | 233.9498 | 245.7109 |

|                |           |           |           |
|----------------|-----------|-----------|-----------|
| Frequencies -- | 251.7248  | 253.3587  | 264.2788  |
| Frequencies -- | 264.6316  | 264.8009  | 265.2071  |
| Frequencies -- | 270.1456  | 273.9727  | 279.4171  |
| Frequencies -- | 285.9712  | 289.7049  | 290.6055  |
| Frequencies -- | 295.7467  | 299.1932  | 301.9825  |
| Frequencies -- | 308.1467  | 315.4024  | 322.0196  |
| Frequencies -- | 331.5104  | 334.4994  | 340.7913  |
| Frequencies -- | 348.8238  | 357.3778  | 359.8856  |
| Frequencies -- | 378.8670  | 379.5826  | 380.2402  |
| Frequencies -- | 385.6848  | 389.1237  | 389.9246  |
| Frequencies -- | 397.1459  | 403.2595  | 429.5907  |
| Frequencies -- | 432.0454  | 432.7260  | 433.0625  |
| Frequencies -- | 452.0612  | 456.5142  | 457.2972  |
| Frequencies -- | 472.5462  | 500.8220  | 503.5873  |
| Frequencies -- | 510.3429  | 529.8877  | 536.0215  |
| Frequencies -- | 541.1205  | 542.1528  | 547.8043  |
| Frequencies -- | 554.5435  | 561.9939  | 566.6600  |
| Frequencies -- | 573.1959  | 583.1885  | 586.4379  |
| Frequencies -- | 592.2235  | 596.9752  | 598.1057  |
| Frequencies -- | 616.7984  | 630.4472  | 638.8244  |
| Frequencies -- | 639.1787  | 642.0530  | 658.8649  |
| Frequencies -- | 662.9067  | 689.9375  | 695.7600  |
| Frequencies -- | 727.2255  | 729.2853  | 732.6153  |
| Frequencies -- | 742.0870  | 756.9001  | 758.5316  |
| Frequencies -- | 770.6224  | 799.5543  | 801.7902  |
| Frequencies -- | 804.6471  | 841.4786  | 858.0535  |
| Frequencies -- | 869.0215  | 885.5282  | 891.0054  |
| Frequencies -- | 906.9140  | 907.7173  | 911.6218  |
| Frequencies -- | 926.3706  | 951.1863  | 966.3024  |
| Frequencies -- | 973.2266  | 1011.9143 | 1013.4941 |
| Frequencies -- | 1022.4872 | 1025.1884 | 1040.0808 |
| Frequencies -- | 1041.4795 | 1045.6522 | 1046.1748 |
| Frequencies -- | 1047.3900 | 1049.1848 | 1050.0189 |
| Frequencies -- | 1051.5062 | 1051.7824 | 1053.8890 |
| Frequencies -- | 1058.7676 | 1077.1770 | 1087.6193 |
| Frequencies -- | 1088.3769 | 1089.5123 | 1124.9430 |
| Frequencies -- | 1125.9370 | 1134.7427 | 1171.1119 |
| Frequencies -- | 1175.2411 | 1191.4335 | 1207.4262 |
| Frequencies -- | 1214.4249 | 1215.5385 | 1216.0096 |
| Frequencies -- | 1265.4622 | 1287.2744 | 1319.3062 |
| Frequencies -- | 1320.3718 | 1325.6921 | 1337.8808 |
| Frequencies -- | 1341.7306 | 1343.0343 | 1354.1933 |
| Frequencies -- | 1409.3694 | 1414.0604 | 1416.0592 |
| Frequencies -- | 1416.6206 | 1417.6821 | 1418.2175 |
| Frequencies -- | 1422.9059 | 1424.8694 | 1426.1401 |
| Frequencies -- | 1426.9959 | 1428.1747 | 1428.9724 |
| Frequencies -- | 1429.5637 | 1434.7584 | 1437.4495 |
| Frequencies -- | 1447.7964 | 1451.3924 | 1455.6543 |
| Frequencies -- | 1461.7207 | 1465.5331 | 1469.1389 |
| Frequencies -- | 1469.8620 | 1470.7749 | 1471.7953 |
| Frequencies -- | 1481.2255 | 1489.6472 | 1490.4434 |
| Frequencies -- | 1491.6575 | 1495.5998 | 1499.1112 |
| Frequencies -- | 1501.3257 | 1503.5370 | 1505.1694 |
| Frequencies -- | 1506.9001 | 1507.4179 | 1512.5545 |
| Frequencies -- | 1516.5349 | 1518.8537 | 1587.3457 |
| Frequencies -- | 1591.3440 | 1595.2172 | 1596.5877 |
| Frequencies -- | 1596.7575 | 1619.7081 | 1620.5322 |
| Frequencies -- | 1622.1221 | 2997.8445 | 3011.4436 |
| Frequencies -- | 3011.6412 | 3013.0145 | 3014.4874 |
| Frequencies -- | 3015.4909 | 3016.3926 | 3029.6695 |
| Frequencies -- | 3037.4624 | 3102.4004 | 3105.0682 |
| Frequencies -- | 3105.4572 | 3108.6448 | 3112.6376 |
| Frequencies -- | 3113.5419 | 3119.9797 | 3128.4753 |

|                |           |           |           |
|----------------|-----------|-----------|-----------|
| Frequencies -- | 3139.1427 | 3143.1620 | 3143.4606 |
| Frequencies -- | 3146.6680 | 3148.1330 | 3150.1392 |
| Frequencies -- | 3152.3555 | 3153.2440 | 3161.5997 |
| Frequencies -- | 3179.9435 | 3201.1682 | 3203.1163 |

**Catalyst 15:****distal conformation**

| <b>vacuum</b> | <b>toluene-like solvent</b> | <b>D3 dispersion</b> |
|---------------|-----------------------------|----------------------|
| -3312.6410099 | -3312.6528831               | -0.63989531          |

|                |          |          |          |
|----------------|----------|----------|----------|
| Frequencies -- | 7.5039   | 9.2799   | 10.3058  |
| Frequencies -- | 13.2965  | 16.9163  | 21.2971  |
| Frequencies -- | 23.4875  | 26.3525  | 28.7348  |
| Frequencies -- | 30.7127  | 35.4709  | 38.1513  |
| Frequencies -- | 40.9706  | 43.7478  | 53.4429  |
| Frequencies -- | 68.4216  | 75.0078  | 78.7931  |
| Frequencies -- | 94.6140  | 97.9698  | 103.8482 |
| Frequencies -- | 105.1768 | 105.9848 | 106.7496 |
| Frequencies -- | 118.0002 | 118.4150 | 122.0492 |
| Frequencies -- | 123.5281 | 126.0113 | 127.8357 |
| Frequencies -- | 132.6868 | 138.8387 | 151.2502 |
| Frequencies -- | 152.3871 | 152.6963 | 157.2088 |
| Frequencies -- | 160.2980 | 160.5738 | 160.8288 |
| Frequencies -- | 162.4133 | 168.4087 | 173.5566 |
| Frequencies -- | 197.8991 | 203.7074 | 210.4694 |
| Frequencies -- | 217.2033 | 218.0675 | 219.0543 |
| Frequencies -- | 235.5451 | 247.9995 | 258.5038 |
| Frequencies -- | 264.1027 | 264.8157 | 264.9232 |
| Frequencies -- | 268.5375 | 273.2845 | 276.4324 |
| Frequencies -- | 279.6040 | 283.3725 | 285.0456 |
| Frequencies -- | 289.7161 | 293.0111 | 293.4419 |
| Frequencies -- | 297.0020 | 302.7908 | 308.2043 |
| Frequencies -- | 314.2447 | 319.7985 | 324.7945 |
| Frequencies -- | 331.6734 | 334.4064 | 338.4477 |
| Frequencies -- | 347.2043 | 356.3372 | 378.5166 |
| Frequencies -- | 380.1064 | 380.6824 | 384.1708 |
| Frequencies -- | 388.9034 | 389.5491 | 394.1637 |
| Frequencies -- | 407.5070 | 420.3506 | 431.9497 |
| Frequencies -- | 432.5643 | 433.4124 | 450.8736 |
| Frequencies -- | 454.0780 | 456.5724 | 457.5138 |
| Frequencies -- | 469.2808 | 473.9614 | 483.9957 |
| Frequencies -- | 509.4651 | 528.9795 | 532.9852 |
| Frequencies -- | 535.9192 | 541.2006 | 542.3628 |
| Frequencies -- | 547.9478 | 553.1512 | 572.5555 |
| Frequencies -- | 580.0017 | 584.5805 | 593.1758 |
| Frequencies -- | 596.4151 | 605.1938 | 613.9691 |
| Frequencies -- | 618.1453 | 624.6100 | 630.7864 |
| Frequencies -- | 638.5093 | 639.7062 | 642.2677 |
| Frequencies -- | 655.5732 | 661.1232 | 663.5291 |
| Frequencies -- | 695.3671 | 702.1234 | 708.4817 |
| Frequencies -- | 721.8328 | 728.0097 | 729.0086 |
| Frequencies -- | 742.3285 | 743.7075 | 758.1340 |
| Frequencies -- | 758.5874 | 768.4764 | 770.9696 |
| Frequencies -- | 798.3486 | 802.5093 | 810.4297 |
| Frequencies -- | 825.7916 | 842.9074 | 861.7253 |
| Frequencies -- | 862.3538 | 869.4246 | 874.1214 |
| Frequencies -- | 907.2696 | 907.9397 | 911.0970 |
| Frequencies -- | 915.5060 | 940.6939 | 953.8792 |

|                |           |           |           |
|----------------|-----------|-----------|-----------|
| Frequencies -- | 967.0241  | 968.5764  | 970.2849  |
| Frequencies -- | 988.6090  | 999.5500  | 1006.3327 |
| Frequencies -- | 1016.0863 | 1021.3363 | 1023.8736 |
| Frequencies -- | 1025.4475 | 1041.8686 | 1042.4573 |
| Frequencies -- | 1045.3644 | 1047.6027 | 1048.7516 |
| Frequencies -- | 1049.0805 | 1050.1257 | 1050.6787 |
| Frequencies -- | 1051.7262 | 1052.0311 | 1081.0951 |
| Frequencies -- | 1087.4236 | 1089.0381 | 1091.8119 |
| Frequencies -- | 1099.3399 | 1109.8819 | 1124.7869 |
| Frequencies -- | 1139.0768 | 1171.4167 | 1175.4358 |
| Frequencies -- | 1180.9707 | 1183.0570 | 1192.0571 |
| Frequencies -- | 1194.6975 | 1204.0026 | 1214.4834 |
| Frequencies -- | 1215.6050 | 1215.6425 | 1217.1487 |
| Frequencies -- | 1218.3464 | 1237.7286 | 1292.9703 |
| Frequencies -- | 1316.6041 | 1320.2182 | 1321.2273 |
| Frequencies -- | 1326.4966 | 1339.1044 | 1342.6629 |
| Frequencies -- | 1343.4678 | 1357.5966 | 1376.1826 |
| Frequencies -- | 1380.9804 | 1409.0418 | 1414.5094 |
| Frequencies -- | 1417.4378 | 1418.7361 | 1419.2141 |
| Frequencies -- | 1423.9340 | 1427.1427 | 1428.4091 |
| Frequencies -- | 1429.0250 | 1433.8994 | 1436.9285 |
| Frequencies -- | 1444.9618 | 1446.6012 | 1450.0625 |
| Frequencies -- | 1455.5369 | 1455.8647 | 1460.2775 |
| Frequencies -- | 1468.0262 | 1468.7485 | 1469.9139 |
| Frequencies -- | 1471.6388 | 1476.1452 | 1481.2225 |
| Frequencies -- | 1484.1936 | 1489.8230 | 1491.4703 |
| Frequencies -- | 1494.3083 | 1498.9336 | 1499.7808 |
| Frequencies -- | 1502.7975 | 1505.2070 | 1508.7000 |
| Frequencies -- | 1512.5687 | 1514.2748 | 1516.9387 |
| Frequencies -- | 1585.8858 | 1595.3887 | 1596.7242 |
| Frequencies -- | 1597.1652 | 1604.1122 | 1614.6163 |
| Frequencies -- | 1619.7840 | 1620.6261 | 1622.2753 |
| Frequencies -- | 1626.8748 | 2990.9500 | 3009.2927 |
| Frequencies -- | 3010.5994 | 3011.4123 | 3012.8776 |
| Frequencies -- | 3013.8504 | 3016.1008 | 3031.9949 |
| Frequencies -- | 3101.1475 | 3103.6007 | 3104.0232 |
| Frequencies -- | 3105.0528 | 3107.4503 | 3110.5676 |
| Frequencies -- | 3111.8416 | 3135.2267 | 3139.6243 |
| Frequencies -- | 3144.0206 | 3144.7235 | 3148.6096 |
| Frequencies -- | 3149.0442 | 3153.4297 | 3154.2225 |
| Frequencies -- | 3158.9938 | 3165.6832 | 3167.5267 |
| Frequencies -- | 3175.2102 | 3179.4803 | 3189.0120 |
| Frequencies -- | 3192.3121 | 3195.5661 | 3213.2780 |

**proximal conformation**

| <b>vacuum</b> | <b>toluene-like solvent</b> | <b>D3 dispersion</b> |
|---------------|-----------------------------|----------------------|
| -3312.6437062 | -3312.655988                | -0.63958401          |

|                |          |          |          |
|----------------|----------|----------|----------|
| Frequencies -- | 4.4705   | 9.6368   | 12.7811  |
| Frequencies -- | 16.6142  | 17.9256  | 21.7366  |
| Frequencies -- | 24.3740  | 27.3225  | 29.6843  |
| Frequencies -- | 30.2012  | 35.3075  | 38.4346  |
| Frequencies -- | 40.2761  | 43.7283  | 49.0541  |
| Frequencies -- | 62.3357  | 74.0959  | 74.9525  |
| Frequencies -- | 95.8222  | 103.5172 | 104.6843 |
| Frequencies -- | 107.3708 | 116.6897 | 117.7382 |
| Frequencies -- | 118.6021 | 120.8307 | 121.5154 |
| Frequencies -- | 125.3856 | 130.6862 | 137.1183 |
| Frequencies -- | 141.6423 | 144.8140 | 151.4974 |
| Frequencies -- | 152.4679 | 154.7651 | 157.4124 |

|                |           |           |           |
|----------------|-----------|-----------|-----------|
| Frequencies -- | 160.4800  | 161.2186  | 163.5746  |
| Frequencies -- | 166.4892  | 177.3295  | 184.5874  |
| Frequencies -- | 194.3537  | 195.7896  | 203.1549  |
| Frequencies -- | 208.3589  | 217.8516  | 218.5335  |
| Frequencies -- | 225.6927  | 240.2765  | 242.4442  |
| Frequencies -- | 259.4178  | 264.5408  | 264.8455  |
| Frequencies -- | 265.2163  | 270.1029  | 273.3681  |
| Frequencies -- | 278.7333  | 285.9729  | 288.1246  |
| Frequencies -- | 291.7438  | 293.2387  | 302.3764  |
| Frequencies -- | 304.7415  | 307.6054  | 310.6425  |
| Frequencies -- | 315.3860  | 319.6751  | 330.0770  |
| Frequencies -- | 331.9535  | 335.4324  | 337.4348  |
| Frequencies -- | 348.5071  | 349.6369  | 378.7006  |
| Frequencies -- | 379.1348  | 380.4060  | 387.0566  |
| Frequencies -- | 389.5191  | 390.3622  | 392.2707  |
| Frequencies -- | 406.1621  | 413.1802  | 432.5397  |
| Frequencies -- | 432.7878  | 432.8931  | 450.7147  |
| Frequencies -- | 454.0002  | 456.6412  | 457.1789  |
| Frequencies -- | 467.5187  | 473.6999  | 483.0557  |
| Frequencies -- | 512.4828  | 530.4424  | 536.0326  |
| Frequencies -- | 536.9352  | 541.4594  | 542.1378  |
| Frequencies -- | 548.0274  | 556.0215  | 568.8372  |
| Frequencies -- | 579.1306  | 583.6930  | 592.0388  |
| Frequencies -- | 595.9965  | 603.2016  | 613.4681  |
| Frequencies -- | 617.8554  | 623.7466  | 630.7608  |
| Frequencies -- | 638.5894  | 639.6215  | 642.4773  |
| Frequencies -- | 651.5840  | 660.1959  | 662.5982  |
| Frequencies -- | 691.5650  | 697.3178  | 709.8148  |
| Frequencies -- | 722.9107  | 727.6438  | 728.6642  |
| Frequencies -- | 742.5185  | 747.6381  | 757.9916  |
| Frequencies -- | 758.6722  | 769.7409  | 770.5713  |
| Frequencies -- | 801.8272  | 804.1217  | 812.1508  |
| Frequencies -- | 827.2566  | 842.2506  | 855.8265  |
| Frequencies -- | 865.1191  | 867.6573  | 877.4414  |
| Frequencies -- | 906.5648  | 907.1705  | 909.9327  |
| Frequencies -- | 924.6290  | 938.0116  | 950.5351  |
| Frequencies -- | 969.4599  | 970.2730  | 974.0247  |
| Frequencies -- | 990.6750  | 999.9090  | 1008.7289 |
| Frequencies -- | 1010.9546 | 1021.8952 | 1023.3415 |
| Frequencies -- | 1023.9986 | 1042.5339 | 1044.0158 |
| Frequencies -- | 1047.0118 | 1047.6821 | 1048.2932 |
| Frequencies -- | 1048.5833 | 1049.3510 | 1050.4732 |
| Frequencies -- | 1051.6865 | 1053.0454 | 1074.9598 |
| Frequencies -- | 1089.1787 | 1090.7609 | 1092.5681 |
| Frequencies -- | 1094.2822 | 1110.3020 | 1127.1947 |
| Frequencies -- | 1130.9642 | 1172.3168 | 1176.0380 |
| Frequencies -- | 1182.0539 | 1183.3429 | 1191.8470 |
| Frequencies -- | 1194.8218 | 1204.2139 | 1209.2643 |
| Frequencies -- | 1213.9477 | 1214.7844 | 1215.3135 |
| Frequencies -- | 1220.4660 | 1237.4164 | 1290.6715 |
| Frequencies -- | 1319.5204 | 1320.2192 | 1320.9175 |
| Frequencies -- | 1325.6835 | 1338.6706 | 1342.3463 |
| Frequencies -- | 1343.2050 | 1354.8057 | 1376.3637 |
| Frequencies -- | 1380.2369 | 1411.5924 | 1415.7200 |
| Frequencies -- | 1417.0361 | 1417.9665 | 1418.4599 |
| Frequencies -- | 1424.7359 | 1426.3383 | 1428.5777 |
| Frequencies -- | 1428.8112 | 1431.4305 | 1435.3080 |
| Frequencies -- | 1444.7533 | 1446.3154 | 1448.0132 |
| Frequencies -- | 1455.9421 | 1456.4882 | 1458.8869 |
| Frequencies -- | 1463.1338 | 1469.5274 | 1469.7507 |
| Frequencies -- | 1471.7097 | 1474.2368 | 1482.9424 |
| Frequencies -- | 1483.3867 | 1492.4590 | 1493.7112 |
| Frequencies -- | 1495.8316 | 1500.6932 | 1501.9347 |

|                |           |           |           |
|----------------|-----------|-----------|-----------|
| Frequencies -- | 1502.3397 | 1506.8927 | 1509.4750 |
| Frequencies -- | 1512.6282 | 1517.9035 | 1519.7748 |
| Frequencies -- | 1587.0926 | 1595.4619 | 1596.6591 |
| Frequencies -- | 1597.1143 | 1605.0883 | 1612.9497 |
| Frequencies -- | 1620.5298 | 1620.8160 | 1622.5420 |
| Frequencies -- | 1626.6955 | 2988.3205 | 3004.5174 |
| Frequencies -- | 3011.1535 | 3011.4036 | 3012.4892 |
| Frequencies -- | 3014.4461 | 3015.2358 | 3016.3283 |
| Frequencies -- | 3100.8930 | 3103.0854 | 3104.0435 |
| Frequencies -- | 3105.4125 | 3107.8452 | 3110.7468 |
| Frequencies -- | 3118.4112 | 3134.6735 | 3139.9097 |
| Frequencies -- | 3140.9617 | 3145.2487 | 3145.4209 |
| Frequencies -- | 3149.0356 | 3151.0012 | 3158.4746 |
| Frequencies -- | 3159.1166 | 3168.2315 | 3170.1799 |
| Frequencies -- | 3181.3448 | 3182.8882 | 3187.7922 |
| Frequencies -- | 3195.6263 | 3195.7220 | 3210.6911 |

**Catalyst 16:**

| <b>vacuum</b>  | <b>toluene-like solvent</b> | <b>D3 dispersion</b> |
|----------------|-----------------------------|----------------------|
| -3966.17046713 | -3966.18495693              | -0.87892812          |

|                |          |          |          |
|----------------|----------|----------|----------|
| Frequencies -- | 7.3239   | 9.3097   | 10.2288  |
| Frequencies -- | 13.5591  | 17.3815  | 19.8921  |
| Frequencies -- | 26.0852  | 28.2556  | 28.8740  |
| Frequencies -- | 33.2364  | 35.5023  | 37.7438  |
| Frequencies -- | 41.5367  | 41.7054  | 46.6221  |
| Frequencies -- | 47.9868  | 49.9393  | 51.0801  |
| Frequencies -- | 54.8544  | 57.8565  | 68.0939  |
| Frequencies -- | 73.6113  | 75.4059  | 80.0658  |
| Frequencies -- | 84.4410  | 90.3374  | 103.3719 |
| Frequencies -- | 105.5720 | 106.8578 | 117.6402 |
| Frequencies -- | 118.9327 | 119.1974 | 120.3593 |
| Frequencies -- | 121.6752 | 123.8105 | 128.2877 |
| Frequencies -- | 132.3633 | 135.7427 | 137.0302 |
| Frequencies -- | 138.9810 | 140.8121 | 144.1179 |
| Frequencies -- | 151.5675 | 152.2407 | 157.8043 |
| Frequencies -- | 160.5179 | 161.2829 | 163.7739 |
| Frequencies -- | 167.7478 | 175.7123 | 181.0094 |
| Frequencies -- | 194.0242 | 197.1980 | 207.9773 |
| Frequencies -- | 209.5852 | 211.3605 | 218.1649 |
| Frequencies -- | 220.2770 | 226.1757 | 232.1588 |
| Frequencies -- | 245.3895 | 252.7195 | 256.0471 |
| Frequencies -- | 261.5196 | 264.5105 | 264.9254 |
| Frequencies -- | 265.0344 | 269.9102 | 272.6037 |
| Frequencies -- | 278.1266 | 278.4553 | 285.3721 |
| Frequencies -- | 290.4041 | 291.2089 | 294.6165 |
| Frequencies -- | 297.7386 | 302.8225 | 305.2395 |
| Frequencies -- | 309.4755 | 315.4595 | 317.9982 |
| Frequencies -- | 319.9141 | 329.1207 | 332.5094 |
| Frequencies -- | 335.8445 | 337.6000 | 343.9134 |
| Frequencies -- | 361.8232 | 378.6346 | 379.1714 |
| Frequencies -- | 381.3212 | 385.8565 | 389.4402 |
| Frequencies -- | 392.2456 | 394.3293 | 405.4208 |
| Frequencies -- | 405.5623 | 408.2849 | 411.7744 |
| Frequencies -- | 414.8359 | 423.0625 | 432.4226 |
| Frequencies -- | 433.0572 | 434.1832 | 436.5283 |
| Frequencies -- | 442.6555 | 456.0725 | 457.0329 |
| Frequencies -- | 470.0071 | 497.1114 | 511.1846 |
| Frequencies -- | 518.2070 | 528.4862 | 530.0605 |
| Frequencies -- | 536.6323 | 541.8418 | 542.7704 |

|                |           |           |           |
|----------------|-----------|-----------|-----------|
| Frequencies -- | 543.0102  | 548.6030  | 551.7840  |
| Frequencies -- | 555.6834  | 584.1257  | 586.0743  |
| Frequencies -- | 591.4455  | 593.7763  | 593.9431  |
| Frequencies -- | 612.5003  | 615.3266  | 616.5754  |
| Frequencies -- | 617.5904  | 620.5740  | 625.1540  |
| Frequencies -- | 627.4370  | 634.6402  | 638.8636  |
| Frequencies -- | 639.7577  | 639.9653  | 641.9478  |
| Frequencies -- | 654.7861  | 658.4977  | 660.1701  |
| Frequencies -- | 683.5884  | 689.7624  | 693.8309  |
| Frequencies -- | 700.8700  | 710.6333  | 711.3840  |
| Frequencies -- | 717.9324  | 718.9525  | 726.6217  |
| Frequencies -- | 727.4498  | 740.6883  | 741.8423  |
| Frequencies -- | 745.3868  | 756.6485  | 757.2689  |
| Frequencies -- | 769.8266  | 774.0299  | 776.0069  |
| Frequencies -- | 777.9794  | 794.1401  | 803.7531  |
| Frequencies -- | 806.9356  | 807.1645  | 842.9238  |
| Frequencies -- | 848.6371  | 857.8339  | 859.3999  |
| Frequencies -- | 860.4186  | 863.6537  | 870.5629  |
| Frequencies -- | 871.6398  | 907.4514  | 907.8854  |
| Frequencies -- | 909.2249  | 917.9451  | 931.7552  |
| Frequencies -- | 939.5503  | 944.4165  | 947.9807  |
| Frequencies -- | 961.3853  | 971.0566  | 975.0460  |
| Frequencies -- | 986.3000  | 986.5086  | 994.7045  |
| Frequencies -- | 995.9218  | 997.8056  | 1001.7166 |
| Frequencies -- | 1004.5178 | 1005.2640 | 1008.5395 |
| Frequencies -- | 1010.9758 | 1015.9490 | 1020.3324 |
| Frequencies -- | 1022.7562 | 1023.4811 | 1025.9429 |
| Frequencies -- | 1039.6119 | 1040.7773 | 1042.2935 |
| Frequencies -- | 1046.0549 | 1047.0068 | 1047.6587 |
| Frequencies -- | 1048.9407 | 1049.9106 | 1050.2764 |
| Frequencies -- | 1051.3029 | 1052.4252 | 1054.7801 |
| Frequencies -- | 1055.5709 | 1066.9552 | 1089.3731 |
| Frequencies -- | 1089.6765 | 1090.2043 | 1091.0294 |
| Frequencies -- | 1091.5374 | 1093.0028 | 1093.8538 |
| Frequencies -- | 1122.1973 | 1128.4773 | 1128.7864 |
| Frequencies -- | 1170.7996 | 1174.4597 | 1177.8996 |
| Frequencies -- | 1183.0876 | 1183.1333 | 1183.8423 |
| Frequencies -- | 1185.0937 | 1201.6733 | 1204.0815 |
| Frequencies -- | 1205.2672 | 1206.8358 | 1207.5426 |
| Frequencies -- | 1212.3391 | 1213.3519 | 1214.0191 |
| Frequencies -- | 1226.6879 | 1254.6138 | 1280.5241 |
| Frequencies -- | 1304.6486 | 1318.3483 | 1320.4642 |
| Frequencies -- | 1321.2453 | 1325.6993 | 1328.8989 |
| Frequencies -- | 1331.1468 | 1331.7886 | 1333.6670 |
| Frequencies -- | 1338.1102 | 1341.4222 | 1343.7889 |
| Frequencies -- | 1368.0050 | 1368.4119 | 1368.9889 |
| Frequencies -- | 1370.1087 | 1378.3028 | 1412.6197 |
| Frequencies -- | 1416.1345 | 1416.8796 | 1417.4667 |
| Frequencies -- | 1418.7414 | 1426.7886 | 1428.0582 |
| Frequencies -- | 1428.5367 | 1431.3492 | 1436.2620 |
| Frequencies -- | 1440.4198 | 1441.0347 | 1443.8652 |
| Frequencies -- | 1445.7819 | 1447.0165 | 1448.3114 |
| Frequencies -- | 1450.6835 | 1453.4696 | 1455.9827 |
| Frequencies -- | 1461.9890 | 1468.0493 | 1468.7950 |
| Frequencies -- | 1471.2397 | 1480.1287 | 1481.6263 |
| Frequencies -- | 1488.8921 | 1494.2862 | 1496.7337 |
| Frequencies -- | 1497.4098 | 1497.9873 | 1501.6735 |
| Frequencies -- | 1503.0388 | 1503.3169 | 1507.0775 |
| Frequencies -- | 1508.7045 | 1509.1004 | 1512.5075 |
| Frequencies -- | 1517.5242 | 1521.2915 | 1525.2206 |
| Frequencies -- | 1592.0896 | 1594.9489 | 1595.6986 |
| Frequencies -- | 1596.5823 | 1597.1195 | 1597.2905 |
| Frequencies -- | 1597.4714 | 1599.7963 | 1619.7075 |



|                |           |           |           |
|----------------|-----------|-----------|-----------|
| Frequencies -- | 1620.0575 | 1621.8096 | 1623.5703 |
| Frequencies -- | 1623.9846 | 1624.3040 | 1624.7433 |
| Frequencies -- | 3010.2173 | 3010.4722 | 3011.2954 |
| Frequencies -- | 3012.3583 | 3013.7279 | 3014.3767 |
| Frequencies -- | 3019.9690 | 3101.0979 | 3105.3845 |
| Frequencies -- | 3107.2614 | 3109.0051 | 3112.9491 |
| Frequencies -- | 3141.3791 | 3146.1861 | 3148.2934 |
| Frequencies -- | 3149.9445 | 3152.2837 | 3153.3032 |
| Frequencies -- | 3154.0415 | 3155.8849 | 3160.0993 |
| Frequencies -- | 3160.4979 | 3161.7624 | 3161.8539 |
| Frequencies -- | 3167.8456 | 3169.4396 | 3171.8537 |
| Frequencies -- | 3171.9583 | 3172.6059 | 3173.4740 |
| Frequencies -- | 3178.1053 | 3183.8432 | 3185.2687 |
| Frequencies -- | 3186.0310 | 3186.1694 | 3191.1291 |
| Frequencies -- | 3194.4639 | 3194.8699 | 3197.2778 |
| Frequencies -- | 3199.5921 | 3204.3852 | 3217.5678 |

**Catalyst 17:****distal conformation**

| <b>vacuum</b> | <b>toluene-like solvent</b> | <b>D3 dispersion</b> |
|---------------|-----------------------------|----------------------|
| -3156.880895  | -3156.8919365               | -0.56228723          |

|                |          |          |          |
|----------------|----------|----------|----------|
| Frequencies -- | 6.7928   | 10.4348  | 12.6404  |
| Frequencies -- | 17.2972  | 20.0510  | 24.6223  |
| Frequencies -- | 26.3256  | 28.7343  | 31.5993  |
| Frequencies -- | 35.7626  | 38.9324  | 41.7943  |
| Frequencies -- | 43.0403  | 69.0706  | 75.0159  |
| Frequencies -- | 78.5781  | 85.4642  | 98.9669  |
| Frequencies -- | 104.9412 | 105.7747 | 109.0730 |
| Frequencies -- | 117.8152 | 118.2631 | 120.8283 |
| Frequencies -- | 125.5847 | 126.2578 | 134.4423 |
| Frequencies -- | 137.2890 | 141.4627 | 143.5395 |
| Frequencies -- | 150.5358 | 152.5949 | 153.6711 |
| Frequencies -- | 157.2847 | 160.0270 | 161.6566 |
| Frequencies -- | 162.9045 | 163.9211 | 168.8642 |
| Frequencies -- | 185.6322 | 192.3476 | 205.5908 |
| Frequencies -- | 211.9900 | 216.8113 | 218.8921 |
| Frequencies -- | 219.6076 | 238.6669 | 248.9692 |
| Frequencies -- | 253.4732 | 263.9873 | 264.4412 |
| Frequencies -- | 264.6418 | 268.5208 | 269.2786 |
| Frequencies -- | 273.1943 | 283.0175 | 285.5166 |
| Frequencies -- | 286.4424 | 291.5436 | 293.3769 |
| Frequencies -- | 299.6349 | 306.3000 | 307.9200 |
| Frequencies -- | 310.7318 | 314.9213 | 319.4449 |
| Frequencies -- | 327.3135 | 331.3942 | 334.6120 |
| Frequencies -- | 339.6910 | 358.9087 | 378.6426 |
| Frequencies -- | 378.9381 | 379.1356 | 380.9686 |
| Frequencies -- | 387.4168 | 390.7411 | 396.3368 |
| Frequencies -- | 397.9905 | 421.4520 | 432.4000 |
| Frequencies -- | 432.7252 | 433.1761 | 452.6335 |
| Frequencies -- | 454.0087 | 456.4170 | 457.5495 |
| Frequencies -- | 473.2331 | 474.3666 | 510.4040 |
| Frequencies -- | 530.9206 | 536.8470 | 541.3167 |
| Frequencies -- | 542.2585 | 548.0258 | 555.8106 |
| Frequencies -- | 559.1006 | 573.6475 | 581.7500 |
| Frequencies -- | 591.7780 | 596.7200 | 602.9499 |
| Frequencies -- | 604.4910 | 612.3757 | 630.3786 |
| Frequencies -- | 638.3379 | 639.0026 | 641.9280 |

|                |           |           |           |
|----------------|-----------|-----------|-----------|
| Frequencies -- | 650.2978  | 660.1134  | 662.9984  |
| Frequencies -- | 676.4394  | 694.1589  | 697.3892  |
| Frequencies -- | 726.4759  | 729.6706  | 742.6069  |
| Frequencies -- | 756.9624  | 759.7890  | 760.1991  |
| Frequencies -- | 770.4219  | 785.5634  | 802.4841  |
| Frequencies -- | 804.9385  | 829.4264  | 842.5886  |
| Frequencies -- | 860.1404  | 867.0738  | 868.4518  |
| Frequencies -- | 906.5842  | 908.1086  | 911.0424  |
| Frequencies -- | 952.7405  | 963.7375  | 970.6021  |
| Frequencies -- | 972.7942  | 987.4389  | 1009.7184 |
| Frequencies -- | 1022.7449 | 1024.5377 | 1026.5253 |
| Frequencies -- | 1042.3596 | 1043.5756 | 1046.8160 |
| Frequencies -- | 1047.7138 | 1048.3141 | 1048.9936 |
| Frequencies -- | 1050.5035 | 1051.8726 | 1075.5324 |
| Frequencies -- | 1089.2425 | 1090.4505 | 1098.5138 |
| Frequencies -- | 1102.6154 | 1126.8811 | 1127.0880 |
| Frequencies -- | 1134.2407 | 1165.5172 | 1171.4614 |
| Frequencies -- | 1173.0644 | 1176.0862 | 1190.0379 |
| Frequencies -- | 1201.7025 | 1214.0493 | 1215.1419 |
| Frequencies -- | 1215.3495 | 1273.3120 | 1300.6555 |
| Frequencies -- | 1318.9686 | 1322.0097 | 1326.9187 |
| Frequencies -- | 1339.0153 | 1341.5525 | 1345.7646 |
| Frequencies -- | 1385.8422 | 1411.0922 | 1415.7755 |
| Frequencies -- | 1417.5280 | 1418.1333 | 1420.6177 |
| Frequencies -- | 1424.6745 | 1426.3618 | 1428.2217 |
| Frequencies -- | 1430.1386 | 1433.3977 | 1436.5774 |
| Frequencies -- | 1444.5928 | 1446.4737 | 1447.7313 |
| Frequencies -- | 1455.3774 | 1456.3803 | 1459.4734 |
| Frequencies -- | 1466.3653 | 1469.2795 | 1469.5985 |
| Frequencies -- | 1471.5603 | 1476.8031 | 1481.6793 |
| Frequencies -- | 1483.9515 | 1484.7672 | 1488.0051 |
| Frequencies -- | 1492.9771 | 1494.2660 | 1499.0720 |
| Frequencies -- | 1501.1453 | 1507.1699 | 1508.4696 |
| Frequencies -- | 1512.1779 | 1514.7389 | 1518.9926 |
| Frequencies -- | 1589.1223 | 1596.2313 | 1597.1856 |
| Frequencies -- | 1598.2886 | 1617.2873 | 1620.1779 |
| Frequencies -- | 1620.4596 | 1622.2388 | 2989.9581 |
| Frequencies -- | 2999.1927 | 3000.7469 | 3011.0191 |
| Frequencies -- | 3011.3303 | 3012.6030 | 3014.6234 |
| Frequencies -- | 3015.8510 | 3100.1123 | 3101.9756 |
| Frequencies -- | 3103.4690 | 3105.1311 | 3106.2763 |
| Frequencies -- | 3109.8433 | 3111.4609 | 3131.2473 |
| Frequencies -- | 3134.6786 | 3141.5389 | 3145.4881 |
| Frequencies -- | 3148.0744 | 3150.4617 | 3159.9855 |
| Frequencies -- | 3163.2398 | 3176.9675 | 3194.4367 |
| Frequencies -- | 3214.0659 | 3220.6658 | 3223.5325 |

**proximal conformation**

| <b>vacuum</b> | <b>toluene-like solvent</b> | <b>D3 dispersion</b> |
|---------------|-----------------------------|----------------------|
| -3156.8812101 | -3156.8932735               | -0.56233843          |

|                |          |          |          |
|----------------|----------|----------|----------|
| Frequencies -- | -0.4387  | 9.6515   | 13.5008  |
| Frequencies -- | 14.5643  | 20.6778  | 25.0596  |
| Frequencies -- | 25.6656  | 27.9948  | 31.2709  |
| Frequencies -- | 37.6854  | 39.9090  | 42.1747  |
| Frequencies -- | 44.2112  | 66.7495  | 73.7532  |
| Frequencies -- | 85.1269  | 96.3349  | 105.2622 |
| Frequencies -- | 105.6559 | 108.6076 | 115.9838 |
| Frequencies -- | 118.2858 | 118.5550 | 120.9175 |
| Frequencies -- | 124.3888 | 126.4759 | 134.3113 |

|                |           |           |           |
|----------------|-----------|-----------|-----------|
| Frequencies -- | 137.4797  | 142.7052  | 147.2442  |
| Frequencies -- | 148.6278  | 151.7319  | 153.5371  |
| Frequencies -- | 157.3524  | 160.1347  | 161.3300  |
| Frequencies -- | 162.6875  | 164.6653  | 169.5027  |
| Frequencies -- | 186.9079  | 192.2060  | 205.0971  |
| Frequencies -- | 211.0522  | 216.9720  | 218.1296  |
| Frequencies -- | 219.2729  | 238.1847  | 244.1524  |
| Frequencies -- | 253.4349  | 263.4843  | 264.9006  |
| Frequencies -- | 265.0862  | 267.1023  | 269.0845  |
| Frequencies -- | 272.4536  | 282.1871  | 283.2924  |
| Frequencies -- | 285.2886  | 290.5519  | 293.1082  |
| Frequencies -- | 298.6834  | 304.7795  | 306.8223  |
| Frequencies -- | 309.3446  | 315.3309  | 319.9102  |
| Frequencies -- | 327.8896  | 331.2589  | 334.2949  |
| Frequencies -- | 339.2026  | 354.0576  | 378.7979  |
| Frequencies -- | 379.2775  | 379.3659  | 380.1855  |
| Frequencies -- | 389.0671  | 389.8092  | 394.8993  |
| Frequencies -- | 401.3945  | 421.3357  | 432.3847  |
| Frequencies -- | 432.6435  | 433.0117  | 453.1671  |
| Frequencies -- | 454.8316  | 456.4570  | 457.4733  |
| Frequencies -- | 473.2515  | 475.4103  | 514.3099  |
| Frequencies -- | 530.7695  | 536.5801  | 541.2869  |
| Frequencies -- | 542.1339  | 547.8858  | 556.1990  |
| Frequencies -- | 559.5612  | 575.7243  | 581.9920  |
| Frequencies -- | 592.7062  | 596.3482  | 603.0030  |
| Frequencies -- | 604.8400  | 611.0277  | 630.0138  |
| Frequencies -- | 638.5038  | 639.5450  | 642.3249  |
| Frequencies -- | 649.8058  | 661.2499  | 661.7886  |
| Frequencies -- | 676.8700  | 694.1282  | 697.4084  |
| Frequencies -- | 727.8246  | 728.8549  | 742.1755  |
| Frequencies -- | 758.2088  | 758.3067  | 763.1536  |
| Frequencies -- | 770.7118  | 783.8975  | 802.5055  |
| Frequencies -- | 804.5642  | 840.2064  | 840.7899  |
| Frequencies -- | 857.8313  | 870.2014  | 870.2698  |
| Frequencies -- | 906.7398  | 907.6227  | 910.8759  |
| Frequencies -- | 952.9082  | 965.6291  | 969.9671  |
| Frequencies -- | 971.7215  | 987.3131  | 1008.6492 |
| Frequencies -- | 1023.0078 | 1024.7423 | 1026.2446 |
| Frequencies -- | 1042.7238 | 1044.0959 | 1047.1460 |
| Frequencies -- | 1047.6092 | 1048.6035 | 1049.0796 |
| Frequencies -- | 1049.7153 | 1051.5535 | 1073.9210 |
| Frequencies -- | 1089.5551 | 1089.7668 | 1101.4074 |
| Frequencies -- | 1103.0524 | 1126.9196 | 1127.4057 |
| Frequencies -- | 1133.1634 | 1164.0910 | 1171.8135 |
| Frequencies -- | 1174.6143 | 1175.9257 | 1190.2040 |
| Frequencies -- | 1202.9278 | 1213.8991 | 1214.9419 |
| Frequencies -- | 1215.6707 | 1273.3345 | 1302.4978 |
| Frequencies -- | 1319.7038 | 1320.9486 | 1326.1250 |
| Frequencies -- | 1339.3779 | 1342.4902 | 1344.6401 |
| Frequencies -- | 1385.7632 | 1412.0566 | 1415.1177 |
| Frequencies -- | 1417.7873 | 1418.3781 | 1419.8949 |
| Frequencies -- | 1425.2026 | 1427.1604 | 1428.0141 |
| Frequencies -- | 1430.1769 | 1431.9509 | 1435.6527 |
| Frequencies -- | 1443.6640 | 1446.4673 | 1447.2076 |
| Frequencies -- | 1455.0377 | 1456.3392 | 1459.5274 |
| Frequencies -- | 1467.3078 | 1469.4321 | 1469.6711 |
| Frequencies -- | 1471.5756 | 1478.8366 | 1482.0684 |
| Frequencies -- | 1482.7480 | 1484.4407 | 1487.9707 |
| Frequencies -- | 1492.5433 | 1494.5926 | 1498.5611 |
| Frequencies -- | 1501.3069 | 1506.8731 | 1508.2351 |
| Frequencies -- | 1512.3328 | 1515.4333 | 1517.9784 |
| Frequencies -- | 1587.9903 | 1596.0250 | 1597.1780 |
| Frequencies -- | 1598.0166 | 1617.8453 | 1620.3661 |

|                |           |           |           |
|----------------|-----------|-----------|-----------|
| Frequencies -- | 1620.6080 | 1622.3306 | 2987.1543 |
| Frequencies -- | 2997.8166 | 3003.8909 | 3010.9134 |
| Frequencies -- | 3010.9993 | 3012.8757 | 3014.4645 |
| Frequencies -- | 3016.0861 | 3098.2097 | 3102.2393 |
| Frequencies -- | 3103.9506 | 3105.1870 | 3105.5191 |
| Frequencies -- | 3108.5529 | 3112.3988 | 3132.5801 |
| Frequencies -- | 3138.1500 | 3141.4175 | 3145.8111 |
| Frequencies -- | 3148.9965 | 3151.4224 | 3159.8224 |
| Frequencies -- | 3161.6816 | 3176.2899 | 3196.8267 |
| Frequencies -- | 3210.6215 | 3219.1251 | 3222.7856 |

**Catalyst 18:**

| <b>vacuum</b>  | <b>toluene-like solvent</b> | <b>D3 dispersion</b> |
|----------------|-----------------------------|----------------------|
| -3156.88123797 | -3156.89332624              | -0.56175247          |

|                |          |          |          |
|----------------|----------|----------|----------|
| Frequencies -- | 1.9503   | 8.0862   | 14.8136  |
| Frequencies -- | 16.0895  | 22.0549  | 23.9277  |
| Frequencies -- | 25.7503  | 27.7772  | 31.1112  |
| Frequencies -- | 36.6601  | 36.9474  | 41.2078  |
| Frequencies -- | 43.5534  | 66.4142  | 71.6169  |
| Frequencies -- | 82.8486  | 98.3890  | 104.9518 |
| Frequencies -- | 106.1645 | 107.0834 | 108.5670 |
| Frequencies -- | 116.9009 | 118.2905 | 119.3998 |
| Frequencies -- | 124.1222 | 125.0713 | 125.7570 |
| Frequencies -- | 132.7227 | 140.2813 | 148.3574 |
| Frequencies -- | 151.8374 | 152.9085 | 154.8521 |
| Frequencies -- | 157.1113 | 159.1186 | 160.3111 |
| Frequencies -- | 160.8445 | 161.8482 | 166.9383 |
| Frequencies -- | 183.2727 | 193.5764 | 199.7473 |
| Frequencies -- | 212.6235 | 217.5756 | 217.7816 |
| Frequencies -- | 218.9340 | 233.8894 | 242.3537 |
| Frequencies -- | 262.9819 | 263.5753 | 264.6743 |
| Frequencies -- | 265.1843 | 266.6535 | 271.4430 |
| Frequencies -- | 273.5315 | 281.7697 | 283.0658 |
| Frequencies -- | 288.0603 | 292.3649 | 293.5458 |
| Frequencies -- | 299.4682 | 302.7141 | 305.3414 |
| Frequencies -- | 310.2144 | 315.3021 | 320.0364 |
| Frequencies -- | 331.1262 | 334.2371 | 338.7951 |
| Frequencies -- | 353.3578 | 370.5922 | 378.8590 |
| Frequencies -- | 378.9810 | 380.2792 | 388.1021 |
| Frequencies -- | 390.1604 | 393.0622 | 406.1356 |
| Frequencies -- | 411.5768 | 417.3961 | 431.0432 |
| Frequencies -- | 432.2622 | 432.5068 | 432.8361 |
| Frequencies -- | 453.4341 | 456.4541 | 457.4084 |
| Frequencies -- | 473.3929 | 482.6956 | 510.4511 |
| Frequencies -- | 517.9659 | 530.8746 | 537.0359 |
| Frequencies -- | 541.1537 | 542.0923 | 547.7794 |
| Frequencies -- | 554.8405 | 568.0793 | 580.2247 |
| Frequencies -- | 582.0481 | 592.8067 | 595.9267 |
| Frequencies -- | 603.2961 | 612.5028 | 630.6657 |
| Frequencies -- | 635.9753 | 638.5585 | 639.8093 |
| Frequencies -- | 642.5831 | 661.1910 | 662.0349 |
| Frequencies -- | 690.8022 | 697.1023 | 714.4308 |
| Frequencies -- | 727.9357 | 728.4397 | 742.8914 |
| Frequencies -- | 758.3871 | 758.8897 | 768.5463 |
| Frequencies -- | 770.8159 | 801.7267 | 802.1922 |
| Frequencies -- | 804.2397 | 826.4331 | 843.1308 |
| Frequencies -- | 857.9413 | 869.8225 | 907.0388 |
| Frequencies -- | 907.9721 | 910.7158 | 927.8294 |
| Frequencies -- | 945.1647 | 968.4151 | 969.1873 |

|                |           |           |           |
|----------------|-----------|-----------|-----------|
| Frequencies -- | 972.4159  | 990.4606  | 1010.2472 |
| Frequencies -- | 1012.3416 | 1023.5739 | 1025.5499 |
| Frequencies -- | 1042.1124 | 1044.8455 | 1046.9806 |
| Frequencies -- | 1048.2822 | 1048.8137 | 1049.3188 |
| Frequencies -- | 1050.2851 | 1051.6068 | 1077.0343 |
| Frequencies -- | 1088.7487 | 1089.8808 | 1102.1459 |
| Frequencies -- | 1121.8271 | 1126.2280 | 1126.5728 |
| Frequencies -- | 1144.1723 | 1171.3491 | 1171.5690 |
| Frequencies -- | 1176.0768 | 1186.3420 | 1188.5062 |
| Frequencies -- | 1214.0033 | 1214.8777 | 1215.5182 |
| Frequencies -- | 1232.3234 | 1262.9219 | 1315.4892 |
| Frequencies -- | 1320.4326 | 1320.8632 | 1326.3301 |
| Frequencies -- | 1339.0699 | 1342.6470 | 1343.4560 |
| Frequencies -- | 1362.5851 | 1411.6424 | 1416.2170 |
| Frequencies -- | 1417.5180 | 1418.4727 | 1419.1470 |
| Frequencies -- | 1425.6792 | 1426.3183 | 1427.1679 |
| Frequencies -- | 1430.1667 | 1432.0569 | 1435.6920 |
| Frequencies -- | 1438.7890 | 1443.6590 | 1447.1192 |
| Frequencies -- | 1455.0949 | 1455.3536 | 1461.1459 |
| Frequencies -- | 1469.2533 | 1469.2552 | 1471.2535 |
| Frequencies -- | 1472.2052 | 1475.7509 | 1482.7451 |
| Frequencies -- | 1483.8621 | 1485.5321 | 1491.5237 |
| Frequencies -- | 1495.2526 | 1498.5538 | 1501.1277 |
| Frequencies -- | 1501.2654 | 1506.6114 | 1508.4723 |
| Frequencies -- | 1512.1904 | 1515.4276 | 1517.3285 |
| Frequencies -- | 1580.3087 | 1595.9133 | 1597.3151 |
| Frequencies -- | 1597.4432 | 1620.0303 | 1620.2451 |
| Frequencies -- | 1621.9463 | 1623.8638 | 2987.8598 |
| Frequencies -- | 2998.3815 | 3005.3252 | 3010.5536 |
| Frequencies -- | 3010.8829 | 3012.3150 | 3014.2011 |
| Frequencies -- | 3015.7129 | 3099.0300 | 3100.5849 |
| Frequencies -- | 3102.8405 | 3103.9981 | 3105.1721 |
| Frequencies -- | 3108.3090 | 3110.6595 | 3132.8769 |
| Frequencies -- | 3138.6931 | 3139.1309 | 3144.1366 |
| Frequencies -- | 3145.9507 | 3149.4501 | 3159.6600 |
| Frequencies -- | 3163.5237 | 3192.5436 | 3192.9164 |
| Frequencies -- | 3195.0941 | 3214.1126 | 3217.6944 |

**Catalyst 19:**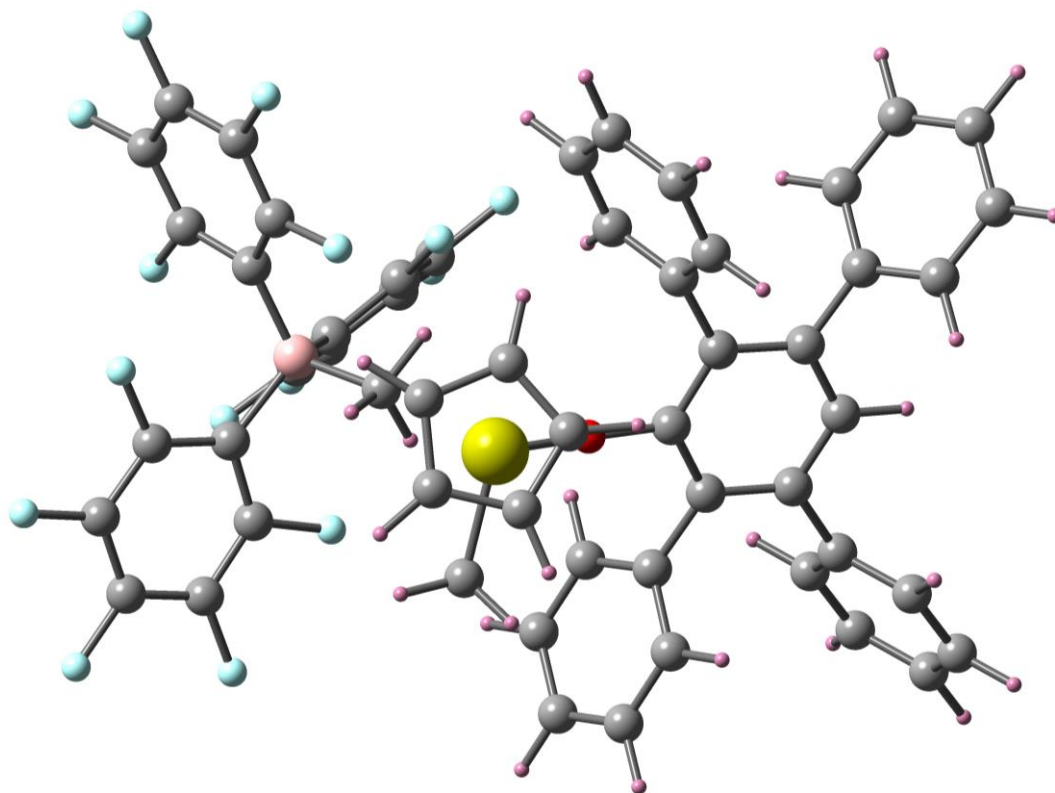

| <b>vacuum</b> | <b>toluene-like solvent</b> | <b>D3 dispersion</b> |
|---------------|-----------------------------|----------------------|
| -3769.708235  | -3769.7250185               | -0.78125342          |

|    |             |             |             |
|----|-------------|-------------|-------------|
| Ti | -0.39067700 | -0.09488400 | -2.29715400 |
| C  | -0.14459900 | -2.10885300 | -2.75586200 |
| H  | -0.13022500 | -2.61776500 | -1.78156700 |
| H  | -0.97088200 | -2.51562300 | -3.35558400 |
| H  | 0.80292500  | -2.27656500 | -3.29125200 |
| O  | -1.80147000 | -0.13054300 | -1.21241400 |
| C  | -3.05432700 | -0.03855700 | -0.59759300 |
| C  | -3.64424400 | 1.25017900  | -0.38878200 |
| C  | -3.71008100 | -1.26421800 | -0.25592300 |
| C  | -4.97913000 | 1.29234800  | 0.11742400  |
| C  | -5.04728800 | -1.19033700 | 0.23601900  |
| C  | -5.65320300 | 0.07844300  | 0.38138900  |
| H  | -6.66220600 | 0.12556400  | 0.78866800  |
| H  | -0.54892600 | 2.85299000  | -2.89322600 |
| C  | -0.44515300 | 1.93978300  | -3.46611900 |
| C  | 0.79426000  | 1.35147200  | -3.89927600 |
| C  | -1.51943700 | 1.11771100  | -3.95479200 |
| H  | 1.78307900  | 1.74520400  | -3.69062700 |
| C  | 0.48779600  | 0.16897600  | -4.64451500 |
| H  | -2.57810400 | 1.30384600  | -3.81487300 |
| C  | -0.93897000 | 0.01766200  | -4.67440600 |
| H  | 1.20835100  | -0.51120600 | -5.08891400 |
| H  | -1.48360000 | -0.78641700 | -5.15920700 |

|   |             |             |             |
|---|-------------|-------------|-------------|
| F | 5.72161600  | -4.61430100 | -2.31960500 |
| C | 5.08686000  | -3.53829000 | -1.71600000 |
| C | 5.62904700  | -2.24658300 | -1.79990600 |
| C | 3.87629600  | -3.71734200 | -1.02502900 |
| C | 4.96372100  | -1.16531800 | -1.18233400 |
| F | 6.81206000  | -2.04136900 | -2.50062100 |
| C | 3.25854300  | -2.60626300 | -0.42732100 |
| F | 3.30289500  | -4.98252500 | -0.94596400 |
| C | 3.76382500  | -1.28366500 | -0.44345700 |
| F | 5.57583100  | 0.08168700  | -1.37031100 |
| F | 2.03998200  | -2.87518000 | 0.22420900  |
| B | 2.90909900  | -0.02178200 | 0.23052000  |
| C | 3.76082100  | 1.40975300  | 0.27321700  |
| C | 3.48207800  | 2.58528900  | -0.45349400 |
| C | 4.86492200  | 1.55563200  | 1.14963900  |
| C | 4.19079900  | 3.79686200  | -0.32740600 |
| F | 2.43699500  | 2.61851900  | -1.40068200 |
| C | 5.61153300  | 2.73627600  | 1.31258500  |
| F | 5.29430500  | 0.45670100  | 1.90058700  |
| C | 5.26796700  | 3.87774700  | 0.56767000  |
| F | 3.83095200  | 4.90948200  | -1.08364000 |
| F | 6.68416900  | 2.78530000  | 2.19425900  |
| F | 5.98191800  | 5.05850500  | 0.71091700  |
| C | 2.41582300  | -0.28660300 | 1.80791900  |
| C | 1.45059000  | 0.55387400  | 2.40848100  |
| C | 2.91402200  | -1.27075200 | 2.69658100  |
| C | 0.97158600  | 0.43207500  | 3.72565300  |
| C | 2.46823000  | -1.43948600 | 4.02433000  |
| C | 1.48222900  | -0.58605900 | 4.54630400  |
| F | 3.92458700  | -2.14867600 | 2.30306000  |
| F | 3.00104900  | -2.44114500 | 4.82691200  |
| F | 1.02811300  | -0.73901600 | 5.84831100  |
| F | 0.00516400  | 1.30670800  | 4.21632900  |
| F | 0.90992100  | 1.63212100  | 1.67778700  |
| C | 1.50832900  | 0.04288500  | -0.76297600 |
| H | 0.94705700  | 0.95755800  | -0.52566600 |
| H | 1.91813700  | 0.04174900  | -1.78621200 |
| H | 0.96762400  | -0.87557800 | -0.49565300 |
| C | -2.90407500 | 2.52737800  | -0.67949500 |
| C | -3.37129300 | 3.43348100  | -1.66675400 |
| C | -1.76855400 | 2.89457500  | 0.08699100  |
| C | -2.72508800 | 4.66843200  | -1.88144600 |
| H | -4.25305800 | 3.17994500  | -2.25780600 |
| C | -1.11958500 | 4.13001700  | -0.12438900 |
| H | -1.40642800 | 2.23116700  | 0.87114000  |
| C | -1.59625500 | 5.02355100  | -1.10901100 |
| H | -3.10692100 | 5.35405100  | -2.64127400 |
| H | -0.25341900 | 4.39403700  | 0.48556300  |
| H | -1.09958800 | 5.98321100  | -1.26741400 |
| C | -5.71264600 | 2.56959000  | 0.43379400  |
| C | -6.94748800 | 2.85646400  | -0.20462700 |
| C | -5.24260100 | 3.47019900  | 1.42441500  |
| C | -7.68233800 | 4.01616300  | 0.12162500  |
| H | -7.33040900 | 2.17518900  | -0.96798000 |
| C | -5.97937800 | 4.62539100  | 1.75855300  |
| H | -4.30722500 | 3.26280400  | 1.94539500  |
| C | -7.20013200 | 4.90658000  | 1.10584600  |

|   |             |             |             |
|---|-------------|-------------|-------------|
| H | -8.62611100 | 4.22156500  | -0.38914200 |
| H | -5.60193100 | 5.30117000  | 2.52946800  |
| H | -7.76844300 | 5.80319500  | 1.36357800  |
| C | -5.85458200 | -2.39427600 | 0.64496000  |
| C | -7.09539200 | -2.66144400 | 0.00912300  |
| C | -5.44947900 | -3.23973600 | 1.70981400  |
| C | -7.89956100 | -3.74872600 | 0.41190200  |
| H | -7.42784700 | -2.02311500 | -0.81268600 |
| C | -6.25550800 | -4.32185800 | 2.12019200  |
| H | -4.50989900 | -3.04637700 | 2.22807100  |
| C | -7.48212400 | -4.58435600 | 1.47087400  |
| H | -8.84662400 | -3.94063800 | -0.09801700 |
| H | -5.92657500 | -4.95564500 | 2.94696900  |
| H | -8.10414100 | -5.42453300 | 1.78793700  |
| C | -3.02260500 | -2.59344400 | -0.41008700 |
| C | -3.46788000 | -3.53591000 | -1.37135700 |
| C | -1.95959800 | -2.96192400 | 0.45418900  |
| C | -2.87357900 | -4.81192800 | -1.46277400 |
| H | -4.29029200 | -3.27554000 | -2.04040600 |
| C | -1.36620000 | -4.23916900 | 0.36934100  |
| H | -1.60922700 | -2.25605600 | 1.21054500  |
| C | -1.82326900 | -5.17034500 | -0.58945500 |
| H | -3.23487800 | -5.52553700 | -2.20691100 |
| H | -0.55211700 | -4.50404600 | 1.04681500  |
| H | -1.36477200 | -6.15929400 | -0.65502100 |

|                |          |          |          |
|----------------|----------|----------|----------|
| Frequencies -- | 3.9649   | 11.2002  | 14.5950  |
| Frequencies -- | 16.8335  | 23.7698  | 25.1251  |
| Frequencies -- | 27.9565  | 28.7191  | 31.4428  |
| Frequencies -- | 37.0563  | 39.4956  | 42.6964  |
| Frequencies -- | 43.9515  | 45.5296  | 47.0954  |
| Frequencies -- | 48.1824  | 52.9600  | 58.3728  |
| Frequencies -- | 62.1564  | 64.5919  | 71.0846  |
| Frequencies -- | 74.6640  | 81.1961  | 88.5170  |
| Frequencies -- | 92.0147  | 99.9206  | 107.3771 |
| Frequencies -- | 112.1263 | 114.6466 | 118.3143 |
| Frequencies -- | 122.8157 | 124.6721 | 124.9176 |
| Frequencies -- | 138.0010 | 141.5814 | 147.5968 |
| Frequencies -- | 151.2891 | 151.5452 | 156.1344 |
| Frequencies -- | 158.5015 | 161.5337 | 169.0552 |
| Frequencies -- | 192.9731 | 193.6421 | 202.8718 |
| Frequencies -- | 211.6751 | 213.2178 | 215.0201 |
| Frequencies -- | 217.1277 | 223.0027 | 228.4787 |
| Frequencies -- | 236.5060 | 247.6254 | 252.6427 |
| Frequencies -- | 257.8176 | 260.7599 | 264.1970 |
| Frequencies -- | 264.5447 | 264.9768 | 272.9626 |
| Frequencies -- | 274.5025 | 275.3814 | 280.4375 |
| Frequencies -- | 285.5582 | 292.7117 | 300.3348 |
| Frequencies -- | 302.1368 | 311.5310 | 322.8455 |
| Frequencies -- | 327.8589 | 328.5749 | 335.1618 |
| Frequencies -- | 337.7316 | 348.7426 | 350.2271 |
| Frequencies -- | 370.1252 | 374.0529 | 378.1973 |
| Frequencies -- | 379.4277 | 379.9793 | 401.0312 |
| Frequencies -- | 401.6466 | 404.5746 | 405.6269 |
| Frequencies -- | 407.1054 | 408.6417 | 412.6085 |
| Frequencies -- | 431.6338 | 433.2055 | 433.7036 |
| Frequencies -- | 445.9816 | 450.8084 | 457.9418 |
| Frequencies -- | 458.2846 | 475.8704 | 488.9598 |
| Frequencies -- | 517.7587 | 520.7274 | 529.4103 |
| Frequencies -- | 541.2786 | 542.8266 | 543.9722 |



|                |           |           |           |
|----------------|-----------|-----------|-----------|
| Frequencies -- | 548.2878  | 549.2273  | 557.2965  |
| Frequencies -- | 567.1666  | 588.5656  | 596.7448  |
| Frequencies -- | 602.8159  | 613.5195  | 616.2734  |
| Frequencies -- | 618.0086  | 620.0704  | 624.5830  |
| Frequencies -- | 632.3241  | 633.5916  | 634.9932  |
| Frequencies -- | 637.9920  | 640.4117  | 642.0245  |
| Frequencies -- | 651.8375  | 657.2738  | 668.0325  |
| Frequencies -- | 687.5647  | 692.1703  | 696.3611  |
| Frequencies -- | 700.3956  | 709.8132  | 710.7371  |
| Frequencies -- | 715.0763  | 718.5107  | 719.8133  |
| Frequencies -- | 731.2817  | 741.3589  | 743.6448  |
| Frequencies -- | 748.4424  | 751.3480  | 764.6900  |
| Frequencies -- | 766.0565  | 770.1180  | 773.0807  |
| Frequencies -- | 784.5024  | 797.2346  | 802.1982  |
| Frequencies -- | 806.6227  | 813.5333  | 825.2036  |
| Frequencies -- | 839.3502  | 842.5357  | 843.4127  |
| Frequencies -- | 857.8671  | 859.4252  | 859.6497  |
| Frequencies -- | 861.4384  | 867.5501  | 875.6195  |
| Frequencies -- | 877.7830  | 879.5323  | 902.4617  |
| Frequencies -- | 912.7934  | 914.0381  | 915.8037  |
| Frequencies -- | 916.6892  | 934.8984  | 936.8494  |
| Frequencies -- | 940.6918  | 948.5635  | 965.6086  |
| Frequencies -- | 985.6476  | 986.9518  | 992.2755  |
| Frequencies -- | 995.5235  | 999.6656  | 1005.2885 |
| Frequencies -- | 1006.2938 | 1011.1237 | 1012.4669 |
| Frequencies -- | 1013.3154 | 1017.5469 | 1020.2911 |
| Frequencies -- | 1021.0998 | 1026.7315 | 1028.3864 |
| Frequencies -- | 1031.3074 | 1033.3025 | 1039.9809 |
| Frequencies -- | 1045.6444 | 1048.8943 | 1050.2444 |
| Frequencies -- | 1052.2745 | 1054.2993 | 1054.3923 |
| Frequencies -- | 1055.0720 | 1080.4111 | 1085.5215 |
| Frequencies -- | 1090.2358 | 1091.0320 | 1091.6034 |
| Frequencies -- | 1092.2517 | 1092.4434 | 1094.0528 |
| Frequencies -- | 1123.7362 | 1129.1094 | 1129.5967 |
| Frequencies -- | 1135.3977 | 1183.5156 | 1183.6068 |
| Frequencies -- | 1185.2264 | 1186.3097 | 1199.7359 |
| Frequencies -- | 1204.6395 | 1205.7835 | 1207.1225 |
| Frequencies -- | 1209.4787 | 1214.3361 | 1215.8383 |
| Frequencies -- | 1218.1943 | 1232.3721 | 1254.5661 |
| Frequencies -- | 1282.3424 | 1286.7779 | 1304.8029 |
| Frequencies -- | 1317.1973 | 1321.2012 | 1322.9763 |
| Frequencies -- | 1326.5173 | 1327.7595 | 1331.3816 |
| Frequencies -- | 1332.6460 | 1335.0385 | 1340.0330 |
| Frequencies -- | 1345.1833 | 1349.0960 | 1366.1619 |
| Frequencies -- | 1368.0485 | 1370.1212 | 1371.3059 |
| Frequencies -- | 1378.9012 | 1391.2375 | 1396.5787 |
| Frequencies -- | 1413.3716 | 1419.6793 | 1423.4465 |
| Frequencies -- | 1426.9425 | 1441.4119 | 1441.7310 |
| Frequencies -- | 1443.3123 | 1443.6875 | 1446.2114 |
| Frequencies -- | 1447.7631 | 1449.8479 | 1451.1299 |
| Frequencies -- | 1457.3968 | 1468.4657 | 1469.2435 |
| Frequencies -- | 1471.7299 | 1475.2954 | 1496.9358 |
| Frequencies -- | 1497.4349 | 1502.4548 | 1509.1022 |
| Frequencies -- | 1527.1123 | 1587.3555 | 1593.9798 |
| Frequencies -- | 1594.9106 | 1595.2350 | 1596.9525 |
| Frequencies -- | 1597.6600 | 1598.1274 | 1598.9643 |
| Frequencies -- | 1618.9911 | 1620.8597 | 1621.6185 |
| Frequencies -- | 1622.8635 | 1623.2690 | 1623.9489 |
| Frequencies -- | 1624.5134 | 2976.0030 | 3010.1234 |
| Frequencies -- | 3116.2328 | 3133.6724 | 3139.3906 |
| Frequencies -- | 3150.2063 | 3152.9564 | 3153.0949 |
| Frequencies -- | 3157.9591 | 3159.4572 | 3161.0625 |
| Frequencies -- | 3161.2074 | 3161.9201 | 3171.1633 |

|                |           |           |           |
|----------------|-----------|-----------|-----------|
| Frequencies -- | 3173.2019 | 3173.4487 | 3174.1294 |
| Frequencies -- | 3182.5174 | 3183.1729 | 3185.8832 |
| Frequencies -- | 3186.7039 | 3193.5989 | 3194.9001 |
| Frequencies -- | 3197.6098 | 3198.0551 | 3198.9715 |
| Frequencies -- | 3213.4980 | 3244.3495 | 3259.2324 |
| Frequencies -- | 3273.8945 | 3276.7248 | 3297.7999 |

**Catalyst 20:****distal conformation**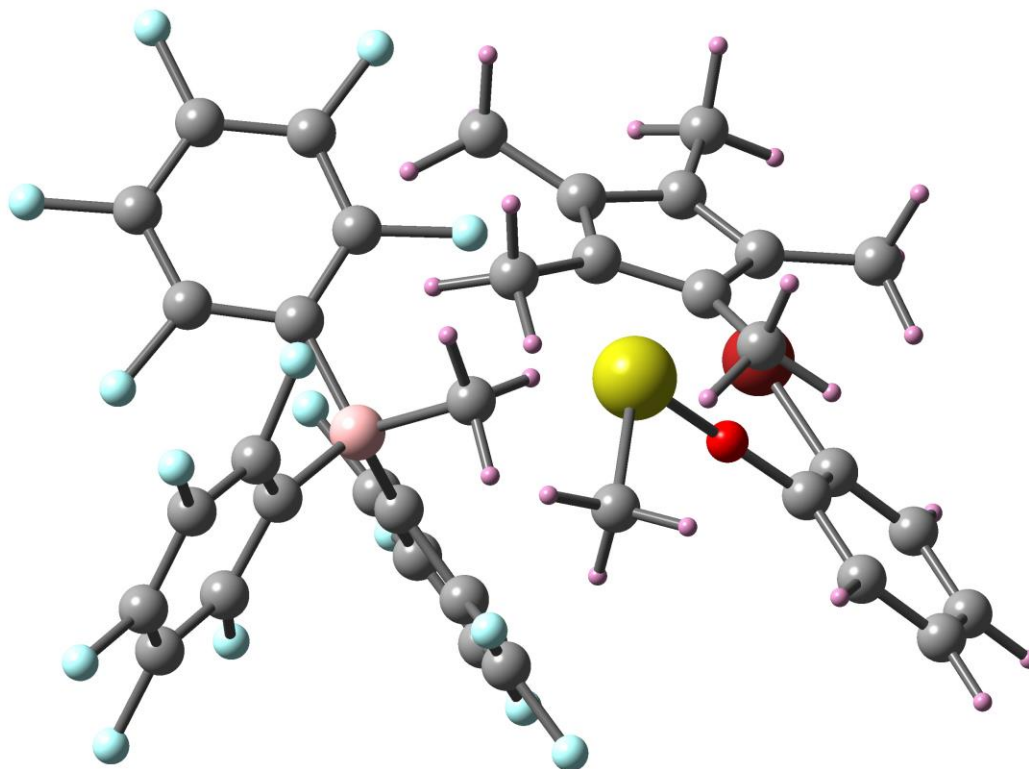

| <b>vacuum</b> | <b>toluene-like solvent</b> | <b>D3 dispersion</b> |
|---------------|-----------------------------|----------------------|
| -3054.962514  | -3054.973941                | -0.55747543          |

|    |            |             |             |
|----|------------|-------------|-------------|
| Ti | 2.01723900 | -1.71230800 | -0.43123600 |
| C  | 1.84446700 | -2.08102800 | -2.48468300 |
| H  | 1.57876600 | -1.10050500 | -2.91764300 |
| H  | 2.77933500 | -2.42575000 | -2.94861700 |
| H  | 1.04749400 | -2.81068600 | -2.69752000 |
| O  | 3.11152100 | -0.30751700 | -0.57438600 |
| C  | 4.06304300 | 0.65505000  | -0.82387400 |
| C  | 4.32090200 | 1.71586300  | 0.08647200  |
| C  | 4.78461900 | 0.60678000  | -2.04565400 |
| C  | 5.28041300 | 2.70216600  | -0.22048300 |
| C  | 5.74223500 | 1.59033200  | -2.35017800 |
| C  | 5.99250800 | 2.63890300  | -1.43717700 |
| H  | 5.46359600 | 3.51556700  | 0.48170400  |
| H  | 6.28257500 | 1.54295200  | -3.29729700 |
| C  | 2.61948300 | -2.81663800 | 1.57973300  |
| C  | 1.40260300 | -3.49202800 | 1.17377900  |
| C  | 3.63290800 | -3.08367100 | 0.57968100  |
| C  | 1.65992000 | -4.16980100 | -0.07393800 |
| C  | 3.03642500 | -3.92549600 | -0.44162600 |

|   |             |             |             |
|---|-------------|-------------|-------------|
| F | 0.23179300  | 5.93700400  | -0.94574600 |
| C | -0.21573900 | 4.63921900  | -0.74319500 |
| C | -1.04720200 | 4.32834500  | 0.34359200  |
| C | 0.15267200  | 3.60991600  | -1.62505300 |
| C | -1.48695900 | 3.00101200  | 0.53326900  |
| F | -1.43386500 | 5.33365800  | 1.22233300  |
| C | -0.31062700 | 2.30537800  | -1.38641200 |
| F | 0.96618500  | 3.89070000  | -2.71884400 |
| C | -1.13609200 | 1.91657900  | -0.30372600 |
| F | -2.33882000 | 2.81963500  | 1.62955500  |
| F | 0.07494300  | 1.35114800  | -2.35122900 |
| B | -1.57893500 | 0.32486300  | -0.07662700 |
| C | -2.32955300 | 0.06953300  | 1.38918800  |
| C | -2.51987200 | -0.25851200 | -1.32613400 |
| C | -0.10520300 | -0.56570600 | -0.11738500 |
| C | -3.73197800 | -0.03939700 | 1.55253400  |
| C | -1.62882500 | -0.04984000 | 2.61054900  |
| C | -3.20694000 | 0.53939600  | -2.27206600 |
| C | -2.71547300 | -1.64263000 | -1.53453000 |
| H | 0.59909100  | -0.00494700 | 0.51249500  |
| H | -0.35065800 | -1.56026100 | 0.26865100  |
| H | 0.15900200  | -0.55161900 | -1.18344800 |
| C | -4.37772600 | -0.28027200 | 2.78230900  |
| F | -4.59129100 | 0.13153100  | 0.46162000  |
| C | -2.21986100 | -0.29159800 | 3.86373100  |
| F | -0.22582900 | 0.10742400  | 2.64474400  |
| C | -3.96830900 | 0.02745500  | -3.34231500 |
| F | -3.19893200 | 1.93358800  | -2.16983100 |
| C | -3.46535600 | -2.20855000 | -2.58132600 |
| F | -2.16225300 | -2.57937700 | -0.63095000 |
| C | -3.61514200 | -0.41624600 | 3.95347900  |
| F | -5.76219100 | -0.37858200 | 2.84870400  |
| F | -1.43540800 | -0.40879000 | 5.00916600  |
| C | -4.09579000 | -1.36156700 | -3.50638400 |
| F | -4.60455100 | 0.88388500  | -4.23240900 |
| F | -3.58665300 | -3.59065400 | -2.70527900 |
| F | -4.22637100 | -0.66111000 | 5.17450600  |
| F | -4.83685800 | -1.88693400 | -4.55488600 |
| C | 3.78699500  | -4.60711000 | -1.56091900 |
| H | 4.64600300  | -4.01837200 | -1.90975600 |
| H | 4.18188500  | -5.57292900 | -1.20039400 |
| H | 3.14969600  | -4.82153700 | -2.42760800 |
| C | 5.09559000  | -2.71308300 | 0.67631500  |
| H | 5.64985700  | -3.51298700 | 1.19702900  |
| H | 5.56138900  | -2.58313100 | -0.30986600 |
| H | 5.25328800  | -1.78581800 | 1.24136000  |
| C | 0.68770300  | -5.07376800 | -0.79508200 |
| H | 0.95099200  | -5.21301300 | -1.85103100 |
| H | 0.69036200  | -6.07361100 | -0.32639900 |
| H | -0.34419300 | -4.70104400 | -0.74988200 |
| C | 0.15565000  | -3.64000100 | 2.01639500  |
| H | -0.75325600 | -3.76044900 | 1.41388900  |
| H | 0.25055400  | -4.54500900 | 2.64161500  |
| H | 0.00604600  | -2.79418900 | 2.69732500  |
| C | 2.82599400  | -2.10482500 | 2.89682100  |
| H | 3.02763800  | -2.84857700 | 3.68768100  |
| H | 3.67935700  | -1.41691400 | 2.87136800  |

|    |            |             |             |
|----|------------|-------------|-------------|
| H  | 1.94487000 | -1.53045700 | 3.21107200  |
| H  | 6.72898000 | 3.41002300  | -1.66807500 |
| Br | 3.33137400 | 1.85073500  | 1.76994500  |
| H  | 4.56849000 | -0.19894900 | -2.74661500 |

|                |           |           |           |
|----------------|-----------|-----------|-----------|
| Frequencies -- | 6.1878    | 12.8696   | 16.9649   |
| Frequencies -- | 19.5497   | 21.5033   | 25.9568   |
| Frequencies -- | 27.3558   | 30.7669   | 33.3773   |
| Frequencies -- | 37.5647   | 41.5483   | 42.3669   |
| Frequencies -- | 45.0651   | 70.1489   | 74.7017   |
| Frequencies -- | 90.2887   | 103.5426  | 104.9499  |
| Frequencies -- | 106.1017  | 108.6394  | 114.0139  |
| Frequencies -- | 115.4327  | 118.0425  | 119.3446  |
| Frequencies -- | 120.0427  | 124.8896  | 130.5063  |
| Frequencies -- | 133.0219  | 141.3174  | 150.5677  |
| Frequencies -- | 153.6431  | 155.2651  | 157.3784  |
| Frequencies -- | 159.4118  | 160.1792  | 162.8996  |
| Frequencies -- | 168.1485  | 168.5100  | 177.4602  |
| Frequencies -- | 182.7993  | 200.3840  | 212.8351  |
| Frequencies -- | 217.6257  | 220.0074  | 221.8033  |
| Frequencies -- | 242.3829  | 252.3845  | 263.6774  |
| Frequencies -- | 264.8346  | 264.9878  | 266.7146  |
| Frequencies -- | 268.8654  | 273.6543  | 278.0367  |
| Frequencies -- | 281.9212  | 286.9996  | 290.9513  |
| Frequencies -- | 294.6733  | 295.2459  | 303.4612  |
| Frequencies -- | 308.1915  | 308.3089  | 313.3317  |
| Frequencies -- | 321.0646  | 324.1058  | 331.3032  |
| Frequencies -- | 334.3935  | 338.3429  | 356.3716  |
| Frequencies -- | 357.7547  | 379.3086  | 379.6389  |
| Frequencies -- | 380.8679  | 386.3203  | 388.1815  |
| Frequencies -- | 391.4964  | 395.0414  | 418.6928  |
| Frequencies -- | 432.1666  | 432.8553  | 433.0448  |
| Frequencies -- | 446.5466  | 453.3948  | 456.5393  |
| Frequencies -- | 457.7928  | 473.8574  | 490.4946  |
| Frequencies -- | 504.1903  | 530.2989  | 535.7658  |
| Frequencies -- | 538.4446  | 541.1482  | 542.4675  |
| Frequencies -- | 548.0613  | 557.1015  | 579.4217  |
| Frequencies -- | 583.3682  | 591.9004  | 597.1715  |
| Frequencies -- | 599.8578  | 613.0792  | 630.1913  |
| Frequencies -- | 631.8432  | 638.3337  | 639.4182  |
| Frequencies -- | 642.4637  | 660.5965  | 663.4959  |
| Frequencies -- | 671.7041  | 694.1781  | 703.8613  |
| Frequencies -- | 708.5364  | 726.5734  | 729.8009  |
| Frequencies -- | 742.2486  | 757.4250  | 760.2242  |
| Frequencies -- | 765.1963  | 770.2075  | 803.5382  |
| Frequencies -- | 805.3340  | 837.2274  | 861.5091  |
| Frequencies -- | 864.5894  | 867.9846  | 906.4046  |
| Frequencies -- | 908.2405  | 911.3867  | 932.8834  |
| Frequencies -- | 956.1250  | 971.1802  | 974.2768  |
| Frequencies -- | 993.4284  | 1013.9688 | 1022.7047 |
| Frequencies -- | 1026.0670 | 1028.8023 | 1043.0501 |
| Frequencies -- | 1044.1070 | 1047.5638 | 1048.1860 |
| Frequencies -- | 1048.7338 | 1049.1488 | 1050.8688 |
| Frequencies -- | 1051.8534 | 1053.4846 | 1078.4495 |
| Frequencies -- | 1089.9397 | 1090.8077 | 1093.7010 |
| Frequencies -- | 1127.2497 | 1128.0609 | 1133.0049 |
| Frequencies -- | 1172.3406 | 1175.1440 | 1184.3890 |
| Frequencies -- | 1191.7347 | 1214.3010 | 1215.2917 |
| Frequencies -- | 1215.7738 | 1255.6201 | 1276.9957 |
| Frequencies -- | 1318.8792 | 1321.9053 | 1327.3206 |
| Frequencies -- | 1338.8788 | 1341.2499 | 1345.7059 |
| Frequencies -- | 1357.5949 | 1411.9458 | 1417.1575 |

|                |           |           |           |
|----------------|-----------|-----------|-----------|
| Frequencies -- | 1417.6995 | 1418.1205 | 1420.3871 |
| Frequencies -- | 1425.7416 | 1427.6523 | 1428.6063 |
| Frequencies -- | 1430.3745 | 1434.2287 | 1435.4669 |
| Frequencies -- | 1437.4043 | 1447.2494 | 1448.9263 |
| Frequencies -- | 1454.8861 | 1459.9073 | 1465.5990 |
| Frequencies -- | 1466.5459 | 1469.9003 | 1470.0010 |
| Frequencies -- | 1472.0239 | 1472.9144 | 1481.4401 |
| Frequencies -- | 1493.1450 | 1495.5848 | 1499.3392 |
| Frequencies -- | 1502.0127 | 1507.2789 | 1509.3382 |
| Frequencies -- | 1514.2132 | 1516.6547 | 1519.2220 |
| Frequencies -- | 1578.8089 | 1594.9578 | 1596.2007 |
| Frequencies -- | 1597.1038 | 1597.9419 | 1620.6080 |
| Frequencies -- | 1621.0667 | 1622.8604 | 2991.0160 |
| Frequencies -- | 3003.8670 | 3012.3958 | 3012.8186 |
| Frequencies -- | 3013.8959 | 3015.2890 | 3016.9908 |
| Frequencies -- | 3104.7421 | 3106.6797 | 3107.4799 |
| Frequencies -- | 3110.3104 | 3110.4539 | 3115.5053 |
| Frequencies -- | 3135.6249 | 3142.9083 | 3144.9839 |
| Frequencies -- | 3148.2641 | 3152.9584 | 3156.4699 |
| Frequencies -- | 3164.9524 | 3175.6539 | 3175.9981 |
| Frequencies -- | 3190.5561 | 3206.1560 | 3213.9486 |

### proximal conformation

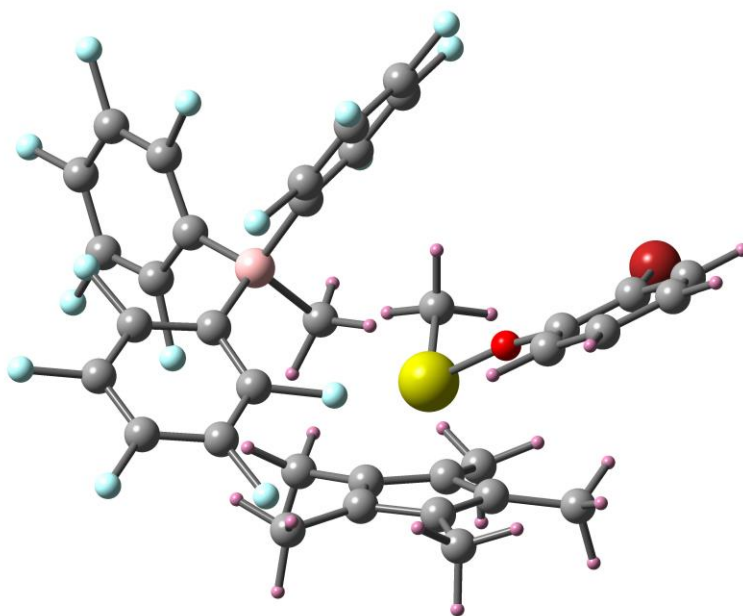

| vacuum        | toluene-like solvent | D3 dispersion |
|---------------|----------------------|---------------|
| -3054.9633056 | -3054.9745635        | -0.55652851   |

|    |            |             |             |
|----|------------|-------------|-------------|
| Ti | 2.01356600 | -1.54316800 | -0.24822500 |
| C  | 2.24942400 | -1.58850200 | -2.31305000 |
| H  | 1.94416900 | -0.57045200 | -2.61468400 |
| H  | 3.29355600 | -1.74027200 | -2.61803700 |
| H  | 1.60800400 | -2.33899900 | -2.80049600 |
| O  | 2.94343800 | -0.06388300 | 0.14236100  |
| C  | 3.60664600 | 1.00455300  | 0.70636900  |

|   |             |             |             |
|---|-------------|-------------|-------------|
| C | 4.73328100  | 1.60314100  | 0.07912000  |
| C | 3.12818300  | 1.55044000  | 1.92732100  |
| C | 5.36634900  | 2.71836400  | 0.66536500  |
| C | 3.75944000  | 2.66416900  | 2.50906400  |
| C | 4.88099000  | 3.24858700  | 1.88005200  |
| H | 6.22573000  | 3.17295900  | 0.17233000  |
| H | 3.37192900  | 3.07602000  | 3.44248100  |
| C | 2.52240800  | -2.86298500 | 1.65262200  |
| C | 1.32520100  | -3.47881900 | 1.11660000  |
| C | 3.57910100  | -3.02481300 | 0.67695300  |
| C | 1.63866400  | -4.01419300 | -0.18883100 |
| C | 3.03145400  | -3.74595700 | -0.46009600 |
| F | 0.02558900  | 5.95368100  | -0.85107800 |
| C | -0.40822500 | 4.64837600  | -0.66979700 |
| C | -1.24191500 | 4.31334500  | 0.40830900  |
| C | -0.02363600 | 3.63568700  | -1.56427500 |
| C | -1.66884500 | 2.97900300  | 0.57629300  |
| F | -1.64335900 | 5.30194000  | 1.29979500  |
| C | -0.47374500 | 2.32229900  | -1.34633400 |
| F | 0.79067900  | 3.94149900  | -2.64962500 |
| C | -1.30153500 | 1.91049000  | -0.27388400 |
| F | -2.52684300 | 2.77293700  | 1.66420100  |
| F | -0.07324400 | 1.38489400  | -2.31941200 |
| B | -1.73233200 | 0.31144100  | -0.07663600 |
| C | -2.45422600 | 0.02643400  | 1.39982500  |
| C | -2.68400800 | -0.24568100 | -1.32660100 |
| C | -0.26063000 | -0.57864000 | -0.13660800 |
| C | -3.85028200 | -0.12070900 | 1.58657800  |
| C | -1.73087900 | -0.08565100 | 2.60842700  |
| C | -3.38331800 | 0.57094200  | -2.24702900 |
| C | -2.86966300 | -1.62562200 | -1.56890700 |
| H | 0.42603900  | 0.02129500  | 0.47459000  |
| H | -0.48260100 | -1.56477400 | 0.27887500  |
| H | 0.00905300  | -0.60762600 | -1.20083900 |
| C | -4.46756300 | -0.39042300 | 2.82520800  |
| F | -4.73225200 | 0.03660900  | 0.51276900  |
| C | -2.29200600 | -0.35353000 | 3.86960900  |
| F | -0.32796300 | 0.10775200  | 2.62376200  |
| C | -4.14726500 | 0.08066400  | -3.32564100 |
| F | -3.38478600 | 1.96246300  | -2.10914600 |
| C | -3.62183400 | -2.17021800 | -2.62512500 |
| F | -2.30510700 | -2.57854400 | -0.69076800 |
| C | -3.68170100 | -0.51656200 | 3.98216500  |
| F | -5.84707800 | -0.52668500 | 2.91455000  |
| F | -1.48364000 | -0.45926900 | 4.99999900  |
| C | -4.26437500 | -1.30461000 | -3.52460100 |
| F | -4.79521400 | 0.95473500  | -4.18961900 |
| F | -3.73474500 | -3.54934900 | -2.78296800 |
| F | -4.26448700 | -0.78905000 | 5.21096300  |
| F | -5.00778300 | -1.80894300 | -4.58157100 |
| C | 3.83644600  | -4.31428700 | -1.60364800 |
| H | 4.72552500  | -3.71116600 | -1.83000400 |
| H | 4.18860000  | -5.32558600 | -1.33517900 |
| H | 3.25109500  | -4.40955800 | -2.52682600 |
| C | 5.03702100  | -2.67686100 | 0.87290100  |
| H | 5.58602200  | -3.56577300 | 1.22927100  |
| H | 5.51951800  | -2.34550900 | -0.05621800 |

|    |             |             |             |
|----|-------------|-------------|-------------|
| H  | 5.17876300  | -1.88530100 | 1.61911000  |
| C  | 0.70052700  | -4.81301900 | -1.06352800 |
| H  | 0.99299900  | -4.78501700 | -2.12132000 |
| H  | 0.71180700  | -5.87278600 | -0.75344200 |
| H  | -0.33904500 | -4.46863800 | -0.99153600 |
| C  | 0.04218800  | -3.70693200 | 1.88406400  |
| H  | -0.83268200 | -3.81132500 | 1.23120200  |
| H  | 0.13129400  | -4.64581900 | 2.45810500  |
| H  | -0.16409500 | -2.90896300 | 2.60797200  |
| C  | 2.66819100  | -2.30276300 | 3.04943700  |
| H  | 2.87412900  | -3.12453100 | 3.75731500  |
| H  | 3.49900100  | -1.59058900 | 3.13063600  |
| H  | 1.75691300  | -1.79914000 | 3.39917000  |
| H  | 5.37436300  | 4.11577200  | 2.32161200  |
| Br | 5.42355400  | 0.91461800  | -1.61894200 |
| H  | 2.25411900  | 1.10139300  | 2.39747300  |

|                |          |          |          |
|----------------|----------|----------|----------|
| Frequencies -- | 2.7252   | 10.4610  | 14.7560  |
| Frequencies -- | 16.2203  | 21.7315  | 22.9619  |
| Frequencies -- | 26.1789  | 29.3697  | 31.7139  |
| Frequencies -- | 37.3283  | 40.0784  | 43.6930  |
| Frequencies -- | 51.6663  | 59.6754  | 71.4729  |
| Frequencies -- | 91.2509  | 97.3625  | 103.2921 |
| Frequencies -- | 105.2838 | 107.8090 | 113.0869 |
| Frequencies -- | 117.3257 | 117.7108 | 118.7948 |
| Frequencies -- | 120.9141 | 124.4194 | 132.2284 |
| Frequencies -- | 138.4585 | 140.1699 | 149.8905 |
| Frequencies -- | 150.6957 | 153.3231 | 155.8763 |
| Frequencies -- | 157.1828 | 159.7315 | 160.7931 |
| Frequencies -- | 161.3917 | 168.5640 | 173.4091 |
| Frequencies -- | 181.4653 | 202.1010 | 210.3851 |
| Frequencies -- | 214.5841 | 216.7456 | 219.0612 |
| Frequencies -- | 225.7442 | 238.3119 | 256.0105 |
| Frequencies -- | 264.8837 | 265.0117 | 265.2842 |
| Frequencies -- | 268.9760 | 272.3004 | 279.5905 |
| Frequencies -- | 281.5576 | 284.2078 | 288.4470 |
| Frequencies -- | 289.9722 | 291.0620 | 297.6757 |
| Frequencies -- | 302.5267 | 307.6946 | 311.5700 |
| Frequencies -- | 319.0490 | 325.8202 | 330.1884 |
| Frequencies -- | 333.4974 | 336.5332 | 347.0863 |
| Frequencies -- | 353.7470 | 379.2140 | 379.5497 |
| Frequencies -- | 380.2649 | 386.0195 | 387.5756 |
| Frequencies -- | 390.1724 | 391.3683 | 417.6654 |
| Frequencies -- | 431.9791 | 432.8681 | 433.1553 |
| Frequencies -- | 448.0518 | 451.5617 | 456.2296 |
| Frequencies -- | 457.5934 | 472.9440 | 490.6996 |
| Frequencies -- | 515.5565 | 529.7601 | 535.5210 |
| Frequencies -- | 540.8541 | 541.2796 | 542.3639 |
| Frequencies -- | 547.9548 | 553.7199 | 572.9421 |
| Frequencies -- | 582.1941 | 591.8664 | 596.1738 |
| Frequencies -- | 599.8627 | 609.7297 | 629.8844 |
| Frequencies -- | 631.5484 | 638.3330 | 638.8425 |
| Frequencies -- | 641.5622 | 661.2368 | 663.2588 |
| Frequencies -- | 669.1955 | 694.1051 | 702.1521 |
| Frequencies -- | 710.8523 | 726.6775 | 729.0877 |
| Frequencies -- | 741.9191 | 757.5569 | 759.0964 |
| Frequencies -- | 768.3590 | 770.2155 | 799.9409 |
| Frequencies -- | 803.3122 | 838.7794 | 859.4933 |
| Frequencies -- | 866.8018 | 869.8516 | 906.1780 |
| Frequencies -- | 907.2437 | 910.5932 | 927.2833 |
| Frequencies -- | 960.2487 | 967.2148 | 972.2039 |



|                |           |           |           |
|----------------|-----------|-----------|-----------|
| Frequencies -- | 995.7608  | 1009.7928 | 1023.8462 |
| Frequencies -- | 1024.0139 | 1028.6388 | 1042.5819 |
| Frequencies -- | 1042.9383 | 1045.9004 | 1046.1616 |
| Frequencies -- | 1047.1788 | 1049.0138 | 1049.3374 |
| Frequencies -- | 1051.6736 | 1053.9017 | 1075.1695 |
| Frequencies -- | 1088.7854 | 1090.0990 | 1095.5504 |
| Frequencies -- | 1126.2749 | 1131.1373 | 1135.9187 |
| Frequencies -- | 1171.0226 | 1175.5354 | 1185.5587 |
| Frequencies -- | 1190.4643 | 1213.9301 | 1215.3691 |
| Frequencies -- | 1216.2448 | 1251.2180 | 1277.4726 |
| Frequencies -- | 1318.9486 | 1321.4703 | 1326.3574 |
| Frequencies -- | 1339.0075 | 1341.6880 | 1345.3809 |
| Frequencies -- | 1358.2668 | 1409.8579 | 1414.1048 |
| Frequencies -- | 1417.3459 | 1417.8908 | 1420.2540 |
| Frequencies -- | 1421.6840 | 1426.7689 | 1428.0918 |
| Frequencies -- | 1428.4058 | 1429.8274 | 1435.6001 |
| Frequencies -- | 1436.2096 | 1439.4665 | 1447.3895 |
| Frequencies -- | 1454.2086 | 1458.3977 | 1463.9781 |
| Frequencies -- | 1467.9483 | 1469.4710 | 1469.9713 |
| Frequencies -- | 1471.8600 | 1478.0898 | 1480.3785 |
| Frequencies -- | 1491.9059 | 1494.3451 | 1499.2689 |
| Frequencies -- | 1499.4807 | 1504.3249 | 1507.3458 |
| Frequencies -- | 1511.9572 | 1517.4850 | 1518.0515 |
| Frequencies -- | 1579.4489 | 1595.6688 | 1595.9676 |
| Frequencies -- | 1596.6568 | 1597.5884 | 1620.4738 |
| Frequencies -- | 1620.8734 | 1622.5467 | 2991.9111 |
| Frequencies -- | 3010.7965 | 3011.6411 | 3011.8541 |
| Frequencies -- | 3012.9057 | 3014.4593 | 3016.4511 |
| Frequencies -- | 3104.1002 | 3104.6060 | 3106.6634 |
| Frequencies -- | 3107.6481 | 3113.3022 | 3113.6960 |
| Frequencies -- | 3143.2136 | 3144.5364 | 3146.2295 |
| Frequencies -- | 3148.6070 | 3150.3828 | 3152.6350 |
| Frequencies -- | 3161.6340 | 3177.1679 | 3191.5717 |
| Frequencies -- | 3192.2301 | 3207.1016 | 3218.0741 |

**Catalyst 21:****distal conformation**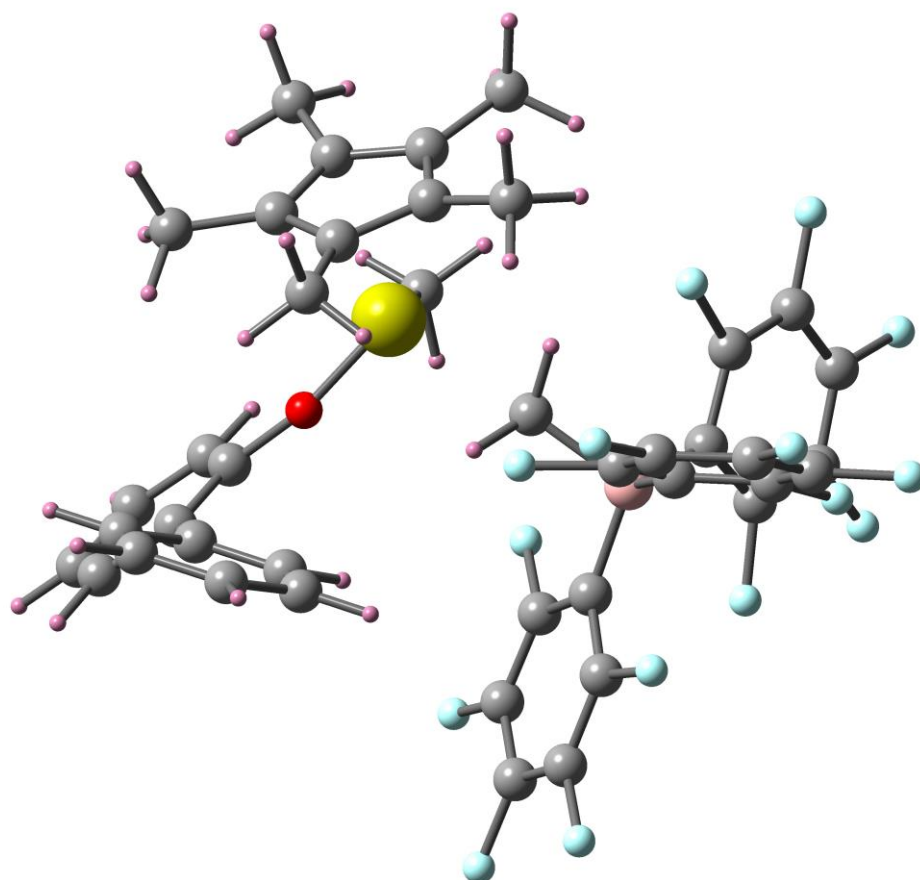

| <b>vacuum</b> | <b>toluene-like solvent</b> | <b>D3 dispersion</b> |
|---------------|-----------------------------|----------------------|
| -3273.3520166 | -3273.3635289               | -0.62568555          |

|    |             |             |             |
|----|-------------|-------------|-------------|
| Ti | -1.87654100 | -1.58790900 | 0.03347900  |
| C  | -2.27218200 | -1.56819200 | 2.07772900  |
| H  | -1.97323500 | -0.55011200 | 2.38208100  |
| H  | -3.34326900 | -1.68694700 | 2.29246600  |
| H  | -1.69485400 | -2.31657500 | 2.64111100  |
| O  | -2.77666800 | -0.13940400 | -0.49241500 |
| C  | -3.41927900 | 0.85102900  | -1.22882400 |
| C  | -4.61016400 | 1.46980900  | -0.74116400 |
| C  | -2.86061900 | 1.21765000  | -2.47994900 |
| C  | -5.23302200 | 2.42508000  | -1.58760300 |
| C  | -3.49235600 | 2.18418800  | -3.28276500 |
| C  | -4.69351000 | 2.78119600  | -2.83996100 |
| H  | -6.13998700 | 2.91696600  | -1.23262100 |
| H  | -3.04932200 | 2.46710700  | -4.23955000 |
| C  | -2.13626900 | -3.00928200 | -1.84826200 |

|   |             |             |             |
|---|-------------|-------------|-------------|
| C | -1.01809300 | -3.58589300 | -1.12894500 |
| C | -3.31033300 | -3.12601400 | -1.01031000 |
| C | -1.49871300 | -4.05951400 | 0.14819400  |
| C | -2.91379200 | -3.78397200 | 0.22412900  |
| F | -0.04335600 | 5.98802700  | -0.18477300 |
| C | 0.41835600  | 4.68291600  | -0.09570200 |
| C | 1.51180300  | 4.25362100  | -0.86460200 |
| C | -0.19337300 | 3.76411100  | 0.77184000  |
| C | 1.95847000  | 2.91938900  | -0.76445200 |
| F | 2.14687800  | 5.15038600  | -1.71593100 |
| C | 0.29341100  | 2.44686100  | 0.83212300  |
| F | -1.27280900 | 4.15963000  | 1.55846900  |
| C | 1.36682300  | 1.93719600  | 0.06452600  |
| F | 3.08277100  | 2.61857500  | -1.54260600 |
| F | -0.35489100 | 1.62205900  | 1.77583000  |
| B | 1.83009600  | 0.33624800  | 0.14512600  |
| C | 2.77603400  | -0.09638300 | -1.15841600 |
| C | 2.56174800  | -0.03876700 | 1.59505300  |
| C | 0.39283400  | -0.60193700 | 0.06832400  |
| C | 4.16737700  | -0.34979200 | -1.10447300 |
| C | 2.24525500  | -0.24543900 | -2.45984000 |
| C | 3.06604000  | 0.90278800  | 2.52296400  |
| C | 2.73187400  | -1.37556700 | 2.02424400  |
| H | -0.20602900 | -0.11738200 | -0.71537300 |
| H | 0.70215200  | -1.61910900 | -0.17925700 |
| H | -0.04379600 | -0.51864900 | 1.07255000  |
| C | 4.94890600  | -0.74979600 | -2.20822400 |
| F | 4.87969800  | -0.17859700 | 0.08708000  |
| C | 2.97557300  | -0.64003300 | -3.59445000 |
| F | 0.88271000  | 0.04167900  | -2.70813100 |
| C | 3.64256200  | 0.56650600  | 3.76541700  |
| F | 3.04870400  | 2.27178600  | 2.23533000  |
| C | 3.30131500  | -1.76778300 | 3.24840500  |
| F | 2.35277500  | -2.44193500 | 1.17861000  |
| C | 4.34872400  | -0.90415900 | -3.46818800 |
| F | 6.31038600  | -0.98638800 | -2.06342300 |
| F | 2.35140000  | -0.77095000 | -4.83338400 |
| C | 3.75800200  | -0.78213800 | 4.13832000  |
| F | 4.10552600  | 1.55768300  | 4.62235800  |
| F | 3.41920600  | -3.11477600 | 3.58131900  |
| F | 5.09574800  | -1.30339100 | -4.56690000 |
| F | 4.31862900  | -1.13586400 | 5.35706000  |
| C | -3.86015400 | -4.28791000 | 1.28735000  |
| H | -4.77137600 | -3.67951200 | 1.35694800  |
| H | -4.17277000 | -5.31768500 | 1.04113800  |
| H | -3.40028800 | -4.31795900 | 2.28308100  |
| C | -4.73224400 | -2.79840200 | -1.40662100 |
| H | -5.23038800 | -3.70678300 | -1.78764500 |
| H | -5.32801500 | -2.43009100 | -0.56041800 |
| H | -4.78051300 | -2.04155700 | -2.19917800 |
| C | -0.67806700 | -4.80527000 | 1.17485500  |
| H | -1.12887000 | -4.76658600 | 2.17465800  |
| H | -0.60464400 | -5.87075100 | 0.89430200  |
| H | 0.34842000  | -4.42271900 | 1.25288500  |
| C | 0.35651100  | -3.84372200 | -1.70437400 |
| H | 1.13843700  | -3.88467700 | -0.93579300 |
| H | 0.35486400  | -4.82277200 | -2.21476100 |

|   |             |             |             |
|---|-------------|-------------|-------------|
| H | 0.64935800  | -3.09466800 | -2.45016200 |
| C | -2.09826900 | -2.53072700 | -3.28216600 |
| H | -2.17414900 | -3.39683600 | -3.96254500 |
| H | -2.93129700 | -1.85838200 | -3.52086800 |
| H | -1.16296000 | -2.01011700 | -3.52983200 |
| H | -1.93524300 | 0.74809000  | -2.81029000 |
| H | -5.19401000 | 3.53208400  | -3.45384800 |
| C | -5.20515100 | 1.19212500  | 0.60720300  |
| C | -4.48255600 | 1.47248900  | 1.79655700  |
| C | -6.54254300 | 0.72894700  | 0.72240400  |
| C | -5.08135300 | 1.29596300  | 3.06136000  |
| H | -3.46445800 | 1.85792300  | 1.73354700  |
| C | -7.13912100 | 0.54107100  | 1.98773700  |
| H | -7.11583000 | 0.51174800  | -0.18177800 |
| C | -6.40992600 | 0.82645800  | 3.16335000  |
| H | -4.51346700 | 1.53469000  | 3.96356900  |
| H | -8.16892100 | 0.18196200  | 2.05373800  |
| H | -6.87231200 | 0.69378300  | 4.14407500  |

|                |          |          |          |
|----------------|----------|----------|----------|
| Frequencies -- | 4.9018   | 9.0469   | 14.6843  |
| Frequencies -- | 15.3866  | 22.1479  | 26.6203  |
| Frequencies -- | 28.4783  | 30.0735  | 31.5098  |
| Frequencies -- | 37.5028  | 42.3093  | 42.5847  |
| Frequencies -- | 43.5189  | 62.5016  | 66.6819  |
| Frequencies -- | 73.0574  | 81.4802  | 83.8387  |
| Frequencies -- | 88.0525  | 101.0077 | 103.3972 |
| Frequencies -- | 105.0032 | 107.8199 | 114.4730 |
| Frequencies -- | 117.8710 | 119.0539 | 122.0314 |
| Frequencies -- | 128.2426 | 129.6437 | 135.5807 |
| Frequencies -- | 138.6230 | 139.5581 | 142.3454 |
| Frequencies -- | 149.8248 | 153.5118 | 157.4945 |
| Frequencies -- | 159.8659 | 160.3999 | 162.7621 |
| Frequencies -- | 165.5091 | 169.5152 | 190.9314 |
| Frequencies -- | 201.3063 | 204.8600 | 215.6975 |
| Frequencies -- | 216.1279 | 220.1496 | 234.4653 |
| Frequencies -- | 252.7662 | 261.8503 | 263.6080 |
| Frequencies -- | 264.7872 | 264.9323 | 265.6716 |
| Frequencies -- | 274.1406 | 277.7117 | 277.8507 |
| Frequencies -- | 284.5831 | 290.8290 | 293.2749 |
| Frequencies -- | 295.5122 | 301.6795 | 304.1985 |
| Frequencies -- | 305.7896 | 310.9250 | 311.5835 |
| Frequencies -- | 320.0932 | 329.4254 | 333.4793 |
| Frequencies -- | 334.0492 | 337.5358 | 350.2303 |
| Frequencies -- | 365.8133 | 378.7351 | 379.1467 |
| Frequencies -- | 380.2093 | 384.2456 | 387.5412 |
| Frequencies -- | 391.7699 | 396.9272 | 410.6113 |
| Frequencies -- | 417.7541 | 431.8562 | 432.7373 |
| Frequencies -- | 433.5804 | 450.4363 | 456.2209 |
| Frequencies -- | 457.5021 | 470.2976 | 472.6697 |
| Frequencies -- | 499.1622 | 506.2973 | 530.8680 |
| Frequencies -- | 535.9055 | 540.1220 | 540.5975 |
| Frequencies -- | 542.6480 | 548.1429 | 557.2206 |
| Frequencies -- | 561.2503 | 578.4438 | 583.0524 |
| Frequencies -- | 589.8941 | 596.5423 | 600.8137 |
| Frequencies -- | 614.4908 | 614.8851 | 621.9606 |
| Frequencies -- | 630.7023 | 637.8098 | 638.6818 |
| Frequencies -- | 641.5184 | 651.9804 | 658.0965 |
| Frequencies -- | 663.0546 | 691.7753 | 697.0737 |
| Frequencies -- | 713.4052 | 725.5597 | 729.4046 |
| Frequencies -- | 735.5996 | 742.1057 | 744.4446 |
| Frequencies -- | 755.2935 | 759.7700 | 767.6011 |

|                |           |           |           |
|----------------|-----------|-----------|-----------|
| Frequencies -- | 770.2826  | 780.8825  | 802.9504  |
| Frequencies -- | 806.8027  | 842.2494  | 854.3314  |
| Frequencies -- | 864.5624  | 865.8093  | 878.6953  |
| Frequencies -- | 905.5441  | 908.5562  | 911.1547  |
| Frequencies -- | 923.1765  | 938.6945  | 963.7136  |
| Frequencies -- | 971.1148  | 975.4099  | 991.2563  |
| Frequencies -- | 995.3562  | 1000.5157 | 1005.9466 |
| Frequencies -- | 1009.5720 | 1020.7130 | 1024.7900 |
| Frequencies -- | 1036.9450 | 1041.2894 | 1043.7961 |
| Frequencies -- | 1046.7450 | 1047.2067 | 1047.5932 |
| Frequencies -- | 1048.3149 | 1048.9263 | 1050.4351 |
| Frequencies -- | 1051.8519 | 1063.0374 | 1071.5448 |
| Frequencies -- | 1087.5579 | 1090.5040 | 1090.8022 |
| Frequencies -- | 1091.8001 | 1126.2038 | 1128.4184 |
| Frequencies -- | 1137.1528 | 1172.6885 | 1175.0465 |
| Frequencies -- | 1185.9759 | 1187.0042 | 1190.0917 |
| Frequencies -- | 1208.7778 | 1213.9890 | 1215.0238 |
| Frequencies -- | 1215.6447 | 1220.9091 | 1264.6514 |
| Frequencies -- | 1300.8595 | 1317.5425 | 1321.6844 |
| Frequencies -- | 1326.9300 | 1335.4702 | 1338.8065 |
| Frequencies -- | 1341.2715 | 1344.9303 | 1359.3698 |
| Frequencies -- | 1371.2330 | 1412.4908 | 1416.1779 |
| Frequencies -- | 1417.1933 | 1417.6658 | 1419.8141 |
| Frequencies -- | 1425.7514 | 1427.3606 | 1429.1437 |
| Frequencies -- | 1430.8799 | 1434.2856 | 1434.8573 |
| Frequencies -- | 1437.5542 | 1447.1104 | 1452.0227 |
| Frequencies -- | 1453.4987 | 1454.6481 | 1459.8501 |
| Frequencies -- | 1465.6339 | 1468.9284 | 1469.6721 |
| Frequencies -- | 1471.1856 | 1472.6828 | 1480.3598 |
| Frequencies -- | 1481.3333 | 1494.3692 | 1495.0791 |
| Frequencies -- | 1500.7575 | 1501.5457 | 1507.4208 |
| Frequencies -- | 1508.1714 | 1508.6640 | 1513.8396 |
| Frequencies -- | 1515.8771 | 1520.3642 | 1578.5443 |
| Frequencies -- | 1595.4417 | 1596.0573 | 1596.9491 |
| Frequencies -- | 1597.4853 | 1612.5645 | 1619.7718 |
| Frequencies -- | 1620.3437 | 1622.0120 | 1623.0226 |
| Frequencies -- | 2993.8934 | 3004.4913 | 3011.5108 |
| Frequencies -- | 3011.9079 | 3012.8940 | 3014.8111 |
| Frequencies -- | 3016.4352 | 3103.7927 | 3105.6003 |
| Frequencies -- | 3107.8809 | 3111.4920 | 3112.2675 |
| Frequencies -- | 3114.1499 | 3138.3655 | 3141.2917 |
| Frequencies -- | 3146.0142 | 3151.0308 | 3153.3986 |
| Frequencies -- | 3157.1165 | 3160.3967 | 3164.0092 |
| Frequencies -- | 3169.1999 | 3170.2098 | 3176.6072 |
| Frequencies -- | 3181.0926 | 3182.6681 | 3192.2971 |
| Frequencies -- | 3199.0465 | 3208.9658 | 3223.8367 |

**proximal conformation**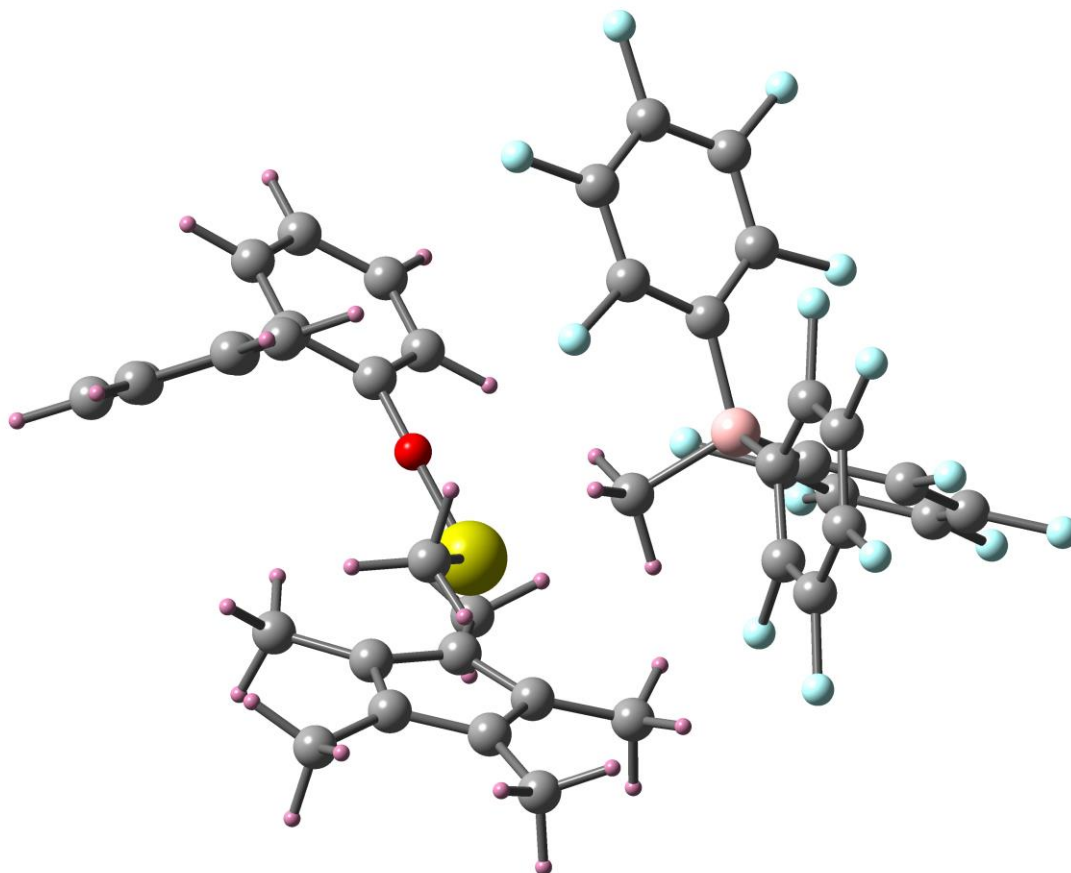

| <b>vacuum</b> | <b>toluene-like solvent</b> | <b>D3 dispersion</b> |
|---------------|-----------------------------|----------------------|
| -3273.3540006 | -3273.3659841               | -0.62568555          |

|    |             |             |             |
|----|-------------|-------------|-------------|
| Ti | -1.87654100 | -1.58790900 | 0.03347900  |
| C  | -2.27218200 | -1.56819200 | 2.07772900  |
| H  | -1.97323500 | -0.55011200 | 2.38208100  |
| H  | -3.34326900 | -1.68694700 | 2.29246600  |
| H  | -1.69485400 | -2.31657500 | 2.64111100  |
| O  | -2.77666800 | -0.13940400 | -0.49241500 |
| C  | -3.41927900 | 0.85102900  | -1.22882400 |
| C  | -4.61016400 | 1.46980900  | -0.74116400 |
| C  | -2.86061900 | 1.21765000  | -2.47994900 |
| C  | -5.23302200 | 2.42508000  | -1.58760300 |
| C  | -3.49235600 | 2.18418800  | -3.28276500 |
| C  | -4.69351000 | 2.78119600  | -2.83996100 |
| H  | -6.13998700 | 2.91696600  | -1.23262100 |
| H  | -3.04932200 | 2.46710700  | -4.23955000 |
| C  | -2.13626900 | -3.00928200 | -1.84826200 |
| C  | -1.01809300 | -3.58589300 | -1.12894500 |
| C  | -3.31033300 | -3.12601400 | -1.01031000 |
| C  | -1.49871300 | -4.05951400 | 0.14819400  |
| C  | -2.91379200 | -3.78397200 | 0.22412900  |

|   |             |             |             |
|---|-------------|-------------|-------------|
| F | -0.04335600 | 5.98802700  | -0.18477300 |
| C | 0.41835600  | 4.68291600  | -0.09570200 |
| C | 1.51180300  | 4.25362100  | -0.86460200 |
| C | -0.19337300 | 3.76411100  | 0.77184000  |
| C | 1.95847000  | 2.91938900  | -0.76445200 |
| F | 2.14687800  | 5.15038600  | -1.71593100 |
| C | 0.29341100  | 2.44686100  | 0.83212300  |
| F | -1.27280900 | 4.15963000  | 1.55846900  |
| C | 1.36682300  | 1.93719600  | 0.06452600  |
| F | 3.08277100  | 2.61857500  | -1.54260600 |
| F | -0.35489100 | 1.62205900  | 1.77583000  |
| B | 1.83009600  | 0.33624800  | 0.14512600  |
| C | 2.77603400  | -0.09638300 | -1.15841600 |
| C | 2.56174800  | -0.03876700 | 1.59505300  |
| C | 0.39283400  | -0.60193700 | 0.06832400  |
| C | 4.16737700  | -0.34979200 | -1.10447300 |
| C | 2.24525500  | -0.24543900 | -2.45984000 |
| C | 3.06604000  | 0.90278800  | 2.52296400  |
| C | 2.73187400  | -1.37556700 | 2.02424400  |
| H | -0.20602900 | -0.11738200 | -0.71537300 |
| H | 0.70215200  | -1.61910900 | -0.17925700 |
| H | -0.04379600 | -0.51864900 | 1.07255000  |
| C | 4.94890600  | -0.74979600 | -2.20822400 |
| F | 4.87969800  | -0.17859700 | 0.08708000  |
| C | 2.97557300  | -0.64003300 | -3.59445000 |
| F | 0.88271000  | 0.04167900  | -2.70813100 |
| C | 3.64256200  | 0.56650600  | 3.76541700  |
| F | 3.04870400  | 2.27178600  | 2.23533000  |
| C | 3.30131500  | -1.76778300 | 3.24840500  |
| F | 2.35277500  | -2.44193500 | 1.17861000  |
| C | 4.34872400  | -0.90415900 | -3.46818800 |
| F | 6.31038600  | -0.98638800 | -2.06342300 |
| F | 2.35140000  | -0.77095000 | -4.83338400 |
| C | 3.75800200  | -0.78213800 | 4.13832000  |
| F | 4.10552600  | 1.55768300  | 4.62235800  |
| F | 3.41920600  | -3.11477600 | 3.58131900  |
| F | 5.09574800  | -1.30339100 | -4.56690000 |
| F | 4.31862900  | -1.13586400 | 5.35706000  |
| C | -3.86015400 | -4.28791000 | 1.28735000  |
| H | -4.77137600 | -3.67951200 | 1.35694800  |
| H | -4.17277000 | -5.31768500 | 1.04113800  |
| H | -3.40028800 | -4.31795900 | 2.28308100  |
| C | -4.73224400 | -2.79840200 | -1.40662100 |
| H | -5.23038800 | -3.70678300 | -1.78764500 |
| H | -5.32801500 | -2.43009100 | -0.56041800 |
| H | -4.78051300 | -2.04155700 | -2.19917800 |
| C | -0.67806700 | -4.80527000 | 1.17485500  |
| H | -1.12887000 | -4.76658600 | 2.17465800  |
| H | -0.60464400 | -5.87075100 | 0.89430200  |
| H | 0.34842000  | -4.42271900 | 1.25288500  |
| C | 0.35651100  | -3.84372200 | -1.70437400 |
| H | 1.13843700  | -3.88467700 | -0.93579300 |
| H | 0.35486400  | -4.82277200 | -2.21476100 |
| H | 0.64935800  | -3.09466800 | -2.45016200 |
| C | -2.09826900 | -2.53072700 | -3.28216600 |
| H | -2.17414900 | -3.39683600 | -3.96254500 |
| H | -2.93129700 | -1.85838200 | -3.52086800 |

|   |             |             |             |
|---|-------------|-------------|-------------|
| H | -1.16296000 | -2.01011700 | -3.52983200 |
| H | -1.93524300 | 0.74809000  | -2.81029000 |
| H | -5.19401000 | 3.53208400  | -3.45384800 |
| C | -5.20515100 | 1.19212500  | 0.60720300  |
| C | -4.48255600 | 1.47248900  | 1.79655700  |
| C | -6.54254300 | 0.72894700  | 0.72240400  |
| C | -5.08135300 | 1.29596300  | 3.06136000  |
| H | -3.46445800 | 1.85792300  | 1.73354700  |
| C | -7.13912100 | 0.54107100  | 1.98773700  |
| H | -7.11583000 | 0.51174800  | -0.18177800 |
| C | -6.40992600 | 0.82645800  | 3.16335000  |
| H | -4.51346700 | 1.53469000  | 3.96356900  |
| H | -8.16892100 | 0.18196200  | 2.05373800  |
| H | -6.87231200 | 0.69378300  | 4.14407500  |

|                |          |          |          |
|----------------|----------|----------|----------|
| Frequencies -- | 7.7461   | 11.7983  | 12.3823  |
| Frequencies -- | 16.3378  | 20.5082  | 25.4906  |
| Frequencies -- | 28.1619  | 29.4661  | 30.3087  |
| Frequencies -- | 35.3867  | 39.1274  | 40.5669  |
| Frequencies -- | 44.5527  | 54.4601  | 61.4821  |
| Frequencies -- | 70.4921  | 86.9654  | 90.0311  |
| Frequencies -- | 90.8664  | 103.2498 | 104.8692 |
| Frequencies -- | 107.2058 | 117.4478 | 118.1089 |
| Frequencies -- | 118.9516 | 122.8630 | 123.5223 |
| Frequencies -- | 127.6795 | 135.1574 | 135.5927 |
| Frequencies -- | 140.1948 | 141.8873 | 152.0766 |
| Frequencies -- | 152.6594 | 156.3030 | 157.0892 |
| Frequencies -- | 160.5087 | 161.0658 | 165.9811 |
| Frequencies -- | 170.9905 | 175.2764 | 189.7588 |
| Frequencies -- | 208.0775 | 210.8014 | 216.3716 |
| Frequencies -- | 217.7938 | 219.0252 | 239.5120 |
| Frequencies -- | 252.5991 | 259.3185 | 264.3491 |
| Frequencies -- | 264.4073 | 265.3385 | 268.3594 |
| Frequencies -- | 273.5318 | 279.9847 | 283.7279 |
| Frequencies -- | 285.9096 | 290.8495 | 291.5527 |
| Frequencies -- | 292.6953 | 297.2348 | 301.7575 |
| Frequencies -- | 306.6990 | 309.3518 | 316.1483 |
| Frequencies -- | 319.2067 | 330.6567 | 333.5892 |
| Frequencies -- | 336.5655 | 344.2633 | 348.6399 |
| Frequencies -- | 360.0390 | 378.8346 | 379.0793 |
| Frequencies -- | 379.4732 | 387.1417 | 390.5483 |
| Frequencies -- | 392.5743 | 394.9139 | 406.9081 |
| Frequencies -- | 418.2878 | 432.5900 | 433.0075 |
| Frequencies -- | 433.1168 | 451.5079 | 456.1789 |
| Frequencies -- | 457.5462 | 472.6059 | 473.5531 |
| Frequencies -- | 499.5599 | 518.6670 | 531.8952 |
| Frequencies -- | 536.7941 | 541.3931 | 542.1247 |
| Frequencies -- | 547.9813 | 548.8647 | 556.7487 |
| Frequencies -- | 562.3012 | 581.4004 | 583.3728 |
| Frequencies -- | 592.5233 | 595.6668 | 604.9636 |
| Frequencies -- | 613.7595 | 616.2907 | 620.5866 |
| Frequencies -- | 630.3330 | 638.3208 | 638.9453 |
| Frequencies -- | 641.7370 | 649.8568 | 660.8467 |
| Frequencies -- | 662.9110 | 694.6223 | 698.0665 |
| Frequencies -- | 712.4768 | 727.9276 | 728.2283 |
| Frequencies -- | 739.5130 | 741.8194 | 743.8226 |
| Frequencies -- | 757.4168 | 758.1344 | 767.4683 |
| Frequencies -- | 770.4420 | 780.2040 | 802.9444 |
| Frequencies -- | 805.6049 | 842.7166 | 856.1540 |
| Frequencies -- | 866.0797 | 869.1475 | 878.2054 |
| Frequencies -- | 906.8473 | 907.5761 | 909.7199 |



|                |           |           |           |
|----------------|-----------|-----------|-----------|
| Frequencies -- | 922.3779  | 937.7556  | 962.2826  |
| Frequencies -- | 970.9836  | 974.2373  | 990.3272  |
| Frequencies -- | 994.9739  | 999.3008  | 1008.1981 |
| Frequencies -- | 1008.8786 | 1023.7405 | 1024.3681 |
| Frequencies -- | 1035.6445 | 1042.1445 | 1044.0780 |
| Frequencies -- | 1046.0465 | 1046.8640 | 1048.0487 |
| Frequencies -- | 1049.2711 | 1049.4602 | 1050.5949 |
| Frequencies -- | 1051.5173 | 1062.4340 | 1072.9660 |
| Frequencies -- | 1089.9635 | 1090.8276 | 1091.8839 |
| Frequencies -- | 1098.2165 | 1126.6476 | 1128.2965 |
| Frequencies -- | 1137.4574 | 1173.1300 | 1175.7132 |
| Frequencies -- | 1184.5242 | 1188.1855 | 1195.3163 |
| Frequencies -- | 1208.0890 | 1213.8466 | 1214.6958 |
| Frequencies -- | 1215.4577 | 1220.7726 | 1267.1004 |
| Frequencies -- | 1301.5984 | 1320.1791 | 1320.4492 |
| Frequencies -- | 1326.0436 | 1334.5060 | 1339.3224 |
| Frequencies -- | 1342.9055 | 1343.5158 | 1356.7290 |
| Frequencies -- | 1370.3104 | 1413.6681 | 1414.9683 |
| Frequencies -- | 1417.6849 | 1418.6937 | 1419.1650 |
| Frequencies -- | 1424.2154 | 1427.5532 | 1428.2653 |
| Frequencies -- | 1429.8867 | 1432.3801 | 1434.7122 |
| Frequencies -- | 1436.4728 | 1443.0720 | 1448.4562 |
| Frequencies -- | 1451.0058 | 1455.4970 | 1460.5622 |
| Frequencies -- | 1467.8524 | 1469.5790 | 1469.7252 |
| Frequencies -- | 1471.6751 | 1479.4441 | 1481.1640 |
| Frequencies -- | 1482.1017 | 1492.9062 | 1495.2863 |
| Frequencies -- | 1500.5395 | 1501.7048 | 1506.8373 |
| Frequencies -- | 1507.8090 | 1508.7261 | 1513.4555 |
| Frequencies -- | 1517.4625 | 1519.3641 | 1578.6288 |
| Frequencies -- | 1595.7754 | 1595.9303 | 1597.2031 |
| Frequencies -- | 1597.3900 | 1610.6515 | 1620.4181 |
| Frequencies -- | 1620.5025 | 1622.2938 | 1624.0326 |
| Frequencies -- | 2998.0767 | 3008.4622 | 3011.4521 |
| Frequencies -- | 3011.6823 | 3013.1698 | 3014.4886 |
| Frequencies -- | 3015.5467 | 3102.6168 | 3105.2233 |
| Frequencies -- | 3105.9988 | 3107.6469 | 3112.3357 |
| Frequencies -- | 3118.0624 | 3141.5204 | 3144.7004 |
| Frequencies -- | 3145.1539 | 3147.0771 | 3150.4638 |
| Frequencies -- | 3152.9649 | 3154.4211 | 3159.9800 |
| Frequencies -- | 3163.3370 | 3169.2661 | 3175.3468 |
| Frequencies -- | 3181.2692 | 3189.1358 | 3197.6124 |
| Frequencies -- | 3203.0972 | 3203.3195 | 3216.8707 |

**Catalyst 22:**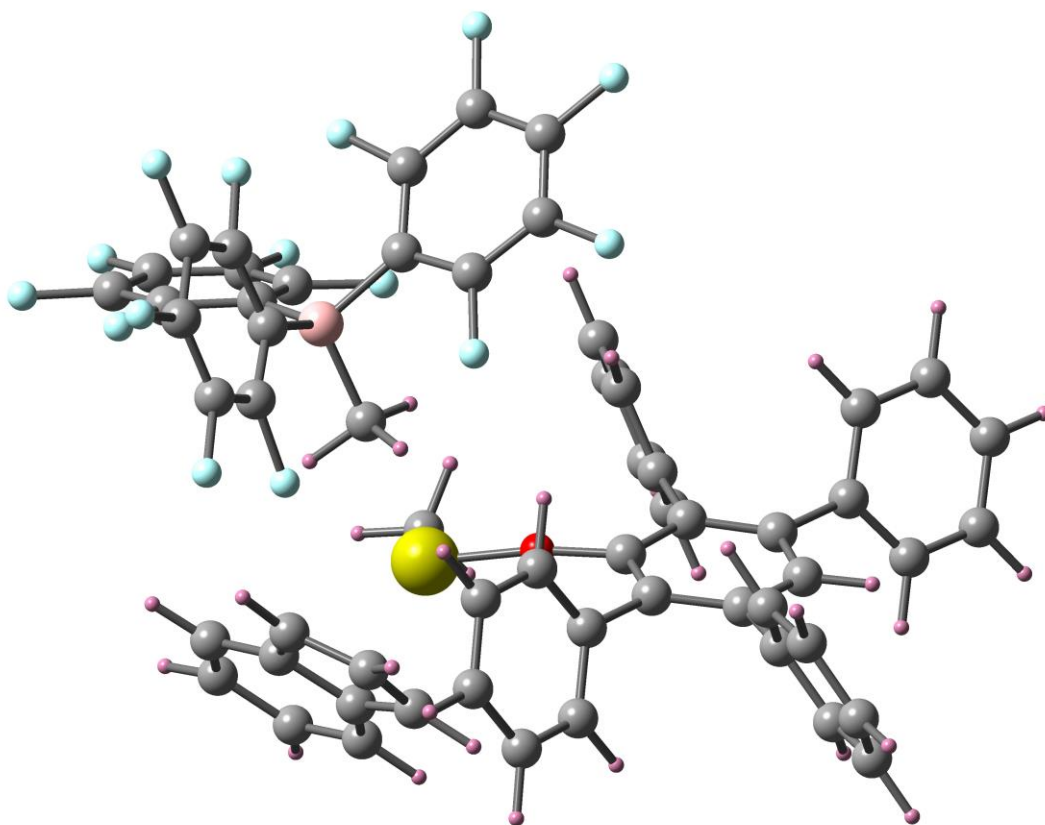

| <b>vacuum</b> | <b>toluene-like solvent</b> | <b>D3 dispersion</b> |
|---------------|-----------------------------|----------------------|
| -3923.278477  | -3923.2957256               | -0.83374868          |

|    |             |             |             |
|----|-------------|-------------|-------------|
| Ti | 0.33506400  | -0.21389100 | 2.16690200  |
| C  | 0.08034700  | -2.23742600 | 2.49899600  |
| H  | -0.03959200 | -2.69132000 | 1.50499900  |
| H  | 0.99336300  | -2.64086200 | 2.96129800  |
| H  | -0.78804600 | -2.45989900 | 3.13349900  |
| O  | 1.77946900  | -0.18510100 | 1.13529300  |
| C  | 3.01078500  | -0.09358100 | 0.48017100  |
| C  | 3.66792500  | 1.17569800  | 0.40090100  |
| C  | 3.58408500  | -1.30365800 | -0.02681200 |
| C  | 4.98477100  | 1.20753700  | -0.15034400 |
| C  | 4.90449000  | -1.24184700 | -0.56375600 |
| C  | 5.57730000  | 0.00089200  | -0.58619000 |
| H  | 6.57226600  | 0.04278100  | -1.02730000 |
| F  | -6.24213400 | -4.10242100 | 1.73407700  |
| C  | -5.45449800 | -3.10612900 | 1.17439700  |
| C  | -5.85141800 | -1.76115200 | 1.23155300  |
| C  | -4.23160800 | -3.42213900 | 0.55808400  |

|   |             |             |             |
|---|-------------|-------------|-------------|
| C | -5.03191600 | -0.76383800 | 0.66030700  |
| F | -7.04319300 | -1.42115200 | 1.86294300  |
| C | -3.45626700 | -2.38917800 | 0.00528600  |
| F | -3.80068900 | -4.74405600 | 0.50931700  |
| C | -3.81145700 | -1.01873600 | -0.00613600 |
| F | -5.50540600 | 0.54633700  | 0.82118900  |
| F | -2.23488700 | -2.79322100 | -0.56543700 |
| B | -2.77754600 | 0.13835600  | -0.61301100 |
| C | -3.47070400 | 1.64994100  | -0.74008900 |
| C | -3.10556800 | 2.81431000  | -0.03415500 |
| C | -4.50479800 | 1.88246200  | -1.68129600 |
| C | -3.67191000 | 4.08921000  | -0.23547700 |
| F | -2.11260100 | 2.77208200  | 0.96682600  |
| C | -5.11272400 | 3.12833000  | -1.91799100 |
| F | -5.00606800 | 0.81117100  | -2.42732100 |
| C | -4.68782800 | 4.25248200  | -1.18884200 |
| F | -3.23070100 | 5.18415600  | 0.50439700  |
| F | -6.12833300 | 3.25894100  | -2.85725300 |
| F | -5.26305400 | 5.49633000  | -1.40502000 |
| C | -2.19102900 | -0.19024600 | -2.14728000 |
| C | -1.08486300 | 0.52356300  | -2.66382300 |
| C | -2.73380300 | -1.10896600 | -3.07915400 |
| C | -0.52439600 | 0.34191000  | -3.94164900 |
| C | -2.21133600 | -1.33211400 | -4.37048000 |
| C | -1.09136900 | -0.60623300 | -4.80799000 |
| F | -3.86674300 | -1.86214900 | -2.76907000 |
| F | -2.79786300 | -2.26314200 | -5.21946500 |
| F | -0.56015500 | -0.81498100 | -6.07277600 |
| F | 0.57722400  | 1.08962400  | -4.35021100 |
| F | -0.47295900 | 1.52892800  | -1.88660300 |
| C | -1.46599600 | 0.06230100  | 0.48908400  |
| H | -0.79768500 | 0.91208000  | 0.29691400  |
| H | -1.94680700 | 0.10762500  | 1.47941200  |
| H | -1.00335200 | -0.90741800 | 0.26526700  |
| C | 3.02250600  | 2.44657500  | 0.88357200  |
| C | 3.55367200  | 3.14718500  | 1.99734100  |
| C | 1.92964500  | 3.02016800  | 0.18394600  |
| C | 3.01475300  | 4.38755700  | 2.39781200  |
| H | 4.40368800  | 2.72969300  | 2.54011300  |
| C | 1.38923500  | 4.26248900  | 0.58118400  |
| H | 1.52064500  | 2.51352700  | -0.68964000 |
| C | 1.93146100  | 4.95282100  | 1.68796600  |
| H | 3.44487800  | 4.91480000  | 3.25233300  |
| H | 0.55424900  | 4.69080900  | 0.02316200  |
| H | 1.51823200  | 5.91770400  | 1.98946300  |
| C | 5.78105600  | 2.47289700  | -0.33541600 |
| C | 7.04378000  | 2.61793600  | 0.29624700  |
| C | 5.34044900  | 3.50603500  | -1.20239600 |
| C | 7.83536600  | 3.76674900  | 0.08362600  |
| H | 7.40444000  | 1.83272400  | 0.96468500  |
| C | 6.13326600  | 4.65130500  | -1.42321500 |
| H | 4.38463200  | 3.40920300  | -1.71843600 |
| C | 7.38248200  | 4.78944900  | -0.77840700 |
| H | 8.80053600  | 3.86070100  | 0.58708300  |
| H | 5.77763900  | 5.43052700  | -2.10135600 |
| H | 7.99494600  | 5.67782000  | -0.94884600 |
| C | 5.62444600  | -2.42989100 | -1.14611500 |

|   |             |             |             |
|---|-------------|-------------|-------------|
| C | 6.86503400  | -2.84656900 | -0.59643200 |
| C | 5.13559200  | -3.10827800 | -2.29222500 |
| C | 7.58759400  | -3.91836600 | -1.16281400 |
| H | 7.26140000  | -2.33687500 | 0.28476400  |
| C | 5.85952500  | -4.17439900 | -2.86513400 |
| H | 4.19545300  | -2.79513000 | -2.74702800 |
| C | 7.08689400  | -4.58740700 | -2.30115200 |
| H | 8.53620400  | -4.22768400 | -0.71747500 |
| H | 5.46661300  | -4.67789300 | -3.75144000 |
| H | 7.64576000  | -5.41498200 | -2.74404700 |
| C | 2.83397600  | -2.60755500 | 0.00293200  |
| C | 3.25732300  | -3.67159300 | 0.83899800  |
| C | 1.73220200  | -2.82667100 | -0.86304400 |
| C | 2.60246800  | -4.92068200 | 0.80730700  |
| H | 4.10906600  | -3.52597500 | 1.50617700  |
| C | 1.07845200  | -4.07621800 | -0.90188700 |
| H | 1.40083000  | -2.02546200 | -1.52693400 |
| C | 1.51286100  | -5.12892900 | -0.06663600 |
| H | 2.94703800  | -5.72947100 | 1.45583400  |
| H | 0.23546300  | -4.22617600 | -1.57903200 |
| H | 1.00757600  | -6.09660100 | -0.09690800 |
| H | -3.06923200 | -0.36142800 | 4.94027600  |
| C | -2.02336600 | -0.61542900 | 5.12245100  |
| C | -0.97604800 | 0.14644200  | 4.52501800  |
| C | -1.67883800 | -1.66826400 | 5.97600200  |
| C | 0.41761700  | -0.19698900 | 4.77391600  |
| C | -0.99114900 | 1.31186200  | 3.66464700  |
| C | -0.30527100 | -1.99326700 | 6.23927600  |
| H | -2.46310900 | -2.25068300 | 6.46399600  |
| C | 0.73926900  | -1.27904400 | 5.64412600  |
| C | 1.24243900  | 0.74641100  | 4.03058000  |
| C | 0.35672700  | 1.72313300  | 3.44345500  |
| H | -1.87285200 | 1.83671900  | 3.31286400  |
| H | -0.07934400 | -2.81164600 | 6.92620500  |
| H | 1.77973800  | -1.53313000 | 5.85480100  |
| H | 2.32280000  | 0.82994900  | 4.09375800  |
| H | 0.66141000  | 2.60543000  | 2.89500700  |

|                |          |          |          |
|----------------|----------|----------|----------|
| Frequencies -- | 1.6199   | 6.7225   | 11.1486  |
| Frequencies -- | 12.7554  | 19.6192  | 21.6580  |
| Frequencies -- | 26.5565  | 29.1485  | 30.1009  |
| Frequencies -- | 31.3228  | 36.6591  | 37.5180  |
| Frequencies -- | 38.6823  | 41.9742  | 44.8875  |
| Frequencies -- | 45.8758  | 46.8521  | 48.6705  |
| Frequencies -- | 58.7755  | 59.7658  | 64.3159  |
| Frequencies -- | 69.7606  | 74.7660  | 77.6777  |
| Frequencies -- | 80.7613  | 91.6251  | 99.2226  |
| Frequencies -- | 101.3816 | 111.1614 | 113.5263 |
| Frequencies -- | 115.0060 | 120.7189 | 124.3467 |
| Frequencies -- | 125.1027 | 136.8783 | 139.5667 |
| Frequencies -- | 141.2479 | 145.2524 | 147.6654 |
| Frequencies -- | 155.4055 | 158.4608 | 160.8573 |
| Frequencies -- | 168.6707 | 171.2454 | 193.3595 |
| Frequencies -- | 208.2397 | 209.8300 | 211.7367 |
| Frequencies -- | 214.1101 | 218.2837 | 222.8644 |
| Frequencies -- | 228.0453 | 233.4539 | 243.6164 |
| Frequencies -- | 245.4698 | 249.6428 | 255.6958 |
| Frequencies -- | 263.9836 | 264.2836 | 264.3885 |
| Frequencies -- | 268.4626 | 270.9073 | 273.8259 |

|                |           |           |           |
|----------------|-----------|-----------|-----------|
| Frequencies -- | 274.7805  | 280.7716  | 287.5099  |
| Frequencies -- | 291.6411  | 296.5466  | 301.5700  |
| Frequencies -- | 309.3267  | 321.6141  | 326.0005  |
| Frequencies -- | 327.3160  | 334.6565  | 336.0782  |
| Frequencies -- | 345.0078  | 347.3800  | 369.4792  |
| Frequencies -- | 375.8371  | 378.1828  | 379.2366  |
| Frequencies -- | 379.8824  | 394.8324  | 400.9821  |
| Frequencies -- | 402.1844  | 405.0074  | 405.3033  |
| Frequencies -- | 406.2400  | 407.2907  | 410.5028  |
| Frequencies -- | 431.6300  | 432.9517  | 434.1454  |
| Frequencies -- | 440.2651  | 442.4925  | 449.4169  |
| Frequencies -- | 457.5322  | 457.8440  | 475.4766  |
| Frequencies -- | 488.2538  | 517.1333  | 527.9688  |
| Frequencies -- | 532.0528  | 539.4026  | 540.6931  |
| Frequencies -- | 543.1171  | 544.1739  | 546.8136  |
| Frequencies -- | 547.9196  | 549.1870  | 566.8721  |
| Frequencies -- | 577.8780  | 587.7863  | 599.6195  |
| Frequencies -- | 600.8801  | 612.2698  | 615.5426  |
| Frequencies -- | 616.8696  | 618.7464  | 623.3755  |
| Frequencies -- | 632.3889  | 633.4013  | 634.8274  |
| Frequencies -- | 638.0779  | 639.6604  | 640.6739  |
| Frequencies -- | 651.1437  | 655.3446  | 667.4047  |
| Frequencies -- | 675.4986  | 689.6331  | 697.2423  |
| Frequencies -- | 701.2332  | 710.0239  | 710.7331  |
| Frequencies -- | 713.2768  | 717.4538  | 717.6554  |
| Frequencies -- | 730.9004  | 737.8944  | 741.4339  |
| Frequencies -- | 743.9143  | 744.6199  | 748.3982  |
| Frequencies -- | 750.7140  | 764.7634  | 765.0511  |
| Frequencies -- | 769.8896  | 770.7686  | 773.3852  |
| Frequencies -- | 783.5763  | 797.9997  | 805.2450  |
| Frequencies -- | 819.9511  | 831.6465  | 840.2823  |
| Frequencies -- | 857.7734  | 858.8370  | 859.3939  |
| Frequencies -- | 860.6835  | 865.2433  | 866.2259  |
| Frequencies -- | 871.3116  | 876.8241  | 880.8386  |
| Frequencies -- | 884.8194  | 895.9265  | 901.8793  |
| Frequencies -- | 913.0350  | 914.7822  | 916.3011  |
| Frequencies -- | 935.0369  | 936.3764  | 939.7525  |
| Frequencies -- | 945.1418  | 967.6456  | 976.7548  |
| Frequencies -- | 985.6818  | 986.4181  | 990.7266  |
| Frequencies -- | 995.1929  | 995.8416  | 1005.2621 |
| Frequencies -- | 1005.8540 | 1007.3230 | 1008.9569 |
| Frequencies -- | 1010.3149 | 1012.3282 | 1013.9489 |
| Frequencies -- | 1016.0070 | 1019.3524 | 1019.8809 |
| Frequencies -- | 1026.9876 | 1028.3193 | 1038.0434 |
| Frequencies -- | 1044.7824 | 1048.2848 | 1050.2219 |
| Frequencies -- | 1052.1018 | 1053.2465 | 1053.4748 |
| Frequencies -- | 1054.8116 | 1059.8044 | 1078.3827 |
| Frequencies -- | 1081.0279 | 1087.5008 | 1089.4803 |
| Frequencies -- | 1090.2329 | 1091.1096 | 1091.6945 |
| Frequencies -- | 1126.2343 | 1128.8840 | 1139.2473 |
| Frequencies -- | 1150.3936 | 1182.1771 | 1183.6412 |
| Frequencies -- | 1183.7463 | 1186.0207 | 1186.3725 |
| Frequencies -- | 1197.9337 | 1205.2437 | 1206.1500 |
| Frequencies -- | 1207.5182 | 1209.3748 | 1210.8409 |
| Frequencies -- | 1213.2230 | 1215.4601 | 1217.6920 |
| Frequencies -- | 1232.6806 | 1242.5776 | 1255.3656 |
| Frequencies -- | 1268.7702 | 1280.8377 | 1305.3125 |
| Frequencies -- | 1318.8259 | 1321.3481 | 1321.3866 |
| Frequencies -- | 1325.4785 | 1328.8945 | 1331.8952 |
| Frequencies -- | 1333.8615 | 1335.9884 | 1339.2444 |
| Frequencies -- | 1345.2797 | 1349.2636 | 1359.9080 |
| Frequencies -- | 1366.7389 | 1367.7234 | 1369.7522 |
| Frequencies -- | 1370.7664 | 1373.8191 | 1378.7038 |

|                |           |           |           |
|----------------|-----------|-----------|-----------|
| Frequencies -- | 1412.7206 | 1419.0040 | 1420.0661 |
| Frequencies -- | 1421.1856 | 1423.1830 | 1428.7908 |
| Frequencies -- | 1432.8247 | 1441.4378 | 1443.1050 |
| Frequencies -- | 1445.7331 | 1447.0800 | 1456.9399 |
| Frequencies -- | 1457.4732 | 1467.6749 | 1467.9154 |
| Frequencies -- | 1468.9129 | 1471.2383 | 1478.6782 |
| Frequencies -- | 1496.4372 | 1496.8789 | 1498.2225 |
| Frequencies -- | 1502.1524 | 1508.9103 | 1526.6331 |
| Frequencies -- | 1562.1937 | 1587.6414 | 1592.6644 |
| Frequencies -- | 1594.6704 | 1594.9922 | 1596.7158 |
| Frequencies -- | 1596.7546 | 1597.9793 | 1598.4152 |
| Frequencies -- | 1618.0266 | 1620.9225 | 1621.2627 |
| Frequencies -- | 1622.7242 | 1622.7823 | 1623.4435 |
| Frequencies -- | 1624.0000 | 1627.4490 | 2984.4333 |
| Frequencies -- | 3018.8113 | 3123.2502 | 3143.6568 |
| Frequencies -- | 3152.4524 | 3152.5574 | 3152.6563 |
| Frequencies -- | 3157.4836 | 3159.0280 | 3159.6023 |
| Frequencies -- | 3160.6482 | 3160.7134 | 3164.0403 |
| Frequencies -- | 3165.2234 | 3170.1899 | 3172.7751 |
| Frequencies -- | 3172.9396 | 3173.0078 | 3174.0305 |
| Frequencies -- | 3181.4324 | 3183.3654 | 3185.3897 |
| Frequencies -- | 3186.0605 | 3186.7203 | 3192.8752 |
| Frequencies -- | 3194.4433 | 3198.0514 | 3198.1270 |
| Frequencies -- | 3198.9248 | 3199.4232 | 3210.6797 |
| Frequencies -- | 3251.0878 | 3262.1440 | 3299.0019 |

**Catalyst 23:**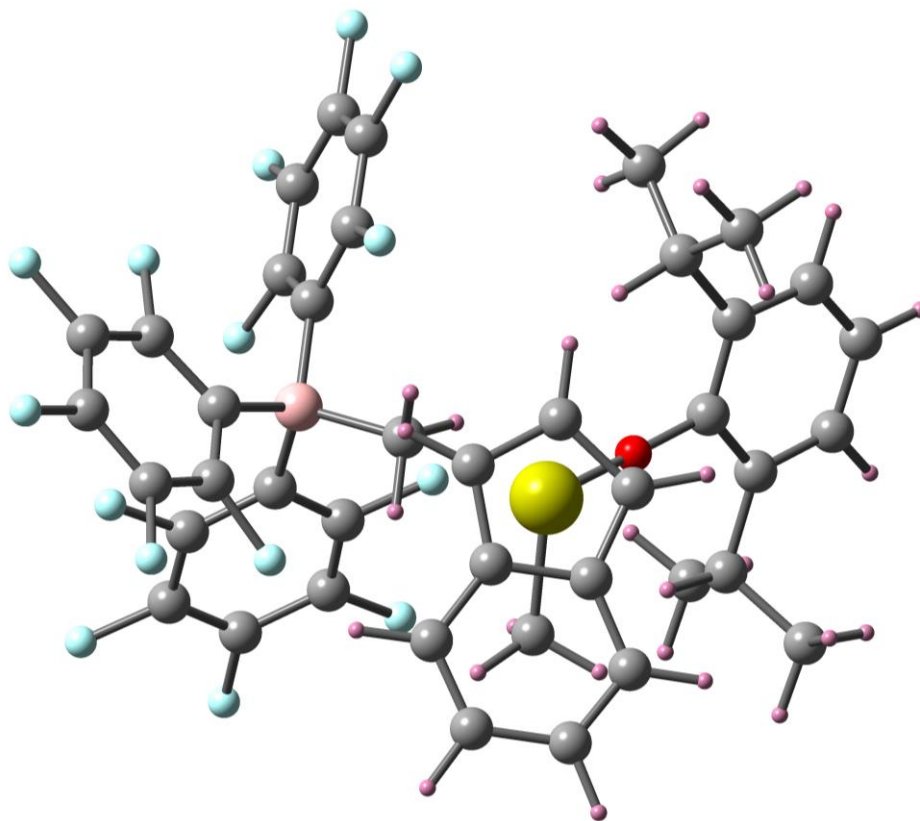

| <b>vacuum</b> | <b>toluene-like solvent</b> | <b>D3 dispersion</b> |
|---------------|-----------------------------|----------------------|
| -3235.2408857 | -3235.2531109               | -0.61667780          |

|    |             |             |             |
|----|-------------|-------------|-------------|
| Ti | 2.02886500  | 1.43154800  | -0.37939100 |
| C  | 2.02951400  | 2.35248700  | 1.48312000  |
| H  | 1.73208500  | 1.55467900  | 2.18486700  |
| H  | 3.03742500  | 2.70915200  | 1.74050900  |
| H  | 1.32021900  | 3.18962500  | 1.53567500  |
| O  | 3.17251200  | 0.10386300  | -0.12254000 |
| C  | 4.15811700  | -0.89399900 | -0.07293900 |
| C  | 4.38543700  | -1.71613200 | -1.22301400 |
| C  | 4.89877300  | -1.05276600 | 1.14241300  |
| C  | 5.41787100  | -2.67968100 | -1.13665300 |
| C  | 5.91114100  | -2.03973100 | 1.16139600  |
| C  | 6.17939100  | -2.83922300 | 0.03538100  |
| H  | 5.62128500  | -3.31912200 | -1.99578400 |
| H  | 6.49288300  | -2.18459900 | 2.07175000  |
| H  | 6.96960600  | -3.59156000 | 0.07453200  |
| F  | -1.57130600 | -5.86407800 | -2.13549400 |
| C  | -1.60961000 | -4.58561200 | -1.59855700 |
| C  | -2.11085800 | -4.36396800 | -0.30628600 |
| C  | -1.15334900 | -3.48467100 | -2.34122600 |

|   |             |             |             |
|---|-------------|-------------|-------------|
| C | -2.14037800 | -3.05489100 | 0.21792900  |
| F | -2.58412400 | -5.43616200 | 0.43988400  |
| C | -1.19298000 | -2.20315200 | -1.76542000 |
| F | -0.67016200 | -3.67173900 | -3.63364500 |
| C | -1.67329100 | -1.90861600 | -0.46792900 |
| F | -2.71110300 | -2.94708100 | 1.49080100  |
| F | -0.75080200 | -1.15970200 | -2.60855300 |
| B | -1.68868000 | -0.35691800 | 0.13592000  |
| C | -1.92539300 | -0.31781600 | 1.78671900  |
| C | -0.93155000 | -0.72711500 | 2.70740100  |
| C | -3.11067300 | 0.12218900  | 2.42257300  |
| C | -1.05461600 | -0.67622100 | 4.10727600  |
| F | 0.28334200  | -1.27551100 | 2.24247000  |
| C | -3.28762800 | 0.19567700  | 3.81964500  |
| F | -4.23118800 | 0.49314500  | 1.67015000  |
| C | -2.24712000 | -0.19976200 | 4.67510500  |
| F | -0.01168200 | -1.09443300 | 4.92954700  |
| F | -4.48532200 | 0.64944200  | 4.35855900  |
| F | -2.39585000 | -0.13001500 | 6.05244100  |
| C | 3.55954800  | -1.60818800 | -2.51287000 |
| H | 2.75135600  | -0.88502600 | -2.34220100 |
| C | 4.62263400  | -0.22193000 | 2.40322100  |
| H | 3.83511700  | 0.49839200  | 2.16722600  |
| C | -2.78532900 | 0.60817900  | -0.67139900 |
| C | -2.73908300 | 2.01954600  | -0.59795400 |
| C | -3.84304500 | 0.14117600  | -1.48789600 |
| C | -3.59260300 | 2.89788800  | -1.28815700 |
| C | -4.73040700 | 0.97529800  | -2.19990200 |
| C | -4.60178400 | 2.37060700  | -2.10943800 |
| F | -4.10114500 | -1.22768800 | -1.61303600 |
| F | -5.73671100 | 0.42921400  | -2.98656000 |
| F | -5.45667200 | 3.21029400  | -2.80764700 |
| F | -3.44363100 | 4.27858200  | -1.16259400 |
| F | -1.80506000 | 2.65280700  | 0.25138600  |
| C | -0.12064400 | 0.30049100  | -0.15162800 |
| H | -0.12247700 | 1.22811900  | 0.44181300  |
| H | 0.57621800  | -0.46129400 | 0.21132900  |
| H | -0.07260100 | 0.46820900  | -1.23465400 |
| C | 2.87425600  | -2.95700600 | -2.87730300 |
| H | 2.19938000  | -2.82109100 | -3.73563500 |
| H | 3.60906100  | -3.72936900 | -3.14888700 |
| H | 2.27953500  | -3.34063800 | -2.03491700 |
| C | 4.41651800  | -1.08262900 | -3.70298900 |
| H | 5.22432800  | -1.78597800 | -3.95540200 |
| H | 3.79036100  | -0.96031200 | -4.60160100 |
| H | 4.88245600  | -0.11204000 | -3.47121300 |
| C | 4.08405500  | -1.11336300 | 3.56210400  |
| H | 4.82469500  | -1.86341800 | 3.87922300  |
| H | 3.84121100  | -0.48990400 | 4.43731000  |
| H | 3.16804900  | -1.64433300 | 3.26244500  |
| C | 5.86964600  | 0.59637600  | 2.84886800  |
| H | 6.23413700  | 1.24420000  | 2.03519000  |
| H | 5.61250300  | 1.23711500  | 3.70758000  |
| H | 6.70220000  | -0.05374300 | 3.15789600  |
| C | 3.54233400  | 4.73518700  | -0.43185800 |
| C | 2.84405800  | 3.75012100  | -1.19182700 |
| C | 2.81492200  | 5.79732000  | 0.11215200  |



|   |             |            |             |
|---|-------------|------------|-------------|
| H | 4.62406800  | 4.67256400 | -0.29984600 |
| C | 1.40336800  | 3.86273700 | -1.38245400 |
| C | 3.29449700  | 2.56952300 | -1.91477000 |
| C | 1.39252300  | 5.89694900 | -0.06113200 |
| H | 3.33344600  | 6.57634300 | 0.67512200  |
| C | 0.67979400  | 4.94076000 | -0.78976700 |
| C | 0.99091700  | 2.77034300 | -2.23832900 |
| C | 2.15671100  | 2.04257200 | -2.62746900 |
| H | 4.32818800  | 2.26812500 | -2.05359000 |
| H | 0.86456900  | 6.74444200 | 0.38079200  |
| H | -0.39926900 | 5.02526800 | -0.92023800 |
| H | -0.01830400 | 2.59073100 | -2.59573200 |
| H | 2.17515500  | 1.21772400 | -3.33241700 |

|                |          |          |          |
|----------------|----------|----------|----------|
| Frequencies -- | -2.6514  | 8.9363   | 12.8143  |
| Frequencies -- | 16.1733  | 20.1556  | 25.1046  |
| Frequencies -- | 28.8115  | 30.9435  | 32.1696  |
| Frequencies -- | 34.1003  | 38.6117  | 39.8297  |
| Frequencies -- | 46.6471  | 48.8089  | 56.2246  |
| Frequencies -- | 63.1332  | 67.6498  | 79.2563  |
| Frequencies -- | 93.3835  | 101.8142 | 105.7701 |
| Frequencies -- | 107.2581 | 115.8803 | 118.2940 |
| Frequencies -- | 120.4155 | 123.2970 | 125.4290 |
| Frequencies -- | 134.9586 | 140.7349 | 148.5051 |
| Frequencies -- | 152.5622 | 153.6351 | 157.9627 |
| Frequencies -- | 158.2543 | 161.1381 | 162.7811 |
| Frequencies -- | 187.1517 | 210.0239 | 212.3936 |
| Frequencies -- | 216.0356 | 218.5791 | 219.7129 |
| Frequencies -- | 232.8547 | 237.3687 | 238.9459 |
| Frequencies -- | 246.5412 | 249.3721 | 258.8898 |
| Frequencies -- | 262.6826 | 264.7979 | 265.3521 |
| Frequencies -- | 265.4626 | 271.4201 | 273.6723 |
| Frequencies -- | 275.7975 | 278.8393 | 283.2488 |
| Frequencies -- | 290.5662 | 292.4482 | 295.4314 |
| Frequencies -- | 308.1531 | 309.4571 | 312.2188 |
| Frequencies -- | 317.0348 | 318.4403 | 330.9882 |
| Frequencies -- | 332.9434 | 338.4495 | 341.4127 |
| Frequencies -- | 351.1280 | 375.7217 | 378.7920 |
| Frequencies -- | 379.2118 | 381.0551 | 387.6398 |
| Frequencies -- | 390.7624 | 393.6630 | 423.6460 |
| Frequencies -- | 427.5915 | 431.7333 | 432.3098 |
| Frequencies -- | 433.0062 | 434.4463 | 442.3934 |
| Frequencies -- | 454.7722 | 456.5225 | 457.2799 |
| Frequencies -- | 474.5070 | 519.6930 | 535.8162 |
| Frequencies -- | 538.2237 | 541.1545 | 541.7470 |
| Frequencies -- | 544.1553 | 545.5096 | 547.8316 |
| Frequencies -- | 564.1814 | 584.6427 | 593.0483 |
| Frequencies -- | 596.2094 | 599.0093 | 599.2910 |
| Frequencies -- | 609.2990 | 629.9303 | 630.4308 |
| Frequencies -- | 639.1458 | 640.2519 | 643.4179 |
| Frequencies -- | 659.5814 | 662.9290 | 673.3246 |
| Frequencies -- | 692.9191 | 726.9963 | 728.2749 |
| Frequencies -- | 728.8158 | 736.9385 | 741.0023 |
| Frequencies -- | 742.2381 | 758.6797 | 760.3055 |
| Frequencies -- | 763.5269 | 770.5184 | 772.1127 |
| Frequencies -- | 796.1250 | 805.1408 | 817.6444 |
| Frequencies -- | 819.9929 | 836.5190 | 856.4933 |
| Frequencies -- | 863.5265 | 870.4098 | 877.1313 |
| Frequencies -- | 878.5658 | 883.5056 | 886.7994 |
| Frequencies -- | 906.6735 | 908.6776 | 910.8004 |
| Frequencies -- | 924.6332 | 930.5550 | 933.0677 |

|                |           |           |           |
|----------------|-----------|-----------|-----------|
| Frequencies -- | 937.8003  | 939.7243  | 961.5118  |
| Frequencies -- | 963.2814  | 980.2909  | 993.1709  |
| Frequencies -- | 1009.6386 | 1010.5656 | 1012.9830 |
| Frequencies -- | 1024.0301 | 1025.9319 | 1046.6906 |
| Frequencies -- | 1048.8339 | 1050.7764 | 1055.6386 |
| Frequencies -- | 1058.9173 | 1068.3478 | 1072.9525 |
| Frequencies -- | 1073.3434 | 1096.6032 | 1113.6576 |
| Frequencies -- | 1116.1352 | 1117.3802 | 1120.1887 |
| Frequencies -- | 1140.4151 | 1166.8218 | 1178.7415 |
| Frequencies -- | 1183.5445 | 1185.0105 | 1187.8317 |
| Frequencies -- | 1204.2002 | 1208.1419 | 1214.4465 |
| Frequencies -- | 1215.1933 | 1216.3614 | 1244.1758 |
| Frequencies -- | 1252.5392 | 1269.6572 | 1275.3867 |
| Frequencies -- | 1310.0291 | 1319.7449 | 1320.8927 |
| Frequencies -- | 1325.0028 | 1325.8989 | 1328.7500 |
| Frequencies -- | 1336.0199 | 1338.5697 | 1342.1126 |
| Frequencies -- | 1343.3415 | 1362.2967 | 1372.8990 |
| Frequencies -- | 1384.2809 | 1399.7201 | 1400.3203 |
| Frequencies -- | 1415.8943 | 1416.9783 | 1417.7793 |
| Frequencies -- | 1418.8686 | 1418.9066 | 1421.8032 |
| Frequencies -- | 1423.0536 | 1430.2961 | 1436.5575 |
| Frequencies -- | 1439.1927 | 1460.6074 | 1467.2909 |
| Frequencies -- | 1468.8974 | 1469.7417 | 1470.0356 |
| Frequencies -- | 1471.9619 | 1473.9501 | 1486.3990 |
| Frequencies -- | 1487.4917 | 1488.6297 | 1492.1917 |
| Frequencies -- | 1498.8712 | 1499.6758 | 1503.6418 |
| Frequencies -- | 1506.3155 | 1508.9424 | 1561.4057 |
| Frequencies -- | 1594.9463 | 1595.3712 | 1596.7505 |
| Frequencies -- | 1597.1646 | 1604.4875 | 1620.2245 |
| Frequencies -- | 1620.9535 | 1622.6607 | 1627.6925 |
| Frequencies -- | 2993.4505 | 3001.6408 | 3006.9502 |
| Frequencies -- | 3007.6230 | 3013.1897 | 3019.3098 |
| Frequencies -- | 3077.4470 | 3105.9064 | 3108.9474 |
| Frequencies -- | 3112.2040 | 3113.8365 | 3116.4179 |
| Frequencies -- | 3124.5015 | 3124.8159 | 3128.4318 |
| Frequencies -- | 3129.9197 | 3136.3947 | 3151.6157 |
| Frequencies -- | 3161.2757 | 3166.8491 | 3167.1825 |
| Frequencies -- | 3178.1658 | 3178.2605 | 3188.8120 |
| Frequencies -- | 3192.9525 | 3201.3255 | 3207.2748 |
| Frequencies -- | 3243.5401 | 3249.4949 | 3271.4472 |

**Catalyst 24:**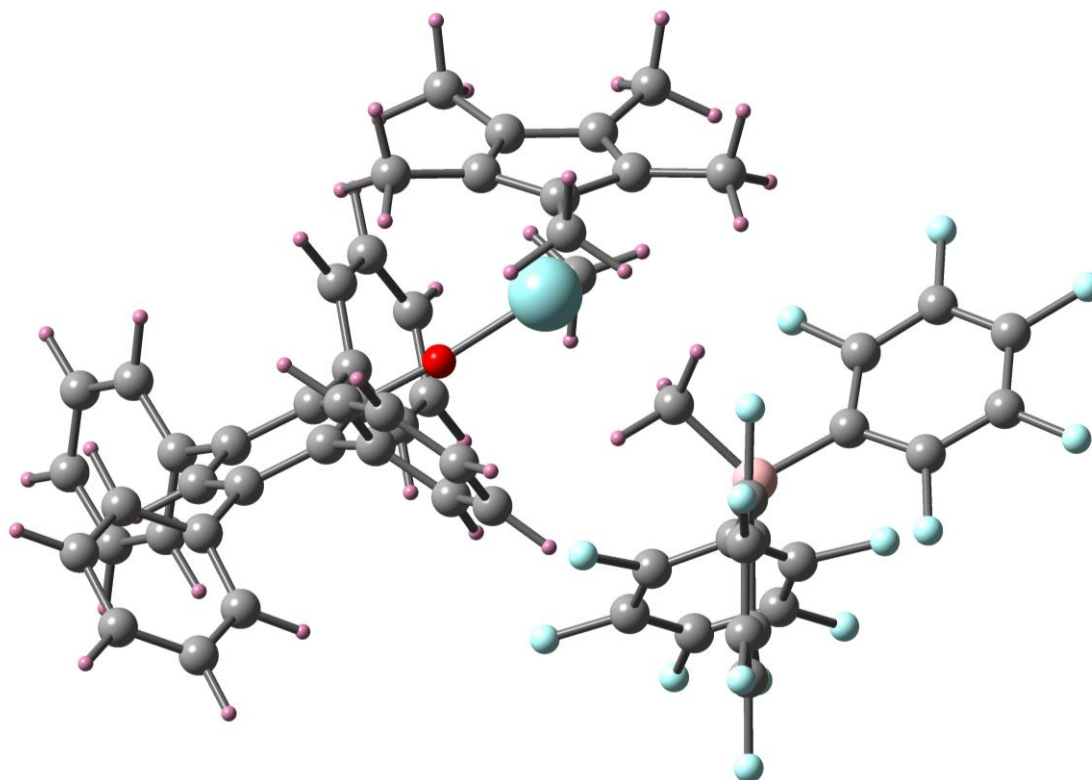

| vacuum       | toluene-like solvent | bromobenzene-like solvent | 1,2-dichlorobenzene-like solvent | D3 dispersion |
|--------------|----------------------|---------------------------|----------------------------------|---------------|
| -3954.663659 | -3954.675539*        | -3954.6874613             | -3954.6918592                    | -0.8671433    |

\* estimated LANL2DZ energy using the solvation energy calculated with 6-311++G\*\* basis sets (because the PCM calculation did not converge with LANL2DZ basis sets)

|   |             |             |             |
|---|-------------|-------------|-------------|
| C | -0.14710600 | -3.05753100 | -1.13779600 |
| H | -0.28049300 | -3.00003600 | -0.04209300 |
| H | -0.93635700 | -3.71535700 | -1.52835400 |
| H | 0.83147100  | -3.51139500 | -1.35516100 |
| O | -1.94130300 | -0.40473600 | -0.93578200 |
| C | -3.16003100 | 0.00765300  | -0.38685300 |
| C | -3.48336400 | 1.40208800  | -0.36397800 |
| C | -4.03822900 | -0.98901800 | 0.14466000  |
| C | -4.74363100 | 1.79467800  | 0.18268300  |
| C | -5.29468000 | -0.57120300 | 0.67513000  |
| C | -5.62132400 | 0.80186700  | 0.67077500  |
| H | -6.57596800 | 1.11135700  | 1.09414500  |
| C | 0.17103100  | 0.15203900  | -4.08825000 |
| C | 1.15167100  | -0.91546800 | -4.01779700 |
| C | -1.14335800 | -0.45383800 | -4.17893500 |
| C | 0.44817400  | -2.17613300 | -4.06442200 |
| C | -0.96914600 | -1.89337000 | -4.14973800 |
| F | 7.99398100  | -2.23903700 | -1.54085400 |
| C | 6.84069700  | -1.70248800 | -0.98708700 |
| C | 6.87926100  | -0.48955800 | -0.28062600 |

|   |             |             |             |
|---|-------------|-------------|-------------|
| C | 5.60985200  | -2.36489100 | -1.11441200 |
| C | 5.69259100  | 0.03967600  | 0.26592100  |
| F | 8.09017000  | 0.17328200  | -0.12042100 |
| C | 4.45750900  | -1.79046400 | -0.54788000 |
| F | 5.53738100  | -3.57582000 | -1.80008700 |
| C | 4.41595500  | -0.56127300 | 0.14724800  |
| F | 5.86092300  | 1.22083600  | 0.99683500  |
| F | 3.28311600  | -2.55894500 | -0.69576300 |
| B | 3.00129400  | 0.08615900  | 0.75677500  |
| C | 3.15460300  | 1.73378900  | 0.94750800  |
| C | 3.28313100  | 2.59431600  | -0.16682000 |
| C | 3.20211700  | 2.41983400  | 2.18351700  |
| C | 3.42902300  | 3.99068000  | -0.09665100 |
| F | 3.30000500  | 2.05748400  | -1.47156800 |
| C | 3.33962200  | 3.81756300  | 2.31170300  |
| F | 3.14789100  | 1.72110500  | 3.39419600  |
| C | 3.45369800  | 4.61463800  | 1.16127100  |
| F | 3.53702800  | 4.75715800  | -1.25471600 |
| F | 3.37349900  | 4.41462600  | 3.56635100  |
| F | 3.58492500  | 5.99264900  | 1.26347100  |
| C | 2.52600400  | -0.68707700 | 2.16052700  |
| C | 1.20581900  | -0.59017500 | 2.66041300  |
| C | 3.34828900  | -1.52306400 | 2.95255600  |
| C | 0.71376000  | -1.26876200 | 3.78885600  |
| C | 2.90881900  | -2.22453800 | 4.09507500  |
| C | 1.57503200  | -2.10577900 | 4.51621300  |
| F | 4.70437800  | -1.68907300 | 2.65108600  |
| F | 3.78512700  | -3.03225100 | 4.80989800  |
| F | 1.11687300  | -2.79560700 | 5.62970600  |
| F | -0.61489600 | -1.12484600 | 4.18463700  |
| F | 0.27292100  | 0.26138200  | 2.03105700  |
| C | 1.74787600  | -0.17573500 | -0.38662000 |
| H | 0.96224000  | 0.55663000  | -0.15220800 |
| H | 2.17736600  | -0.02731900 | -1.38403900 |
| H | 1.44375800  | -1.21783300 | -0.19852700 |
| C | -2.54048600 | 2.45682500  | -0.87861800 |
| C | -2.88718200 | 3.25336300  | -2.00062300 |
| C | -1.34431100 | 2.76646400  | -0.18167600 |
| C | -2.07401200 | 4.33137400  | -2.40897600 |
| H | -3.81390900 | 3.04622700  | -2.53855700 |
| C | -0.53316300 | 3.84944600  | -0.58290200 |
| H | -1.07520400 | 2.19291600  | 0.70634800  |
| C | -0.89340600 | 4.63770400  | -1.69734100 |
| H | -2.37206400 | 4.94069000  | -3.26558000 |
| H | 0.36323800  | 4.09257400  | -0.01188500 |
| H | -0.26894500 | 5.48186900  | -1.99782800 |
| C | -5.19659600 | 3.22691100  | 0.30753300  |
| C | -6.38633400 | 3.65271400  | -0.33917900 |
| C | -4.51189200 | 4.15703400  | 1.13203400  |
| C | -6.86744200 | 4.97045400  | -0.18457200 |
| H | -6.93397900 | 2.95123000  | -0.97268600 |
| C | -4.99485800 | 5.47218100  | 1.29513700  |
| H | -3.60736400 | 3.85028200  | 1.65833200  |
| C | -6.17221700 | 5.88719000  | 0.63409200  |
| H | -7.78149900 | 5.27743400  | -0.69863100 |
| H | -4.45484100 | 6.16876700  | 1.94079600  |
| H | -6.54423100 | 6.90667300  | 0.75969200  |

|                |             |             |             |
|----------------|-------------|-------------|-------------|
| C              | -6.29496600 | -1.51520100 | 1.29501600  |
| C              | -7.07215100 | -2.40634500 | 0.51237100  |
| C              | -6.53300500 | -1.46652700 | 2.69322400  |
| C              | -8.05156000 | -3.22885300 | 1.10841200  |
| H              | -6.92214500 | -2.44839600 | -0.56772200 |
| C              | -7.50600800 | -2.29362300 | 3.29360300  |
| H              | -5.94788100 | -0.78490900 | 3.31438400  |
| C              | -8.27038800 | -3.17913900 | 2.50270900  |
| H              | -8.64281500 | -3.90413400 | 0.48516400  |
| H              | -7.66541100 | -2.24534800 | 4.37343300  |
| H              | -9.02630700 | -3.81815200 | 2.96510400  |
| C              | -3.64153000 | -2.43989500 | 0.25194800  |
| C              | -3.95697300 | -3.38052700 | -0.75836500 |
| C              | -3.02502400 | -2.90912200 | 1.44078400  |
| C              | -3.68637400 | -4.75469500 | -0.58253800 |
| H              | -4.44086600 | -3.04136300 | -1.67717200 |
| C              | -2.75105200 | -4.28153300 | 1.62017200  |
| H              | -2.77788000 | -2.20266300 | 2.23621700  |
| C              | -3.08604600 | -5.21108400 | 0.61105500  |
| H              | -3.95667400 | -5.46623000 | -1.36690400 |
| H              | -2.28798000 | -4.62298300 | 2.54892600  |
| H              | -2.88552500 | -6.27517100 | 0.75508700  |
| C              | 1.09229900  | -3.53642600 | -4.20439600 |
| H              | 1.28099000  | -3.74848100 | -5.27151400 |
| H              | 2.05841700  | -3.59810100 | -3.68608300 |
| H              | 0.45454300  | -4.34218100 | -3.82019600 |
| C              | 2.65486000  | -0.74893900 | -4.11473800 |
| H              | 3.20068000  | -1.54168900 | -3.58712900 |
| H              | 2.96072700  | -0.79895900 | -5.17421900 |
| H              | 3.00111400  | 0.21759800  | -3.72769200 |
| C              | 0.48315500  | 1.62795100  | -4.22503700 |
| H              | 1.41483000  | 1.91221700  | -3.71849100 |
| H              | 0.60729100  | 1.87902400  | -5.29324200 |
| H              | -0.31669600 | 2.26497100  | -3.83171000 |
| C              | -2.44190300 | 0.26550000  | -4.48253600 |
| H              | -3.30622700 | -0.18141500 | -3.97125000 |
| H              | -2.40068500 | 1.32377400  | -4.20517600 |
| H              | -2.64302600 | 0.21551400  | -5.56700000 |
| C              | -2.06335200 | -2.91336100 | -4.38251000 |
| H              | -3.04203900 | -2.55881500 | -4.03348800 |
| H              | -2.15705500 | -3.11514200 | -5.46415000 |
| H              | -1.85575900 | -3.87167800 | -3.88967600 |
| Zr             | -0.31208100 | -0.96252900 | -1.85882400 |
| Frequencies -- | 6.0550      | 9.0843      | 12.3342     |
| Frequencies -- | 15.0120     | 17.1668     | 21.7968     |
| Frequencies -- | 23.9552     | 25.0681     | 27.2945     |
| Frequencies -- | 27.6315     | 30.3400     | 32.4174     |
| Frequencies -- | 38.3976     | 40.4702     | 42.9423     |
| Frequencies -- | 45.7983     | 46.4200     | 48.6294     |
| Frequencies -- | 53.8575     | 54.7626     | 63.4076     |
| Frequencies -- | 65.0195     | 74.3805     | 78.1988     |
| Frequencies -- | 80.2236     | 85.0431     | 85.2473     |
| Frequencies -- | 103.0778    | 105.0419    | 106.4830    |
| Frequencies -- | 116.8348    | 117.7248    | 118.0650    |
| Frequencies -- | 118.6344    | 123.7461    | 125.4969    |
| Frequencies -- | 127.3265    | 129.6259    | 130.6123    |
| Frequencies -- | 138.5315    | 139.8743    | 144.8962    |

|                |           |           |           |
|----------------|-----------|-----------|-----------|
| Frequencies -- | 150.4483  | 150.9497  | 152.5946  |
| Frequencies -- | 157.4374  | 158.2719  | 160.6130  |
| Frequencies -- | 161.3523  | 162.8413  | 176.1445  |
| Frequencies -- | 180.8001  | 189.0681  | 193.4809  |
| Frequencies -- | 209.5809  | 210.8323  | 213.6552  |
| Frequencies -- | 214.3694  | 219.0431  | 220.5930  |
| Frequencies -- | 230.2540  | 234.2568  | 248.1835  |
| Frequencies -- | 255.3031  | 256.3852  | 264.3590  |
| Frequencies -- | 264.8621  | 265.0784  | 267.9741  |
| Frequencies -- | 270.0408  | 272.5515  | 285.6035  |
| Frequencies -- | 287.1336  | 288.8014  | 289.6167  |
| Frequencies -- | 290.3868  | 296.4464  | 301.3556  |
| Frequencies -- | 310.9399  | 315.7587  | 316.1962  |
| Frequencies -- | 317.1903  | 330.0398  | 332.0145  |
| Frequencies -- | 333.2027  | 335.2864  | 344.2157  |
| Frequencies -- | 350.7469  | 378.8767  | 380.2335  |
| Frequencies -- | 382.1424  | 386.4911  | 387.1686  |
| Frequencies -- | 391.2255  | 397.1081  | 402.8369  |
| Frequencies -- | 403.0445  | 406.7636  | 408.5697  |
| Frequencies -- | 411.0783  | 414.9480  | 432.2013  |
| Frequencies -- | 432.5984  | 433.0785  | 433.9196  |
| Frequencies -- | 450.6013  | 456.6612  | 457.8628  |
| Frequencies -- | 472.3366  | 490.4286  | 497.2053  |
| Frequencies -- | 512.4444  | 528.5256  | 538.5005  |
| Frequencies -- | 540.1618  | 541.9869  | 542.6516  |
| Frequencies -- | 543.7397  | 548.4911  | 548.7196  |
| Frequencies -- | 555.2681  | 565.6897  | 582.4471  |
| Frequencies -- | 592.2703  | 592.7277  | 595.0702  |
| Frequencies -- | 604.1634  | 614.5644  | 617.3847  |
| Frequencies -- | 617.8891  | 620.8471  | 625.0354  |
| Frequencies -- | 629.9946  | 635.2818  | 636.1862  |
| Frequencies -- | 639.6958  | 640.4931  | 642.8800  |
| Frequencies -- | 654.9171  | 660.6714  | 661.2678  |
| Frequencies -- | 665.5525  | 688.3124  | 696.5378  |
| Frequencies -- | 699.8469  | 709.6186  | 711.2710  |
| Frequencies -- | 712.3546  | 717.2307  | 722.3554  |
| Frequencies -- | 726.6730  | 728.0479  | 743.1520  |
| Frequencies -- | 744.5642  | 759.4302  | 760.9737  |
| Frequencies -- | 770.6070  | 773.1025  | 775.8758  |
| Frequencies -- | 778.0712  | 795.9215  | 801.3959  |
| Frequencies -- | 802.3319  | 807.6591  | 847.6064  |
| Frequencies -- | 854.9137  | 857.6921  | 859.1082  |
| Frequencies -- | 861.9712  | 868.8618  | 870.8252  |
| Frequencies -- | 874.6731  | 907.9623  | 908.8884  |
| Frequencies -- | 909.6536  | 910.8948  | 930.2826  |
| Frequencies -- | 937.6264  | 940.8081  | 948.1078  |
| Frequencies -- | 956.0587  | 969.4722  | 974.2506  |
| Frequencies -- | 983.9208  | 987.8552  | 992.1563  |
| Frequencies -- | 996.6968  | 998.6360  | 1004.4184 |
| Frequencies -- | 1005.6838 | 1007.6514 | 1011.0482 |
| Frequencies -- | 1012.2600 | 1015.2631 | 1021.1659 |
| Frequencies -- | 1024.2146 | 1025.5416 | 1026.7761 |
| Frequencies -- | 1040.5717 | 1043.0939 | 1044.7322 |
| Frequencies -- | 1046.4955 | 1047.3052 | 1048.4896 |
| Frequencies -- | 1049.6672 | 1050.0978 | 1050.7592 |
| Frequencies -- | 1052.0304 | 1052.3097 | 1055.7890 |
| Frequencies -- | 1056.7855 | 1074.9487 | 1087.0323 |
| Frequencies -- | 1088.4270 | 1088.5407 | 1089.5542 |
| Frequencies -- | 1090.7906 | 1091.1440 | 1104.6385 |
| Frequencies -- | 1126.1351 | 1127.4517 | 1130.6980 |
| Frequencies -- | 1160.6322 | 1171.5855 | 1175.3321 |
| Frequencies -- | 1182.5741 | 1182.7628 | 1182.9835 |
| Frequencies -- | 1184.3284 | 1202.9159 | 1204.7576 |

|                |           |           |           |
|----------------|-----------|-----------|-----------|
| Frequencies -- | 1205.1974 | 1206.5319 | 1206.8220 |
| Frequencies -- | 1213.5682 | 1215.0651 | 1215.8800 |
| Frequencies -- | 1230.9262 | 1267.5582 | 1279.6579 |
| Frequencies -- | 1305.6464 | 1319.5059 | 1323.5836 |
| Frequencies -- | 1324.6529 | 1327.9295 | 1327.9503 |
| Frequencies -- | 1329.1967 | 1330.4864 | 1333.8915 |
| Frequencies -- | 1339.4258 | 1341.6493 | 1344.5676 |
| Frequencies -- | 1366.1120 | 1367.8315 | 1369.2429 |
| Frequencies -- | 1370.5273 | 1381.5944 | 1414.3990 |
| Frequencies -- | 1417.2527 | 1418.7896 | 1419.4337 |
| Frequencies -- | 1420.2226 | 1425.4393 | 1427.4599 |
| Frequencies -- | 1428.5464 | 1428.9542 | 1435.7043 |
| Frequencies -- | 1438.8381 | 1440.5257 | 1441.4472 |
| Frequencies -- | 1443.3481 | 1443.6295 | 1447.1726 |
| Frequencies -- | 1448.8318 | 1454.9599 | 1455.2101 |
| Frequencies -- | 1459.1308 | 1468.2966 | 1469.4786 |
| Frequencies -- | 1471.5078 | 1482.0001 | 1485.2493 |
| Frequencies -- | 1486.9456 | 1493.8650 | 1495.6015 |
| Frequencies -- | 1496.2190 | 1496.9191 | 1501.3701 |
| Frequencies -- | 1502.2644 | 1503.1547 | 1507.9754 |
| Frequencies -- | 1508.8402 | 1509.3086 | 1512.2854 |
| Frequencies -- | 1515.2135 | 1519.6723 | 1529.2312 |
| Frequencies -- | 1591.9732 | 1594.0885 | 1595.7333 |
| Frequencies -- | 1595.8899 | 1596.9028 | 1597.0877 |
| Frequencies -- | 1597.5971 | 1601.1412 | 1619.9289 |
| Frequencies -- | 1620.3330 | 1622.0485 | 1623.4613 |
| Frequencies -- | 1623.6855 | 1624.2957 | 1624.7796 |
| Frequencies -- | 2984.9988 | 2996.6259 | 3010.8668 |
| Frequencies -- | 3011.0835 | 3011.9239 | 3012.7233 |
| Frequencies -- | 3016.5417 | 3100.4103 | 3104.7324 |
| Frequencies -- | 3107.2002 | 3109.4462 | 3110.8721 |
| Frequencies -- | 3112.4419 | 3120.6403 | 3141.3746 |
| Frequencies -- | 3147.0345 | 3148.4750 | 3151.9135 |
| Frequencies -- | 3152.5421 | 3153.0063 | 3155.7299 |
| Frequencies -- | 3156.4622 | 3158.0404 | 3159.3562 |
| Frequencies -- | 3159.7870 | 3160.5768 | 3162.3881 |
| Frequencies -- | 3166.4345 | 3169.1711 | 3172.2983 |
| Frequencies -- | 3172.6577 | 3172.6907 | 3176.9922 |
| Frequencies -- | 3181.4109 | 3184.2269 | 3185.2540 |
| Frequencies -- | 3186.8365 | 3191.6190 | 3192.4022 |
| Frequencies -- | 3193.3664 | 3197.3256 | 3209.9971 |

**Catalyst 30:**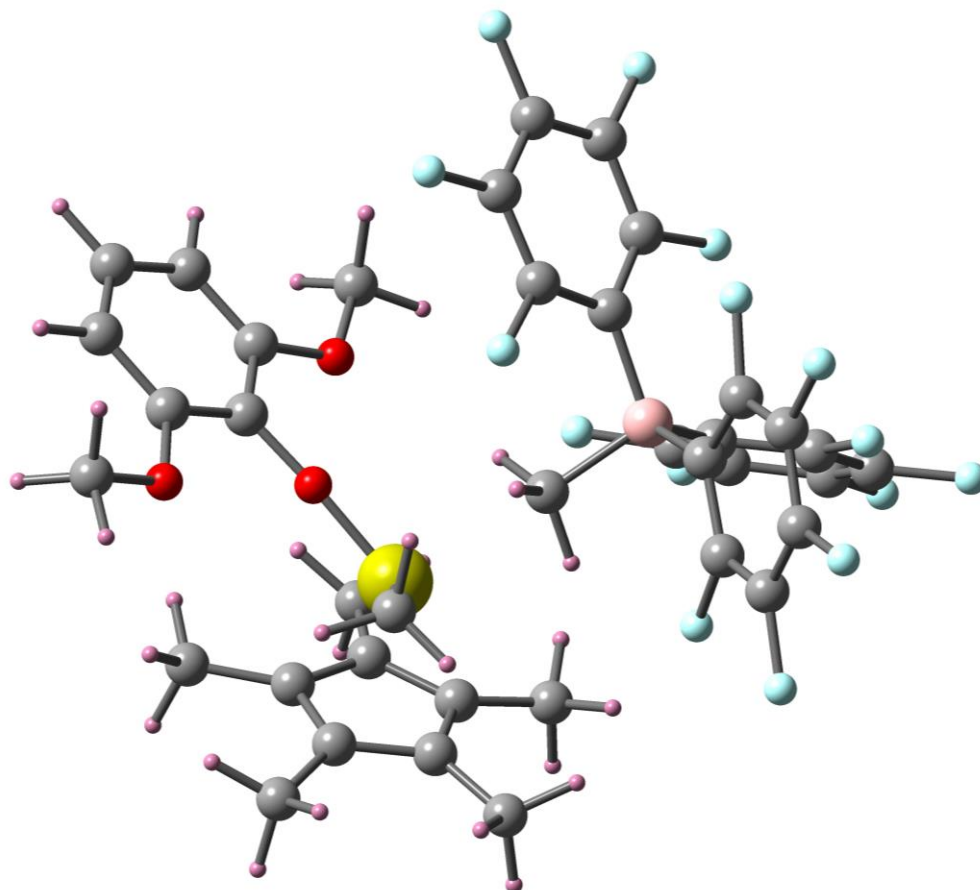

| vacuum        | toluene-like solvent | D3 dispersion |
|---------------|----------------------|---------------|
| -3271.3511915 | -3271.3620576        | -0.58924176   |

|    |             |             |             |
|----|-------------|-------------|-------------|
| Ti | -2.11248200 | -1.56249600 | 0.11484300  |
| C  | -2.17204400 | -1.96903000 | 2.16298200  |
| H  | -1.84723900 | -1.02069800 | 2.62724600  |
| H  | -3.20009000 | -2.17025900 | 2.49481300  |
| H  | -1.50856000 | -2.79091600 | 2.47152400  |
| O  | -3.11057300 | -0.09599400 | 0.11569200  |
| C  | -3.94095700 | 0.98619700  | -0.01194800 |
| C  | -3.69844800 | 1.94989200  | -1.03810600 |
| C  | -5.02031900 | 1.17600900  | 0.90196200  |
| C  | -4.52553500 | 3.09250600  | -1.14037700 |
| C  | -5.84005100 | 2.32353300  | 0.78861300  |
| C  | -5.58275800 | 3.26627900  | -0.22594900 |
| H  | -4.34920200 | 3.84175200  | -1.90886900 |
| H  | -6.66423000 | 2.49113400  | 1.47837800  |
| H  | -6.21486600 | 4.15277600  | -0.30349400 |
| C  | -2.59104000 | -2.57711900 | -1.97071200 |
| C  | -1.43309500 | -3.31069600 | -1.49827800 |
| C  | -3.68569700 | -2.84164800 | -1.06160300 |



|   |             |             |             |
|---|-------------|-------------|-------------|
| C | -1.80882400 | -4.02233900 | -0.30011200 |
| C | -3.19843300 | -3.73853100 | -0.02835300 |
| F | 0.08699900  | 6.03104900  | 0.55625900  |
| C | 0.47487100  | 4.70021000  | 0.46804600  |
| C | 1.44542900  | 4.29646300  | -0.46146600 |
| C | -0.09269200 | 3.73132500  | 1.31179900  |
| C | 1.81994800  | 2.93828800  | -0.53856700 |
| F | 2.03276300  | 5.24212300  | -1.29650700 |
| C | 0.31324700  | 2.39138700  | 1.18836400  |
| F | -1.04250000 | 4.10680500  | 2.25744900  |
| C | 1.26585400  | 1.90953700  | 0.25794900  |
| F | 2.82595800  | 2.66493200  | -1.47448400 |
| F | -0.27381800 | 1.50694100  | 2.11355100  |
| B | 1.63067600  | 0.28437800  | 0.14323100  |
| C | 2.53843700  | -0.06436000 | -1.21288400 |
| C | 2.37436100  | -0.29323000 | 1.52254700  |
| C | 0.12715600  | -0.53142100 | 0.02446300  |
| C | 3.92399100  | -0.35513600 | -1.20194400 |
| C | 1.98897700  | -0.09077900 | -2.51479400 |
| C | 2.96530800  | 0.50437000  | 2.53068800  |
| C | 2.47221500  | -1.67747400 | 1.79408100  |
| H | -0.46764300 | 0.01451300  | -0.72193100 |
| H | 0.36280900  | -1.55926500 | -0.26875200 |
| H | -0.28528600 | -0.45272600 | 1.03931700  |
| C | 4.68143100  | -0.68343600 | -2.34544500 |
| F | 4.65926900  | -0.29480400 | -0.01300100 |
| C | 2.69538500  | -0.40923900 | -3.68791500 |
| F | 0.63674500  | 0.26084700  | -2.72097100 |
| C | 3.54805800  | -0.00373200 | 3.70981600  |
| F | 3.03947900  | 1.89488100  | 2.39139200  |
| C | 3.04373300  | -2.23941700 | 2.94945300  |
| F | 2.01250000  | -2.61829400 | 0.84506500  |
| C | 4.06199000  | -0.71958100 | -3.60456200 |
| F | 6.03874400  | -0.96337400 | -2.23977300 |
| F | 2.05354100  | -0.41701700 | -4.92544200 |
| C | 3.58300300  | -1.39016600 | 3.92884000  |
| F | 4.09853800  | 0.85401400  | 4.65508300  |
| F | 3.08300900  | -3.62040300 | 3.12698100  |
| F | 4.78466200  | -1.04494500 | -4.74368800 |
| F | 4.14767900  | -1.91201600 | 5.08410600  |
| C | -4.05526600 | -4.41911400 | 1.01247800  |
| H | -4.92244900 | -3.80983700 | 1.30009500  |
| H | -4.44402700 | -5.36911800 | 0.60562700  |
| H | -3.49661800 | -4.66120900 | 1.92530400  |
| C | -5.12348600 | -2.41198900 | -1.24381500 |
| H | -5.68938400 | -3.20687100 | -1.76002300 |
| H | -5.62455100 | -2.21843500 | -0.28579800 |
| H | -5.20971800 | -1.50204100 | -1.85100000 |
| C | -0.92441400 | -4.97900500 | 0.46568100  |
| H | -1.28497900 | -5.15014200 | 1.48785600  |
| H | -0.90536100 | -5.96027600 | -0.04039700 |
| H | 0.11509500  | -4.63041600 | 0.53033500  |
| C | -0.12580400 | -3.47296100 | -2.24111600 |
| H | 0.72597600  | -3.63970900 | -1.56908500 |
| H | -0.19305800 | -4.35582400 | -2.90066400 |
| H | 0.10516400  | -2.61234400 | -2.87919900 |
| C | -2.67301600 | -1.79264300 | -3.26049600 |

|   |             |             |             |
|---|-------------|-------------|-------------|
| H | -2.96777400 | -2.46364200 | -4.08646000 |
| H | -3.41426400 | -0.98549200 | -3.20907400 |
| H | -1.71211300 | -1.33908200 | -3.53547900 |
| O | -2.61628400 | 1.65888700  | -1.87031800 |
| O | -5.17887000 | 0.16728900  | 1.85595600  |
| C | -2.22570700 | 2.63265100  | -2.90154900 |
| H | -1.97684200 | 3.60777600  | -2.45296700 |
| H | -1.33381100 | 2.19942600  | -3.36746700 |
| H | -3.02290300 | 2.75615500  | -3.65295000 |
| C | -6.17613300 | 0.35831800  | 2.91703700  |
| H | -5.97407600 | 1.27591800  | 3.49275800  |
| H | -7.19929600 | 0.38770500  | 2.50649400  |
| H | -6.06379200 | -0.51745100 | 3.56750300  |

|                |          |          |          |
|----------------|----------|----------|----------|
| Frequencies -- | 7.6005   | 14.6215  | 16.1900  |
| Frequencies -- | 19.4163  | 23.1142  | 24.9575  |
| Frequencies -- | 29.1133  | 30.9520  | 32.0345  |
| Frequencies -- | 40.1076  | 41.1537  | 44.7085  |
| Frequencies -- | 51.0765  | 63.4378  | 66.7788  |
| Frequencies -- | 73.4269  | 86.0244  | 94.3290  |
| Frequencies -- | 103.1143 | 104.5818 | 105.5985 |
| Frequencies -- | 106.5945 | 109.1042 | 113.6853 |
| Frequencies -- | 115.6929 | 118.2091 | 119.1917 |
| Frequencies -- | 120.9103 | 122.2042 | 129.6208 |
| Frequencies -- | 138.5684 | 151.7508 | 152.7543 |
| Frequencies -- | 154.2036 | 157.3677 | 160.3864 |
| Frequencies -- | 161.5865 | 163.4038 | 168.3005 |
| Frequencies -- | 170.4927 | 177.0265 | 184.3287 |
| Frequencies -- | 195.4786 | 198.1118 | 203.4081 |
| Frequencies -- | 211.1534 | 217.6959 | 219.2597 |
| Frequencies -- | 231.2576 | 239.9431 | 251.9113 |
| Frequencies -- | 259.1224 | 264.5699 | 264.7365 |
| Frequencies -- | 265.2013 | 266.9182 | 270.9068 |
| Frequencies -- | 274.1145 | 278.5268 | 279.0295 |
| Frequencies -- | 285.7755 | 287.7673 | 292.4093 |
| Frequencies -- | 294.1782 | 297.5733 | 306.2712 |
| Frequencies -- | 307.3519 | 314.3998 | 319.8772 |
| Frequencies -- | 327.5565 | 331.0651 | 333.8518 |
| Frequencies -- | 340.0299 | 347.7632 | 348.0565 |
| Frequencies -- | 360.3590 | 378.6237 | 379.3772 |
| Frequencies -- | 379.4328 | 379.8818 | 386.7294 |
| Frequencies -- | 390.8630 | 392.6228 | 396.9082 |
| Frequencies -- | 417.4669 | 432.2293 | 432.7169 |
| Frequencies -- | 433.5164 | 452.5197 | 456.5142 |
| Frequencies -- | 457.5099 | 472.9010 | 509.5707 |
| Frequencies -- | 519.9055 | 532.3236 | 537.1060 |
| Frequencies -- | 541.4472 | 542.0608 | 542.6993 |
| Frequencies -- | 548.0614 | 556.0287 | 580.3671 |
| Frequencies -- | 581.6977 | 585.1301 | 592.9588 |
| Frequencies -- | 595.8194 | 596.8212 | 605.8119 |
| Frequencies -- | 610.7745 | 618.4569 | 630.8617 |
| Frequencies -- | 638.6080 | 639.6825 | 642.3163 |
| Frequencies -- | 659.6851 | 661.5138 | 688.8645 |
| Frequencies -- | 698.8069 | 725.2425 | 727.4220 |
| Frequencies -- | 728.6009 | 729.1839 | 743.1024 |
| Frequencies -- | 756.8788 | 758.3574 | 760.4901 |
| Frequencies -- | 770.9051 | 802.6838 | 804.9084 |
| Frequencies -- | 842.6501 | 848.1699 | 852.0643 |
| Frequencies -- | 862.2083 | 866.6055 | 907.4192 |
| Frequencies -- | 908.9519 | 911.2260 | 926.3127 |
| Frequencies -- | 953.2945 | 969.6686 | 975.3625 |

|                |           |           |           |
|----------------|-----------|-----------|-----------|
| Frequencies -- | 986.0500  | 1016.9288 | 1023.2087 |
| Frequencies -- | 1024.5022 | 1043.7519 | 1044.4929 |
| Frequencies -- | 1048.1888 | 1048.9444 | 1049.7171 |
| Frequencies -- | 1050.7097 | 1051.0385 | 1052.2537 |
| Frequencies -- | 1083.0418 | 1084.5608 | 1090.5727 |
| Frequencies -- | 1091.8383 | 1097.3645 | 1099.5133 |
| Frequencies -- | 1126.7477 | 1128.6391 | 1129.3896 |
| Frequencies -- | 1158.9757 | 1168.3458 | 1173.7156 |
| Frequencies -- | 1176.3310 | 1178.4239 | 1190.8351 |
| Frequencies -- | 1208.8943 | 1213.5804 | 1214.2258 |
| Frequencies -- | 1214.4657 | 1236.8150 | 1256.2892 |
| Frequencies -- | 1295.9300 | 1319.3774 | 1320.8495 |
| Frequencies -- | 1326.1186 | 1338.9395 | 1342.2526 |
| Frequencies -- | 1344.3429 | 1375.1790 | 1410.8072 |
| Frequencies -- | 1415.9437 | 1417.0970 | 1418.1456 |
| Frequencies -- | 1419.4634 | 1423.3319 | 1426.7292 |
| Frequencies -- | 1427.5094 | 1429.8379 | 1430.6689 |
| Frequencies -- | 1436.5177 | 1442.8713 | 1446.6325 |
| Frequencies -- | 1448.4106 | 1454.8544 | 1455.9964 |
| Frequencies -- | 1461.1609 | 1468.2587 | 1469.3452 |
| Frequencies -- | 1471.2382 | 1471.7463 | 1478.3199 |
| Frequencies -- | 1479.3991 | 1479.8196 | 1481.3356 |
| Frequencies -- | 1485.0180 | 1490.4855 | 1491.6320 |
| Frequencies -- | 1493.7346 | 1494.3635 | 1495.9901 |
| Frequencies -- | 1500.1246 | 1501.1062 | 1505.5640 |
| Frequencies -- | 1508.1975 | 1513.4586 | 1517.8111 |
| Frequencies -- | 1518.8814 | 1591.6760 | 1596.1111 |
| Frequencies -- | 1597.6113 | 1597.7770 | 1606.2165 |
| Frequencies -- | 1619.7362 | 1620.4707 | 1622.0618 |
| Frequencies -- | 2992.3396 | 3000.7453 | 3004.6823 |
| Frequencies -- | 3005.5356 | 3010.0266 | 3010.8505 |
| Frequencies -- | 3011.4817 | 3013.2224 | 3015.9851 |
| Frequencies -- | 3102.7329 | 3102.9104 | 3103.8630 |
| Frequencies -- | 3105.8109 | 3106.2167 | 3109.4534 |
| Frequencies -- | 3111.7177 | 3112.1676 | 3136.0371 |
| Frequencies -- | 3142.6087 | 3145.3791 | 3146.7612 |
| Frequencies -- | 3149.7047 | 3152.8263 | 3159.4031 |
| Frequencies -- | 3164.9680 | 3176.0179 | 3177.4602 |
| Frequencies -- | 3178.8133 | 3217.8002 | 3225.5078 |

**Catalyst 31:**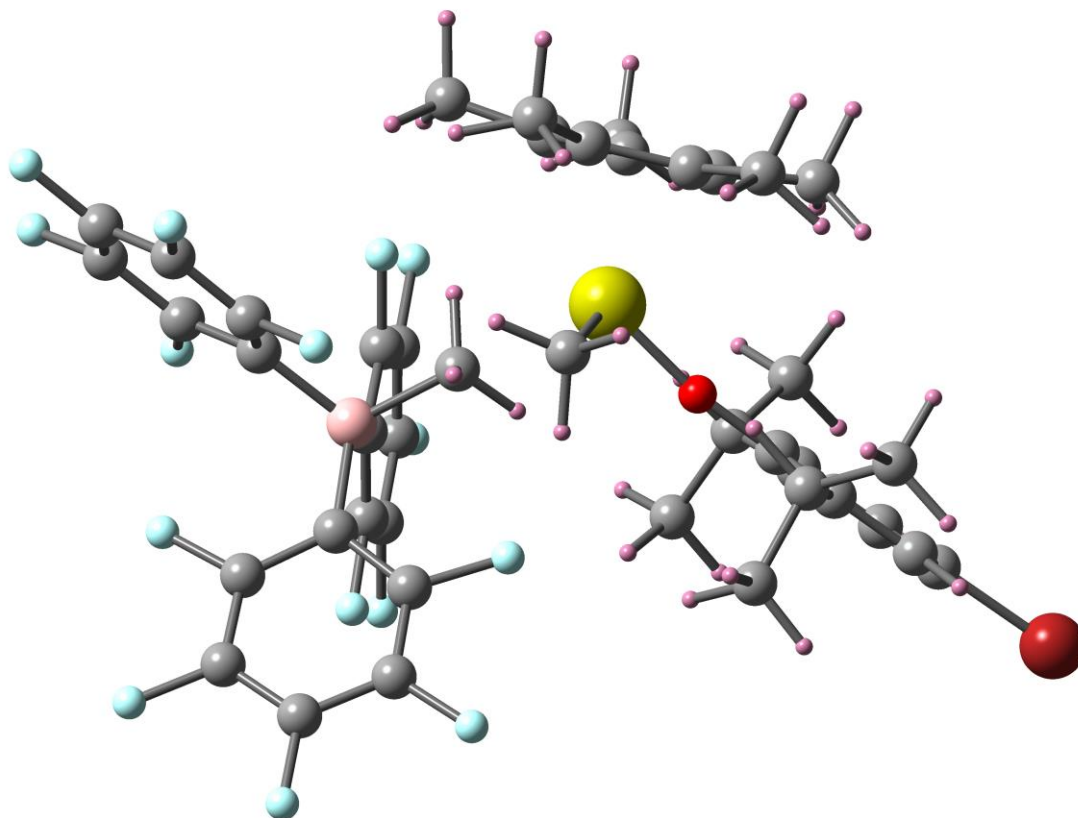

| vacuum        | toluene-like solvent | D3 dispersion |             |
|---------------|----------------------|---------------|-------------|
| -3290.6994976 | -3290.7098306        | -0.67119968   |             |
| Ti            | 1.03940200           | 2.10705000    | -0.04795700 |
| C             | 0.78456700           | 2.66272200    | 1.95134500  |
| H             | 0.89765000           | 1.71299700    | 2.50078600  |
| H             | 1.52147200           | 3.38644900    | 2.32497400  |
| H             | -0.22569900          | 3.06576900    | 2.11740400  |
| O             | 2.44119400           | 1.00601700    | 0.10387800  |
| C             | 3.62891500           | 0.26931000    | 0.08483000  |
| C             | 3.84195700           | -0.69757100   | -0.94901700 |
| C             | 4.58955500           | 0.48307800    | 1.12595400  |
| C             | 5.06437000           | -1.40883100   | -0.95003700 |
| C             | 5.79501400           | -0.25378500   | 1.07710300  |
| C             | 6.02746000           | -1.17458500   | 0.04335600  |
| H             | 5.25302000           | -2.15028700   | -1.72320200 |
| H             | 6.54266600           | -0.11012200   | 1.85366900  |
| C             | 0.82219000           | 3.10854900    | -2.21660500 |
| C             | -0.19882800          | 3.75640100    | -1.41287900 |
| C             | 2.11343700           | 3.46761600    | -1.67329800 |
| C             | 0.46005900           | 4.51142100    | -0.37599400 |
| C             | 1.88687900           | 4.31992400    | -0.52399100 |

|   |             |             |             |
|---|-------------|-------------|-------------|
| F | -1.86176500 | -4.14056800 | -4.63762700 |
| C | -1.96501400 | -3.32482700 | -3.51993000 |
| C | -1.89775000 | -3.86526800 | -2.22684300 |
| C | -2.12651100 | -1.93626300 | -3.65989900 |
| C | -1.99543900 | -3.01541600 | -1.10350900 |
| F | -1.72658600 | -5.23479400 | -2.06346500 |
| C | -2.22125000 | -1.13913000 | -2.50748300 |
| F | -2.19069100 | -1.36777100 | -4.92940800 |
| C | -2.16738900 | -1.61340100 | -1.17484700 |
| F | -1.90315200 | -3.67088200 | 0.12956500  |
| F | -2.41036500 | 0.23818300  | -2.75166000 |
| B | -2.23348300 | -0.56070700 | 0.11843200  |
| C | -2.11545200 | -1.32853300 | 1.59778000  |
| C | -0.93341400 | -1.48158700 | 2.35544300  |
| C | -3.24661800 | -1.89829000 | 2.23364300  |
| C | -0.85919400 | -2.09107300 | 3.62311800  |
| F | 0.31022200  | -1.04306300 | 1.85141800  |
| C | -3.23061900 | -2.52147800 | 3.49567400  |
| F | -4.48359700 | -1.91075500 | 1.57945700  |
| C | -2.02289200 | -2.61267000 | 4.20773800  |
| F | 0.35744600  | -2.18261700 | 4.29487500  |
| F | -4.39258500 | -3.05411300 | 4.04052200  |
| F | -1.97938600 | -3.21649400 | 5.45575000  |
| C | 2.77772200  | -1.05591700 | -1.99742100 |
| H | 1.98256100  | -0.29950400 | -1.94913500 |
| C | 4.32390800  | 1.41157100  | 2.31983000  |
| H | 3.47420600  | 2.05208300  | 2.06133300  |
| C | -3.62923000 | 0.36311400  | 0.13571700  |
| C | -3.74748500 | 1.50183500  | 0.96530300  |
| C | -4.80704100 | 0.10492200  | -0.60652800 |
| C | -4.87516600 | 2.34039800  | 1.03856100  |
| C | -5.96283600 | 0.91143700  | -0.57462700 |
| C | -5.99952800 | 2.04677000  | 0.25126300  |
| F | -4.90742600 | -1.02835200 | -1.41764100 |
| F | -7.07328600 | 0.58843700  | -1.34505700 |
| F | -7.12437500 | 2.85787800  | 0.29416400  |
| F | -4.88125500 | 3.45448100  | 1.87541800  |
| F | -2.68494100 | 1.86542300  | 1.82163700  |
| C | -0.90892000 | 0.50151500  | -0.12027700 |
| H | -0.85068000 | 1.07750600  | 0.81503100  |
| H | -0.03457100 | -0.13810000 | -0.29118900 |
| H | -1.17247800 | 1.11439700  | -0.98754300 |
| C | 2.12829300  | -2.43063200 | -1.65306900 |
| H | 1.33317800  | -2.66844100 | -2.37583500 |
| H | 2.87107800  | -3.24148500 | -1.69329400 |
| H | 1.69119400  | -2.42705000 | -0.64378500 |
| C | 3.32198100  | -1.05566500 | -3.45450000 |
| H | 4.04523700  | -1.86671700 | -3.62507300 |
| H | 2.49270000  | -1.20722800 | -4.16349500 |
| H | 3.82056600  | -0.10674100 | -3.70509400 |
| C | 3.90415300  | 0.57386500  | 3.56696200  |
| H | 4.72299100  | -0.08234700 | 3.90019100  |
| H | 3.64253500  | 1.24115700  | 4.40374400  |
| H | 3.03213700  | -0.06049600 | 3.34981400  |
| C | 5.51735100  | 2.34933300  | 2.65526500  |
| H | 5.84208400  | 2.92546600  | 1.77423800  |
| H | 5.21849900  | 3.06277000  | 3.43976200  |

|    |             |             |             |
|----|-------------|-------------|-------------|
| H  | 6.38970800  | 1.79745200  | 3.03595100  |
| C  | -0.21520200 | 5.46887600  | 0.57534900  |
| H  | -0.28583400 | 6.46606300  | 0.10666200  |
| H  | -1.23729200 | 5.15691100  | 0.82698900  |
| H  | 0.33850300  | 5.59093200  | 1.51454400  |
| C  | -1.67775100 | 3.80816800  | -1.72665300 |
| H  | -2.29702300 | 3.88081200  | -0.82334400 |
| H  | -1.88911800 | 4.70531800  | -2.33453700 |
| H  | -2.02143700 | 2.94198400  | -2.30392800 |
| C  | 0.57821700  | 2.34198800  | -3.49730100 |
| H  | 0.49817300  | 3.05171500  | -4.33933500 |
| H  | 1.39875300  | 1.65437300  | -3.73721400 |
| H  | -0.35371500 | 1.76339800  | -3.47935300 |
| C  | 3.46074500  | 3.17614100  | -2.29171400 |
| H  | 3.44512600  | 2.28431200  | -2.92864900 |
| H  | 3.76512100  | 4.02592100  | -2.92719200 |
| H  | 4.24832700  | 3.03379200  | -1.54003200 |
| C  | 2.96651600  | 5.02956300  | 0.25938800  |
| H  | 3.86980400  | 4.41628600  | 0.37796700  |
| H  | 3.26800900  | 5.94825400  | -0.27368400 |
| H  | 2.62879800  | 5.33269200  | 1.25847300  |
| Br | 7.72376800  | -2.16990000 | -0.00141400 |

|                |          |          |          |
|----------------|----------|----------|----------|
| Frequencies -- | 7.6242   | 10.6024  | 15.7302  |
| Frequencies -- | 18.8895  | 21.8114  | 25.8004  |
| Frequencies -- | 26.6394  | 27.6765  | 33.5308  |
| Frequencies -- | 34.7967  | 39.3279  | 45.5982  |
| Frequencies -- | 46.3072  | 50.4294  | 58.1773  |
| Frequencies -- | 61.1285  | 70.8640  | 76.6213  |
| Frequencies -- | 92.9547  | 96.4284  | 101.6298 |
| Frequencies -- | 103.2087 | 107.8519 | 109.1255 |
| Frequencies -- | 115.9093 | 119.4281 | 119.7416 |
| Frequencies -- | 120.3797 | 122.9718 | 128.5051 |
| Frequencies -- | 128.8121 | 129.8083 | 142.1478 |
| Frequencies -- | 146.0199 | 147.6842 | 151.2362 |
| Frequencies -- | 154.4548 | 155.4673 | 157.0665 |
| Frequencies -- | 160.4729 | 163.4711 | 166.4124 |
| Frequencies -- | 168.8930 | 177.5268 | 182.9491 |
| Frequencies -- | 194.0123 | 214.3202 | 216.3051 |
| Frequencies -- | 217.7166 | 220.7215 | 221.7396 |
| Frequencies -- | 224.2588 | 232.5871 | 245.4662 |
| Frequencies -- | 251.0817 | 256.5047 | 258.4571 |
| Frequencies -- | 262.8590 | 264.2188 | 264.3429 |
| Frequencies -- | 265.1176 | 265.9968 | 272.9477 |
| Frequencies -- | 275.1778 | 279.7585 | 287.5883 |
| Frequencies -- | 289.3539 | 291.4812 | 295.7969 |
| Frequencies -- | 299.4148 | 299.5046 | 303.7688 |
| Frequencies -- | 305.6283 | 307.3879 | 314.9975 |
| Frequencies -- | 319.9828 | 323.8601 | 327.7002 |
| Frequencies -- | 328.6110 | 333.9955 | 337.2406 |
| Frequencies -- | 353.6888 | 366.0803 | 377.6939 |
| Frequencies -- | 378.1324 | 379.7593 | 381.4260 |
| Frequencies -- | 387.4927 | 397.1751 | 401.2102 |
| Frequencies -- | 421.4557 | 427.1708 | 432.2651 |
| Frequencies -- | 432.6548 | 433.4805 | 433.9674 |
| Frequencies -- | 444.5186 | 456.4187 | 457.3912 |
| Frequencies -- | 466.2293 | 471.7130 | 506.4297 |
| Frequencies -- | 531.6117 | 535.1008 | 539.7395 |
| Frequencies -- | 540.9226 | 542.4884 | 548.2826 |
| Frequencies -- | 554.2683 | 566.5345 | 583.6083 |

|                |           |           |           |
|----------------|-----------|-----------|-----------|
| Frequencies -- | 587.0881  | 591.4416  | 596.8327  |
| Frequencies -- | 598.7112  | 608.6735  | 609.7425  |
| Frequencies -- | 618.4749  | 625.4513  | 629.9423  |
| Frequencies -- | 636.7399  | 638.1933  | 640.7464  |
| Frequencies -- | 653.1281  | 666.6118  | 696.0200  |
| Frequencies -- | 698.7638  | 721.2119  | 729.6064  |
| Frequencies -- | 739.8650  | 751.4942  | 761.9467  |
| Frequencies -- | 768.5936  | 770.3925  | 778.6214  |
| Frequencies -- | 801.2154  | 804.8005  | 806.8382  |
| Frequencies -- | 841.5887  | 850.1636  | 871.7376  |
| Frequencies -- | 878.6511  | 896.2439  | 903.1462  |
| Frequencies -- | 903.7790  | 910.8510  | 911.0090  |
| Frequencies -- | 925.7668  | 931.0956  | 934.3883  |
| Frequencies -- | 945.8851  | 963.7996  | 964.6421  |
| Frequencies -- | 968.4085  | 972.6283  | 1008.0532 |
| Frequencies -- | 1019.3917 | 1024.9904 | 1040.3675 |
| Frequencies -- | 1042.1937 | 1044.6127 | 1045.8401 |
| Frequencies -- | 1047.7423 | 1049.6065 | 1049.9614 |
| Frequencies -- | 1052.6109 | 1066.4359 | 1070.9905 |
| Frequencies -- | 1086.8414 | 1088.1586 | 1088.7126 |
| Frequencies -- | 1090.0608 | 1110.5501 | 1116.3554 |
| Frequencies -- | 1124.1853 | 1126.1428 | 1139.9686 |
| Frequencies -- | 1169.3496 | 1173.0814 | 1175.9464 |
| Frequencies -- | 1186.2149 | 1189.4489 | 1197.0386 |
| Frequencies -- | 1213.5423 | 1214.4163 | 1215.6464 |
| Frequencies -- | 1257.1824 | 1262.5784 | 1302.2943 |
| Frequencies -- | 1316.8768 | 1317.4355 | 1321.6252 |
| Frequencies -- | 1325.6254 | 1326.7943 | 1337.4622 |
| Frequencies -- | 1338.9825 | 1341.1486 | 1346.2823 |
| Frequencies -- | 1376.1390 | 1402.3741 | 1404.1391 |
| Frequencies -- | 1412.8180 | 1414.1847 | 1415.5599 |
| Frequencies -- | 1417.8920 | 1419.9219 | 1420.3373 |
| Frequencies -- | 1421.9372 | 1424.8508 | 1427.1880 |
| Frequencies -- | 1427.9436 | 1428.4184 | 1431.0857 |
| Frequencies -- | 1435.2747 | 1437.1836 | 1442.2761 |
| Frequencies -- | 1448.8583 | 1450.4592 | 1457.7406 |
| Frequencies -- | 1461.0683 | 1468.7039 | 1469.4023 |
| Frequencies -- | 1471.6557 | 1477.3164 | 1478.0439 |
| Frequencies -- | 1483.2405 | 1486.4359 | 1487.8490 |
| Frequencies -- | 1488.9424 | 1492.1481 | 1494.2580 |
| Frequencies -- | 1496.3623 | 1500.7839 | 1502.2524 |
| Frequencies -- | 1503.7752 | 1504.7057 | 1507.7199 |
| Frequencies -- | 1508.7125 | 1509.5749 | 1511.6556 |
| Frequencies -- | 1512.3044 | 1516.3940 | 1520.1636 |
| Frequencies -- | 1575.7247 | 1586.5700 | 1595.4057 |
| Frequencies -- | 1596.5948 | 1597.2862 | 1619.4146 |
| Frequencies -- | 1620.4080 | 1622.1117 | 3002.1569 |
| Frequencies -- | 3005.5589 | 3008.8413 | 3011.9740 |
| Frequencies -- | 3013.0782 | 3013.5207 | 3013.9342 |
| Frequencies -- | 3014.2662 | 3015.2944 | 3016.8939 |
| Frequencies -- | 3019.6861 | 3070.7362 | 3103.5285 |
| Frequencies -- | 3105.8372 | 3106.2512 | 3108.5545 |
| Frequencies -- | 3109.9691 | 3110.2177 | 3113.0529 |
| Frequencies -- | 3113.4418 | 3114.1270 | 3120.6257 |
| Frequencies -- | 3123.3770 | 3125.2039 | 3128.6843 |
| Frequencies -- | 3132.2267 | 3138.8784 | 3142.6352 |
| Frequencies -- | 3144.8727 | 3146.9452 | 3151.5551 |
| Frequencies -- | 3155.2628 | 3160.0841 | 3162.4227 |
| Frequencies -- | 3181.8566 | 3216.7533 | 3219.0152 |

**Catalyst 33:**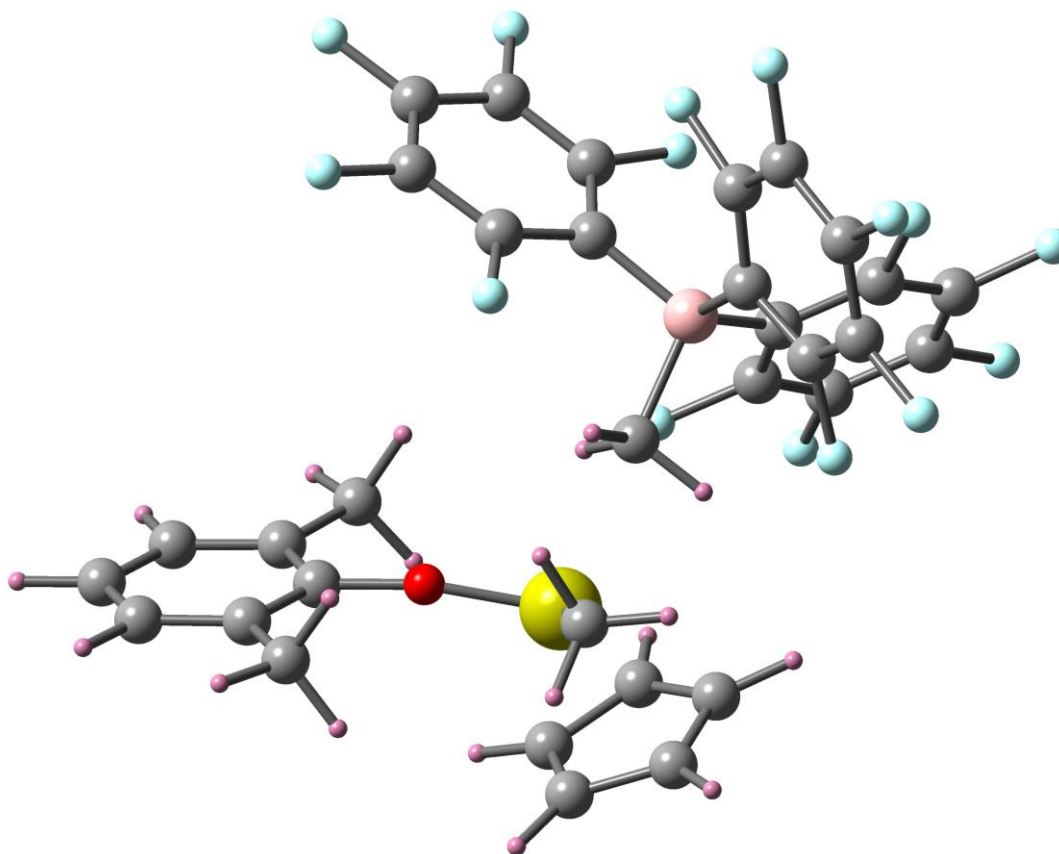

| <b>vacuum</b> | <b>toluene-like solvent</b> | <b>D3 dispersion</b> |             |
|---------------|-----------------------------|----------------------|-------------|
| -2924.520432  | -2924.5333682               | -0.48901926          |             |
| Ti            | -2.21192500                 | -1.98396900          | 0.50932600  |
| C             | -2.05923800                 | -2.30730500          | 2.56254800  |
| H             | -2.05933300                 | -1.29043800          | 2.99508200  |
| H             | -2.89462000                 | -2.88032500          | 2.99065100  |
| H             | -1.11009100                 | -2.81501200          | 2.79953300  |
| O             | -3.50431400                 | -0.77578600          | 0.43543900  |
| C             | -4.64821200                 | -0.02560300          | 0.15340600  |
| C             | -4.75058000                 | 0.63857900           | -1.10534900 |
| C             | -5.65738800                 | 0.06539700           | 1.15748200  |
| C             | -5.92083700                 | 1.39490800           | -1.34736100 |
| C             | -6.80570500                 | 0.83409100           | 0.85917400  |
| C             | -6.94233400                 | 1.49138700           | -0.38061000 |
| H             | -6.02434500                 | 1.91775800           | -2.29972200 |
| H             | -7.59256500                 | 0.92225700           | 1.61040200  |
| H             | -7.83532600                 | 2.08358000           | -0.58870100 |
| H             | -1.47287700                 | -2.87890800          | -2.36768600 |
| C             | -1.89578200                 | -3.32426900          | -1.47236200 |
| C             | -1.15677700                 | -3.99517600          | -0.43378600 |
| C             | -3.28622500                 | -3.35685500          | -1.12043700 |
| H             | -0.08204400                 | -4.15116600          | -0.41169400 |
| C             | -2.08885200                 | -4.43069100          | 0.56185000  |
| H             | -4.10593300                 | -2.94327500          | -1.69940300 |



|                |             |             |             |
|----------------|-------------|-------------|-------------|
| C              | -3.40511900 | -4.02424800 | 0.14608400  |
| H              | -1.84580100 | -4.96814400 | 1.47215400  |
| H              | -4.33011000 | -4.20893500 | 0.68539400  |
| F              | -0.72212700 | 5.72147900  | -1.27086000 |
| C              | -0.25452800 | 4.44988900  | -0.97414300 |
| C              | 0.73752700  | 3.84838800  | -1.76441800 |
| C              | -0.76077400 | 3.74098400  | 0.12794200  |
| C              | 1.19573200  | 2.55253100  | -1.44718500 |
| F              | 1.26449600  | 4.53932700  | -2.84860400 |
| C              | -0.27192800 | 2.45024900  | 0.39591700  |
| F              | -1.72999900 | 4.32028200  | 0.93999500  |
| C              | 0.70902000  | 1.77521000  | -0.37004800 |
| F              | 2.21784700  | 2.07402400  | -2.27475700 |
| F              | -0.80295200 | 1.84102200  | 1.55180000  |
| B              | 1.20291200  | 0.22877200  | 0.00097400  |
| C              | 2.07580700  | -0.47871700 | -1.22920200 |
| C              | 2.01636700  | 0.15796000  | 1.45348300  |
| C              | -0.23907400 | -0.69619600 | 0.21356600  |
| C              | 3.47138000  | -0.71405600 | -1.19678900 |
| C              | 1.47837700  | -0.91098800 | -2.43546400 |
| C              | 2.59468500  | 1.26922300  | 2.11176600  |
| C              | 2.20472000  | -1.05449400 | 2.15704100  |
| H              | -0.86192300 | -0.45396100 | -0.66127200 |
| H              | 0.12179400  | -1.73187500 | 0.23653800  |
| H              | -0.65801300 | -0.33517900 | 1.16137500  |
| C              | 4.19745100  | -1.34791400 | -2.22662300 |
| F              | 4.24428600  | -0.28432800 | -0.11335200 |
| C              | 2.15136000  | -1.54742200 | -3.49308600 |
| F              | 0.10415900  | -0.67333600 | -2.66962700 |
| C              | 3.25256800  | 1.20304000  | 3.35701900  |
| F              | 2.57801000  | 2.53757900  | 1.52239800  |
| C              | 2.85336700  | -1.17889600 | 3.39834700  |
| F              | 1.76315800  | -2.27416800 | 1.59539800  |
| C              | 3.53258000  | -1.77733300 | -3.38637400 |
| F              | 5.56690700  | -1.54577400 | -2.10776200 |
| F              | 1.46503300  | -1.94429800 | -4.63753900 |
| C              | 3.37904200  | -0.03148700 | 4.01396200  |
| F              | 3.78599900  | 2.34688700  | 3.93693900  |
| F              | 2.98156400  | -2.41985900 | 4.01461700  |
| F              | 4.22499700  | -2.40712700 | -4.40918400 |
| F              | 4.01897000  | -0.11880200 | 5.24093300  |
| C              | -3.64923000 | 0.57164200  | -2.14901900 |
| H              | -2.69909000 | 0.96769300  | -1.76057800 |
| H              | -3.45994400 | -0.45713400 | -2.49128200 |
| H              | -3.91561800 | 1.16674900  | -3.03244200 |
| C              | -5.51068200 | -0.61826600 | 2.50497700  |
| H              | -5.42561000 | -1.71183700 | 2.40311700  |
| H              | -4.61038900 | -0.27093500 | 3.03408800  |
| H              | -6.37929000 | -0.40870200 | 3.14349400  |
| Frequencies -- | 6.6977      | 12.3442     | 14.8152     |
| Frequencies -- | 16.1650     | 25.9849     | 26.6810     |
| Frequencies -- | 30.5211     | 31.7814     | 34.7348     |
| Frequencies -- | 40.1510     | 42.8331     | 45.3662     |
| Frequencies -- | 62.2725     | 80.7552     | 81.4538     |
| Frequencies -- | 102.3667    | 104.1667    | 107.6339    |
| Frequencies -- | 110.9245    | 116.0653    | 117.6017    |
| Frequencies -- | 119.7213    | 121.0528    | 124.9982    |

|                |           |           |           |
|----------------|-----------|-----------|-----------|
| Frequencies -- | 140.1605  | 147.1657  | 151.8568  |
| Frequencies -- | 153.0864  | 157.4373  | 160.0912  |
| Frequencies -- | 161.3564  | 162.5124  | 205.8557  |
| Frequencies -- | 211.4631  | 214.9982  | 218.0142  |
| Frequencies -- | 219.5464  | 221.6477  | 225.7878  |
| Frequencies -- | 227.3798  | 242.3307  | 261.0903  |
| Frequencies -- | 264.5522  | 264.9391  | 265.5237  |
| Frequencies -- | 266.2126  | 272.4552  | 273.1727  |
| Frequencies -- | 280.8820  | 289.3961  | 293.0657  |
| Frequencies -- | 308.0665  | 316.8691  | 319.4252  |
| Frequencies -- | 326.0788  | 333.3381  | 335.9039  |
| Frequencies -- | 340.4386  | 346.7289  | 351.7142  |
| Frequencies -- | 358.8812  | 379.5159  | 380.2878  |
| Frequencies -- | 380.4367  | 388.3834  | 391.4806  |
| Frequencies -- | 400.8664  | 431.5891  | 432.1253  |
| Frequencies -- | 432.3857  | 456.8411  | 457.5317  |
| Frequencies -- | 458.8167  | 478.5105  | 491.8759  |
| Frequencies -- | 513.2982  | 518.1751  | 541.1824  |
| Frequencies -- | 541.5750  | 547.4687  | 549.1374  |
| Frequencies -- | 552.4464  | 560.9906  | 565.2856  |
| Frequencies -- | 571.4768  | 594.8113  | 597.4539  |
| Frequencies -- | 600.6089  | 632.4909  | 639.3658  |
| Frequencies -- | 640.0889  | 642.7215  | 661.3189  |
| Frequencies -- | 663.5043  | 680.1155  | 694.2292  |
| Frequencies -- | 728.4782  | 729.5694  | 737.1526  |
| Frequencies -- | 742.9069  | 746.0720  | 759.3803  |
| Frequencies -- | 761.3579  | 771.1447  | 786.7401  |
| Frequencies -- | 797.7493  | 805.7864  | 816.6901  |
| Frequencies -- | 835.4568  | 840.6512  | 841.1934  |
| Frequencies -- | 865.0886  | 870.4858  | 871.4144  |
| Frequencies -- | 897.2296  | 906.7475  | 909.4072  |
| Frequencies -- | 910.2861  | 912.1634  | 922.1810  |
| Frequencies -- | 934.0402  | 990.8920  | 1003.3979 |
| Frequencies -- | 1018.1401 | 1021.5130 | 1026.0361 |
| Frequencies -- | 1027.4785 | 1036.5282 | 1047.8656 |
| Frequencies -- | 1049.9054 | 1050.1480 | 1052.3689 |
| Frequencies -- | 1054.5172 | 1059.6463 | 1076.6850 |
| Frequencies -- | 1086.8492 | 1090.1091 | 1096.1520 |
| Frequencies -- | 1108.2663 | 1110.7919 | 1127.3454 |
| Frequencies -- | 1187.6168 | 1194.5974 | 1198.5032 |
| Frequencies -- | 1215.9811 | 1217.1243 | 1217.4531 |
| Frequencies -- | 1279.2459 | 1280.6812 | 1286.0926 |
| Frequencies -- | 1320.2384 | 1321.1720 | 1326.1709 |
| Frequencies -- | 1338.6505 | 1342.0378 | 1343.1689 |
| Frequencies -- | 1361.6622 | 1390.1117 | 1397.6349 |
| Frequencies -- | 1417.1069 | 1418.0135 | 1418.7998 |
| Frequencies -- | 1420.9025 | 1422.0853 | 1424.8755 |
| Frequencies -- | 1426.7199 | 1439.6436 | 1442.5502 |
| Frequencies -- | 1447.9951 | 1450.6274 | 1455.0145 |
| Frequencies -- | 1469.5301 | 1470.2582 | 1472.0971 |
| Frequencies -- | 1473.3936 | 1489.3796 | 1491.4245 |
| Frequencies -- | 1502.8200 | 1503.0765 | 1595.0274 |
| Frequencies -- | 1596.3041 | 1596.8098 | 1604.0043 |
| Frequencies -- | 1606.5961 | 1620.0216 | 1620.8587 |
| Frequencies -- | 1622.4339 | 2983.3243 | 2988.8552 |
| Frequencies -- | 3018.2384 | 3025.4969 | 3102.9366 |
| Frequencies -- | 3107.3723 | 3110.5290 | 3132.1775 |
| Frequencies -- | 3134.0882 | 3135.8885 | 3137.8322 |
| Frequencies -- | 3160.5006 | 3167.4838 | 3178.4758 |
| Frequencies -- | 3198.1609 | 3240.5670 | 3243.9377 |
| Frequencies -- | 3257.0596 | 3265.3473 | 3279.6281 |

#### 4. Transition States for Transfer of H from Counterion to Cation ([return to table of contents](#))

##### Catalyst 1:

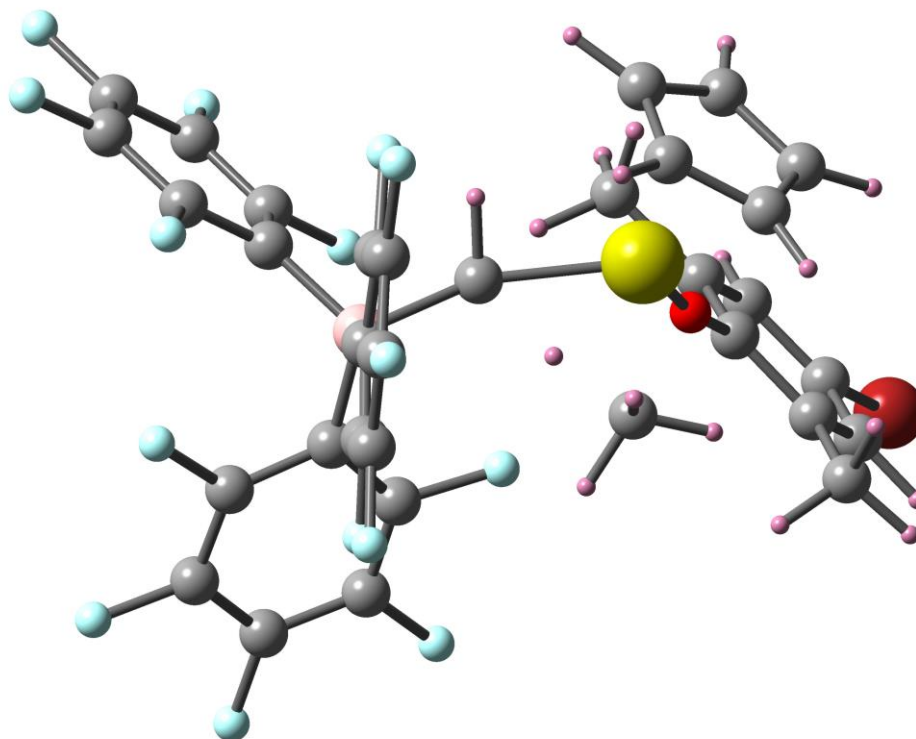

| vacuum        | toluene-like solvent | D3 dispersion |
|---------------|----------------------|---------------|
| -2937.0328612 | -2937.0465161        | -0.50581106   |

Imaginary frequency corresponding to vibration along the reaction coordinate:  $-1067 \text{ cm}^{-1}$ .

|    |             |             |             |
|----|-------------|-------------|-------------|
| Ti | -1.03590100 | 2.15729500  | 0.50226500  |
| C  | -0.24244300 | 2.43494900  | -1.66184800 |
| H  | -0.04616400 | 1.65971200  | -2.41614700 |
| H  | -1.22947400 | 2.85607800  | -1.89932800 |
| H  | 0.51801300  | 3.21823400  | -1.73802500 |
| O  | -2.60346600 | 1.38088700  | 0.20802300  |
| C  | -3.89641600 | 0.86743800  | 0.17731100  |
| C  | -4.31340100 | -0.02120100 | 1.21149300  |
| C  | -4.75211800 | 1.24050600  | -0.89973500 |
| C  | -5.63432200 | -0.52198200 | 1.15765500  |
| C  | -6.06381600 | 0.71520300  | -0.91737700 |
| C  | -6.49306500 | -0.15109800 | 0.10589400  |
| H  | -5.97730200 | -1.20356500 | 1.93499900  |
| H  | -6.73568300 | 0.98172700  | -1.73231100 |
| H  | -2.11481600 | 3.03232200  | 3.23543300  |
| C  | -1.50800700 | 3.45164800  | 2.43750800  |
| C  | -0.06577800 | 3.44029100  | 2.37149900  |
| C  | -1.99722700 | 4.19338500  | 1.30789400  |
| H  | 0.60276200  | 2.97674300  | 3.09139500  |

|    |             |             |             |
|----|-------------|-------------|-------------|
| C  | 0.32844400  | 4.12705600  | 1.18519000  |
| H  | -3.04060500 | 4.39513000  | 1.08286000  |
| C  | -0.86576300 | 4.58293000  | 0.51702700  |
| H  | 1.34827200  | 4.27383800  | 0.84492000  |
| H  | -0.89873500 | 5.16340300  | -0.40000600 |
| F  | 0.38787600  | -4.60102400 | -3.89799800 |
| C  | 0.68221800  | -3.57053400 | -3.01789100 |
| C  | 1.97953200  | -3.41918700 | -2.49793900 |
| C  | -0.30711300 | -2.65352000 | -2.63277500 |
| C  | 2.24696200  | -2.36458000 | -1.60724400 |
| F  | 2.98104400  | -4.30492300 | -2.87455000 |
| C  | 0.01899200  | -1.61543400 | -1.73665900 |
| F  | -1.59835200 | -2.77181000 | -3.13852000 |
| C  | 1.29439000  | -1.41020300 | -1.17155300 |
| F  | 3.56982400  | -2.26400000 | -1.16478000 |
| F  | -1.05111400 | -0.74728100 | -1.43692800 |
| B  | 1.72210200  | -0.25554100 | -0.04538300 |
| C  | 2.28397000  | -1.14103600 | 1.27234900  |
| C  | 2.82196500  | 0.86315900  | -0.61217800 |
| C  | 0.43029500  | 0.67093300  | 0.52303900  |
| C  | 3.62772800  | -1.24788300 | 1.70727200  |
| C  | 1.39422400  | -1.92698800 | 2.04265000  |
| C  | 3.21459300  | 1.03227600  | -1.95965200 |
| C  | 3.39972100  | 1.82543100  | 0.25029700  |
| H  | -0.41836900 | -0.00078000 | 0.74798700  |
| H  | 0.82302400  | 1.16769100  | 1.43106000  |
| H  | 0.17564500  | 1.57656900  | -0.70067200 |
| C  | 4.04599500  | -2.01875600 | 2.81184800  |
| F  | 4.65708500  | -0.58972100 | 1.03137100  |
| C  | 1.75789300  | -2.71385000 | 3.15095300  |
| F  | 0.02633200  | -1.98451400 | 1.69933600  |
| C  | 4.13067300  | 2.00835300  | -2.40775600 |
| F  | 2.67173900  | 0.23181700  | -2.97384100 |
| C  | 4.30916700  | 2.82212900  | -0.14036500 |
| F  | 3.06277800  | 1.82401700  | 1.61896500  |
| C  | 3.10412100  | -2.75561400 | 3.54790800  |
| F  | 5.38590800  | -2.06149900 | 3.17626600  |
| F  | 0.80235700  | -3.44529800 | 3.84996800  |
| C  | 4.69256400  | 2.90951900  | -1.49007300 |
| F  | 4.46589400  | 2.09794200  | -3.75327100 |
| F  | 4.82350700  | 3.72289400  | 0.78757400  |
| F  | 3.49564400  | -3.51624300 | 4.63949700  |
| F  | 5.58689700  | 3.88310000  | -1.90852200 |
| C  | -3.38526200 | -0.44801300 | 2.33466900  |
| H  | -2.52820900 | -1.02126700 | 1.95211100  |
| H  | -2.98626100 | 0.41636300  | 2.88880100  |
| H  | -3.91278900 | -1.08587300 | 3.05575900  |
| C  | -4.27825300 | 2.15073200  | -2.01823000 |
| H  | -3.91456500 | 3.11608200  | -1.63206800 |
| H  | -3.45445300 | 1.68448900  | -2.58092900 |
| H  | -5.09096700 | 2.35988200  | -2.72632400 |
| Br | -8.32233700 | -0.86269000 | 0.06100600  |

|                |            |         |         |
|----------------|------------|---------|---------|
| Frequencies -- | -1067.2478 | 8.9848  | 10.9244 |
| Frequencies -- | 19.9051    | 26.2355 | 27.4697 |
| Frequencies -- | 29.0179    | 32.5599 | 36.9614 |
| Frequencies -- | 38.9138    | 40.3233 | 43.7078 |

|                |           |           |           |
|----------------|-----------|-----------|-----------|
| Frequencies -- | 48.5773   | 61.0562   | 73.6806   |
| Frequencies -- | 76.6272   | 101.8292  | 107.3321  |
| Frequencies -- | 111.3786  | 120.3382  | 122.1725  |
| Frequencies -- | 126.5722  | 135.2095  | 137.3865  |
| Frequencies -- | 140.5030  | 141.7091  | 145.1679  |
| Frequencies -- | 147.3017  | 149.8217  | 152.8092  |
| Frequencies -- | 156.3253  | 160.9581  | 161.5340  |
| Frequencies -- | 169.7308  | 181.8900  | 202.7123  |
| Frequencies -- | 204.0165  | 215.5043  | 216.4179  |
| Frequencies -- | 221.6765  | 222.0527  | 223.7619  |
| Frequencies -- | 230.0017  | 240.8516  | 247.5903  |
| Frequencies -- | 260.8624  | 264.2016  | 264.5178  |
| Frequencies -- | 264.9074  | 267.2849  | 275.2742  |
| Frequencies -- | 275.8259  | 282.1726  | 302.9202  |
| Frequencies -- | 303.5553  | 313.3784  | 320.8530  |
| Frequencies -- | 326.1317  | 329.6123  | 336.5572  |
| Frequencies -- | 348.0525  | 356.2185  | 363.6822  |
| Frequencies -- | 375.8690  | 377.8200  | 379.0712  |
| Frequencies -- | 381.5949  | 393.4769  | 401.8793  |
| Frequencies -- | 425.4891  | 431.5679  | 432.2706  |
| Frequencies -- | 433.2980  | 450.9742  | 456.8930  |
| Frequencies -- | 463.8386  | 481.8062  | 502.1078  |
| Frequencies -- | 508.2669  | 537.1944  | 537.9915  |
| Frequencies -- | 544.3827  | 553.9122  | 563.9766  |
| Frequencies -- | 566.6637  | 567.4596  | 568.0869  |
| Frequencies -- | 572.0749  | 576.6482  | 596.1000  |
| Frequencies -- | 607.1856  | 634.7641  | 636.2049  |
| Frequencies -- | 638.1680  | 643.7749  | 655.3708  |
| Frequencies -- | 675.0374  | 707.9814  | 719.1574  |
| Frequencies -- | 725.4998  | 727.7389  | 736.0941  |
| Frequencies -- | 748.8833  | 750.0491  | 763.1412  |
| Frequencies -- | 772.9326  | 780.7664  | 801.5196  |
| Frequencies -- | 804.4966  | 814.0225  | 838.3752  |
| Frequencies -- | 841.0968  | 849.7799  | 868.5820  |
| Frequencies -- | 871.3375  | 881.5171  | 884.8594  |
| Frequencies -- | 888.4783  | 889.3790  | 898.3146  |
| Frequencies -- | 902.9804  | 912.3303  | 919.5235  |
| Frequencies -- | 934.5692  | 949.4552  | 1002.5882 |
| Frequencies -- | 1010.0913 | 1018.0666 | 1021.7081 |
| Frequencies -- | 1028.2512 | 1033.6026 | 1039.8187 |
| Frequencies -- | 1050.0916 | 1050.5910 | 1053.3079 |
| Frequencies -- | 1054.8780 | 1056.5831 | 1060.3079 |
| Frequencies -- | 1085.9473 | 1088.9567 | 1090.7252 |
| Frequencies -- | 1123.7696 | 1126.7364 | 1208.5521 |
| Frequencies -- | 1211.8841 | 1214.6561 | 1216.8637 |
| Frequencies -- | 1265.4565 | 1266.7342 | 1280.6462 |
| Frequencies -- | 1287.4997 | 1288.4409 | 1318.1711 |
| Frequencies -- | 1319.7528 | 1325.3724 | 1338.8388 |
| Frequencies -- | 1342.1214 | 1344.5794 | 1349.6201 |
| Frequencies -- | 1355.4795 | 1389.2627 | 1392.6391 |
| Frequencies -- | 1412.2319 | 1414.6873 | 1420.0778 |
| Frequencies -- | 1421.4377 | 1423.0236 | 1425.7666 |
| Frequencies -- | 1429.6053 | 1436.9329 | 1452.2413 |
| Frequencies -- | 1465.9035 | 1468.0850 | 1469.2268 |
| Frequencies -- | 1471.7552 | 1486.3250 | 1491.2317 |
| Frequencies -- | 1491.5875 | 1503.2479 | 1505.2611 |
| Frequencies -- | 1588.2991 | 1591.3335 | 1593.8093 |
| Frequencies -- | 1595.7749 | 1597.6468 | 1618.1781 |
| Frequencies -- | 1619.9464 | 1622.6628 | 1830.1501 |
| Frequencies -- | 2973.5849 | 3014.7731 | 3022.2786 |
| Frequencies -- | 3038.4902 | 3078.4060 | 3100.5694 |
| Frequencies -- | 3110.3979 | 3135.9947 | 3138.7465 |
| Frequencies -- | 3140.9502 | 3189.2172 | 3202.5228 |

|                |           |           |           |
|----------------|-----------|-----------|-----------|
| Frequencies -- | 3204.4169 | 3235.6615 | 3242.6822 |
| Frequencies -- | 3254.8340 | 3259.7821 | 3279.1552 |

**Catalyst 2:**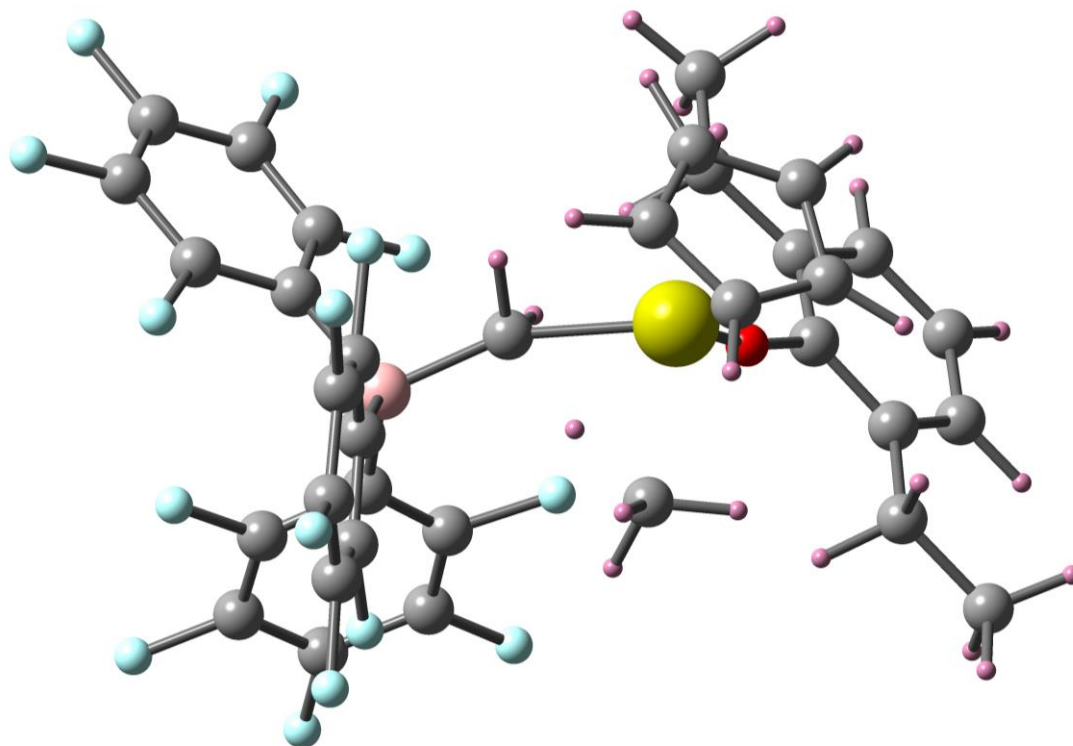

| <b>vacuum</b> | <b>toluene-like solvent</b> | <b>D3 dispersion</b> |
|---------------|-----------------------------|----------------------|
| -3003.0479695 | -3003.0611067               | -0.53199011          |

Imaginary frequency corresponding to vibration along the reaction coordinate:  $-1067 \text{ cm}^{-1}$ .

|    |             |             |             |
|----|-------------|-------------|-------------|
| Ti | 1.90130800  | 1.60618000  | -0.85487700 |
| C  | 1.19502000  | 2.46007500  | 1.18495100  |
| H  | 1.00079700  | 1.85499600  | 2.08132100  |
| H  | 2.21971400  | 2.84826300  | 1.28007600  |
| H  | 0.49747600  | 3.30300700  | 1.15313500  |
| O  | 3.28559600  | 0.61466100  | -0.36929600 |
| C  | 4.48471400  | -0.09307300 | -0.24529200 |
| C  | 4.73063400  | -1.17721200 | -1.14236000 |
| C  | 5.39262400  | 0.29517000  | 0.78532000  |
| C  | 5.95870600  | -1.86167700 | -0.99564000 |
| C  | 6.60043100  | -0.43180600 | 0.88286400  |
| C  | 6.88500800  | -1.49267900 | 0.00003700  |
| H  | 6.19099800  | -2.69433200 | -1.65711200 |
| H  | 7.32151300  | -0.17484300 | 1.65661600  |
| H  | 7.82488400  | -2.03999100 | 0.09524200  |
| H  | 1.46116600  | 1.67103900  | -3.91477100 |
| C  | 1.75201100  | 2.36546100  | -3.13004400 |
| C  | 0.86370600  | 3.22178700  | -2.39297700 |
| C  | 3.09641300  | 2.60950900  | -2.67522500 |
| H  | -0.21152100 | 3.28282100  | -2.51809500 |
| C  | 1.65776600  | 3.97818900  | -1.46951900 |
| H  | 3.99608400  | 2.12408600  | -3.04209200 |

|   |             |             |             |
|---|-------------|-------------|-------------|
| C | 3.03563300  | 3.60374500  | -1.64391400 |
| H | 1.28620200  | 4.72528300  | -0.77524800 |
| H | 3.88328800  | 4.00952500  | -1.09828100 |
| F | -0.69500700 | -3.65076100 | 4.84383600  |
| C | -0.80543500 | -2.80584000 | 3.74932700  |
| C | -2.06083100 | -2.52537200 | 3.18253600  |
| C | 0.33327500  | -2.20961400 | 3.18757800  |
| C | -2.13983300 | -1.66538100 | 2.07295400  |
| F | -3.20597200 | -3.09333200 | 3.72701900  |
| C | 0.19355900  | -1.35428400 | 2.07576500  |
| F | 1.58914800  | -2.46329700 | 3.73210300  |
| C | -1.03135200 | -1.03525000 | 1.45432700  |
| F | -3.42830300 | -1.41617200 | 1.58938100  |
| F | 1.40402000  | -0.80382400 | 1.60949000  |
| B | -1.25490200 | -0.10148600 | 0.08809800  |
| C | -1.96505200 | -1.15845600 | -1.01622100 |
| C | -2.14500100 | 1.28218500  | 0.36157100  |
| C | 0.16980900  | 0.45238800  | -0.62751300 |
| C | -3.31398200 | -1.14953300 | -1.44897900 |
| C | -1.21940100 | -2.22657300 | -1.57031600 |
| C | -2.45688600 | 1.83017300  | 1.62690900  |
| C | -2.59007900 | 2.09310100  | -0.70955900 |
| H | 0.87582000  | -0.39522000 | -0.70059000 |
| H | -0.14083800 | 0.81771100  | -1.62536800 |
| H | 0.60687500  | 1.52754100  | 0.39999400  |
| C | -3.86118000 | -2.07342500 | -2.36377500 |
| F | -4.21957500 | -0.20417700 | -0.96360400 |
| C | -1.71519400 | -3.17417200 | -2.48459000 |
| F | 0.12536200  | -2.42297400 | -1.18844500 |
| C | -3.18784100 | 3.02180500  | 1.82220700  |
| F | -2.01217800 | 1.21760800  | 2.80668500  |
| C | -3.31459700 | 3.28917200  | -0.57511200 |
| F | -2.30243000 | 1.71227500  | -2.03554300 |
| C | -3.05553400 | -3.09349800 | -2.89465200 |
| F | -5.19530100 | -1.98734500 | -2.74230500 |
| F | -0.89494400 | -4.18405500 | -2.97982000 |
| C | -3.63108500 | 3.75739600  | 0.71195900  |
| F | -3.45634200 | 3.48413500  | 3.10524700  |
| F | -3.71163300 | 4.01342000  | -1.69502100 |
| F | -3.57404600 | -4.00902300 | -3.79863100 |
| F | -4.34371000 | 4.93530700  | 0.88004800  |
| C | 3.68418000  | -1.57661600 | -2.18449000 |
| H | 2.76147800  | -1.86534200 | -1.65570600 |
| C | 5.03229900  | 1.43196600  | 1.74289300  |
| H | 4.06865700  | 1.18356300  | 2.21850700  |
| C | 4.06293400  | -2.72076700 | -3.14968000 |
| H | 3.22950000  | -2.90428300 | -3.84522300 |
| H | 4.95498000  | -2.48087700 | -3.74973900 |
| H | 4.25144300  | -3.66245600 | -2.61211800 |
| C | 6.05782700  | 1.75918800  | 2.85008400  |
| H | 7.02981100  | 2.06995100  | 2.43594700  |
| H | 5.68068100  | 2.58790900  | 3.46963400  |
| H | 6.22620200  | 0.89956500  | 3.51655500  |
| H | 4.85224300  | 2.34806800  | 1.15253800  |
| H | 3.42212300  | -0.68834300 | -2.78655600 |

Frequencies -- -1067.1387

12.8762

14.8625



|                |           |           |           |
|----------------|-----------|-----------|-----------|
| Frequencies -- | 20.9310   | 23.9972   | 28.2653   |
| Frequencies -- | 30.1356   | 32.2717   | 34.5870   |
| Frequencies -- | 39.1938   | 41.2013   | 41.8663   |
| Frequencies -- | 49.9843   | 52.7636   | 60.4120   |
| Frequencies -- | 72.4587   | 75.6369   | 93.4391   |
| Frequencies -- | 102.5390  | 110.2819  | 112.1171  |
| Frequencies -- | 121.9567  | 123.5950  | 125.4437  |
| Frequencies -- | 135.4012  | 139.8313  | 141.4278  |
| Frequencies -- | 146.0206  | 151.3573  | 156.2121  |
| Frequencies -- | 160.2477  | 161.1659  | 170.0614  |
| Frequencies -- | 174.7740  | 187.1034  | 190.0030  |
| Frequencies -- | 206.0454  | 211.4260  | 215.5987  |
| Frequencies -- | 217.4909  | 221.7347  | 223.3264  |
| Frequencies -- | 239.4046  | 256.7436  | 263.4496  |
| Frequencies -- | 264.5151  | 264.8244  | 265.2408  |
| Frequencies -- | 274.3687  | 275.2572  | 278.1229  |
| Frequencies -- | 282.3194  | 292.5907  | 295.7123  |
| Frequencies -- | 301.9866  | 305.0448  | 310.7307  |
| Frequencies -- | 324.1948  | 325.2819  | 327.2499  |
| Frequencies -- | 332.6109  | 337.4314  | 354.6351  |
| Frequencies -- | 361.4123  | 367.8902  | 375.9514  |
| Frequencies -- | 377.6131  | 378.9247  | 381.2131  |
| Frequencies -- | 390.8280  | 401.5852  | 430.7237  |
| Frequencies -- | 432.1538  | 432.9742  | 450.4741  |
| Frequencies -- | 456.6823  | 463.9383  | 485.0032  |
| Frequencies -- | 505.1268  | 528.0812  | 536.9183  |
| Frequencies -- | 538.5177  | 543.3976  | 545.5458  |
| Frequencies -- | 555.7918  | 565.8878  | 568.2348  |
| Frequencies -- | 571.6879  | 577.8180  | 597.7706  |
| Frequencies -- | 603.8687  | 611.4428  | 634.9988  |
| Frequencies -- | 636.2870  | 638.1658  | 643.0945  |
| Frequencies -- | 656.1976  | 674.2309  | 708.3789  |
| Frequencies -- | 710.8453  | 718.8731  | 724.7848  |
| Frequencies -- | 730.5546  | 736.2398  | 748.4208  |
| Frequencies -- | 749.4905  | 762.5904  | 772.7553  |
| Frequencies -- | 773.7417  | 778.6444  | 793.0165  |
| Frequencies -- | 797.1319  | 813.2896  | 830.5594  |
| Frequencies -- | 837.5739  | 840.2763  | 848.8383  |
| Frequencies -- | 852.4495  | 863.9009  | 872.8790  |
| Frequencies -- | 880.5180  | 889.2062  | 892.1267  |
| Frequencies -- | 902.5806  | 912.3829  | 920.9198  |
| Frequencies -- | 924.6995  | 938.2452  | 995.0298  |
| Frequencies -- | 995.6571  | 1007.1901 | 1019.4201 |
| Frequencies -- | 1025.4322 | 1028.3826 | 1029.2273 |
| Frequencies -- | 1032.3513 | 1040.8016 | 1050.4890 |
| Frequencies -- | 1052.9900 | 1056.4997 | 1058.2677 |
| Frequencies -- | 1087.9779 | 1091.3649 | 1093.5427 |
| Frequencies -- | 1095.2712 | 1097.9547 | 1102.1252 |
| Frequencies -- | 1120.3344 | 1126.4430 | 1186.8602 |
| Frequencies -- | 1203.7575 | 1211.1888 | 1214.2389 |
| Frequencies -- | 1216.2969 | 1256.4240 | 1260.2115 |
| Frequencies -- | 1279.0331 | 1283.1936 | 1284.5462 |
| Frequencies -- | 1289.0907 | 1293.1435 | 1318.0989 |
| Frequencies -- | 1319.4753 | 1324.8385 | 1326.8957 |
| Frequencies -- | 1338.3600 | 1342.3594 | 1343.0355 |
| Frequencies -- | 1344.4918 | 1350.0133 | 1380.2959 |
| Frequencies -- | 1391.6414 | 1392.2302 | 1411.8612 |
| Frequencies -- | 1413.5164 | 1417.1311 | 1420.2892 |
| Frequencies -- | 1422.6448 | 1432.7577 | 1441.6578 |
| Frequencies -- | 1447.6770 | 1464.5972 | 1468.0606 |
| Frequencies -- | 1468.4627 | 1469.0890 | 1471.5451 |
| Frequencies -- | 1480.3599 | 1493.2543 | 1499.4997 |
| Frequencies -- | 1500.8766 | 1505.8775 | 1506.1944 |

|                |           |           |           |
|----------------|-----------|-----------|-----------|
| Frequencies -- | 1509.2468 | 1593.9846 | 1596.0038 |
| Frequencies -- | 1597.7884 | 1599.1835 | 1606.7432 |
| Frequencies -- | 1617.9082 | 1619.7860 | 1622.5290 |
| Frequencies -- | 1833.0125 | 2971.7243 | 3003.8050 |
| Frequencies -- | 3007.4633 | 3014.9049 | 3015.8219 |
| Frequencies -- | 3034.7576 | 3058.3421 | 3068.5911 |
| Frequencies -- | 3076.8286 | 3115.5448 | 3118.3121 |
| Frequencies -- | 3122.7448 | 3122.9098 | 3136.8838 |
| Frequencies -- | 3172.5082 | 3184.9569 | 3207.5024 |
| Frequencies -- | 3215.9002 | 3232.3420 | 3237.8217 |
| Frequencies -- | 3254.9692 | 3262.0647 | 3282.4968 |

**Catalyst 3:**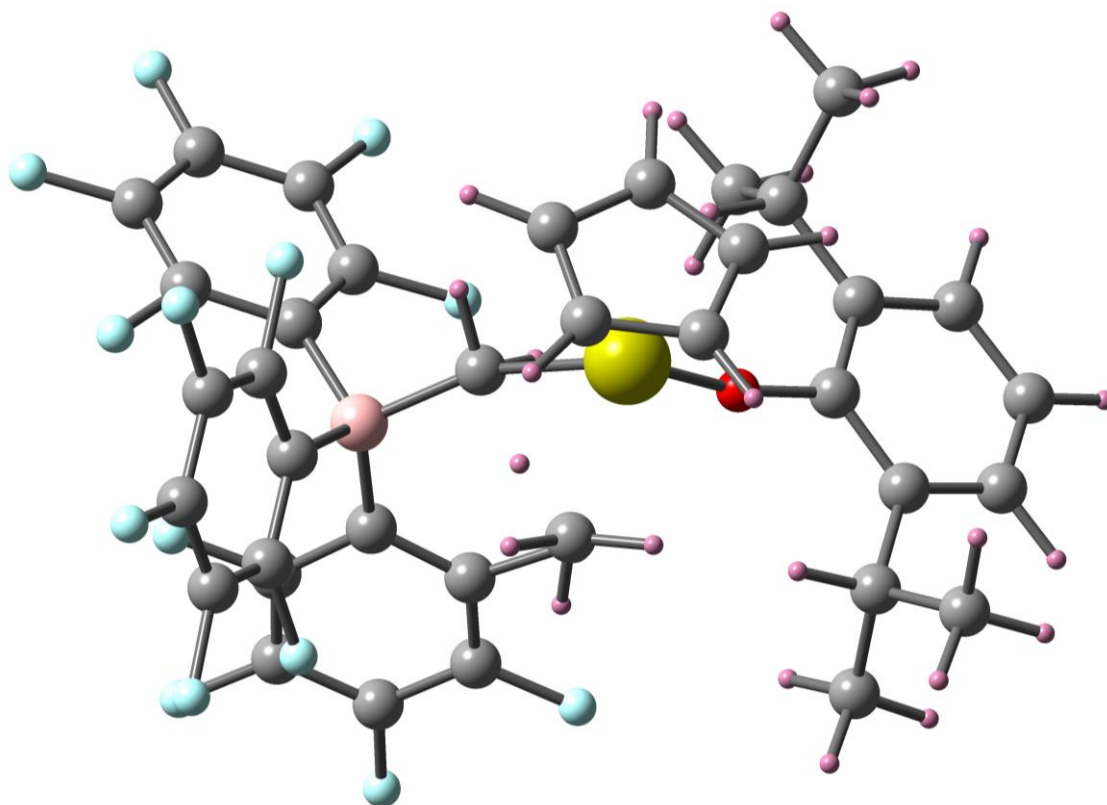

| <b>vacuum</b> | <b>toluene-like solvent</b> | <b>D3 dispersion</b> |
|---------------|-----------------------------|----------------------|
| -3081.6249164 | -3081.6377961               | -0.57071572          |

Imaginary frequency corresponding to vibration along the reaction coordinate:  $-1051 \text{ cm}^{-1}$ .

|    |             |             |             |
|----|-------------|-------------|-------------|
| Ti | 1.75506200  | 1.55364600  | -0.87870000 |
| C  | 1.01283400  | 2.48720200  | 1.12479100  |
| H  | 0.92488000  | 1.88637000  | 2.03953300  |
| H  | 1.99298000  | 2.98375700  | 1.15297900  |
| H  | 0.24031400  | 3.26286100  | 1.11024900  |
| O  | 3.13984600  | 0.58184600  | -0.35729400 |
| C  | 4.34321200  | -0.12063700 | -0.20480800 |
| C  | 4.68744400  | -1.11830300 | -1.17099200 |
| C  | 5.16622700  | 0.17968000  | 0.92465600  |
| C  | 5.91914400  | -1.79084200 | -0.99011500 |
| C  | 6.38145400  | -0.53326700 | 1.04670000  |
| C  | 6.76182400  | -1.50162000 | 0.09915800  |
| H  | 6.21695700  | -2.55681900 | -1.70666700 |
| H  | 7.03278800  | -0.33266600 | 1.89773500  |
| H  | 7.70545900  | -2.03818900 | 0.21531700  |
| H  | 2.08050700  | 1.43332800  | -3.91209500 |
| C  | 2.00650100  | 2.19698700  | -3.14212600 |
| C  | 0.79517600  | 2.86183500  | -2.72552400 |
| C  | 3.10904300  | 2.78171800  | -2.42560100 |
| H  | -0.20283300 | 2.66852500  | -3.10359800 |
| C  | 1.14675200  | 3.81476700  | -1.72268200 |
| H  | 4.15401500  | 2.50252400  | -2.52207700 |

|   |             |             |             |
|---|-------------|-------------|-------------|
| C | 2.57474200  | 3.76157900  | -1.52817500 |
| H | 0.45853900  | 4.47217400  | -1.19997200 |
| H | 3.14839000  | 4.37645800  | -0.83982600 |
| F | -1.01249000 | -3.36693300 | 5.06175600  |
| C | -1.08690900 | -2.59038200 | 3.91492300  |
| C | -2.32552100 | -2.32721900 | 3.30432200  |
| C | 0.07192400  | -2.04650700 | 3.34180700  |
| C | -2.36797500 | -1.53498100 | 2.14337900  |
| F | -3.49053500 | -2.84362900 | 3.85769400  |
| C | -0.03100300 | -1.26000500 | 2.17664200  |
| F | 1.31358300  | -2.28257900 | 3.92746900  |
| C | -1.23743800 | -0.95909400 | 1.51164900  |
| F | -3.64207000 | -1.29646400 | 1.61865000  |
| F | 1.19984400  | -0.76208400 | 1.70373800  |
| B | -1.41875100 | -0.10168600 | 0.09006100  |
| C | -2.12119100 | -1.20726600 | -0.96881400 |
| C | -2.29842300 | 1.30587400  | 0.26203100  |
| C | 0.03270400  | 0.39212500  | -0.61497200 |
| C | -3.46037000 | -1.20470200 | -1.43075200 |
| C | -1.37821100 | -2.31284800 | -1.44758900 |
| C | -2.63760300 | 1.92887900  | 1.48481700  |
| C | -2.70337600 | 2.05924200  | -0.86564700 |
| H | 0.73814100  | -0.45859900 | -0.60957200 |
| H | -0.23990300 | 0.69429700  | -1.64604300 |
| H | 0.44476600  | 1.53251900  | 0.36313200  |
| C | -3.99940900 | -2.16786600 | -2.30909800 |
| F | -4.36395700 | -0.22443200 | -1.01505800 |
| C | -1.86614600 | -3.29990800 | -2.32353600 |
| F | -0.04624600 | -2.50376600 | -1.02436900 |
| C | -3.35379100 | 3.14065200  | 1.59128400  |
| F | -2.23668400 | 1.37760500  | 2.70943300  |
| C | -3.41190800 | 3.27149400  | -0.82010400 |
| F | -2.39327900 | 1.59444900  | -2.15929700 |
| C | -3.19567000 | -3.22369600 | -2.76833200 |
| F | -5.32357300 | -2.08503100 | -2.72222400 |
| F | -1.04849300 | -4.34394300 | -2.74742400 |
| C | -3.75415900 | 3.81815900  | 0.42892600  |
| F | -3.64936500 | 3.67992200  | 2.83791100  |
| F | -3.76967400 | 3.93426700  | -1.99008200 |
| F | -3.70618300 | -4.17798500 | -3.63617600 |
| F | -4.45038900 | 5.01507400  | 0.50975300  |
| C | 3.78262800  | -1.49147000 | -2.35588600 |
| H | 2.87677200  | -0.87048400 | -2.31048200 |
| C | 4.76491600  | 1.20439800  | 1.99563100  |
| H | 3.80453400  | 1.64225300  | 1.70050200  |
| C | 3.30683200  | -2.97160300 | -2.26818300 |
| H | 4.14941300  | -3.67399200 | -2.35492900 |
| H | 2.79460800  | -3.16931200 | -1.31570700 |
| H | 2.59889200  | -3.19243400 | -3.08236300 |
| C | 4.46655100  | -1.20310500 | -3.72490800 |
| H | 4.78371000  | -0.15100200 | -3.80569000 |
| H | 5.35817600  | -1.83057900 | -3.87264800 |
| H | 3.77008300  | -1.41907600 | -4.55115200 |
| C | 4.53573400  | 0.52112900  | 3.37647600  |
| H | 3.77015700  | -0.26566600 | 3.30648000  |
| H | 5.45884000  | 0.06348500  | 3.76348300  |
| H | 4.19600800  | 1.26500900  | 4.11521800  |

|                |            |            |            |
|----------------|------------|------------|------------|
| C              | 5.78804400 | 2.37257700 | 2.10132200 |
| H              | 6.77633100 | 2.02425500 | 2.43725100 |
| H              | 5.92410900 | 2.87617400 | 1.13042100 |
| H              | 5.43509500 | 3.12018600 | 2.82998100 |
| Frequencies -- | -1050.6386 | 8.1836     | 13.6138    |
| Frequencies -- | 20.7812    | 22.0081    | 24.2127    |
| Frequencies -- | 28.3748    | 29.6183    | 33.8299    |
| Frequencies -- | 35.4036    | 37.0563    | 39.2141    |
| Frequencies -- | 41.2067    | 48.4974    | 53.7769    |
| Frequencies -- | 60.1031    | 61.0052    | 67.5785    |
| Frequencies -- | 94.4020    | 103.2574   | 108.3279   |
| Frequencies -- | 112.3153   | 121.2500   | 123.0284   |
| Frequencies -- | 125.1394   | 126.2858   | 136.5948   |
| Frequencies -- | 139.4240   | 141.4082   | 147.2501   |
| Frequencies -- | 153.5679   | 156.1135   | 159.7829   |
| Frequencies -- | 162.2088   | 170.4120   | 173.8604   |
| Frequencies -- | 180.7288   | 210.6890   | 215.2340   |
| Frequencies -- | 217.9750   | 221.0422   | 222.0679   |
| Frequencies -- | 222.9067   | 224.6405   | 231.6969   |
| Frequencies -- | 238.4021   | 241.9441   | 254.6422   |
| Frequencies -- | 263.2159   | 264.3037   | 264.6173   |
| Frequencies -- | 265.1388   | 268.2842   | 274.9123   |
| Frequencies -- | 275.2902   | 277.8832   | 288.2764   |
| Frequencies -- | 298.5261   | 302.4578   | 304.9848   |
| Frequencies -- | 311.7596   | 312.4061   | 313.9772   |
| Frequencies -- | 326.2308   | 327.7231   | 337.5977   |
| Frequencies -- | 349.0374   | 362.1082   | 375.0065   |
| Frequencies -- | 377.6327   | 378.1831   | 381.2114   |
| Frequencies -- | 381.6469   | 395.8762   | 422.4374   |
| Frequencies -- | 429.4163   | 430.7754   | 432.1288   |
| Frequencies -- | 433.1461   | 435.3131   | 450.8572   |
| Frequencies -- | 456.5962   | 463.7738   | 482.7352   |
| Frequencies -- | 535.2601   | 536.1486   | 538.4589   |
| Frequencies -- | 541.2483   | 544.3237   | 553.7070   |
| Frequencies -- | 567.9988   | 570.4327   | 570.9694   |
| Frequencies -- | 596.4490   | 599.7927   | 606.4362   |
| Frequencies -- | 614.8390   | 627.0763   | 635.1738   |
| Frequencies -- | 635.8774   | 637.9763   | 642.2739   |
| Frequencies -- | 656.1034   | 673.9737   | 708.1795   |
| Frequencies -- | 718.6531   | 722.9093   | 726.2847   |
| Frequencies -- | 735.5302   | 747.6765   | 749.5435   |
| Frequencies -- | 761.3044   | 761.8919   | 772.5897   |
| Frequencies -- | 788.0178   | 793.6057   | 797.0371   |
| Frequencies -- | 814.7895   | 817.4300   | 838.2466   |
| Frequencies -- | 841.1921   | 848.7149   | 866.0378   |
| Frequencies -- | 871.0569   | 878.1205   | 880.2805   |
| Frequencies -- | 889.6819   | 896.5043   | 902.2057   |
| Frequencies -- | 912.5489   | 920.5799   | 926.1056   |
| Frequencies -- | 930.3018   | 933.7643   | 938.9320   |
| Frequencies -- | 940.8470   | 963.0341   | 963.9278   |
| Frequencies -- | 993.6421   | 1001.4266  | 1018.7842  |
| Frequencies -- | 1024.2263  | 1028.9900  | 1034.3839  |
| Frequencies -- | 1038.7983  | 1050.4120  | 1052.0977  |
| Frequencies -- | 1054.0355  | 1055.8341  | 1071.1489  |
| Frequencies -- | 1087.0500  | 1090.3142  | 1093.7978  |
| Frequencies -- | 1115.5414  | 1115.9986  | 1117.5834  |
| Frequencies -- | 1126.7540  | 1165.7948  | 1184.7184  |
| Frequencies -- | 1185.1825  | 1204.6834  | 1211.2077  |
| Frequencies -- | 1213.9757  | 1215.8644  | 1250.0511  |
| Frequencies -- | 1253.2969  | 1276.7633  | 1281.9486  |
| Frequencies -- | 1283.6913  | 1308.9754  | 1318.5603  |
| Frequencies -- | 1319.6504  | 1324.0576  | 1324.6896  |

|                |           |           |           |
|----------------|-----------|-----------|-----------|
| Frequencies -- | 1325.9421 | 1328.3047 | 1338.4123 |
| Frequencies -- | 1340.1008 | 1344.4452 | 1349.6112 |
| Frequencies -- | 1379.8828 | 1390.3472 | 1392.7030 |
| Frequencies -- | 1401.4135 | 1401.6220 | 1411.6837 |
| Frequencies -- | 1419.9126 | 1420.7301 | 1421.9641 |
| Frequencies -- | 1422.8919 | 1435.1009 | 1438.5663 |
| Frequencies -- | 1452.6632 | 1458.8752 | 1467.9216 |
| Frequencies -- | 1468.7322 | 1471.4551 | 1473.6284 |
| Frequencies -- | 1485.0312 | 1487.5831 | 1488.8013 |
| Frequencies -- | 1489.7221 | 1500.1871 | 1500.6883 |
| Frequencies -- | 1505.2147 | 1509.1440 | 1519.4683 |
| Frequencies -- | 1593.7565 | 1595.9891 | 1596.2910 |
| Frequencies -- | 1597.5069 | 1603.7423 | 1617.9302 |
| Frequencies -- | 1619.5273 | 1622.5986 | 1831.3783 |
| Frequencies -- | 2968.9350 | 3004.9105 | 3007.0766 |
| Frequencies -- | 3014.4481 | 3018.0055 | 3038.3073 |
| Frequencies -- | 3060.3928 | 3073.8085 | 3100.0137 |
| Frequencies -- | 3105.0221 | 3106.3199 | 3111.0993 |
| Frequencies -- | 3115.2197 | 3124.2135 | 3125.8600 |
| Frequencies -- | 3134.9435 | 3137.1386 | 3142.9690 |
| Frequencies -- | 3166.8198 | 3185.3462 | 3186.7637 |
| Frequencies -- | 3200.2809 | 3235.5015 | 3240.2485 |
| Frequencies -- | 3254.6662 | 3261.5947 | 3279.1358 |

**Catalyst 4:**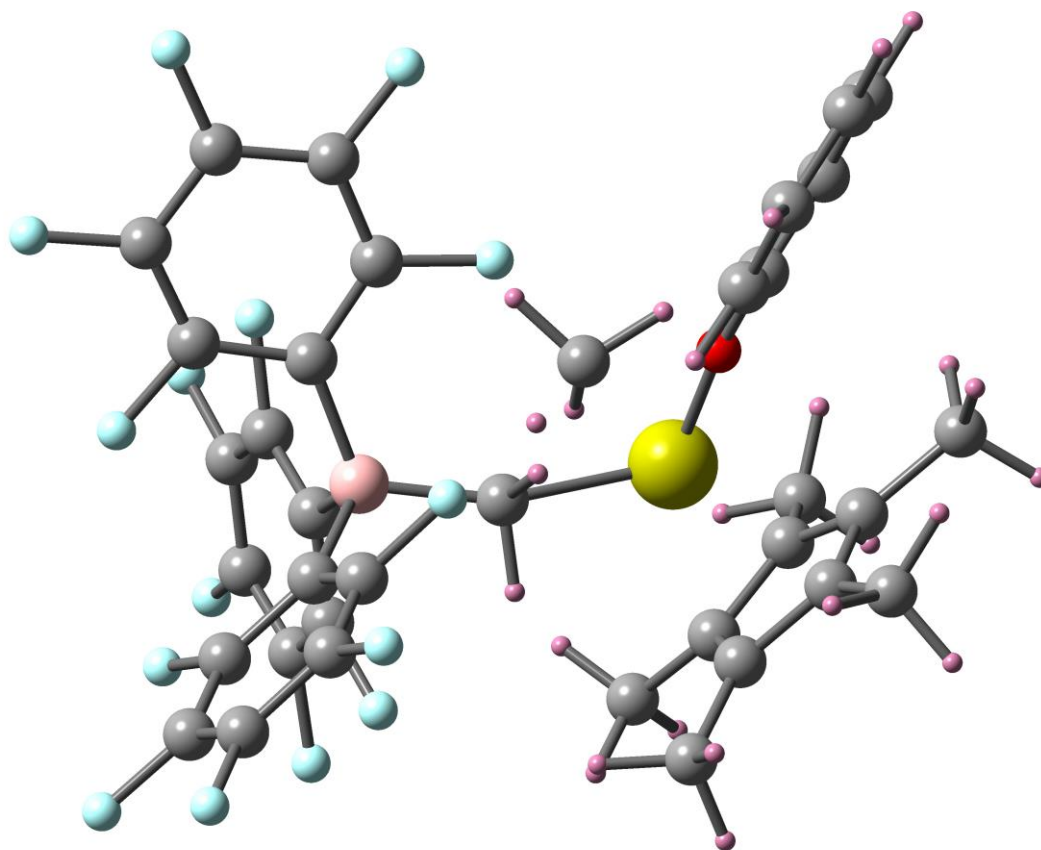

| <b>vacuum</b> | <b>toluene-like solvent</b> | <b>D3 dispersion</b> |
|---------------|-----------------------------|----------------------|
| -3042.3570666 | -3042.3694231               | -0.55148438          |

Imaginary frequency corresponding to vibration along the reaction coordinate:  $-984 \text{ cm}^{-1}$ .

|    |            |             |             |
|----|------------|-------------|-------------|
| Ti | 2.38193300 | -0.99436500 | 0.01488000  |
| C  | 1.60608400 | -1.27239900 | -2.15778700 |
| H  | 1.04007000 | -0.56988200 | -2.78581200 |
| H  | 2.66219700 | -1.14995700 | -2.44295200 |
| H  | 1.28416400 | -2.29571000 | -2.37316400 |
| O  | 3.33479200 | 0.49101100  | -0.19480500 |
| C  | 4.14347600 | 1.61666100  | -0.19505800 |
| C  | 3.97302900 | 2.59777900  | 0.81196700  |
| C  | 5.10912400 | 1.78770700  | -1.21590200 |
| C  | 4.78474400 | 3.74924600  | 0.79703100  |
| C  | 5.91193200 | 2.94637600  | -1.22019700 |
| C  | 5.75658900 | 3.92694400  | -0.21421800 |
| H  | 4.64962800 | 4.51033300  | 1.56831400  |
| H  | 6.65104300 | 3.08474600  | -2.01220100 |
| H  | 6.37799300 | 4.82415300  | -0.22401200 |
| C  | 2.49356000 | -2.63297500 | 1.82582800  |
| C  | 2.19882100 | -3.40158300 | 0.64740600  |
| C  | 3.78843200 | -1.99150300 | 1.63663600  |
| C  | 3.30544100 | -3.24027100 | -0.27889700 |

|   |             |             |             |
|---|-------------|-------------|-------------|
| C | 4.30111200  | -2.39899800 | 0.34878500  |
| F | -1.73838200 | 5.43277500  | -2.75924600 |
| C | -1.58946900 | 4.19433000  | -2.15111000 |
| C | -2.70739500 | 3.49092900  | -1.67109700 |
| C | -0.32043700 | 3.61332900  | -2.01039400 |
| C | -2.52438200 | 2.23866200  | -1.05737000 |
| F | -3.97857400 | 4.03495200  | -1.81503400 |
| C | -0.19837000 | 2.35462400  | -1.38852000 |
| F | 0.80450500  | 4.27899700  | -2.49013000 |
| C | -1.27166500 | 1.60327200  | -0.86967600 |
| F | -3.69557900 | 1.59124500  | -0.64813900 |
| F | 1.11196800  | 1.85154400  | -1.33433400 |
| B | -1.17438500 | 0.14664600  | -0.05826900 |
| C | -1.91827300 | 0.46338900  | 1.42531300  |
| C | -1.87077700 | -1.10911200 | -0.91288000 |
| C | 0.38231400  | -0.40219900 | 0.32172300  |
| C | -3.19194000 | 0.01139000  | 1.85094100  |
| C | -1.29477700 | 1.30769000  | 2.37601300  |
| C | -2.19850700 | -1.08192300 | -2.28879800 |
| C | -2.11289100 | -2.37227900 | -0.32187600 |
| H | 0.92748000  | 0.43297300  | 0.81697300  |
| H | 0.20936600  | -1.23406900 | 1.02358400  |
| H | 0.93576300  | -0.86289800 | -1.08301700 |
| C | -3.77005900 | 0.31862000  | 3.10034300  |
| F | -3.99174800 | -0.77413700 | 1.01885700  |
| C | -1.82681300 | 1.64715200  | 3.63388400  |
| F | -0.05010900 | 1.90857300  | 2.08515500  |
| C | -2.76453100 | -2.16313900 | -2.99810200 |
| F | -1.94405700 | 0.05491600  | -3.06953000 |
| C | -2.66958400 | -3.48253800 | -0.97907500 |
| F | -1.78518800 | -2.58309100 | 1.03025100  |
| C | -3.08073400 | 1.13862800  | 4.00782400  |
| F | -5.02292700 | -0.17785900 | 3.44101300  |
| F | -1.12535400 | 2.47819400  | 4.50387000  |
| C | -3.01253900 | -3.37624900 | -2.33752800 |
| F | -3.06186000 | -2.04312200 | -4.35097700 |
| F | -2.87369300 | -4.68244300 | -0.30335600 |
| F | -3.63005700 | 1.44896500  | 5.24377500  |
| F | -3.55984500 | -4.45566200 | -3.01601100 |
| C | 3.48873900  | -4.02025500 | -1.56088200 |
| H | 4.10191100  | -4.91720300 | -1.36726100 |
| H | 2.53331500  | -4.36566900 | -1.97537800 |
| H | 4.00433600  | -3.44443300 | -2.34228700 |
| C | 1.01746000  | -4.32355800 | 0.44517700  |
| H | 0.36525200  | -4.00638700 | -0.38012500 |
| H | 1.36422500  | -5.34338200 | 0.21472800  |
| H | 0.39322200  | -4.37927300 | 1.34380900  |
| C | 1.67741300  | -2.59998300 | 3.10027200  |
| H | 0.60693700  | -2.43174600 | 2.92254600  |
| H | 1.76975000  | -3.56583600 | 3.62499000  |
| H | 2.02480100  | -1.82119300 | 3.79146000  |
| C | 4.53479100  | -1.19286100 | 2.68326800  |
| H | 3.87884100  | -0.50821000 | 3.23977900  |
| H | 4.99094200  | -1.87426800 | 3.42223500  |
| H | 5.34433600  | -0.59419700 | 2.24733000  |
| C | 5.67809500  | -2.10063800 | -0.19939000 |
| H | 6.04136300  | -1.10526800 | 0.08619000  |



|                |            |             |             |
|----------------|------------|-------------|-------------|
| H              | 6.40091700 | -2.83615900 | 0.19504300  |
| H              | 5.71449200 | -2.17154600 | -1.29516300 |
| H              | 3.20682000 | 2.46569500  | 1.57630100  |
| H              | 5.21190900 | 1.03387800  | -1.99689000 |
| Frequencies -- | -983.7699  | 11.5697     | 14.4898     |
| Frequencies -- | 18.4619    | 25.7170     | 27.2205     |
| Frequencies -- | 29.0634    | 30.9317     | 32.5705     |
| Frequencies -- | 38.3377    | 42.0190     | 48.6101     |
| Frequencies -- | 51.0677    | 63.8599     | 70.3619     |
| Frequencies -- | 76.9623    | 94.6402     | 96.5946     |
| Frequencies -- | 103.0776   | 109.8570    | 113.2895    |
| Frequencies -- | 115.9298   | 119.7445    | 121.1482    |
| Frequencies -- | 125.0196   | 128.1082    | 131.1877    |
| Frequencies -- | 139.1655   | 142.5963    | 143.4527    |
| Frequencies -- | 144.6747   | 150.1173    | 155.3103    |
| Frequencies -- | 156.3548   | 160.8065    | 161.8838    |
| Frequencies -- | 162.1753   | 166.5124    | 176.4498    |
| Frequencies -- | 191.0406   | 202.3978    | 212.5908    |
| Frequencies -- | 215.6117   | 220.9985    | 224.3707    |
| Frequencies -- | 226.9934   | 251.4050    | 264.3586    |
| Frequencies -- | 264.5672   | 265.2536    | 274.8565    |
| Frequencies -- | 276.3646   | 277.4327    | 283.0893    |
| Frequencies -- | 287.7715   | 294.9386    | 297.7034    |
| Frequencies -- | 303.2419   | 304.5514    | 305.4953    |
| Frequencies -- | 308.6175   | 321.6859    | 326.8117    |
| Frequencies -- | 328.0322   | 334.8478    | 350.5895    |
| Frequencies -- | 361.9166   | 372.3417    | 377.3080    |
| Frequencies -- | 378.4525   | 379.9074    | 381.6666    |
| Frequencies -- | 395.3245   | 395.4456    | 405.9373    |
| Frequencies -- | 408.3287   | 431.3220    | 432.2168    |
| Frequencies -- | 434.2384   | 439.8077    | 450.3817    |
| Frequencies -- | 456.8430   | 464.1501    | 480.2614    |
| Frequencies -- | 509.1985   | 532.3355    | 535.7862    |
| Frequencies -- | 537.0345   | 539.1779    | 544.7484    |
| Frequencies -- | 554.2932   | 559.8311    | 576.3345    |
| Frequencies -- | 581.3213   | 593.3901    | 600.6373    |
| Frequencies -- | 602.8878   | 614.7108    | 615.7035    |
| Frequencies -- | 634.8113   | 636.6192    | 638.6201    |
| Frequencies -- | 643.2689   | 655.1567    | 664.2546    |
| Frequencies -- | 672.1969   | 687.2634    | 696.0628    |
| Frequencies -- | 718.5104   | 722.5033    | 733.3135    |
| Frequencies -- | 746.1755   | 748.4372    | 758.9773    |
| Frequencies -- | 762.4843   | 770.6167    | 803.7424    |
| Frequencies -- | 806.0155   | 831.1851    | 842.7513    |
| Frequencies -- | 871.1020   | 882.7344    | 887.4107    |
| Frequencies -- | 903.7638   | 912.8196    | 914.0819    |
| Frequencies -- | 919.9031   | 928.0386    | 970.4690    |
| Frequencies -- | 972.5833   | 974.5253    | 998.1603    |
| Frequencies -- | 1008.3802  | 1011.2031   | 1018.7669   |
| Frequencies -- | 1028.2655  | 1030.7014   | 1039.3720   |
| Frequencies -- | 1042.0149  | 1043.5309   | 1045.7105   |
| Frequencies -- | 1046.4569  | 1050.4833   | 1053.6585   |
| Frequencies -- | 1055.8271  | 1057.5184   | 1088.1379   |
| Frequencies -- | 1089.3897  | 1090.5815   | 1095.9817   |
| Frequencies -- | 1125.1209  | 1171.0385   | 1175.2080   |
| Frequencies -- | 1183.0026  | 1189.8929   | 1209.3484   |
| Frequencies -- | 1213.3294  | 1216.0966   | 1243.1617   |
| Frequencies -- | 1263.8838  | 1301.6534   | 1315.7526   |
| Frequencies -- | 1319.5038  | 1324.5038   | 1326.0606   |
| Frequencies -- | 1336.4034  | 1342.9169   | 1349.8048   |
| Frequencies -- | 1351.7474  | 1376.5392   | 1410.1315   |
| Frequencies -- | 1410.7176  | 1416.0100   | 1419.2634   |

|                |           |           |           |
|----------------|-----------|-----------|-----------|
| Frequencies -- | 1422.2172 | 1424.5952 | 1425.5633 |
| Frequencies -- | 1430.3479 | 1432.0235 | 1436.6108 |
| Frequencies -- | 1450.3955 | 1453.1834 | 1455.6304 |
| Frequencies -- | 1462.7786 | 1466.4275 | 1467.0324 |
| Frequencies -- | 1469.0499 | 1471.2511 | 1483.4008 |
| Frequencies -- | 1483.7599 | 1490.1032 | 1491.9057 |
| Frequencies -- | 1494.2883 | 1501.2396 | 1502.7447 |
| Frequencies -- | 1505.9807 | 1506.9610 | 1511.9588 |
| Frequencies -- | 1516.6353 | 1522.6376 | 1593.6799 |
| Frequencies -- | 1595.9209 | 1598.4946 | 1598.8541 |
| Frequencies -- | 1608.5896 | 1616.8413 | 1619.2777 |
| Frequencies -- | 1622.3780 | 1815.3006 | 2927.6620 |
| Frequencies -- | 3009.7024 | 3011.6957 | 3013.9182 |
| Frequencies -- | 3018.8256 | 3027.3822 | 3030.4964 |
| Frequencies -- | 3096.8411 | 3099.3581 | 3099.5769 |
| Frequencies -- | 3101.8863 | 3108.6244 | 3109.0875 |
| Frequencies -- | 3127.7477 | 3139.4161 | 3142.4600 |
| Frequencies -- | 3144.0137 | 3147.4121 | 3161.7704 |
| Frequencies -- | 3166.7336 | 3174.7339 | 3187.3309 |
| Frequencies -- | 3191.0938 | 3199.1584 | 3207.7447 |

**Catalyst 5:**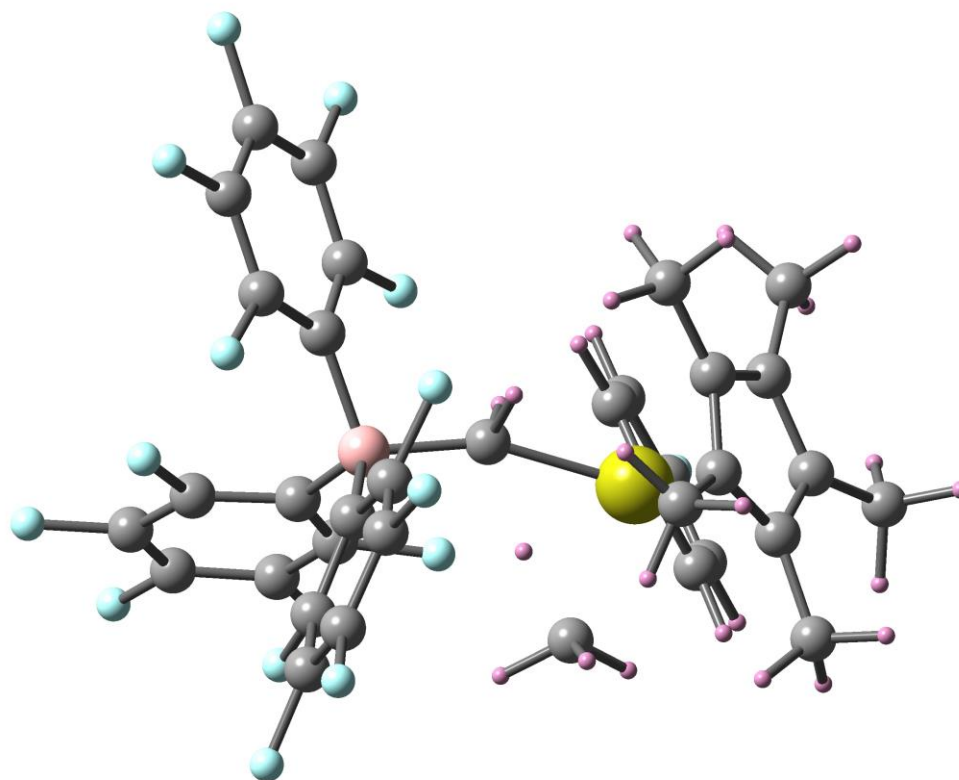

| <b>vacuum</b> | <b>toluene-like solvent</b> | <b>D3 dispersion</b> |
|---------------|-----------------------------|----------------------|
| -3141.5835662 | -3141.5876831               | -0.55143640          |

Imaginary frequency corresponding to vibration along the reaction coordinate:  $-1062\text{ cm}^{-1}$ .

|    |             |             |             |
|----|-------------|-------------|-------------|
| Ti | 1.97361800  | -1.56415900 | -0.01980800 |
| C  | 1.14828300  | -1.66874300 | -2.18604500 |
| H  | 0.68134800  | -0.88974600 | -2.80564200 |
| H  | 2.20122800  | -1.71521700 | -2.50296900 |
| H  | 0.65845600  | -2.62714900 | -2.38126700 |
| O  | 3.23288500  | -0.31961200 | -0.22097600 |
| C  | 4.21492000  | 0.65388300  | -0.18292000 |
| C  | 4.18943900  | 1.63537400  | 0.83978100  |
| C  | 5.21844000  | 0.67761100  | -1.18241500 |
| C  | 5.17740400  | 2.63739700  | 0.87013900  |
| C  | 6.20660300  | 1.68050000  | -1.15761700 |
| C  | 6.16760200  | 2.63729500  | -0.12822100 |
| H  | 5.17683200  | 3.40814600  | 1.64028500  |
| H  | 6.98533700  | 1.72728100  | -1.91828600 |
| C  | 1.55823200  | -3.30471100 | 1.66896900  |
| C  | 1.34433800  | -3.95846200 | 0.40865400  |
| C  | 2.93961500  | -2.83790700 | 1.70625200  |
| C  | 2.59091700  | -3.90605200 | -0.34049400 |
| C  | 3.58553400  | -3.25781200 | 0.48357100  |
| F  | -0.69577300 | 5.60476700  | -2.78558900 |
| C  | -0.80846400 | 4.36495700  | -2.17318400 |
| C  | -2.04147800 | 3.92811200  | -1.65917200 |

|   |             |             |             |
|---|-------------|-------------|-------------|
| C | 0.30333500  | 3.51664800  | -2.06193100 |
| C | -2.12489400 | 2.66735400  | -1.04133100 |
| F | -3.16332700 | 4.74032500  | -1.77432500 |
| C | 0.15899500  | 2.26320000  | -1.43441600 |
| F | 1.53503700  | 3.91408300  | -2.57515600 |
| C | -1.03988400 | 1.76988900  | -0.88260400 |
| F | -3.39862700 | 2.29586600  | -0.59709500 |
| F | 1.32677400  | 1.48109100  | -1.40938300 |
| B | -1.24724300 | 0.32927900  | -0.06606200 |
| C | -1.87264100 | 0.79593100  | 1.43137100  |
| C | -2.21110800 | -0.75112400 | -0.89693000 |
| C | 0.16202600  | -0.53858900 | 0.28666500  |
| C | -3.20279600 | 0.62178000  | 1.88696000  |
| C | -1.06271000 | 1.48635900  | 2.36520700  |
| C | -2.57098700 | -0.65417900 | -2.26132500 |
| C | -2.68236900 | -1.94087200 | -0.29372500 |
| H | 0.88505000  | 0.16339300  | 0.75784900  |
| H | -0.16585800 | -1.31356500 | 0.99884200  |
| H | 0.58268700  | -1.10621400 | -1.09665700 |
| C | -3.67307300 | 1.04013000  | 3.14916400  |
| F | -4.16905900 | 0.02638400  | 1.07408800  |
| C | -1.48067800 | 1.92646200  | 3.63479100  |
| F | 0.27487700  | 1.81024400  | 2.04272400  |
| C | -3.36350100 | -1.59941200 | -2.94774200 |
| F | -2.11981100 | 0.41145600  | -3.05267800 |
| C | -3.46915700 | -2.91649500 | -0.92729100 |
| F | -2.35766800 | -2.21374800 | 1.04987700  |
| C | -2.80482700 | 1.69300200  | 4.03871600  |
| F | -4.99392100 | 0.81855700  | 3.52024200  |
| F | -0.59877800 | 2.58662600  | 4.48658500  |
| C | -3.82649600 | -2.74074200 | -2.27480400 |
| F | -3.67467400 | -1.41900900 | -4.29047800 |
| F | -3.88218000 | -4.05552100 | -0.24148300 |
| F | -3.24696200 | 2.10776600  | 5.28665100  |
| F | -4.59799400 | -3.68854900 | -2.93137900 |
| C | 2.86424800  | -4.62148400 | -1.64437000 |
| H | 3.26617100  | -5.62891200 | -1.43932600 |
| H | 1.95765100  | -4.75556800 | -2.24781800 |
| H | 3.60639600  | -4.10030300 | -2.26573700 |
| C | 0.10527600  | -4.71041700 | -0.01939800 |
| H | -0.14559200 | -4.55232000 | -1.07791200 |
| H | 0.27055000  | -5.79435900 | 0.10765300  |
| H | -0.77315800 | -4.44417100 | 0.57760400  |
| C | 0.59425800  | -3.22979700 | 2.83207600  |
| H | -0.45026100 | -3.34911400 | 2.52381000  |
| H | 0.82028000  | -4.03817500 | 3.54867000  |
| H | 0.67341100  | -2.28285300 | 3.38550100  |
| C | 3.61710500  | -2.20569300 | 2.90270900  |
| H | 2.94191900  | -1.54878500 | 3.46941200  |
| H | 3.95958300  | -2.99018300 | 3.59990400  |
| H | 4.49788500  | -1.61509200 | 2.61881700  |
| C | 5.05777700  | -3.13811200 | 0.16425500  |
| H | 5.52425600  | -2.27248700 | 0.65079900  |
| H | 5.58764700  | -4.03862700 | 0.52110700  |
| H | 5.24860200  | -3.05994200 | -0.91493000 |
| H | 3.39704200  | 1.62424600  | 1.58770900  |
| H | 5.21303400  | -0.07118000 | -1.97402600 |

| F              | 7.15512400 | 3.63535300 | -0.09922200 |
|----------------|------------|------------|-------------|
| Frequencies -- | -1062.2773 | -2.8552    | 14.8392     |
| Frequencies -- | 20.6407    | 22.7626    | 27.9776     |
| Frequencies -- | 29.0303    | 31.5768    | 35.7732     |
| Frequencies -- | 38.1734    | 40.2395    | 46.7229     |
| Frequencies -- | 49.6103    | 57.5199    | 68.9312     |
| Frequencies -- | 94.2320    | 97.9622    | 102.5197    |
| Frequencies -- | 109.7922   | 110.8104   | 113.4371    |
| Frequencies -- | 114.7219   | 116.8288   | 119.3214    |
| Frequencies -- | 122.6071   | 126.5137   | 130.6337    |
| Frequencies -- | 135.8934   | 138.3081   | 143.1707    |
| Frequencies -- | 144.3638   | 149.8678   | 154.7678    |
| Frequencies -- | 156.3055   | 160.5255   | 161.8994    |
| Frequencies -- | 164.3627   | 166.8889   | 172.4646    |
| Frequencies -- | 188.5667   | 202.6037   | 211.9188    |
| Frequencies -- | 217.8461   | 221.2229   | 224.1927    |
| Frequencies -- | 238.0300   | 241.8948   | 263.7740    |
| Frequencies -- | 264.3488   | 264.7137   | 265.9050    |
| Frequencies -- | 274.2587   | 275.6208   | 278.5487    |
| Frequencies -- | 284.3762   | 287.9483   | 293.0034    |
| Frequencies -- | 295.5581   | 302.2377   | 302.8797    |
| Frequencies -- | 304.1349   | 306.7248   | 325.2541    |
| Frequencies -- | 326.4664   | 332.8593   | 344.3829    |
| Frequencies -- | 356.6517   | 361.2883   | 368.4348    |
| Frequencies -- | 373.3484   | 377.5597   | 378.6737    |
| Frequencies -- | 381.2763   | 392.5261   | 394.0203    |
| Frequencies -- | 404.6517   | 409.0387   | 417.6878    |
| Frequencies -- | 431.3855   | 432.2118   | 433.7444    |
| Frequencies -- | 449.3251   | 454.9556   | 456.4861    |
| Frequencies -- | 464.0373   | 481.0656   | 512.3245    |
| Frequencies -- | 531.7984   | 535.0666   | 537.0444    |
| Frequencies -- | 537.4784   | 544.7841   | 554.2441    |
| Frequencies -- | 555.2881   | 568.8539   | 576.5770    |
| Frequencies -- | 582.7011   | 595.2547   | 601.3223    |
| Frequencies -- | 607.1379   | 612.8956   | 631.7848    |
| Frequencies -- | 634.9221   | 636.3487   | 638.4426    |
| Frequencies -- | 643.7312   | 655.3596   | 672.0059    |
| Frequencies -- | 701.6719   | 704.6164   | 718.8547    |
| Frequencies -- | 723.6810   | 734.2071   | 746.7126    |
| Frequencies -- | 749.0084   | 762.2414   | 771.2080    |
| Frequencies -- | 791.8203   | 800.6364   | 801.9567    |
| Frequencies -- | 806.2673   | 831.0818   | 842.4982    |
| Frequencies -- | 871.0427   | 877.9397   | 886.2346    |
| Frequencies -- | 903.7194   | 912.7278   | 918.9501    |
| Frequencies -- | 923.7315   | 945.9300   | 959.4469    |
| Frequencies -- | 967.6367   | 969.6277   | 1012.8382   |
| Frequencies -- | 1013.9005  | 1018.7215  | 1029.2626   |
| Frequencies -- | 1039.2024  | 1041.0427  | 1044.1093   |
| Frequencies -- | 1045.3612  | 1046.7576  | 1048.2730   |
| Frequencies -- | 1050.7445  | 1054.5541  | 1057.4133   |
| Frequencies -- | 1086.0770  | 1088.3751  | 1097.5120   |
| Frequencies -- | 1113.4874  | 1124.2458  | 1169.1086   |
| Frequencies -- | 1171.1367  | 1174.1920  | 1203.5494   |
| Frequencies -- | 1209.7857  | 1213.4802  | 1216.4399   |
| Frequencies -- | 1256.3258  | 1268.1421  | 1297.9672   |
| Frequencies -- | 1305.3025  | 1316.2311  | 1319.6781   |
| Frequencies -- | 1326.7347  | 1337.5477  | 1343.8556   |
| Frequencies -- | 1348.2685  | 1351.2637  | 1360.3512   |
| Frequencies -- | 1407.6322  | 1411.6368  | 1413.4463   |
| Frequencies -- | 1419.7171  | 1421.6424  | 1422.7746   |
| Frequencies -- | 1423.5083  | 1426.5826  | 1427.2934   |
| Frequencies -- | 1428.6822  | 1435.0709  | 1450.6578   |

|                |           |           |           |
|----------------|-----------|-----------|-----------|
| Frequencies -- | 1452.1606 | 1464.1917 | 1467.4962 |
| Frequencies -- | 1469.1400 | 1471.6316 | 1472.1030 |
| Frequencies -- | 1481.6406 | 1485.2551 | 1490.6973 |
| Frequencies -- | 1494.1867 | 1495.3379 | 1498.7593 |
| Frequencies -- | 1499.1391 | 1505.3644 | 1507.7363 |
| Frequencies -- | 1510.2254 | 1513.7489 | 1525.6931 |
| Frequencies -- | 1593.8814 | 1595.9743 | 1598.7194 |
| Frequencies -- | 1599.6977 | 1616.1198 | 1617.5803 |
| Frequencies -- | 1620.5367 | 1622.8091 | 1830.5178 |
| Frequencies -- | 2936.7918 | 3008.9551 | 3010.5056 |
| Frequencies -- | 3012.0283 | 3014.0037 | 3015.1768 |
| Frequencies -- | 3032.3695 | 3088.2584 | 3096.3158 |
| Frequencies -- | 3096.8100 | 3098.4350 | 3100.1340 |
| Frequencies -- | 3101.7309 | 3128.7718 | 3136.7511 |
| Frequencies -- | 3142.1922 | 3147.4558 | 3156.9259 |
| Frequencies -- | 3168.2547 | 3193.4623 | 3197.3828 |
| Frequencies -- | 3200.1458 | 3216.4767 | 3220.1526 |

**Catalyst 6:**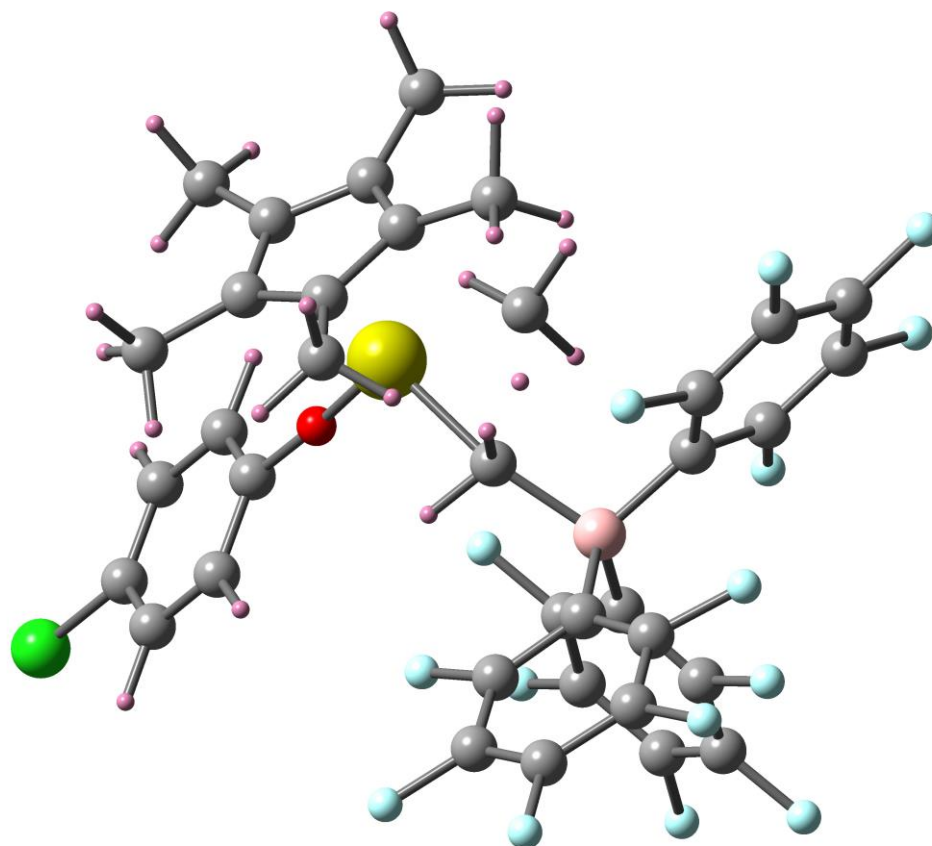

| <b>vacuum</b> | <b>toluene-like solvent</b> | <b>D3 dispersion</b> |
|---------------|-----------------------------|----------------------|
| -3056.7114277 | -3056.7241282               | -0.55922899          |

Imaginary frequency corresponding to vibration along the reaction coordinate:  $-900\text{ cm}^{-1}$ .

|    |             |             |             |
|----|-------------|-------------|-------------|
| Ti | -1.57445600 | 1.87057500  | 0.02018800  |
| C  | -0.77644700 | 1.83934100  | -2.16431700 |
| H  | -0.51887000 | 0.97317700  | -2.79007200 |
| H  | -1.81112000 | 2.10849200  | -2.42637800 |
| H  | -0.11040700 | 2.67345500  | -2.40447800 |
| O  | -2.98350000 | 0.79442600  | -0.15819300 |
| C  | -4.12361800 | 0.01286400  | -0.14727900 |
| C  | -4.25262300 | -1.02316200 | 0.81049500  |
| C  | -5.13892800 | 0.23477900  | -1.10893400 |
| C  | -5.40676100 | -1.82929400 | 0.81258500  |
| C  | -6.29122300 | -0.57497800 | -1.10686400 |
| C  | -6.41777500 | -1.59662300 | -0.14316900 |
| H  | -5.50891700 | -2.63360800 | 1.54055300  |
| H  | -7.07395700 | -0.41444100 | -1.84781100 |
| C  | -1.14538100 | 3.43966700  | 1.83875800  |
| C  | -0.55856000 | 4.05043300  | 0.67640100  |
| C  | -2.57874300 | 3.31202600  | 1.60959300  |
| C  | -1.62107600 | 4.29853200  | -0.28110700 |
| C  | -2.87111700 | 3.87395900  | 0.31141400  |

|   |             |             |             |
|---|-------------|-------------|-------------|
| F | 0.05394100  | -5.55995500 | -2.80444800 |
| C | 0.34246800  | -4.35137900 | -2.18738300 |
| C | 1.64072100  | -4.07160800 | -1.72739700 |
| C | -0.65343900 | -3.37856800 | -2.01571000 |
| C | 1.90146200  | -2.83900000 | -1.10227400 |
| F | 2.65122200  | -5.00995800 | -1.90100900 |
| C | -0.33230700 | -2.16024100 | -1.38434000 |
| F | -1.94625300 | -3.61972200 | -2.47299700 |
| C | 0.94021400  | -1.82031300 | -0.88470700 |
| F | 3.22833400  | -2.62980900 | -0.71061100 |
| F | -1.39711100 | -1.24777500 | -1.29617200 |
| B | 1.35765500  | -0.43049700 | -0.05801400 |
| C | 1.93121400  | -1.01045500 | 1.42180300  |
| C | 2.45597500  | 0.50759400  | -0.89575000 |
| C | 0.09668900  | 0.63272800  | 0.32704500  |
| C | 3.27976700  | -1.04883800 | 1.85551800  |
| C | 1.04185400  | -1.59279800 | 2.35752800  |
| C | 2.74694000  | 0.39128000  | -2.27522300 |
| C | 3.13835400  | 1.58734900  | -0.28558300 |
| H | -0.69950300 | 0.04730900  | 0.84136600  |
| H | 0.55884600  | 1.36052600  | 1.01404200  |
| H | -0.27863400 | 1.24372500  | -1.09769900 |
| C | 3.70175700  | -1.56262100 | 3.09966400  |
| F | 4.31243900  | -0.58536200 | 1.03852600  |
| C | 1.40904400  | -2.11917500 | 3.60983900  |
| F | -0.33363100 | -1.70860900 | 2.05379200  |
| C | 3.66484900  | 1.20693100  | -2.97111100 |
| F | 2.09241900  | -0.55850000 | -3.07285200 |
| C | 4.05875900  | 2.43242000  | -0.92877300 |
| F | 2.90634100  | 1.88036000  | 1.07129800  |
| C | 2.75947100  | -2.09682000 | 3.99288000  |
| F | 5.04676100  | -1.55169700 | 3.44919800  |
| F | 0.45153900  | -2.65915600 | 4.46455300  |
| C | 4.33785000  | 2.23420500  | -2.29166300 |
| F | 3.89478700  | 1.01333900  | -4.32846100 |
| F | 4.68423400  | 3.46430900  | -0.23509300 |
| F | 3.15406200  | -2.60215200 | 5.22326600  |
| F | 5.23863400  | 3.05382300  | -2.95597600 |
| C | -1.47266200 | 5.09119500  | -1.55964000 |
| H | -1.69720700 | 6.15398300  | -1.36499800 |
| H | -0.45100100 | 5.04691900  | -1.95770500 |
| H | -2.15696600 | 4.75823000  | -2.35245100 |
| C | 0.88070700  | 4.48700400  | 0.51815000  |
| H | 1.40802000  | 3.93790600  | -0.27297200 |
| H | 0.92968300  | 5.55737000  | 0.26373900  |
| H | 1.44899900  | 4.33797300  | 1.44311600  |
| C | -0.43074700 | 3.11266000  | 3.13238900  |
| H | 0.49951700  | 2.54903400  | 2.97974900  |
| H | -0.16065400 | 4.04669700  | 3.65301500  |
| H | -1.06243200 | 2.53138200  | 3.81629900  |
| C | -3.59289000 | 2.83800400  | 2.62768800  |
| H | -3.25005700 | 1.95561100  | 3.18686800  |
| H | -3.78456100 | 3.63476400  | 3.36705300  |
| H | -4.55462700 | 2.58333800  | 2.16503400  |
| C | -4.24582900 | 4.09158100  | -0.27931100 |
| H | -4.95348800 | 3.29844600  | -0.00716100 |
| H | -4.66403400 | 5.04205800  | 0.09560800  |



|    |             |             |             |
|----|-------------|-------------|-------------|
| H  | -4.22165800 | 4.16350100  | -1.37541600 |
| H  | -3.45443400 | -1.20946100 | 1.52858400  |
| H  | -5.02205800 | 1.01754100  | -1.85796300 |
| C1 | -7.91411500 | -2.63669300 | -0.13546200 |

|                |           |           |           |
|----------------|-----------|-----------|-----------|
| Frequencies -- | -899.8536 | 9.9785    | 13.7233   |
| Frequencies -- | 16.3306   | 21.4222   | 27.5231   |
| Frequencies -- | 28.3740   | 32.0373   | 33.5915   |
| Frequencies -- | 36.7971   | 40.4971   | 47.8332   |
| Frequencies -- | 50.5615   | 54.9780   | 62.0971   |
| Frequencies -- | 68.1757   | 85.3580   | 97.7785   |
| Frequencies -- | 99.6372   | 102.2363  | 111.2963  |
| Frequencies -- | 114.9014  | 117.8057  | 120.4170  |
| Frequencies -- | 125.1494  | 125.8379  | 128.4585  |
| Frequencies -- | 136.0273  | 138.7736  | 140.7698  |
| Frequencies -- | 143.4972  | 145.9272  | 155.3998  |
| Frequencies -- | 156.2675  | 160.1819  | 162.0421  |
| Frequencies -- | 164.7264  | 168.8198  | 173.7235  |
| Frequencies -- | 188.2611  | 201.5930  | 205.2561  |
| Frequencies -- | 215.1928  | 216.9175  | 221.8075  |
| Frequencies -- | 223.8589  | 229.9366  | 250.8057  |
| Frequencies -- | 264.4089  | 264.6022  | 264.8620  |
| Frequencies -- | 269.5499  | 273.4758  | 274.9252  |
| Frequencies -- | 275.7863  | 278.6348  | 281.6699  |
| Frequencies -- | 287.7719  | 292.1295  | 301.7752  |
| Frequencies -- | 302.3838  | 303.5465  | 307.4714  |
| Frequencies -- | 323.0050  | 326.1390  | 330.2917  |
| Frequencies -- | 335.2836  | 344.2710  | 360.5617  |
| Frequencies -- | 371.6345  | 377.2366  | 378.1414  |
| Frequencies -- | 379.5397  | 381.1800  | 391.9951  |
| Frequencies -- | 396.2957  | 405.3800  | 408.7593  |
| Frequencies -- | 430.9788  | 431.8277  | 434.3976  |
| Frequencies -- | 445.5029  | 447.0217  | 456.9700  |
| Frequencies -- | 462.1656  | 465.2677  | 482.9588  |
| Frequencies -- | 490.9093  | 532.2927  | 535.8197  |
| Frequencies -- | 536.6734  | 540.0956  | 544.5123  |
| Frequencies -- | 555.1845  | 561.0480  | 579.5558  |
| Frequencies -- | 581.3442  | 594.4119  | 598.5850  |
| Frequencies -- | 601.3273  | 621.2444  | 628.1210  |
| Frequencies -- | 634.9226  | 636.1484  | 638.5909  |
| Frequencies -- | 642.4565  | 642.8320  | 656.1924  |
| Frequencies -- | 670.1762  | 693.9309  | 702.3936  |
| Frequencies -- | 718.4352  | 722.7998  | 733.3378  |
| Frequencies -- | 746.2975  | 748.7239  | 762.1586  |
| Frequencies -- | 770.7631  | 777.2829  | 784.8495  |
| Frequencies -- | 804.1035  | 805.5763  | 840.8753  |
| Frequencies -- | 871.5654  | 882.9134  | 902.6377  |
| Frequencies -- | 910.5328  | 912.6814  | 922.9065  |
| Frequencies -- | 923.5186  | 929.9089  | 943.9255  |
| Frequencies -- | 968.8402  | 972.3973  | 1006.3614 |
| Frequencies -- | 1013.3335 | 1018.7404 | 1028.2356 |
| Frequencies -- | 1039.3075 | 1039.5640 | 1043.9325 |
| Frequencies -- | 1046.5996 | 1047.6716 | 1050.1466 |
| Frequencies -- | 1052.7542 | 1055.2743 | 1057.6631 |
| Frequencies -- | 1076.3208 | 1087.6482 | 1089.6183 |
| Frequencies -- | 1093.4919 | 1117.4160 | 1125.0130 |
| Frequencies -- | 1170.7895 | 1175.1707 | 1190.6843 |
| Frequencies -- | 1209.5144 | 1213.6498 | 1216.5891 |
| Frequencies -- | 1250.9849 | 1268.4048 | 1300.1986 |
| Frequencies -- | 1308.3646 | 1315.1426 | 1319.4780 |
| Frequencies -- | 1325.5917 | 1336.4305 | 1342.6002 |
| Frequencies -- | 1346.7933 | 1352.0738 | 1354.5505 |

|                |           |           |           |
|----------------|-----------|-----------|-----------|
| Frequencies -- | 1410.0277 | 1410.7875 | 1415.7290 |
| Frequencies -- | 1415.8475 | 1418.9123 | 1422.1455 |
| Frequencies -- | 1424.3944 | 1426.5645 | 1429.3676 |
| Frequencies -- | 1431.9646 | 1435.7252 | 1450.1356 |
| Frequencies -- | 1452.7026 | 1463.1675 | 1467.2161 |
| Frequencies -- | 1468.0065 | 1469.7390 | 1471.8673 |
| Frequencies -- | 1484.8133 | 1485.3920 | 1490.2837 |
| Frequencies -- | 1491.8932 | 1494.3529 | 1500.1992 |
| Frequencies -- | 1502.9857 | 1506.8082 | 1507.2059 |
| Frequencies -- | 1511.6757 | 1515.4088 | 1521.5623 |
| Frequencies -- | 1582.3045 | 1593.4194 | 1595.4170 |
| Frequencies -- | 1598.5705 | 1604.5466 | 1617.0470 |
| Frequencies -- | 1619.2362 | 1622.9451 | 1815.9251 |
| Frequencies -- | 2923.0647 | 3010.5860 | 3012.2141 |
| Frequencies -- | 3013.3216 | 3019.7392 | 3030.8609 |
| Frequencies -- | 3031.1868 | 3090.8153 | 3099.5007 |
| Frequencies -- | 3099.7963 | 3101.9350 | 3109.2587 |
| Frequencies -- | 3115.8453 | 3129.2307 | 3139.0069 |
| Frequencies -- | 3141.5690 | 3144.6789 | 3147.4090 |
| Frequencies -- | 3160.0743 | 3188.5085 | 3195.0570 |
| Frequencies -- | 3197.7917 | 3213.5011 | 3217.6161 |

**Catalyst 7:**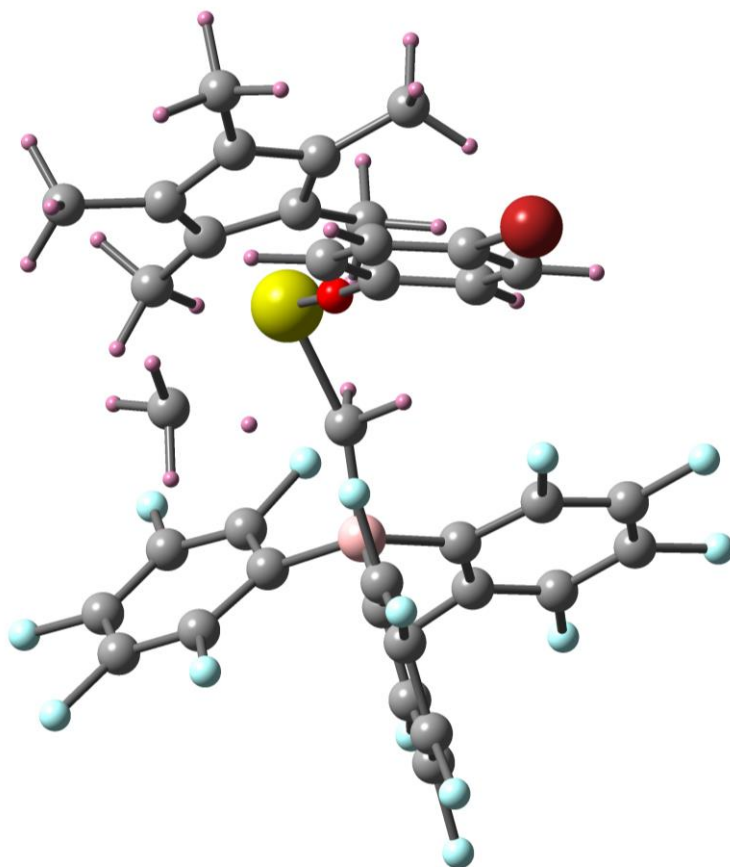

| <b>vacuum</b> | <b>toluene-like solvent</b> | <b>D3 dispersion</b> |
|---------------|-----------------------------|----------------------|
| -3054.9169674 | -3054.9294366               | -0.56005954          |

Imaginary frequency corresponding to vibration along the reaction coordinate:  $-1068 \text{ cm}^{-1}$ .

|    |             |             |             |
|----|-------------|-------------|-------------|
| Ti | -0.96851200 | 2.12057000  | 0.01665500  |
| C  | -0.19379800 | 1.96538800  | -2.16384500 |
| H  | 0.01912100  | 1.07794900  | -2.77696000 |
| H  | -1.19981600 | 2.30191800  | -2.45730700 |
| H  | 0.53869800  | 2.74508500  | -2.39173900 |
| O  | -2.52840100 | 1.27603200  | -0.15859500 |
| C  | -3.76694700 | 0.66350700  | -0.13305000 |
| C  | -4.06469200 | -0.27586000 | 0.88436200  |
| C  | -4.72088500 | 0.95412200  | -1.13759800 |
| C  | -5.32033500 | -0.91296800 | 0.90474800  |
| C  | -5.97645100 | 0.31533100  | -1.11946100 |
| C  | -6.26973000 | -0.60980600 | -0.09482400 |
| H  | -5.54474100 | -1.64012900 | 1.68489500  |
| H  | -6.70745000 | 0.53621800  | -1.89718600 |
| C  | -0.11233500 | 3.66981000  | 1.71728200  |
| C  | 0.34358500  | 4.20731800  | 0.46637800  |
| C  | -1.57024600 | 3.65439100  | 1.69810400  |
| C  | -0.82730500 | 4.53601700  | -0.33267200 |
| C  | -2.00552200 | 4.23659900  | 0.44891500  |
| F  | -0.32538000 | -5.51244300 | -2.77211600 |

|   |             |             |             |
|---|-------------|-------------|-------------|
| C | 0.11383500  | -4.34637000 | -2.16196300 |
| C | 1.43432400  | -4.23505100 | -1.69366600 |
| C | -0.74804900 | -3.25045600 | -2.00614200 |
| C | 1.84994300  | -3.04134100 | -1.07724800 |
| F | 2.31445900  | -5.29899700 | -1.85200200 |
| C | -0.27488000 | -2.07859000 | -1.38232200 |
| F | -2.05787900 | -3.32555700 | -2.47164400 |
| C | 1.02882600  | -1.90377500 | -0.87751800 |
| F | 3.19006600  | -3.00286500 | -0.67681700 |
| F | -1.21247200 | -1.03427800 | -1.30684600 |
| B | 1.61912700  | -0.57149400 | -0.06322500 |
| C | 2.12162400  | -1.19902700 | 1.42161100  |
| C | 2.82145300  | 0.22109200  | -0.90730100 |
| C | 0.49313600  | 0.63511800  | 0.30997200  |
| C | 3.45669500  | -1.38761400 | 1.85649900  |
| C | 1.17065500  | -1.66282800 | 2.36258800  |
| C | 3.12041200  | 0.04452400  | -2.27844900 |
| C | 3.60244300  | 1.23695400  | -0.30730500 |
| H | -0.38525000 | 0.15006500  | 0.78943600  |
| H | 1.02361600  | 1.29359300  | 1.01730900  |
| H | 0.22028700  | 1.28536600  | -1.07389400 |
| C | 3.81697900  | -1.93429700 | 3.10589000  |
| F | 4.53498700  | -1.05406400 | 1.03476400  |
| C | 1.47507300  | -2.21557500 | 3.62036400  |
| F | -0.20828500 | -1.61708800 | 2.05906300  |
| C | 4.12719800  | 0.74810100  | -2.97425500 |
| F | 2.38587800  | -0.85188200 | -3.06747400 |
| C | 4.61320500  | 1.97029100  | -0.94982100 |
| F | 3.38231200  | 1.57691400  | 1.04152400  |
| C | 2.81933400  | -2.34701700 | 4.00347400  |
| F | 5.15439000  | -2.07588800 | 3.45637400  |
| F | 0.46194400  | -2.63066900 | 4.48073400  |
| C | 4.89015200  | 1.71673100  | -2.30378300 |
| F | 4.35752800  | 0.50352400  | -4.32317400 |
| F | 5.32833500  | 2.94956900  | -0.26592800 |
| F | 3.15347800  | -2.88285500 | 5.23892300  |
| F | 5.87769900  | 2.42877700  | -2.96894000 |
| C | -0.80585400 | 5.29152800  | -1.64198000 |
| H | -0.88316700 | 6.37520600  | -1.44663900 |
| H | 0.12560900  | 5.13279000  | -2.19986700 |
| H | -1.64282200 | 5.02331700  | -2.30183900 |
| C | 1.77106300  | 4.52379200  | 0.08258400  |
| H | 2.07161000  | 4.06611800  | -0.87076900 |
| H | 1.89194400  | 5.61363600  | -0.03404400 |
| H | 2.48487000  | 4.19393500  | 0.84409700  |
| C | 0.73684700  | 3.31097600  | 2.91660500  |
| H | 1.75229300  | 3.00271500  | 2.64247100  |
| H | 0.82900900  | 4.19085500  | 3.57660900  |
| H | 0.29257800  | 2.50578200  | 3.51864800  |
| C | -2.45711100 | 3.28365300  | 2.86702200  |
| H | -2.07145800 | 2.42346700  | 3.43291700  |
| H | -2.52041500 | 4.12907600  | 3.57410300  |
| H | -3.48094000 | 3.04430700  | 2.55197100  |
| C | -3.43086700 | 4.57309200  | 0.07447000  |
| H | -4.15122300 | 3.83455000  | 0.44862400  |
| H | -3.70706600 | 5.54818700  | 0.51232200  |
| H | -3.56934300 | 4.65801500  | -1.01190900 |

|    |             |             |             |
|----|-------------|-------------|-------------|
| H  | -3.31802100 | -0.51902100 | 1.64036900  |
| H  | -4.47973400 | 1.66080900  | -1.93161200 |
| Br | -8.02153000 | -1.49524300 | -0.06472800 |

|             |    |            |           |           |
|-------------|----|------------|-----------|-----------|
| Frequencies | -- | -1068.2338 | 6.5137    | 11.3833   |
| Frequencies | -- | 18.0512    | 20.6984   | 23.5537   |
| Frequencies | -- | 28.3207    | 29.4352   | 32.5881   |
| Frequencies | -- | 36.8055    | 41.7561   | 46.9142   |
| Frequencies | -- | 48.4832    | 53.7581   | 61.8256   |
| Frequencies | -- | 65.9921    | 80.0269   | 91.7950   |
| Frequencies | -- | 97.0195    | 102.7614  | 104.8699  |
| Frequencies | -- | 109.0424   | 111.9713  | 115.8934  |
| Frequencies | -- | 119.9545   | 124.5987  | 125.8733  |
| Frequencies | -- | 129.6255   | 134.6726  | 138.2530  |
| Frequencies | -- | 142.9861   | 143.2377  | 146.3409  |
| Frequencies | -- | 155.6002   | 158.6236  | 161.1676  |
| Frequencies | -- | 161.9048   | 166.9520  | 172.0870  |
| Frequencies | -- | 183.3685   | 200.9988  | 211.9082  |
| Frequencies | -- | 215.4188   | 219.4220  | 223.6116  |
| Frequencies | -- | 231.2722   | 233.6584  | 240.5200  |
| Frequencies | -- | 248.4651   | 262.1887  | 264.2977  |
| Frequencies | -- | 264.5627   | 265.3706  | 274.4158  |
| Frequencies | -- | 275.6017   | 278.2518  | 282.2968  |
| Frequencies | -- | 288.3153   | 292.0006  | 301.1352  |
| Frequencies | -- | 302.2189   | 302.7303  | 306.9500  |
| Frequencies | -- | 322.3347   | 325.4954  | 330.4188  |
| Frequencies | -- | 339.8286   | 350.8951  | 361.1729  |
| Frequencies | -- | 371.6796   | 377.4016  | 378.5210  |
| Frequencies | -- | 381.1342   | 382.3218  | 390.7119  |
| Frequencies | -- | 395.7796   | 402.2177  | 412.2246  |
| Frequencies | -- | 428.5112   | 431.4612  | 432.2299  |
| Frequencies | -- | 433.6386   | 444.5322  | 451.7934  |
| Frequencies | -- | 456.4782   | 464.0363  | 487.3224  |
| Frequencies | -- | 506.1853   | 531.4547  | 535.2714  |
| Frequencies | -- | 536.3646   | 537.4246  | 544.8695  |
| Frequencies | -- | 553.8693   | 555.4583  | 570.9728  |
| Frequencies | -- | 581.7417   | 593.9835  | 600.3486  |
| Frequencies | -- | 603.6831   | 612.0856  | 627.5286  |
| Frequencies | -- | 634.8031   | 635.7906  | 638.1997  |
| Frequencies | -- | 643.0437   | 654.4576  | 670.7994  |
| Frequencies | -- | 691.6735   | 695.9870  | 698.7997  |
| Frequencies | -- | 718.5859   | 723.2623  | 733.4544  |
| Frequencies | -- | 746.4761   | 748.7552  | 761.8777  |
| Frequencies | -- | 771.3430   | 799.8192  | 803.4299  |
| Frequencies | -- | 817.5811   | 830.5170  | 842.4519  |
| Frequencies | -- | 871.6522   | 879.1351  | 883.8229  |
| Frequencies | -- | 903.3500   | 912.4854  | 919.5899  |
| Frequencies | -- | 925.8775   | 953.6131  | 967.5347  |
| Frequencies | -- | 968.8096   | 969.1632  | 1005.6852 |
| Frequencies | -- | 1017.4107  | 1018.5257 | 1028.6609 |
| Frequencies | -- | 1038.3318  | 1040.0381 | 1042.9092 |
| Frequencies | -- | 1044.1978  | 1046.4511 | 1049.8987 |
| Frequencies | -- | 1052.7608  | 1053.3504 | 1057.1541 |
| Frequencies | -- | 1064.4706  | 1085.6425 | 1088.2620 |
| Frequencies | -- | 1094.5359  | 1116.3848 | 1123.5754 |
| Frequencies | -- | 1170.3070  | 1174.2361 | 1192.5119 |
| Frequencies | -- | 1209.8601  | 1213.3386 | 1216.4006 |
| Frequencies | -- | 1252.5919  | 1265.2761 | 1303.4852 |
| Frequencies | -- | 1307.0797  | 1316.5178 | 1320.4401 |
| Frequencies | -- | 1326.1734  | 1337.6199 | 1343.5185 |
| Frequencies | -- | 1345.2330  | 1349.5420 | 1352.0144 |
| Frequencies | -- | 1407.4849  | 1408.1168 | 1411.5679 |

|                |           |           |           |
|----------------|-----------|-----------|-----------|
| Frequencies -- | 1413.3236 | 1419.8134 | 1422.0084 |
| Frequencies -- | 1422.9578 | 1425.9587 | 1428.1533 |
| Frequencies -- | 1430.0078 | 1435.7097 | 1450.7459 |
| Frequencies -- | 1451.5835 | 1463.2939 | 1467.6680 |
| Frequencies -- | 1469.0024 | 1470.5965 | 1471.6124 |
| Frequencies -- | 1479.6120 | 1481.6560 | 1488.0344 |
| Frequencies -- | 1488.9998 | 1494.1923 | 1498.2884 |
| Frequencies -- | 1500.2580 | 1504.7882 | 1505.5182 |
| Frequencies -- | 1510.1850 | 1514.2649 | 1526.4195 |
| Frequencies -- | 1577.9294 | 1594.0610 | 1596.0741 |
| Frequencies -- | 1597.5038 | 1598.9597 | 1617.4087 |
| Frequencies -- | 1620.5516 | 1622.7249 | 1821.7454 |
| Frequencies -- | 2941.7293 | 3008.5320 | 3010.7002 |
| Frequencies -- | 3012.2886 | 3014.8215 | 3020.7829 |
| Frequencies -- | 3032.2180 | 3088.0524 | 3095.9691 |
| Frequencies -- | 3097.9162 | 3099.0717 | 3102.5667 |
| Frequencies -- | 3103.0581 | 3128.7469 | 3136.9762 |
| Frequencies -- | 3141.4515 | 3145.9554 | 3154.5815 |
| Frequencies -- | 3170.4650 | 3190.8038 | 3192.3695 |
| Frequencies -- | 3193.5038 | 3209.3081 | 3213.3457 |

**Catalyst 8:**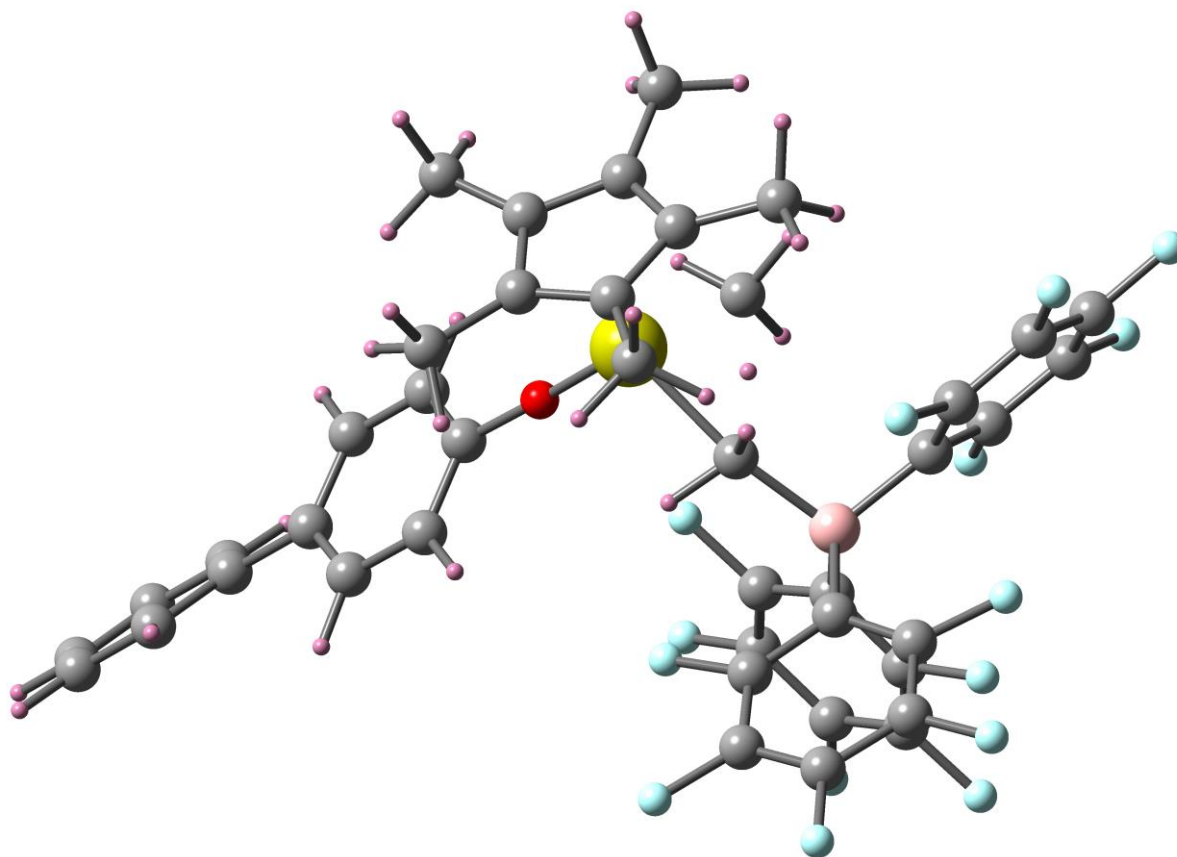

| <b>vacuum</b> | <b>toluene-like solvent</b> | <b>D3 dispersion</b> |
|---------------|-----------------------------|----------------------|
| -3273.3085715 | -3273.3224593               | -0.62631293          |

Imaginary frequency corresponding to vibration along the reaction coordinate:  $-970 \text{ cm}^{-1}$ .

|    |             |             |             |
|----|-------------|-------------|-------------|
| Ti | -0.57012200 | 2.26243200  | 0.02429300  |
| C  | 0.15907900  | 2.01959700  | -2.17125800 |
| H  | 0.25346600  | 1.11409100  | -2.78755700 |
| H  | -0.81054200 | 2.46664900  | -2.43734800 |
| H  | 0.96830900  | 2.71257900  | -2.42073400 |
| O  | -2.18949200 | 1.54443700  | -0.12378300 |
| C  | -3.47932600 | 1.04376000  | -0.10060900 |
| C  | -3.87210200 | 0.15615500  | 0.92980100  |
| C  | -4.39354000 | 1.38991600  | -1.12356800 |
| C  | -5.17476400 | -0.37097500 | 0.93345900  |
| C  | -5.69175100 | 0.85052200  | -1.10775400 |
| C  | -6.11613800 | -0.03865300 | -0.08109400 |
| H  | -5.44846100 | -1.08184800 | 1.71388500  |
| H  | -6.39040300 | 1.14296600  | -1.89264200 |
| C  | 0.33288500  | 3.73165000  | 1.76225300  |
| C  | 0.92051600  | 4.20182700  | 0.53803500  |
| C  | -1.11309300 | 3.88360500  | 1.65743300  |
| C  | -0.15499800 | 4.64498800  | -0.33282000 |
| C  | -1.40507000 | 4.48440000  | 0.37588400  |

|   |             |             |             |
|---|-------------|-------------|-------------|
| F | -0.71182600 | -5.40005300 | -2.68571200 |
| C | -0.14708900 | -4.27797700 | -2.09584000 |
| C | 1.18191900  | -4.29899200 | -1.63933800 |
| C | -0.88757900 | -3.09552400 | -1.95023200 |
| C | 1.72598000  | -3.14690400 | -1.04361800 |
| F | 1.94440200  | -5.45181100 | -1.78865100 |
| C | -0.28877900 | -1.97138600 | -1.34707700 |
| F | -2.20171600 | -3.03863100 | -2.40698500 |
| C | 1.03003000  | -1.92732400 | -0.85253600 |
| F | 3.06668600  | -3.24494300 | -0.65457200 |
| F | -1.10882300 | -0.83270100 | -1.28559400 |
| B | 1.76050100  | -0.65130800 | -0.06105500 |
| C | 2.22356800  | -1.31477400 | 1.42226400  |
| C | 3.02399100  | 0.00880100  | -0.93230100 |
| C | 0.77097900  | 0.66800200  | 0.31859600  |
| C | 3.53991900  | -1.63146400 | 1.83975100  |
| C | 1.24615600  | -1.67665200 | 2.38106800  |
| C | 3.27431000  | -0.20610700 | -2.30784200 |
| C | 3.92165200  | 0.93929100  | -0.35623400 |
| H | -0.12985600 | 0.28346100  | 0.84876600  |
| H | 1.39199500  | 1.28519000  | 0.98823600  |
| H | 0.52261200  | 1.32674900  | -1.09669900 |
| C | 3.86405400  | -2.19899700 | 3.08973900  |
| F | 4.63355000  | -1.41711000 | 0.99847200  |
| C | 1.51419700  | -2.24580900 | 3.63988500  |
| F | -0.12594600 | -1.50120500 | 2.09644600  |
| C | 4.33595300  | 0.38134900  | -3.02917300 |
| F | 2.43306700  | -1.02400500 | -3.07559300 |
| C | 4.99214300  | 1.55581600  | -1.02516200 |
| F | 3.76918000  | 1.31128100  | 0.99292200  |
| C | 2.84474100  | -2.50414800 | 4.00566500  |
| F | 5.18667600  | -2.46763100 | 3.42269600  |
| F | 0.47845700  | -2.55388800 | 4.51842500  |
| C | 5.21260500  | 1.26577800  | -2.38213900 |
| F | 4.51089500  | 0.10549700  | -4.38070100 |
| F | 5.82363500  | 2.45532300  | -0.36361000 |
| F | 3.14379000  | -3.05867000 | 5.24216400  |
| F | 6.25834600  | 1.86157400  | -3.07244800 |
| C | 0.02930700  | 5.37516800  | -1.64371900 |
| H | -0.01106800 | 6.46498700  | -1.47419000 |
| H | 1.00052100  | 5.15653300  | -2.10479300 |
| H | -0.75243200 | 5.13778600  | -2.37927500 |
| C | 2.39711900  | 4.35218300  | 0.24765600  |
| H | 2.73464800  | 3.74738200  | -0.60545900 |
| H | 2.63056000  | 5.40286300  | 0.01182600  |
| H | 3.00825900  | 4.06199300  | 1.10923700  |
| C | 1.08129000  | 3.28635900  | 3.00043200  |
| H | 1.90226400  | 2.59160100  | 2.77952500  |
| H | 1.52468400  | 4.16367800  | 3.50116100  |
| H | 0.42093300  | 2.79807700  | 3.72890700  |
| C | -2.10817300 | 3.62861600  | 2.76874000  |
| H | -1.86544600 | 2.73157200  | 3.35631800  |
| H | -2.11546700 | 4.48091600  | 3.47025800  |
| H | -3.13051800 | 3.50880600  | 2.38839500  |
| C | -2.75756900 | 4.96727600  | -0.09670800 |
| H | -3.58105900 | 4.33740900  | 0.26299900  |
| H | -2.93896000 | 5.98846600  | 0.28189600  |



|   |              |             |             |
|---|--------------|-------------|-------------|
| H | -2.82377500  | 5.01564000  | -1.19240200 |
| H | -3.15424300  | -0.13802100 | 1.69588900  |
| H | -4.08602400  | 2.06683600  | -1.92108400 |
| C | -7.49636200  | -0.61269800 | -0.07492400 |
| C | -8.19795800  | -0.82618000 | 1.14395200  |
| C | -8.14879200  | -0.96767900 | -1.28815800 |
| C | -9.49816500  | -1.37081000 | 1.15042600  |
| H | -7.73722300  | -0.54004700 | 2.09129100  |
| C | -9.44807800  | -1.51431900 | -1.28328400 |
| H | -7.62545900  | -0.85130100 | -2.23882800 |
| C | -10.13103000 | -1.71828700 | -0.06368400 |
| H | -10.01819800 | -1.51699900 | 2.10009000  |
| H | -9.92104600  | -1.79140500 | -2.22833000 |
| H | -11.13750900 | -2.14272700 | -0.05938700 |

|                |           |          |          |
|----------------|-----------|----------|----------|
| Frequencies -- | -969.8636 | 5.9919   | 8.2329   |
| Frequencies -- | 10.7438   | 17.1850  | 19.2947  |
| Frequencies -- | 27.5830   | 29.0336  | 31.9207  |
| Frequencies -- | 36.5015   | 40.2018  | 45.2021  |
| Frequencies -- | 47.8675   | 50.5592  | 60.3199  |
| Frequencies -- | 66.3972   | 69.5973  | 85.0221  |
| Frequencies -- | 88.9071   | 91.5553  | 98.7034  |
| Frequencies -- | 104.9404  | 107.6831 | 112.2731 |
| Frequencies -- | 114.6627  | 115.5476 | 122.9386 |
| Frequencies -- | 125.3624  | 128.4599 | 130.7315 |
| Frequencies -- | 138.1021  | 139.9713 | 143.4745 |
| Frequencies -- | 143.6886  | 145.2534 | 156.1956 |
| Frequencies -- | 157.6800  | 161.3343 | 162.7168 |
| Frequencies -- | 164.7984  | 168.7978 | 175.7036 |
| Frequencies -- | 189.6987  | 203.6633 | 209.4976 |
| Frequencies -- | 215.0576  | 219.4423 | 223.9401 |
| Frequencies -- | 224.8934  | 239.7614 | 248.4647 |
| Frequencies -- | 264.3557  | 264.6750 | 265.0187 |
| Frequencies -- | 271.8780  | 274.6015 | 276.1036 |
| Frequencies -- | 279.7178  | 281.6990 | 285.7809 |
| Frequencies -- | 291.1256  | 301.7650 | 302.1049 |
| Frequencies -- | 302.9731  | 307.4216 | 320.1139 |
| Frequencies -- | 326.2903  | 329.7640 | 334.8873 |
| Frequencies -- | 342.6994  | 359.7392 | 370.0273 |
| Frequencies -- | 375.5973  | 377.7886 | 379.0831 |
| Frequencies -- | 381.7945  | 390.6523 | 395.0321 |
| Frequencies -- | 400.6032  | 406.2975 | 413.7143 |
| Frequencies -- | 415.7699  | 427.6560 | 431.3686 |
| Frequencies -- | 432.2740  | 433.6977 | 450.4704 |
| Frequencies -- | 456.6901  | 457.1864 | 463.8685 |
| Frequencies -- | 478.7450  | 510.0260 | 532.2260 |
| Frequencies -- | 536.0918  | 537.2808 | 539.1664 |
| Frequencies -- | 544.5209  | 553.2966 | 554.5205 |
| Frequencies -- | 557.7640  | 576.6451 | 581.7091 |
| Frequencies -- | 593.1759  | 599.1076 | 603.1436 |
| Frequencies -- | 616.0307  | 622.0890 | 635.2434 |
| Frequencies -- | 636.3811  | 638.2668 | 638.8043 |
| Frequencies -- | 642.8266  | 644.0534 | 655.7661 |
| Frequencies -- | 669.3633  | 694.1789 | 706.5397 |
| Frequencies -- | 718.6710  | 722.1254 | 722.7551 |
| Frequencies -- | 733.4368  | 746.0733 | 747.4865 |
| Frequencies -- | 749.5268  | 762.2026 | 770.8878 |
| Frequencies -- | 773.0137  | 801.5749 | 804.2639 |
| Frequencies -- | 827.0825  | 841.2429 | 845.6350 |
| Frequencies -- | 858.2260  | 872.3117 | 885.0210 |
| Frequencies -- | 889.8305  | 903.9358 | 913.1708 |

|                |           |           |           |
|----------------|-----------|-----------|-----------|
| Frequencies -- | 920.0130  | 928.5520  | 931.5711  |
| Frequencies -- | 960.0217  | 968.5464  | 970.5990  |
| Frequencies -- | 973.4583  | 985.9251  | 1000.0603 |
| Frequencies -- | 1005.5958 | 1009.4983 | 1018.8281 |
| Frequencies -- | 1022.2749 | 1028.7310 | 1038.9175 |
| Frequencies -- | 1040.1706 | 1043.6878 | 1045.2928 |
| Frequencies -- | 1047.4343 | 1049.6245 | 1049.8872 |
| Frequencies -- | 1051.9256 | 1054.1447 | 1057.4243 |
| Frequencies -- | 1061.8740 | 1087.2942 | 1088.6117 |
| Frequencies -- | 1095.8197 | 1097.5841 | 1123.8342 |
| Frequencies -- | 1129.1621 | 1170.3727 | 1174.9719 |
| Frequencies -- | 1184.5232 | 1199.2618 | 1209.3957 |
| Frequencies -- | 1211.4834 | 1213.0973 | 1216.0644 |
| Frequencies -- | 1252.2869 | 1267.9810 | 1298.3164 |
| Frequencies -- | 1300.7453 | 1315.5814 | 1316.2550 |
| Frequencies -- | 1319.3303 | 1325.6532 | 1326.1899 |
| Frequencies -- | 1337.2354 | 1343.3112 | 1348.2681 |
| Frequencies -- | 1351.0656 | 1357.5635 | 1375.0022 |
| Frequencies -- | 1410.1580 | 1411.1137 | 1413.0747 |
| Frequencies -- | 1419.2171 | 1421.8779 | 1424.0166 |
| Frequencies -- | 1425.0285 | 1425.6875 | 1428.0833 |
| Frequencies -- | 1429.8764 | 1434.1284 | 1449.6973 |
| Frequencies -- | 1451.9176 | 1453.4794 | 1461.9310 |
| Frequencies -- | 1464.6521 | 1467.3139 | 1468.9897 |
| Frequencies -- | 1471.5269 | 1482.4539 | 1487.6086 |
| Frequencies -- | 1488.5428 | 1490.8401 | 1493.2983 |
| Frequencies -- | 1499.0375 | 1500.2216 | 1503.8003 |
| Frequencies -- | 1506.3483 | 1511.1159 | 1515.3263 |
| Frequencies -- | 1517.5970 | 1520.6148 | 1571.8078 |
| Frequencies -- | 1593.8913 | 1595.8678 | 1598.3222 |
| Frequencies -- | 1599.5725 | 1617.1869 | 1618.3524 |
| Frequencies -- | 1619.7834 | 1622.5871 | 1624.8443 |
| Frequencies -- | 1814.7234 | 2925.6089 | 3009.5067 |
| Frequencies -- | 3010.4201 | 3012.8591 | 3018.6061 |
| Frequencies -- | 3025.3903 | 3031.6349 | 3094.6532 |
| Frequencies -- | 3097.9922 | 3098.5080 | 3100.8940 |
| Frequencies -- | 3106.0929 | 3110.2432 | 3128.7973 |
| Frequencies -- | 3138.6334 | 3142.7060 | 3144.9150 |
| Frequencies -- | 3146.7929 | 3154.6792 | 3160.2670 |
| Frequencies -- | 3161.1949 | 3174.1867 | 3177.1307 |
| Frequencies -- | 3181.3395 | 3183.8684 | 3187.1100 |
| Frequencies -- | 3195.0489 | 3198.7501 | 3204.3505 |

**Catalyst 9:**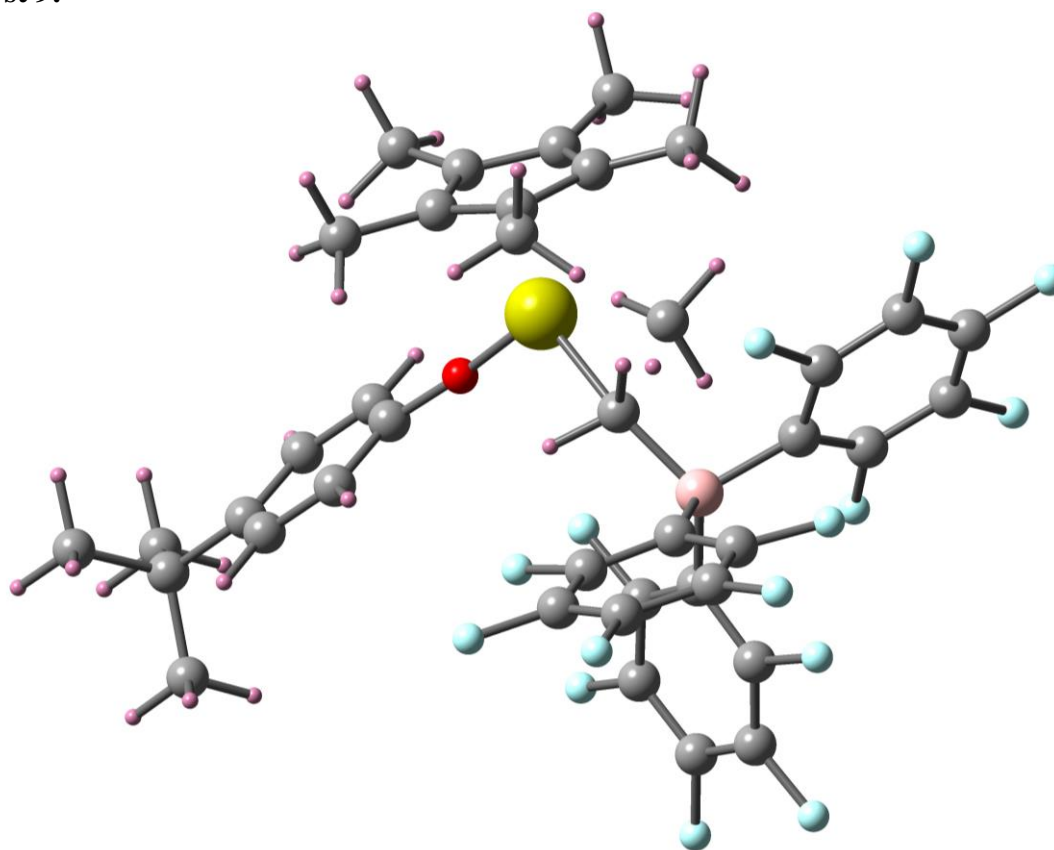

| vacuum        | toluene-like solvent | D3 dispersion |
|---------------|----------------------|---------------|
| -3199.5142883 | -3991.524761*        | -0.62232474   |

\*SCF energy in toluene equals LANL2DZ vacuum energy plus 6-311++G\*\* solvation energy, because PCM calculation did not converge with LANL2DZ basis sets.

Imaginary frequency corresponding to vibration along the reaction coordinate:  $-975 \text{ cm}^{-1}$ .

|    |             |             |             |
|----|-------------|-------------|-------------|
| Ti | -0.99206700 | 2.14084500  | 0.02029000  |
| C  | -0.22254700 | 1.97902900  | -2.16920000 |
| H  | -0.02866900 | 1.09332600  | -2.79105400 |
| H  | -1.22971400 | 2.32671400  | -2.44395700 |
| H  | 0.51472200  | 2.75274700  | -2.40316300 |
| O  | -2.54063400 | 1.28982000  | -0.14769200 |
| C  | -3.78414800 | 0.67721400  | -0.13026900 |
| C  | -4.10256700 | -0.23985800 | 0.89936500  |
| C  | -4.72147700 | 0.93766200  | -1.15268800 |
| C  | -5.35365300 | -0.87895300 | 0.89523700  |
| C  | -5.96958800 | 0.28170500  | -1.13960700 |
| C  | -6.32264800 | -0.64183000 | -0.12111200 |
| H  | -5.56586400 | -1.58492200 | 1.69834300  |
| H  | -6.66371800 | 0.49913900  | -1.94917100 |
| C  | -0.20871500 | 3.67268000  | 1.76902700  |
| C  | 0.33071900  | 4.20277600  | 0.54733100  |
| C  | -1.66256300 | 3.69456200  | 1.66812600  |
| C  | -0.78234400 | 4.55544800  | -0.31750500 |
| C  | -2.01073000 | 4.27817200  | 0.39256700  |

|   |             |             |             |
|---|-------------|-------------|-------------|
| F | -0.42510200 | -5.50736700 | -2.71071800 |
| C | 0.03130400  | -4.33934400 | -2.11569300 |
| C | 1.35532400  | -4.23822700 | -1.65569200 |
| C | -0.81645200 | -3.23136900 | -1.96859300 |
| C | 1.78790000  | -3.04274500 | -1.05425900 |
| F | 2.22243200  | -5.31437600 | -1.80731300 |
| C | -0.32663300 | -2.05815600 | -1.36037300 |
| F | -2.12924500 | -3.29640500 | -2.42887100 |
| C | 0.98078400  | -1.89407900 | -0.86132000 |
| F | 3.13105400  | -3.01644400 | -0.66245400 |
| F | -1.24738100 | -1.00030100 | -1.29785700 |
| B | 1.58726600  | -0.55926300 | -0.06111000 |
| C | 2.09869100  | -1.18532600 | 1.42305400  |
| C | 2.79238700  | 0.21185300  | -0.92363300 |
| C | 0.48055500  | 0.66375000  | 0.31789300  |
| C | 3.43538000  | -1.38629700 | 1.84779700  |
| C | 1.15129400  | -1.63686100 | 2.37396600  |
| C | 3.06463200  | 0.02651100  | -2.29936800 |
| C | 3.60457600  | 1.21346800  | -0.34004800 |
| H | -0.38947300 | 0.19620900  | 0.83215600  |
| H | 1.03542300  | 1.32535000  | 1.00265100  |
| H | 0.19002900  | 1.31438900  | -1.09478200 |
| C | 3.80089500  | -1.92911800 | 3.09737900  |
| F | 4.51075700  | -1.07193700 | 1.01455800  |
| C | 1.46114200  | -2.18567900 | 3.63223900  |
| F | -0.22895600 | -1.58375200 | 2.08076000  |
| C | 4.07270600  | 0.70797800  | -3.01489000 |
| F | 2.29998000  | -0.85789700 | -3.07385800 |
| C | 4.61897000  | 1.92418700  | -1.00290800 |
| F | 3.41734100  | 1.56367000  | 1.01019700  |
| C | 2.80703200  | -2.32710900 | 4.00555400  |
| F | 5.14006800  | -2.08260700 | 3.43741700  |
| F | 0.45136900  | -2.58828500 | 4.50291500  |
| C | 4.86708800  | 1.66208000  | -2.36071900 |
| F | 4.27442100  | 0.45530200  | -4.36729300 |
| F | 5.36771800  | 2.88876200  | -0.33417800 |
| F | 3.14632100  | -2.85945300 | 5.24154400  |
| F | 5.85801000  | 2.35149200  | -3.04493900 |
| C | -0.66734300 | 5.30640800  | -1.62460100 |
| H | -0.80943500 | 6.38671700  | -1.45000700 |
| H | 0.32009500  | 5.18221900  | -2.08670000 |
| H | -1.42311400 | 4.99989800  | -2.36183200 |
| C | 1.78725600  | 4.48444400  | 0.25382500  |
| H | 2.17354700  | 3.91377500  | -0.60201300 |
| H | 1.92641400  | 5.55219400  | 0.02005200  |
| H | 2.42422500  | 4.24734700  | 1.11295900  |
| C | 0.57994200  | 3.28981900  | 3.00329400  |
| H | 1.44911500  | 2.65707700  | 2.78009700  |
| H | 0.96066600  | 4.19992400  | 3.49695500  |
| H | -0.03730500 | 2.75766900  | 3.73883200  |
| C | -2.62991900 | 3.35097300  | 2.78016200  |
| H | -2.30979600 | 2.47763200  | 3.36620000  |
| H | -2.71058800 | 4.19828000  | 3.48323000  |
| H | -3.63858700 | 3.14382500  | 2.40047400  |
| C | -3.40448900 | 4.64157900  | -0.06799300 |
| H | -4.15519000 | 3.89750000  | 0.22801400  |
| H | -3.70427200 | 5.60415400  | 0.38198400  |

|   |             |             |             |
|---|-------------|-------------|-------------|
| H | -3.46341100 | 4.76435800  | -1.15799900 |
| H | -3.37081400 | -0.46061100 | 1.67716200  |
| H | -4.47073300 | 1.63017000  | -1.95709200 |
| C | -7.68621800 | -1.38810700 | -0.08807000 |
| C | -8.45446400 | -1.01223300 | 1.22197100  |
| H | -9.42455300 | -1.53293500 | 1.25577700  |
| H | -7.89313500 | -1.29521300 | 2.12421200  |
| H | -8.64646200 | 0.07124000  | 1.26917100  |
| C | -8.59454600 | -1.02533100 | -1.29948400 |
| H | -9.54231700 | -1.57988500 | -1.22690400 |
| H | -8.84186600 | 0.04740800  | -1.32358400 |
| H | -8.12711000 | -1.29698600 | -2.25848400 |
| C | -7.43643400 | -2.93211600 | -0.12112800 |
| H | -6.89392800 | -3.22351600 | -1.03362700 |
| H | -6.84894200 | -3.27519400 | 0.74237400  |
| H | -8.39669900 | -3.47179600 | -0.10657300 |

|                |           |          |          |
|----------------|-----------|----------|----------|
| Frequencies -- | -975.0104 | 8.2091   | 12.9820  |
| Frequencies -- | 15.5484   | 19.6093  | 23.8788  |
| Frequencies -- | 27.9669   | 29.1331  | 32.2023  |
| Frequencies -- | 37.1944   | 41.1865  | 46.8987  |
| Frequencies -- | 49.1491   | 52.4276  | 53.9220  |
| Frequencies -- | 67.4096   | 74.2037  | 76.8236  |
| Frequencies -- | 94.0647   | 96.5869  | 97.4963  |
| Frequencies -- | 102.7228  | 109.2690 | 112.0818 |
| Frequencies -- | 113.4388  | 116.8692 | 121.0858 |
| Frequencies -- | 125.0451  | 126.7380 | 132.0475 |
| Frequencies -- | 137.9508  | 142.3900 | 143.5026 |
| Frequencies -- | 145.1185  | 155.8141 | 157.8861 |
| Frequencies -- | 161.4305  | 162.1984 | 167.8365 |
| Frequencies -- | 171.7933  | 176.8543 | 187.8385 |
| Frequencies -- | 205.7310  | 212.1320 | 215.4248 |
| Frequencies -- | 217.0138  | 223.6079 | 224.2607 |
| Frequencies -- | 227.9263  | 242.4617 | 246.1946 |
| Frequencies -- | 251.0282  | 261.5141 | 264.2672 |
| Frequencies -- | 264.5609  | 265.2552 | 274.0508 |
| Frequencies -- | 275.4205  | 276.9658 | 280.9410 |
| Frequencies -- | 285.6048  | 290.3341 | 297.4442 |
| Frequencies -- | 299.4804  | 302.0120 | 302.4644 |
| Frequencies -- | 307.3560  | 319.4498 | 323.7412 |
| Frequencies -- | 325.8491  | 329.7838 | 331.2123 |
| Frequencies -- | 339.0322  | 359.0516 | 363.5278 |
| Frequencies -- | 371.4035  | 377.1702 | 378.4742 |
| Frequencies -- | 379.6989  | 381.2839 | 387.8121 |
| Frequencies -- | 395.5155  | 400.3280 | 411.7945 |
| Frequencies -- | 417.8532  | 426.0737 | 431.3833 |
| Frequencies -- | 432.1661  | 433.5371 | 448.5220 |
| Frequencies -- | 451.6301  | 456.7160 | 463.9548 |
| Frequencies -- | 475.1562  | 482.2613 | 531.8982 |
| Frequencies -- | 535.4587  | 536.7791 | 539.0469 |
| Frequencies -- | 544.6575  | 552.1557 | 554.1456 |
| Frequencies -- | 558.3206  | 561.2850 | 576.8835 |
| Frequencies -- | 581.8229  | 593.7208 | 601.5084 |
| Frequencies -- | 602.1565  | 617.8850 | 634.9461 |
| Frequencies -- | 635.9738  | 638.1656 | 638.7313 |
| Frequencies -- | 642.8130  | 655.1210 | 669.8986 |
| Frequencies -- | 694.9620  | 714.2706 | 718.4613 |
| Frequencies -- | 722.8052  | 732.9867 | 734.4149 |
| Frequencies -- | 746.0723  | 748.7713 | 761.7380 |
| Frequencies -- | 770.6800  | 802.1905 | 804.2001 |
| Frequencies -- | 825.8620  | 834.8475 | 840.1016 |

|                |           |           |           |
|----------------|-----------|-----------|-----------|
| Frequencies -- | 840.5568  | 873.3726  | 882.8444  |
| Frequencies -- | 892.1584  | 903.8792  | 912.7232  |
| Frequencies -- | 920.0408  | 924.0561  | 933.5298  |
| Frequencies -- | 935.5866  | 957.5451  | 964.0372  |
| Frequencies -- | 969.0816  | 969.2917  | 981.0996  |
| Frequencies -- | 1005.2394 | 1018.5616 | 1022.8822 |
| Frequencies -- | 1028.2352 | 1037.7704 | 1038.1746 |
| Frequencies -- | 1039.4022 | 1042.2272 | 1043.5457 |
| Frequencies -- | 1045.4676 | 1048.5912 | 1050.3044 |
| Frequencies -- | 1052.0436 | 1055.1413 | 1057.3963 |
| Frequencies -- | 1086.2965 | 1089.1888 | 1096.2217 |
| Frequencies -- | 1120.7457 | 1123.7797 | 1133.4679 |
| Frequencies -- | 1170.7520 | 1174.4533 | 1204.2531 |
| Frequencies -- | 1209.1446 | 1212.8493 | 1214.4276 |
| Frequencies -- | 1215.8068 | 1222.2744 | 1251.3740 |
| Frequencies -- | 1267.1979 | 1274.7089 | 1304.3414 |
| Frequencies -- | 1315.9601 | 1319.7899 | 1326.2022 |
| Frequencies -- | 1327.0500 | 1337.0012 | 1343.0319 |
| Frequencies -- | 1345.6352 | 1351.7768 | 1352.0483 |
| Frequencies -- | 1399.2184 | 1401.4585 | 1409.3134 |
| Frequencies -- | 1411.0976 | 1414.2481 | 1419.2258 |
| Frequencies -- | 1422.0501 | 1422.5614 | 1422.8959 |
| Frequencies -- | 1424.4581 | 1428.0185 | 1428.8057 |
| Frequencies -- | 1430.2139 | 1434.2477 | 1449.9628 |
| Frequencies -- | 1452.6771 | 1463.0388 | 1467.3385 |
| Frequencies -- | 1468.5145 | 1470.4838 | 1471.2713 |
| Frequencies -- | 1482.6601 | 1482.8673 | 1488.1048 |
| Frequencies -- | 1488.8138 | 1489.8026 | 1490.0555 |
| Frequencies -- | 1493.5971 | 1499.0644 | 1499.6909 |
| Frequencies -- | 1501.4947 | 1504.5199 | 1505.6347 |
| Frequencies -- | 1508.1311 | 1511.5369 | 1512.5319 |
| Frequencies -- | 1514.6327 | 1520.7212 | 1521.0405 |
| Frequencies -- | 1579.7508 | 1594.0630 | 1596.0626 |
| Frequencies -- | 1599.1962 | 1616.9992 | 1618.6296 |
| Frequencies -- | 1619.8002 | 1622.2966 | 1812.7879 |
| Frequencies -- | 2929.5983 | 3008.4555 | 3008.6028 |
| Frequencies -- | 3009.9105 | 3010.6783 | 3013.0825 |
| Frequencies -- | 3016.9210 | 3018.3935 | 3027.1479 |
| Frequencies -- | 3033.5862 | 3088.8956 | 3097.4148 |
| Frequencies -- | 3098.3080 | 3101.2961 | 3109.0657 |
| Frequencies -- | 3109.3394 | 3109.3578 | 3112.7372 |
| Frequencies -- | 3115.5528 | 3122.9212 | 3125.6335 |
| Frequencies -- | 3129.7672 | 3129.8201 | 3137.3498 |
| Frequencies -- | 3140.8320 | 3143.6102 | 3145.3989 |
| Frequencies -- | 3161.0681 | 3181.4398 | 3183.2040 |
| Frequencies -- | 3189.5864 | 3202.0299 | 3212.4785 |

**Catalyst 10:**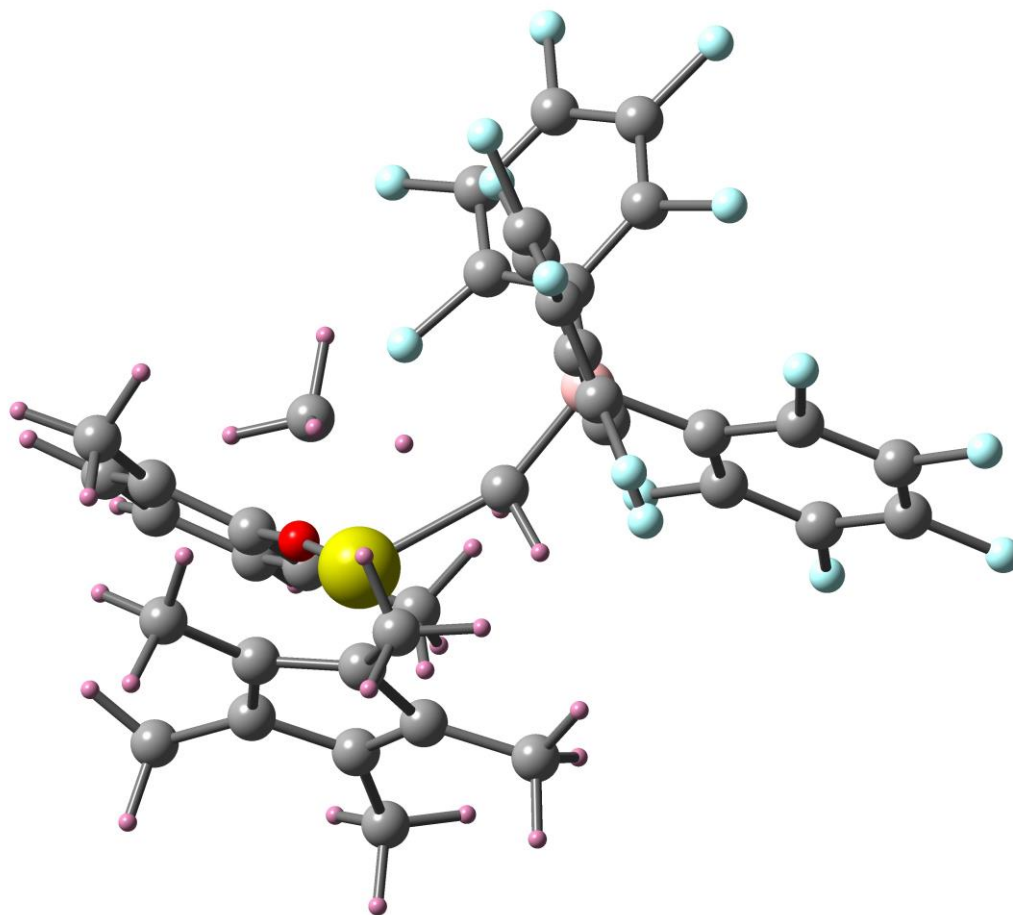

| <b>vacuum</b> | <b>toluene-like solvent</b> | <b>D3 dispersion</b> |
|---------------|-----------------------------|----------------------|
| -3120.9432301 | -3120.9546399               | -0.59403760          |

Imaginary frequency corresponding to vibration along the reaction coordinate:  $-1008\text{ cm}^{-1}$ .

|    |            |             |             |
|----|------------|-------------|-------------|
| Ti | 2.18232200 | -1.12563200 | 0.17206200  |
| C  | 1.42553900 | -1.35834100 | -2.02644700 |
| H  | 0.90895800 | -0.62182300 | -2.65784200 |
| H  | 2.48624300 | -1.31105700 | -2.30384300 |
| H  | 1.03453400 | -2.35715800 | -2.23945500 |
| O  | 3.25365400 | 0.28336700  | -0.02434200 |
| C  | 4.15774700 | 1.34610200  | -0.06301900 |
| C  | 4.21416500 | 2.24975200  | 1.03987100  |
| C  | 4.97914200 | 1.50620200  | -1.21882300 |
| C  | 5.15941500 | 3.30057900  | 0.97923000  |
| C  | 5.90186400 | 2.57739100  | -1.22775800 |
| C  | 6.00212000 | 3.46506700  | -0.13770800 |
| H  | 5.22007600 | 4.00251200  | 1.81304300  |
| H  | 6.53848900 | 2.71875500  | -2.10322400 |
| H  | 6.72139800 | 4.28569200  | -0.16464000 |
| C  | 3.19902000 | -2.32934100 | 1.94042800  |
| C  | 1.91174100 | -2.99461300 | 1.78474400  |
| C  | 3.98744100 | -2.59300600 | 0.75732100  |
| C  | 1.88958500 | -3.61610500 | 0.49267500  |

|   |             |             |             |
|---|-------------|-------------|-------------|
| C | 3.16362300  | -3.34496600 | -0.15965000 |
| F | -1.48923400 | 5.52252600  | -2.74395900 |
| C | -1.42962300 | 4.27555700  | -2.13812800 |
| C | -2.60338000 | 3.61407700  | -1.73848700 |
| C | -0.19674800 | 3.64346000  | -1.91941400 |
| C | -2.51054000 | 2.35143100  | -1.12578500 |
| F | -3.83984100 | 4.20873300  | -1.96159700 |
| C | -0.16559200 | 2.37717400  | -1.30155600 |
| F | 0.98327000  | 4.26643600  | -2.31781000 |
| C | -1.29912900 | 1.66412100  | -0.86274300 |
| F | -3.73117100 | 1.74796600  | -0.80329000 |
| F | 1.12071900  | 1.82728500  | -1.16198100 |
| B | -1.31485100 | 0.19396500  | -0.06911700 |
| C | -2.16240700 | 0.50771900  | 1.35871400  |
| C | -1.99858200 | -1.02168100 | -0.99082900 |
| C | 0.19720700  | -0.40920600 | 0.40685800  |
| C | -3.47619800 | 0.08422500  | 1.67927800  |
| C | -1.59194100 | 1.31779100  | 2.36947400  |
| C | -2.26261600 | -0.96090300 | -2.37877400 |
| C | -2.30216300 | -2.28717100 | -0.43606200 |
| H | 0.75412600  | 0.40536300  | 0.91730000  |
| H | -0.03816200 | -1.22896800 | 1.10445500  |
| H | 0.76916100  | -0.89847900 | -0.95410600 |
| C | -4.13804400 | 0.38517800  | 2.88788300  |
| F | -4.23430000 | -0.66275600 | 0.77511900  |
| C | -2.20706200 | 1.65025100  | 3.59080200  |
| F | -0.31581000 | 1.88983300  | 2.18058400  |
| C | -2.82374200 | -2.01365300 | -3.13341300 |
| F | -1.94090300 | 0.18156300  | -3.12596300 |
| C | -2.85721000 | -3.36990400 | -1.13732600 |
| F | -2.04512700 | -2.52767300 | 0.92762100  |
| C | -3.49799900 | 1.16964600  | 3.86039200  |
| F | -5.42571200 | -0.08234000 | 3.12408000  |
| F | -1.55144000 | 2.44739700  | 4.52577300  |
| C | -3.13382100 | -3.23098800 | -2.50773600 |
| F | -3.05463100 | -1.86243000 | -4.49617500 |
| F | -3.11939200 | -4.57703300 | -0.49438100 |
| F | -4.13070200 | 1.47318900  | 5.05756600  |
| F | -3.67574500 | -4.28400500 | -3.23078800 |
| C | 3.27036800  | 2.14380400  | 2.22362900  |
| H | 2.24749400  | 2.42982000  | 1.93774300  |
| H | 3.22173900  | 1.12684000  | 2.63394000  |
| H | 3.58501700  | 2.81610600  | 3.03332700  |
| C | 4.85290300  | 0.59800400  | -2.42874800 |
| H | 4.96838200  | -0.46364000 | -2.16517600 |
| H | 3.86787800  | 0.71730400  | -2.90675000 |
| H | 5.61756400  | 0.84127500  | -3.17887500 |
| C | 0.82454700  | -4.54582300 | -0.04032600 |
| H | 1.15258900  | -5.59161100 | 0.09312200  |
| H | -0.12880400 | -4.43713300 | 0.48634700  |
| H | 0.63586600  | -4.41138200 | -1.11441300 |
| C | 0.87117500  | -3.11896700 | 2.87549000  |
| H | -0.12061900 | -3.37359300 | 2.48630300  |
| H | 1.16549800  | -3.91939200 | 3.57622000  |
| H | 0.77055600  | -2.19789200 | 3.46803400  |
| C | 3.71225500  | -1.71683400 | 3.22541700  |
| H | 4.12411200  | -2.50987700 | 3.87420500  |



|                |            |             |             |
|----------------|------------|-------------|-------------|
| H              | 4.51795600 | -0.99205300 | 3.05161000  |
| H              | 2.92079200 | -1.21592000 | 3.79995400  |
| C              | 5.45011200 | -2.25478600 | 0.58161200  |
| H              | 5.71352400 | -1.28313400 | 1.01970600  |
| H              | 6.06787800 | -3.01873500 | 1.08542700  |
| H              | 5.75389300 | -2.24062700 | -0.47287800 |
| C              | 3.62662600 | -3.96506000 | -1.45877200 |
| H              | 4.38341000 | -3.35581600 | -1.97201700 |
| H              | 4.08568400 | -4.94899900 | -1.25928100 |
| H              | 2.80010000 | -4.13454800 | -2.16037200 |
| Frequencies -- | -1007.6984 | 8.8966      | 20.7159     |
| Frequencies -- | 22.8867    | 26.0413     | 28.9605     |
| Frequencies -- | 29.8866    | 33.0126     | 38.8758     |
| Frequencies -- | 40.7285    | 44.3971     | 49.2733     |
| Frequencies -- | 50.6001    | 66.3296     | 71.6940     |
| Frequencies -- | 90.4926    | 93.3012     | 102.3967    |
| Frequencies -- | 108.5301   | 111.3736    | 113.7508    |
| Frequencies -- | 114.9758   | 117.9948    | 120.5763    |
| Frequencies -- | 122.1799   | 125.9196    | 130.0922    |
| Frequencies -- | 137.5353   | 141.7941    | 142.0288    |
| Frequencies -- | 145.2418   | 145.9285    | 155.7587    |
| Frequencies -- | 158.0796   | 161.0068    | 161.8955    |
| Frequencies -- | 164.4464   | 170.5847    | 172.2052    |
| Frequencies -- | 174.0619   | 186.0767    | 189.6530    |
| Frequencies -- | 195.9703   | 208.7190    | 215.1389    |
| Frequencies -- | 217.9467   | 220.6364    | 220.8717    |
| Frequencies -- | 223.5448   | 236.1242    | 255.6193    |
| Frequencies -- | 261.2927   | 264.5329    | 264.8499    |
| Frequencies -- | 265.1937   | 275.3133    | 276.5246    |
| Frequencies -- | 278.5885   | 284.0283    | 290.0359    |
| Frequencies -- | 295.1120   | 302.8517    | 302.9630    |
| Frequencies -- | 303.3672   | 308.0391    | 317.3155    |
| Frequencies -- | 326.2395   | 329.5677    | 334.0809    |
| Frequencies -- | 335.0471   | 343.1469    | 357.5008    |
| Frequencies -- | 363.5754   | 373.5437    | 376.7111    |
| Frequencies -- | 377.7418   | 380.0746    | 381.4444    |
| Frequencies -- | 393.2493   | 399.0038    | 401.7508    |
| Frequencies -- | 431.9455   | 432.8571    | 434.4480    |
| Frequencies -- | 451.4345   | 456.9876    | 464.0794    |
| Frequencies -- | 487.0601   | 493.5470    | 511.4569    |
| Frequencies -- | 529.9016   | 533.0382    | 533.7081    |
| Frequencies -- | 538.9633   | 545.0223    | 547.5201    |
| Frequencies -- | 550.2960   | 553.8472    | 555.1023    |
| Frequencies -- | 563.8463   | 575.5194    | 584.1257    |
| Frequencies -- | 595.6745   | 601.3678    | 606.2260    |
| Frequencies -- | 615.0913   | 634.5914    | 635.7800    |
| Frequencies -- | 637.9868   | 642.0015    | 655.0467    |
| Frequencies -- | 672.6378   | 702.6195    | 716.9857    |
| Frequencies -- | 721.5956   | 733.2921    | 735.6002    |
| Frequencies -- | 741.9142   | 744.8218    | 747.7705    |
| Frequencies -- | 760.7141   | 769.5546    | 785.8756    |
| Frequencies -- | 800.5635   | 804.0431    | 842.1759    |
| Frequencies -- | 868.8834   | 879.3382    | 885.2943    |
| Frequencies -- | 903.4707   | 910.1181    | 912.0861    |
| Frequencies -- | 918.6533   | 921.9282    | 927.5403    |
| Frequencies -- | 966.5988   | 972.0943    | 987.1718    |
| Frequencies -- | 1003.1291  | 1007.2497   | 1017.8230   |
| Frequencies -- | 1027.4690  | 1038.8292   | 1041.0644   |
| Frequencies -- | 1043.9740  | 1045.5630   | 1046.4727   |
| Frequencies -- | 1048.0130  | 1049.1874   | 1049.8786   |
| Frequencies -- | 1053.0702  | 1055.8275   | 1056.8269   |

|                |           |           |           |
|----------------|-----------|-----------|-----------|
| Frequencies -- | 1059.5715 | 1086.5988 | 1088.1147 |
| Frequencies -- | 1090.6500 | 1111.4730 | 1125.5075 |
| Frequencies -- | 1171.1741 | 1174.5280 | 1193.5399 |
| Frequencies -- | 1197.4123 | 1209.7905 | 1212.5073 |
| Frequencies -- | 1215.6336 | 1264.4989 | 1279.4597 |
| Frequencies -- | 1282.2263 | 1304.0951 | 1317.6087 |
| Frequencies -- | 1319.5798 | 1325.1664 | 1337.4522 |
| Frequencies -- | 1344.0848 | 1350.4225 | 1358.5152 |
| Frequencies -- | 1360.0975 | 1408.9248 | 1410.8916 |
| Frequencies -- | 1413.9753 | 1417.5149 | 1419.0528 |
| Frequencies -- | 1421.4621 | 1422.5038 | 1424.1111 |
| Frequencies -- | 1425.4515 | 1427.0117 | 1428.6159 |
| Frequencies -- | 1429.0712 | 1435.5792 | 1450.6403 |
| Frequencies -- | 1452.6448 | 1465.3180 | 1467.8530 |
| Frequencies -- | 1468.9714 | 1470.3656 | 1471.6815 |
| Frequencies -- | 1472.8109 | 1482.8099 | 1488.7114 |
| Frequencies -- | 1491.7787 | 1493.3726 | 1494.1144 |
| Frequencies -- | 1498.4497 | 1500.7704 | 1503.1894 |
| Frequencies -- | 1506.1035 | 1507.6030 | 1510.4136 |
| Frequencies -- | 1511.1312 | 1512.4320 | 1515.7144 |
| Frequencies -- | 1528.0115 | 1594.5808 | 1596.5130 |
| Frequencies -- | 1598.5455 | 1604.3776 | 1606.9104 |
| Frequencies -- | 1617.3500 | 1620.2380 | 1622.4844 |
| Frequencies -- | 1823.1007 | 2952.4524 | 3008.0040 |
| Frequencies -- | 3010.2804 | 3011.4738 | 3012.8528 |
| Frequencies -- | 3013.9351 | 3019.5565 | 3035.9689 |
| Frequencies -- | 3047.9625 | 3095.3864 | 3096.0860 |
| Frequencies -- | 3097.2524 | 3099.0565 | 3099.8996 |
| Frequencies -- | 3103.0631 | 3107.7411 | 3127.6745 |
| Frequencies -- | 3131.9226 | 3139.0037 | 3140.4323 |
| Frequencies -- | 3142.2323 | 3147.6602 | 3148.2133 |
| Frequencies -- | 3160.1267 | 3163.9615 | 3172.3056 |
| Frequencies -- | 3175.1086 | 3195.6298 | 3197.1725 |

**Catalyst 11:**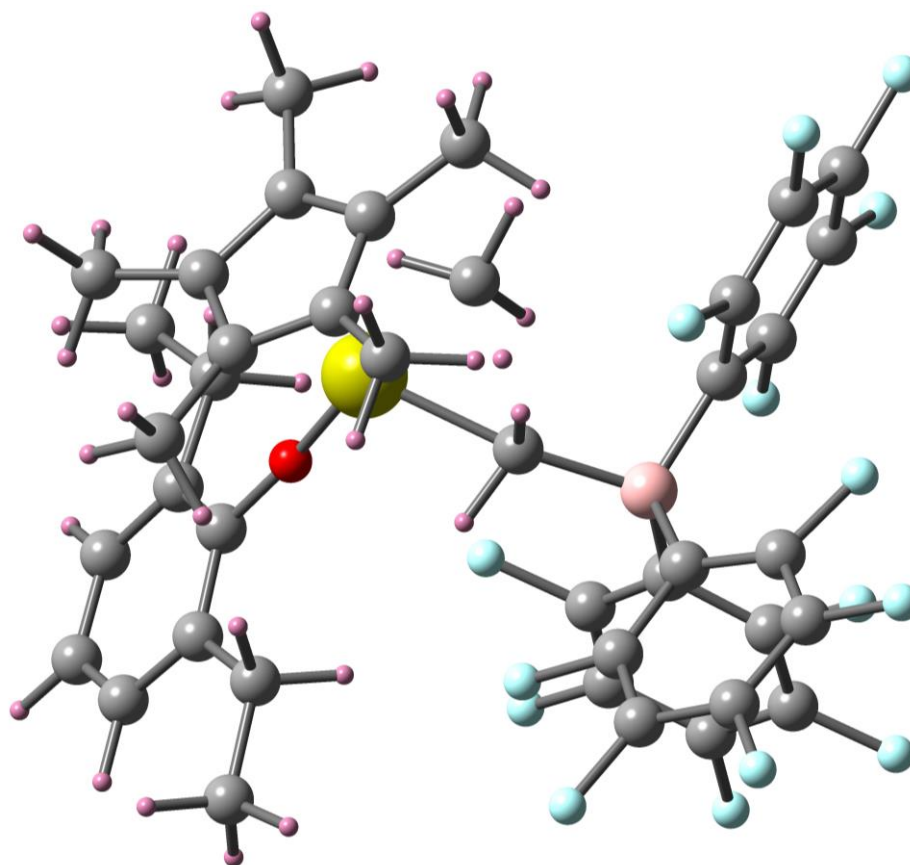

| vacuum        | toluene-like solvent | D3 dispersion |
|---------------|----------------------|---------------|
| -3199.5139592 | -3199.5248465        | -0.62981350   |

Imaginary frequency corresponding to vibration along the reaction coordinate:  $-964\text{ cm}^{-1}$ .

|    |             |             |             |
|----|-------------|-------------|-------------|
| Ti | -1.94129900 | 1.26592400  | 0.38725800  |
| C  | -1.23572900 | 1.78613200  | -1.78416600 |
| H  | -0.87137900 | 1.08101800  | -2.54434000 |
| H  | -2.30531100 | 1.93194000  | -1.98212600 |
| H  | -0.71707900 | 2.74463900  | -1.88778400 |
| O  | -3.08584000 | -0.04874700 | 0.02494300  |
| C  | -4.07283800 | -1.03127300 | -0.10007200 |
| C  | -4.10447100 | -2.10359500 | 0.84565000  |
| C  | -4.99547700 | -0.93027800 | -1.18663300 |
| C  | -5.15622000 | -3.04010100 | 0.72132800  |
| C  | -6.01417700 | -1.90707300 | -1.26476200 |
| C  | -6.10782900 | -2.94009800 | -0.31242700 |
| H  | -5.22807300 | -3.86382500 | 1.42941600  |
| H  | -6.73747700 | -1.86715700 | -2.07757500 |
| H  | -6.90865900 | -3.67843800 | -0.38717200 |
| C  | -1.59709100 | 2.77762600  | 2.30833700  |
| C  | -1.49453300 | 3.61966400  | 1.15088900  |
| C  | -2.93583300 | 2.20614600  | 2.33332400  |
| C  | -2.76826100 | 3.57639300  | 0.44957100  |
| C  | -3.66888400 | 2.73392100  | 1.20494300  |

|   |             |             |             |
|---|-------------|-------------|-------------|
| F | 1.26728000  | -5.34319900 | -3.11647100 |
| C | 1.29855400  | -4.12867400 | -2.44581400 |
| C | 2.52086600  | -3.55142300 | -2.06193200 |
| C | 0.11122100  | -3.44568800 | -2.14357100 |
| C | 2.52039000  | -2.32201400 | -1.37841300 |
| F | 3.71414900  | -4.19528200 | -2.36842000 |
| C | 0.17333900  | -2.21568800 | -1.45878400 |
| F | -1.11565900 | -3.98296900 | -2.52530600 |
| C | 1.35889700  | -1.59063100 | -1.02460100 |
| F | 3.78401300  | -1.80121600 | -1.07812200 |
| F | -1.07226900 | -1.60220000 | -1.24265000 |
| B | 1.48154500  | -0.17444100 | -0.14526800 |
| C | 2.38488100  | -0.61790000 | 1.21480000  |
| C | 2.17912700  | 1.05797900  | -1.03428600 |
| C | 0.02998800  | 0.46985000  | 0.45642200  |
| C | 3.73503600  | -0.28368200 | 1.48795900  |
| C | 1.82396800  | -1.45620400 | 2.20794900  |
| C | 2.33936300  | 1.06456000  | -2.43991400 |
| C | 2.61048100  | 2.26471000  | -0.43520500 |
| H | -0.54439400 | -0.35178600 | 0.93926400  |
| H | 0.35294500  | 1.21026100  | 1.20419500  |
| H | -0.57824000 | 1.15347300  | -0.82318100 |
| C | 4.43868100  | -0.68660100 | 2.64213200  |
| F | 4.48877300  | 0.46957200  | 0.58574600  |
| C | 2.47957700  | -1.88818100 | 3.37584200  |
| F | 0.51203900  | -1.95406000 | 2.05620400  |
| C | 2.91795400  | 2.12104800  | -3.17537400 |
| F | 1.88509100  | -0.00587900 | -3.22397000 |
| C | 3.18986000  | 3.34880800  | -1.11574700 |
| F | 2.47166200  | 2.44327700  | 0.95524000  |
| C | 3.80604500  | -1.49033300 | 3.60372400  |
| F | 5.76052800  | -0.30163000 | 2.83443600  |
| F | 1.82789800  | -2.70279300 | 4.29897100  |
| C | 3.35721800  | 3.27510500  | -2.50874600 |
| F | 3.04077100  | 2.03636100  | -4.55774900 |
| F | 3.58664600  | 4.49263100  | -0.42854400 |
| F | 4.47948200  | -1.89297900 | 4.74827100  |
| F | 3.92074900  | 4.33049200  | -3.21127200 |
| C | -3.00679200 | -2.24057400 | 1.90152500  |
| H | -2.04016600 | -2.27641600 | 1.37874800  |
| C | -4.83333900 | 0.15569900  | -2.25088800 |
| H | -3.92086000 | -0.07527000 | -2.82937900 |
| C | -3.08586600 | -3.45509500 | 2.85357200  |
| H | -3.88630500 | -3.34568300 | 3.60301900  |
| H | -3.25204400 | -4.39703100 | 2.31022100  |
| H | -2.13098000 | -3.55601400 | 3.39191700  |
| C | -6.00653800 | 0.33980200  | -3.24062100 |
| H | -6.96477000 | 0.49241900  | -2.71951900 |
| H | -5.82341100 | 1.22359900  | -3.87211400 |
| H | -6.11680500 | -0.52460300 | -3.91286000 |
| H | -4.63777600 | 1.11873000  | -1.75710700 |
| H | -2.97564000 | -1.32513000 | 2.51392600  |
| C | -0.57051700 | 2.63452400  | 3.41003800  |
| H | 0.45633900  | 2.53270200  | 3.03531000  |
| H | -0.59123100 | 3.53075300  | 4.05395300  |
| H | -0.77594100 | 1.76872300  | 4.05356800  |
| C | -0.33134800 | 4.52556100  | 0.81848500  |

|   |             |            |             |
|---|-------------|------------|-------------|
| H | -0.28929300 | 5.35524700 | 1.54534600  |
| H | 0.63503000  | 4.01398100 | 0.86879900  |
| H | -0.42811100 | 4.97608200 | -0.17747600 |
| C | -3.52433200 | 1.41181700 | 3.48015700  |
| H | -2.91597700 | 0.54005400 | 3.75933900  |
| H | -3.59991700 | 2.05103900 | 4.37589000  |
| H | -4.53310600 | 1.04925800 | 3.24761100  |
| C | -3.15297900 | 4.45955300 | -0.71692600 |
| H | -3.33159400 | 5.48856400 | -0.36091000 |
| H | -2.37082200 | 4.51941100 | -1.48506200 |
| H | -4.07635800 | 4.12270600 | -1.20573500 |
| C | -5.14919000 | 2.54892500 | 0.95757000  |
| H | -5.49416000 | 1.53593200 | 1.20194900  |
| H | -5.71868300 | 3.25170400 | 1.59045100  |
| H | -5.43176300 | 2.75355700 | -0.08274400 |

|                |           |          |          |
|----------------|-----------|----------|----------|
| Frequencies -- | -964.4268 | -20.0284 | 10.5592  |
| Frequencies -- | 21.0622   | 21.8799  | 23.8921  |
| Frequencies -- | 27.4868   | 28.6886  | 30.8361  |
| Frequencies -- | 32.6357   | 37.6437  | 38.0266  |
| Frequencies -- | 47.5817   | 48.4963  | 51.7017  |
| Frequencies -- | 55.3168   | 58.8523  | 64.4353  |
| Frequencies -- | 69.1843   | 84.1496  | 89.7997  |
| Frequencies -- | 97.1423   | 100.2247 | 110.4468 |
| Frequencies -- | 112.8397  | 114.3688 | 118.4455 |
| Frequencies -- | 122.9385  | 125.0501 | 128.3335 |
| Frequencies -- | 137.9610  | 141.9278 | 143.0653 |
| Frequencies -- | 144.9723  | 146.0254 | 155.6096 |
| Frequencies -- | 159.9685  | 160.9766 | 165.3882 |
| Frequencies -- | 168.1200  | 175.6453 | 176.1749 |
| Frequencies -- | 182.2536  | 189.2518 | 192.4583 |
| Frequencies -- | 199.1169  | 214.6253 | 218.4000 |
| Frequencies -- | 219.3669  | 223.7729 | 232.8033 |
| Frequencies -- | 238.3258  | 250.3749 | 264.2267 |
| Frequencies -- | 264.6809  | 265.2079 | 267.7314 |
| Frequencies -- | 274.8386  | 275.1506 | 275.7949 |
| Frequencies -- | 277.8474  | 284.7097 | 288.2491 |
| Frequencies -- | 291.3205  | 299.9798 | 301.8330 |
| Frequencies -- | 305.9479  | 306.8260 | 309.3072 |
| Frequencies -- | 324.6172  | 326.4288 | 328.7030 |
| Frequencies -- | 331.6879  | 334.7747 | 346.3892 |
| Frequencies -- | 361.1348  | 364.9962 | 372.4450 |
| Frequencies -- | 376.9251  | 378.0016 | 379.9880 |
| Frequencies -- | 380.8116  | 391.6540 | 392.2698 |
| Frequencies -- | 401.3903  | 431.0352 | 432.8013 |
| Frequencies -- | 434.5062  | 447.2021 | 456.7788 |
| Frequencies -- | 463.6758  | 472.0356 | 504.1485 |
| Frequencies -- | 528.9348  | 532.5360 | 533.0895 |
| Frequencies -- | 534.4165  | 539.1415 | 544.3974 |
| Frequencies -- | 547.7064  | 553.1125 | 556.9156 |
| Frequencies -- | 575.3659  | 578.3316 | 582.6939 |
| Frequencies -- | 592.8698  | 597.4856 | 601.2706 |
| Frequencies -- | 604.1350  | 619.3456 | 634.4576 |
| Frequencies -- | 635.8610  | 637.9314 | 640.5783 |
| Frequencies -- | 655.0830  | 670.0334 | 696.7760 |
| Frequencies -- | 713.5157  | 715.9607 | 721.2445 |
| Frequencies -- | 730.9265  | 732.5502 | 743.8859 |
| Frequencies -- | 746.3109  | 760.7987 | 768.5780 |
| Frequencies -- | 769.9631  | 792.3017 | 801.0368 |
| Frequencies -- | 803.5678  | 829.5256 | 839.0356 |
| Frequencies -- | 853.0874  | 867.1497 | 880.4713 |

|                |           |           |           |
|----------------|-----------|-----------|-----------|
| Frequencies -- | 888.4228  | 903.2839  | 912.1509  |
| Frequencies -- | 918.5909  | 919.6599  | 929.7318  |
| Frequencies -- | 964.8982  | 973.2711  | 990.2739  |
| Frequencies -- | 995.4602  | 1006.5060 | 1016.8604 |
| Frequencies -- | 1026.5509 | 1027.3324 | 1036.8665 |
| Frequencies -- | 1040.1204 | 1042.5732 | 1044.4636 |
| Frequencies -- | 1047.1603 | 1048.9654 | 1049.4992 |
| Frequencies -- | 1053.6584 | 1056.0893 | 1057.0519 |
| Frequencies -- | 1083.3405 | 1086.9689 | 1089.1345 |
| Frequencies -- | 1090.1988 | 1098.6546 | 1100.3321 |
| Frequencies -- | 1123.0575 | 1123.3712 | 1170.9443 |
| Frequencies -- | 1175.8183 | 1185.9653 | 1203.7537 |
| Frequencies -- | 1209.0673 | 1212.1891 | 1215.4539 |
| Frequencies -- | 1257.7412 | 1260.4962 | 1276.1175 |
| Frequencies -- | 1285.8253 | 1290.7115 | 1291.7525 |
| Frequencies -- | 1316.3601 | 1319.2883 | 1325.4363 |
| Frequencies -- | 1325.5890 | 1336.0162 | 1342.3613 |
| Frequencies -- | 1343.2676 | 1350.5808 | 1352.8851 |
| Frequencies -- | 1381.4420 | 1409.6251 | 1410.2560 |
| Frequencies -- | 1412.9214 | 1415.2024 | 1416.8845 |
| Frequencies -- | 1418.2039 | 1421.7747 | 1422.5806 |
| Frequencies -- | 1423.8109 | 1427.0312 | 1430.8778 |
| Frequencies -- | 1433.5409 | 1434.1829 | 1450.7129 |
| Frequencies -- | 1451.6756 | 1465.9598 | 1467.6720 |
| Frequencies -- | 1469.1955 | 1469.6174 | 1470.7565 |
| Frequencies -- | 1471.9777 | 1479.1500 | 1484.5103 |
| Frequencies -- | 1489.3145 | 1494.4438 | 1496.2049 |
| Frequencies -- | 1498.5406 | 1498.6360 | 1499.0509 |
| Frequencies -- | 1501.4587 | 1504.5878 | 1507.5247 |
| Frequencies -- | 1508.5126 | 1509.8499 | 1511.5535 |
| Frequencies -- | 1513.7617 | 1520.1611 | 1525.6482 |
| Frequencies -- | 1594.0378 | 1595.9931 | 1598.9458 |
| Frequencies -- | 1600.1069 | 1608.3348 | 1617.1980 |
| Frequencies -- | 1619.5259 | 1622.5356 | 1812.0635 |
| Frequencies -- | 2937.0717 | 3011.5757 | 3012.3364 |
| Frequencies -- | 3013.3969 | 3014.4695 | 3015.1639 |
| Frequencies -- | 3015.5969 | 3016.0023 | 3018.1598 |
| Frequencies -- | 3040.1632 | 3043.2601 | 3077.3418 |
| Frequencies -- | 3089.8531 | 3100.4290 | 3103.2826 |
| Frequencies -- | 3104.5305 | 3105.8330 | 3106.5975 |
| Frequencies -- | 3113.3565 | 3116.9507 | 3118.8928 |
| Frequencies -- | 3123.3424 | 3124.7179 | 3138.7934 |
| Frequencies -- | 3140.9663 | 3144.0160 | 3145.5916 |
| Frequencies -- | 3149.4470 | 3170.4427 | 3174.2074 |
| Frequencies -- | 3185.6139 | 3202.8782 | 3211.9442 |

**Catalyst 12:**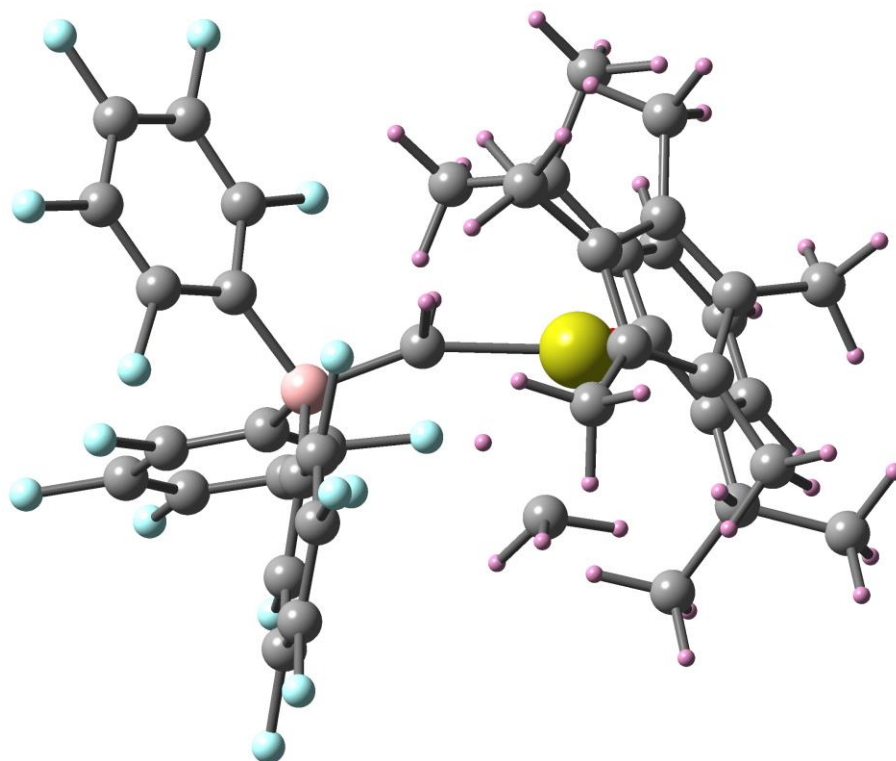

| <b>vacuum</b> | <b>toluene-like solvent</b> | <b>D3 dispersion</b> |
|---------------|-----------------------------|----------------------|
| -3278.0926055 | -3278.1031327               | -0.67102025          |

Imaginary frequency corresponding to vibration along the reaction coordinate:  $-1004 \text{ cm}^{-1}$ .

|    |             |             |             |
|----|-------------|-------------|-------------|
| Ti | -1.77183300 | 1.28680000  | 0.49032000  |
| C  | -1.08285100 | 1.86836700  | -1.67558700 |
| H  | -0.72742800 | 1.18575700  | -2.45976200 |
| H  | -2.14795900 | 2.03790100  | -1.87368000 |
| H  | -0.54953300 | 2.82070900  | -1.74419900 |
| O  | -2.98288300 | 0.02323400  | 0.13157200  |
| C  | -4.03103100 | -0.89575200 | -0.02844200 |
| C  | -4.12752000 | -2.01013900 | 0.86559200  |
| C  | -4.96155500 | -0.70039900 | -1.10156100 |
| C  | -5.20956200 | -2.90351700 | 0.67919100  |
| C  | -6.01272100 | -1.63639400 | -1.23531400 |
| C  | -6.14786500 | -2.72202900 | -0.35106000 |
| H  | -5.30819800 | -3.76241300 | 1.34311400  |
| H  | -6.73235000 | -1.51903800 | -2.04534500 |
| H  | -6.97022600 | -3.42939300 | -0.47427300 |
| C  | -1.20615800 | 2.87171600  | 2.32838800  |
| C  | -1.29617600 | 3.69144000  | 1.15638700  |
| C  | -2.49907300 | 2.23107700  | 2.52643300  |
| C  | -2.64902900 | 3.57579700  | 0.62710300  |
| C  | -3.40417600 | 2.71610900  | 1.50680100  |
| F  | 1.25802100  | -5.26808300 | -3.28125200 |
| C  | 1.32598900  | -4.07409000 | -2.57755700 |

|   |             |             |             |
|---|-------------|-------------|-------------|
| C | 2.56336700  | -3.55535600 | -2.15990500 |
| C | 0.16179800  | -3.35268700 | -2.27498800 |
| C | 2.59988400  | -2.34570400 | -1.44250900 |
| F | 3.73557200  | -4.23605400 | -2.46754300 |
| C | 0.26059100  | -2.14506600 | -1.55601600 |
| F | -1.08000300 | -3.83092300 | -2.68718900 |
| C | 1.46207200  | -1.58034000 | -1.08380400 |
| F | 3.87870800  | -1.88079300 | -1.11687200 |
| F | -0.96639300 | -1.49077900 | -1.34412000 |
| B | 1.61817800  | -0.19168300 | -0.16836600 |
| C | 2.55500500  | -0.65629000 | 1.15942000  |
| C | 2.29625800  | 1.06595800  | -1.03670000 |
| C | 0.17097300  | 0.41701300  | 0.48068100  |
| C | 3.90856400  | -0.31626200 | 1.40474200  |
| C | 2.02129200  | -1.50753800 | 2.15585200  |
| C | 2.47853200  | 1.10101700  | -2.43879600 |
| C | 2.68964300  | 2.27067400  | -0.40863300 |
| H | -0.41148100 | -0.43881500 | 0.88327800  |
| H | 0.49575000  | 1.09362800  | 1.28676500  |
| H | -0.43182500 | 1.17676100  | -0.73992700 |
| C | 4.64221900  | -0.72878800 | 2.53625900  |
| F | 4.63467800  | 0.45359400  | 0.49315200  |
| C | 2.70781900  | -1.95090500 | 3.30162800  |
| F | 0.70680100  | -2.00356000 | 2.03146800  |
| C | 3.03589900  | 2.18817800  | -3.14604900 |
| F | 2.07380000  | 0.03005900  | -3.24801400 |
| C | 3.24477500  | 3.38399900  | -1.06030400 |
| F | 2.54118700  | 2.40740600  | 0.98477300  |
| C | 4.03734400  | -1.54872900 | 3.50220800  |
| F | 5.96599900  | -0.33787800 | 2.70189600  |
| F | 2.08227000  | -2.77900500 | 4.23097700  |
| C | 3.43061500  | 3.34237900  | -2.45231300 |
| F | 3.18229200  | 2.13266800  | -4.52754900 |
| F | 3.60006300  | 4.52523000  | -0.34533600 |
| F | 4.74044900  | -1.96198000 | 4.62498000  |
| F | 3.97104500  | 4.42759300  | -3.12721600 |
| C | -3.09516900 | -2.31488300 | 1.96252500  |
| H | -2.37932900 | -1.48365000 | 2.01004500  |
| C | -4.81121400 | 0.42790100  | -2.13294500 |
| H | -4.12925900 | 1.17781400  | -1.71295400 |
| C | -2.28168200 | -3.59695200 | 1.61038500  |
| H | -2.92606100 | -4.48913200 | 1.60794500  |
| H | -1.81921400 | -3.51305600 | 0.61777200  |
| H | -1.48196000 | -3.75424800 | 2.34940500  |
| C | -3.73977900 | -2.45199200 | 3.37262600  |
| H | -4.34660100 | -1.57163400 | 3.63281000  |
| H | -4.39146000 | -3.33593700 | 3.43931300  |
| H | -2.95313900 | -2.56649100 | 4.13541200  |
| C | -4.15553200 | -0.11548400 | -3.43969400 |
| H | -4.80666400 | -0.85640100 | -3.92829100 |
| H | -3.98031500 | 0.70483500  | -4.15496500 |
| H | -3.19306700 | -0.60376500 | -3.23007800 |
| C | -6.14366900 | 1.16424000  | -2.44901300 |
| H | -6.85768300 | 0.52065500  | -2.98353600 |
| H | -6.63675400 | 1.52244700  | -1.53192200 |
| H | -5.94589400 | 2.03394600  | -3.09657700 |
| C | -0.05212400 | 2.79235300  | 3.30213700  |



|   |             |            |             |
|---|-------------|------------|-------------|
| H | 0.90177300  | 3.08739800 | 2.85216700  |
| H | -0.24070200 | 3.47277000 | 4.15068500  |
| H | 0.07408500  | 1.78485000 | 3.72499100  |
| C | -0.24951700 | 4.65904700 | 0.65542400  |
| H | -0.47380500 | 5.67009300 | 1.03888900  |
| H | 0.75852400  | 4.40149200 | 0.99535700  |
| H | -0.22996200 | 4.73770000 | -0.44004900 |
| C | -2.88739200 | 1.42144700 | 3.74324900  |
| H | -3.79178800 | 0.82636600 | 3.57250800  |
| H | -2.09025900 | 0.73907300 | 4.07042100  |
| H | -3.09594400 | 2.09899200 | 4.58977100  |
| C | -3.21427900 | 4.41313000 | -0.49836600 |
| H | -3.55223400 | 5.38740700 | -0.10427700 |
| H | -2.47112200 | 4.62543500 | -1.27821100 |
| H | -4.08252000 | 3.94266400 | -0.97949500 |
| C | -4.89476800 | 2.47193400 | 1.46763300  |
| H | -5.16096600 | 1.43730300 | 1.71929900  |
| H | -5.39299700 | 3.12731900 | 2.20326400  |
| H | -5.32811300 | 2.69928200 | 0.48651500  |

|                |            |          |          |
|----------------|------------|----------|----------|
| Frequencies -- | -1003.5556 | 8.7910   | 16.9401  |
| Frequencies -- | 21.9826    | 25.8498  | 27.7320  |
| Frequencies -- | 28.6757    | 31.4973  | 33.1993  |
| Frequencies -- | 37.2767    | 39.8486  | 43.8587  |
| Frequencies -- | 47.7517    | 56.3308  | 60.1464  |
| Frequencies -- | 71.4162    | 74.6030  | 85.2222  |
| Frequencies -- | 90.9131    | 101.8975 | 105.5377 |
| Frequencies -- | 110.0374   | 113.3897 | 114.7684 |
| Frequencies -- | 120.4980   | 121.6634 | 124.6409 |
| Frequencies -- | 126.6670   | 136.5813 | 138.9770 |
| Frequencies -- | 141.8379   | 145.0080 | 146.4505 |
| Frequencies -- | 150.9905   | 153.2829 | 156.3304 |
| Frequencies -- | 158.7998   | 159.3196 | 162.1151 |
| Frequencies -- | 164.3657   | 166.3409 | 170.0736 |
| Frequencies -- | 173.6520   | 185.7713 | 189.7602 |
| Frequencies -- | 200.6134   | 206.3997 | 214.8325 |
| Frequencies -- | 216.6198   | 219.4850 | 219.8663 |
| Frequencies -- | 223.0639   | 225.6847 | 235.3282 |
| Frequencies -- | 241.7800   | 253.4445 | 259.8760 |
| Frequencies -- | 264.2311   | 264.2655 | 265.0131 |
| Frequencies -- | 274.8493   | 275.4116 | 276.6987 |
| Frequencies -- | 277.4162   | 286.6715 | 287.9744 |
| Frequencies -- | 292.6773   | 300.8716 | 302.3503 |
| Frequencies -- | 302.7090   | 303.0415 | 304.3691 |
| Frequencies -- | 307.4341   | 314.6397 | 321.7397 |
| Frequencies -- | 326.5502   | 328.5677 | 335.0243 |
| Frequencies -- | 342.4993   | 362.5878 | 370.9472 |
| Frequencies -- | 373.4475   | 377.0910 | 377.9527 |
| Frequencies -- | 380.9955   | 388.6068 | 396.5781 |
| Frequencies -- | 399.8829   | 424.3932 | 426.8886 |
| Frequencies -- | 431.4969   | 432.6737 | 434.0748 |
| Frequencies -- | 439.6713   | 448.3259 | 456.8085 |
| Frequencies -- | 463.7965   | 475.4064 | 527.7731 |
| Frequencies -- | 532.8219   | 534.3617 | 536.1288 |
| Frequencies -- | 539.1476   | 543.4972 | 545.7078 |
| Frequencies -- | 552.2389   | 554.8875 | 575.9102 |
| Frequencies -- | 584.6738   | 593.2211 | 596.1656 |
| Frequencies -- | 598.9202   | 607.2530 | 609.1707 |
| Frequencies -- | 617.3151   | 629.7137 | 634.7475 |
| Frequencies -- | 635.8497   | 638.2240 | 641.7123 |
| Frequencies -- | 654.7302   | 671.6613 | 701.1640 |

|                |           |           |           |
|----------------|-----------|-----------|-----------|
| Frequencies -- | 715.4303  | 721.2316  | 723.8190  |
| Frequencies -- | 732.5781  | 743.7098  | 746.5772  |
| Frequencies -- | 760.4096  | 760.8919  | 768.7364  |
| Frequencies -- | 797.8189  | 801.5474  | 803.6225  |
| Frequencies -- | 815.0289  | 842.0072  | 867.2112  |
| Frequencies -- | 875.6209  | 878.6805  | 879.4239  |
| Frequencies -- | 903.4074  | 911.8735  | 917.0493  |
| Frequencies -- | 922.1889  | 927.0241  | 929.6996  |
| Frequencies -- | 932.8972  | 940.8572  | 963.3118  |
| Frequencies -- | 964.6027  | 968.0122  | 973.9921  |
| Frequencies -- | 990.7420  | 1002.0565 | 1016.8772 |
| Frequencies -- | 1026.5953 | 1037.9658 | 1040.2255 |
| Frequencies -- | 1042.4370 | 1044.5764 | 1046.1821 |
| Frequencies -- | 1049.1120 | 1049.5013 | 1053.1309 |
| Frequencies -- | 1055.3856 | 1056.4417 | 1072.3966 |
| Frequencies -- | 1084.0347 | 1087.4104 | 1090.4578 |
| Frequencies -- | 1111.1867 | 1113.6133 | 1120.7786 |
| Frequencies -- | 1125.8026 | 1165.9647 | 1172.6464 |
| Frequencies -- | 1174.5195 | 1182.1306 | 1184.7318 |
| Frequencies -- | 1206.3860 | 1209.6262 | 1212.2868 |
| Frequencies -- | 1215.0940 | 1252.1343 | 1260.2172 |
| Frequencies -- | 1278.2823 | 1290.9362 | 1303.5499 |
| Frequencies -- | 1316.9882 | 1317.9390 | 1320.0505 |
| Frequencies -- | 1322.1619 | 1325.6220 | 1332.8541 |
| Frequencies -- | 1337.1473 | 1343.5482 | 1347.8313 |
| Frequencies -- | 1350.0941 | 1377.7284 | 1401.2929 |
| Frequencies -- | 1401.3803 | 1407.9399 | 1411.1182 |
| Frequencies -- | 1414.4177 | 1418.2420 | 1419.9972 |
| Frequencies -- | 1420.2406 | 1421.8909 | 1422.7185 |
| Frequencies -- | 1426.5892 | 1427.4143 | 1429.7644 |
| Frequencies -- | 1435.1120 | 1436.1923 | 1450.2437 |
| Frequencies -- | 1453.4494 | 1467.1494 | 1467.8023 |
| Frequencies -- | 1468.8114 | 1471.8608 | 1472.3378 |
| Frequencies -- | 1474.4907 | 1482.7807 | 1485.4629 |
| Frequencies -- | 1486.8946 | 1488.2664 | 1491.0394 |
| Frequencies -- | 1492.2013 | 1495.9680 | 1499.1425 |
| Frequencies -- | 1500.7767 | 1502.0466 | 1504.6825 |
| Frequencies -- | 1507.3567 | 1508.3709 | 1508.8356 |
| Frequencies -- | 1511.2417 | 1513.0130 | 1518.1364 |
| Frequencies -- | 1520.1064 | 1528.8359 | 1594.4336 |
| Frequencies -- | 1596.3531 | 1597.3963 | 1598.5451 |
| Frequencies -- | 1606.5071 | 1617.6004 | 1619.9425 |
| Frequencies -- | 1622.4460 | 1816.6225 | 2953.6835 |
| Frequencies -- | 3008.9775 | 3009.7997 | 3010.7922 |
| Frequencies -- | 3013.2516 | 3013.3121 | 3014.0170 |
| Frequencies -- | 3014.6132 | 3015.2669 | 3025.5432 |
| Frequencies -- | 3052.1174 | 3080.5576 | 3086.4325 |
| Frequencies -- | 3096.3343 | 3099.1729 | 3100.4551 |
| Frequencies -- | 3103.0417 | 3104.3884 | 3106.8376 |
| Frequencies -- | 3111.5316 | 3113.6960 | 3114.5792 |
| Frequencies -- | 3121.4197 | 3125.7389 | 3131.1065 |
| Frequencies -- | 3135.0019 | 3139.4041 | 3145.5960 |
| Frequencies -- | 3153.6692 | 3154.2546 | 3161.1323 |
| Frequencies -- | 3163.1694 | 3166.9796 | 3173.0418 |
| Frequencies -- | 3190.1629 | 3198.8361 | 3202.4028 |

**Catalyst 13:****distal conformation**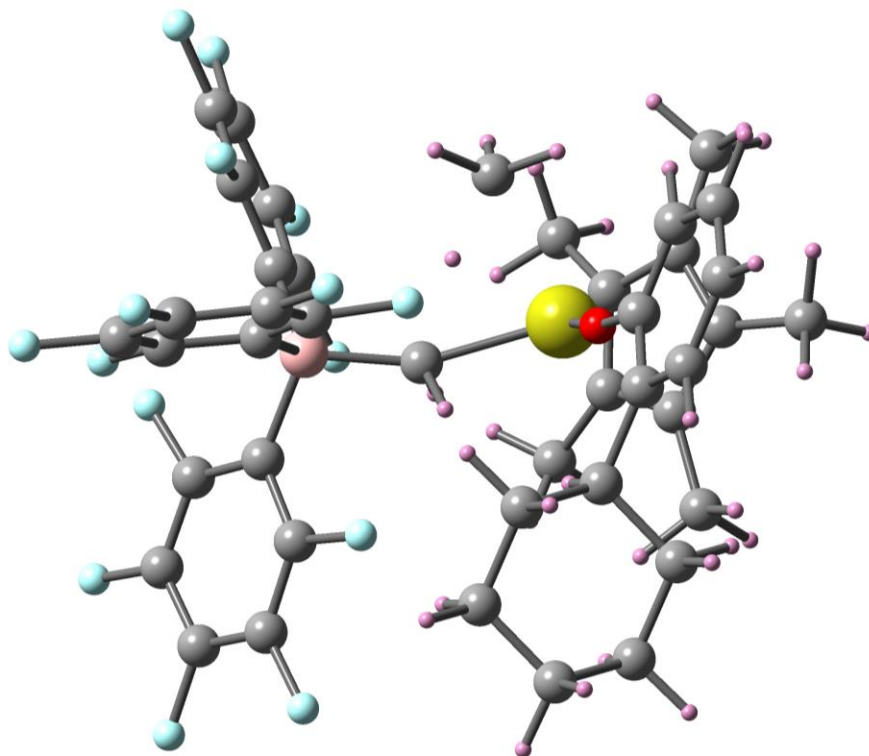

| vacuum        | toluene-like solvent | D3 dispersion |
|---------------|----------------------|---------------|
| -3276.8990185 | -3276.9103375        | -0.65947011   |

Imaginary frequency corresponding to vibration along the reaction coordinate:  $-1021 \text{ cm}^{-1}$ .

|    |             |             |             |
|----|-------------|-------------|-------------|
| Ti | -1.43079200 | 1.90295700  | 0.18976100  |
| C  | -0.33835000 | 2.43204600  | -1.80468000 |
| H  | 0.03473000  | 1.75665100  | -2.58810700 |
| H  | -1.31672700 | 2.78924300  | -2.15383500 |
| H  | 0.34552500  | 3.27874800  | -1.69638100 |
| O  | -2.80445000 | 1.03718200  | -0.53777300 |
| C  | -3.95654100 | 0.64036600  | -1.21564600 |
| C  | -4.69238500 | -0.51488600 | -0.81793800 |
| C  | -4.34891600 | 1.42493200  | -2.33049000 |
| C  | -5.84882700 | -0.81779200 | -1.58470200 |
| C  | -5.49467000 | 1.08751500  | -3.06969100 |
| C  | -6.25332200 | -0.04100800 | -2.68741100 |
| H  | -6.44244400 | -1.69241600 | -1.31632600 |
| H  | -5.78652000 | 1.69133000  | -3.93123300 |
| H  | -7.14686800 | -0.31850100 | -3.24982200 |
| C  | -0.88675100 | 3.15085900  | 2.25520200  |
| C  | -0.58000000 | 4.05177400  | 1.18327800  |
| C  | -2.30434400 | 2.82388300  | 2.17383100  |
| C  | -1.81044100 | 4.30767400  | 0.44360900  |
| C  | -2.88282100 | 3.59256300  | 1.09168500  |
| F  | 0.60817500  | -4.84643000 | -3.94071400 |

|   |             |             |             |
|---|-------------|-------------|-------------|
| C | 0.81641700  | -3.77836100 | -3.07958400 |
| C | 2.05178800  | -3.60884500 | -2.43148100 |
| C | -0.19879000 | -2.83984300 | -2.84302900 |
| C | 2.23067300  | -2.52007700 | -1.55905300 |
| F | 3.08247300  | -4.51182300 | -2.66511800 |
| C | 0.03874600  | -1.76613100 | -1.96203400 |
| F | -1.43070100 | -2.97413100 | -3.47929400 |
| C | 1.24247700  | -1.54862900 | -1.26192900 |
| F | 3.50578300  | -2.40477000 | -0.99397000 |
| F | -1.03535200 | -0.86853300 | -1.83017600 |
| B | 1.54670600  | -0.34079000 | -0.15084800 |
| C | 2.06195200  | -1.16413100 | 1.23107400  |
| C | 2.65346000  | 0.77873200  | -0.71031800 |
| C | 0.19562800  | 0.56086500  | 0.33118500  |
| C | 3.37800100  | -1.21260800 | 1.75339600  |
| C | 1.15134500  | -1.94873600 | 1.97838000  |
| C | 3.08605600  | 0.91431600  | -2.05012200 |
| C | 3.20142300  | 1.76809000  | 0.13917300  |
| H | -0.63835400 | -0.14390100 | 0.53878100  |
| H | 0.52257200  | 1.07655500  | 1.25038100  |
| H | -0.00525100 | 1.52368700  | -0.87488500 |
| C | 3.74742100  | -1.91769400 | 2.91775300  |
| F | 4.43255200  | -0.56182700 | 1.10942800  |
| C | 1.46639500  | -2.67405600 | 3.14235100  |
| F | -0.18994500 | -2.07061200 | 1.55555800  |
| C | 4.00697600  | 1.88557900  | -2.49875500 |
| F | 2.58285300  | 0.08175900  | -3.05974300 |
| C | 4.11616400  | 2.75950600  | -0.25155500 |
| F | 2.82932700  | 1.79955900  | 1.49692500  |
| C | 2.78346400  | -2.65157800 | 3.62746900  |
| F | 5.06249800  | -1.89992000 | 3.36781500  |
| F | 0.48925200  | -3.40745100 | 3.81140300  |
| C | 4.53633400  | 2.81588700  | -1.59108400 |
| F | 4.38049300  | 1.94116100  | -3.83675800 |
| F | 4.59609600  | 3.68909300  | 0.66774600  |
| F | 3.12611300  | -3.34794300 | 4.77788200  |
| F | 5.43457600  | 3.78650900  | -2.01087000 |
| C | -1.96675000 | 5.33225000  | -0.65812900 |
| H | -2.11521800 | 6.33420400  | -0.21920500 |
| H | -1.08093900 | 5.39462300  | -1.30394800 |
| H | -2.83667300 | 5.13037800  | -1.29811700 |
| C | 0.73171300  | 4.76725700  | 0.95750000  |
| H | 0.96507100  | 4.90530900  | -0.10728100 |
| H | 0.67881500  | 5.77696200  | 1.40125900  |
| H | 1.57699400  | 4.25249800  | 1.42598100  |
| C | 0.03107700  | 2.72042400  | 3.37738100  |
| H | 1.09045000  | 2.80677000  | 3.11330700  |
| H | -0.14244800 | 3.36150400  | 4.25905700  |
| H | -0.15069800 | 1.68417700  | 3.69781100  |
| C | -3.06645300 | 2.00515000  | 3.19314600  |
| H | -2.48884500 | 1.14353200  | 3.55788600  |
| H | -3.30245400 | 2.62749000  | 4.07408600  |
| H | -4.01768500 | 1.62781900  | 2.79733200  |
| C | -4.35777700 | 3.71720500  | 0.78816000  |
| H | -4.90861900 | 2.78885600  | 0.98547600  |
| H | -4.79792600 | 4.50132700  | 1.42903000  |
| H | -4.55313200 | 4.00222300  | -0.25310900 |

|   |             |             |             |
|---|-------------|-------------|-------------|
| H | -3.74538200 | 2.28680900  | -2.61448900 |
| C | -4.27610900 | -1.41058600 | 0.35234800  |
| C | -5.33988900 | -1.42759200 | 1.49623000  |
| C | -3.96544900 | -2.87006200 | -0.11236800 |
| H | -3.34553900 | -1.00796700 | 0.77941900  |
| C | -4.89844700 | -2.32712600 | 2.67884800  |
| H | -6.30169100 | -1.79815600 | 1.10243600  |
| H | -5.52419800 | -0.39896400 | 1.85150700  |
| C | -3.53010800 | -3.76967900 | 1.07151700  |
| H | -4.86181600 | -3.30617300 | -0.58506200 |
| H | -3.18040200 | -2.85075500 | -0.88375400 |
| C | -4.57631200 | -3.76845300 | 2.21308400  |
| H | -5.69227300 | -2.34303100 | 3.44554500  |
| H | -4.00257600 | -1.89289700 | 3.15957900  |
| H | -3.37174400 | -4.79897700 | 0.70698400  |
| H | -2.55911200 | -3.42290700 | 1.46342100  |
| H | -4.20610800 | -4.36473600 | 3.06398300  |
| H | -5.50510400 | -4.25563100 | 1.86334000  |

|                |            |          |          |
|----------------|------------|----------|----------|
| Frequencies -- | -1021.4003 | 12.2101  | 19.4789  |
| Frequencies -- | 23.7853    | 26.1487  | 28.0241  |
| Frequencies -- | 29.6422    | 30.8264  | 33.4551  |
| Frequencies -- | 38.1766    | 42.1191  | 43.7809  |
| Frequencies -- | 49.5644    | 50.9357  | 58.8458  |
| Frequencies -- | 69.0879    | 79.3823  | 87.8717  |
| Frequencies -- | 101.7283   | 104.5874 | 109.1527 |
| Frequencies -- | 111.2659   | 115.2123 | 120.1342 |
| Frequencies -- | 120.8873   | 124.8435 | 127.6980 |
| Frequencies -- | 137.5704   | 142.0671 | 142.6096 |
| Frequencies -- | 144.9491   | 145.7341 | 146.7762 |
| Frequencies -- | 156.0498   | 158.8021 | 160.8756 |
| Frequencies -- | 161.3403   | 164.2329 | 169.2579 |
| Frequencies -- | 171.1460   | 173.2808 | 176.7278 |
| Frequencies -- | 186.6572   | 189.2677 | 200.1506 |
| Frequencies -- | 215.8777   | 218.0915 | 222.1099 |
| Frequencies -- | 223.7297   | 229.3232 | 232.9309 |
| Frequencies -- | 246.8624   | 263.8137 | 264.1884 |
| Frequencies -- | 264.6430   | 264.8602 | 274.6202 |
| Frequencies -- | 275.3543   | 276.2423 | 283.0487 |
| Frequencies -- | 287.1877   | 291.8344 | 300.7915 |
| Frequencies -- | 302.1873   | 303.3541 | 303.9985 |
| Frequencies -- | 308.3065   | 311.3329 | 324.9909 |
| Frequencies -- | 326.9249   | 331.6754 | 336.4709 |
| Frequencies -- | 344.4117   | 357.4530 | 364.6660 |
| Frequencies -- | 373.3149   | 377.6827 | 378.4220 |
| Frequencies -- | 380.0548   | 381.3654 | 393.2110 |
| Frequencies -- | 401.7537   | 402.6151 | 431.8652 |
| Frequencies -- | 432.6524   | 434.2423 | 435.7680 |
| Frequencies -- | 440.2433   | 449.3041 | 456.9549 |
| Frequencies -- | 463.9548   | 476.8795 | 494.5716 |
| Frequencies -- | 501.5569   | 518.7084 | 531.2864 |
| Frequencies -- | 533.6103   | 535.2627 | 538.4713 |
| Frequencies -- | 545.0354   | 552.2919 | 555.3598 |
| Frequencies -- | 556.1864   | 573.9097 | 582.7102 |
| Frequencies -- | 594.1687   | 599.7141 | 605.2080 |
| Frequencies -- | 612.0250   | 618.9234 | 634.4107 |
| Frequencies -- | 636.4573   | 638.2082 | 642.7365 |
| Frequencies -- | 654.2962   | 667.7319 | 674.3730 |
| Frequencies -- | 698.6855   | 717.9869 | 723.0268 |
| Frequencies -- | 733.1057   | 742.0978 | 745.2214 |
| Frequencies -- | 747.4525   | 761.7047 | 763.3141 |

|                |           |           |           |
|----------------|-----------|-----------|-----------|
| Frequencies -- | 769.1548  | 770.6126  | 790.9547  |
| Frequencies -- | 801.6212  | 802.4928  | 821.2335  |
| Frequencies -- | 843.8691  | 864.0701  | 868.2544  |
| Frequencies -- | 869.7233  | 879.4918  | 883.5079  |
| Frequencies -- | 891.0555  | 901.8980  | 903.6634  |
| Frequencies -- | 912.5340  | 918.6350  | 923.8807  |
| Frequencies -- | 938.1268  | 954.9604  | 969.1016  |
| Frequencies -- | 971.5801  | 991.3639  | 999.1811  |
| Frequencies -- | 1003.8497 | 1018.0301 | 1027.6207 |
| Frequencies -- | 1038.6928 | 1040.6737 | 1043.3002 |
| Frequencies -- | 1043.6387 | 1048.1536 | 1049.5371 |
| Frequencies -- | 1050.5531 | 1053.2311 | 1054.3655 |
| Frequencies -- | 1055.4111 | 1056.3321 | 1057.2338 |
| Frequencies -- | 1086.7578 | 1087.6014 | 1089.0989 |
| Frequencies -- | 1091.7617 | 1095.6373 | 1116.3785 |
| Frequencies -- | 1125.2838 | 1153.1838 | 1170.8801 |
| Frequencies -- | 1174.4705 | 1181.4209 | 1191.4704 |
| Frequencies -- | 1197.9468 | 1209.6808 | 1212.8581 |
| Frequencies -- | 1215.4609 | 1221.9471 | 1249.2797 |
| Frequencies -- | 1266.7605 | 1276.6777 | 1283.9692 |
| Frequencies -- | 1293.3922 | 1299.3316 | 1316.8378 |
| Frequencies -- | 1317.9566 | 1320.3267 | 1326.0808 |
| Frequencies -- | 1327.4103 | 1337.6519 | 1343.9043 |
| Frequencies -- | 1348.8768 | 1349.4720 | 1353.7011 |
| Frequencies -- | 1357.0835 | 1360.1563 | 1365.5709 |
| Frequencies -- | 1372.2668 | 1386.7016 | 1408.7725 |
| Frequencies -- | 1411.3301 | 1412.8239 | 1419.1873 |
| Frequencies -- | 1421.8573 | 1424.4409 | 1425.9492 |
| Frequencies -- | 1428.8698 | 1430.7084 | 1436.6919 |
| Frequencies -- | 1445.4411 | 1448.6354 | 1454.2555 |
| Frequencies -- | 1466.2305 | 1467.4004 | 1468.0713 |
| Frequencies -- | 1469.6727 | 1471.6953 | 1482.1959 |
| Frequencies -- | 1483.0551 | 1484.2664 | 1485.2166 |
| Frequencies -- | 1487.1475 | 1491.0727 | 1493.0796 |
| Frequencies -- | 1494.5084 | 1499.8262 | 1500.7555 |
| Frequencies -- | 1501.1512 | 1501.6935 | 1507.8071 |
| Frequencies -- | 1509.8610 | 1512.1736 | 1517.9781 |
| Frequencies -- | 1529.0028 | 1586.8585 | 1594.2498 |
| Frequencies -- | 1596.2178 | 1598.4762 | 1613.7302 |
| Frequencies -- | 1617.4543 | 1620.5364 | 1622.9558 |
| Frequencies -- | 1827.8962 | 2945.0216 | 2998.1677 |
| Frequencies -- | 3002.2213 | 3008.2176 | 3010.4949 |
| Frequencies -- | 3011.1843 | 3012.1009 | 3013.3553 |
| Frequencies -- | 3014.3113 | 3019.6838 | 3026.6800 |
| Frequencies -- | 3041.7534 | 3054.2582 | 3061.1608 |
| Frequencies -- | 3069.3576 | 3078.7233 | 3079.7762 |
| Frequencies -- | 3086.2052 | 3095.5243 | 3098.9490 |
| Frequencies -- | 3099.0990 | 3101.6203 | 3104.7295 |
| Frequencies -- | 3107.9595 | 3136.5250 | 3137.5998 |
| Frequencies -- | 3142.6220 | 3152.4015 | 3162.5903 |
| Frequencies -- | 3165.4813 | 3170.5246 | 3178.3893 |
| Frequencies -- | 3192.6391 | 3197.5596 | 3204.7723 |

**proximal conformation**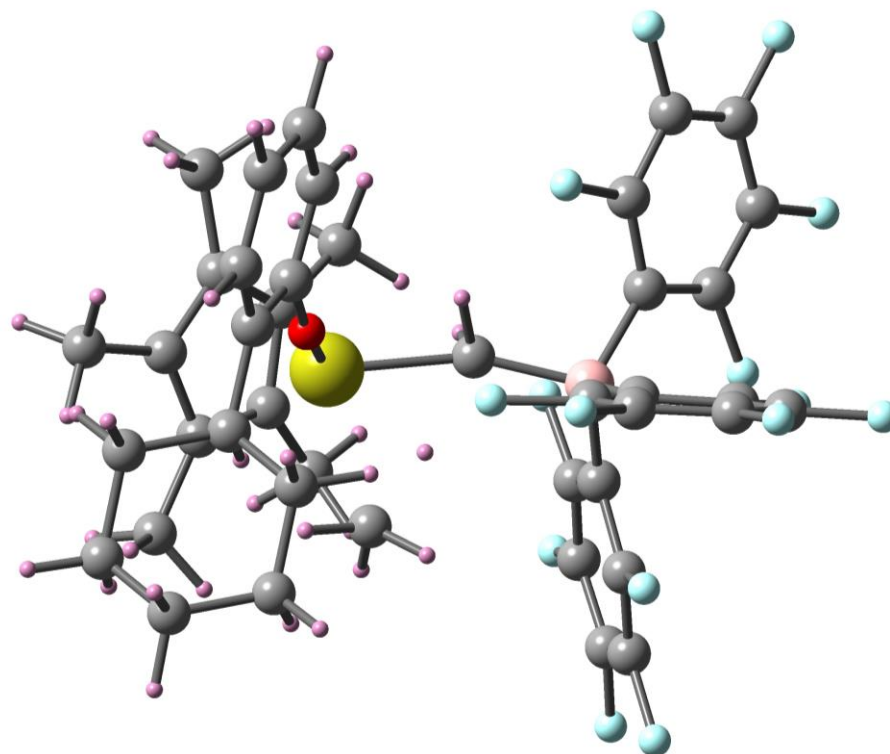

| <b>vacuum</b> | <b>toluene-like solvent</b> | <b>D3 dispersion</b> |
|---------------|-----------------------------|----------------------|
| -3276.8989632 | -3276.9102304               | -0.65858911          |

Imaginary frequency corresponding to vibration along the reaction coordinate:  $-1033 \text{ cm}^{-1}$ .

|    |             |             |             |
|----|-------------|-------------|-------------|
| Ti | 1.50050600  | -1.48587800 | 0.62261300  |
| C  | 1.34058800  | -1.32810500 | -1.69092600 |
| H  | 1.06245700  | -0.46691300 | -2.31477100 |
| H  | 2.43999900  | -1.35520100 | -1.68032200 |
| H  | 0.95684900  | -2.24586800 | -2.14557500 |
| O  | 2.66611200  | -0.18603900 | 0.96992800  |
| C  | 3.47887700  | 0.78702400  | 1.55001700  |
| C  | 3.09540200  | 1.27857400  | 2.82374400  |
| C  | 4.62677300  | 1.28562500  | 0.86663600  |
| C  | 3.86567300  | 2.26687100  | 3.45958500  |
| C  | 5.37961400  | 2.28126000  | 1.54220900  |
| C  | 5.01945400  | 2.76629300  | 2.81498100  |
| H  | 3.56317400  | 2.64775000  | 4.43690900  |
| H  | 6.26324500  | 2.69415700  | 1.05400300  |
| H  | 5.62562400  | 3.53686900  | 3.29510400  |
| C  | 0.70287400  | -3.44397000 | 1.89853500  |
| C  | 0.87099300  | -3.92421600 | 0.55678900  |
| C  | 1.99930000  | -2.97990300 | 2.37736400  |
| C  | 2.27211200  | -3.76674400 | 0.19631400  |
| C  | 2.97434100  | -3.22984400 | 1.33988300  |
| F  | -0.77531500 | 5.94490100  | -1.82577800 |
| C  | -0.96888300 | 4.62133000  | -1.45665000 |
| C  | -2.26213500 | 4.07490200  | -1.39351900 |
| C  | 0.12266100  | 3.79590600  | -1.14895500 |

|   |             |             |             |
|---|-------------|-------------|-------------|
| C | -2.42645000 | 2.73041200  | -1.01393700 |
| F | -3.36057400 | 4.86364500  | -1.71529200 |
| C | -0.10291900 | 2.45638000  | -0.77519100 |
| F | 1.41904700  | 4.30182400  | -1.22276300 |
| C | -1.37037100 | 1.84971000  | -0.67138200 |
| F | -3.74350800 | 2.25836800  | -1.02600000 |
| F | 1.06382400  | 1.71247100  | -0.52904900 |
| B | -1.69467500 | 0.29241600  | -0.16393200 |
| C | -2.79015100 | 0.49014600  | 1.10621400  |
| C | -2.26283600 | -0.68007000 | -1.39761600 |
| C | -0.38964200 | -0.55671400 | 0.49787700  |
| C | -4.17438600 | 0.18968500  | 1.08552100  |
| C | -2.37180400 | 1.04932700  | 2.33803300  |
| C | -2.20678500 | -0.37893900 | -2.77839800 |
| C | -2.78367600 | -1.97111400 | -1.14391000 |
| H | 0.11282600  | 0.10986100  | 1.23197400  |
| H | -0.85329000 | -1.42301600 | 0.99680500  |
| H | 0.45743000  | -0.93158800 | -0.75904400 |
| C | -5.04629500 | 0.37427400  | 2.17856400  |
| F | -4.78610100 | -0.30204400 | -0.06965200 |
| C | -3.19883500 | 1.25561200  | 3.45809100  |
| F | -1.03636100 | 1.47481500  | 2.50856200  |
| C | -2.66719500 | -1.23440200 | -3.80258800 |
| F | -1.64196100 | 0.82079300  | -3.23397100 |
| C | -3.25371100 | -2.86389000 | -2.12089200 |
| F | -2.85858800 | -2.44094400 | 0.18153900  |
| C | -4.55603900 | 0.90515100  | 3.38228000  |
| F | -6.39221900 | 0.04245100  | 2.07399400  |
| F | -2.68554100 | 1.80011000  | 4.63270300  |
| C | -3.20484600 | -2.48842300 | -3.47409800 |
| F | -2.57690700 | -0.85275000 | -5.13645600 |
| F | -3.75347600 | -4.11373000 | -1.76451300 |
| F | -5.39610300 | 1.08976200  | 4.47137300  |
| F | -3.65546800 | -3.34977300 | -4.46428200 |
| C | 2.91207800  | -4.31085000 | -1.06118000 |
| H | 3.24691500  | -5.34861300 | -0.88947900 |
| H | 2.21300700  | -4.33603900 | -1.90666000 |
| H | 3.79539600  | -3.73535900 | -1.37183800 |
| C | -0.17108000 | -4.61107900 | -0.29711800 |
| H | -0.33010000 | -4.11661300 | -1.26655000 |
| H | 0.14620000  | -5.64442500 | -0.51416100 |
| H | -1.14262300 | -4.66321800 | 0.20517200  |
| C | -0.55052700 | -3.52699000 | 2.74143200  |
| H | -1.46778200 | -3.48364000 | 2.14318200  |
| H | -0.56195000 | -4.48474900 | 3.29009100  |
| H | -0.60251800 | -2.72729500 | 3.49363800  |
| C | 2.30244200  | -2.53481900 | 3.79171000  |
| H | 1.48655500  | -1.94452200 | 4.23258300  |
| H | 2.44394900  | -3.41753600 | 4.43972300  |
| H | 3.21986600  | -1.93583700 | 3.85165500  |
| C | 4.47043600  | -3.06219000 | 1.47461300  |
| H | 4.74570600  | -2.14907000 | 2.01858600  |
| H | 4.88906200  | -3.91531200 | 2.03656800  |
| H | 4.97601000  | -3.03846800 | 0.50049600  |
| H | 2.19008000  | 0.89565000  | 3.29471200  |
| C | 5.01426200  | 0.82107700  | -0.53931600 |
| C | 4.84950900  | 1.96363600  | -1.59303500 |



|   |            |             |             |
|---|------------|-------------|-------------|
| C | 6.45609600 | 0.22877400  | -0.61066500 |
| H | 4.32069500 | 0.01833200  | -0.83083600 |
| C | 5.20152900 | 1.47781100  | -3.02136900 |
| H | 5.50662300 | 2.80860400  | -1.32465000 |
| H | 3.81761100 | 2.34590500  | -1.56529700 |
| C | 6.80283300 | -0.25962700 | -2.04015300 |
| H | 7.19046900 | 0.99382300  | -0.30700200 |
| H | 6.55523800 | -0.60306300 | 0.10708600  |
| C | 6.62093500 | 0.86245900  | -3.09203600 |
| H | 5.11949700 | 2.32285800  | -3.72577900 |
| H | 4.45905000 | 0.72591800  | -3.34765000 |
| H | 7.84085900 | -0.63407200 | -2.06059500 |
| H | 6.15447200 | -1.11583600 | -2.30600800 |
| H | 6.81319200 | 0.46685700  | -4.10383300 |
| H | 7.37148100 | 1.65400800  | -2.91399500 |

|                |            |          |          |
|----------------|------------|----------|----------|
| Frequencies -- | -1032.8500 | 7.8769   | 11.9810  |
| Frequencies -- | 22.1121    | 24.0842  | 26.8282  |
| Frequencies -- | 27.5331    | 30.8852  | 31.8370  |
| Frequencies -- | 33.6516    | 37.9680  | 41.2276  |
| Frequencies -- | 45.2070    | 47.4759  | 51.0742  |
| Frequencies -- | 69.9559    | 78.5138  | 86.2149  |
| Frequencies -- | 98.9413    | 104.0066 | 105.5041 |
| Frequencies -- | 110.1379   | 110.2360 | 114.2413 |
| Frequencies -- | 116.7493   | 120.7163 | 121.7490 |
| Frequencies -- | 125.3062   | 129.0828 | 136.0313 |
| Frequencies -- | 141.0703   | 142.4898 | 144.9038 |
| Frequencies -- | 145.4414   | 149.0065 | 152.1172 |
| Frequencies -- | 155.8071   | 159.3669 | 161.3189 |
| Frequencies -- | 163.0945   | 170.3866 | 174.5830 |
| Frequencies -- | 176.3950   | 188.7453 | 208.9643 |
| Frequencies -- | 215.4915   | 216.3661 | 222.3314 |
| Frequencies -- | 223.2477   | 224.5133 | 227.2469 |
| Frequencies -- | 245.8633   | 260.7446 | 264.6606 |
| Frequencies -- | 264.8006   | 265.1542 | 274.7062 |
| Frequencies -- | 275.2603   | 275.7332 | 283.1084 |
| Frequencies -- | 283.5242   | 290.9103 | 296.6091 |
| Frequencies -- | 299.1809   | 301.6689 | 302.1853 |
| Frequencies -- | 306.7422   | 307.3173 | 325.0375 |
| Frequencies -- | 326.5311   | 330.8105 | 336.8282 |
| Frequencies -- | 341.9996   | 354.8536 | 364.7667 |
| Frequencies -- | 372.8458   | 376.8670 | 378.5576 |
| Frequencies -- | 379.2190   | 380.9929 | 393.5135 |
| Frequencies -- | 397.7060   | 404.2067 | 431.3541 |
| Frequencies -- | 431.9044   | 434.0741 | 435.2722 |
| Frequencies -- | 439.7952   | 449.2952 | 456.4565 |
| Frequencies -- | 463.8001   | 476.2793 | 490.6970 |
| Frequencies -- | 496.8486   | 519.7451 | 531.1428 |
| Frequencies -- | 535.6461   | 536.7891 | 537.8864 |
| Frequencies -- | 544.6432   | 552.2369 | 554.5341 |
| Frequencies -- | 557.6335   | 573.0040 | 582.3500 |
| Frequencies -- | 594.9619   | 599.3691 | 606.0933 |
| Frequencies -- | 612.8172   | 616.9249 | 635.1689 |
| Frequencies -- | 635.9038   | 638.0014 | 643.4110 |
| Frequencies -- | 655.7882   | 666.8583 | 674.3900 |
| Frequencies -- | 701.3212   | 718.4116 | 723.2746 |
| Frequencies -- | 733.8743   | 741.5020 | 747.0204 |
| Frequencies -- | 748.1248   | 761.6649 | 765.1897 |
| Frequencies -- | 767.5888   | 770.8932 | 790.8323 |
| Frequencies -- | 802.3057   | 803.8652 | 820.4673 |
| Frequencies -- | 843.0302   | 864.6097 | 867.0847 |

|                |           |           |           |
|----------------|-----------|-----------|-----------|
| Frequencies -- | 871.2794  | 880.9278  | 884.8877  |
| Frequencies -- | 889.6683  | 899.7820  | 903.3445  |
| Frequencies -- | 912.5751  | 919.1070  | 924.0382  |
| Frequencies -- | 937.7384  | 957.3708  | 968.7540  |
| Frequencies -- | 973.3372  | 992.5683  | 997.0646  |
| Frequencies -- | 1006.6689 | 1019.0000 | 1029.0769 |
| Frequencies -- | 1038.6865 | 1042.0713 | 1043.5311 |
| Frequencies -- | 1045.7869 | 1046.2617 | 1049.8922 |
| Frequencies -- | 1052.0587 | 1052.7304 | 1053.2886 |
| Frequencies -- | 1053.9659 | 1055.9305 | 1056.3419 |
| Frequencies -- | 1082.3165 | 1087.4385 | 1089.6938 |
| Frequencies -- | 1093.8425 | 1098.9094 | 1114.0143 |
| Frequencies -- | 1125.7487 | 1153.1707 | 1170.4919 |
| Frequencies -- | 1174.7939 | 1183.4559 | 1192.6522 |
| Frequencies -- | 1197.3723 | 1209.4442 | 1212.7659 |
| Frequencies -- | 1215.2579 | 1224.4201 | 1245.6984 |
| Frequencies -- | 1269.4480 | 1276.4300 | 1280.9950 |
| Frequencies -- | 1291.9813 | 1298.2138 | 1312.5688 |
| Frequencies -- | 1316.5570 | 1319.3200 | 1325.7952 |
| Frequencies -- | 1326.3506 | 1337.1822 | 1343.6357 |
| Frequencies -- | 1345.2565 | 1349.2783 | 1351.5485 |
| Frequencies -- | 1353.2927 | 1358.8787 | 1360.6411 |
| Frequencies -- | 1370.4773 | 1384.9529 | 1409.3636 |
| Frequencies -- | 1411.3593 | 1413.2447 | 1419.0838 |
| Frequencies -- | 1422.2278 | 1423.2644 | 1426.1764 |
| Frequencies -- | 1428.5868 | 1429.3968 | 1435.4220 |
| Frequencies -- | 1444.9435 | 1450.7292 | 1452.5034 |
| Frequencies -- | 1462.3342 | 1466.2104 | 1467.3529 |
| Frequencies -- | 1469.2864 | 1471.6914 | 1480.3286 |
| Frequencies -- | 1481.0968 | 1482.0695 | 1483.7625 |
| Frequencies -- | 1486.3471 | 1488.4644 | 1491.3937 |
| Frequencies -- | 1492.1055 | 1495.7581 | 1497.2708 |
| Frequencies -- | 1500.0810 | 1502.7003 | 1505.5453 |
| Frequencies -- | 1507.7249 | 1511.5079 | 1516.9759 |
| Frequencies -- | 1527.8371 | 1585.8868 | 1594.0980 |
| Frequencies -- | 1596.0420 | 1598.7695 | 1612.7786 |
| Frequencies -- | 1617.0971 | 1620.2375 | 1623.0278 |
| Frequencies -- | 1826.0041 | 2945.9129 | 2991.8612 |
| Frequencies -- | 2999.0434 | 3004.8128 | 3008.3459 |
| Frequencies -- | 3010.5755 | 3012.2728 | 3014.6068 |
| Frequencies -- | 3014.7224 | 3021.9718 | 3022.1496 |
| Frequencies -- | 3035.0353 | 3055.3946 | 3059.3892 |
| Frequencies -- | 3066.3768 | 3074.3531 | 3083.9797 |
| Frequencies -- | 3095.2246 | 3096.6933 | 3100.0986 |
| Frequencies -- | 3100.2472 | 3103.0387 | 3103.5279 |
| Frequencies -- | 3104.0656 | 3133.2054 | 3140.0170 |
| Frequencies -- | 3142.4691 | 3146.8890 | 3156.3864 |
| Frequencies -- | 3165.5998 | 3167.3974 | 3178.2077 |
| Frequencies -- | 3192.0624 | 3193.0621 | 3204.9961 |

**Catalyst 14:**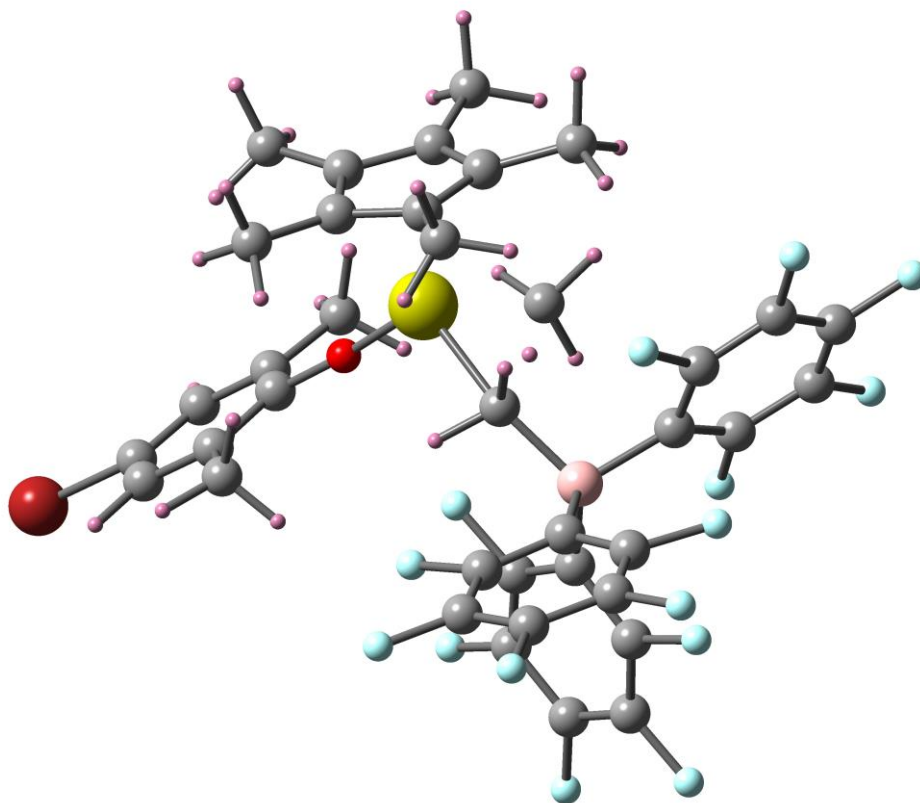

| vacuum        | toluene-like solvent | D3 dispersion |
|---------------|----------------------|---------------|
| -3133.5024764 | -3133.514216         | -0.60250211   |

Imaginary frequency corresponding to vibration along the reaction coordinate:  $-1025 \text{ cm}^{-1}$ .

|    |             |             |             |
|----|-------------|-------------|-------------|
| Ti | -0.96141300 | 1.99845400  | 0.17929500  |
| C  | -0.20053700 | 1.91876000  | -2.02719300 |
| H  | -0.01499900 | 1.03707400  | -2.65675200 |
| H  | -1.20102700 | 2.28329100  | -2.29309000 |
| H  | 0.54157200  | 2.68951000  | -2.25335300 |
| O  | -2.49090100 | 1.09406400  | 0.00295900  |
| C  | -3.72894600 | 0.45923200  | -0.02208500 |
| C  | -4.11479300 | -0.35678200 | 1.08285300  |
| C  | -4.56618600 | 0.62022700  | -1.16589800 |
| C  | -5.38941100 | -0.96842000 | 1.04749800  |
| C  | -5.83097000 | -0.01110700 | -1.16387400 |
| C  | -6.23525900 | -0.78540300 | -0.06109400 |
| H  | -5.70284600 | -1.59306200 | 1.88306700  |
| H  | -6.48409600 | 0.10059700  | -2.02851400 |
| C  | 0.01590600  | 3.63454600  | 1.77132200  |
| C  | 0.24877400  | 4.19895200  | 0.47376600  |
| C  | -1.42383700 | 3.50011200  | 1.95066900  |
| C  | -1.04424100 | 4.42333600  | -0.15852500 |
| C  | -2.07532000 | 4.03561500  | 0.77575100  |
| F  | -0.05103200 | -5.56521200 | -2.70587700 |
| C  | 0.35943800  | -4.38141000 | -2.11023000 |
| C  | 1.70240800  | -4.19060000 | -1.74220700 |

|    |             |             |             |
|----|-------------|-------------|-------------|
| C  | -0.55496700 | -3.34563600 | -1.86851400 |
| C  | 2.08815500  | -2.98035500 | -1.13849400 |
| F  | 2.63336400  | -5.19299800 | -1.98711300 |
| C  | -0.10968900 | -2.15410500 | -1.26163900 |
| F  | -1.89047400 | -3.49876100 | -2.23164300 |
| C  | 1.21531900  | -1.89983100 | -0.85598500 |
| F  | 3.45074000  | -2.86120400 | -0.84404600 |
| F  | -1.10661700 | -1.17665000 | -1.09315100 |
| B  | 1.78347800  | -0.53810800 | -0.07152300 |
| C  | 2.45516900  | -1.14672000 | 1.35482100  |
| C  | 2.86974000  | 0.32703900  | -1.00069800 |
| C  | 0.60924400  | 0.58971400  | 0.40425600  |
| C  | 3.83300700  | -1.25509400 | 1.66894800  |
| C  | 1.62428100  | -1.68019000 | 2.36893000  |
| C  | 3.07368300  | 0.17342500  | -2.39179000 |
| C  | 3.64251100  | 1.37737000  | -0.45255900 |
| H  | -0.21039800 | 0.04198300  | 0.91594600  |
| H  | 1.13507000  | 1.26351100  | 1.09962000  |
| H  | 0.24853300  | 1.25124500  | -0.95644600 |
| C  | 4.33580000  | -1.78836000 | 2.87415400  |
| F  | 4.81417000  | -0.84930700 | 0.76215900  |
| C  | 2.07192900  | -2.22357500 | 3.58733500  |
| F  | 0.22505800  | -1.72272700 | 2.18729500  |
| C  | 3.98738300  | 0.93123100  | -3.15557400 |
| F  | 2.32849100  | -0.75553400 | -3.13244800 |
| C  | 4.56265000  | 2.16546600  | -1.16301600 |
| F  | 3.51471900  | 1.69486500  | 0.91339600  |
| C  | 3.44990000  | -2.27188000 | 3.85002900  |
| F  | 5.70541600  | -1.84774700 | 3.10342900  |
| F  | 1.16637300  | -2.71170900 | 4.52575200  |
| C  | 4.74853900  | 1.93450000  | -2.53625100 |
| F  | 4.12642300  | 0.70565400  | -4.52041300 |
| F  | 5.27554900  | 3.17769800  | -0.52588700 |
| F  | 3.92477700  | -2.79611900 | 5.04356400  |
| F  | 5.64488300  | 2.70041600  | -3.26754600 |
| C  | -3.18888900 | -0.62504400 | 2.25455100  |
| H  | -2.35709400 | -1.27814500 | 1.95308200  |
| H  | -2.75100700 | 0.29621700  | 2.65976200  |
| H  | -3.72506600 | -1.12857100 | 3.06998300  |
| C  | -4.12316300 | 1.40400800  | -2.38816000 |
| H  | -3.81890800 | 2.42971200  | -2.13403400 |
| H  | -3.26631900 | 0.91321300  | -2.87561400 |
| H  | -4.93379700 | 1.46816300  | -3.12618400 |
| Br | -8.00544300 | -1.63900600 | -0.07807900 |
| C  | 1.04446200  | 3.36769000  | 2.84753300  |
| H  | 2.05521300  | 3.24286200  | 2.44416500  |
| H  | 1.07248200  | 4.21998200  | 3.54836200  |
| H  | 0.80996300  | 2.47364400  | 3.44377500  |
| C  | 1.57842400  | 4.65423900  | -0.08015600 |
| H  | 1.70043200  | 5.73626100  | 0.10339900  |
| H  | 2.42554400  | 4.14976900  | 0.39547700  |
| H  | 1.66157900  | 4.50927700  | -1.16596400 |
| C  | -2.10640400 | 3.11967300  | 3.24623800  |
| H  | -1.56136500 | 2.34180700  | 3.79911200  |
| H  | -2.16158200 | 4.00134600  | 3.90865100  |
| H  | -3.13446600 | 2.76915000  | 3.08941100  |
| C  | -1.26298800 | 5.16985700  | -1.45522000 |

|                |             |            |             |
|----------------|-------------|------------|-------------|
| H              | -1.27554200 | 6.25647600 | -1.26125400 |
| H              | -0.46674600 | 4.98584800 | -2.18779000 |
| H              | -2.22121000 | 4.91827100 | -1.92978100 |
| C              | -3.56123800 | 4.26408100 | 0.61920900  |
| H              | -4.16027800 | 3.47481400 | 1.09175200  |
| H              | -3.84066400 | 5.21852800 | 1.09859700  |
| H              | -3.86741900 | 4.33113200 | -0.43258000 |
|                |             |            |             |
| Frequencies -- | -1025.0706  | 7.0874     | 13.1810     |
| Frequencies -- | 16.8902     | 26.4279    | 26.6510     |
| Frequencies -- | 29.1260     | 31.0138    | 36.5708     |
| Frequencies -- | 38.8094     | 40.2835    | 47.2078     |
| Frequencies -- | 49.1404     | 59.2348    | 67.1894     |
| Frequencies -- | 77.5989     | 97.4426    | 101.6879    |
| Frequencies -- | 105.2074    | 110.9522   | 112.9684    |
| Frequencies -- | 114.4703    | 118.1366   | 120.7905    |
| Frequencies -- | 121.5895    | 126.1725   | 132.9277    |
| Frequencies -- | 137.7251    | 140.8755   | 142.1337    |
| Frequencies -- | 144.8598    | 146.4650   | 148.9879    |
| Frequencies -- | 155.0891    | 156.6518   | 156.9821    |
| Frequencies -- | 160.7785    | 161.1658   | 167.0178    |
| Frequencies -- | 172.2820    | 173.1266   | 176.3704    |
| Frequencies -- | 185.2732    | 191.4214   | 198.3767    |
| Frequencies -- | 202.3684    | 213.3593   | 216.4202    |
| Frequencies -- | 219.9164    | 221.7060   | 223.0807    |
| Frequencies -- | 234.9228    | 241.5019   | 258.9730    |
| Frequencies -- | 260.8729    | 264.3879   | 264.7664    |
| Frequencies -- | 264.8761    | 274.9545   | 275.7494    |
| Frequencies -- | 278.0829    | 285.9710   | 290.4086    |
| Frequencies -- | 299.0510    | 302.0263   | 302.9621    |
| Frequencies -- | 303.7969    | 307.3948   | 320.6548    |
| Frequencies -- | 325.7352    | 331.1081   | 336.2807    |
| Frequencies -- | 349.2641    | 357.3140   | 362.6594    |
| Frequencies -- | 372.6967    | 376.9151   | 377.7116    |
| Frequencies -- | 380.2965    | 390.0897   | 392.2410    |
| Frequencies -- | 395.1953    | 405.2978   | 420.9208    |
| Frequencies -- | 431.5097    | 432.7938   | 434.3540    |
| Frequencies -- | 450.1429    | 456.8261   | 463.8529    |
| Frequencies -- | 475.7806    | 501.2385   | 509.9294    |
| Frequencies -- | 529.3321    | 532.6387   | 533.6648    |
| Frequencies -- | 538.6987    | 544.6541   | 552.4790    |
| Frequencies -- | 554.5921    | 563.7313   | 565.8794    |
| Frequencies -- | 571.7631    | 575.7347   | 584.2415    |
| Frequencies -- | 594.8086    | 600.3802   | 608.3244    |
| Frequencies -- | 613.7991    | 634.3986   | 635.2439    |
| Frequencies -- | 637.6923    | 641.4970   | 654.4569    |
| Frequencies -- | 671.9894    | 698.7454   | 716.8830    |
| Frequencies -- | 721.4268    | 729.6676   | 732.5128    |
| Frequencies -- | 744.5125    | 747.3549   | 760.3837    |
| Frequencies -- | 769.5221    | 798.9950   | 801.6146    |
| Frequencies -- | 802.7238    | 840.7090   | 867.6713    |
| Frequencies -- | 880.1516    | 882.5532   | 883.9715    |
| Frequencies -- | 887.1840    | 902.8237   | 911.9753    |
| Frequencies -- | 918.6846    | 925.9799   | 949.8476    |
| Frequencies -- | 967.5086    | 972.1018   | 999.0808    |
| Frequencies -- | 1008.6345   | 1017.5591  | 1027.5089   |
| Frequencies -- | 1037.0636   | 1040.9182  | 1044.2666   |
| Frequencies -- | 1044.5732   | 1046.5314  | 1048.3790   |
| Frequencies -- | 1048.7605   | 1050.2240  | 1051.9641   |
| Frequencies -- | 1054.9916   | 1056.4796  | 1058.7381   |
| Frequencies -- | 1087.0675   | 1088.7709  | 1088.8509   |
| Frequencies -- | 1124.6483   | 1125.5473  | 1171.2297   |

|                |           |           |           |
|----------------|-----------|-----------|-----------|
| Frequencies -- | 1174.7385 | 1205.6429 | 1209.7839 |
| Frequencies -- | 1212.8830 | 1215.8726 | 1263.5314 |
| Frequencies -- | 1264.2807 | 1286.5390 | 1295.7437 |
| Frequencies -- | 1317.3455 | 1320.6569 | 1325.0945 |
| Frequencies -- | 1336.9272 | 1343.5599 | 1346.0797 |
| Frequencies -- | 1351.4154 | 1353.7564 | 1408.7747 |
| Frequencies -- | 1410.6023 | 1413.4081 | 1414.5192 |
| Frequencies -- | 1418.4523 | 1419.5986 | 1421.9049 |
| Frequencies -- | 1422.9470 | 1424.3342 | 1425.4825 |
| Frequencies -- | 1427.4620 | 1429.9857 | 1431.1275 |
| Frequencies -- | 1436.1642 | 1450.3660 | 1452.6541 |
| Frequencies -- | 1465.2852 | 1467.7545 | 1469.1586 |
| Frequencies -- | 1470.4973 | 1471.7806 | 1483.6800 |
| Frequencies -- | 1487.4739 | 1490.5611 | 1492.0596 |
| Frequencies -- | 1493.5591 | 1499.0264 | 1500.5786 |
| Frequencies -- | 1501.4267 | 1506.2860 | 1507.1178 |
| Frequencies -- | 1510.0981 | 1510.7141 | 1512.5927 |
| Frequencies -- | 1516.5471 | 1527.8625 | 1587.3592 |
| Frequencies -- | 1590.9146 | 1594.2402 | 1596.3699 |
| Frequencies -- | 1598.6480 | 1617.6776 | 1620.3187 |
| Frequencies -- | 1622.5175 | 1813.4615 | 2957.3916 |
| Frequencies -- | 3008.9982 | 3011.3530 | 3012.8784 |
| Frequencies -- | 3013.5784 | 3014.5754 | 3021.8410 |
| Frequencies -- | 3039.5962 | 3046.2345 | 3094.2698 |
| Frequencies -- | 3095.8506 | 3099.2054 | 3100.3267 |
| Frequencies -- | 3102.1922 | 3105.5243 | 3110.9614 |
| Frequencies -- | 3132.3979 | 3135.2860 | 3140.1672 |
| Frequencies -- | 3142.8129 | 3145.0048 | 3145.8316 |
| Frequencies -- | 3149.6607 | 3161.2015 | 3171.7776 |
| Frequencies -- | 3195.5844 | 3200.6349 | 3202.5506 |

**Catalyst 15:****distal conformation**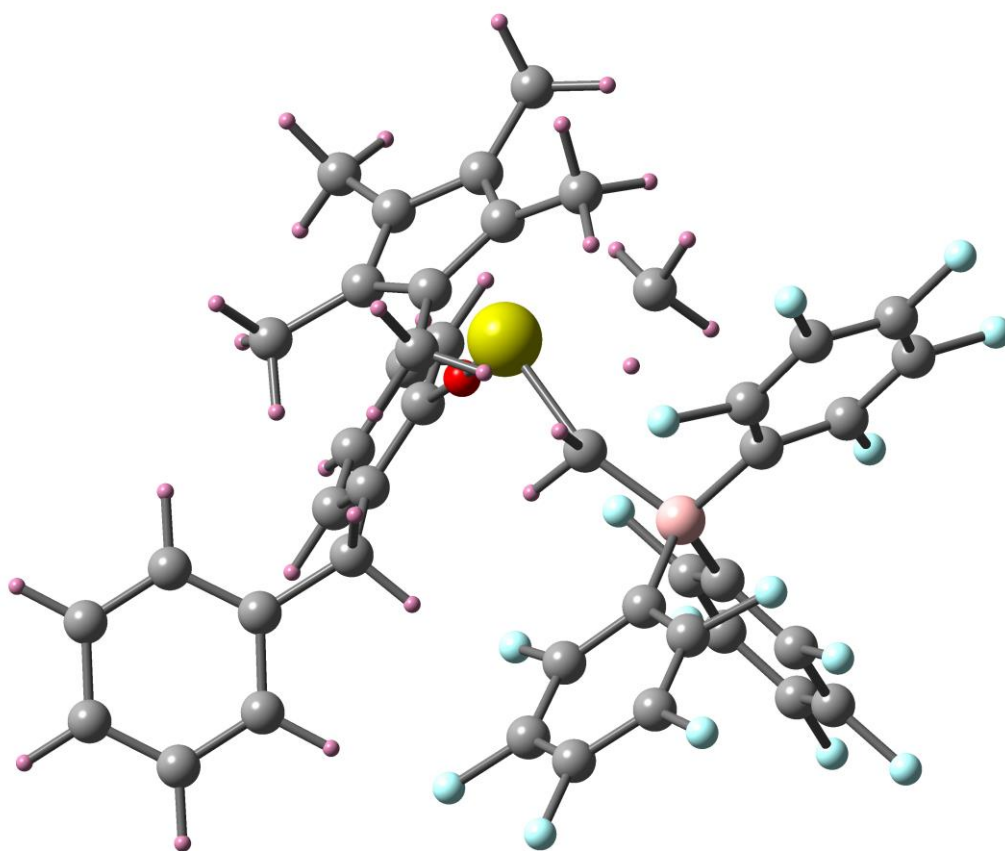

| <b>vacuum</b> | <b>toluene-like solvent</b> | <b>D3 dispersion</b> |
|---------------|-----------------------------|----------------------|
| -3312.5928371 | -3312.6060671               | -0.64928325          |

Imaginary frequency corresponding to vibration along the reaction coordinate:  $-962\text{ cm}^{-1}$ .

|    |             |             |             |
|----|-------------|-------------|-------------|
| Ti | 1.02574400  | 2.16818300  | -0.00846900 |
| C  | -0.42612800 | 2.63719100  | 1.75734200  |
| H  | -0.79801900 | 1.97320700  | 2.55098000  |
| H  | 0.43246600  | 3.17359900  | 2.18469200  |
| H  | -1.20840800 | 3.35274500  | 1.48715700  |
| O  | 2.39466100  | 1.54842400  | 0.94257200  |
| C  | 3.52878300  | 1.14464900  | 1.64136100  |
| C  | 4.29642300  | 0.01983100  | 1.21840500  |
| C  | 3.86230000  | 1.87459100  | 2.80901200  |
| C  | 5.40414500  | -0.33666100 | 2.02675700  |
| C  | 4.96995100  | 1.49447800  | 3.58657700  |
| C  | 5.74377000  | 0.38100600  | 3.19136800  |
| H  | 6.00716000  | -1.19682500 | 1.73504500  |
| H  | 5.21839500  | 2.05304800  | 4.49111900  |
| H  | 6.60125400  | 0.06830300  | 3.79016000  |
| C  | 0.76843000  | 3.11620200  | -2.26190700 |
| C  | 0.00012000  | 3.98008100  | -1.41122200 |

|   |             |             |             |
|---|-------------|-------------|-------------|
| C | 2.15621600  | 3.16608300  | -1.81710500 |
| C | 0.90628700  | 4.57478600  | -0.43901100 |
| C | 2.24223300  | 4.10545400  | -0.72127100 |
| F | -0.90587100 | -4.29379400 | 4.61935300  |
| C | -1.05869800 | -3.38450000 | 3.58218400  |
| C | -2.18705200 | -3.43284000 | 2.74569300  |
| C | -0.09258800 | -2.39460900 | 3.34873800  |
| C | -2.31194000 | -2.49999300 | 1.70099800  |
| F | -3.16698400 | -4.39432200 | 2.96376200  |
| C | -0.27283000 | -1.48407500 | 2.28779700  |
| F | 1.03299800  | -2.31724800 | 4.16491300  |
| C | -1.37118200 | -1.48192800 | 1.40513600  |
| F | -3.48097000 | -2.60041200 | 0.93851100  |
| F | 0.74586600  | -0.52426300 | 2.16046000  |
| B | -1.59851300 | -0.48621800 | 0.08215300  |
| C | -1.69020400 | -1.57217600 | -1.20971400 |
| C | -2.94714800 | 0.48740100  | 0.24008400  |
| C | -0.33428900 | 0.57830600  | -0.28132400 |
| C | -2.84859600 | -1.93345600 | -1.94172800 |
| C | -0.54190300 | -2.29141800 | -1.62047900 |
| C | -3.64011300 | 0.74480400  | 1.44594900  |
| C | -3.46814000 | 1.22111100  | -0.85182600 |
| H | 0.61755900  | 0.00454000  | -0.28897100 |
| H | -0.57678000 | 0.95754400  | -1.28864000 |
| H | -0.48456700 | 1.64652300  | 0.87968000  |
| C | -2.86370400 | -2.86850000 | -2.99803400 |
| F | -4.09640900 | -1.38714900 | -1.63440200 |
| C | -0.50188900 | -3.23545900 | -2.66313200 |
| F | 0.68425400  | -2.11115400 | -0.94472500 |
| C | -4.77002800 | 1.58317400  | 1.55654900  |
| F | -3.20820800 | 0.18855000  | 2.65899300  |
| C | -4.58673800 | 2.06917100  | -0.80072600 |
| F | -2.84609900 | 1.12812300  | -2.11176300 |
| C | -1.67938300 | -3.52361300 | -3.37109700 |
| F | -4.04600600 | -3.15620500 | -3.67027300 |
| F | 0.68567900  | -3.88401300 | -2.99263300 |
| C | -5.25831100 | 2.24693500  | 0.42045400  |
| F | -5.39330800 | 1.77262600  | 2.78501400  |
| F | -5.02343400 | 2.74376200  | -1.93765900 |
| F | -1.67401000 | -4.44578100 | -4.40797800 |
| F | -6.36189000 | 3.08372100  | 0.50624900  |
| C | 0.54722400  | 5.68132600  | 0.52691100  |
| H | 0.70324900  | 6.66140900  | 0.04360700  |
| H | -0.50458700 | 5.64190900  | 0.83704400  |
| H | 1.16665800  | 5.66937200  | 1.43474800  |
| C | -1.45181800 | 4.36158500  | -1.58534900 |
| H | -2.00489600 | 4.39295300  | -0.63604600 |
| H | -1.51445300 | 5.37370300  | -2.02130400 |
| H | -1.98171400 | 3.68308600  | -2.26124000 |
| C | 0.28267000  | 2.38995700  | -3.49718000 |
| H | -0.74707100 | 2.02360900  | -3.40721100 |
| H | 0.31296500  | 3.07552600  | -4.36156900 |
| H | 0.91703300  | 1.52887300  | -3.74898700 |
| C | 3.32642100  | 2.51985700  | -2.52621000 |
| H | 3.08724300  | 1.51694600  | -2.90566300 |
| H | 3.62336800  | 3.13047300  | -3.39658400 |
| H | 4.20631900  | 2.43115400  | -1.87667700 |



|   |            |             |             |
|---|------------|-------------|-------------|
| C | 3.51425200 | 4.59339900  | -0.06704400 |
| H | 4.28275300 | 3.81250800  | -0.00787800 |
| H | 3.93709500 | 5.42630400  | -0.65557800 |
| H | 3.34402700 | 4.97100400  | 0.94991100  |
| H | 3.23918500 | 2.71948200  | 3.10311000  |
| C | 3.88967500 | -0.81953700 | 0.00557300  |
| H | 3.16808500 | -1.57742300 | 0.34948200  |
| H | 3.33039500 | -0.18684700 | -0.69897800 |
| C | 5.01193200 | -1.52059900 | -0.76391600 |
| C | 6.11591500 | -0.79943000 | -1.28900500 |
| C | 4.93307100 | -2.90968800 | -1.03063000 |
| C | 7.11005500 | -1.44611700 | -2.05222400 |
| H | 6.20497400 | 0.27234300  | -1.09371700 |
| C | 5.92548100 | -3.56234700 | -1.79560800 |
| H | 4.08856300 | -3.48562600 | -0.64484300 |
| C | 7.01892500 | -2.83291100 | -2.30960200 |
| H | 7.95202700 | -0.87138300 | -2.44611900 |
| H | 5.84121800 | -4.63416800 | -1.98973400 |
| H | 7.78734600 | -3.33531800 | -2.90168400 |

|                |           |          |          |
|----------------|-----------|----------|----------|
| Frequencies -- | -961.9099 | 6.3863   | 10.8413  |
| Frequencies -- | 13.7161   | 18.4074  | 23.2813  |
| Frequencies -- | 25.2740   | 27.0744  | 30.1705  |
| Frequencies -- | 31.9863   | 36.0943  | 39.6767  |
| Frequencies -- | 42.7624   | 46.8882  | 50.3499  |
| Frequencies -- | 52.6233   | 69.2114  | 75.7948  |
| Frequencies -- | 82.2141   | 93.2930  | 97.3161  |
| Frequencies -- | 102.8928  | 106.6123 | 112.7131 |
| Frequencies -- | 114.8795  | 120.5231 | 124.4934 |
| Frequencies -- | 126.2355  | 130.5023 | 133.1713 |
| Frequencies -- | 135.9395  | 138.3649 | 141.1876 |
| Frequencies -- | 141.9999  | 144.2460 | 145.9937 |
| Frequencies -- | 155.7996  | 158.9964 | 161.3358 |
| Frequencies -- | 162.1794  | 167.9241 | 172.8442 |
| Frequencies -- | 183.0041  | 185.0455 | 197.8301 |
| Frequencies -- | 209.9114  | 215.1334 | 216.0152 |
| Frequencies -- | 219.8738  | 223.5878 | 229.4825 |
| Frequencies -- | 248.4691  | 264.2164 | 264.5227 |
| Frequencies -- | 265.2210  | 267.0929 | 274.5475 |
| Frequencies -- | 275.4775  | 277.6668 | 283.9718 |
| Frequencies -- | 288.7047  | 294.1126 | 295.5824 |
| Frequencies -- | 298.1204  | 301.6163 | 304.1792 |
| Frequencies -- | 306.1478  | 316.0702 | 324.8970 |
| Frequencies -- | 327.1795  | 329.0899 | 335.9048 |
| Frequencies -- | 351.2121  | 361.7305 | 371.8176 |
| Frequencies -- | 375.9617  | 377.0146 | 378.0248 |
| Frequencies -- | 381.3566  | 393.8480 | 396.4388 |
| Frequencies -- | 405.4767  | 406.5363 | 431.4307 |
| Frequencies -- | 432.4422  | 433.9312 | 445.8198 |
| Frequencies -- | 448.0705  | 456.7606 | 463.5914 |
| Frequencies -- | 467.4458  | 474.2709 | 481.9954 |
| Frequencies -- | 531.2783  | 533.5578 | 534.0434 |
| Frequencies -- | 537.0338  | 539.3598 | 544.2622 |
| Frequencies -- | 552.1243  | 553.3455 | 572.1009 |
| Frequencies -- | 576.0037  | 582.4550 | 592.5235 |
| Frequencies -- | 600.5994  | 605.0234 | 614.7463 |
| Frequencies -- | 620.3476  | 624.8182 | 634.5762 |
| Frequencies -- | 636.3255  | 638.0519 | 642.2945 |
| Frequencies -- | 653.2120  | 662.4063 | 670.8551 |
| Frequencies -- | 691.1587  | 707.2580 | 714.9728 |
| Frequencies -- | 717.5258  | 722.7801 | 732.5413 |

|                |           |           |           |
|----------------|-----------|-----------|-----------|
| Frequencies -- | 744.4575  | 744.9657  | 748.4391  |
| Frequencies -- | 760.6754  | 765.7460  | 770.1095  |
| Frequencies -- | 799.2470  | 800.6396  | 808.7012  |
| Frequencies -- | 828.7239  | 840.5632  | 862.1382  |
| Frequencies -- | 867.3681  | 870.0697  | 882.5496  |
| Frequencies -- | 888.8684  | 902.3769  | 912.1946  |
| Frequencies -- | 918.0882  | 920.6487  | 941.6747  |
| Frequencies -- | 950.0224  | 965.9134  | 968.3195  |
| Frequencies -- | 969.2507  | 988.6463  | 997.4845  |
| Frequencies -- | 1004.6168 | 1007.1261 | 1017.6332 |
| Frequencies -- | 1021.9842 | 1027.4316 | 1037.2730 |
| Frequencies -- | 1039.2272 | 1041.7366 | 1044.2511 |
| Frequencies -- | 1046.4448 | 1047.0788 | 1049.8784 |
| Frequencies -- | 1052.4636 | 1052.6736 | 1053.7677 |
| Frequencies -- | 1056.7980 | 1086.1373 | 1086.2148 |
| Frequencies -- | 1090.8199 | 1092.8346 | 1109.8526 |
| Frequencies -- | 1122.9846 | 1170.4462 | 1174.1114 |
| Frequencies -- | 1178.6951 | 1183.0478 | 1194.5978 |
| Frequencies -- | 1205.0981 | 1209.2723 | 1212.7595 |
| Frequencies -- | 1215.5836 | 1220.6947 | 1224.0012 |
| Frequencies -- | 1240.5533 | 1264.2659 | 1290.8090 |
| Frequencies -- | 1297.6283 | 1315.7456 | 1319.1161 |
| Frequencies -- | 1320.2122 | 1325.1600 | 1336.5860 |
| Frequencies -- | 1342.4897 | 1344.3535 | 1352.2652 |
| Frequencies -- | 1357.9966 | 1376.5693 | 1382.2610 |
| Frequencies -- | 1407.7506 | 1410.5817 | 1412.2965 |
| Frequencies -- | 1419.3823 | 1422.1953 | 1423.1969 |
| Frequencies -- | 1424.0147 | 1426.1652 | 1428.1498 |
| Frequencies -- | 1433.7079 | 1445.5660 | 1449.3155 |
| Frequencies -- | 1452.6600 | 1455.4160 | 1462.7961 |
| Frequencies -- | 1467.2086 | 1467.2952 | 1469.5133 |
| Frequencies -- | 1471.4645 | 1478.9943 | 1481.6724 |
| Frequencies -- | 1488.5137 | 1489.8702 | 1492.5311 |
| Frequencies -- | 1497.2854 | 1498.9801 | 1502.0609 |
| Frequencies -- | 1502.5219 | 1506.8287 | 1507.4835 |
| Frequencies -- | 1511.0930 | 1514.9174 | 1524.0443 |
| Frequencies -- | 1586.8811 | 1593.7481 | 1596.0854 |
| Frequencies -- | 1599.3984 | 1604.0814 | 1615.9982 |
| Frequencies -- | 1617.0964 | 1620.4397 | 1622.6375 |
| Frequencies -- | 1626.9856 | 1788.6286 | 2951.0872 |
| Frequencies -- | 3010.6669 | 3010.9902 | 3012.3029 |
| Frequencies -- | 3014.2422 | 3015.3374 | 3037.9937 |
| Frequencies -- | 3041.0086 | 3087.7786 | 3091.6022 |
| Frequencies -- | 3096.1746 | 3099.3149 | 3100.6541 |
| Frequencies -- | 3104.8809 | 3106.0707 | 3134.2637 |
| Frequencies -- | 3140.0443 | 3142.3484 | 3147.3570 |
| Frequencies -- | 3148.1062 | 3149.5637 | 3155.4898 |
| Frequencies -- | 3166.1382 | 3167.1111 | 3170.3745 |
| Frequencies -- | 3175.3357 | 3180.6494 | 3190.5332 |
| Frequencies -- | 3191.8943 | 3194.4947 | 3204.3133 |

**proximal conformation**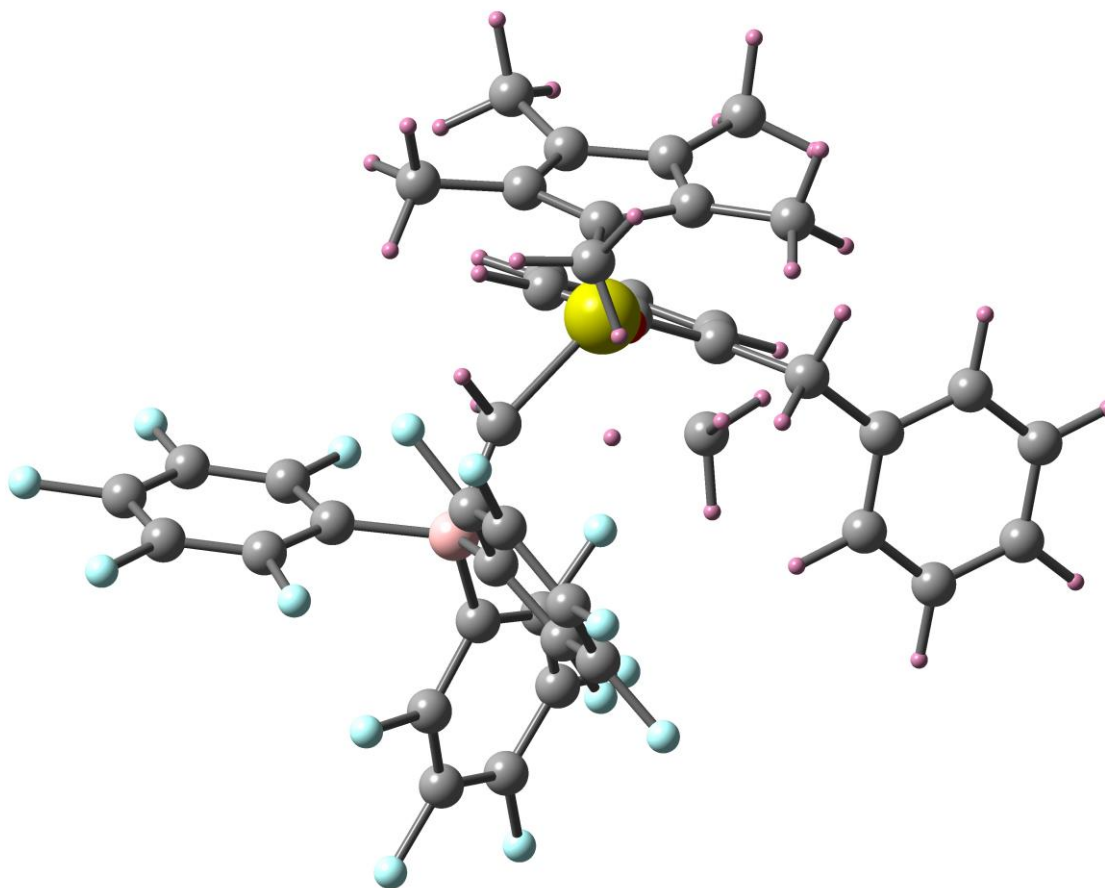

| <b>vacuum</b> | <b>toluene-like solvent</b> | <b>D3 dispersion</b> |
|---------------|-----------------------------|----------------------|
| -3312.593656  | -3312.6064956               | -0.64833272          |

Imaginary frequency corresponding to vibration along the reaction coordinate:  $-876 \text{ cm}^{-1}$ .

|    |             |             |             |
|----|-------------|-------------|-------------|
| Ti | 1.03370900  | -2.01570100 | 0.24756300  |
| C  | 1.02414000  | -1.29013100 | -1.97433100 |
| H  | 0.93054700  | -0.27935700 | -2.39637100 |
| H  | 2.10019700  | -1.51339700 | -1.95078700 |
| H  | 0.51398500  | -2.00247500 | -2.62920800 |
| O  | 2.39538400  | -1.08693800 | 0.91947200  |
| C  | 3.37259100  | -0.47548200 | 1.70074200  |
| C  | 3.10941200  | -0.29804000 | 3.08076600  |
| C  | 4.58372000  | -0.01706900 | 1.10429700  |
| C  | 4.07224600  | 0.31164900  | 3.90547700  |
| C  | 5.53312000  | 0.58564500  | 1.96333700  |
| C  | 5.29325700  | 0.74513800  | 3.34472300  |
| H  | 3.86502600  | 0.45384400  | 4.96787100  |
| H  | 6.46715400  | 0.95233700  | 1.53851000  |
| H  | 6.04795100  | 1.22029100  | 3.97427500  |
| C  | -0.12470400 | -4.02540100 | 1.06932900  |
| C  | -0.05376700 | -4.19377400 | -0.35489500 |
| C  | 1.23716300  | -3.95509400 | 1.58442100  |

|   |             |             |             |
|---|-------------|-------------|-------------|
| C | 1.34964900  | -4.23190000 | -0.73235400 |
| C | 2.14350800  | -4.12417600 | 0.47100500  |
| F | 0.46012600  | 6.04558100  | -0.42750700 |
| C | -0.02428700 | 4.74673500  | -0.36913900 |
| C | -1.40547800 | 4.49099200  | -0.41612600 |
| C | 0.85388000  | 3.65744800  | -0.27393200 |
| C | -1.86552200 | 3.16290200  | -0.35443200 |
| F | -2.29865100 | 5.54940600  | -0.53339300 |
| C | 0.33560900  | 2.34895100  | -0.21431700 |
| F | 2.23118400  | 3.87555300  | -0.24783300 |
| C | -1.03438800 | 2.02092700  | -0.23732700 |
| F | -3.25118400 | 3.00100900  | -0.45904400 |
| F | 1.31020700  | 1.33734500  | -0.15985600 |
| B | -1.70289600 | 0.49602700  | -0.10101800 |
| C | -2.78352400 | 0.63232700  | 1.18985200  |
| C | -2.41160800 | -0.02144700 | -1.52332600 |
| C | -0.64037500 | -0.74523800 | 0.34001400  |
| C | -4.19832800 | 0.63606500  | 1.11844500  |
| C | -2.30418400 | 0.81285100  | 2.51022900  |
| C | -2.23653400 | 0.57461700  | -2.79424100 |
| C | -3.20824100 | -1.19035000 | -1.57810300 |
| H | -0.07157700 | -0.40344100 | 1.23433800  |
| H | -1.30081100 | -1.59118600 | 0.58983600  |
| H | 0.20280200  | -0.96921700 | -0.99819200 |
| C | -5.05212800 | 0.75105700  | 2.23517600  |
| F | -4.85672600 | 0.55218400  | -0.11034900 |
| C | -3.11045000 | 0.93542600  | 3.65724100  |
| F | -0.91720700 | 0.91102300  | 2.75462200  |
| C | -2.83077500 | 0.10769400  | -3.98648500 |
| F | -1.40753500 | 1.69350700  | -2.95927000 |
| C | -3.82094600 | -1.70212400 | -2.73394400 |
| F | -3.43803700 | -1.93381100 | -0.40501400 |
| C | -4.50696800 | 0.89444300  | 3.52100300  |
| F | -6.43281200 | 0.73324100  | 2.07464600  |
| F | -2.53867000 | 1.09529400  | 4.91688400  |
| C | -3.63986000 | -1.03851000 | -3.95906600 |
| F | -2.60836800 | 0.76435100  | -5.19153600 |
| F | -4.59286500 | -2.85930500 | -2.67867600 |
| F | -5.32983600 | 1.00499400  | 4.63296300  |
| F | -4.22862600 | -1.52083900 | -5.11902500 |
| C | 1.87576300  | -4.57121600 | -2.10896300 |
| H | 2.15270900  | -5.63831800 | -2.15282100 |
| H | 1.12594900  | -4.39952200 | -2.89089000 |
| H | 2.77575900  | -3.99934500 | -2.37774900 |
| C | -1.21825100 | -4.43174100 | -1.28999200 |
| H | -1.30711500 | -3.66390800 | -2.07175300 |
| H | -1.10077300 | -5.40043000 | -1.80206900 |
| H | -2.17059100 | -4.45476000 | -0.74935300 |
| C | -1.38033500 | -4.06390800 | 1.91411900  |
| H | -2.17951500 | -3.41805100 | 1.52834200  |
| H | -1.77870600 | -5.09219700 | 1.93852700  |
| H | -1.18630700 | -3.76749200 | 2.95297200  |
| C | 1.62197800  | -3.93651600 | 3.04793800  |
| H | 0.96825100  | -3.28940200 | 3.64975800  |
| H | 1.54069200  | -4.95434900 | 3.46752100  |
| H | 2.65537900  | -3.60190000 | 3.20175900  |
| C | 3.64480700  | -4.27738200 | 0.56071300  |

|   |            |             |             |
|---|------------|-------------|-------------|
| H | 4.08996000 | -3.62900000 | 1.32689500  |
| H | 3.89622300 | -5.31862100 | 0.82792900  |
| H | 4.14125000 | -4.06162300 | -0.39495500 |
| H | 2.15245200 | -0.62036900 | 3.49092100  |
| C | 4.82061700 | -0.18006000 | -0.40282800 |
| H | 5.09983600 | -1.22999300 | -0.59975600 |
| H | 3.86062700 | -0.01483900 | -0.91162200 |
| C | 5.87038800 | 0.73940200  | -1.02526600 |
| C | 7.14939700 | 0.25125300  | -1.38937700 |
| C | 5.57282800 | 2.10411100  | -1.27730400 |
| C | 8.10932300 | 1.09857300  | -1.98748600 |
| H | 7.39926200 | -0.79794900 | -1.20827900 |
| C | 6.52805600 | 2.95390100  | -1.87335600 |
| H | 4.59364300 | 2.50435000  | -1.00528100 |
| C | 7.80098700 | 2.45445700  | -2.23142800 |
| H | 9.08903800 | 0.70070600  | -2.26298100 |
| H | 6.27758700 | 4.00059300  | -2.06137000 |
| H | 8.53922200 | 3.11200000  | -2.69642000 |

|                |           |          |          |
|----------------|-----------|----------|----------|
| Frequencies -- | -876.4607 | 9.5651   | 12.1609  |
| Frequencies -- | 16.4316   | 25.3119  | 25.6788  |
| Frequencies -- | 28.7669   | 28.9792  | 31.8216  |
| Frequencies -- | 33.0871   | 37.3821  | 39.3937  |
| Frequencies -- | 42.2802   | 47.2801  | 49.6515  |
| Frequencies -- | 50.8959   | 68.8943  | 78.7422  |
| Frequencies -- | 85.2675   | 93.9979  | 100.3774 |
| Frequencies -- | 107.0072  | 110.6600 | 113.0436 |
| Frequencies -- | 116.6571  | 118.9972 | 122.9586 |
| Frequencies -- | 125.5382  | 126.2883 | 133.6679 |
| Frequencies -- | 138.5579  | 139.2346 | 142.7978 |
| Frequencies -- | 144.4942  | 150.3306 | 154.8506 |
| Frequencies -- | 156.8382  | 160.8459 | 161.7849 |
| Frequencies -- | 165.6501  | 172.1283 | 175.4556 |
| Frequencies -- | 187.9301  | 192.2761 | 210.8186 |
| Frequencies -- | 214.8712  | 217.3177 | 222.4638 |
| Frequencies -- | 223.4377  | 229.4993 | 242.1470 |
| Frequencies -- | 247.9619  | 259.0251 | 264.3956 |
| Frequencies -- | 264.7142  | 264.9578 | 275.4991 |
| Frequencies -- | 276.3302  | 277.4351 | 282.9268 |
| Frequencies -- | 285.9928  | 294.0803 | 302.0178 |
| Frequencies -- | 302.8107  | 303.2809 | 305.9261 |
| Frequencies -- | 312.6340  | 321.3458 | 325.5718 |
| Frequencies -- | 327.2505  | 330.1150 | 336.4213 |
| Frequencies -- | 350.0823  | 363.1599 | 372.5238 |
| Frequencies -- | 376.7243  | 377.7869 | 380.0238 |
| Frequencies -- | 381.2157  | 393.7611 | 396.8102 |
| Frequencies -- | 405.2309  | 406.8820 | 431.6219 |
| Frequencies -- | 432.2769  | 434.3659 | 444.0283 |
| Frequencies -- | 450.2058  | 456.9460 | 464.1397 |
| Frequencies -- | 468.0721  | 480.3103 | 490.4341 |
| Frequencies -- | 531.9928  | 535.2072 | 536.0088 |
| Frequencies -- | 537.9145  | 540.0828 | 545.1477 |
| Frequencies -- | 554.8559  | 561.1044 | 572.1358 |
| Frequencies -- | 580.5812  | 581.6870 | 594.3893 |
| Frequencies -- | 601.1343  | 601.6352 | 619.8303 |
| Frequencies -- | 623.6780  | 623.8123 | 634.3944 |
| Frequencies -- | 635.5219  | 638.4306 | 643.5073 |
| Frequencies -- | 655.7534  | 660.6805 | 672.5433 |
| Frequencies -- | 696.8902  | 707.3926 | 713.0307 |
| Frequencies -- | 718.5786  | 722.2458 | 733.3320 |
| Frequencies -- | 746.4196  | 747.2886 | 749.0214 |

|                |           |           |           |
|----------------|-----------|-----------|-----------|
| Frequencies -- | 761.3063  | 766.7497  | 770.7415  |
| Frequencies -- | 803.6473  | 804.8292  | 808.8764  |
| Frequencies -- | 831.8186  | 843.6007  | 865.1699  |
| Frequencies -- | 867.6070  | 872.9764  | 883.5276  |
| Frequencies -- | 903.0719  | 912.0484  | 913.0470  |
| Frequencies -- | 922.8170  | 929.7706  | 937.4685  |
| Frequencies -- | 944.5231  | 966.3196  | 970.5365  |
| Frequencies -- | 972.3422  | 990.2231  | 997.9020  |
| Frequencies -- | 1006.2130 | 1008.5720 | 1019.8542 |
| Frequencies -- | 1021.8253 | 1029.1988 | 1039.4271 |
| Frequencies -- | 1040.0055 | 1044.3462 | 1045.7206 |
| Frequencies -- | 1048.9041 | 1050.4838 | 1051.4197 |
| Frequencies -- | 1052.8976 | 1053.0991 | 1054.2395 |
| Frequencies -- | 1056.0801 | 1088.1640 | 1089.3962 |
| Frequencies -- | 1093.8516 | 1099.5275 | 1109.4079 |
| Frequencies -- | 1124.9673 | 1170.1495 | 1175.5119 |
| Frequencies -- | 1181.9906 | 1183.1301 | 1191.9016 |
| Frequencies -- | 1203.7911 | 1206.6723 | 1209.5957 |
| Frequencies -- | 1213.1522 | 1214.9043 | 1222.3700 |
| Frequencies -- | 1241.2005 | 1276.2565 | 1287.0864 |
| Frequencies -- | 1308.7563 | 1316.6312 | 1318.7896 |
| Frequencies -- | 1319.4177 | 1325.9748 | 1337.2567 |
| Frequencies -- | 1343.3546 | 1345.8172 | 1350.3434 |
| Frequencies -- | 1352.7044 | 1375.5330 | 1380.2806 |
| Frequencies -- | 1410.1726 | 1411.4884 | 1413.3873 |
| Frequencies -- | 1419.4409 | 1421.1492 | 1425.0344 |
| Frequencies -- | 1425.5276 | 1428.1989 | 1430.0727 |
| Frequencies -- | 1434.2711 | 1445.7575 | 1450.1321 |
| Frequencies -- | 1453.5036 | 1455.4793 | 1464.9103 |
| Frequencies -- | 1467.4242 | 1469.0620 | 1471.4326 |
| Frequencies -- | 1473.4771 | 1480.1294 | 1485.1635 |
| Frequencies -- | 1491.7654 | 1493.3758 | 1494.6931 |
| Frequencies -- | 1496.4764 | 1500.2447 | 1502.2171 |
| Frequencies -- | 1503.8287 | 1507.6012 | 1508.3362 |
| Frequencies -- | 1512.9926 | 1516.8485 | 1522.0137 |
| Frequencies -- | 1588.2608 | 1594.4291 | 1596.3554 |
| Frequencies -- | 1598.0094 | 1604.7117 | 1614.0888 |
| Frequencies -- | 1617.1378 | 1620.0832 | 1622.7739 |
| Frequencies -- | 1627.3916 | 1814.0980 | 2929.7475 |
| Frequencies -- | 3010.1161 | 3011.0593 | 3014.3397 |
| Frequencies -- | 3017.8112 | 3020.5061 | 3026.7947 |
| Frequencies -- | 3038.8186 | 3095.5500 | 3096.8712 |
| Frequencies -- | 3097.2642 | 3098.8567 | 3102.1849 |
| Frequencies -- | 3107.2159 | 3112.5055 | 3135.7332 |
| Frequencies -- | 3139.5786 | 3143.9841 | 3144.8520 |
| Frequencies -- | 3145.6849 | 3148.9633 | 3157.2857 |
| Frequencies -- | 3162.5412 | 3167.9286 | 3168.6412 |
| Frequencies -- | 3179.8886 | 3183.6422 | 3191.5716 |
| Frequencies -- | 3193.3926 | 3199.8166 | 3207.6805 |

**Catalyst 16:**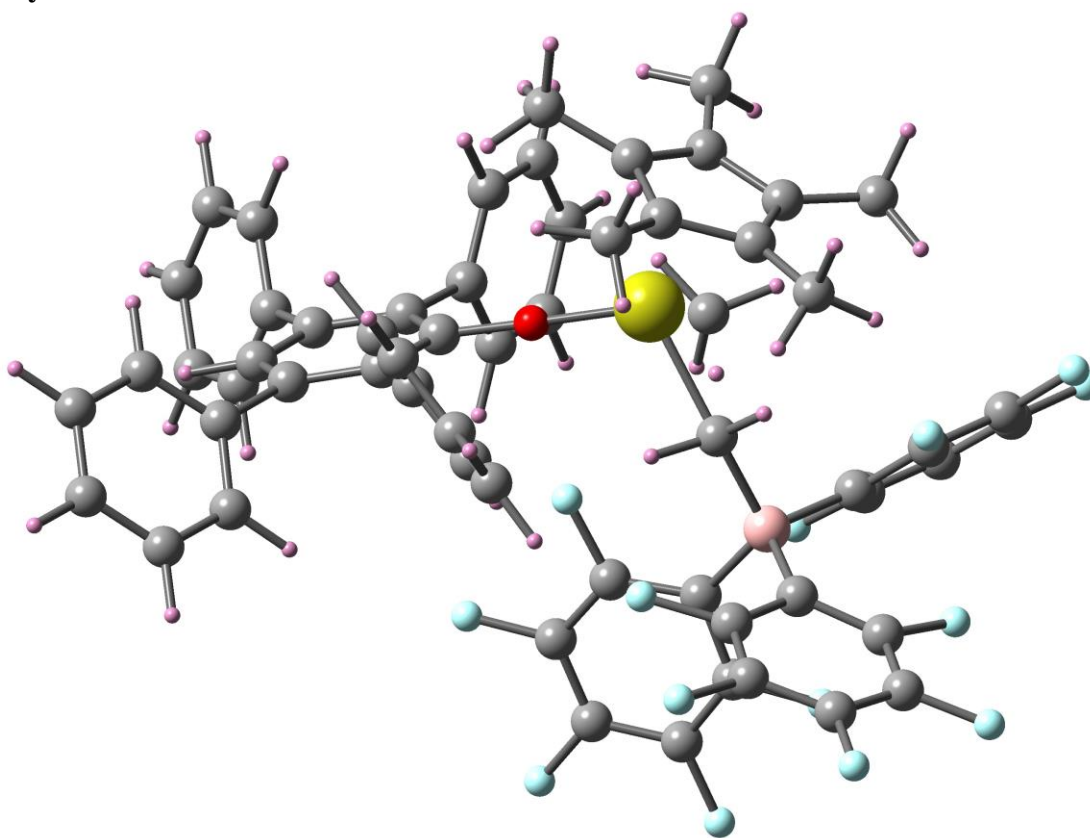

| vacuum       | toluene-like solvent | D3 dispersion |
|--------------|----------------------|---------------|
| -3966.126723 | -3966.1419353        | -0.89084065   |

Imaginary frequency corresponding to vibration along the reaction coordinate:  $-995\text{ cm}^{-1}$ .

|    |             |             |             |
|----|-------------|-------------|-------------|
| Ti | -0.03651500 | -0.49897300 | -2.00034700 |
| C  | 0.66009200  | -2.46676300 | -1.00196700 |
| H  | 0.68740600  | -2.67492300 | 0.07470900  |
| H  | -0.30020800 | -2.85554500 | -1.35925700 |
| H  | 1.47434900  | -2.99736100 | -1.50143700 |
| O  | -1.63849400 | -0.26826500 | -1.21870300 |
| C  | -2.89364200 | -0.09376100 | -0.62692200 |
| C  | -3.47227300 | 1.21781700  | -0.57042100 |
| C  | -3.55204100 | -1.24104500 | -0.07478100 |
| C  | -4.73148700 | 1.37084700  | 0.08928500  |
| C  | -4.81586900 | -1.05832400 | 0.55987000  |
| C  | -5.37143000 | 0.23578400  | 0.63057900  |
| H  | -6.32465000 | 0.36627700  | 1.14061500  |
| C  | 1.27302700  | 0.14703300  | -4.05084000 |
| C  | 1.36774700  | -1.28154500 | -4.01497900 |
| C  | -0.13535100 | 0.50021700  | -4.14022200 |
| C  | 0.01994900  | -1.82545000 | -4.08410100 |
| C  | -0.90561700 | -0.72436100 | -4.20340400 |
| F  | 0.36510300  | 0.00075600  | 6.12691600  |
| C  | 0.87110900  | 0.02680200  | 4.83472600  |
| C  | 2.25399700  | 0.13035400  | 4.60491600  |

|   |             |             |             |
|---|-------------|-------------|-------------|
| C | 0.01468200  | -0.05473100 | 3.72735200  |
| C | 2.73561700  | 0.14939100  | 3.28343500  |
| F | 3.12839800  | 0.20021400  | 5.68336900  |
| C | 0.55456900  | -0.02489600 | 2.42618900  |
| F | -1.36231500 | -0.17248800 | 3.91829100  |
| C | 1.92590800  | 0.07551800  | 2.12232700  |
| F | 4.12712200  | 0.21334800  | 3.15118700  |
| F | -0.39830100 | -0.12077100 | 1.39806400  |
| B | 2.61170000  | 0.16309300  | 0.59951100  |
| C | 3.45112700  | 1.63179900  | 0.63520300  |
| C | 3.60066800  | -1.14851200 | 0.28462000  |
| C | 1.52749700  | 0.26069800  | -0.71237500 |
| C | 4.85454700  | 1.82673900  | 0.67573600  |
| C | 2.73634500  | 2.85129600  | 0.69048400  |
| C | 3.62923600  | -2.35808300 | 1.01694800  |
| C | 4.47161900  | -1.17084100 | -0.82966300 |
| H | 0.73899500  | 1.00202300  | -0.47011100 |
| H | 2.14130100  | 0.60883400  | -1.55475900 |
| H | 1.12652000  | -1.23558200 | -0.81115300 |
| C | 5.48355700  | 3.08963600  | 0.69751400  |
| F | 5.73478700  | 0.74379300  | 0.72854900  |
| C | 3.31044200  | 4.13526100  | 0.71266900  |
| F | 1.32928800  | 2.83589500  | 0.76424300  |
| C | 4.47123900  | -3.45229700 | 0.72538100  |
| F | 2.76126600  | -2.56843900 | 2.09908500  |
| C | 5.32950200  | -2.22983800 | -1.16949500 |
| F | 4.52087200  | -0.06200900 | -1.69389900 |
| C | 4.70814800  | 4.26006100  | 0.70475900  |
| F | 6.87025700  | 3.18802500  | 0.72074400  |
| F | 2.50667500  | 5.27407800  | 0.74511100  |
| C | 5.33994800  | -3.38809500 | -0.37473100 |
| F | 4.43260800  | -4.60289800 | 1.50588700  |
| F | 6.15371300  | -2.14856600 | -2.28922200 |
| F | 5.30867200  | 5.51118500  | 0.71853800  |
| F | 6.17028800  | -4.45510300 | -0.68806800 |
| C | -0.31075900 | -3.28923700 | -4.26344100 |
| H | -0.19242500 | -3.56572700 | -5.32600700 |
| H | 0.35370800  | -3.94541300 | -3.68609600 |
| H | -1.34338900 | -3.52358900 | -3.97895300 |
| C | 2.63434200  | -2.09937800 | -4.10068300 |
| H | 2.60461400  | -3.00568300 | -3.48050400 |
| H | 2.77799700  | -2.43823800 | -5.14191700 |
| H | 3.52389400  | -1.52506000 | -3.82361900 |
| C | 2.40903500  | 1.13790200  | -4.16400400 |
| H | 3.36069300  | 0.73385400  | -3.80400100 |
| H | 2.54754900  | 1.41895900  | -5.22255300 |
| H | 2.20992900  | 2.06851600  | -3.61293600 |
| C | -0.64814900 | 1.89208100  | -4.41859100 |
| H | -0.12989900 | 2.66024100  | -3.83101900 |
| H | -0.48461900 | 2.13372600  | -5.48407200 |
| H | -1.71787700 | 1.99131800  | -4.21662600 |
| C | -2.38409800 | -0.82410800 | -4.50241200 |
| H | -2.95562900 | 0.00504200  | -4.06640600 |
| H | -2.54330600 | -0.79455600 | -5.59471400 |
| H | -2.82141800 | -1.76179300 | -4.13683500 |
| C | -5.42117600 | 2.69611300  | 0.28878100  |
| C | -6.73339400 | 2.89659300  | -0.21391500 |



|                |             |             |             |
|----------------|-------------|-------------|-------------|
| C              | -4.82999100 | 3.73432000  | 1.05430000  |
| C              | -7.42700100 | 4.10244500  | 0.02300300  |
| H              | -7.21091600 | 2.10803900  | -0.79999900 |
| C              | -5.52387500 | 4.93732000  | 1.29950500  |
| H              | -3.83210700 | 3.59734000  | 1.47202500  |
| C              | -6.82380900 | 5.12963000  | 0.78133400  |
| H              | -8.43356900 | 4.23706100  | -0.38039300 |
| H              | -5.05094500 | 5.71996000  | 1.89733500  |
| H              | -7.35973200 | 6.06272300  | 0.97016300  |
| C              | -5.59589300 | -2.17735100 | 1.20314100  |
| C              | -6.24163500 | -3.17810400 | 0.43363100  |
| C              | -5.76447100 | -2.19797200 | 2.61203900  |
| C              | -7.02566200 | -4.17429400 | 1.05310700  |
| H              | -6.14262800 | -3.17285700 | -0.65304900 |
| C              | -6.54222300 | -3.19725900 | 3.23505600  |
| H              | -5.27641700 | -1.43545300 | 3.22292900  |
| C              | -7.17686800 | -4.19038300 | 2.45724200  |
| H              | -7.51861700 | -4.93308900 | 0.44051100  |
| H              | -6.65073500 | -3.19873600 | 4.32222500  |
| H              | -7.78183200 | -4.96306600 | 2.93738600  |
| C              | -2.83204000 | 2.43453900  | -1.18438800 |
| C              | -3.48489100 | 3.11457800  | -2.24672200 |
| C              | -1.65393100 | 3.00872900  | -0.64566000 |
| C              | -2.98714900 | 4.33671600  | -2.74324000 |
| H              | -4.40321700 | 2.69956900  | -2.66589600 |
| C              | -1.15191600 | 4.23298000  | -1.13944200 |
| H              | -1.15648000 | 2.52750200  | 0.19439200  |
| C              | -1.81961400 | 4.90431600  | -2.18676500 |
| H              | -3.51735700 | 4.84991200  | -3.54901900 |
| H              | -0.25783000 | 4.66613600  | -0.68819300 |
| H              | -1.44203900 | 5.86099200  | -2.55507500 |
| C              | -2.94765400 | -2.62174800 | -0.07879500 |
| C              | -3.09041200 | -3.48826700 | -1.19074100 |
| C              | -2.32640300 | -3.12582400 | 1.09257000  |
| C              | -2.63259000 | -4.82307900 | -1.13582100 |
| H              | -3.59522900 | -3.12774100 | -2.08943300 |
| C              | -1.86617600 | -4.45763200 | 1.15090800  |
| H              | -2.21834300 | -2.47754600 | 1.96280200  |
| C              | -2.01902800 | -5.31336800 | 0.03757900  |
| H              | -2.77028100 | -5.48097200 | -1.99756500 |
| H              | -1.39755000 | -4.82770500 | 2.06562100  |
| H              | -1.67343100 | -6.34830000 | 0.08743000  |
| Frequencies -- | -994.8033   | 8.7306      | 11.2770     |
| Frequencies -- | 15.3748     | 21.0442     | 27.0807     |
| Frequencies -- | 28.2227     | 29.1790     | 31.0928     |
| Frequencies -- | 33.6742     | 35.8290     | 38.2745     |
| Frequencies -- | 42.0730     | 42.4939     | 44.2458     |
| Frequencies -- | 49.3868     | 50.4280     | 52.7070     |
| Frequencies -- | 56.0502     | 59.1281     | 63.3374     |
| Frequencies -- | 70.4111     | 76.9876     | 81.8714     |
| Frequencies -- | 87.1928     | 92.7146     | 102.6363    |
| Frequencies -- | 104.2154    | 110.2881    | 112.9435    |
| Frequencies -- | 115.4598    | 115.6839    | 118.6623    |
| Frequencies -- | 120.7113    | 122.5695    | 125.0987    |
| Frequencies -- | 126.5710    | 133.9838    | 136.7268    |
| Frequencies -- | 140.3510    | 141.1388    | 143.5507    |
| Frequencies -- | 144.7254    | 148.9238    | 156.3708    |

|                |           |           |           |
|----------------|-----------|-----------|-----------|
| Frequencies -- | 158.7667  | 161.6421  | 168.4427  |
| Frequencies -- | 169.9113  | 174.7092  | 182.0146  |
| Frequencies -- | 191.4341  | 194.5202  | 204.1626  |
| Frequencies -- | 209.0847  | 212.1099  | 215.0989  |
| Frequencies -- | 218.2718  | 223.1864  | 223.4735  |
| Frequencies -- | 232.2742  | 242.5019  | 246.9276  |
| Frequencies -- | 252.8477  | 259.0832  | 263.1019  |
| Frequencies -- | 264.0946  | 265.1008  | 265.1493  |
| Frequencies -- | 273.8709  | 275.0266  | 275.7914  |
| Frequencies -- | 280.7429  | 285.6060  | 290.0515  |
| Frequencies -- | 296.5080  | 302.5842  | 303.0984  |
| Frequencies -- | 307.6446  | 308.4912  | 314.8388  |
| Frequencies -- | 322.2091  | 325.8383  | 329.8256  |
| Frequencies -- | 332.5828  | 338.0614  | 358.1490  |
| Frequencies -- | 365.7957  | 372.7631  | 375.4776  |
| Frequencies -- | 378.1847  | 381.1963  | 386.6904  |
| Frequencies -- | 392.1628  | 397.4045  | 404.3071  |
| Frequencies -- | 404.7518  | 405.9881  | 410.3514  |
| Frequencies -- | 413.5432  | 416.1455  | 432.0069  |
| Frequencies -- | 433.0218  | 433.4843  | 434.2964  |
| Frequencies -- | 451.2300  | 456.8353  | 462.9697  |
| Frequencies -- | 483.6650  | 498.5890  | 512.3047  |
| Frequencies -- | 516.4711  | 528.1602  | 532.5108  |
| Frequencies -- | 534.2876  | 539.7837  | 543.5516  |
| Frequencies -- | 544.9785  | 550.8431  | 552.2832  |
| Frequencies -- | 554.6746  | 576.7143  | 587.2953  |
| Frequencies -- | 594.7475  | 598.6193  | 608.2783  |
| Frequencies -- | 612.6705  | 616.2326  | 617.1522  |
| Frequencies -- | 617.6678  | 620.4594  | 624.8935  |
| Frequencies -- | 633.5205  | 633.7832  | 634.4553  |
| Frequencies -- | 637.4554  | 640.8725  | 641.3508  |
| Frequencies -- | 655.2992  | 655.4069  | 673.6085  |
| Frequencies -- | 687.5469  | 697.3202  | 703.2709  |
| Frequencies -- | 710.1155  | 710.9372  | 711.6624  |
| Frequencies -- | 715.9099  | 717.9028  | 719.8103  |
| Frequencies -- | 732.0037  | 736.3747  | 742.8894  |
| Frequencies -- | 743.7112  | 747.6041  | 759.7257  |
| Frequencies -- | 767.0427  | 773.1466  | 776.1772  |
| Frequencies -- | 778.8618  | 793.0032  | 801.0123  |
| Frequencies -- | 806.2492  | 807.1056  | 836.8559  |
| Frequencies -- | 857.8148  | 859.6153  | 859.9296  |
| Frequencies -- | 866.1940  | 868.7026  | 873.8256  |
| Frequencies -- | 874.4325  | 889.0378  | 902.7024  |
| Frequencies -- | 911.8352  | 912.6855  | 917.3640  |
| Frequencies -- | 931.4190  | 938.1758  | 940.5544  |
| Frequencies -- | 945.3418  | 959.9961  | 968.3650  |
| Frequencies -- | 973.1176  | 986.1657  | 986.3239  |
| Frequencies -- | 991.8204  | 994.2723  | 995.9375  |
| Frequencies -- | 1004.3222 | 1004.8182 | 1006.5368 |
| Frequencies -- | 1009.5023 | 1013.2571 | 1016.4473 |
| Frequencies -- | 1016.5055 | 1020.4876 | 1024.7266 |
| Frequencies -- | 1026.7833 | 1038.9972 | 1039.4033 |
| Frequencies -- | 1039.4668 | 1042.7597 | 1045.8418 |
| Frequencies -- | 1047.2840 | 1047.6710 | 1048.2628 |
| Frequencies -- | 1049.5654 | 1051.4573 | 1052.2679 |
| Frequencies -- | 1054.5185 | 1055.3446 | 1055.9957 |
| Frequencies -- | 1082.2386 | 1087.0814 | 1088.9912 |
| Frequencies -- | 1089.8956 | 1090.7925 | 1091.1956 |
| Frequencies -- | 1091.5913 | 1123.2636 | 1125.6358 |
| Frequencies -- | 1128.5246 | 1174.5413 | 1175.1501 |
| Frequencies -- | 1182.6942 | 1182.9339 | 1184.4903 |
| Frequencies -- | 1185.3352 | 1204.2954 | 1205.3288 |
| Frequencies -- | 1207.2582 | 1207.6798 | 1210.0577 |

|                |           |           |           |
|----------------|-----------|-----------|-----------|
| Frequencies -- | 1212.1399 | 1213.9557 | 1226.6769 |
| Frequencies -- | 1254.3506 | 1260.5207 | 1278.7827 |
| Frequencies -- | 1296.1221 | 1303.5617 | 1318.1493 |
| Frequencies -- | 1320.5121 | 1321.2996 | 1324.2968 |
| Frequencies -- | 1328.8907 | 1330.5571 | 1332.0492 |
| Frequencies -- | 1333.5519 | 1337.6335 | 1343.9838 |
| Frequencies -- | 1351.8099 | 1367.2781 | 1367.5643 |
| Frequencies -- | 1368.5040 | 1369.3043 | 1370.2344 |
| Frequencies -- | 1378.2854 | 1408.9679 | 1410.5341 |
| Frequencies -- | 1414.4662 | 1420.0135 | 1420.5848 |
| Frequencies -- | 1422.1739 | 1426.3541 | 1428.4189 |
| Frequencies -- | 1430.2605 | 1437.3909 | 1440.3091 |
| Frequencies -- | 1443.3970 | 1444.9612 | 1447.5212 |
| Frequencies -- | 1451.3084 | 1453.0794 | 1454.1646 |
| Frequencies -- | 1467.0287 | 1467.8469 | 1469.2510 |
| Frequencies -- | 1471.0425 | 1473.9022 | 1482.8017 |
| Frequencies -- | 1491.4535 | 1493.8945 | 1497.1491 |
| Frequencies -- | 1497.4698 | 1498.6355 | 1500.8205 |
| Frequencies -- | 1502.9062 | 1505.8277 | 1508.4090 |
| Frequencies -- | 1508.7263 | 1509.4361 | 1517.1543 |
| Frequencies -- | 1520.7794 | 1525.2170 | 1531.7496 |
| Frequencies -- | 1591.2351 | 1593.9912 | 1594.9460 |
| Frequencies -- | 1595.6582 | 1596.9908 | 1597.2449 |
| Frequencies -- | 1598.6997 | 1599.9550 | 1617.8493 |
| Frequencies -- | 1620.5936 | 1622.2836 | 1622.4267 |
| Frequencies -- | 1623.8283 | 1623.9408 | 1624.5130 |
| Frequencies -- | 1808.2445 | 2977.8708 | 3009.6150 |
| Frequencies -- | 3010.2812 | 3011.0826 | 3012.6433 |
| Frequencies -- | 3014.4359 | 3058.8086 | 3097.3146 |
| Frequencies -- | 3098.7451 | 3105.1572 | 3107.0241 |
| Frequencies -- | 3115.2633 | 3124.9310 | 3147.7036 |
| Frequencies -- | 3151.4775 | 3151.9149 | 3152.6733 |
| Frequencies -- | 3154.8789 | 3155.5017 | 3159.5019 |
| Frequencies -- | 3160.1892 | 3161.3014 | 3163.2186 |
| Frequencies -- | 3167.9277 | 3169.9267 | 3172.5491 |
| Frequencies -- | 3172.5821 | 3174.0827 | 3174.9523 |
| Frequencies -- | 3182.1529 | 3182.2558 | 3184.0945 |
| Frequencies -- | 3185.6066 | 3186.4897 | 3193.5611 |
| Frequencies -- | 3194.7549 | 3195.1804 | 3198.1992 |
| Frequencies -- | 3199.7669 | 3205.2082 | 3220.9942 |

**Catalyst 17:****distal conformation**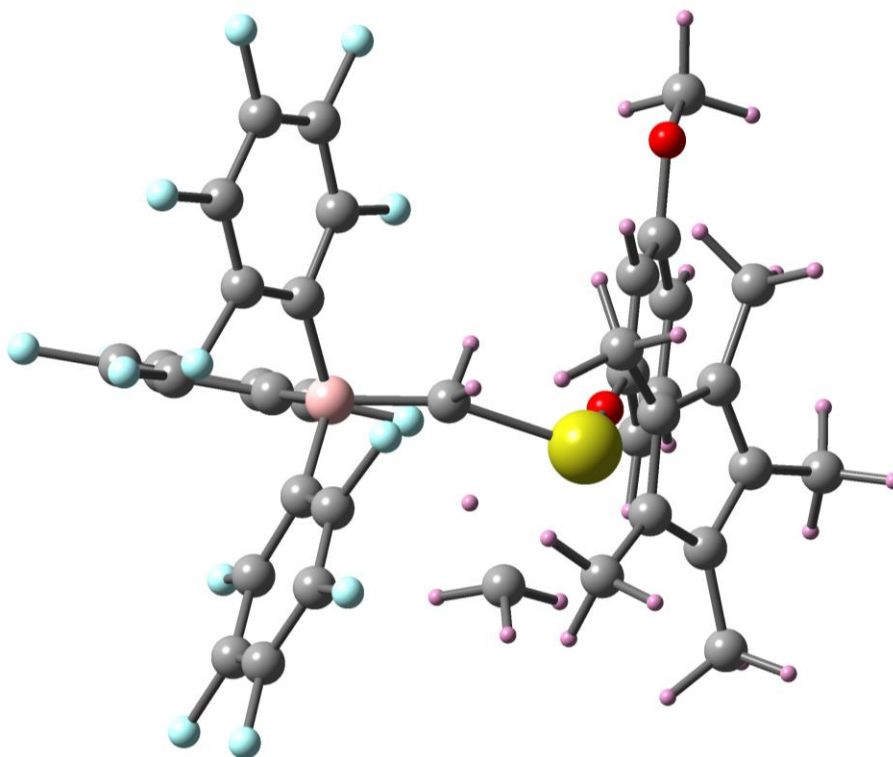

| <b>vacuum</b> | <b>toluene-like solvent</b> | <b>D3 dispersion</b> |
|---------------|-----------------------------|----------------------|
| -3156.8316642 | -3156.8441568               | -0.57036226          |

Imaginary frequency corresponding to vibration along the reaction coordinate:  $-1048 \text{ cm}^{-1}$ .

|    |             |             |             |
|----|-------------|-------------|-------------|
| Ti | -1.66542800 | 1.81110800  | -0.04493300 |
| C  | -0.67684600 | 1.98622100  | -2.14325400 |
| H  | -0.26040200 | 1.20470400  | -2.79500200 |
| H  | -1.68985600 | 2.18849500  | -2.52190400 |
| H  | -0.06331900 | 2.88828100  | -2.22466900 |
| O  | -3.02580300 | 0.74809400  | -0.45636200 |
| C  | -4.14889700 | -0.04206600 | -0.64842800 |
| C  | -4.62191600 | -0.83762000 | 0.41309000  |
| C  | -4.78045600 | -0.05548000 | -1.91751400 |
| C  | -5.75265300 | -1.66469200 | 0.20952300  |
| C  | -5.89961600 | -0.88687800 | -2.10111600 |
| C  | -6.39844600 | -1.69165200 | -1.05251800 |
| H  | -6.38980500 | -0.91737700 | -3.07638800 |
| H  | -7.26440200 | -2.32572700 | -1.23133400 |
| C  | -1.18717400 | 3.38978500  | 1.78097600  |
| C  | -0.84849400 | 4.10024800  | 0.58072900  |
| C  | -2.60506200 | 3.05433000  | 1.72011400  |
| C  | -2.05403100 | 4.21768200  | -0.22725100 |
| C  | -3.14572300 | 3.61420300  | 0.50137800  |
| F  | 0.39800600  | -5.43601800 | -3.13693600 |
| C  | 0.60382100  | -4.25163000 | -2.44319100 |

|   |             |             |             |
|---|-------------|-------------|-------------|
| C | 1.84350200  | -3.97928300 | -1.83996400 |
| C | -0.41818200 | -3.29668500 | -2.33714400 |
| C | 2.02076800  | -2.77161700 | -1.14118300 |
| F | 2.87980800  | -4.89985900 | -1.94717800 |
| C | -0.18282500 | -2.10339500 | -1.62524300 |
| F | -1.65185400 | -3.53160200 | -2.93913400 |
| C | 1.02677200  | -1.77437300 | -0.98088600 |
| F | 3.29940600  | -2.56358700 | -0.61140000 |
| F | -1.26364800 | -1.20603900 | -1.61255900 |
| B | 1.33348500  | -0.41662700 | -0.05870100 |
| C | 1.83464100  | -1.03687600 | 1.42932000  |
| C | 2.44350400  | 0.60973100  | -0.76957700 |
| C | -0.00435000 | 0.55934600  | 0.28308300  |
| C | 3.14817200  | -1.01852000 | 1.95901100  |
| C | 0.91467900  | -1.70693300 | 2.27195900  |
| C | 2.87693900  | 0.55374700  | -2.11474400 |
| C | 2.98453700  | 1.71445600  | -0.07077200 |
| H | -0.82871500 | -0.09758600 | 0.63883800  |
| H | 0.34238400  | 1.23742300  | 1.08189100  |
| H | -0.26266100 | 1.27939700  | -1.07099500 |
| C | 3.50971700  | -1.56209200 | 3.20920500  |
| F | 4.20770300  | -0.46348400 | 1.23755500  |
| C | 1.22264600  | -2.26820600 | 3.52533100  |
| F | -0.42497100 | -1.87813000 | 1.86333200  |
| C | 3.79388100  | 1.45515700  | -2.69761100 |
| F | 2.38002800  | -0.41873500 | -2.99389700 |
| C | 3.89463700  | 2.64415300  | -0.59958500 |
| F | 2.60775600  | 1.94251900  | 1.26721900  |
| C | 2.53888400  | -2.18806300 | 4.00719900  |
| F | 4.82358500  | -1.49127300 | 3.65826600  |
| F | 0.24077800  | -2.89792000 | 4.28570300  |
| C | 4.31684600  | 2.50918900  | -1.93282000 |
| F | 4.16982400  | 1.31922600  | -4.02930400 |
| F | 4.36720900  | 3.70004400  | 0.17576000  |
| F | 2.87393400  | -2.72532500 | 5.24224600  |
| F | 5.21107800  | 3.41404500  | -2.48702600 |
| C | -2.19004400 | 5.04151600  | -1.48743700 |
| H | -2.44400000 | 6.08345500  | -1.22558900 |
| H | -1.26112300 | 5.07665100  | -2.07065400 |
| H | -2.98785500 | 4.67318700  | -2.14741200 |
| C | 0.47577600  | 4.75891500  | 0.27046800  |
| H | 0.72853300  | 4.72412400  | -0.79827800 |
| H | 0.43037200  | 5.82621700  | 0.54960200  |
| H | 1.30634200  | 4.31418500  | 0.82834900  |
| C | -0.29666500 | 3.15373200  | 2.98026700  |
| H | 0.76897700  | 3.18905800  | 2.72824500  |
| H | -0.48208400 | 3.93746900  | 3.73506400  |
| H | -0.49316300 | 2.18862500  | 3.46944700  |
| C | -3.39933300 | 2.41884400  | 2.84086300  |
| H | -2.82004800 | 1.66419600  | 3.39193400  |
| H | -3.69775000 | 3.18963900  | 3.57285900  |
| H | -4.31816300 | 1.93870100  | 2.48107300  |
| C | -4.60289100 | 3.64362600  | 0.10199000  |
| H | -5.16592900 | 2.79634100  | 0.51249200  |
| H | -5.07393200 | 4.56690400  | 0.48263400  |
| H | -4.73934700 | 3.63647200  | -0.98798700 |
| H | -4.12054300 | -0.85006300 | 1.37900600  |

|                |             |             |             |
|----------------|-------------|-------------|-------------|
| H              | -4.38523900 | 0.54804700  | -2.73329200 |
| O              | -6.13766200 | -2.40739200 | 1.33001000  |
| C              | -7.24716700 | -3.35889700 | 1.20657300  |
| H              | -7.03231100 | -4.12800500 | 0.44615300  |
| H              | -7.32432200 | -3.82840400 | 2.19450500  |
| H              | -8.19342200 | -2.84557400 | 0.96537200  |
| Frequencies -- | -1047.6404  | 7.8688      | 8.6553      |
| Frequencies -- | 15.6352     | 22.8386     | 26.2622     |
| Frequencies -- | 27.6205     | 29.2547     | 32.3732     |
| Frequencies -- | 37.2594     | 40.2770     | 44.8019     |
| Frequencies -- | 49.4473     | 53.8410     | 69.6819     |
| Frequencies -- | 80.1304     | 93.9048     | 99.3311     |
| Frequencies -- | 99.8145     | 104.5411    | 109.6029    |
| Frequencies -- | 111.9342    | 112.9731    | 119.6589    |
| Frequencies -- | 120.5961    | 124.5442    | 128.5299    |
| Frequencies -- | 131.3060    | 136.8898    | 142.7120    |
| Frequencies -- | 144.3104    | 146.3765    | 150.0824    |
| Frequencies -- | 154.3519    | 157.4525    | 160.1702    |
| Frequencies -- | 161.6417    | 163.4125    | 169.3100    |
| Frequencies -- | 173.9888    | 186.1025    | 190.8985    |
| Frequencies -- | 194.6546    | 210.6614    | 216.8427    |
| Frequencies -- | 219.6168    | 224.0860    | 228.3178    |
| Frequencies -- | 235.8687    | 252.0998    | 258.4590    |
| Frequencies -- | 264.2231    | 264.8546    | 265.1535    |
| Frequencies -- | 274.6815    | 275.7739    | 277.8678    |
| Frequencies -- | 286.2832    | 289.6165    | 295.4820    |
| Frequencies -- | 299.4818    | 302.1060    | 303.4312    |
| Frequencies -- | 305.6729    | 308.1274    | 322.7906    |
| Frequencies -- | 326.2883    | 328.1751    | 334.3194    |
| Frequencies -- | 345.6170    | 362.1315    | 372.5233    |
| Frequencies -- | 377.4187    | 378.6566    | 379.3855    |
| Frequencies -- | 380.9109    | 391.1467    | 393.2273    |
| Frequencies -- | 400.9152    | 410.5802    | 431.2473    |
| Frequencies -- | 432.2387    | 433.8593    | 450.7023    |
| Frequencies -- | 452.7864    | 456.8495    | 464.1857    |
| Frequencies -- | 474.5633    | 486.0173    | 531.3942    |
| Frequencies -- | 534.9518    | 536.8051    | 537.7342    |
| Frequencies -- | 544.9997    | 554.3075    | 554.6634    |
| Frequencies -- | 559.5133    | 570.7251    | 582.3280    |
| Frequencies -- | 595.2934    | 599.8869    | 601.9893    |
| Frequencies -- | 607.0243    | 610.6249    | 635.4733    |
| Frequencies -- | 636.6933    | 638.7269    | 643.5085    |
| Frequencies -- | 654.8697    | 655.2613    | 672.6199    |
| Frequencies -- | 675.0586    | 702.4114    | 718.7131    |
| Frequencies -- | 723.5256    | 734.2644    | 747.5861    |
| Frequencies -- | 748.9756    | 756.9880    | 762.6486    |
| Frequencies -- | 771.4095    | 783.7453    | 800.1171    |
| Frequencies -- | 803.4456    | 828.9169    | 845.0389    |
| Frequencies -- | 862.3110    | 871.6378    | 879.3921    |
| Frequencies -- | 887.1044    | 904.0107    | 913.3982    |
| Frequencies -- | 920.0982    | 953.1751    | 959.3806    |
| Frequencies -- | 968.6933    | 969.9056    | 987.5685    |
| Frequencies -- | 1014.8451   | 1019.7887   | 1025.4088   |
| Frequencies -- | 1029.8089   | 1039.0279   | 1041.7149   |
| Frequencies -- | 1044.9553   | 1045.5391   | 1046.2950   |
| Frequencies -- | 1048.3305   | 1051.1271   | 1054.2957   |
| Frequencies -- | 1057.5487   | 1087.6965   | 1087.9548   |
| Frequencies -- | 1099.4656   | 1102.0647   | 1125.1250   |
| Frequencies -- | 1126.5192   | 1165.5429   | 1170.9113   |
| Frequencies -- | 1174.1023   | 1175.2779   | 1200.9154   |
| Frequencies -- | 1209.8757   | 1212.8955   | 1215.9057   |

|                |           |           |           |
|----------------|-----------|-----------|-----------|
| Frequencies -- | 1267.5734 | 1273.7402 | 1300.1425 |
| Frequencies -- | 1302.9675 | 1317.3874 | 1319.9591 |
| Frequencies -- | 1325.5393 | 1337.5751 | 1343.7938 |
| Frequencies -- | 1350.0646 | 1352.5972 | 1386.4117 |
| Frequencies -- | 1409.0831 | 1411.4267 | 1413.4388 |
| Frequencies -- | 1419.3670 | 1422.2336 | 1422.8913 |
| Frequencies -- | 1425.6568 | 1426.9544 | 1429.8487 |
| Frequencies -- | 1435.7458 | 1446.2929 | 1448.9518 |
| Frequencies -- | 1452.6287 | 1455.5183 | 1463.8503 |
| Frequencies -- | 1467.0055 | 1468.6280 | 1469.9003 |
| Frequencies -- | 1471.2804 | 1481.8628 | 1482.8914 |
| Frequencies -- | 1484.7428 | 1487.8832 | 1488.3134 |
| Frequencies -- | 1490.7046 | 1497.8500 | 1498.5217 |
| Frequencies -- | 1499.3596 | 1503.9160 | 1509.0370 |
| Frequencies -- | 1510.1567 | 1514.3594 | 1525.7680 |
| Frequencies -- | 1591.0232 | 1594.2174 | 1596.2758 |
| Frequencies -- | 1598.7254 | 1617.0597 | 1618.9019 |
| Frequencies -- | 1620.3228 | 1622.4394 | 1830.4676 |
| Frequencies -- | 2935.8071 | 2996.2978 | 3008.4394 |
| Frequencies -- | 3010.2201 | 3011.5109 | 3013.2211 |
| Frequencies -- | 3014.2703 | 3032.9085 | 3081.8719 |
| Frequencies -- | 3095.6428 | 3096.2808 | 3098.9763 |
| Frequencies -- | 3099.1419 | 3100.8957 | 3103.0454 |
| Frequencies -- | 3129.0511 | 3139.3184 | 3141.3606 |
| Frequencies -- | 3148.3098 | 3156.9608 | 3160.9585 |
| Frequencies -- | 3169.3836 | 3173.8173 | 3193.3129 |
| Frequencies -- | 3208.3955 | 3217.8762 | 3220.5804 |

**proximal conformation**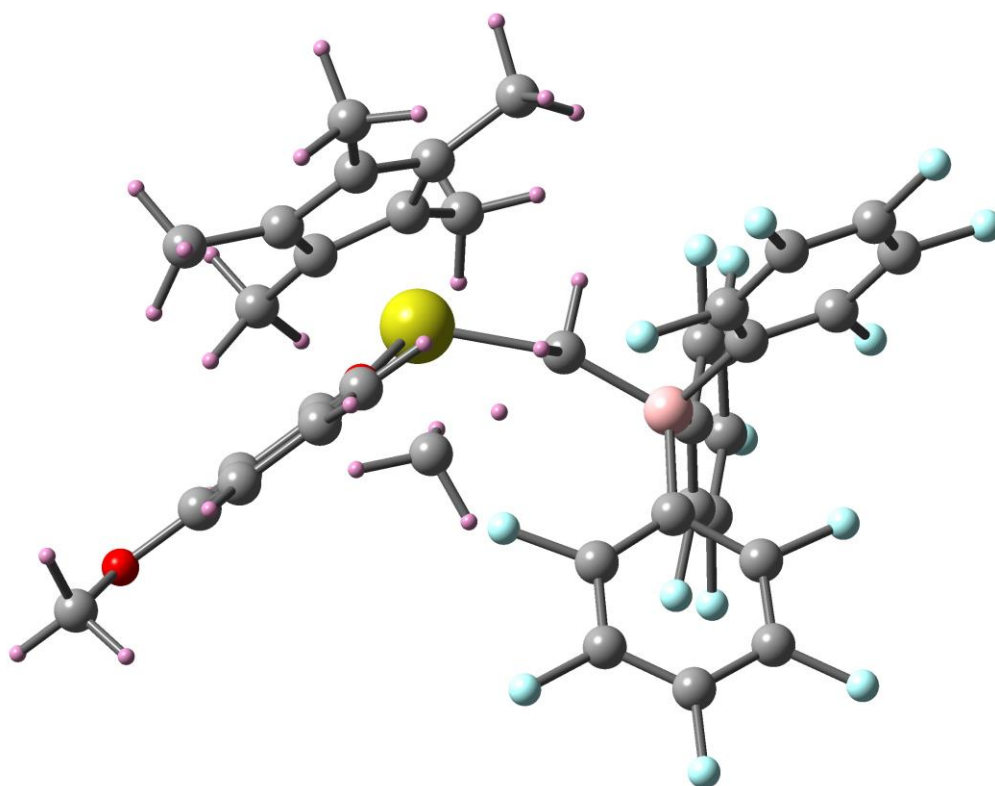

| <b>vacuum</b> | <b>toluene-like solvent</b> | <b>D3 dispersion</b> |
|---------------|-----------------------------|----------------------|
| -3156.8319503 | -3156.8446291               | -0.57062786          |

Imaginary frequency corresponding to vibration along the reaction coordinate:  $-1066 \text{ cm}^{-1}$ .

|    |             |             |             |
|----|-------------|-------------|-------------|
| Ti | 1.73228300  | -1.66971000 | 0.14009400  |
| C  | 1.11266500  | -1.59832200 | -2.09773700 |
| H  | 0.72462600  | -0.76853300 | -2.70573700 |
| H  | 2.18711600  | -1.66175000 | -2.32665900 |
| H  | 0.61111700  | -2.52505100 | -2.39168300 |
| O  | 3.04867800  | -0.47794200 | 0.14088900  |
| C  | 4.06618900  | 0.44271200  | 0.34118500  |
| C  | 3.99329400  | 1.33144300  | 1.44410600  |
| C  | 5.13569600  | 0.49534700  | -0.57303500 |
| C  | 5.01943500  | 2.27782500  | 1.61088200  |
| C  | 6.15814100  | 1.45674500  | -0.38822700 |
| C  | 6.10457500  | 2.35273700  | 0.70929500  |
| H  | 4.97267700  | 2.97537900  | 2.44962100  |
| H  | 6.87809200  | 3.10159500  | 0.86679100  |
| C  | 1.08898600  | -3.50998200 | 1.63799600  |
| C  | 1.00090800  | -4.06286800 | 0.31611300  |
| C  | 2.46939100  | -3.09606300 | 1.86237900  |
| C  | 2.32551300  | -4.00148000 | -0.28458800 |
| C  | 3.23806200  | -3.45126900 | 0.69134900  |
| F  | -0.31995600 | 5.79052000  | -2.35664000 |
| C  | -0.55235800 | 4.51852800  | -1.85231600 |
| C  | -1.84841000 | 4.11719100  | -1.48605600 |



|   |             |             |             |
|---|-------------|-------------|-------------|
| C | 0.50009300  | 3.60262300  | -1.70635000 |
| C | -2.05185600 | 2.82306100  | -0.97409900 |
| F | -2.91307000 | 4.99772000  | -1.64106500 |
| C | 0.23598800  | 2.31829700  | -1.18989600 |
| F | 1.79222700  | 3.96592900  | -2.07673300 |
| C | -1.03252400 | 1.85726100  | -0.78375500 |
| F | -3.37958800 | 2.49389700  | -0.67848300 |
| F | 1.35465900  | 1.47165000  | -1.12292100 |
| B | -1.38590400 | 0.37855200  | -0.09337200 |
| C | -2.14562500 | 0.77702800  | 1.36137100  |
| C | -2.30394800 | -0.59705100 | -1.08983800 |
| C | -0.05669800 | -0.57394400 | 0.34009600  |
| C | -3.52129400 | 0.63268700  | 1.66724100  |
| C | -1.41196500 | 1.37126500  | 2.41664200  |
| C | -2.52932500 | -0.38794900 | -2.47037700 |
| C | -2.87193500 | -1.80607400 | -0.62367800 |
| H | 0.64271300  | 0.06414900  | 0.92367300  |
| H | -0.48173800 | -1.37702400 | 0.96574100  |
| H | 0.47428500  | -1.07169300 | -1.02885000 |
| C | -4.10499900 | 0.99064400  | 2.90027900  |
| F | -4.41956400 | 0.13409400  | 0.72155800  |
| C | -1.94404500 | 1.74888100  | 3.66359000  |
| F | -0.03804100 | 1.65615800  | 2.25440700  |
| C | -3.28314000 | -1.24921000 | -3.29675400 |
| F | -1.97279800 | 0.71437800  | -3.13402200 |
| C | -3.62552600 | -2.70181100 | -1.39957600 |
| F | -2.69475600 | -2.18387000 | 0.72177900  |
| C | -3.31056600 | 1.54825200  | 3.91478100  |
| F | -5.46501200 | 0.80435400  | 3.11982300  |
| F | -1.13250100 | 2.31621600  | 4.64303500  |
| C | -3.84526600 | -2.41660600 | -2.75765500 |
| F | -3.45939600 | -0.96032900 | -4.64528400 |
| F | -4.14179500 | -3.86877400 | -0.84195400 |
| F | -3.86468300 | 1.90320500  | 5.13662200  |
| F | -4.58105000 | -3.28379900 | -3.55262200 |
| C | 2.72379500  | -4.62458100 | -1.60351300 |
| H | 3.06731400  | -5.66054600 | -1.43847100 |
| H | 1.88821600  | -4.67348100 | -2.31293300 |
| H | 3.54813100  | -4.08674700 | -2.09310200 |
| C | -0.20566300 | -4.73453000 | -0.29823200 |
| H | -0.29259800 | -4.54857100 | -1.37775700 |
| H | -0.12371900 | -5.82824000 | -0.17147000 |
| H | -1.14417900 | -4.42447800 | 0.17352200  |
| C | 0.00354600  | -3.49017000 | 2.69096500  |
| H | -1.00213100 | -3.56081800 | 2.26205500  |
| H | 0.13326700  | -4.35169700 | 3.36863800  |
| H | 0.03777000  | -2.58613200 | 3.31631900  |
| C | 3.02376800  | -2.57989500 | 3.17270500  |
| H | 2.30774100  | -1.94031600 | 3.70839000  |
| H | 3.25854100  | -3.42673500 | 3.84116200  |
| H | 3.94957600  | -2.00524700 | 3.03763400  |
| C | 4.73933400  | -3.35851300 | 0.54765300  |
| H | 5.16690300  | -2.53032300 | 1.12627300  |
| H | 5.20365700  | -4.29034000 | 0.91560500  |
| H | 5.05360400  | -3.23262700 | -0.49721800 |
| H | 3.14646800  | 1.29243100  | 2.12785900  |
| H | 5.18012400  | -0.17420000 | -1.42966300 |

|                |            |            |             |
|----------------|------------|------------|-------------|
| O              | 7.17051200 | 1.42259800 | -1.35372000 |
| C              | 8.24493700 | 2.41933500 | -1.28977900 |
| H              | 8.88336500 | 2.19929900 | -2.15380600 |
| H              | 7.84633300 | 3.44398500 | -1.37421200 |
| H              | 8.83139300 | 2.31991800 | -0.36076800 |
| Frequencies -- | -1066.4401 | 8.7735     | 14.9745     |
| Frequencies -- | 15.7474    | 22.6927    | 25.6137     |
| Frequencies -- | 28.7138    | 29.8157    | 32.3210     |
| Frequencies -- | 36.8228    | 41.4474    | 48.4255     |
| Frequencies -- | 49.9273    | 59.3630    | 67.7066     |
| Frequencies -- | 80.4365    | 97.5373    | 101.1891    |
| Frequencies -- | 109.9840   | 113.4556   | 114.3556    |
| Frequencies -- | 117.2946   | 121.4944   | 124.3903    |
| Frequencies -- | 125.3128   | 126.3354   | 130.8726    |
| Frequencies -- | 136.8798   | 137.9650   | 140.0863    |
| Frequencies -- | 143.0020   | 144.8679   | 148.3838    |
| Frequencies -- | 154.9405   | 157.0767   | 160.4035    |
| Frequencies -- | 161.7025   | 164.9272   | 172.8730    |
| Frequencies -- | 175.7154   | 184.9016   | 193.9858    |
| Frequencies -- | 196.6925   | 212.3460   | 217.9350    |
| Frequencies -- | 218.3245   | 224.1526   | 228.1377    |
| Frequencies -- | 235.4797   | 256.6135   | 258.4770    |
| Frequencies -- | 264.5431   | 264.5885   | 265.2383    |
| Frequencies -- | 274.4971   | 275.6323   | 277.5452    |
| Frequencies -- | 283.6039   | 288.6945   | 291.9718    |
| Frequencies -- | 295.6260   | 302.3357   | 304.0973    |
| Frequencies -- | 305.0806   | 306.0042   | 320.7237    |
| Frequencies -- | 326.7350   | 327.1074   | 333.8060    |
| Frequencies -- | 349.6549   | 359.8575   | 370.4020    |
| Frequencies -- | 377.1229   | 378.0205   | 378.6838    |
| Frequencies -- | 380.9802   | 393.1433   | 394.6442    |
| Frequencies -- | 400.5094   | 410.1881   | 431.3821    |
| Frequencies -- | 431.9692   | 433.8855   | 450.6591    |
| Frequencies -- | 452.5270   | 456.5898   | 464.1800    |
| Frequencies -- | 472.7215   | 481.6114   | 531.7154    |
| Frequencies -- | 535.0015   | 537.2645   | 537.2983    |
| Frequencies -- | 544.6981   | 554.0536   | 555.4848    |
| Frequencies -- | 558.6890   | 570.4877   | 581.7996    |
| Frequencies -- | 593.8298   | 599.0154   | 601.4290    |
| Frequencies -- | 607.0683   | 610.7049   | 635.0953    |
| Frequencies -- | 636.3711   | 638.4434   | 643.2486    |
| Frequencies -- | 654.3549   | 657.6017   | 671.2675    |
| Frequencies -- | 675.3431   | 697.3422   | 718.7595    |
| Frequencies -- | 723.1183   | 733.7193   | 746.8161    |
| Frequencies -- | 749.2656   | 759.1729   | 762.4522    |
| Frequencies -- | 771.4213   | 780.9689   | 800.8822    |
| Frequencies -- | 802.8503   | 831.8280   | 844.0385    |
| Frequencies -- | 865.3288   | 870.2823   | 876.8270    |
| Frequencies -- | 886.4897   | 904.2696   | 913.7170    |
| Frequencies -- | 919.5858   | 952.4669   | 963.6877    |
| Frequencies -- | 968.0169   | 969.8069   | 988.0913    |
| Frequencies -- | 1018.1315  | 1019.6901  | 1023.9059   |
| Frequencies -- | 1030.4114  | 1039.6564  | 1042.0238   |
| Frequencies -- | 1043.9104  | 1045.6705  | 1046.2865   |
| Frequencies -- | 1048.4707  | 1050.7362  | 1055.6365   |
| Frequencies -- | 1058.8546  | 1087.0138  | 1087.8198   |
| Frequencies -- | 1100.2287  | 1104.0996  | 1125.1530   |
| Frequencies -- | 1126.5673  | 1162.7410  | 1170.5533   |
| Frequencies -- | 1173.3178  | 1174.6876  | 1200.7209   |
| Frequencies -- | 1209.4273  | 1213.1073  | 1215.9346   |
| Frequencies -- | 1267.3973  | 1271.8099  | 1299.0287   |

|                |           |           |           |
|----------------|-----------|-----------|-----------|
| Frequencies -- | 1302.3732 | 1316.4894 | 1320.4485 |
| Frequencies -- | 1326.0058 | 1337.4717 | 1344.2085 |
| Frequencies -- | 1350.0686 | 1354.0189 | 1386.5706 |
| Frequencies -- | 1409.0218 | 1411.5674 | 1412.9511 |
| Frequencies -- | 1419.8992 | 1422.3064 | 1423.6193 |
| Frequencies -- | 1425.9799 | 1426.7569 | 1428.6622 |
| Frequencies -- | 1434.5767 | 1447.4973 | 1449.6916 |
| Frequencies -- | 1452.0022 | 1456.7011 | 1464.6983 |
| Frequencies -- | 1467.1381 | 1467.8764 | 1469.5380 |
| Frequencies -- | 1471.2149 | 1481.4529 | 1483.8662 |
| Frequencies -- | 1484.8335 | 1485.2910 | 1488.1161 |
| Frequencies -- | 1490.8308 | 1496.1886 | 1498.9555 |
| Frequencies -- | 1499.8040 | 1505.1185 | 1508.1910 |
| Frequencies -- | 1509.7223 | 1513.1857 | 1526.6334 |
| Frequencies -- | 1590.3481 | 1594.1699 | 1596.3760 |
| Frequencies -- | 1598.5514 | 1617.0683 | 1620.0177 |
| Frequencies -- | 1620.4982 | 1622.4425 | 1821.3304 |
| Frequencies -- | 2938.8400 | 2996.9302 | 3006.5659 |
| Frequencies -- | 3010.0920 | 3011.7987 | 3013.1107 |
| Frequencies -- | 3014.5477 | 3032.7257 | 3084.6536 |
| Frequencies -- | 3094.6652 | 3096.6941 | 3098.3658 |
| Frequencies -- | 3098.8866 | 3102.1710 | 3103.3412 |
| Frequencies -- | 3128.8193 | 3134.5378 | 3142.1511 |
| Frequencies -- | 3148.6384 | 3156.9569 | 3160.2309 |
| Frequencies -- | 3166.0427 | 3175.4164 | 3191.4106 |
| Frequencies -- | 3209.4785 | 3218.3557 | 3221.1433 |

**Catalyst 18:**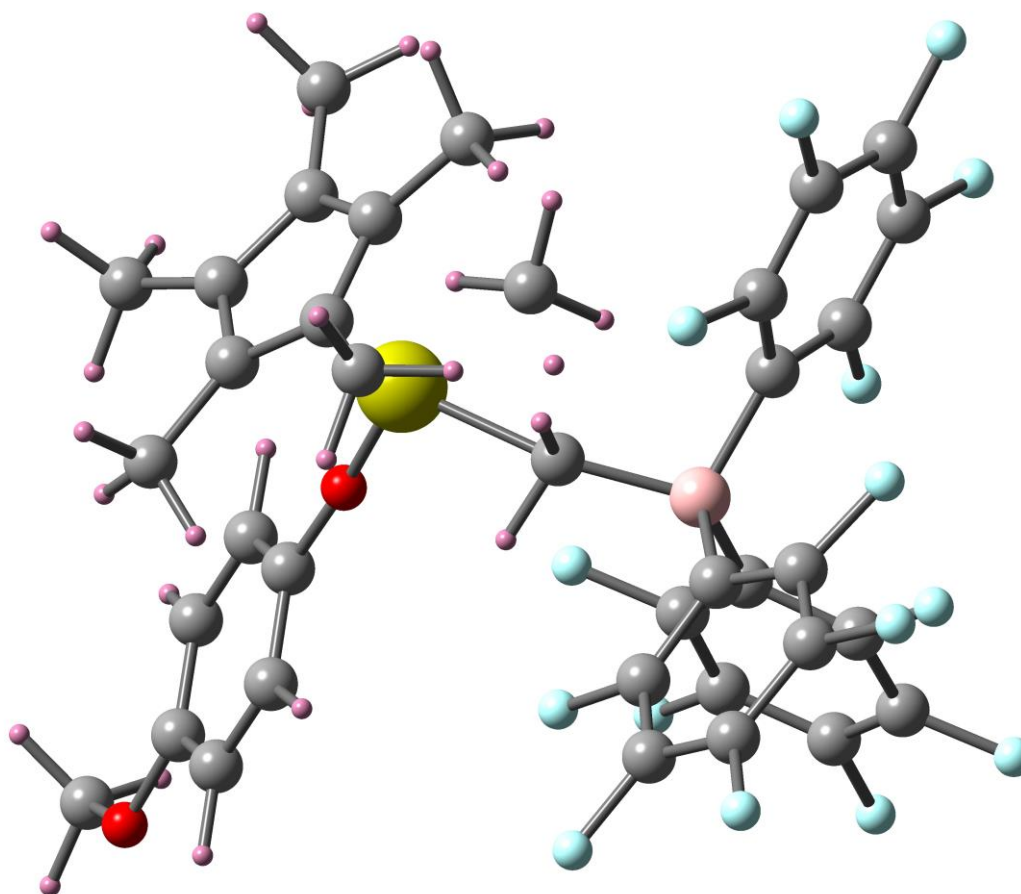

| vacuum        | toluene-like solvent | D3 dispersion |
|---------------|----------------------|---------------|
| -3156.8305231 | -3156.8435677        | -0.57052281   |

Imaginary frequency corresponding to vibration along the reaction coordinate:  $-912\text{ cm}^{-1}$ .

|    |             |             |             |
|----|-------------|-------------|-------------|
| Ti | -1.58671700 | 1.82703200  | 0.05581900  |
| C  | -0.86382400 | 1.74614500  | -2.15839300 |
| H  | -0.56557700 | 0.88878100  | -2.77864600 |
| H  | -1.91733700 | 1.94661900  | -2.40324500 |
| H  | -0.25102900 | 2.61363300  | -2.42102200 |
| O  | -2.98929300 | 0.74515900  | -0.06074900 |
| C  | -4.13191600 | -0.03484900 | -0.00344200 |
| C  | -4.31952200 | -0.93421300 | 1.07807000  |
| C  | -5.09258800 | 0.04270700  | -1.03561600 |
| C  | -5.46726900 | -1.73655900 | 1.12331800  |
| C  | -6.24444700 | -0.76769200 | -0.99428000 |
| C  | -6.43886100 | -1.66059100 | 0.09009500  |
| H  | -5.62667800 | -2.43890700 | 1.94105300  |
| H  | -6.96564000 | -0.69834600 | -1.80680600 |
| C  | -0.99298100 | 3.51501600  | 1.73510700  |
| C  | -0.61056500 | 4.09606000  | 0.47876600  |
| C  | -2.43328000 | 3.28704900  | 1.70930600  |
| C  | -1.80835600 | 4.23294200  | -0.33273200 |
| C  | -2.93674500 | 3.77185400  | 0.44428200  |

|   |             |             |             |
|---|-------------|-------------|-------------|
| F | 0.02179500  | -5.73267100 | -2.47403300 |
| C | 0.32072100  | -4.48901400 | -1.93525500 |
| C | 1.62626800  | -4.18361900 | -1.51446300 |
| C | -0.67181200 | -3.50596200 | -1.80854300 |
| C | 1.89746500  | -2.91538100 | -0.97021300 |
| F | 2.63393500  | -5.13212300 | -1.64844600 |
| C | -0.34133400 | -2.25201600 | -1.25668500 |
| F | -1.97094100 | -3.77308000 | -2.23360800 |
| C | 0.93952500  | -1.88533100 | -0.79721500 |
| F | 3.23277500  | -2.68275800 | -0.62154900 |
| F | -1.40320700 | -1.33365200 | -1.21253300 |
| B | 1.36830900  | -0.44590000 | -0.06710700 |
| C | 2.03870500  | -0.92086200 | 1.40914300  |
| C | 2.39828500  | 0.47027900  | -1.01146600 |
| C | 0.09678200  | 0.59568200  | 0.32829500  |
| C | 3.40728200  | -0.88123000 | 1.77285100  |
| C | 1.22065500  | -1.47405600 | 2.42414000  |
| C | 2.65794600  | 0.26241500  | -2.38637600 |
| C | 3.04661500  | 1.62192700  | -0.50489800 |
| H | -0.67408400 | 0.00253500  | 0.86918200  |
| H | 0.55529400  | 1.34870200  | 0.99132900  |
| H | -0.33306400 | 1.16995200  | -1.09447000 |
| C | 3.91168300  | -1.29547600 | 3.02314600  |
| F | 4.37849000  | -0.43774000 | 0.87258000  |
| C | 1.67179900  | -1.90444800 | 3.68584600  |
| F | -0.16159000 | -1.65718800 | 2.20120500  |
| C | 3.51517100  | 1.06524600  | -3.16943100 |
| F | 2.03348800  | -0.77697000 | -3.09079400 |
| C | 3.90626100  | 2.45757300  | -1.23716700 |
| F | 2.84767200  | 2.00117800  | 0.83616200  |
| C | 3.03743100  | -1.80583900 | 3.99588400  |
| F | 5.27131500  | -1.21072400 | 3.30083500  |
| F | 0.78168200  | -2.42354600 | 4.62271700  |
| C | 4.15527000  | 2.17144900  | -2.59006000 |
| F | 3.71744400  | 0.78028200  | -4.51536000 |
| F | 4.50073000  | 3.56719000  | -0.64193800 |
| F | 3.51305900  | -2.21402600 | 5.23414400  |
| F | 4.99526000  | 2.98081900  | -3.34170300 |
| C | -1.88844100 | 4.95674900  | -1.65796100 |
| H | -2.21831500 | 5.99766100  | -1.49822000 |
| H | -0.91604400 | 5.00059900  | -2.16390500 |
| H | -2.60741500 | 4.49852000  | -2.35228600 |
| C | 0.75935100  | 4.61823500  | 0.10769800  |
| H | 1.17177300  | 4.15080600  | -0.79779300 |
| H | 0.70840900  | 5.70235200  | -0.08534700 |
| H | 1.48446900  | 4.45954200  | 0.91312200  |
| C | -0.09602300 | 3.30183600  | 2.93534300  |
| H | 0.88901900  | 2.89828000  | 2.66829600  |
| H | 0.07424200  | 4.26478800  | 3.44634000  |
| H | -0.54466600 | 2.62105800  | 3.67088200  |
| C | -3.26710900 | 2.81062700  | 2.87960300  |
| H | -2.77344300 | 2.01281800  | 3.45299500  |
| H | -3.44515600 | 3.64579300  | 3.57924000  |
| H | -4.24889700 | 2.43383300  | 2.56499200  |
| C | -4.38877700 | 3.88318800  | 0.03902000  |
| H | -5.01465400 | 3.10611000  | 0.49526400  |
| H | -4.79087700 | 4.85925800  | 0.36287200  |

|                |             |             |             |
|----------------|-------------|-------------|-------------|
| H              | -4.52265400 | 3.82622400  | -1.05032000 |
| H              | -3.56366800 | -1.01063800 | 1.86003300  |
| H              | -4.93249600 | 0.72084600  | -1.87435500 |
| O              | -7.53625300 | -2.51078000 | 0.25001500  |
| C              | -8.56736600 | -2.54788400 | -0.79231700 |
| H              | -8.14651100 | -2.86576800 | -1.76083500 |
| H              | -9.29248200 | -3.29266300 | -0.44333400 |
| H              | -9.06507300 | -1.56930100 | -0.90114800 |
| Frequencies -- | -911.6770   | 3.9781      | 13.1114     |
| Frequencies -- | 16.5865     | 17.4751     | 20.0508     |
| Frequencies -- | 27.3643     | 29.4915     | 31.2713     |
| Frequencies -- | 36.3617     | 40.9339     | 47.3259     |
| Frequencies -- | 48.9339     | 53.5520     | 67.8354     |
| Frequencies -- | 75.0095     | 76.6738     | 94.8984     |
| Frequencies -- | 99.3315     | 99.9177     | 108.7491    |
| Frequencies -- | 110.6855    | 113.6747    | 116.6626    |
| Frequencies -- | 118.2031    | 118.3742    | 119.4620    |
| Frequencies -- | 123.4024    | 126.6131    | 128.8023    |
| Frequencies -- | 138.7492    | 142.6545    | 142.9244    |
| Frequencies -- | 145.9710    | 155.5971    | 158.1283    |
| Frequencies -- | 159.5764    | 161.4846    | 169.8121    |
| Frequencies -- | 173.6280    | 189.2303    | 191.8305    |
| Frequencies -- | 204.9861    | 208.3774    | 215.7212    |
| Frequencies -- | 217.6091    | 223.6042    | 226.4915    |
| Frequencies -- | 227.2127    | 251.3374    | 264.4541    |
| Frequencies -- | 264.5105    | 264.8913    | 270.4511    |
| Frequencies -- | 274.9378    | 275.8397    | 278.1646    |
| Frequencies -- | 280.1754    | 285.9417    | 290.8304    |
| Frequencies -- | 293.0476    | 299.9836    | 302.7095    |
| Frequencies -- | 304.6571    | 307.7311    | 325.3090    |
| Frequencies -- | 326.4173    | 332.9542    | 341.0660    |
| Frequencies -- | 359.6873    | 364.6337    | 372.6325    |
| Frequencies -- | 377.2673    | 378.3771    | 381.0479    |
| Frequencies -- | 390.5608    | 394.4176    | 397.2171    |
| Frequencies -- | 408.5086    | 415.7397    | 420.8556    |
| Frequencies -- | 431.3376    | 431.9155    | 434.2632    |
| Frequencies -- | 449.8142    | 456.9957    | 464.0292    |
| Frequencies -- | 473.2971    | 489.8302    | 516.8399    |
| Frequencies -- | 531.9556    | 535.4042    | 536.6362    |
| Frequencies -- | 539.5917    | 544.6861    | 554.8890    |
| Frequencies -- | 557.0469    | 577.0624    | 580.1588    |
| Frequencies -- | 583.7341    | 592.9534    | 600.0650    |
| Frequencies -- | 600.4600    | 619.7601    | 635.0073    |
| Frequencies -- | 635.7231    | 636.2518    | 638.5691    |
| Frequencies -- | 643.0966    | 654.7526    | 670.2213    |
| Frequencies -- | 694.5093    | 712.7743    | 718.7948    |
| Frequencies -- | 722.9269    | 733.3874    | 746.8128    |
| Frequencies -- | 748.9165    | 762.3299    | 767.7727    |
| Frequencies -- | 771.2664    | 797.9266    | 801.0619    |
| Frequencies -- | 803.2547    | 826.0200    | 844.1163    |
| Frequencies -- | 872.6955    | 887.0939    | 902.1031    |
| Frequencies -- | 906.8480    | 913.3456    | 921.3080    |
| Frequencies -- | 926.7742    | 938.9847    | 966.9974    |
| Frequencies -- | 968.0940    | 970.5300    | 991.6027    |
| Frequencies -- | 1010.2466   | 1011.9619   | 1019.0123   |
| Frequencies -- | 1029.1121   | 1039.5187   | 1039.8093   |
| Frequencies -- | 1042.8644   | 1044.1625   | 1046.7394   |
| Frequencies -- | 1048.8817   | 1051.0110   | 1053.9121   |
| Frequencies -- | 1057.2356   | 1086.8087   | 1088.1603   |
| Frequencies -- | 1098.5404   | 1120.4783   | 1123.5568   |
| Frequencies -- | 1126.0591   | 1170.2531   | 1172.4589   |

|                |           |           |           |
|----------------|-----------|-----------|-----------|
| Frequencies -- | 1174.4436 | 1184.0448 | 1209.2520 |
| Frequencies -- | 1212.4605 | 1215.7909 | 1228.9250 |
| Frequencies -- | 1261.4701 | 1268.9484 | 1300.2927 |
| Frequencies -- | 1312.8246 | 1316.1362 | 1319.3426 |
| Frequencies -- | 1325.7778 | 1337.1782 | 1343.3287 |
| Frequencies -- | 1347.9617 | 1351.2115 | 1362.7609 |
| Frequencies -- | 1409.5535 | 1411.1510 | 1412.6485 |
| Frequencies -- | 1419.1725 | 1422.0048 | 1422.3747 |
| Frequencies -- | 1424.5805 | 1427.5447 | 1429.4249 |
| Frequencies -- | 1433.4873 | 1437.2982 | 1449.2559 |
| Frequencies -- | 1452.3986 | 1454.8079 | 1462.7227 |
| Frequencies -- | 1466.8892 | 1467.1821 | 1469.1891 |
| Frequencies -- | 1471.4323 | 1481.6346 | 1484.5921 |
| Frequencies -- | 1486.6922 | 1487.4326 | 1490.3320 |
| Frequencies -- | 1494.1659 | 1498.0840 | 1499.7177 |
| Frequencies -- | 1500.9518 | 1504.8087 | 1506.6158 |
| Frequencies -- | 1508.7708 | 1515.5848 | 1521.7195 |
| Frequencies -- | 1582.2174 | 1594.1405 | 1596.1105 |
| Frequencies -- | 1598.6730 | 1616.9701 | 1619.6212 |
| Frequencies -- | 1622.5813 | 1625.2210 | 1815.5450 |
| Frequencies -- | 2933.5287 | 2995.9120 | 3008.2169 |
| Frequencies -- | 3009.1096 | 3012.6402 | 3017.2207 |
| Frequencies -- | 3024.3578 | 3033.5343 | 3086.6148 |
| Frequencies -- | 3095.5363 | 3096.2243 | 3097.2985 |
| Frequencies -- | 3099.5891 | 3105.3599 | 3109.1478 |
| Frequencies -- | 3130.4617 | 3136.5423 | 3141.9369 |
| Frequencies -- | 3144.9645 | 3146.4121 | 3161.4520 |
| Frequencies -- | 3162.1024 | 3187.5425 | 3188.6607 |
| Frequencies -- | 3192.2635 | 3211.9934 | 3215.4334 |

**Catalyst 19:**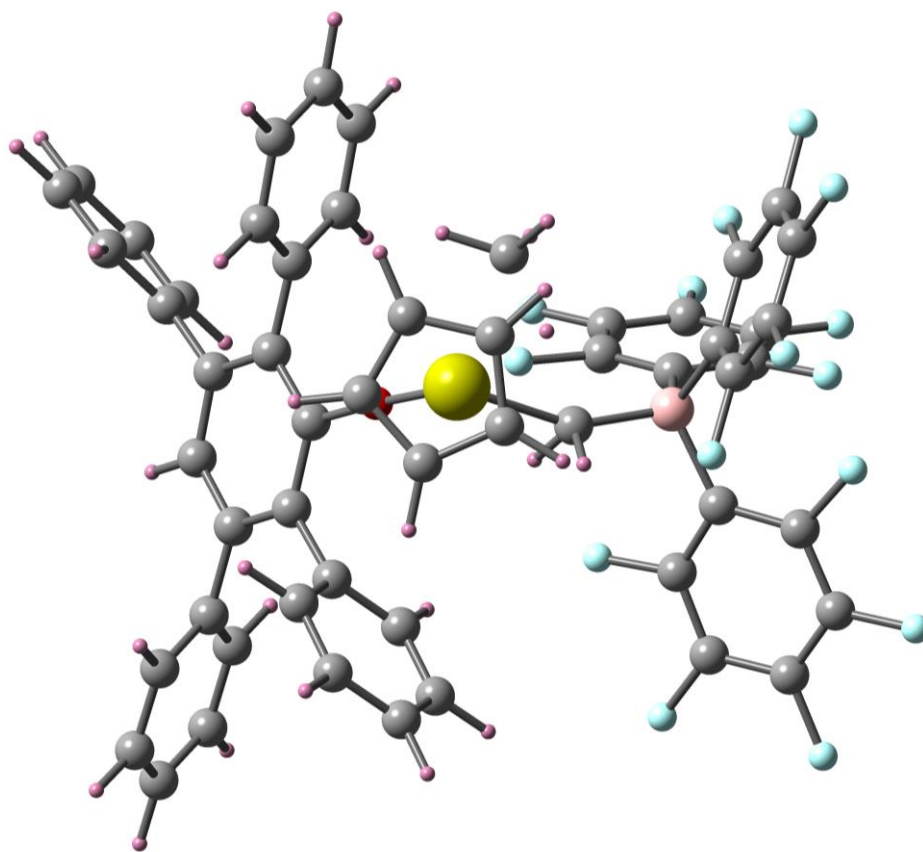

| vacuum        | toluene-like solvent | D3 dispersion |
|---------------|----------------------|---------------|
| -3769.6648687 | -3769.6821422        | -0.78806683   |

Imaginary frequency corresponding to vibration along the reaction coordinate:  $-1063 \text{ cm}^{-1}$ .

|    |             |             |             |
|----|-------------|-------------|-------------|
| Ti | -0.07072500 | -0.54677400 | -2.12594800 |
| C  | 0.59701700  | -2.57372500 | -1.23455100 |
| H  | 0.59021600  | -2.82014000 | -0.16549800 |
| H  | -0.34568400 | -2.95902500 | -1.64463100 |
| H  | 1.43405500  | -3.07761600 | -1.72619600 |
| O  | -1.67744600 | -0.32779600 | -1.40697800 |
| C  | -2.95194000 | -0.07408500 | -0.90364100 |
| C  | -3.38453600 | 1.28441000  | -0.81096900 |
| C  | -3.72276800 | -1.17725400 | -0.42489400 |
| C  | -4.60657500 | 1.54608400  | -0.12567000 |
| C  | -4.94594900 | -0.88769100 | 0.24896100  |
| C  | -5.34052000 | 0.46114900  | 0.40611300  |
| H  | -6.28004800 | 0.67145600  | 0.91574400  |
| C  | 0.02407500  | 0.56833600  | -4.20102600 |
| C  | 1.36359800  | 0.05270700  | -4.05738700 |
| C  | -0.87043500 | -0.54808100 | -4.35885900 |
| C  | 1.28736100  | -1.37076900 | -4.07730700 |
| C  | -0.09344000 | -1.74744700 | -4.25045400 |
| F  | 1.12433800  | -1.70447900 | 5.89469400  |
| C  | 1.45255300  | -1.32455200 | 4.60108400  |



|   |             |             |             |
|---|-------------|-------------|-------------|
| C | 2.77966000  | -1.01097100 | 4.25891200  |
| C | 0.46793100  | -1.24626100 | 3.60558100  |
| C | 3.08032500  | -0.63135400 | 2.93879700  |
| F | 3.77648400  | -1.08667700 | 5.22415300  |
| C | 0.82661200  | -0.85731700 | 2.29894300  |
| F | -0.85692600 | -1.55524100 | 3.91153700  |
| C | 2.13587000  | -0.53429400 | 1.88634500  |
| F | 4.42716500  | -0.35937700 | 2.67772100  |
| F | -0.25073400 | -0.81533800 | 1.39302700  |
| B | 2.61305500  | 0.00975600  | 0.37996600  |
| C | 3.20132500  | 1.55958700  | 0.68569900  |
| C | 3.72354300  | -0.98233800 | -0.37352500 |
| C | 1.35501000  | 0.17068200  | -0.73908300 |
| C | 4.55314800  | 1.98174600  | 0.64751300  |
| C | 2.31734600  | 2.59248700  | 1.07787400  |
| C | 4.05561600  | -2.30172600 | 0.00945600  |
| C | 4.37168700  | -0.58108400 | -1.56605700 |
| H | 0.50934400  | 0.69700000  | -0.26428600 |
| H | 1.78238000  | 0.76382400  | -1.57019300 |
| H | 1.06747500  | -1.33314300 | -0.97072000 |
| C | 4.98183300  | 3.29994000  | 0.91089500  |
| F | 5.58145900  | 1.08300000  | 0.35581400  |
| C | 2.69068000  | 3.92181900  | 1.34571500  |
| F | 0.94764900  | 2.31576200  | 1.25354600  |
| C | 4.97530500  | -3.12499100 | -0.67529900 |
| F | 3.44226100  | -2.90672400 | 1.11544800  |
| C | 5.29012600  | -1.35804800 | -2.29156100 |
| F | 4.10491300  | 0.69163900  | -2.10755800 |
| C | 4.04303400  | 4.28641400  | 1.25324700  |
| F | 6.32925700  | 3.63299300  | 0.83741500  |
| F | 1.73352900  | 4.87268800  | 1.69717800  |
| C | 5.60772800  | -2.64863300 | -1.83422700 |
| F | 5.24650000  | -4.41160700 | -0.22311400 |
| F | 5.87950500  | -0.86878300 | -3.45364500 |
| F | 4.44310500  | 5.59101200  | 1.50547200  |
| F | 6.50895500  | -3.44300000 | -2.52838200 |
| C | -5.15839100 | 2.93357100  | 0.07847200  |
| C | -5.64689500 | 3.71258300  | -1.00101000 |
| C | -5.25700500 | 3.46424000  | 1.39083200  |
| C | -6.21077900 | 4.98609100  | -0.77668100 |
| H | -5.59883600 | 3.31992500  | -2.01762100 |
| C | -5.81312600 | 4.74113200  | 1.61723400  |
| H | -4.88493000 | 2.88150300  | 2.23635800  |
| C | -6.29288800 | 5.50788600  | 0.53298700  |
| H | -6.58613900 | 5.56724300  | -1.62238200 |
| H | -5.86920700 | 5.13449600  | 2.63495900  |
| H | -6.72542200 | 6.49601600  | 0.70608700  |
| C | -5.85307600 | -1.95111400 | 0.81002400  |
| C | -6.50303900 | -2.89609500 | -0.02458100 |
| C | -6.12819700 | -1.98139800 | 2.20209200  |
| C | -7.39470600 | -3.84590400 | 0.51604600  |
| H | -6.32295300 | -2.88294900 | -1.10034400 |
| C | -7.01362000 | -2.93559900 | 2.74649200  |
| H | -5.63526600 | -1.26564700 | 2.86357400  |
| C | -7.65167300 | -3.87248300 | 1.90455000  |
| H | -7.88929700 | -4.56064400 | -0.14608600 |
| H | -7.20188900 | -2.94716200 | 3.82263300  |

|   |             |             |             |
|---|-------------|-------------|-------------|
| H | -8.33988700 | -4.61028600 | 2.32346900  |
| C | -2.56960300 | 2.41125800  | -1.39141300 |
| C | -2.65629400 | 2.72619800  | -2.77194200 |
| C | -1.75465300 | 3.22324200  | -0.56403000 |
| C | -1.96087900 | 3.83105200  | -3.30852300 |
| H | -3.29277800 | 2.12109800  | -3.42289800 |
| C | -1.04936600 | 4.32272600  | -1.09840000 |
| H | -1.67437600 | 3.00144000  | 0.50047300  |
| C | -1.15384300 | 4.63390400  | -2.47175700 |
| H | -2.05983100 | 4.07206600  | -4.36989400 |
| H | -0.42980000 | 4.93425600  | -0.43957900 |
| H | -0.62017600 | 5.49399900  | -2.88255900 |
| C | -3.24714300 | -2.59571900 | -0.59044400 |
| C | -3.30873900 | -3.23820200 | -1.85382300 |
| C | -2.78186000 | -3.33903700 | 0.52373100  |
| C | -2.93192400 | -4.59123900 | -1.99817100 |
| H | -3.68479000 | -2.68888300 | -2.72055400 |
| C | -2.40139600 | -4.68993300 | 0.38203400  |
| H | -2.72114800 | -2.86063500 | 1.50225100  |
| C | -2.47770100 | -5.32292000 | -0.87828800 |
| H | -3.00867800 | -5.07557400 | -2.97496500 |
| H | -2.05170500 | -5.24667600 | 1.25434100  |
| H | -2.19288200 | -6.37199200 | -0.98533200 |
| H | 2.12213900  | -2.05612300 | -3.97141200 |
| H | 2.26579200  | 0.64341300  | -3.94248000 |
| H | -0.25452800 | 1.61639700  | -4.22782200 |
| H | -1.94647500 | -0.48832700 | -4.49315200 |
| H | -0.47211900 | -2.76340400 | -4.31051300 |

|                |            |          |          |
|----------------|------------|----------|----------|
| Frequencies -- | -1063.1682 | 8.0514   | 10.0695  |
| Frequencies -- | 13.9021    | 21.1879  | 22.7065  |
| Frequencies -- | 25.8324    | 27.7555  | 28.7925  |
| Frequencies -- | 30.5298    | 33.3189  | 35.1024  |
| Frequencies -- | 38.1087    | 40.8690  | 42.3238  |
| Frequencies -- | 44.9157    | 47.2624  | 54.2065  |
| Frequencies -- | 54.6545    | 56.7434  | 61.0915  |
| Frequencies -- | 61.8546    | 69.8341  | 78.3148  |
| Frequencies -- | 86.5382    | 103.5449 | 108.8954 |
| Frequencies -- | 111.2858   | 114.9571 | 120.8773 |
| Frequencies -- | 124.3326   | 124.9955 | 130.6091 |
| Frequencies -- | 137.3408   | 140.2367 | 142.6078 |
| Frequencies -- | 144.3186   | 147.6329 | 153.9048 |
| Frequencies -- | 156.1939   | 159.7664 | 162.5996 |
| Frequencies -- | 171.7716   | 177.5156 | 193.5068 |
| Frequencies -- | 208.2577   | 209.5970 | 210.7384 |
| Frequencies -- | 216.8401   | 219.7682 | 224.3642 |
| Frequencies -- | 226.4859   | 228.5160 | 237.6846 |
| Frequencies -- | 246.3727   | 250.6284 | 256.2129 |
| Frequencies -- | 264.3163   | 264.5005 | 265.0219 |
| Frequencies -- | 269.0198   | 274.6704 | 275.9198 |
| Frequencies -- | 279.2699   | 288.1872 | 301.6484 |
| Frequencies -- | 303.5024   | 314.9717 | 317.5461 |
| Frequencies -- | 323.8738   | 325.7887 | 329.4652 |
| Frequencies -- | 333.2173   | 345.1280 | 361.2670 |
| Frequencies -- | 366.6406   | 376.4279 | 377.7791 |
| Frequencies -- | 379.1355   | 381.7082 | 396.7590 |
| Frequencies -- | 402.8626   | 404.4440 | 406.2026 |
| Frequencies -- | 407.8704   | 409.6611 | 416.6589 |
| Frequencies -- | 431.1373   | 431.4469 | 432.5318 |
| Frequencies -- | 433.5084   | 452.5848 | 456.3076 |

|                |           |           |           |
|----------------|-----------|-----------|-----------|
| Frequencies -- | 463.6026  | 490.0644  | 498.5182  |
| Frequencies -- | 518.4085  | 525.4483  | 531.1836  |
| Frequencies -- | 538.7228  | 542.8564  | 543.9832  |
| Frequencies -- | 550.0754  | 552.1431  | 568.4283  |
| Frequencies -- | 570.5711  | 576.1950  | 600.9388  |
| Frequencies -- | 606.0510  | 611.0193  | 616.3480  |
| Frequencies -- | 617.6159  | 619.8262  | 624.3975  |
| Frequencies -- | 632.1087  | 635.6942  | 635.8809  |
| Frequencies -- | 637.4707  | 640.6961  | 643.3877  |
| Frequencies -- | 654.2653  | 654.9846  | 674.9388  |
| Frequencies -- | 689.8267  | 700.5697  | 709.3159  |
| Frequencies -- | 709.7963  | 710.1870  | 713.8809  |
| Frequencies -- | 716.2285  | 716.6661  | 723.3745  |
| Frequencies -- | 735.8265  | 743.1931  | 745.1342  |
| Frequencies -- | 747.0993  | 749.5536  | 760.4686  |
| Frequencies -- | 766.6973  | 770.5180  | 775.1931  |
| Frequencies -- | 783.0887  | 789.4976  | 796.3408  |
| Frequencies -- | 799.8706  | 808.3070  | 817.9616  |
| Frequencies -- | 840.9843  | 841.8401  | 846.2410  |
| Frequencies -- | 858.3864  | 859.7244  | 860.3082  |
| Frequencies -- | 866.9103  | 868.3096  | 872.5151  |
| Frequencies -- | 873.5738  | 878.6945  | 890.9650  |
| Frequencies -- | 901.5734  | 911.7127  | 912.0862  |
| Frequencies -- | 913.6145  | 920.4233  | 933.6341  |
| Frequencies -- | 934.6999  | 940.7158  | 944.8496  |
| Frequencies -- | 971.0421  | 984.8312  | 985.2778  |
| Frequencies -- | 991.3493  | 995.3328  | 997.2430  |
| Frequencies -- | 1002.7278 | 1004.8989 | 1005.1323 |
| Frequencies -- | 1010.0897 | 1011.7761 | 1015.8571 |
| Frequencies -- | 1017.6508 | 1020.6078 | 1025.2693 |
| Frequencies -- | 1027.0214 | 1031.0146 | 1037.4959 |
| Frequencies -- | 1039.1435 | 1042.8137 | 1047.6185 |
| Frequencies -- | 1049.8066 | 1050.2312 | 1050.9337 |
| Frequencies -- | 1054.5375 | 1054.8448 | 1055.4591 |
| Frequencies -- | 1088.6254 | 1089.4363 | 1089.8297 |
| Frequencies -- | 1090.6458 | 1090.8368 | 1091.1596 |
| Frequencies -- | 1095.3657 | 1128.5831 | 1129.2440 |
| Frequencies -- | 1135.7319 | 1183.4413 | 1183.4777 |
| Frequencies -- | 1184.2105 | 1184.7533 | 1204.2372 |
| Frequencies -- | 1205.2226 | 1206.5103 | 1207.7388 |
| Frequencies -- | 1209.5475 | 1212.9409 | 1214.6957 |
| Frequencies -- | 1234.8949 | 1261.2429 | 1264.4490 |
| Frequencies -- | 1279.3191 | 1286.5178 | 1291.5200 |
| Frequencies -- | 1308.1113 | 1318.7554 | 1319.8835 |
| Frequencies -- | 1322.5130 | 1324.1155 | 1327.4709 |
| Frequencies -- | 1329.9988 | 1332.8503 | 1334.8283 |
| Frequencies -- | 1338.8193 | 1344.4114 | 1348.2283 |
| Frequencies -- | 1355.5406 | 1366.8755 | 1367.6491 |
| Frequencies -- | 1369.2484 | 1370.9609 | 1380.0400 |
| Frequencies -- | 1393.2555 | 1393.8451 | 1411.1713 |
| Frequencies -- | 1420.0436 | 1421.8016 | 1439.9082 |
| Frequencies -- | 1442.5574 | 1443.6591 | 1444.4338 |
| Frequencies -- | 1445.5304 | 1456.1906 | 1458.2358 |
| Frequencies -- | 1461.2940 | 1467.4105 | 1468.3673 |
| Frequencies -- | 1470.6893 | 1496.7226 | 1496.7793 |
| Frequencies -- | 1502.3044 | 1509.9572 | 1510.9818 |
| Frequencies -- | 1530.7538 | 1589.9768 | 1593.7214 |
| Frequencies -- | 1593.9230 | 1594.6795 | 1596.2303 |
| Frequencies -- | 1597.1706 | 1597.4209 | 1599.4435 |
| Frequencies -- | 1618.1303 | 1619.7575 | 1622.1014 |
| Frequencies -- | 1622.8037 | 1623.4704 | 1624.2651 |
| Frequencies -- | 1624.9143 | 1826.9052 | 2981.8557 |
| Frequencies -- | 3052.0288 | 3088.2104 | 3146.5600 |

|                |           |           |           |
|----------------|-----------|-----------|-----------|
| Frequencies -- | 3148.0718 | 3153.8616 | 3153.9651 |
| Frequencies -- | 3156.5257 | 3160.2351 | 3160.4845 |
| Frequencies -- | 3160.9883 | 3162.3582 | 3170.7753 |
| Frequencies -- | 3173.5215 | 3173.7148 | 3175.9274 |
| Frequencies -- | 3183.9341 | 3184.3249 | 3184.6345 |
| Frequencies -- | 3186.6690 | 3192.2054 | 3195.3412 |
| Frequencies -- | 3195.4838 | 3195.9480 | 3196.8229 |
| Frequencies -- | 3202.9455 | 3241.3760 | 3251.1697 |
| Frequencies -- | 3263.4716 | 3266.8136 | 3284.8608 |

**Catalyst 20:****distal conformation**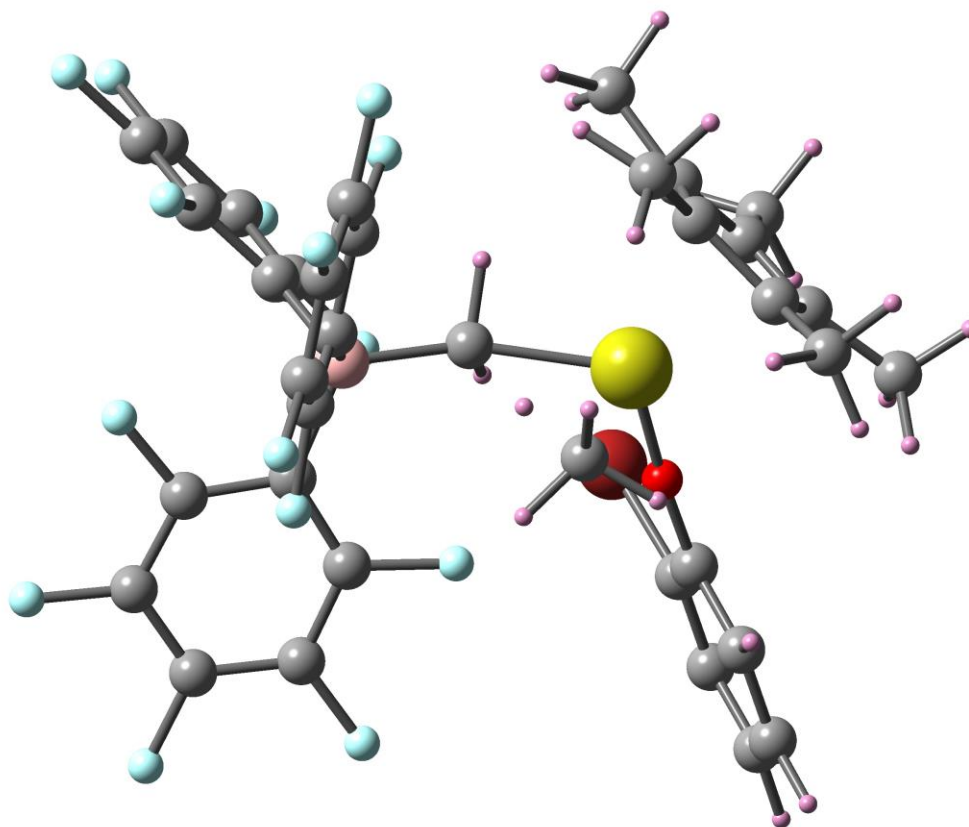

| <b>vacuum</b> | <b>toluene-like solvent</b> | <b>D3 dispersion</b> |
|---------------|-----------------------------|----------------------|
| -3054.9137792 | -3054.9264532               | -0.56541433          |

Imaginary frequency corresponding to vibration along the reaction coordinate:  $-1033 \text{ cm}^{-1}$ .

|    |             |             |             |
|----|-------------|-------------|-------------|
| Ti | -1.86372000 | 1.50493600  | 0.01990300  |
| C  | -0.93923300 | 1.81276700  | -2.10483700 |
| H  | -0.48395800 | 1.06047100  | -2.76461200 |
| H  | -1.97516700 | 1.93674300  | -2.44921000 |
| H  | -0.40352700 | 2.76065600  | -2.20750000 |
| O  | -3.09909600 | 0.30266600  | -0.45441600 |
| C  | -4.11271900 | -0.52938500 | -0.86875900 |
| C  | -4.57562400 | -1.60739700 | -0.06707900 |
| C  | -4.69483900 | -0.32566400 | -2.14679500 |
| C  | -5.59871100 | -2.45671600 | -0.53491100 |
| C  | -5.71504700 | -1.17347100 | -2.61365100 |
| C  | -6.17024600 | -2.23962600 | -1.80671600 |
| H  | -5.93921700 | -3.28509100 | 0.08634000  |
| H  | -6.14456300 | -1.00751600 | -3.60322300 |
| H  | -6.95723100 | -2.90648000 | -2.16218000 |
| C  | -1.51501500 | 3.17924400  | 1.80295300  |
| C  | -1.32449500 | 3.89617700  | 0.57552300  |
| C  | -2.87703200 | 2.65858800  | 1.81270000  |
| C  | -2.56851500 | 3.83251800  | -0.18045700 |

|   |             |             |             |
|---|-------------|-------------|-------------|
| C | -3.53922000 | 3.11181200  | 0.60863300  |
| F | 1.18276600  | -5.35964200 | -3.16158800 |
| C | 1.22582800  | -4.15599900 | -2.47214900 |
| C | 2.43579700  | -3.67429200 | -1.94408700 |
| C | 0.06450300  | -3.38944000 | -2.29504200 |
| C | 2.44773800  | -2.45287200 | -1.24694500 |
| F | 3.60562600  | -4.40334300 | -2.12382300 |
| C | 0.13773200  | -2.17159600 | -1.58980500 |
| F | -1.14651800 | -3.83171200 | -2.82135400 |
| C | 1.31039400  | -1.63894600 | -1.01799800 |
| F | 3.70229700  | -2.02950100 | -0.79458600 |
| F | -1.07679100 | -1.46964800 | -1.50589200 |
| B | 1.43620400  | -0.24586300 | -0.10525600 |
| C | 2.11497400  | -0.76844400 | 1.34982300  |
| C | 2.33264600  | 0.94135700  | -0.86592300 |
| C | -0.03230200 | 0.49628300  | 0.30152600  |
| C | 3.44066000  | -0.54628900 | 1.79759200  |
| C | 1.36266200  | -1.56620900 | 2.24574800  |
| C | 2.69842200  | 0.95306700  | -2.23195700 |
| C | 2.74277300  | 2.11082600  | -0.18417500 |
| H | -0.73359200 | -0.28695200 | 0.66371300  |
| H | 0.22652800  | 1.20775700  | 1.10439000  |
| H | -0.42414200 | 1.18142000  | -1.04043600 |
| C | 3.95795300  | -1.02101600 | 3.02071400  |
| F | 4.35732600  | 0.16097900  | 1.01603100  |
| C | 1.83010900  | -2.06588200 | 3.47573900  |
| F | 0.04501200  | -1.94300800 | 1.91866300  |
| C | 3.44422600  | 1.97900300  | -2.85147600 |
| F | 2.29914200  | -0.07734600 | -3.09529300 |
| C | 3.48180500  | 3.16332700  | -0.74851900 |
| F | 2.40455400  | 2.27764100  | 1.17270400  |
| C | 3.14577000  | -1.78311900 | 3.87528300  |
| F | 5.27107700  | -0.74769800 | 3.38679100  |
| F | 1.00512400  | -2.83401800 | 4.29301900  |
| C | 3.84997000  | 3.09452800  | -2.10273400 |
| F | 3.76435700  | 1.90378100  | -4.20243000 |
| F | 3.83731300  | 4.27383400  | 0.01284400  |
| F | 3.63529800  | -2.25627100 | 5.08460000  |
| F | 4.57482900  | 4.12060300  | -2.69189300 |
| C | -2.86301000 | 4.60533500  | -1.44647100 |
| H | -3.21206200 | 5.62059600  | -1.18942900 |
| H | -1.97782200 | 4.72376600  | -2.08451800 |
| H | -3.65327900 | 4.13816000  | -2.05053500 |
| C | -0.12353000 | 4.73224900  | 0.20026600  |
| H | 0.11276200  | 4.68574600  | -0.87160800 |
| H | -0.33115200 | 5.79185200  | 0.43102100  |
| H | 0.77487500  | 4.45041600  | 0.75854600  |
| C | -0.55376600 | 3.08877300  | 2.96684900  |
| H | 0.48712300  | 3.25661700  | 2.66982500  |
| H | -0.81111300 | 3.85757700  | 3.71591100  |
| H | -0.60417200 | 2.11703700  | 3.47909600  |
| C | -3.53557500 | 1.97730500  | 2.99182500  |
| H | -2.85348500 | 1.29821900  | 3.52169100  |
| H | -3.86422700 | 2.73784100  | 3.72183500  |
| H | -4.41948000 | 1.39758900  | 2.70045000  |
| C | -5.00709800 | 2.95176800  | 0.28770600  |
| H | -5.43309300 | 2.03766000  | 0.72027300  |

|    |             |             |             |
|----|-------------|-------------|-------------|
| H  | -5.57172300 | 3.80435800  | 0.70400100  |
| H  | -5.20206600 | 2.93157800  | -0.79281200 |
| H  | -4.32295200 | 0.48972600  | -2.76746400 |
| Br | -3.78543700 | -1.95638800 | 1.68816200  |

|                |            |           |           |
|----------------|------------|-----------|-----------|
| Frequencies -- | -1033.1206 | 9.2612    | 18.4243   |
| Frequencies -- | 20.2208    | 21.6352   | 26.0609   |
| Frequencies -- | 28.0869    | 28.9165   | 32.2871   |
| Frequencies -- | 39.4950    | 41.5922   | 44.6896   |
| Frequencies -- | 50.0141    | 50.5762   | 67.5759   |
| Frequencies -- | 91.1134    | 97.9349   | 102.1661  |
| Frequencies -- | 106.5237   | 111.3136  | 112.2603  |
| Frequencies -- | 114.5056   | 117.8184  | 119.4476  |
| Frequencies -- | 124.6460   | 126.5736  | 134.3047  |
| Frequencies -- | 138.9658   | 142.0737  | 145.0583  |
| Frequencies -- | 151.4129   | 155.5114  | 155.9669  |
| Frequencies -- | 159.6427   | 161.0421  | 164.6781  |
| Frequencies -- | 169.9948   | 176.1649  | 178.6824  |
| Frequencies -- | 181.5924   | 184.4358  | 203.3937  |
| Frequencies -- | 210.3044   | 215.8028  | 220.9263  |
| Frequencies -- | 223.6242   | 227.7662  | 242.3154  |
| Frequencies -- | 254.6949   | 264.2970  | 264.6726  |
| Frequencies -- | 264.8113   | 273.8857  | 274.5931  |
| Frequencies -- | 276.1055   | 278.8762  | 285.8019  |
| Frequencies -- | 288.7231   | 296.4917  | 301.2533  |
| Frequencies -- | 302.0170   | 303.0252  | 305.7611  |
| Frequencies -- | 315.4500   | 324.9704  | 325.6975  |
| Frequencies -- | 331.4960   | 339.3341  | 355.2102  |
| Frequencies -- | 364.1433   | 374.1514  | 377.2674  |
| Frequencies -- | 378.0126   | 380.7619  | 384.7497  |
| Frequencies -- | 393.6755   | 400.7582  | 407.6737  |
| Frequencies -- | 431.6551   | 432.4972  | 433.8783  |
| Frequencies -- | 442.8745   | 450.7537  | 456.8688  |
| Frequencies -- | 464.0074   | 483.7974  | 491.0143  |
| Frequencies -- | 531.4972   | 533.0806  | 534.5732  |
| Frequencies -- | 537.8576   | 538.5471  | 545.0773  |
| Frequencies -- | 553.5741   | 554.0519  | 573.2146  |
| Frequencies -- | 582.9870   | 594.9241  | 599.4249  |
| Frequencies -- | 605.5538   | 612.1395  | 633.6797  |
| Frequencies -- | 635.1304   | 635.9766  | 637.9958  |
| Frequencies -- | 642.5231   | 654.9118  | 671.4061  |
| Frequencies -- | 682.5587   | 701.7677  | 704.6523  |
| Frequencies -- | 717.9244   | 722.7994  | 733.6639  |
| Frequencies -- | 745.4160   | 747.7868  | 761.1643  |
| Frequencies -- | 761.5734   | 770.1334  | 800.5712  |
| Frequencies -- | 801.1972   | 841.9629  | 857.9518  |
| Frequencies -- | 870.8914   | 877.8273  | 882.6091  |
| Frequencies -- | 903.7045   | 912.6134  | 919.6548  |
| Frequencies -- | 932.6850   | 950.6541  | 966.3216  |
| Frequencies -- | 969.5638   | 989.5344  | 1007.4278 |
| Frequencies -- | 1018.8980  | 1028.7766 | 1029.5208 |
| Frequencies -- | 1038.6674  | 1041.3718 | 1043.5747 |
| Frequencies -- | 1044.4774  | 1046.2317 | 1048.5782 |
| Frequencies -- | 1050.0956  | 1052.7697 | 1053.5973 |
| Frequencies -- | 1057.0484  | 1085.5706 | 1088.5617 |
| Frequencies -- | 1093.8048  | 1124.2331 | 1133.1134 |
| Frequencies -- | 1171.4926  | 1173.9069 | 1183.1706 |
| Frequencies -- | 1209.9870  | 1212.7961 | 1215.8582 |
| Frequencies -- | 1255.2525  | 1260.6256 | 1275.2630 |
| Frequencies -- | 1299.4949  | 1319.0242 | 1320.7897 |
| Frequencies -- | 1326.5720  | 1337.5194 | 1343.8654 |
| Frequencies -- | 1350.1954  | 1353.3009 | 1359.1423 |

|                |           |           |           |
|----------------|-----------|-----------|-----------|
| Frequencies -- | 1407.0533 | 1411.6823 | 1413.5249 |
| Frequencies -- | 1419.4065 | 1422.2816 | 1422.8658 |
| Frequencies -- | 1426.6833 | 1427.9364 | 1428.5446 |
| Frequencies -- | 1435.6025 | 1436.0439 | 1448.7679 |
| Frequencies -- | 1452.8874 | 1465.2315 | 1466.1182 |
| Frequencies -- | 1467.6091 | 1468.9721 | 1470.4848 |
| Frequencies -- | 1472.0339 | 1482.5783 | 1488.4134 |
| Frequencies -- | 1490.5681 | 1498.2857 | 1499.1299 |
| Frequencies -- | 1502.2669 | 1506.7543 | 1508.9747 |
| Frequencies -- | 1510.7449 | 1514.7200 | 1527.7439 |
| Frequencies -- | 1580.8028 | 1594.4743 | 1595.9999 |
| Frequencies -- | 1596.4301 | 1599.0630 | 1617.4840 |
| Frequencies -- | 1620.2749 | 1622.8519 | 1813.3172 |
| Frequencies -- | 2942.4131 | 3010.0897 | 3010.6996 |
| Frequencies -- | 3011.9333 | 3014.1806 | 3015.4472 |
| Frequencies -- | 3040.5654 | 3081.1752 | 3098.6091 |
| Frequencies -- | 3099.3576 | 3102.9987 | 3103.3342 |
| Frequencies -- | 3104.4044 | 3137.7537 | 3139.8993 |
| Frequencies -- | 3144.7685 | 3152.5175 | 3161.0850 |
| Frequencies -- | 3173.5877 | 3174.5372 | 3188.3826 |
| Frequencies -- | 3194.9649 | 3201.5807 | 3211.2955 |

### proximal conformation

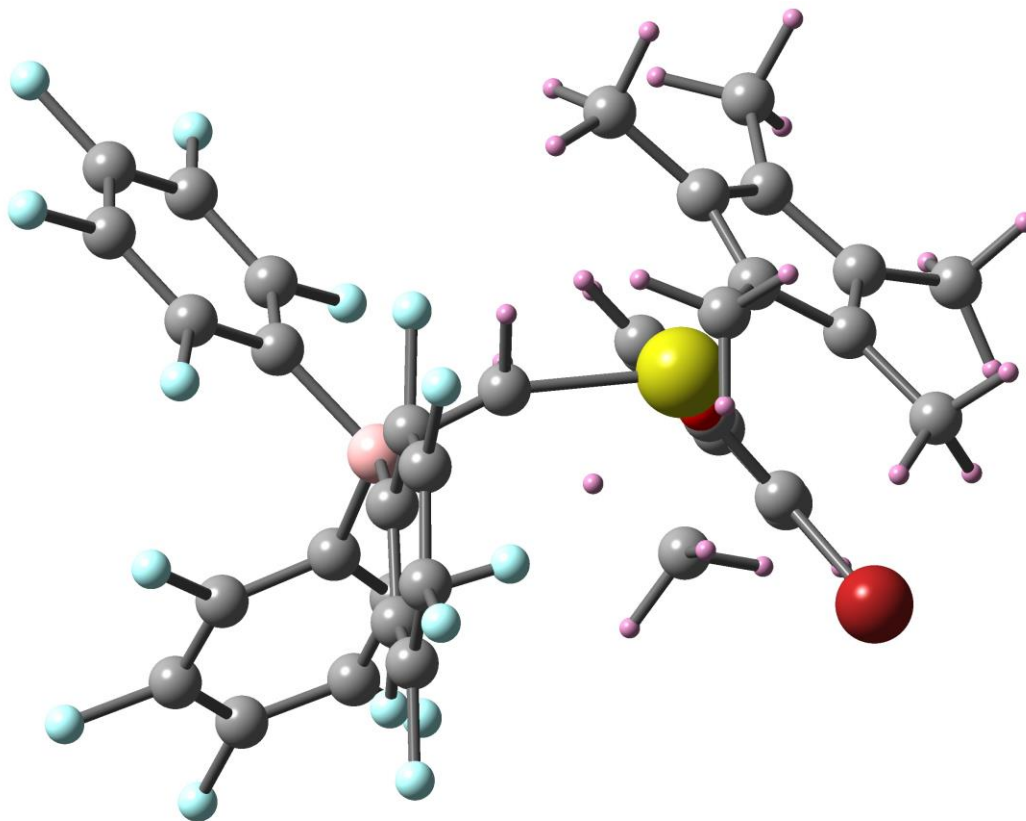

| vacuum        | toluene-like solvent | D3 dispersion |
|---------------|----------------------|---------------|
| -3054.9156274 | -3054.9274942        | -0.56488326   |

Imaginary frequency corresponding to vibration along the reaction coordinate:  $-1082 \text{ cm}^{-1}$ .

Ti                      1.84171500      -1.28654900      0.42351900



|   |             |             |             |
|---|-------------|-------------|-------------|
| C | 1.37882100  | -1.41984700 | -1.83493600 |
| H | 0.95071200  | -0.66213900 | -2.50678400 |
| H | 2.46872200  | -1.36079300 | -1.97164700 |
| H | 1.01794500  | -2.40988300 | -2.12830300 |
| O | 2.95560400  | 0.11257800  | 0.45401600  |
| C | 3.77112800  | 1.18651400  | 0.72344200  |
| C | 3.52487600  | 1.96574000  | 1.88432200  |
| C | 4.83156900  | 1.56305600  | -0.14345700 |
| C | 4.32227200  | 3.08581500  | 2.17742800  |
| C | 5.62967100  | 2.68741000  | 0.14864700  |
| C | 5.37788000  | 3.44722600  | 1.31110200  |
| H | 4.11272300  | 3.67828500  | 3.06969300  |
| H | 6.43399100  | 2.97098500  | -0.53016900 |
| H | 5.99764100  | 4.31900600  | 1.52628700  |
| C | 1.33735300  | -3.12046400 | 1.99118500  |
| C | 1.41920100  | -3.74704100 | 0.70158300  |
| C | 2.62959400  | -2.50995200 | 2.27807300  |
| C | 2.76275700  | -3.53545000 | 0.18452200  |
| C | 3.52125100  | -2.81470100 | 1.18213600  |
| F | -1.22561900 | 5.62970900  | -2.59009600 |
| C | -1.27671300 | 4.36196400  | -2.02820900 |
| C | -2.51093800 | 3.74828200  | -1.75383300 |
| C | -0.09808600 | 3.66249200  | -1.72916900 |
| C | -2.53114900 | 2.46388000  | -1.18159900 |
| F | -3.69396800 | 4.41172700  | -2.05790800 |
| C | -0.18013100 | 2.37625600  | -1.15897200 |
| F | 1.13935900  | 4.23976800  | -2.00046800 |
| C | -1.38042100 | 1.70880300  | -0.84424300 |
| F | -3.80132500 | 1.91213800  | -0.97999800 |
| F | 1.05904100  | 1.75602700  | -0.92900800 |
| B | -1.53760200 | 0.22162700  | -0.10365300 |
| C | -2.45025100 | 0.55402900  | 1.27878000  |
| C | -2.21562400 | -0.92726800 | -1.10769200 |
| C | -0.10913400 | -0.48983600 | 0.46250900  |
| C | -3.80634600 | 0.21129100  | 1.50493900  |
| C | -1.89029700 | 1.29547700  | 2.34745700  |
| C | -2.34820700 | -0.81680800 | -2.51184000 |
| C | -2.64394200 | -2.18436200 | -0.62008700 |
| H | 0.44270500  | 0.27951700  | 1.04645000  |
| H | -0.45242900 | -1.31236700 | 1.10953000  |
| H | 0.58186900  | -0.96222300 | -0.84272500 |
| C | -4.52156200 | 0.52542100  | 2.67956600  |
| F | -4.55047700 | -0.46160200 | 0.53428600  |
| C | -2.55826100 | 1.63631200  | 3.53819900  |
| F | -0.56645900 | 1.78129300  | 2.25926200  |
| C | -2.90249200 | -1.81329400 | -3.34390000 |
| F | -1.89289400 | 0.32103300  | -3.19230800 |
| C | -3.19760200 | -3.21292800 | -1.39997500 |
| F | -2.52515300 | -2.47613600 | 0.75263100  |
| C | -3.89311600 | 1.23861400  | 3.71278000  |
| F | -5.84939600 | 0.14064700  | 2.82298000  |
| F | -1.91072200 | 2.35957400  | 4.53685900  |
| C | -3.34097500 | -3.02346700 | -2.78460200 |
| F | -3.00256100 | -1.61361700 | -4.71594300 |
| F | -3.58869600 | -4.41622900 | -0.81877600 |
| F | -4.57803200 | 1.55288200  | 4.87789600  |
| F | -3.88018700 | -4.02153600 | -3.58323300 |

|    |             |             |             |
|----|-------------|-------------|-------------|
| C  | 3.33311000  | -4.16215200 | -1.06771600 |
| H  | 3.79355100  | -5.13501700 | -0.82241800 |
| H  | 2.56509100  | -4.35459100 | -1.82747300 |
| H  | 4.11458400  | -3.54271100 | -1.52954800 |
| C  | 0.36114300  | -4.60806100 | 0.05176100  |
| H  | 0.27070100  | -4.43110800 | -1.02920900 |
| H  | 0.62443500  | -5.67263000 | 0.17699500  |
| H  | -0.62676000 | -4.46259300 | 0.50076000  |
| C  | 0.18782000  | -3.19765800 | 2.97087300  |
| H  | -0.77207400 | -3.40110900 | 2.48367100  |
| H  | 0.37238600  | -4.01601200 | 3.68815500  |
| H  | 0.07468800  | -2.27681700 | 3.56100300  |
| C  | 3.01730200  | -1.86131300 | 3.58916200  |
| H  | 2.19030900  | -1.29339300 | 4.03898100  |
| H  | 3.30656700  | -2.63638800 | 4.32031400  |
| H  | 3.87263800  | -1.18175600 | 3.48190000  |
| C  | 5.00468000  | -2.53270400 | 1.13836600  |
| H  | 5.27539100  | -1.62124100 | 1.68667100  |
| H  | 5.55117500  | -3.37041000 | 1.60630700  |
| H  | 5.38297300  | -2.42943000 | 0.11379600  |
| H  | 2.69240500  | 1.69103200  | 2.53247600  |
| Br | 5.19303500  | 0.55429600  | -1.78603300 |

|                |            |          |          |
|----------------|------------|----------|----------|
| Frequencies -- | -1082.1134 | 8.8130   | 15.0055  |
| Frequencies -- | 17.0749    | 18.7033  | 24.9224  |
| Frequencies -- | 27.8429    | 29.3486  | 31.7687  |
| Frequencies -- | 37.3653    | 39.3998  | 47.1966  |
| Frequencies -- | 49.9494    | 54.0773  | 62.1371  |
| Frequencies -- | 86.6906    | 91.7748  | 98.4465  |
| Frequencies -- | 100.1685   | 107.2681 | 109.2825 |
| Frequencies -- | 113.0536   | 115.1542 | 115.5602 |
| Frequencies -- | 119.7805   | 122.2274 | 125.8813 |
| Frequencies -- | 127.2928   | 134.0572 | 138.3662 |
| Frequencies -- | 142.4153   | 145.2614 | 151.1426 |
| Frequencies -- | 156.0891   | 159.0200 | 159.4038 |
| Frequencies -- | 161.3701   | 168.3340 | 170.9349 |
| Frequencies -- | 179.0942   | 184.1486 | 193.8379 |
| Frequencies -- | 209.9264   | 213.9348 | 217.6804 |
| Frequencies -- | 223.2530   | 225.7868 | 227.9076 |
| Frequencies -- | 254.1470   | 264.6790 | 264.8922 |
| Frequencies -- | 265.1438   | 274.8096 | 276.1607 |
| Frequencies -- | 276.5557   | 279.2857 | 284.6749 |
| Frequencies -- | 287.5636   | 293.4120 | 302.6724 |
| Frequencies -- | 303.0087   | 304.3872 | 306.2558 |
| Frequencies -- | 316.0122   | 324.5364 | 326.7296 |
| Frequencies -- | 330.5720   | 336.6982 | 355.1418 |
| Frequencies -- | 365.7188   | 373.8816 | 377.1612 |
| Frequencies -- | 377.9880   | 380.3169 | 381.2193 |
| Frequencies -- | 392.4484   | 397.2481 | 408.6784 |
| Frequencies -- | 431.4823   | 432.0493 | 434.2820 |
| Frequencies -- | 444.0943   | 449.7680 | 456.4593 |
| Frequencies -- | 464.0677   | 477.0653 | 490.9405 |
| Frequencies -- | 531.0119   | 533.8415 | 534.6340 |
| Frequencies -- | 537.5354   | 538.0839 | 545.0471 |
| Frequencies -- | 553.3928   | 553.8457 | 570.4835 |
| Frequencies -- | 581.9389   | 594.1921 | 597.3406 |
| Frequencies -- | 604.1863   | 610.5359 | 631.9834 |
| Frequencies -- | 634.7737   | 635.9565 | 638.6027 |
| Frequencies -- | 642.8906   | 654.4062 | 670.9569 |
| Frequencies -- | 682.8432   | 699.1278 | 704.5154 |

|                |           |           |           |
|----------------|-----------|-----------|-----------|
| Frequencies -- | 718.4669  | 723.0641  | 733.8515  |
| Frequencies -- | 745.7270  | 748.4183  | 762.0168  |
| Frequencies -- | 763.8478  | 770.9324  | 799.7394  |
| Frequencies -- | 801.6477  | 841.3997  | 861.3229  |
| Frequencies -- | 871.5480  | 880.3848  | 885.3036  |
| Frequencies -- | 903.6472  | 913.0263  | 919.7512  |
| Frequencies -- | 932.1759  | 953.9426  | 967.3585  |
| Frequencies -- | 968.8271  | 991.8854  | 1007.2547 |
| Frequencies -- | 1019.1595 | 1027.2815 | 1029.3158 |
| Frequencies -- | 1039.2375 | 1040.4635 | 1043.2840 |
| Frequencies -- | 1044.2691 | 1045.6834 | 1048.1716 |
| Frequencies -- | 1050.9632 | 1053.2145 | 1053.5542 |
| Frequencies -- | 1057.8645 | 1086.5064 | 1088.4257 |
| Frequencies -- | 1096.0782 | 1124.5749 | 1134.6516 |
| Frequencies -- | 1170.4579 | 1174.4104 | 1184.9776 |
| Frequencies -- | 1209.5622 | 1213.8248 | 1216.5597 |
| Frequencies -- | 1255.7284 | 1267.9480 | 1278.5188 |
| Frequencies -- | 1300.1141 | 1316.0508 | 1320.7970 |
| Frequencies -- | 1326.2865 | 1337.4624 | 1343.2128 |
| Frequencies -- | 1344.9704 | 1351.9210 | 1359.2058 |
| Frequencies -- | 1408.3363 | 1411.2426 | 1411.7778 |
| Frequencies -- | 1419.7226 | 1422.7738 | 1422.8646 |
| Frequencies -- | 1425.0979 | 1426.8107 | 1428.2913 |
| Frequencies -- | 1434.3017 | 1435.8731 | 1449.5528 |
| Frequencies -- | 1450.9722 | 1463.1174 | 1467.5354 |
| Frequencies -- | 1468.2349 | 1468.3784 | 1470.2717 |
| Frequencies -- | 1472.0475 | 1480.6770 | 1486.8764 |
| Frequencies -- | 1490.2661 | 1497.0163 | 1498.1280 |
| Frequencies -- | 1499.1559 | 1505.5058 | 1506.2906 |
| Frequencies -- | 1509.6201 | 1512.6171 | 1526.1573 |
| Frequencies -- | 1579.6011 | 1594.2849 | 1596.3992 |
| Frequencies -- | 1596.7885 | 1598.9861 | 1617.3461 |
| Frequencies -- | 1620.5728 | 1623.0630 | 1821.4320 |
| Frequencies -- | 2939.9251 | 3007.9806 | 3010.7867 |
| Frequencies -- | 3012.0019 | 3014.5776 | 3015.9897 |
| Frequencies -- | 3033.5173 | 3095.6442 | 3099.6535 |
| Frequencies -- | 3099.7443 | 3100.3861 | 3101.3729 |
| Frequencies -- | 3106.9033 | 3130.6574 | 3137.5053 |
| Frequencies -- | 3142.3425 | 3151.2351 | 3158.9144 |
| Frequencies -- | 3170.0596 | 3175.9463 | 3189.2016 |
| Frequencies -- | 3193.2125 | 3201.9048 | 3211.2593 |

**Catalyst 21:****distal conformation**

Several attempts were made to locate a transition state for H transfer from counterion to methyl initiating group, but these structures always reverted to the contact ion pair. Thus, there does not seem to be a tendency for this conformation to decay by H transfer.

**proximal conformation**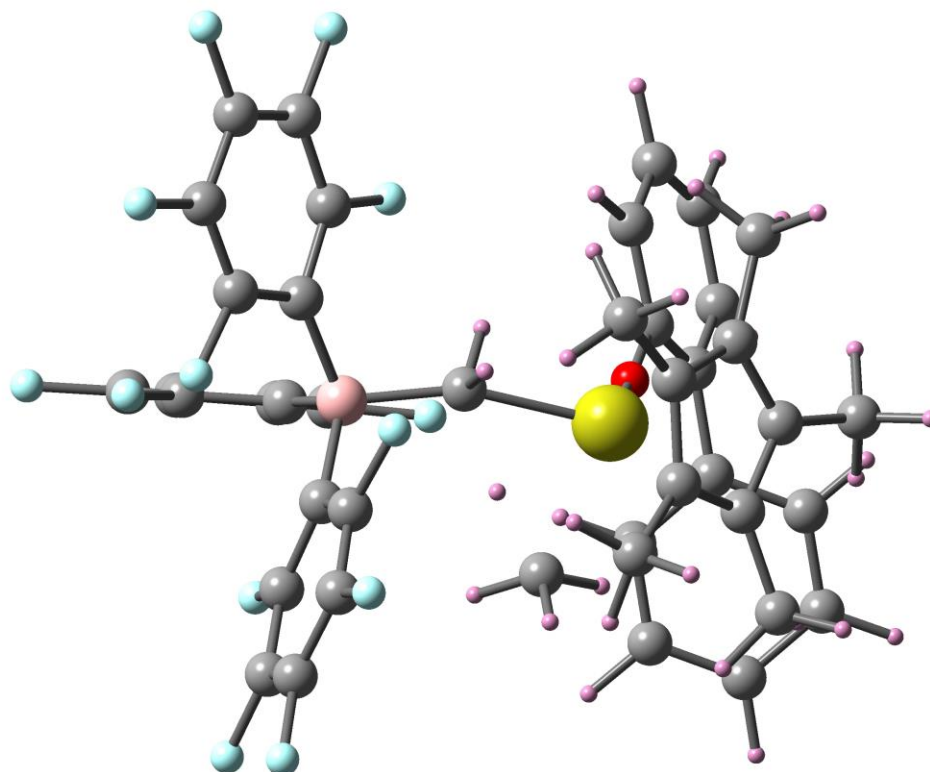

| vacuum       | toluene-like solvent | D3 dispersion |
|--------------|----------------------|---------------|
| -3273.306481 | -3273.3189629        | -0.63465835   |

Imaginary frequency corresponding to vibration along the reaction coordinate:  $-1056 \text{ cm}^{-1}$ .

|    |            |             |             |
|----|------------|-------------|-------------|
| Ti | 1.72157900 | -1.16315300 | 0.68923100  |
| C  | 1.39312100 | -1.45547900 | -1.58425200 |
| H  | 0.96311700 | -0.77679000 | -2.33470900 |
| H  | 2.48390500 | -1.35320900 | -1.67301800 |
| H  | 1.09461100 | -2.48170400 | -1.81516400 |
| O  | 2.79170500 | 0.26430000  | 0.73041100  |
| C  | 3.56176600 | 1.35551900  | 1.11408100  |
| C  | 3.13336200 | 2.10007800  | 2.24205300  |
| C  | 4.75186400 | 1.70433900  | 0.40686900  |
| C  | 3.89774000 | 3.18417600  | 2.70885800  |
| C  | 5.50800800 | 2.79331500  | 0.91639600  |
| C  | 5.09969000 | 3.52455200  | 2.04951100  |
| H  | 3.55463500 | 3.75684800  | 3.57267200  |

|   |             |             |             |
|---|-------------|-------------|-------------|
| H | 6.41521600  | 3.08686400  | 0.38587900  |
| H | 5.70156000  | 4.36461600  | 2.40054500  |
| C | 1.15562500  | -2.97137600 | 2.27475800  |
| C | 1.41090700  | -3.64064500 | 1.03072800  |
| C | 2.37247800  | -2.27031800 | 2.66672800  |
| C | 2.78559300  | -3.36156400 | 0.64437900  |
| C | 3.39128600  | -2.55918400 | 1.68338900  |
| F | -1.32143200 | 5.49615700  | -2.85869700 |
| C | -1.37911300 | 4.25316200  | -2.24473900 |
| C | -2.61383400 | 3.62103900  | -2.01784800 |
| C | -0.20625300 | 3.59513300  | -1.84610200 |
| C | -2.64097200 | 2.36148700  | -1.39237600 |
| F | -3.79012700 | 4.24119300  | -2.42236700 |
| C | -0.29587900 | 2.33434500  | -1.22368200 |
| F | 1.03490300  | 4.18540500  | -2.07351200 |
| C | -1.49696400 | 1.65112900  | -0.95088900 |
| F | -3.90848100 | 1.78598000  | -1.24986800 |
| F | 0.94289000  | 1.75373600  | -0.89715200 |
| B | -1.66077500 | 0.19032800  | -0.15808300 |
| C | -2.70096500 | 0.54076400  | 1.12540500  |
| C | -2.20998000 | -1.02333100 | -1.16576200 |
| C | -0.25701000 | -0.43105300 | 0.55505300  |
| C | -4.05308200 | 0.13969500  | 1.25832800  |
| C | -2.26636200 | 1.35820700  | 2.19676200  |
| C | -2.24277400 | -0.96920700 | -2.57893900 |
| C | -2.61450000 | -2.28231000 | -0.66296900 |
| H | 0.22081300  | 0.38778100  | 1.13597700  |
| H | -0.61922400 | -1.23213000 | 1.21886900  |
| H | 0.53412600  | -0.95769500 | -0.67158400 |
| C | -4.87686200 | 0.46869300  | 2.35499300  |
| F | -4.68242400 | -0.61023800 | 0.26248100  |
| C | -3.04614000 | 1.71841000  | 3.31142200  |
| F | -0.96432500 | 1.90531500  | 2.18871600  |
| C | -2.68315800 | -2.02125300 | -3.41061400 |
| F | -1.79184500 | 0.16517400  | -3.26942900 |
| C | -3.05635300 | -3.36487500 | -1.44119000 |
| F | -2.58836200 | -2.51765000 | 0.72485600  |
| C | -4.37026300 | 1.26004100  | 3.39827700  |
| F | -6.19220500 | 0.02256500  | 2.41048700  |
| F | -2.51908500 | 2.51958700  | 4.32134400  |
| C | -3.10321100 | -3.23207500 | -2.83902100 |
| F | -2.68690000 | -1.87519500 | -4.79332600 |
| F | -3.43208000 | -4.56543000 | -0.84415300 |
| F | -5.16317600 | 1.59096500  | 4.48802200  |
| F | -3.53074600 | -4.28400700 | -3.63635100 |
| C | 3.52187600  | -3.99430700 | -0.51492900 |
| H | 3.96819600  | -4.95212700 | -0.19532700 |
| H | 2.86023100  | -4.21631600 | -1.36193200 |
| H | 4.34199000  | -3.36358100 | -0.88500900 |
| C | 0.48273200  | -4.59943900 | 0.32166900  |
| H | 0.56121900  | -4.53963600 | -0.77266700 |
| H | 0.74332000  | -5.63575100 | 0.59975300  |
| H | -0.56686300 | -4.44661000 | 0.59455200  |
| C | -0.08083100 | -3.09374000 | 3.13660800  |
| H | -0.96319400 | -3.40662000 | 2.56807400  |
| H | 0.09219400  | -3.85204100 | 3.91990200  |
| H | -0.33160600 | -2.15589200 | 3.65307800  |

|   |            |             |             |
|---|------------|-------------|-------------|
| C | 2.57848300 | -1.55430500 | 3.98401900  |
| H | 1.67038300 | -1.03854900 | 4.32739400  |
| H | 2.84772400 | -2.28306700 | 4.76858500  |
| H | 3.38751100 | -0.81420600 | 3.93673000  |
| C | 4.85268200 | -2.18824700 | 1.77521700  |
| H | 5.01678900 | -1.27860000 | 2.36608200  |
| H | 5.40757500 | -3.00517000 | 2.26941700  |
| H | 5.30843700 | -2.03334100 | 0.78934000  |
| H | 2.20187100 | 1.82726900  | 2.73790100  |
| C | 5.21392300 | 1.01766200  | -0.84342700 |
| C | 6.52096000 | 0.46741600  | -0.92295000 |
| C | 4.39580100 | 0.98054500  | -2.00371700 |
| C | 6.99354100 | -0.11426600 | -2.11891600 |
| H | 7.16775400 | 0.48961800  | -0.04307700 |
| C | 4.87068500 | 0.40808200  | -3.20278600 |
| H | 3.40447200 | 1.43211800  | -1.97604500 |
| C | 6.16887300 | -0.14608200 | -3.26531600 |
| H | 8.00198500 | -0.53314900 | -2.15638500 |
| H | 4.23268000 | 0.40893500  | -4.08984000 |
| H | 6.53569500 | -0.58494000 | -4.19589400 |

|                |            |          |          |
|----------------|------------|----------|----------|
| Frequencies -- | -1056.2213 | 11.4349  | 14.1246  |
| Frequencies -- | 22.4327    | 25.5617  | 27.7659  |
| Frequencies -- | 30.3138    | 32.4523  | 34.7645  |
| Frequencies -- | 38.6463    | 41.2278  | 45.0844  |
| Frequencies -- | 47.8716    | 52.3368  | 56.1505  |
| Frequencies -- | 69.4216    | 79.6381  | 88.8811  |
| Frequencies -- | 100.6632   | 105.5847 | 110.3479 |
| Frequencies -- | 112.6863   | 114.9852 | 116.6186 |
| Frequencies -- | 120.6419   | 122.2742 | 124.8935 |
| Frequencies -- | 131.6527   | 134.9163 | 138.3132 |
| Frequencies -- | 142.2017   | 143.4779 | 145.2165 |
| Frequencies -- | 146.1232   | 152.7245 | 155.5595 |
| Frequencies -- | 159.7779   | 161.5696 | 164.5131 |
| Frequencies -- | 165.7945   | 173.6577 | 176.2361 |
| Frequencies -- | 179.7723   | 194.3676 | 204.8825 |
| Frequencies -- | 216.4489   | 220.0704 | 224.2091 |
| Frequencies -- | 225.8211   | 248.8305 | 257.4017 |
| Frequencies -- | 264.4156   | 264.5093 | 264.8193 |
| Frequencies -- | 275.0223   | 276.0627 | 277.0259 |
| Frequencies -- | 282.0979   | 290.5388 | 292.7903 |
| Frequencies -- | 296.7559   | 303.0598 | 303.3697 |
| Frequencies -- | 304.7506   | 305.9541 | 310.7036 |
| Frequencies -- | 319.9744   | 327.1674 | 328.7957 |
| Frequencies -- | 335.9850   | 348.5539 | 359.0477 |
| Frequencies -- | 368.3952   | 375.1379 | 377.6295 |
| Frequencies -- | 378.3303   | 380.8230 | 386.7807 |
| Frequencies -- | 391.5636   | 399.2353 | 407.9152 |
| Frequencies -- | 410.3159   | 431.4355 | 432.1377 |
| Frequencies -- | 434.4563   | 451.4872 | 456.6516 |
| Frequencies -- | 464.0764   | 472.1803 | 489.2210 |
| Frequencies -- | 498.0075   | 530.5925 | 534.4013 |
| Frequencies -- | 536.3057   | 537.8744 | 544.9920 |
| Frequencies -- | 546.4035   | 553.9278 | 557.2842 |
| Frequencies -- | 562.2907   | 573.1530 | 582.6126 |
| Frequencies -- | 594.9980   | 599.4106 | 608.0985 |
| Frequencies -- | 613.0108   | 614.9055 | 620.7837 |
| Frequencies -- | 634.7846   | 636.1500 | 638.2526 |
| Frequencies -- | 642.6717   | 655.2813 | 656.9849 |
| Frequencies -- | 673.4312   | 703.5023 | 713.8255 |

|                |           |           |           |
|----------------|-----------|-----------|-----------|
| Frequencies -- | 718.4393  | 723.2155  | 734.3514  |
| Frequencies -- | 738.0894  | 742.5063  | 746.5300  |
| Frequencies -- | 748.1397  | 761.3796  | 766.5320  |
| Frequencies -- | 770.9220  | 779.8175  | 802.0308  |
| Frequencies -- | 804.9183  | 843.8945  | 867.9034  |
| Frequencies -- | 874.9980  | 875.7846  | 884.8722  |
| Frequencies -- | 887.4500  | 904.2232  | 912.9187  |
| Frequencies -- | 919.9581  | 923.9879  | 940.4027  |
| Frequencies -- | 960.3879  | 969.9516  | 973.3718  |
| Frequencies -- | 992.3347  | 993.6132  | 999.2183  |
| Frequencies -- | 1009.2332 | 1012.3904 | 1019.5518 |
| Frequencies -- | 1029.2527 | 1035.6224 | 1040.1758 |
| Frequencies -- | 1041.7349 | 1044.0412 | 1045.2535 |
| Frequencies -- | 1047.0457 | 1047.2231 | 1050.5753 |
| Frequencies -- | 1052.2480 | 1054.0227 | 1056.7255 |
| Frequencies -- | 1062.3854 | 1087.8103 | 1089.3067 |
| Frequencies -- | 1091.0158 | 1098.7194 | 1126.5436 |
| Frequencies -- | 1127.1611 | 1171.2746 | 1175.3278 |
| Frequencies -- | 1184.4294 | 1186.8773 | 1208.7124 |
| Frequencies -- | 1209.6637 | 1213.2021 | 1215.5128 |
| Frequencies -- | 1224.6446 | 1265.7182 | 1274.4297 |
| Frequencies -- | 1301.4907 | 1301.7706 | 1316.8114 |
| Frequencies -- | 1320.6556 | 1325.7296 | 1336.2718 |
| Frequencies -- | 1337.5869 | 1343.6711 | 1351.2499 |
| Frequencies -- | 1356.9042 | 1357.8028 | 1370.3669 |
| Frequencies -- | 1410.5693 | 1411.4721 | 1413.9031 |
| Frequencies -- | 1419.6115 | 1422.0335 | 1425.1495 |
| Frequencies -- | 1426.8970 | 1428.3930 | 1430.1574 |
| Frequencies -- | 1434.0840 | 1435.4755 | 1450.9404 |
| Frequencies -- | 1451.4106 | 1452.0070 | 1464.4818 |
| Frequencies -- | 1467.2288 | 1469.0543 | 1470.6802 |
| Frequencies -- | 1471.7138 | 1479.9790 | 1483.7811 |
| Frequencies -- | 1489.1329 | 1492.5237 | 1498.9954 |
| Frequencies -- | 1499.9786 | 1501.1270 | 1505.9655 |
| Frequencies -- | 1508.6167 | 1509.7955 | 1512.1626 |
| Frequencies -- | 1517.3073 | 1526.7846 | 1579.3313 |
| Frequencies -- | 1594.1825 | 1595.5656 | 1596.2601 |
| Frequencies -- | 1598.7739 | 1611.6251 | 1617.3117 |
| Frequencies -- | 1620.6396 | 1623.0483 | 1623.6190 |
| Frequencies -- | 1823.7546 | 2946.7341 | 3007.9290 |
| Frequencies -- | 3010.8308 | 3011.8852 | 3013.4765 |
| Frequencies -- | 3014.6583 | 3039.2572 | 3095.4841 |
| Frequencies -- | 3098.5227 | 3099.0307 | 3100.5485 |
| Frequencies -- | 3102.2118 | 3110.4371 | 3136.2269 |
| Frequencies -- | 3140.2439 | 3142.3928 | 3154.5988 |
| Frequencies -- | 3156.4247 | 3160.3257 | 3162.8578 |
| Frequencies -- | 3167.5872 | 3168.6901 | 3175.3679 |
| Frequencies -- | 3180.1169 | 3190.1635 | 3194.7117 |
| Frequencies -- | 3195.6502 | 3206.5874 | 3208.8572 |

**Catalyst 22:**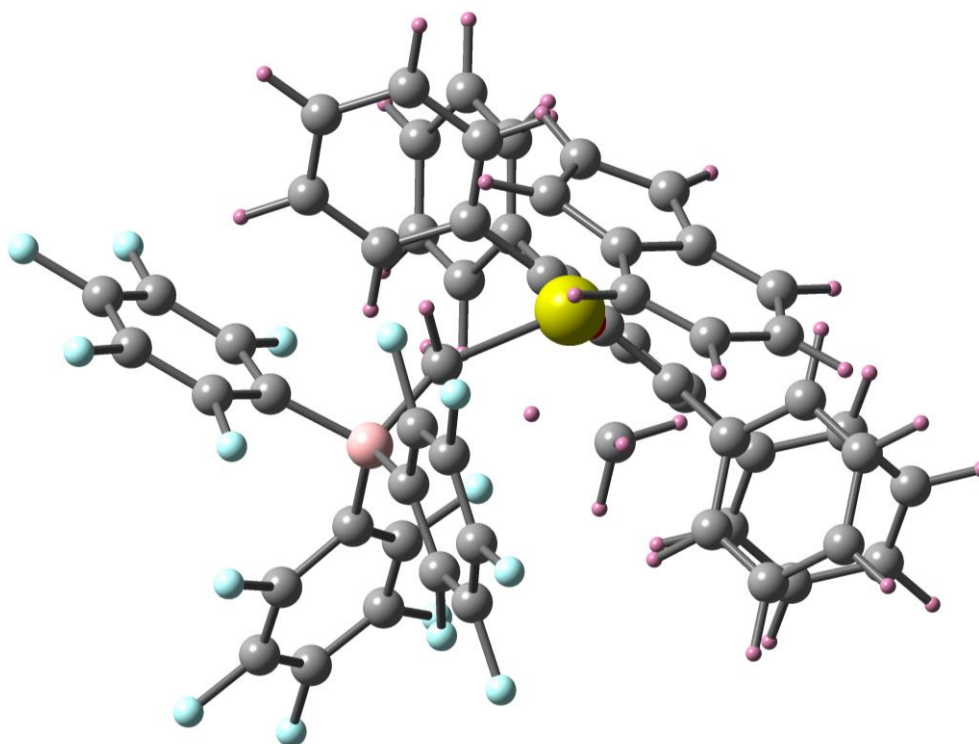

| <b>vacuum</b> | <b>toluene-like solvent</b> | <b>D3 dispersion</b> |
|---------------|-----------------------------|----------------------|
| -3923.2265199 | -3923.2445784               | -0.84828938          |

Imaginary frequency corresponding to vibration along the reaction coordinate:  $-993 \text{ cm}^{-1}$ .

|    |             |             |             |
|----|-------------|-------------|-------------|
| Ti | -0.05283200 | -0.98499900 | -1.77779300 |
| C  | 0.64264500  | -2.62715400 | -0.38140600 |
| H  | 0.55667800  | -2.61981200 | 0.71150900  |
| H  | -0.24931500 | -3.14432200 | -0.76559500 |
| H  | 1.51622800  | -3.20030100 | -0.70219500 |
| O  | -1.66229700 | -0.54574100 | -1.16525400 |
| C  | -2.94714800 | -0.17611300 | -0.76149500 |
| C  | -3.39146400 | 1.16846800  | -0.97324900 |
| C  | -3.73775000 | -1.15718400 | -0.08437700 |
| C  | -4.68922800 | 1.52336600  | -0.49220200 |
| C  | -5.01490500 | -0.76484500 | 0.41079200  |
| C  | -5.45724300 | 0.55876400  | 0.19731600  |
| H  | -6.44938300 | 0.83750900  | 0.54961800  |
| C  | 1.38816300  | -0.87182300 | -3.82512700 |
| C  | 1.45083900  | -2.28056000 | -3.54145300 |
| C  | 0.01870600  | -0.53383700 | -4.07587300 |
| C  | 0.08277500  | -2.80301600 | -3.56850900 |
| C  | -0.80147800 | -1.70020100 | -3.87853300 |
| F  | 0.33321300  | 1.49935500  | 5.97559500  |
| C  | 0.83304800  | 1.21837200  | 4.71152600  |
| C  | 2.19035800  | 1.42792300  | 4.41209500  |
| C  | -0.00300800 | 0.70943200  | 3.70689100  |
| C  | 2.66720400  | 1.13322300  | 3.12183900  |
| F  | 3.04566000  | 1.91155900  | 5.39532900  |



|   |             |             |             |
|---|-------------|-------------|-------------|
| C | 0.52991000  | 0.43507200  | 2.43196100  |
| F | -1.35105900 | 0.47195700  | 3.97626800  |
| C | 1.87398800  | 0.63435900  | 2.05903700  |
| F | 4.03976600  | 1.32403600  | 2.92846700  |
| F | -0.39551900 | -0.09932300 | 1.51699600  |
| B | 2.53606300  | 0.38568100  | 0.54729500  |
| C | 3.29450100  | 1.84225400  | 0.15973700  |
| C | 3.57906300  | -0.91971300 | 0.50532800  |
| C | 1.40622300  | 0.13009700  | -0.69612500 |
| C | 4.68498300  | 2.08868500  | 0.05646200  |
| C | 2.51564700  | 2.99888200  | -0.08251600 |
| C | 3.74789100  | -1.88072000 | 1.52874400  |
| C | 4.36161700  | -1.20135800 | -0.64095300 |
| H | 0.56992000  | 0.84519100  | -0.56387300 |
| H | 1.97087300  | 0.34404600  | -1.61531900 |
| H | 1.08125900  | -1.37257500 | -0.42312400 |
| C | 5.24716600  | 3.32659600  | -0.31912700 |
| F | 5.61889800  | 1.09452500  | 0.35961300  |
| C | 3.02318100  | 4.25458500  | -0.46379600 |
| F | 1.12071700  | 2.94685200  | 0.08493600  |
| C | 4.63683800  | -2.97503900 | 1.46002700  |
| F | 2.99254400  | -1.82089900 | 2.70814600  |
| C | 5.25944700  | -2.27431600 | -0.76402600 |
| F | 4.27292300  | -0.36274300 | -1.76836600 |
| C | 4.41104700  | 4.42025300  | -0.59563400 |
| F | 6.62637000  | 3.47815800  | -0.41199100 |
| F | 2.16877700  | 5.32853100  | -0.70592200 |
| C | 5.40854600  | -3.17354100 | 0.30498600  |
| F | 4.74116900  | -3.86971700 | 2.51934800  |
| F | 5.98763900  | -2.46732100 | -1.93676100 |
| F | 4.94499600  | 5.64427100  | -0.97452400 |
| F | 6.27933000  | -4.24984900 | 0.20739300  |
| C | -5.30882400 | 2.88083500  | -0.69518100 |
| C | -5.55425000 | 3.39957800  | -1.99295800 |
| C | -5.73613600 | 3.64244600  | 0.42388600  |
| C | -6.19859800 | 4.64208700  | -2.16598600 |
| H | -5.25171100 | 2.82699800  | -2.87058200 |
| C | -6.37363600 | 4.88976400  | 0.25410700  |
| H | -5.55603300 | 3.26429100  | 1.43254500  |
| C | -6.60807900 | 5.39544800  | -1.04340800 |
| H | -6.38169100 | 5.01944100  | -3.17484700 |
| H | -6.68340700 | 5.46311200  | 1.13095900  |
| H | -7.10319700 | 6.35984800  | -1.17792500 |
| C | -5.93328900 | -1.69355200 | 1.16359800  |
| C | -6.60176700 | -2.76638700 | 0.52103000  |
| C | -6.20372500 | -1.45608600 | 2.53617300  |
| C | -7.50952300 | -3.58124600 | 1.23029500  |
| H | -6.42300100 | -2.95846900 | -0.53813100 |
| C | -7.10529600 | -2.27412700 | 3.25003800  |
| H | -5.69901800 | -0.63470400 | 3.04948700  |
| C | -7.76296700 | -3.34072500 | 2.59880100  |
| H | -8.01922500 | -4.39850700 | 0.71439800  |
| H | -7.29219500 | -2.07838500 | 4.30850000  |
| H | -8.46409300 | -3.97304700 | 3.14835000  |
| C | -2.51507200 | 2.22029200  | -1.59727000 |
| C | -2.17161200 | 2.20109200  | -2.97115900 |
| C | -2.06970100 | 3.31264300  | -0.81049100 |

|   |             |             |             |
|---|-------------|-------------|-------------|
| C | -1.40564400 | 3.24188100  | -3.54185800 |
| H | -2.53769800 | 1.38942300  | -3.60238900 |
| C | -1.31357700 | 4.35660900  | -1.37730500 |
| H | -2.31581600 | 3.34393900  | 0.25162000  |
| C | -0.97577300 | 4.32520800  | -2.74636500 |
| H | -1.14733500 | 3.21698600  | -4.60294100 |
| H | -0.97325100 | 5.18122200  | -0.74944500 |
| H | -0.38393100 | 5.13138900  | -3.18459400 |
| C | -3.23619800 | -2.55363000 | 0.17264300  |
| C | -3.32815200 | -3.56319300 | -0.81790700 |
| C | -2.73932500 | -2.90594400 | 1.45351000  |
| C | -2.95116800 | -4.89378500 | -0.53318400 |
| H | -3.72819200 | -3.31441300 | -1.80396700 |
| C | -2.35692600 | -4.23325300 | 1.73927500  |
| H | -2.66043400 | -2.14143700 | 2.22782000  |
| C | -2.46494100 | -5.23395600 | 0.74821400  |
| H | -3.05348700 | -5.66390500 | -1.30181500 |
| H | -1.98390100 | -4.48559500 | 2.73442800  |
| H | -2.18168000 | -6.26439900 | 0.97396400  |
| H | 2.23446400  | -0.19875900 | -3.91194800 |
| H | -0.33475500 | 0.44563000  | -4.37539000 |
| H | -1.87481600 | -1.76088600 | -4.02938600 |
| C | 2.54968400  | -3.16170000 | -3.29073100 |
| H | 3.56995400  | -2.78105300 | -3.29039700 |
| C | 2.28586400  | -4.51398000 | -3.07979600 |
| H | 3.11194800  | -5.20735000 | -2.90769200 |
| C | 0.94040100  | -5.02696400 | -3.09707600 |
| H | 0.78341500  | -6.09555300 | -2.93492200 |
| C | -0.15181900 | -4.19595100 | -3.33837800 |
| H | -1.16468000 | -4.59847800 | -3.36963300 |

|                |           |          |          |
|----------------|-----------|----------|----------|
| Frequencies -- | -993.3147 | -10.0803 | -6.3992  |
| Frequencies -- | 6.4048    | 14.2263  | 19.0198  |
| Frequencies -- | 21.3449   | 23.9213  | 26.8926  |
| Frequencies -- | 27.4581   | 29.5243  | 33.7913  |
| Frequencies -- | 38.1163   | 41.4164  | 41.8929  |
| Frequencies -- | 44.0335   | 46.5276  | 48.8354  |
| Frequencies -- | 52.6205   | 54.7410  | 61.7907  |
| Frequencies -- | 67.4371   | 70.3791  | 73.0403  |
| Frequencies -- | 79.2445   | 82.1432  | 101.9627 |
| Frequencies -- | 104.8915  | 111.2204 | 113.7579 |
| Frequencies -- | 117.1123  | 120.3327 | 122.7246 |
| Frequencies -- | 124.6600  | 136.1348 | 138.5874 |
| Frequencies -- | 140.3003  | 141.9217 | 146.4122 |
| Frequencies -- | 156.1226  | 157.8900 | 161.1991 |
| Frequencies -- | 166.7346  | 168.5206 | 176.9314 |
| Frequencies -- | 193.7529  | 209.1250 | 209.7068 |
| Frequencies -- | 210.0375  | 215.3223 | 217.6406 |
| Frequencies -- | 222.2218  | 222.8348 | 228.1787 |
| Frequencies -- | 236.9062  | 246.7349 | 250.4435 |
| Frequencies -- | 255.2513  | 259.9797 | 264.3880 |
| Frequencies -- | 265.0591  | 265.4843 | 274.3544 |
| Frequencies -- | 275.0395  | 275.5658 | 281.4734 |
| Frequencies -- | 285.3402  | 302.0499 | 303.2096 |
| Frequencies -- | 309.6161  | 315.1937 | 324.4655 |
| Frequencies -- | 326.1048  | 328.5954 | 329.8394 |
| Frequencies -- | 335.6941  | 360.6211 | 369.7141 |
| Frequencies -- | 372.8989  | 376.7630 | 377.9541 |
| Frequencies -- | 382.2357  | 390.7483 | 395.7875 |

|                |           |           |           |
|----------------|-----------|-----------|-----------|
| Frequencies -- | 403.8486  | 405.4710  | 407.0155  |
| Frequencies -- | 407.4811  | 410.4927  | 410.9065  |
| Frequencies -- | 430.8750  | 432.7352  | 433.6047  |
| Frequencies -- | 436.6033  | 446.0949  | 451.0249  |
| Frequencies -- | 457.2945  | 464.0695  | 482.6249  |
| Frequencies -- | 486.3422  | 517.6831  | 525.1072  |
| Frequencies -- | 525.7349  | 539.6613  | 539.7586  |
| Frequencies -- | 543.0969  | 544.7206  | 547.0617  |
| Frequencies -- | 548.2620  | 551.4473  | 565.8818  |
| Frequencies -- | 580.2064  | 595.0307  | 597.2555  |
| Frequencies -- | 611.7789  | 615.8730  | 617.6617  |
| Frequencies -- | 620.0955  | 624.4522  | 624.6779  |
| Frequencies -- | 633.0922  | 634.9354  | 635.3975  |
| Frequencies -- | 637.0994  | 641.2345  | 642.2678  |
| Frequencies -- | 653.8482  | 656.7326  | 678.6358  |
| Frequencies -- | 688.8878  | 697.4196  | 707.4703  |
| Frequencies -- | 709.4291  | 709.7503  | 713.8127  |
| Frequencies -- | 714.1360  | 714.8613  | 723.0768  |
| Frequencies -- | 734.2117  | 735.0362  | 735.9742  |
| Frequencies -- | 742.4983  | 744.3561  | 745.1253  |
| Frequencies -- | 748.4164  | 760.7136  | 765.3068  |
| Frequencies -- | 767.7251  | 769.4712  | 773.2319  |
| Frequencies -- | 781.7098  | 789.2161  | 795.1270  |
| Frequencies -- | 805.1016  | 813.2462  | 843.6103  |
| Frequencies -- | 858.2588  | 859.1116  | 859.2612  |
| Frequencies -- | 861.9689  | 864.9345  | 868.7159  |
| Frequencies -- | 871.7248  | 876.8027  | 879.6778  |
| Frequencies -- | 884.7309  | 888.1772  | 903.9182  |
| Frequencies -- | 912.0947  | 912.9056  | 915.0092  |
| Frequencies -- | 928.6911  | 933.2254  | 935.1694  |
| Frequencies -- | 939.8121  | 942.4596  | 967.3356  |
| Frequencies -- | 980.2006  | 984.7757  | 985.6250  |
| Frequencies -- | 988.3674  | 993.1749  | 996.0489  |
| Frequencies -- | 1004.1014 | 1004.7599 | 1007.6466 |
| Frequencies -- | 1008.8728 | 1009.8916 | 1011.2274 |
| Frequencies -- | 1014.2982 | 1015.2445 | 1019.8428 |
| Frequencies -- | 1020.0278 | 1026.0781 | 1029.7010 |
| Frequencies -- | 1041.1759 | 1044.0068 | 1048.2988 |
| Frequencies -- | 1049.0487 | 1052.3554 | 1052.4888 |
| Frequencies -- | 1053.5114 | 1054.9825 | 1056.0797 |
| Frequencies -- | 1056.8826 | 1066.3373 | 1088.8678 |
| Frequencies -- | 1089.8004 | 1090.1242 | 1091.4580 |
| Frequencies -- | 1092.3559 | 1128.0463 | 1129.5891 |
| Frequencies -- | 1142.8035 | 1182.7209 | 1183.0458 |
| Frequencies -- | 1183.7393 | 1184.8046 | 1185.2997 |
| Frequencies -- | 1202.9652 | 1205.2157 | 1206.2880 |
| Frequencies -- | 1207.1043 | 1210.0064 | 1211.2222 |
| Frequencies -- | 1212.1984 | 1214.0224 | 1231.6905 |
| Frequencies -- | 1242.0297 | 1255.8380 | 1263.3630 |
| Frequencies -- | 1278.4378 | 1279.8904 | 1297.9773 |
| Frequencies -- | 1305.9255 | 1316.2331 | 1321.0683 |
| Frequencies -- | 1321.6059 | 1325.7960 | 1327.9203 |
| Frequencies -- | 1330.9081 | 1331.2422 | 1334.3908 |
| Frequencies -- | 1338.4800 | 1343.5103 | 1349.7687 |
| Frequencies -- | 1360.7396 | 1366.3527 | 1367.4251 |
| Frequencies -- | 1367.8853 | 1369.9598 | 1372.8328 |
| Frequencies -- | 1376.6406 | 1378.3878 | 1411.6352 |
| Frequencies -- | 1415.6118 | 1419.1529 | 1421.5723 |
| Frequencies -- | 1426.4041 | 1441.4340 | 1443.2445 |
| Frequencies -- | 1444.5739 | 1446.3661 | 1455.9474 |
| Frequencies -- | 1463.1373 | 1466.8134 | 1468.1534 |
| Frequencies -- | 1470.5132 | 1474.4054 | 1496.4198 |
| Frequencies -- | 1496.8187 | 1502.3696 | 1504.1510 |

|                |           |           |           |
|----------------|-----------|-----------|-----------|
| Frequencies -- | 1509.4558 | 1522.6114 | 1527.6606 |
| Frequencies -- | 1553.6522 | 1590.6735 | 1593.9639 |
| Frequencies -- | 1594.2962 | 1596.1178 | 1596.3636 |
| Frequencies -- | 1598.1461 | 1598.1960 | 1599.6377 |
| Frequencies -- | 1617.1850 | 1618.9284 | 1622.4473 |
| Frequencies -- | 1623.3421 | 1623.5685 | 1624.5061 |
| Frequencies -- | 1625.1605 | 1631.5030 | 1812.5825 |
| Frequencies -- | 2981.0769 | 3038.7048 | 3114.2416 |
| Frequencies -- | 3144.7142 | 3148.1176 | 3153.7884 |
| Frequencies -- | 3154.4997 | 3155.3109 | 3160.1597 |
| Frequencies -- | 3160.9023 | 3160.9563 | 3167.8016 |
| Frequencies -- | 3170.2730 | 3170.4067 | 3173.1399 |
| Frequencies -- | 3174.0857 | 3179.6197 | 3181.8624 |
| Frequencies -- | 3182.6580 | 3183.9257 | 3185.8684 |
| Frequencies -- | 3186.1972 | 3194.2230 | 3194.4955 |
| Frequencies -- | 3196.3518 | 3196.8715 | 3199.9459 |
| Frequencies -- | 3202.8195 | 3204.1350 | 3217.1236 |
| Frequencies -- | 3244.2871 | 3254.9781 | 3284.0875 |

**Catalyst 23:**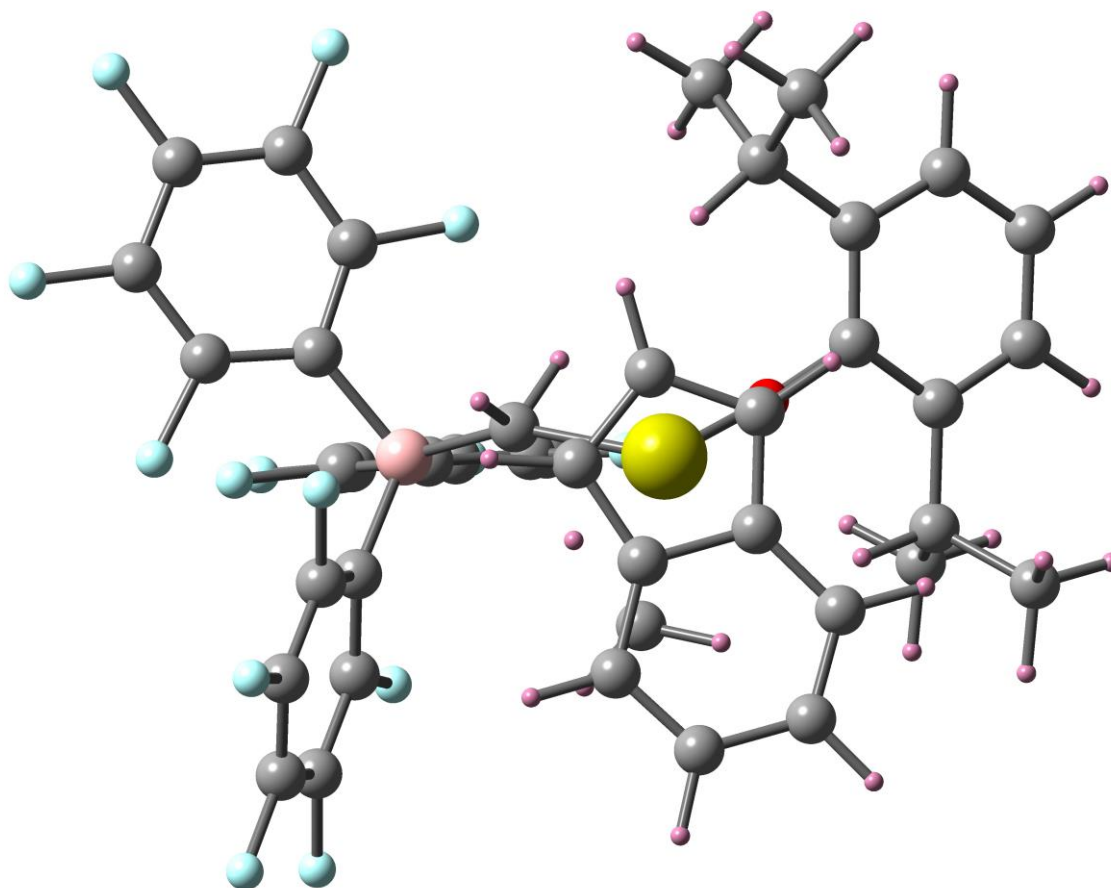

| vacuum        | toluene-like solvent | D3 dispersion |
|---------------|----------------------|---------------|
| -3235.1943619 | -3235.2071812        | -0.62628472   |

Imaginary frequency corresponding to vibration along the reaction coordinate:  $-1019 \text{ cm}^{-1}$ .

|    |            |             |             |
|----|------------|-------------|-------------|
| Ti | 1.83221200 | 1.03922700  | -0.78390200 |
| C  | 1.24432800 | 1.95303100  | 1.24208700  |
| H  | 1.19502400 | 1.29175100  | 2.11583800  |
| H  | 2.25685200 | 2.38520500  | 1.20611900  |
| H  | 0.54405600 | 2.78674400  | 1.35183100  |
| O  | 3.00040400 | -0.20046200 | -0.29776000 |
| C  | 4.03172600 | -1.14179900 | -0.18209400 |
| C  | 4.17291100 | -2.14929200 | -1.18790600 |
| C  | 4.89570000 | -1.05791100 | 0.95458100  |
| C  | 5.24489100 | -3.06101900 | -1.04033000 |
| C  | 5.94356600 | -2.00339600 | 1.04149900  |
| C  | 6.12573500 | -2.98964300 | 0.05439300  |
| H  | 5.38652200 | -3.84239100 | -1.78745500 |
| H  | 6.61971400 | -1.97285900 | 1.89635700  |
| H  | 6.94286300 | -3.70801100 | 0.14450200  |
| H  | 1.83281600 | 0.94106800  | -3.78318400 |
| C  | 2.03621400 | 1.70142900  | -3.03240400 |
| C  | 1.07860100 | 2.63718100  | -2.51950900 |
| C  | 3.30511600 | 1.91912100  | -2.39085100 |

|   |             |             |             |
|---|-------------|-------------|-------------|
| H | 0.04121600  | 2.72094500  | -2.82289000 |
| C | 1.77202700  | 3.51964300  | -1.60980500 |
| H | 4.22596700  | 1.38120500  | -2.59080600 |
| C | 3.16170900  | 3.06603300  | -1.52079000 |
| F | -1.61541600 | -4.14639300 | 4.53000500  |
| C | -1.58760100 | -3.20137100 | 3.51477600  |
| C | -2.78114500 | -2.70679900 | 2.96083600  |
| C | -0.36808400 | -2.71219100 | 3.02415100  |
| C | -2.72032600 | -1.75030500 | 1.93167500  |
| F | -4.00370800 | -3.15908900 | 3.44202800  |
| C | -0.36847500 | -1.75366700 | 1.99099200  |
| F | 0.83243400  | -3.17020200 | 3.56285200  |
| C | -1.52442000 | -1.22638100 | 1.38057400  |
| F | -3.95395600 | -1.27942000 | 1.46986600  |
| F | 0.91368200  | -1.31952200 | 1.60083000  |
| B | -1.58593600 | -0.15234900 | 0.10489700  |
| C | -2.50241100 | -0.94027000 | -1.06880800 |
| C | -2.19751100 | 1.34196200  | 0.52846500  |
| C | -0.08827100 | 0.17742100  | -0.61747100 |
| C | -3.81724200 | -0.61365900 | -1.48142600 |
| C | -1.99131700 | -2.08505900 | -1.72501600 |
| C | -2.42527400 | 1.80174700  | 1.84626600  |
| C | -2.45498800 | 2.33435700  | -0.44754900 |
| H | 0.46436600  | -0.77524200 | -0.72616900 |
| H | -0.34501200 | 0.61357500  | -1.59838400 |
| H | 0.51110100  | 1.17084400  | 0.44322100  |
| C | -4.53603700 | -1.31358000 | -2.47272500 |
| F | -4.51493200 | 0.44337100  | -0.89240600 |
| C | -2.66473000 | -2.82005500 | -2.71799300 |
| F | -0.72056100 | -2.58637900 | -1.37643400 |
| C | -2.90570100 | 3.08891300  | 2.17114100  |
| F | -2.14953100 | 0.98797500  | 2.95282100  |
| C | -2.92081400 | 3.63244100  | -0.18131000 |
| F | -2.24094300 | 2.04423700  | -1.80905500 |
| C | -3.95488700 | -2.42428900 | -3.10543100 |
| F | -5.82091700 | -0.91854800 | -2.82582800 |
| F | -2.06700300 | -3.92784700 | -3.31335700 |
| C | -3.16240800 | 4.01569300  | 1.14907000  |
| F | -3.10749300 | 3.45431200  | 3.49704500  |
| F | -3.13188400 | 4.54165600  | -1.21493400 |
| F | -4.64453300 | -3.12321300 | -4.08566900 |
| F | -3.62009300 | 5.29149100  | 1.44537000  |
| C | 3.21410600  | -2.29217500 | -2.38059100 |
| H | 2.43878800  | -1.51751600 | -2.29841000 |
| C | 4.70031700  | -0.02147200 | 2.07081100  |
| H | 3.86739500  | 0.63182600  | 1.78535700  |
| C | 2.47222000  | -3.66116000 | -2.35648100 |
| H | 3.16824400  | -4.50226800 | -2.49417400 |
| H | 1.94244100  | -3.80927400 | -1.40463800 |
| H | 1.72668600  | -3.70367900 | -3.16550500 |
| C | 3.93755200  | -2.07378100 | -3.74195000 |
| H | 4.44255300  | -1.09570000 | -3.78182500 |
| H | 4.69835100  | -2.84727600 | -3.92492200 |
| H | 3.21177800  | -2.12149500 | -4.56989700 |
| C | 4.29385300  | -0.70593400 | 3.41008000  |
| H | 3.39216200  | -1.32236200 | 3.28299800  |
| H | 5.09604400  | -1.35392700 | 3.79511000  |

|   |            |            |             |
|---|------------|------------|-------------|
| H | 4.08293100 | 0.05712600 | 4.17692000  |
| C | 5.95045200 | 0.88650300 | 2.25659700  |
| H | 6.82647800 | 0.31584700 | 2.59998000  |
| H | 6.22551000 | 1.38712800 | 1.31433600  |
| H | 5.74496700 | 1.66337300 | 3.01068800  |
| C | 1.35207300 | 4.67980900 | -0.88473100 |
| H | 0.32776300 | 5.04535200 | -0.97415400 |
| C | 2.28650800 | 5.35209900 | -0.09626700 |
| H | 1.99045700 | 6.25249300 | 0.44594900  |
| C | 3.64581900 | 4.89186900 | 0.01244200  |
| H | 4.34430300 | 5.45253000 | 0.63713200  |
| C | 4.08811500 | 3.76382300 | -0.68145100 |
| H | 5.12773600 | 3.43837700 | -0.61398900 |

|                |            |          |          |
|----------------|------------|----------|----------|
| Frequencies -- | -1018.7011 | 10.1194  | 17.3119  |
| Frequencies -- | 21.6795    | 23.3802  | 26.1713  |
| Frequencies -- | 28.8149    | 30.1146  | 32.1542  |
| Frequencies -- | 37.9564    | 40.3367  | 42.1935  |
| Frequencies -- | 48.2204    | 54.9339  | 57.2154  |
| Frequencies -- | 59.7721    | 69.3758  | 71.9817  |
| Frequencies -- | 78.0565    | 101.2689 | 107.2053 |
| Frequencies -- | 112.1078   | 116.7572 | 118.5212 |
| Frequencies -- | 123.6016   | 125.7837 | 126.5467 |
| Frequencies -- | 137.5180   | 142.0969 | 145.7689 |
| Frequencies -- | 148.2020   | 155.0400 | 157.4274 |
| Frequencies -- | 159.1003   | 162.0533 | 164.8597 |
| Frequencies -- | 172.0012   | 179.7513 | 202.5090 |
| Frequencies -- | 213.6918   | 215.5661 | 218.1371 |
| Frequencies -- | 219.1216   | 222.6303 | 224.6108 |
| Frequencies -- | 232.2849   | 241.8755 | 248.2455 |
| Frequencies -- | 251.6921   | 253.4295 | 264.3981 |
| Frequencies -- | 264.5474   | 264.9839 | 272.8085 |
| Frequencies -- | 274.6265   | 275.2500 | 276.3492 |
| Frequencies -- | 282.7341   | 291.5735 | 300.1516 |
| Frequencies -- | 302.7383   | 305.6352 | 309.8894 |
| Frequencies -- | 312.1959   | 315.1873 | 326.6093 |
| Frequencies -- | 328.0616   | 335.3190 | 352.1540 |
| Frequencies -- | 362.1135   | 373.8042 | 376.9503 |
| Frequencies -- | 377.7230   | 378.1505 | 381.3895 |
| Frequencies -- | 392.5305   | 396.1811 | 424.3279 |
| Frequencies -- | 430.9497   | 431.1941 | 432.7724 |
| Frequencies -- | 433.6298   | 437.1965 | 440.5220 |
| Frequencies -- | 451.0613   | 456.9112 | 463.6015 |
| Frequencies -- | 484.3885   | 531.6297 | 535.9941 |
| Frequencies -- | 538.3034   | 539.7113 | 543.0115 |
| Frequencies -- | 544.4378   | 546.0649 | 552.7256 |
| Frequencies -- | 565.1297   | 575.6414 | 595.7115 |
| Frequencies -- | 596.7295   | 600.2495 | 611.8305 |
| Frequencies -- | 616.8778   | 628.3756 | 634.9736 |
| Frequencies -- | 635.5995   | 637.6299 | 641.8775 |
| Frequencies -- | 657.2726   | 673.5347 | 707.8166 |
| Frequencies -- | 717.0810   | 722.2017 | 723.5038 |
| Frequencies -- | 726.5023   | 734.6370 | 736.2442 |
| Frequencies -- | 746.3409   | 748.2627 | 761.0399 |
| Frequencies -- | 761.6364   | 768.9901 | 770.7273 |
| Frequencies -- | 791.8333   | 798.1782 | 812.3884 |
| Frequencies -- | 816.6312   | 844.8671 | 862.3396 |
| Frequencies -- | 867.8534   | 869.5040 | 877.1271 |
| Frequencies -- | 878.6619   | 882.7229 | 886.7892 |
| Frequencies -- | 900.3811   | 903.2887 | 912.7352 |
| Frequencies -- | 919.4086   | 924.9567 | 932.7293 |

|                |           |           |           |
|----------------|-----------|-----------|-----------|
| Frequencies -- | 933.7966  | 937.4714  | 941.0828  |
| Frequencies -- | 963.3976  | 965.0521  | 976.9259  |
| Frequencies -- | 992.1084  | 1001.8689 | 1007.1441 |
| Frequencies -- | 1009.0212 | 1018.5183 | 1028.3528 |
| Frequencies -- | 1039.8588 | 1049.7239 | 1052.5424 |
| Frequencies -- | 1055.4275 | 1056.1849 | 1059.8760 |
| Frequencies -- | 1067.9235 | 1073.5358 | 1087.6805 |
| Frequencies -- | 1115.3136 | 1116.0475 | 1117.4228 |
| Frequencies -- | 1140.1120 | 1165.5454 | 1182.8754 |
| Frequencies -- | 1185.7460 | 1185.8568 | 1204.9945 |
| Frequencies -- | 1211.0241 | 1213.1314 | 1215.3261 |
| Frequencies -- | 1215.8880 | 1238.6433 | 1252.7273 |
| Frequencies -- | 1256.7896 | 1274.9836 | 1277.3932 |
| Frequencies -- | 1288.7292 | 1310.9896 | 1318.0210 |
| Frequencies -- | 1319.0331 | 1320.6741 | 1325.1735 |
| Frequencies -- | 1329.1458 | 1333.3545 | 1339.1743 |
| Frequencies -- | 1344.2817 | 1346.8934 | 1350.9282 |
| Frequencies -- | 1363.8826 | 1371.6066 | 1383.3131 |
| Frequencies -- | 1400.8158 | 1404.0293 | 1412.1821 |
| Frequencies -- | 1415.6444 | 1419.6358 | 1420.0607 |
| Frequencies -- | 1421.9786 | 1423.0027 | 1424.4386 |
| Frequencies -- | 1437.9487 | 1461.5646 | 1467.8271 |
| Frequencies -- | 1468.7250 | 1469.0640 | 1471.7511 |
| Frequencies -- | 1474.8685 | 1487.3295 | 1487.8922 |
| Frequencies -- | 1488.0723 | 1488.7419 | 1499.2624 |
| Frequencies -- | 1499.7780 | 1500.2947 | 1506.7206 |
| Frequencies -- | 1510.7445 | 1532.7478 | 1552.0858 |
| Frequencies -- | 1594.0746 | 1596.4663 | 1597.2329 |
| Frequencies -- | 1598.0192 | 1604.8843 | 1617.9698 |
| Frequencies -- | 1619.3718 | 1622.8017 | 1627.5084 |
| Frequencies -- | 1810.0799 | 2980.9590 | 3005.9807 |
| Frequencies -- | 3008.7301 | 3013.7589 | 3018.7135 |
| Frequencies -- | 3028.0279 | 3061.8830 | 3087.7171 |
| Frequencies -- | 3097.6427 | 3105.7181 | 3107.4292 |
| Frequencies -- | 3110.4742 | 3116.8612 | 3125.4591 |
| Frequencies -- | 3126.6003 | 3134.1596 | 3137.1561 |
| Frequencies -- | 3138.5627 | 3166.5600 | 3167.2911 |
| Frequencies -- | 3175.2551 | 3186.3721 | 3187.9908 |
| Frequencies -- | 3194.0700 | 3199.8468 | 3200.2934 |
| Frequencies -- | 3229.4856 | 3258.0479 | 3271.4879 |



**Catalyst 24:**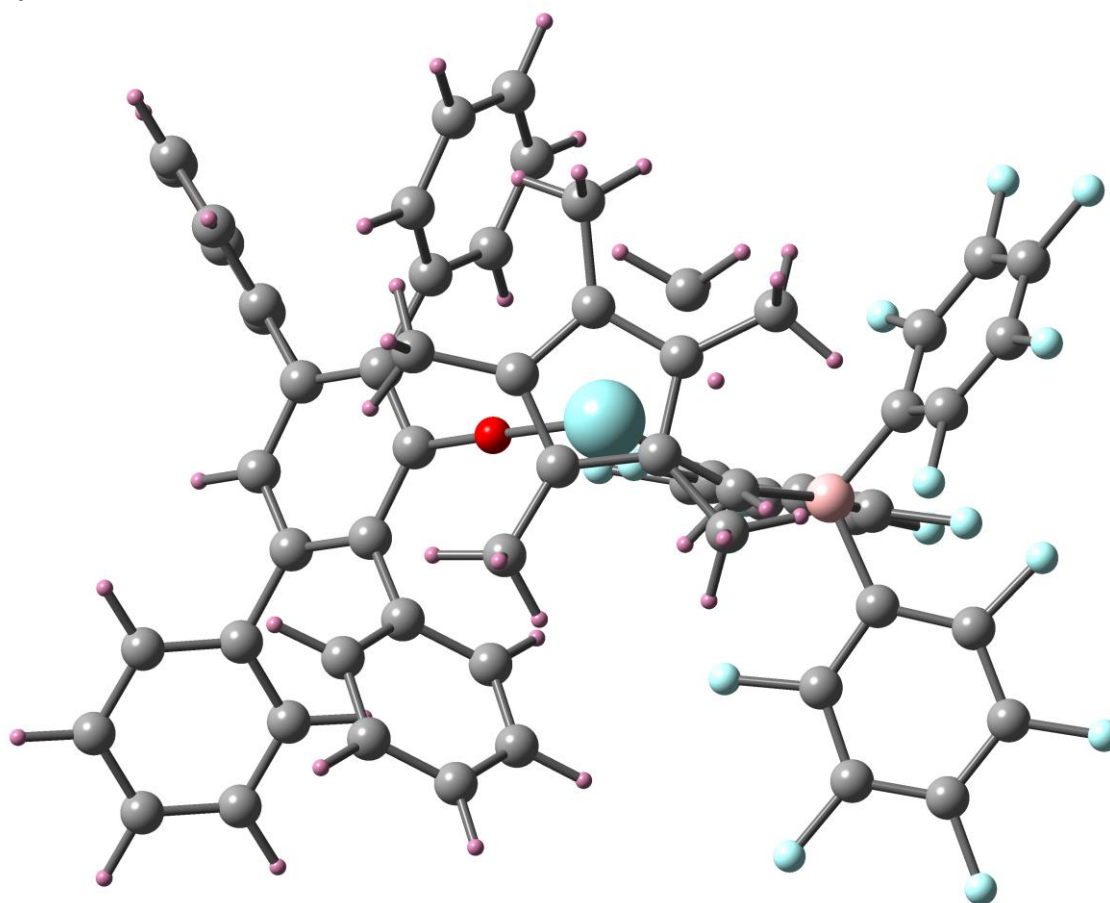

| vacuum        | toluene-like solvent | D3 dispersion |
|---------------|----------------------|---------------|
| -3954.6148725 | -3954.6302873        | -0.87806709   |

Imaginary frequency corresponding to vibration along the reaction coordinate:  $-1063 \text{ cm}^{-1}$ .

|    |             |             |             |
|----|-------------|-------------|-------------|
| Zr | -0.07046400 | -0.64507300 | -1.87787200 |
| C  | 0.74844200  | -2.57857900 | -0.63682000 |
| H  | 0.74086500  | -2.67030100 | 0.45742200  |
| H  | -0.18990300 | -3.04624900 | -0.97520300 |
| H  | 1.58501600  | -3.15999000 | -1.03989800 |
| O  | -1.82743300 | -0.33393600 | -1.08591400 |
| C  | -3.07144100 | -0.09269200 | -0.50069800 |
| C  | -3.61446500 | 1.23089700  | -0.54241500 |
| C  | -3.75263100 | -1.18095100 | 0.12812000  |
| C  | -4.87160600 | 1.46384300  | 0.09544100  |
| C  | -5.01545900 | -0.92593700 | 0.73998100  |
| C  | -5.54050900 | 0.38402400  | 0.71306900  |
| H  | -6.49469400 | 0.57241200  | 1.20310500  |
| C  | -0.20890400 | 0.06617600  | -4.28947400 |
| C  | 1.21656500  | -0.19166600 | -4.11989500 |
| C  | -0.90746400 | -1.19909900 | -4.20308400 |
| C  | 1.38938300  | -1.59995600 | -3.90330300 |
| C  | 0.07410100  | -2.22544900 | -3.92261000 |
| F  | 0.40622100  | 0.30606700  | 6.15000600  |

|   |             |             |             |
|---|-------------|-------------|-------------|
| C | 0.93558900  | 0.27591700  | 4.86743900  |
| C | 2.32085700  | 0.39219400  | 4.65745900  |
| C | 0.10065700  | 0.12347200  | 3.75087700  |
| C | 2.82710200  | 0.35240400  | 3.34574800  |
| F | 3.17267100  | 0.53241300  | 5.74680900  |
| C | 0.66541300  | 0.09647800  | 2.46014500  |
| F | -1.27741700 | -0.00671600 | 3.92345300  |
| C | 2.04054200  | 0.20413200  | 2.17620700  |
| F | 4.21860800  | 0.43625900  | 3.23247800  |
| F | -0.27141600 | -0.06643700 | 1.42048800  |
| B | 2.74757600  | 0.22845400  | 0.66099900  |
| C | 3.55058900  | 1.71611000  | 0.62386000  |
| C | 3.76987700  | -1.07124200 | 0.41115000  |
| C | 1.67032500  | 0.21096300  | -0.65134300 |
| C | 4.94945000  | 1.93902700  | 0.66705300  |
| C | 2.81314700  | 2.92346100  | 0.59920600  |
| C | 3.84358100  | -2.23686200 | 1.20825500  |
| C | 4.62184700  | -1.13216800 | -0.71706800 |
| H | 0.93148100  | 1.02775400  | -0.48365700 |
| H | 2.29179800  | 0.46244000  | -1.52660100 |
| H | 1.24131500  | -1.31692500 | -0.58957100 |
| C | 5.55630500  | 3.21208500  | 0.62561000  |
| F | 5.84730700  | 0.87547200  | 0.78495900  |
| C | 3.36485300  | 4.21680300  | 0.55509200  |
| F | 1.40423700  | 2.88943600  | 0.65264300  |
| C | 4.70712100  | -3.32496700 | 0.95966300  |
| F | 3.00180300  | -2.40681300 | 2.31773400  |
| C | 5.49947900  | -2.18749600 | -1.01564500 |
| F | 4.62886300  | -0.07114000 | -1.64270600 |
| C | 4.76021600  | 4.36656900  | 0.55832000  |
| F | 6.94068300  | 3.33678600  | 0.65913500  |
| F | 2.54113800  | 5.34077300  | 0.51051600  |
| C | 5.55335800  | -3.29984800 | -0.15928600 |
| F | 4.71289300  | -4.43132300 | 1.80271200  |
| F | 6.30061500  | -2.14887300 | -2.15411900 |
| F | 5.33832500  | 5.62745500  | 0.50997500  |
| F | 6.40443600  | -4.36218200 | -0.43079800 |
| C | -5.52438800 | 2.81834800  | 0.18852800  |
| C | -6.83639100 | 3.01358900  | -0.31739700 |
| C | -4.89404800 | 3.90279400  | 0.85266500  |
| C | -7.49153700 | 4.25612200  | -0.18180800 |
| H | -7.34337200 | 2.19133800  | -0.82740100 |
| C | -5.54914600 | 5.14329500  | 0.99649000  |
| H | -3.89569300 | 3.77334700  | 1.27177100  |
| C | -6.84927900 | 5.32803800  | 0.47596400  |
| H | -8.49851800 | 4.38489500  | -0.58614700 |
| H | -5.04635000 | 5.96120900  | 1.51794100  |
| H | -7.35534200 | 6.29003000  | 0.58588500  |
| C | -5.82590500 | -1.98308200 | 1.44566100  |
| C | -6.43931900 | -3.04997600 | 0.74046800  |
| C | -6.05413900 | -1.88228900 | 2.84285000  |
| C | -7.24976200 | -3.99052900 | 1.41063400  |
| H | -6.29498800 | -3.13878500 | -0.33734900 |
| C | -6.85771200 | -2.82611000 | 3.51743700  |
| H | -5.59115200 | -1.06868400 | 3.40538700  |
| C | -7.46008800 | -3.88500900 | 2.80331700  |
| H | -7.71752000 | -4.80077800 | 0.84601400  |

|   |             |             |             |
|---|-------------|-------------|-------------|
| H | -7.01148100 | -2.73357600 | 4.59521200  |
| H | -8.08523400 | -4.61473600 | 3.32320800  |
| C | -2.91698700 | 2.36006100  | -1.25421200 |
| C | -3.51742900 | 2.96480900  | -2.38993800 |
| C | -1.70594400 | 2.91214400  | -0.76351800 |
| C | -2.93896800 | 4.09522500  | -3.00357100 |
| H | -4.45678700 | 2.56515100  | -2.77624500 |
| C | -1.12444600 | 4.04598200  | -1.37335700 |
| H | -1.24428200 | 2.48865900  | 0.12827900  |
| C | -1.74137300 | 4.64403600  | -2.49406100 |
| H | -3.42980900 | 4.55402500  | -3.86535900 |
| H | -0.20905900 | 4.46901500  | -0.95667900 |
| H | -1.30201600 | 5.53242400  | -2.95372500 |
| C | -3.15108300 | -2.56022100 | 0.21416700  |
| C | -3.25258300 | -3.48167600 | -0.85814700 |
| C | -2.54571600 | -2.99690800 | 1.42070000  |
| C | -2.77792800 | -4.80550500 | -0.72802100 |
| H | -3.74113400 | -3.17221500 | -1.78470000 |
| C | -2.06811700 | -4.31765900 | 1.55445600  |
| H | -2.46343900 | -2.30486100 | 2.26005500  |
| C | -2.18489900 | -5.22910500 | 0.48174800  |
| H | -2.88867900 | -5.50741000 | -1.55865400 |
| H | -1.61483300 | -4.63558100 | 2.49624100  |
| H | -1.82744600 | -6.25558000 | 0.59032300  |
| C | -0.80168400 | 1.38015200  | -4.75379100 |
| H | -0.65245300 | 1.48247500  | -5.84338000 |
| H | -1.87783900 | 1.44379100  | -4.56056000 |
| H | -0.33128200 | 2.25194500  | -4.28113900 |
| C | 2.30862500  | 0.83474800  | -4.33840700 |
| H | 2.49416100  | 0.95304700  | -5.42020600 |
| H | 2.03537600  | 1.82767200  | -3.95273100 |
| H | 3.25874600  | 0.54600700  | -3.87487500 |
| C | -2.37514200 | -1.42136000 | -4.50503900 |
| H | -3.00241300 | -0.58202700 | -4.17624700 |
| H | -2.51787600 | -1.53034000 | -5.59436900 |
| H | -2.76272800 | -2.33366500 | -4.03443400 |
| C | 2.70358100  | -2.34745900 | -3.87027700 |
| H | 2.90591700  | -2.77395800 | -4.86833800 |
| H | 3.54912100  | -1.69828400 | -3.62115800 |
| H | 2.69964300  | -3.18885000 | -3.16417200 |
| C | -0.17454500 | -3.71992100 | -3.93167900 |
| H | -0.05336100 | -4.10791700 | -4.95819500 |
| H | 0.53450000  | -4.26663200 | -3.29638700 |
| H | -1.18861900 | -3.97979000 | -3.60331900 |

|                |            |          |          |
|----------------|------------|----------|----------|
| Frequencies -- | -1062.7418 | 8.9278   | 12.1590  |
| Frequencies -- | 15.7476    | 18.8665  | 22.4793  |
| Frequencies -- | 26.9120    | 28.2658  | 30.2782  |
| Frequencies -- | 33.4984    | 35.3365  | 37.4276  |
| Frequencies -- | 40.9213    | 41.9342  | 43.0145  |
| Frequencies -- | 44.5376    | 49.1903  | 50.8783  |
| Frequencies -- | 52.0248    | 56.4916  | 59.9964  |
| Frequencies -- | 65.4253    | 71.8902  | 73.9126  |
| Frequencies -- | 79.9144    | 84.4486  | 89.8278  |
| Frequencies -- | 101.9900   | 104.6992 | 111.0202 |
| Frequencies -- | 114.1582   | 117.0423 | 119.7282 |
| Frequencies -- | 120.2497   | 123.1761 | 125.8298 |
| Frequencies -- | 128.5247   | 129.8441 | 135.1115 |

|                |           |           |           |
|----------------|-----------|-----------|-----------|
| Frequencies -- | 137.7484  | 140.5144  | 141.5723  |
| Frequencies -- | 143.0762  | 147.2518  | 153.0460  |
| Frequencies -- | 155.9744  | 156.4461  | 158.5099  |
| Frequencies -- | 160.8163  | 161.9927  | 168.0203  |
| Frequencies -- | 175.0551  | 178.2911  | 187.3246  |
| Frequencies -- | 194.6373  | 209.0953  | 211.1292  |
| Frequencies -- | 213.2568  | 215.0508  | 217.4448  |
| Frequencies -- | 223.3039  | 224.7520  | 231.9842  |
| Frequencies -- | 247.1687  | 248.6752  | 256.1269  |
| Frequencies -- | 257.9526  | 264.1827  | 264.4360  |
| Frequencies -- | 264.9665  | 274.8352  | 275.6452  |
| Frequencies -- | 278.3257  | 283.7063  | 286.6580  |
| Frequencies -- | 293.8775  | 301.3981  | 301.9747  |
| Frequencies -- | 302.5711  | 309.0310  | 312.3639  |
| Frequencies -- | 320.3404  | 327.2359  | 329.0491  |
| Frequencies -- | 331.8232  | 336.4034  | 346.7164  |
| Frequencies -- | 359.9215  | 371.4052  | 376.1687  |
| Frequencies -- | 379.0736  | 381.3870  | 386.2647  |
| Frequencies -- | 389.7747  | 395.2430  | 399.5626  |
| Frequencies -- | 404.0530  | 404.9895  | 406.4129  |
| Frequencies -- | 410.0733  | 414.2471  | 430.8759  |
| Frequencies -- | 431.7410  | 433.2306  | 433.4890  |
| Frequencies -- | 449.8640  | 456.4994  | 463.2119  |
| Frequencies -- | 477.6143  | 498.8795  | 511.2512  |
| Frequencies -- | 522.2745  | 526.7267  | 537.9523  |
| Frequencies -- | 538.7343  | 540.1522  | 543.5842  |
| Frequencies -- | 544.2189  | 550.3200  | 550.4558  |
| Frequencies -- | 552.2975  | 568.4446  | 583.5356  |
| Frequencies -- | 592.3621  | 595.4024  | 604.9589  |
| Frequencies -- | 607.7817  | 614.2924  | 617.3452  |
| Frequencies -- | 617.8205  | 620.6756  | 624.9602  |
| Frequencies -- | 634.5966  | 634.7881  | 635.4765  |
| Frequencies -- | 637.3915  | 637.9404  | 640.4915  |
| Frequencies -- | 653.1767  | 657.5861  | 667.5151  |
| Frequencies -- | 688.4854  | 694.2581  | 695.3106  |
| Frequencies -- | 709.8349  | 710.0237  | 711.9457  |
| Frequencies -- | 716.2044  | 717.1949  | 719.7098  |
| Frequencies -- | 722.3941  | 731.9399  | 742.6122  |
| Frequencies -- | 743.8637  | 748.7037  | 759.2967  |
| Frequencies -- | 768.7466  | 773.2899  | 776.7337  |
| Frequencies -- | 779.0121  | 794.0872  | 799.1871  |
| Frequencies -- | 801.0090  | 808.1969  | 840.8204  |
| Frequencies -- | 858.9797  | 859.2798  | 860.0922  |
| Frequencies -- | 861.7354  | 867.5190  | 870.2928  |
| Frequencies -- | 876.0309  | 879.6238  | 901.7061  |
| Frequencies -- | 907.9022  | 912.0967  | 916.5934  |
| Frequencies -- | 930.4509  | 937.2258  | 939.8965  |
| Frequencies -- | 945.4243  | 957.4821  | 967.8620  |
| Frequencies -- | 970.2829  | 985.0911  | 986.5577  |
| Frequencies -- | 990.2874  | 995.5402  | 997.4210  |
| Frequencies -- | 1004.1691 | 1005.0084 | 1008.8363 |
| Frequencies -- | 1012.1575 | 1013.4971 | 1016.6319 |
| Frequencies -- | 1017.5400 | 1021.0773 | 1025.3209 |
| Frequencies -- | 1027.1102 | 1039.0385 | 1039.8344 |
| Frequencies -- | 1043.4983 | 1044.1245 | 1044.9749 |
| Frequencies -- | 1045.6609 | 1048.2832 | 1049.5800 |
| Frequencies -- | 1049.8155 | 1051.4587 | 1052.3274 |
| Frequencies -- | 1055.3850 | 1055.9248 | 1056.3993 |
| Frequencies -- | 1084.9082 | 1086.7708 | 1087.6308 |
| Frequencies -- | 1089.1660 | 1089.7970 | 1091.2870 |
| Frequencies -- | 1091.6447 | 1124.1814 | 1130.5230 |
| Frequencies -- | 1131.3880 | 1171.6884 | 1173.7526 |
| Frequencies -- | 1182.4593 | 1182.6765 | 1182.7396 |

|                |           |           |           |
|----------------|-----------|-----------|-----------|
| Frequencies -- | 1184.9386 | 1203.6684 | 1205.3630 |
| Frequencies -- | 1206.1527 | 1207.9202 | 1210.5108 |
| Frequencies -- | 1211.9524 | 1213.3147 | 1231.3873 |
| Frequencies -- | 1256.7945 | 1269.3290 | 1279.9539 |
| Frequencies -- | 1301.5620 | 1306.7442 | 1317.2028 |
| Frequencies -- | 1319.7065 | 1323.4438 | 1326.3016 |
| Frequencies -- | 1327.0524 | 1331.0120 | 1332.4861 |
| Frequencies -- | 1334.2505 | 1337.8605 | 1344.0552 |
| Frequencies -- | 1350.1819 | 1366.6497 | 1367.7386 |
| Frequencies -- | 1369.3064 | 1370.3339 | 1379.7973 |
| Frequencies -- | 1382.7068 | 1410.2993 | 1410.9411 |
| Frequencies -- | 1415.8562 | 1420.2160 | 1420.4542 |
| Frequencies -- | 1420.8832 | 1425.9268 | 1427.4602 |
| Frequencies -- | 1428.4718 | 1435.5293 | 1441.6788 |
| Frequencies -- | 1442.9252 | 1443.8721 | 1444.9338 |
| Frequencies -- | 1447.8002 | 1448.4709 | 1456.9432 |
| Frequencies -- | 1465.5581 | 1467.7109 | 1468.6969 |
| Frequencies -- | 1470.5964 | 1471.4036 | 1485.0706 |
| Frequencies -- | 1491.3396 | 1491.5271 | 1496.6682 |
| Frequencies -- | 1497.7943 | 1499.6484 | 1500.6626 |
| Frequencies -- | 1502.6196 | 1505.6446 | 1508.3235 |
| Frequencies -- | 1509.5431 | 1510.2381 | 1516.4496 |
| Frequencies -- | 1521.6615 | 1525.9234 | 1531.3928 |
| Frequencies -- | 1591.2805 | 1593.3159 | 1595.1378 |
| Frequencies -- | 1595.3966 | 1597.0081 | 1597.0921 |
| Frequencies -- | 1598.1521 | 1601.5261 | 1617.8375 |
| Frequencies -- | 1620.4695 | 1622.0641 | 1622.3293 |
| Frequencies -- | 1623.4404 | 1623.8019 | 1624.4799 |
| Frequencies -- | 1829.0141 | 2927.4439 | 3010.8128 |
| Frequencies -- | 3011.7894 | 3012.1943 | 3013.0310 |
| Frequencies -- | 3015.5299 | 3026.7381 | 3083.9488 |
| Frequencies -- | 3097.3550 | 3103.7989 | 3104.6510 |
| Frequencies -- | 3107.4278 | 3113.3004 | 3127.9848 |
| Frequencies -- | 3144.8488 | 3149.1551 | 3151.6902 |
| Frequencies -- | 3152.0550 | 3152.4012 | 3153.8942 |
| Frequencies -- | 3155.7019 | 3159.8191 | 3160.4891 |
| Frequencies -- | 3161.4805 | 3166.2088 | 3169.4429 |
| Frequencies -- | 3171.8877 | 3172.3198 | 3172.9501 |
| Frequencies -- | 3173.0901 | 3176.4332 | 3182.6339 |
| Frequencies -- | 3183.3333 | 3183.8136 | 3185.4198 |
| Frequencies -- | 3191.0053 | 3193.1087 | 3193.8520 |
| Frequencies -- | 3196.3827 | 3197.8199 | 3208.1674 |

**Catalyst 30:**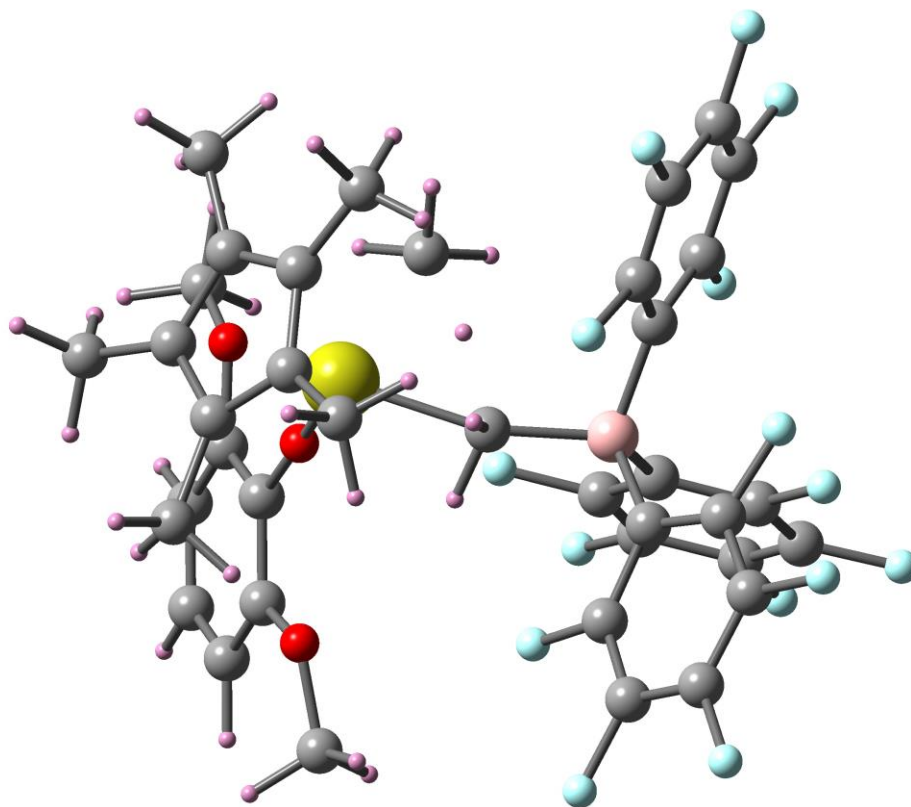

| vacuum        | toluene-like solvent | D3 dispersion |
|---------------|----------------------|---------------|
| -3271.3036559 | -3271.3153959        | -0.59671304   |

Imaginary frequency corresponding to vibration along the reaction coordinate:  $-1075 \text{ cm}^{-1}$ .

|    |             |             |             |
|----|-------------|-------------|-------------|
| Ti | -1.93386500 | 1.30519300  | 0.36532700  |
| C  | -1.32663600 | 1.67295900  | -1.83889700 |
| H  | -0.84161900 | 1.00124700  | -2.56185800 |
| H  | -2.40402700 | 1.61239700  | -2.04965400 |
| H  | -0.96271600 | 2.69296000  | -1.99299300 |
| O  | -3.08123100 | -0.01397900 | 0.07983100  |
| C  | -4.00694200 | -1.01656400 | -0.01523000 |
| C  | -3.99854900 | -2.07667100 | 0.93974200  |
| C  | -4.94268500 | -1.03056600 | -1.08959200 |
| C  | -4.92309000 | -3.13960500 | 0.81654100  |
| C  | -5.86201300 | -2.09916600 | -1.20340100 |
| C  | -5.84048900 | -3.13912500 | -0.25262500 |
| H  | -4.92726700 | -3.95972200 | 1.53116100  |
| H  | -6.58055800 | -2.13377500 | -2.01926000 |
| H  | -6.54894200 | -3.96400700 | -0.34850600 |
| C  | -1.51661800 | 2.98608400  | 2.12718600  |
| C  | -1.56691000 | 3.73595700  | 0.90422200  |
| C  | -2.80566600 | 2.32857400  | 2.30563100  |
| C  | -2.88581200 | 3.54962000  | 0.31852400  |
| C  | -3.66413600 | 2.72272700  | 1.21205200  |
| F  | 1.24390800  | -5.44698900 | -2.95780900 |

|   |             |             |             |
|---|-------------|-------------|-------------|
| C | 1.27688300  | -4.20985000 | -2.32797300 |
| C | 2.49939800  | -3.62822700 | -1.95157900 |
| C | 0.09119400  | -3.50950000 | -2.06162400 |
| C | 2.49963900  | -2.37673500 | -1.30955800 |
| F | 3.69138400  | -4.29078500 | -2.22403000 |
| C | 0.15237000  | -2.25645100 | -1.41912300 |
| F | -1.13533600 | -4.05448800 | -2.43731500 |
| C | 1.33952600  | -1.62666900 | -0.99369900 |
| F | 3.76342200  | -1.85361500 | -1.01222100 |
| F | -1.09021700 | -1.62972200 | -1.23985900 |
| B | 1.46215900  | -0.18789200 | -0.15365000 |
| C | 2.35774200  | -0.59236700 | 1.22200000  |
| C | 2.15530200  | 1.02864400  | -1.06655200 |
| C | 0.00974700  | 0.45805800  | 0.42382300  |
| C | 3.69641400  | -0.22614200 | 1.50605000  |
| C | 1.79587800  | -1.41830400 | 2.22495000  |
| C | 2.35545900  | 0.99926500  | -2.46627300 |
| C | 2.52415900  | 2.26788700  | -0.49200300 |
| H | -0.57572800 | -0.35935700 | 0.89832400  |
| H | 0.31951200  | 1.20941200  | 1.16889500  |
| H | -0.60366100 | 1.09025200  | -0.85587700 |
| C | 4.39050000  | -0.58917800 | 2.67917100  |
| F | 4.44705800  | 0.52139700  | 0.59605900  |
| C | 2.44308700  | -1.81104800 | 3.41117600  |
| F | 0.49494700  | -1.94067300 | 2.06633900  |
| C | 2.91057600  | 2.05745200  | -3.21772600 |
| F | 1.97239100  | -0.11391400 | -3.22835500 |
| C | 3.07580000  | 3.35494300  | -1.18971300 |
| F | 2.34657600  | 2.47476400  | 0.88957100  |
| C | 3.75843800  | -1.38333200 | 3.64925000  |
| F | 5.70214700  | -0.17472600 | 2.88260200  |
| F | 1.79190100  | -2.61681600 | 4.34457000  |
| C | 3.28247500  | 3.24817600  | -2.57527400 |
| F | 3.07666000  | 1.93745100  | -4.59343300 |
| F | 3.40581500  | 4.53494100  | -0.52720900 |
| F | 4.42206000  | -1.74745100 | 4.81299600  |
| F | 3.82054000  | 4.30622400  | -3.29477900 |
| C | -3.42895700 | 4.27778800  | -0.88995800 |
| H | -3.94621400 | 5.19981300  | -0.57194400 |
| H | -2.63756900 | 4.57838000  | -1.58821900 |
| H | -4.15839300 | 3.67300900  | -1.44727300 |
| C | -0.50573800 | 4.67912200  | 0.38615600  |
| H | -0.42942000 | 4.67365800  | -0.71000300 |
| H | -0.75569000 | 5.71360600  | 0.68040300  |
| H | 0.48588800  | 4.45717000  | 0.79428800  |
| C | -0.40126200 | 2.98663200  | 3.14875500  |
| H | 0.57008400  | 3.24687100  | 2.71337600  |
| H | -0.61984700 | 3.73162300  | 3.93352800  |
| H | -0.29278500 | 2.01579300  | 3.65359700  |
| C | -3.21814600 | 1.53708900  | 3.52755400  |
| H | -2.38724000 | 0.95123600  | 3.94454500  |
| H | -3.56244600 | 2.22297600  | 4.32150900  |
| H | -4.03682900 | 0.83870000  | 3.31399600  |
| C | -5.13612600 | 2.41428000  | 1.06633600  |
| H | -5.43547900 | 1.53314300  | 1.64762200  |
| H | -5.73147200 | 3.26820300  | 1.43477000  |
| H | -5.42431900 | 2.23763600  | 0.02158000  |

|   |             |             |             |
|---|-------------|-------------|-------------|
| O | -3.03921700 | -1.94895800 | 1.94490000  |
| O | -4.85985800 | 0.05856400  | -1.96738200 |
| C | -2.79271500 | -3.08903100 | 2.84076100  |
| H | -2.55559700 | -3.99836800 | 2.26596900  |
| H | -1.92120400 | -2.79385100 | 3.43552600  |
| H | -3.65820400 | -3.27097600 | 3.49943600  |
| C | -5.67424300 | 0.03047300  | -3.18940100 |
| H | -5.38838900 | 0.93509100  | -3.73994200 |
| H | -5.44809400 | -0.86035000 | -3.79715300 |
| H | -6.75150000 | 0.06383400  | -2.95580600 |

|                |            |           |           |
|----------------|------------|-----------|-----------|
| Frequencies -- | -1075.1603 | 6.6310    | 18.4921   |
| Frequencies -- | 21.6846    | 25.9156   | 28.1977   |
| Frequencies -- | 29.5651    | 30.4898   | 32.0149   |
| Frequencies -- | 37.8624    | 39.8684   | 45.7961   |
| Frequencies -- | 49.7199    | 51.1688   | 64.5539   |
| Frequencies -- | 66.7690    | 88.4804   | 98.4158   |
| Frequencies -- | 101.2052   | 103.9945  | 106.5134  |
| Frequencies -- | 109.5889   | 111.0543  | 114.0426  |
| Frequencies -- | 115.1166   | 118.2998  | 122.2121  |
| Frequencies -- | 125.3369   | 134.7706  | 136.6959  |
| Frequencies -- | 138.8343   | 141.7243  | 144.6066  |
| Frequencies -- | 148.2170   | 154.6062  | 158.9287  |
| Frequencies -- | 159.9720   | 160.8090  | 164.5362  |
| Frequencies -- | 169.1160   | 172.4000  | 181.8716  |
| Frequencies -- | 185.3640   | 188.1986  | 197.6638  |
| Frequencies -- | 201.8350   | 212.6514  | 216.9134  |
| Frequencies -- | 219.8601   | 223.1766  | 225.7918  |
| Frequencies -- | 239.8163   | 260.6615  | 262.3098  |
| Frequencies -- | 264.3899   | 265.1101  | 265.1449  |
| Frequencies -- | 274.8896   | 276.1214  | 277.0541  |
| Frequencies -- | 278.5412   | 287.1682  | 289.4362  |
| Frequencies -- | 299.6478   | 301.3977  | 302.6701  |
| Frequencies -- | 304.7817   | 306.7412  | 310.9685  |
| Frequencies -- | 326.0203   | 327.8555  | 334.0829  |
| Frequencies -- | 344.8132   | 347.2302  | 358.9571  |
| Frequencies -- | 361.7539   | 370.8301  | 374.9911  |
| Frequencies -- | 376.6184   | 377.5362  | 380.2866  |
| Frequencies -- | 383.3633   | 390.8974  | 400.3635  |
| Frequencies -- | 403.1379   | 431.5582  | 432.3560  |
| Frequencies -- | 434.1936   | 450.2677  | 456.5631  |
| Frequencies -- | 463.7874   | 481.6174  | 518.4438  |
| Frequencies -- | 530.1760   | 533.7404  | 535.9376  |
| Frequencies -- | 537.8372   | 540.8012  | 545.1587  |
| Frequencies -- | 552.7346   | 555.4393  | 570.2356  |
| Frequencies -- | 577.4580   | 582.0020  | 593.1672  |
| Frequencies -- | 600.2593   | 600.9407  | 604.7968  |
| Frequencies -- | 609.3323   | 614.6208  | 634.1551  |
| Frequencies -- | 636.4472   | 638.4085  | 642.1552  |
| Frequencies -- | 653.3472   | 672.2464  | 699.9835  |
| Frequencies -- | 717.3884   | 720.5077  | 723.6346  |
| Frequencies -- | 726.9064   | 733.6381  | 745.1672  |
| Frequencies -- | 748.0224   | 759.0859  | 761.8142  |
| Frequencies -- | 769.8577   | 801.2230  | 803.2065  |
| Frequencies -- | 842.1750   | 842.6740  | 852.3590  |
| Frequencies -- | 872.9035   | 881.0248  | 886.9484  |
| Frequencies -- | 903.9414   | 912.7871  | 920.8250  |
| Frequencies -- | 929.6096   | 950.8122  | 969.1692  |
| Frequencies -- | 971.4820   | 986.7291  | 1015.0526 |
| Frequencies -- | 1018.9057  | 1028.8342 | 1040.2288 |
| Frequencies -- | 1042.4294  | 1044.9428 | 1046.3095 |
| Frequencies -- | 1047.6838  | 1049.6852 | 1051.1265 |



|                |           |           |           |
|----------------|-----------|-----------|-----------|
| Frequencies -- | 1054.5952 | 1057.1222 | 1083.0307 |
| Frequencies -- | 1087.5437 | 1089.2474 | 1096.9105 |
| Frequencies -- | 1100.0735 | 1125.8429 | 1126.9359 |
| Frequencies -- | 1127.8800 | 1167.7597 | 1171.6224 |
| Frequencies -- | 1174.7743 | 1176.8423 | 1206.8622 |
| Frequencies -- | 1208.1072 | 1211.7683 | 1214.8304 |
| Frequencies -- | 1237.1179 | 1255.2156 | 1268.0415 |
| Frequencies -- | 1297.5798 | 1309.7864 | 1317.5293 |
| Frequencies -- | 1319.4533 | 1326.0366 | 1337.6923 |
| Frequencies -- | 1343.9214 | 1350.6890 | 1360.5013 |
| Frequencies -- | 1376.9567 | 1408.3013 | 1410.7748 |
| Frequencies -- | 1412.7070 | 1418.9458 | 1421.8925 |
| Frequencies -- | 1422.4724 | 1426.0752 | 1426.8095 |
| Frequencies -- | 1428.3364 | 1434.5499 | 1445.8858 |
| Frequencies -- | 1449.9728 | 1452.7661 | 1456.3620 |
| Frequencies -- | 1464.3857 | 1466.8159 | 1468.2208 |
| Frequencies -- | 1469.5931 | 1471.1587 | 1474.4235 |
| Frequencies -- | 1477.5636 | 1482.6959 | 1484.1023 |
| Frequencies -- | 1486.2140 | 1487.5292 | 1488.1198 |
| Frequencies -- | 1490.8321 | 1492.5838 | 1497.0169 |
| Frequencies -- | 1499.2672 | 1500.2740 | 1505.8785 |
| Frequencies -- | 1508.1944 | 1510.2668 | 1515.2618 |
| Frequencies -- | 1526.1290 | 1590.9958 | 1594.5606 |
| Frequencies -- | 1596.5624 | 1599.2113 | 1607.2835 |
| Frequencies -- | 1616.7439 | 1619.9957 | 1621.9280 |
| Frequencies -- | 1821.8062 | 2942.4819 | 3001.2350 |
| Frequencies -- | 3004.1919 | 3007.9656 | 3009.2141 |
| Frequencies -- | 3010.4218 | 3012.6523 | 3013.6765 |
| Frequencies -- | 3036.2033 | 3089.9897 | 3097.7555 |
| Frequencies -- | 3097.8447 | 3101.1815 | 3101.6925 |
| Frequencies -- | 3103.2267 | 3104.3530 | 3106.0182 |
| Frequencies -- | 3132.5422 | 3141.1193 | 3143.1194 |
| Frequencies -- | 3149.7117 | 3156.0408 | 3157.5173 |
| Frequencies -- | 3168.0611 | 3174.2078 | 3177.5227 |
| Frequencies -- | 3192.3655 | 3215.8462 | 3223.7099 |

**Catalyst 31:**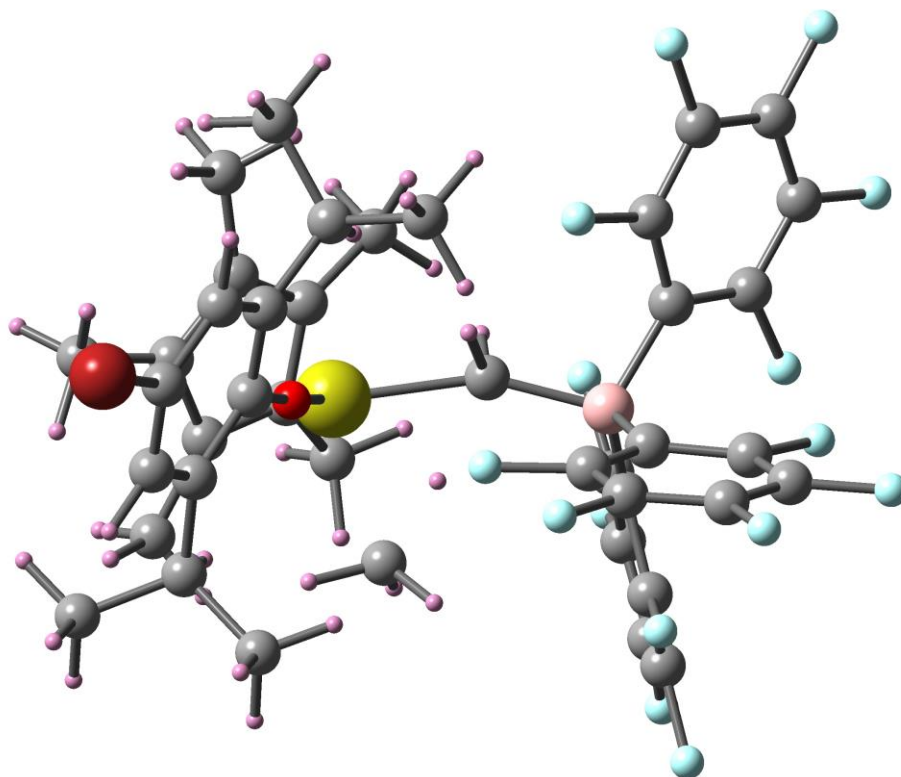

| vacuum        | toluene-like solvent | D3 dispersion |
|---------------|----------------------|---------------|
| -3290.6528385 | -3290.6636299        | -0.67960021   |

Imaginary frequency corresponding to vibration along the reaction coordinate:  $-1010\text{ cm}^{-1}$ .

|    |             |             |             |
|----|-------------|-------------|-------------|
| Ti | -0.77571600 | 1.84830400  | 0.49549600  |
| C  | -0.03239500 | 2.14201300  | -1.70988500 |
| H  | 0.08073800  | 1.35267600  | -2.46570500 |
| H  | -1.01532200 | 2.59703700  | -1.88000600 |
| H  | 0.74101400  | 2.90267300  | -1.84954000 |
| O  | -2.28781600 | 0.93172600  | 0.21708000  |
| C  | -3.54028500 | 0.31715200  | 0.11301900  |
| C  | -3.91332400 | -0.68647300 | 1.06342900  |
| C  | -4.41063600 | 0.69486000  | -0.96117500 |
| C  | -5.19678500 | -1.27044900 | 0.94141800  |
| C  | -5.67835600 | 0.07488100  | -1.04091600 |
| C  | -6.06350000 | -0.88360800 | -0.09071900 |
| H  | -5.50394400 | -2.03624900 | 1.65026200  |
| H  | -6.35628300 | 0.33851000  | -1.84955900 |
| C  | 0.25628000  | 3.31626000  | 2.22807000  |
| C  | 0.31806600  | 4.07877300  | 1.01670700  |
| C  | -1.14438100 | 3.02920300  | 2.50617300  |
| C  | -1.04476400 | 4.28520400  | 0.54382600  |
| C  | -1.94798100 | 3.68154700  | 1.49460200  |
| F  | 0.34372300  | -5.36702800 | -3.11526600 |
| C  | 0.73581300  | -4.21631500 | -2.44694000 |
| C  | 2.07988700  | -4.01605600 | -2.08842200 |

|   |             |             |             |
|---|-------------|-------------|-------------|
| C | -0.19875500 | -3.22215000 | -2.12182200 |
| C | 2.44675500  | -2.84109800 | -1.40717500 |
| F | 3.03108800  | -4.97394600 | -2.41858600 |
| C | 0.22827800  | -2.06466800 | -1.44176300 |
| F | -1.53677200 | -3.38201800 | -2.47462500 |
| C | 1.55162000  | -1.80799500 | -1.03263600 |
| F | 3.81280600  | -2.70577800 | -1.13644300 |
| F | -0.78725900 | -1.12021100 | -1.20216100 |
| B | 2.08940000  | -0.48286700 | -0.17019600 |
| C | 2.90756900  | -1.14329300 | 1.15245700  |
| C | 3.04530800  | 0.52791800  | -1.09689400 |
| C | 0.87137900  | 0.50373100  | 0.48652100  |
| C | 4.30856400  | -1.16361000 | 1.36400500  |
| C | 2.19454600  | -1.80526700 | 2.17983100  |
| C | 3.17552100  | 0.48248600  | -2.50458800 |
| C | 3.76899400  | 1.59782300  | -0.52083100 |
| H | 0.09581200  | -0.15439500 | 0.93421100  |
| H | 1.38493700  | 1.09868100  | 1.25821800  |
| H | 0.44987600  | 1.34715100  | -0.75579700 |
| C | 4.93619600  | -1.73132900 | 2.49227800  |
| F | 5.18749300  | -0.62647700 | 0.42086800  |
| C | 2.76893000  | -2.39135100 | 3.32299800  |
| F | 0.79320500  | -1.94048400 | 2.09195600  |
| C | 3.97833100  | 1.36151800  | -3.26313900 |
| F | 2.46286300  | -0.45366400 | -3.26698500 |
| C | 4.57808900  | 2.50486800  | -1.22454200 |
| F | 3.70952700  | 1.80637800  | 0.86971200  |
| C | 4.16186900  | -2.34650900 | 3.48894800  |
| F | 6.31937100  | -1.69492400 | 2.62499400  |
| F | 1.97162700  | -3.00956200 | 4.28343500  |
| C | 4.69532400  | 2.38156100  | -2.61909700 |
| F | 4.05113300  | 1.23692500  | -4.64586800 |
| F | 5.25067800  | 3.52589100  | -0.55786200 |
| F | 4.75978500  | -2.90687900 | 4.60867800  |
| F | 5.48271800  | 3.26425300  | -3.34404800 |
| C | -2.97814400 | -1.20526000 | 2.16710700  |
| H | -2.06958400 | -0.58842600 | 2.16755500  |
| C | -3.99397900 | 1.68104800  | -2.06274800 |
| H | -3.12201700 | 2.23702500  | -1.69742900 |
| C | -2.53700100 | -2.67016700 | 1.86936600  |
| H | -3.39312700 | -3.36071900 | 1.90906600  |
| H | -2.08223300 | -2.75361600 | 0.87313000  |
| H | -1.79639800 | -3.00077200 | 2.61258300  |
| C | -3.60712700 | -1.10255300 | 3.58668500  |
| H | -3.95508500 | -0.08224300 | 3.80807400  |
| H | -4.46625200 | -1.77961600 | 3.70434300  |
| H | -2.86172300 | -1.38521400 | 4.34683100  |
| C | -3.54998200 | 0.90733000  | -3.34186800 |
| H | -4.39179900 | 0.34644800  | -3.77579700 |
| H | -3.18105800 | 1.60903300  | -4.10742500 |
| H | -2.75003900 | 0.18802200  | -3.11604600 |
| C | -5.08592300 | 2.73402900  | -2.40296400 |
| H | -5.96237000 | 2.28353300  | -2.89136200 |
| H | -5.43832000 | 3.26065600  | -1.50245400 |
| H | -4.67741200 | 3.48184900  | -3.10168100 |
| C | 1.39614200  | 3.00160400  | 3.16999200  |
| H | 2.37303000  | 3.02438000  | 2.67592500  |

|    |             |             |             |
|----|-------------|-------------|-------------|
| H  | 1.41888200  | 3.75229500  | 3.97914300  |
| H  | 1.28569400  | 2.01970400  | 3.65267400  |
| C  | 1.54861600  | 4.72970400  | 0.42953700  |
| H  | 1.60917500  | 5.77577300  | 0.77843300  |
| H  | 2.47445100  | 4.23367700  | 0.73854200  |
| H  | 1.53054400  | 4.76744600  | -0.66812200 |
| C  | -1.65581700 | 2.39270000  | 3.77950800  |
| H  | -2.70173500 | 2.07676500  | 3.69491100  |
| H  | -1.06266300 | 1.51894200  | 4.08546000  |
| H  | -1.60040800 | 3.12142900  | 4.60701200  |
| C  | -1.43894500 | 5.19154800  | -0.60092300 |
| H  | -1.46471100 | 6.23917800  | -0.25382400 |
| H  | -0.72764100 | 5.15016300  | -1.43640900 |
| H  | -2.43748000 | 4.96061900  | -0.99547100 |
| C  | -3.45196900 | 3.82268500  | 1.51788700  |
| H  | -3.95335700 | 2.93556500  | 1.92507500  |
| H  | -3.72929400 | 4.67839500  | 2.15812900  |
| H  | -3.87100400 | 4.01448700  | 0.52282400  |
| Br | -7.84319000 | -1.71368700 | -0.22212700 |

|                |            |          |          |
|----------------|------------|----------|----------|
| Frequencies -- | -1010.1888 | 10.2566  | 14.9443  |
| Frequencies -- | 20.0905    | 25.9591  | 27.9980  |
| Frequencies -- | 28.6298    | 31.8379  | 34.7729  |
| Frequencies -- | 37.1286    | 40.6007  | 43.0914  |
| Frequencies -- | 47.0057    | 54.5077  | 57.9844  |
| Frequencies -- | 66.7316    | 69.0176  | 79.7240  |
| Frequencies -- | 90.7290    | 93.1526  | 102.0733 |
| Frequencies -- | 103.7439   | 111.0534 | 111.3795 |
| Frequencies -- | 114.3258   | 117.9101 | 119.8882 |
| Frequencies -- | 122.2106   | 123.7118 | 125.3817 |
| Frequencies -- | 127.9465   | 135.4876 | 136.5508 |
| Frequencies -- | 141.5397   | 142.6273 | 145.2893 |
| Frequencies -- | 147.3265   | 149.5270 | 156.3618 |
| Frequencies -- | 159.1958   | 161.6743 | 166.2263 |
| Frequencies -- | 170.5132   | 174.5601 | 181.4645 |
| Frequencies -- | 188.2289   | 199.5484 | 208.4886 |
| Frequencies -- | 214.3294   | 217.2641 | 219.8428 |
| Frequencies -- | 221.2011   | 223.5024 | 232.9938 |
| Frequencies -- | 235.5190   | 237.7294 | 243.1290 |
| Frequencies -- | 251.9248   | 253.4611 | 260.6431 |
| Frequencies -- | 264.4269   | 264.6559 | 264.8544 |
| Frequencies -- | 275.5134   | 276.6591 | 278.3139 |
| Frequencies -- | 283.0952   | 289.2260 | 295.0978 |
| Frequencies -- | 298.5116   | 302.0057 | 303.1064 |
| Frequencies -- | 304.4005   | 304.6231 | 309.7709 |
| Frequencies -- | 317.1246   | 322.8123 | 324.0227 |
| Frequencies -- | 326.9382   | 331.3311 | 337.2896 |
| Frequencies -- | 357.2864   | 368.0812 | 374.3968 |
| Frequencies -- | 376.9216   | 378.5207 | 381.1524 |
| Frequencies -- | 385.6424   | 388.6834 | 397.3242 |
| Frequencies -- | 413.8233   | 422.8216 | 431.9464 |
| Frequencies -- | 432.6859   | 434.2628 | 434.5504 |
| Frequencies -- | 449.3758   | 457.0787 | 460.3364 |
| Frequencies -- | 464.2704   | 477.7378 | 530.1705 |
| Frequencies -- | 532.5994   | 534.4996 | 538.2557 |
| Frequencies -- | 539.3493   | 545.1210 | 552.4892 |
| Frequencies -- | 555.1604   | 565.0266 | 576.4809 |
| Frequencies -- | 584.2830   | 593.4530 | 596.1759 |
| Frequencies -- | 605.4990   | 609.1698 | 612.3847 |
| Frequencies -- | 619.5390   | 623.8070 | 634.3806 |
| Frequencies -- | 636.1990   | 638.2333 | 642.0504 |

|                |           |           |           |
|----------------|-----------|-----------|-----------|
| Frequencies -- | 655.2621  | 672.2109  | 701.5930  |
| Frequencies -- | 715.7401  | 721.8441  | 732.8835  |
| Frequencies -- | 743.5252  | 746.5828  | 760.6997  |
| Frequencies -- | 768.9108  | 769.4925  | 777.0693  |
| Frequencies -- | 800.9584  | 804.2151  | 807.1617  |
| Frequencies -- | 841.4362  | 868.9650  | 877.4078  |
| Frequencies -- | 878.3753  | 881.2308  | 895.3218  |
| Frequencies -- | 904.3365  | 904.5992  | 912.9496  |
| Frequencies -- | 917.6023  | 924.8327  | 927.7750  |
| Frequencies -- | 933.8136  | 945.0741  | 963.0568  |
| Frequencies -- | 966.0081  | 968.4364  | 971.2228  |
| Frequencies -- | 1009.3275 | 1019.4151 | 1027.6133 |
| Frequencies -- | 1039.7975 | 1040.8402 | 1042.6778 |
| Frequencies -- | 1044.6988 | 1046.5596 | 1048.3588 |
| Frequencies -- | 1050.2901 | 1054.0581 | 1056.5626 |
| Frequencies -- | 1070.4293 | 1084.9226 | 1086.1488 |
| Frequencies -- | 1088.6864 | 1092.6431 | 1111.4187 |
| Frequencies -- | 1114.8503 | 1124.3370 | 1125.7996 |
| Frequencies -- | 1170.2901 | 1172.3056 | 1174.3116 |
| Frequencies -- | 1186.4656 | 1187.6998 | 1209.9787 |
| Frequencies -- | 1212.8677 | 1215.3931 | 1256.6305 |
| Frequencies -- | 1263.4919 | 1266.1387 | 1286.9861 |
| Frequencies -- | 1298.8592 | 1313.9321 | 1318.3586 |
| Frequencies -- | 1319.5537 | 1321.1598 | 1325.8452 |
| Frequencies -- | 1331.1039 | 1337.3052 | 1343.7923 |
| Frequencies -- | 1349.4454 | 1352.6849 | 1369.9333 |
| Frequencies -- | 1401.0131 | 1404.6328 | 1409.4200 |
| Frequencies -- | 1411.2656 | 1413.7360 | 1418.6934 |
| Frequencies -- | 1419.8895 | 1420.8629 | 1422.5250 |
| Frequencies -- | 1423.6857 | 1424.4378 | 1425.7394 |
| Frequencies -- | 1427.9576 | 1429.1099 | 1434.2043 |
| Frequencies -- | 1435.5388 | 1449.6568 | 1453.4596 |
| Frequencies -- | 1467.1842 | 1468.0639 | 1469.4798 |
| Frequencies -- | 1471.9525 | 1475.3795 | 1483.1627 |
| Frequencies -- | 1486.3849 | 1487.0573 | 1489.5490 |
| Frequencies -- | 1489.9230 | 1491.1304 | 1495.9486 |
| Frequencies -- | 1498.6648 | 1500.8614 | 1502.8873 |
| Frequencies -- | 1503.2049 | 1506.0262 | 1507.7069 |
| Frequencies -- | 1509.0248 | 1509.7397 | 1511.8652 |
| Frequencies -- | 1517.2736 | 1524.7164 | 1529.0155 |
| Frequencies -- | 1576.7393 | 1586.7697 | 1594.4977 |
| Frequencies -- | 1596.4463 | 1598.6328 | 1617.8982 |
| Frequencies -- | 1620.2342 | 1622.7126 | 1808.0397 |
| Frequencies -- | 2952.5080 | 3009.9167 | 3010.5550 |
| Frequencies -- | 3011.2772 | 3012.6845 | 3012.8857 |
| Frequencies -- | 3013.7739 | 3014.8690 | 3015.2223 |
| Frequencies -- | 3024.9667 | 3052.8921 | 3078.6863 |
| Frequencies -- | 3090.4494 | 3095.3849 | 3098.5371 |
| Frequencies -- | 3098.6052 | 3100.9053 | 3103.2938 |
| Frequencies -- | 3107.4905 | 3109.6548 | 3114.8306 |
| Frequencies -- | 3115.9959 | 3120.9978 | 3126.0609 |
| Frequencies -- | 3130.8076 | 3136.7000 | 3140.5732 |
| Frequencies -- | 3145.9235 | 3152.6789 | 3155.2647 |
| Frequencies -- | 3157.8639 | 3164.3986 | 3171.5412 |
| Frequencies -- | 3198.4011 | 3214.2148 | 3216.4392 |

**Catalyst 33:**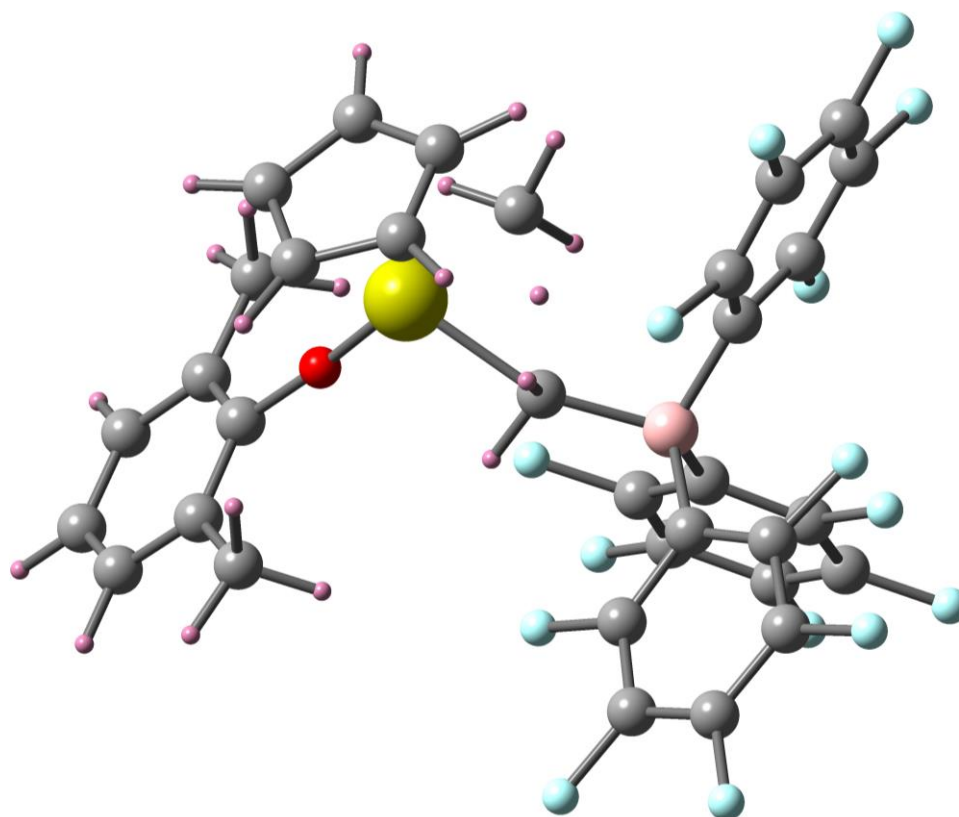

| <b>vacuum</b> | <b>toluene-like solvent</b> | <b>D3 dispersion</b> |
|---------------|-----------------------------|----------------------|
| -2924.473904  | -2924.4857874               | -0.49703962          |

Imaginary frequency corresponding to vibration along the reaction coordinate:  $-1095 \text{ cm}^{-1}$ .

|    |             |             |             |
|----|-------------|-------------|-------------|
| Ti | -2.13115400 | 1.74012500  | 0.41519200  |
| C  | -1.41085300 | 2.03720400  | -1.77590300 |
| H  | -1.04668300 | 1.28595700  | -2.49088800 |
| H  | -2.46141100 | 2.22807800  | -2.03497600 |
| H  | -0.82906300 | 2.95667500  | -1.89118500 |
| O  | -3.53140300 | 0.67964500  | 0.19535200  |
| C  | -4.70754000 | -0.07141500 | 0.21588900  |
| C  | -4.96329200 | -0.91644500 | 1.33584900  |
| C  | -5.59669600 | 0.02951600  | -0.89351000 |
| C  | -6.16592900 | -1.66027200 | 1.32634800  |
| C  | -6.78238200 | -0.73898200 | -0.85022000 |
| C  | -7.07021000 | -1.57466200 | 0.24820400  |
| H  | -6.38703700 | -2.31681800 | 2.16971000  |
| H  | -7.47895700 | -0.68493200 | -1.68877200 |
| H  | -7.99067700 | -2.16120600 | 0.26085800  |
| H  | -3.12960100 | 2.55948100  | 3.19792600  |
| C  | -2.70190600 | 3.03630300  | 2.32010300  |
| C  | -1.30352600 | 3.33334000  | 2.11375000  |
| C  | -3.43932900 | 3.57321300  | 1.20915100  |
| H  | -0.48967000 | 3.08074700  | 2.78681500  |
| C  | -1.17605400 | 4.00104600  | 0.86105400  |
| H  | -4.51680900 | 3.52735500  | 1.07871000  |

|   |             |             |             |
|---|-------------|-------------|-------------|
| C | -2.49418400 | 4.13762700  | 0.28993200  |
| H | -0.24821900 | 4.33974700  | 0.41115500  |
| H | -2.73209000 | 4.62719300  | -0.64970900 |
| F | 0.70351100  | -4.57787900 | -4.01253800 |
| C | 0.75687700  | -3.53437600 | -3.10035800 |
| C | 1.98574500  | -3.11159800 | -2.56442500 |
| C | -0.41389400 | -2.87550000 | -2.69674600 |
| C | 2.00737000  | -2.04989500 | -1.64298300 |
| F | 3.16156800  | -3.73983500 | -2.95538200 |
| C | -0.33183700 | -1.81573400 | -1.77041200 |
| F | -1.64478300 | -3.26915200 | -3.21397800 |
| C | 0.86482500  | -1.34187900 | -1.19354900 |
| F | 3.27210300  | -1.67465900 | -1.17911400 |
| F | -1.57198300 | -1.22801600 | -1.44938900 |
| B | 1.02315600  | -0.14861000 | -0.03596000 |
| C | 1.68507400  | -0.95300900 | 1.28841400  |
| C | 1.92161500  | 1.16421200  | -0.53738700 |
| C | -0.43800500 | 0.51575800  | 0.47713100  |
| C | 3.01605300  | -0.84491000 | 1.76166300  |
| C | 0.91945700  | -1.89496400 | 2.01661100  |
| C | 2.29458300  | 1.45449600  | -1.86946000 |
| C | 2.30840500  | 2.17761100  | 0.37145600  |
| H | -1.15090800 | -0.30064800 | 0.68189000  |
| H | -0.18912500 | 1.09116000  | 1.39315400  |
| H | -0.84352600 | 1.31387300  | -0.77548700 |
| C | 3.52807700  | -1.56176400 | 2.86333100  |
| F | 3.93817200  | -0.00631700 | 1.13277700  |
| C | 1.38032200  | -2.63521500 | 3.12098400  |
| F | -0.40844000 | -2.17568000 | 1.63002200  |
| C | 3.02875800  | 2.59407100  | -2.26295400 |
| F | 1.91296300  | 0.61224000  | -2.92305600 |
| C | 3.03393800  | 3.33308500  | 0.03678300  |
| F | 1.95686600  | 2.06215000  | 1.73099200  |
| C | 2.70361100  | -2.46182700 | 3.55726800  |
| F | 4.84626100  | -1.38891200 | 3.26726500  |
| F | 0.54312800  | -3.53278100 | 3.77710100  |
| C | 3.41243100  | 3.54139300  | -1.30095400 |
| F | 3.35834900  | 2.79659300  | -3.59789100 |
| F | 3.37157200  | 4.27102800  | 1.00788300  |
| F | 3.18760100  | -3.17240700 | 4.64579000  |
| F | 4.12679300  | 4.67316500  | -1.66506500 |
| C | -3.98634900 | -1.04188000 | 2.49151800  |
| H | -3.04282300 | -1.51073800 | 2.17371300  |
| H | -3.73873300 | -0.06265000 | 2.93059500  |
| H | -4.40900300 | -1.66432500 | 3.29140500  |
| C | -5.27978000 | 0.90245500  | -2.09427600 |
| H | -5.12345500 | 1.95490200  | -1.80736900 |
| H | -4.36662700 | 0.55623200  | -2.60338400 |
| H | -6.10011500 | 0.87519400  | -2.82399200 |

|                |            |          |          |
|----------------|------------|----------|----------|
| Frequencies -- | -1094.9368 | 13.4301  | 18.5642  |
| Frequencies -- | 21.4827    | 28.1728  | 29.2242  |
| Frequencies -- | 30.9053    | 35.4322  | 39.6189  |
| Frequencies -- | 43.4234    | 45.3667  | 47.1683  |
| Frequencies -- | 51.0986    | 74.4668  | 82.6052  |
| Frequencies -- | 94.4022    | 102.4578 | 112.0207 |
| Frequencies -- | 112.5445   | 122.5061 | 125.6920 |

|                |           |           |           |
|----------------|-----------|-----------|-----------|
| Frequencies -- | 132.1604  | 136.8420  | 141.8430  |
| Frequencies -- | 144.0049  | 147.2384  | 150.7655  |
| Frequencies -- | 153.7205  | 156.8534  | 158.5993  |
| Frequencies -- | 161.7950  | 164.9665  | 173.0044  |
| Frequencies -- | 207.1413  | 210.0765  | 214.5094  |
| Frequencies -- | 216.7771  | 219.9798  | 221.4749  |
| Frequencies -- | 224.3997  | 225.8725  | 246.5573  |
| Frequencies -- | 261.9205  | 264.3937  | 264.9516  |
| Frequencies -- | 265.4401  | 267.9252  | 275.0482  |
| Frequencies -- | 275.9546  | 282.0614  | 302.3234  |
| Frequencies -- | 302.9652  | 308.5436  | 313.6673  |
| Frequencies -- | 324.1449  | 326.2212  | 330.7876  |
| Frequencies -- | 336.2487  | 345.9095  | 362.2397  |
| Frequencies -- | 366.0512  | 376.5136  | 378.8352  |
| Frequencies -- | 379.5489  | 381.6068  | 389.7675  |
| Frequencies -- | 399.4250  | 431.0164  | 431.8691  |
| Frequencies -- | 432.8530  | 450.5758  | 456.4220  |
| Frequencies -- | 463.6039  | 481.3605  | 492.9342  |
| Frequencies -- | 511.3331  | 535.4021  | 536.8912  |
| Frequencies -- | 543.9073  | 545.9740  | 551.1795  |
| Frequencies -- | 554.4649  | 564.2700  | 567.3621  |
| Frequencies -- | 570.7831  | 573.6118  | 597.3084  |
| Frequencies -- | 605.1460  | 635.4072  | 636.1147  |
| Frequencies -- | 637.7677  | 642.3754  | 654.9439  |
| Frequencies -- | 674.5047  | 707.4322  | 718.1875  |
| Frequencies -- | 725.4696  | 734.5460  | 735.9167  |
| Frequencies -- | 743.7945  | 748.1933  | 749.6025  |
| Frequencies -- | 762.2522  | 773.1977  | 787.5876  |
| Frequencies -- | 789.6579  | 802.7925  | 813.9772  |
| Frequencies -- | 839.7462  | 842.1499  | 847.5391  |
| Frequencies -- | 871.3991  | 873.6529  | 877.6201  |
| Frequencies -- | 887.1454  | 901.3424  | 901.8324  |
| Frequencies -- | 911.3953  | 911.9942  | 920.8350  |
| Frequencies -- | 922.8369  | 936.4168  | 990.5973  |
| Frequencies -- | 994.3959  | 1003.1426 | 1018.4447 |
| Frequencies -- | 1023.1791 | 1028.5309 | 1034.8593 |
| Frequencies -- | 1036.0489 | 1050.5571 | 1051.1072 |
| Frequencies -- | 1052.2061 | 1056.1290 | 1056.4982 |
| Frequencies -- | 1060.6580 | 1087.5484 | 1090.6766 |
| Frequencies -- | 1092.3426 | 1109.0736 | 1126.9746 |
| Frequencies -- | 1194.0345 | 1201.3199 | 1211.2964 |
| Frequencies -- | 1214.3323 | 1216.4921 | 1268.4015 |
| Frequencies -- | 1279.3670 | 1282.2118 | 1282.6940 |
| Frequencies -- | 1290.4667 | 1318.1097 | 1320.1037 |
| Frequencies -- | 1324.4162 | 1337.9249 | 1338.3291 |
| Frequencies -- | 1344.4592 | 1349.4429 | 1363.6979 |
| Frequencies -- | 1389.9969 | 1392.8583 | 1411.5551 |
| Frequencies -- | 1419.9002 | 1420.4361 | 1422.5984 |
| Frequencies -- | 1423.8457 | 1427.9227 | 1438.0068 |
| Frequencies -- | 1454.3141 | 1465.2382 | 1467.8095 |
| Frequencies -- | 1468.9348 | 1471.4209 | 1473.3734 |
| Frequencies -- | 1487.2149 | 1490.9386 | 1493.8327 |
| Frequencies -- | 1506.6922 | 1506.9555 | 1593.9054 |
| Frequencies -- | 1595.9425 | 1597.3679 | 1605.6870 |
| Frequencies -- | 1607.4351 | 1617.6051 | 1619.8591 |
| Frequencies -- | 1622.1987 | 1820.0761 | 2960.0864 |
| Frequencies -- | 3010.6198 | 3020.6590 | 3041.9346 |
| Frequencies -- | 3086.4996 | 3095.5742 | 3106.9489 |
| Frequencies -- | 3132.5733 | 3135.8426 | 3142.4800 |
| Frequencies -- | 3166.3995 | 3177.3601 | 3190.2340 |
| Frequencies -- | 3197.4113 | 3235.8035 | 3242.4453 |
| Frequencies -- | 3255.9521 | 3258.2270 | 3277.5243 |



## 5. Transition States for Transfer of (C<sub>6</sub>F<sub>5</sub>) from Counterion to Cation ([return to table of contents](#))

### Catalyst 1:

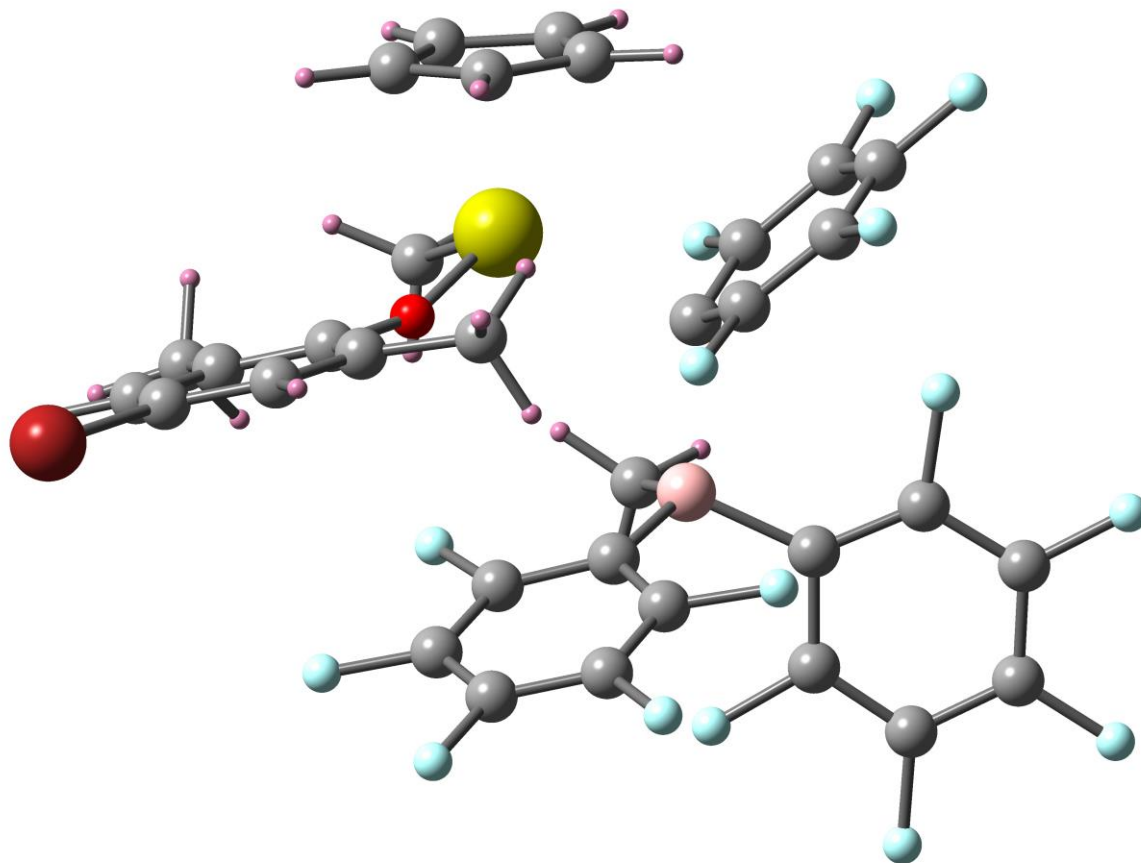

| vacuum        | toluene-like solvent | D3 dispersion |
|---------------|----------------------|---------------|
| -2937.0260475 | -2937.036449         | -0.51564851   |

Imaginary frequency corresponding to vibration along the reaction coordinate:  $-199\text{ cm}^{-1}$ .

|    |             |             |             |
|----|-------------|-------------|-------------|
| Ti | 0.79028500  | 2.21430500  | 0.90507100  |
| C  | 0.75143500  | 2.10262700  | 2.97811400  |
| H  | 0.67565000  | 1.01726300  | 3.13885600  |
| H  | 1.61794800  | 2.48666800  | 3.52913900  |
| H  | -0.16018100 | 2.61259200  | 3.32747100  |
| O  | 2.07792300  | 1.03744500  | 0.54249700  |
| C  | 3.33303800  | 0.51899400  | 0.20342800  |
| C  | 3.64751700  | 0.25469900  | -1.16486400 |
| C  | 4.26342700  | 0.24491500  | 1.25419000  |
| C  | 4.93178600  | -0.25761400 | -1.46574600 |
| C  | 5.53222000  | -0.27160700 | 0.90636600  |
| C  | 5.85923200  | -0.51048300 | -0.44049600 |
| H  | 5.18869100  | -0.46417800 | -2.50403000 |
| H  | 6.25076500  | -0.48973800 | 1.69529900  |
| H  | -0.23955300 | 4.23381100  | -1.34807700 |

|    |             |             |             |
|----|-------------|-------------|-------------|
| C  | 0.43272900  | 4.21339100  | -0.49932000 |
| C  | 0.11976800  | 4.61417700  | 0.84448400  |
| C  | 1.81616700  | 3.84435500  | -0.54551800 |
| H  | -0.83934200 | 4.97168800  | 1.20480900  |
| C  | 1.30975200  | 4.48883800  | 1.62932700  |
| H  | 2.36450900  | 3.52118700  | -1.42317400 |
| C  | 2.35901900  | 4.00200000  | 0.77394600  |
| H  | 1.40533100  | 4.73706500  | 2.67971500  |
| H  | 3.38591300  | 3.80455800  | 1.06628300  |
| F  | -7.18091000 | -3.12883500 | -0.24126400 |
| C  | -5.96559200 | -2.50465500 | -0.00531000 |
| C  | -5.71629200 | -1.21121400 | -0.48624300 |
| C  | -4.95454000 | -3.15261700 | 0.72402800  |
| C  | -4.47216500 | -0.59846400 | -0.22982900 |
| F  | -6.69293400 | -0.54243100 | -1.21478700 |
| C  | -3.73318900 | -2.49259700 | 0.94961700  |
| F  | -5.16921200 | -4.43443400 | 1.21463300  |
| C  | -3.41414400 | -1.18632100 | 0.48930200  |
| F  | -4.33600900 | 0.68696500  | -0.77455900 |
| F  | -2.78821000 | -3.22430300 | 1.68702300  |
| B  | -1.94363200 | -0.58634000 | 1.00260500  |
| C  | -1.50207600 | 1.34329600  | 0.14797600  |
| C  | -2.36062800 | 2.38082800  | 0.61699200  |
| C  | -1.38934200 | 1.35129300  | -1.27284700 |
| C  | -3.07393200 | 3.27690500  | -0.19712600 |
| F  | -2.52197100 | 2.57930300  | 1.99555100  |
| C  | -2.09031400 | 2.20284600  | -2.14411400 |
| F  | -0.49180000 | 0.47566100  | -1.89190800 |
| C  | -2.94937800 | 3.17307800  | -1.59493000 |
| F  | -3.87504900 | 4.27276500  | 0.34727200  |
| F  | -1.92834500 | 2.13184600  | -3.52124100 |
| F  | -3.63505400 | 4.04008500  | -2.42025200 |
| C  | 2.66026400  | 0.44140400  | -2.30249400 |
| H  | 1.96275800  | -0.40748800 | -2.35671200 |
| H  | 2.04686500  | 1.34107200  | -2.19370500 |
| H  | 3.18513000  | 0.49819900  | -3.26580700 |
| C  | 3.93659800  | 0.47344400  | 2.71840400  |
| H  | 3.80171300  | 1.54249300  | 2.94225900  |
| H  | 3.01297200  | -0.04365700 | 3.00826100  |
| H  | 4.74789800  | 0.10043300  | 3.35714200  |
| C  | -0.73432800 | -1.56159900 | 0.47966100  |
| C  | 0.37960600  | -1.92783100 | 1.26957900  |
| C  | -0.78318900 | -2.24991500 | -0.76071200 |
| C  | 1.35938900  | -2.86423700 | 0.88883600  |
| C  | 0.16948300  | -3.19289000 | -1.18890200 |
| C  | 1.25435100  | -3.50910000 | -0.35342800 |
| F  | -1.82858500 | -2.01111700 | -1.65780900 |
| F  | 0.05019500  | -3.81370800 | -2.42654300 |
| F  | 2.20965000  | -4.42911200 | -0.75493800 |
| F  | 2.43173600  | -3.14789500 | 1.72836300  |
| F  | 0.58481300  | -1.34517900 | 2.52871100  |
| C  | -2.11018900 | -0.29691800 | 2.58392500  |
| H  | -1.30653300 | 0.27216800  | 3.05107200  |
| H  | -3.05537600 | 0.22533900  | 2.78702200  |
| H  | -2.16008700 | -1.26646900 | 3.10542100  |
| Br | 7.63342000  | -1.21703500 | -0.89393900 |

|                |           |           |           |
|----------------|-----------|-----------|-----------|
| Frequencies -- | -199.0619 | 10.7760   | 12.3254   |
| Frequencies -- | 18.5417   | 26.2158   | 31.2325   |
| Frequencies -- | 33.6777   | 35.8895   | 39.8789   |
| Frequencies -- | 47.9418   | 49.9739   | 54.4847   |
| Frequencies -- | 58.8780   | 62.9526   | 71.6113   |
| Frequencies -- | 85.5378   | 88.0390   | 93.6179   |
| Frequencies -- | 100.3881  | 109.9931  | 114.5517  |
| Frequencies -- | 119.1958  | 120.7337  | 126.0016  |
| Frequencies -- | 134.5669  | 136.4691  | 143.1160  |
| Frequencies -- | 150.9991  | 156.7145  | 157.5032  |
| Frequencies -- | 165.1800  | 173.9959  | 174.7729  |
| Frequencies -- | 188.4902  | 195.0366  | 200.3604  |
| Frequencies -- | 205.9132  | 218.6839  | 221.5458  |
| Frequencies -- | 230.1899  | 234.1825  | 241.5210  |
| Frequencies -- | 243.6162  | 250.7969  | 254.9239  |
| Frequencies -- | 264.1906  | 265.4932  | 266.8470  |
| Frequencies -- | 270.3158  | 271.4384  | 272.7289  |
| Frequencies -- | 274.6629  | 277.2513  | 285.7934  |
| Frequencies -- | 296.0358  | 301.6441  | 305.2137  |
| Frequencies -- | 309.6386  | 318.8212  | 319.2960  |
| Frequencies -- | 328.7309  | 330.3155  | 333.5853  |
| Frequencies -- | 364.0411  | 373.2054  | 376.0429  |
| Frequencies -- | 380.5670  | 402.6786  | 408.0855  |
| Frequencies -- | 424.1563  | 426.0817  | 431.6973  |
| Frequencies -- | 433.9180  | 436.8485  | 442.7092  |
| Frequencies -- | 451.7227  | 454.9963  | 486.1741  |
| Frequencies -- | 501.9490  | 505.3863  | 512.8458  |
| Frequencies -- | 540.0501  | 545.0627  | 551.2137  |
| Frequencies -- | 560.1624  | 561.1921  | 567.5687  |
| Frequencies -- | 570.4534  | 573.3307  | 576.0000  |
| Frequencies -- | 594.2887  | 629.3764  | 631.0534  |
| Frequencies -- | 638.8027  | 642.3016  | 644.2907  |
| Frequencies -- | 649.2514  | 677.4463  | 695.1268  |
| Frequencies -- | 703.3435  | 716.4633  | 718.0544  |
| Frequencies -- | 722.3332  | 728.3659  | 739.6311  |
| Frequencies -- | 752.4673  | 783.2714  | 793.4739  |
| Frequencies -- | 803.8983  | 807.9691  | 819.1307  |
| Frequencies -- | 830.7732  | 842.2536  | 843.2475  |
| Frequencies -- | 874.2314  | 886.1498  | 889.4831  |
| Frequencies -- | 895.9084  | 899.5275  | 908.1028  |
| Frequencies -- | 911.0177  | 918.4531  | 919.9114  |
| Frequencies -- | 950.8940  | 987.9775  | 994.4410  |
| Frequencies -- | 996.7215  | 1012.2288 | 1029.8366 |
| Frequencies -- | 1037.2192 | 1042.8000 | 1044.6594 |
| Frequencies -- | 1050.3273 | 1055.1242 | 1056.9145 |
| Frequencies -- | 1059.5662 | 1061.7746 | 1082.7664 |
| Frequencies -- | 1091.3390 | 1094.8253 | 1124.8801 |
| Frequencies -- | 1132.7888 | 1181.2695 | 1186.9342 |
| Frequencies -- | 1198.4178 | 1215.0351 | 1222.7287 |
| Frequencies -- | 1251.7801 | 1266.1012 | 1283.6571 |
| Frequencies -- | 1286.9982 | 1311.8366 | 1326.2773 |
| Frequencies -- | 1332.7419 | 1340.7377 | 1351.2178 |
| Frequencies -- | 1356.8739 | 1369.9313 | 1379.1491 |
| Frequencies -- | 1395.6644 | 1401.3884 | 1413.6084 |
| Frequencies -- | 1415.8846 | 1420.3242 | 1422.4748 |
| Frequencies -- | 1426.2768 | 1429.2725 | 1431.8324 |
| Frequencies -- | 1447.2579 | 1449.2641 | 1451.7491 |
| Frequencies -- | 1455.9784 | 1470.6213 | 1473.7115 |
| Frequencies -- | 1489.7202 | 1491.6744 | 1497.3988 |
| Frequencies -- | 1502.2411 | 1503.4790 | 1508.5423 |
| Frequencies -- | 1570.8352 | 1583.4564 | 1583.6489 |
| Frequencies -- | 1589.2965 | 1595.2902 | 1597.4194 |

|                |           |           |           |
|----------------|-----------|-----------|-----------|
| Frequencies -- | 1619.2024 | 1623.2178 | 3012.3550 |
| Frequencies -- | 3031.4644 | 3035.2059 | 3042.2397 |
| Frequencies -- | 3117.6156 | 3122.6308 | 3128.1894 |
| Frequencies -- | 3140.7687 | 3150.1268 | 3160.5125 |
| Frequencies -- | 3166.9953 | 3201.4358 | 3203.7638 |
| Frequencies -- | 3213.5813 | 3249.4235 | 3255.4742 |
| Frequencies -- | 3270.7647 | 3279.5911 | 3294.9892 |

**Catalyst 2:**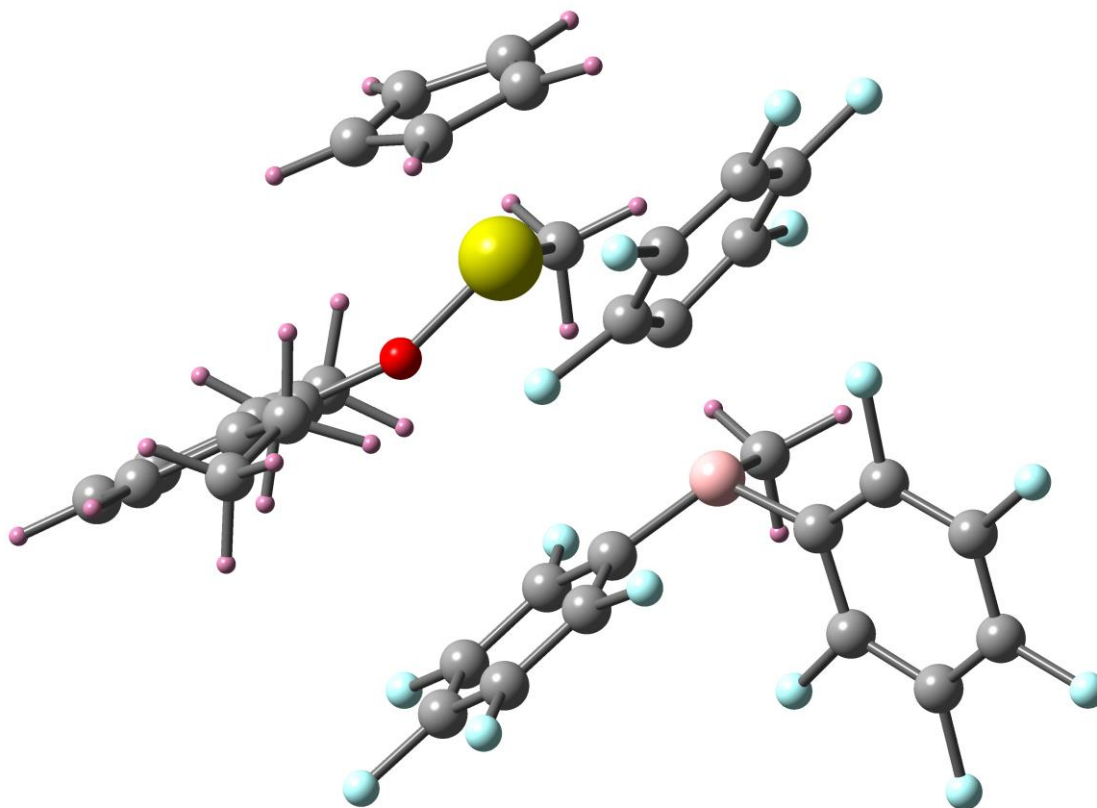

| <b>vacuum</b> | <b>toluene-like solvent</b> | <b>D3 dispersion</b> |
|---------------|-----------------------------|----------------------|
| -3003.0411458 | -3003.0512844               | -0.54423054          |

Imaginary frequency corresponding to vibration along the reaction coordinate:  $-202\text{ cm}^{-1}$ .

|    |             |             |             |
|----|-------------|-------------|-------------|
| Ti | -1.66744500 | 1.86710000  | -0.64591400 |
| C  | -1.77054100 | 1.88270700  | -2.72068400 |
| H  | -1.62406300 | 0.82546000  | -2.98546000 |
| H  | -2.68225600 | 2.25746500  | -3.19911100 |
| H  | -0.91221500 | 2.48437600  | -3.05994100 |
| O  | -2.70899700 | 0.47389000  | -0.26601800 |
| C  | -3.83976100 | -0.25755400 | 0.13844800  |
| C  | -3.99930400 | -0.58512500 | 1.52247800  |
| C  | -4.77722400 | -0.66195200 | -0.86497400 |
| C  | -5.14856100 | -1.32637900 | 1.88235100  |
| C  | -5.90514000 | -1.39794800 | -0.43677100 |
| C  | -6.09430600 | -1.72512900 | 0.91931900  |
| H  | -5.30075500 | -1.60432000 | 2.92348200  |
| H  | -6.63766700 | -1.72913400 | -1.17007400 |
| C  | -1.25910600 | 4.16221800  | 0.17911100  |
| C  | -1.99085100 | 4.31407600  | -1.03773500 |
| C  | -2.08277700 | 3.43609000  | 1.11126100  |
| C  | -3.27353900 | 3.69033000  | -0.86313000 |
| C  | -3.33817400 | 3.16693700  | 0.47077500  |

|   |             |             |             |
|---|-------------|-------------|-------------|
| F | 7.03782700  | -2.30676800 | -0.26947600 |
| C | 5.73605600  | -1.84690300 | -0.39773400 |
| C | 5.38445900  | -0.55619300 | 0.02291400  |
| C | 4.73696200  | -2.66275800 | -0.95444200 |
| C | 4.05323900  | -0.11277900 | -0.12007300 |
| F | 6.34698500  | 0.27656900  | 0.58171900  |
| C | 3.42575100  | -2.16758400 | -1.07331900 |
| F | 5.05126600  | -3.94715500 | -1.38098700 |
| C | 3.00109000  | -0.87399500 | -0.66450100 |
| F | 3.82320000  | 1.18841300  | 0.34952600  |
| F | 2.50291500  | -3.06136700 | -1.64041500 |
| B | 1.41614500  | -0.49161400 | -1.02647900 |
| C | 0.84532000  | 1.43860000  | -0.24905300 |
| C | 1.51053900  | 2.51411400  | -0.91156600 |
| C | 0.89462700  | 1.58066800  | 1.16694300  |
| C | 2.21388000  | 3.54944900  | -0.27171800 |
| F | 1.48450700  | 2.60197600  | -2.30877500 |
| C | 1.57694100  | 2.58903900  | 1.86887500  |
| F | 0.18039300  | 0.67860500  | 1.96801200  |
| C | 2.25878600  | 3.57691600  | 1.13507700  |
| F | 2.84411800  | 4.55439400  | -0.99414100 |
| F | 1.56695000  | 2.64725800  | 3.25637700  |
| F | 2.93444000  | 4.58658800  | 1.78922900  |
| C | -2.96387500 | -0.15731900 | 2.56281900  |
| H | -3.02373600 | 0.93684000  | 2.69491400  |
| C | -4.55220900 | -0.31501100 | -2.33613800 |
| H | -3.55096100 | -0.66657100 | -2.62455400 |
| C | 0.41763500  | -1.56920000 | -0.30051100 |
| C | -0.68731000 | -2.17091200 | -0.94637800 |
| C | 0.68735400  | -2.12889600 | 0.97510300  |
| C | -1.45741000 | -3.21769800 | -0.40511900 |
| C | -0.05935300 | -3.16483000 | 1.56604100  |
| C | -1.14239700 | -3.72243400 | 0.86591500  |
| F | 1.76088000  | -1.65746100 | 1.73707500  |
| F | 0.26170600  | -3.64288700 | 2.83131400  |
| F | -1.89723900 | -4.73978200 | 1.42925000  |
| F | -2.52953200 | -3.74850700 | -1.11389900 |
| F | -1.09713900 | -1.73465400 | -2.21296900 |
| C | 1.34939200  | -0.30945800 | -2.63109800 |
| H | 0.42355600  | 0.11624400  | -3.02082700 |
| H | 2.18343400  | 0.30800700  | -2.99126800 |
| H | 1.46265100  | -1.30303000 | -3.09392400 |
| H | -6.97073700 | -2.30077800 | 1.22344300  |
| C | -3.06436700 | -0.81435400 | 3.95807000  |
| H | -3.99391500 | -0.54607100 | 4.48356900  |
| H | -3.00733400 | -1.91217200 | 3.89806700  |
| H | -2.22357000 | -0.47233500 | 4.58127000  |
| C | -5.57752400 | -0.87167600 | -3.34750000 |
| H | -5.28924000 | -0.56369600 | -4.36487600 |
| H | -5.60994300 | -1.97196100 | -3.33296600 |
| H | -6.59562500 | -0.49341900 | -3.16350000 |
| H | -0.27641900 | 4.56668400  | 0.37919900  |
| H | -1.63660900 | 4.80177700  | -1.94047900 |
| H | -1.81953400 | 3.17856300  | 2.13224200  |
| H | -4.06347800 | 3.63683500  | -1.60517100 |
| H | -4.18141400 | 2.64223700  | 0.90674600  |
| H | -4.52422600 | 0.78254200  | -2.43658900 |

| H              | -1.96220000 | -0.35012700 | 2.16154500 |
|----------------|-------------|-------------|------------|
| Frequencies -- | -201.5606   | 11.1817     | 20.9672    |
| Frequencies -- | 26.8854     | 28.6098     | 33.4701    |
| Frequencies -- | 35.2478     | 38.3413     | 39.4490    |
| Frequencies -- | 42.8379     | 46.0397     | 54.1332    |
| Frequencies -- | 57.3626     | 61.9299     | 69.1695    |
| Frequencies -- | 74.6768     | 82.2943     | 91.0172    |
| Frequencies -- | 96.3942     | 99.0520     | 110.6002   |
| Frequencies -- | 113.9381    | 118.7590    | 120.2703   |
| Frequencies -- | 125.2834    | 131.1310    | 135.4624   |
| Frequencies -- | 142.9197    | 151.4111    | 156.7419   |
| Frequencies -- | 162.3884    | 166.5986    | 185.1220   |
| Frequencies -- | 186.5762    | 200.4607    | 202.9612   |
| Frequencies -- | 212.8694    | 222.2047    | 224.1399   |
| Frequencies -- | 226.4001    | 232.4790    | 240.0393   |
| Frequencies -- | 242.5394    | 261.1842    | 264.5370   |
| Frequencies -- | 265.3198    | 266.8911    | 270.2452   |
| Frequencies -- | 271.2890    | 276.2987    | 277.0097   |
| Frequencies -- | 279.9689    | 284.0418    | 297.3556   |
| Frequencies -- | 298.6153    | 304.1899    | 305.0092   |
| Frequencies -- | 309.5898    | 319.5842    | 320.0487   |
| Frequencies -- | 323.8630    | 326.0288    | 332.2073   |
| Frequencies -- | 333.9176    | 342.2018    | 372.2410   |
| Frequencies -- | 373.5204    | 375.9387    | 381.8972   |
| Frequencies -- | 400.6840    | 408.9594    | 423.8219   |
| Frequencies -- | 426.7109    | 431.4878    | 433.6723   |
| Frequencies -- | 442.8225    | 451.1806    | 455.0528   |
| Frequencies -- | 486.5104    | 499.0979    | 508.5394   |
| Frequencies -- | 532.3340    | 540.9545    | 545.0210   |
| Frequencies -- | 547.3199    | 551.2898    | 565.1154   |
| Frequencies -- | 573.1868    | 576.2652    | 577.4349   |
| Frequencies -- | 595.0700    | 602.1896    | 627.0398   |
| Frequencies -- | 629.0043    | 638.2016    | 642.1793   |
| Frequencies -- | 643.8153    | 650.6366    | 676.5455   |
| Frequencies -- | 683.8589    | 695.0257    | 713.4151   |
| Frequencies -- | 715.8753    | 717.0676    | 721.3826   |
| Frequencies -- | 732.2546    | 737.8336    | 751.0064   |
| Frequencies -- | 773.4196    | 783.1466    | 792.3452   |
| Frequencies -- | 798.9561    | 812.4742    | 819.8079   |
| Frequencies -- | 830.9446    | 832.9179    | 843.0818   |
| Frequencies -- | 846.5506    | 853.9366    | 883.8643   |
| Frequencies -- | 895.7414    | 899.8706    | 902.7596   |
| Frequencies -- | 908.1214    | 919.2202    | 920.4577   |
| Frequencies -- | 924.1993    | 988.3812    | 994.3524   |
| Frequencies -- | 994.5402    | 995.8604    | 996.1481   |
| Frequencies -- | 1026.6113   | 1030.4111   | 1038.6919  |
| Frequencies -- | 1042.2216   | 1043.8556   | 1057.2025  |
| Frequencies -- | 1057.8456   | 1059.5869   | 1082.0520  |
| Frequencies -- | 1090.0126   | 1091.6023   | 1097.4811  |
| Frequencies -- | 1099.4627   | 1104.3029   | 1119.9192  |
| Frequencies -- | 1133.5067   | 1170.0964   | 1181.0874  |
| Frequencies -- | 1190.4939   | 1204.4926   | 1214.8379  |
| Frequencies -- | 1222.3859   | 1250.2618   | 1257.0062  |
| Frequencies -- | 1276.8441   | 1286.9210   | 1295.1396  |
| Frequencies -- | 1298.8161   | 1310.8862   | 1325.4054  |
| Frequencies -- | 1327.3686   | 1329.8895   | 1340.3658  |
| Frequencies -- | 1344.7528   | 1356.2318   | 1370.9700  |
| Frequencies -- | 1378.8375   | 1382.7834   | 1396.7676  |
| Frequencies -- | 1400.9254   | 1414.4136   | 1414.8205  |
| Frequencies -- | 1416.4617   | 1421.2860   | 1430.1777  |
| Frequencies -- | 1431.8412   | 1446.4764   | 1447.3476  |
| Frequencies -- | 1449.4121   | 1452.3627   | 1469.7854  |

|                |           |           |           |
|----------------|-----------|-----------|-----------|
| Frequencies -- | 1471.0555 | 1473.1424 | 1485.3191 |
| Frequencies -- | 1495.7951 | 1496.1486 | 1500.2351 |
| Frequencies -- | 1503.6136 | 1504.4175 | 1507.1251 |
| Frequencies -- | 1507.9990 | 1570.5209 | 1583.1709 |
| Frequencies -- | 1595.7651 | 1597.0692 | 1597.8348 |
| Frequencies -- | 1608.2552 | 1618.7454 | 1622.7207 |
| Frequencies -- | 3012.4456 | 3013.1996 | 3015.1523 |
| Frequencies -- | 3024.5359 | 3030.9653 | 3035.8454 |
| Frequencies -- | 3090.6643 | 3110.0775 | 3114.8317 |
| Frequencies -- | 3119.7285 | 3120.9546 | 3123.0466 |
| Frequencies -- | 3138.0160 | 3138.4972 | 3165.5610 |
| Frequencies -- | 3173.1254 | 3203.0503 | 3209.6151 |
| Frequencies -- | 3218.3951 | 3248.4257 | 3253.0573 |
| Frequencies -- | 3263.5569 | 3277.0311 | 3305.2587 |



**Catalyst 3:**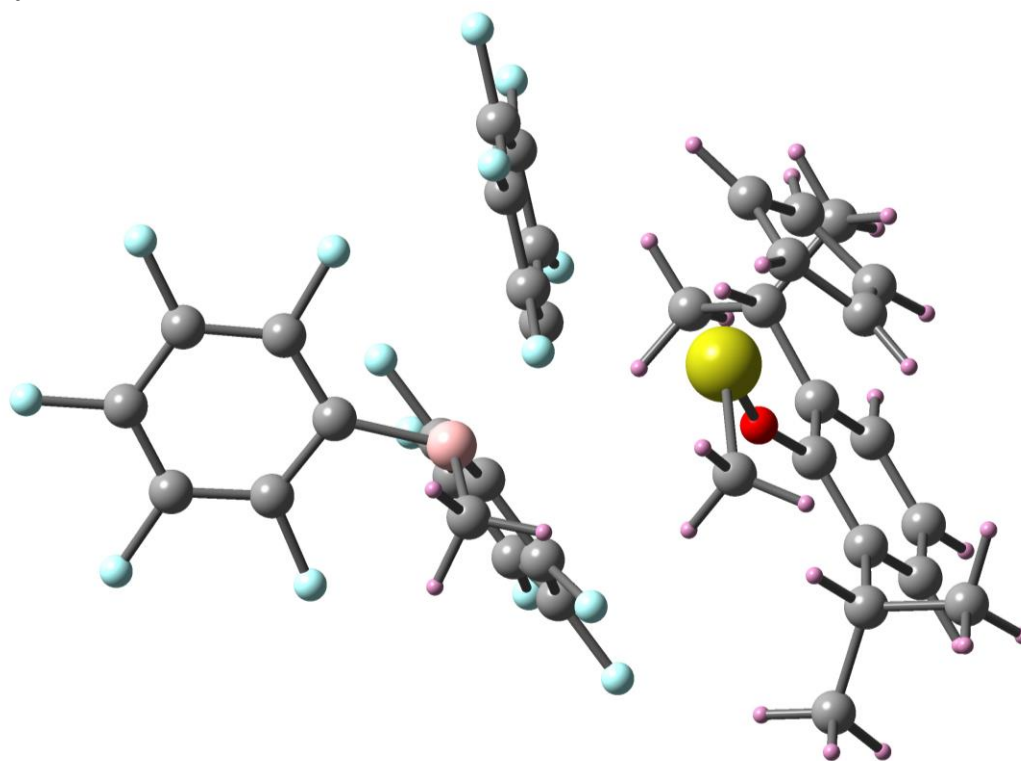

| vacuum        | toluene-like solvent | D3 dispersion |
|---------------|----------------------|---------------|
| -3081.6156898 | -3081.6255412        | -0.58208600   |

Imaginary frequency corresponding to vibration along the reaction coordinate:  $-205 \text{ cm}^{-1}$ .

|    |             |             |             |
|----|-------------|-------------|-------------|
| Ti | -1.64908800 | 1.76616600  | -0.77102600 |
| C  | -1.72499000 | 1.58543800  | -2.83811900 |
| H  | -1.39356100 | 0.54588200  | -2.98501400 |
| H  | -2.69074400 | 1.73575300  | -3.33324000 |
| H  | -0.98759000 | 2.28574300  | -3.25914000 |
| O  | -2.67073200 | 0.39489500  | -0.27446500 |
| C  | -3.77226900 | -0.35662000 | 0.18412900  |
| C  | -3.97099900 | -0.53448000 | 1.59370300  |
| C  | -4.65998500 | -0.93024200 | -0.78646900 |
| C  | -5.08161900 | -1.31148600 | 2.00108600  |
| C  | -5.75226100 | -1.68862100 | -0.30533100 |
| C  | -5.96533300 | -1.88424300 | 1.07032700  |
| H  | -5.25377800 | -1.47017900 | 3.06565600  |
| H  | -6.44072900 | -2.13745100 | -1.02129800 |
| C  | -1.31637800 | 4.06672200  | 0.12202800  |
| C  | -1.71939200 | 4.24861800  | -1.23645800 |
| C  | -2.36897000 | 3.38285600  | 0.81950300  |
| C  | -3.03160000 | 3.68735100  | -1.38502400 |
| C  | -3.44003600 | 3.16012600  | -0.11240000 |
| F  | 7.36625500  | -1.84509200 | -0.28879300 |
| C  | 6.03179100  | -1.48872200 | -0.41045500 |
| C  | 5.58174900  | -0.23065500 | 0.01503900  |
| C  | 5.09681400  | -2.37994400 | -0.96287200 |
| C  | 4.21924600  | 0.10675500  | -0.12126100 |

|   |             |             |             |
|---|-------------|-------------|-------------|
| F | 6.47754500  | 0.67343100  | 0.57389300  |
| C | 3.75037200  | -1.98844600 | -1.07607800 |
| F | 5.50818400  | -3.63624700 | -1.39054300 |
| C | 3.22790300  | -0.73153000 | -0.66587400 |
| F | 3.88714500  | 1.37996100  | 0.36215800  |
| F | 2.89688500  | -2.95429500 | -1.63393300 |
| B | 1.61272700  | -0.47862100 | -1.01717900 |
| C | 0.88820000  | 1.42042100  | -0.28088800 |
| C | 1.50234900  | 2.52955400  | -0.93388500 |
| C | 0.90407200  | 1.56111700  | 1.13559600  |
| C | 2.14130900  | 3.59984100  | -0.28478000 |
| F | 1.48361000  | 2.61225500  | -2.33334300 |
| C | 1.52804900  | 2.60011200  | 1.84752100  |
| F | 0.21890700  | 0.62251400  | 1.92019000  |
| C | 2.16935300  | 3.62262400  | 1.12280700  |
| F | 2.72508000  | 4.64013600  | -0.99694600 |
| F | 1.50087600  | 2.65555500  | 3.23511000  |
| F | 2.78629000  | 4.66275600  | 1.78815800  |
| C | -3.06084800 | 0.07252200  | 2.67245900  |
| H | -2.23751900 | 0.59589300  | 2.17598200  |
| C | -4.49334700 | -0.73794300 | -2.30134900 |
| H | -3.54254100 | -0.22870100 | -2.47154300 |
| C | 0.71309000  | -1.61029300 | -0.24786600 |
| C | -0.35901300 | -2.30674600 | -0.85269400 |
| C | 1.06587700  | -2.12873800 | 1.02498800  |
| C | -1.00966000 | -3.41822200 | -0.28344200 |
| C | 0.44388700  | -3.23070500 | 1.63888100  |
| C | -0.60249500 | -3.89089300 | 0.97381800  |
| F | 2.09906700  | -1.54057100 | 1.76113900  |
| F | 0.84660400  | -3.66873800 | 2.89473700  |
| F | -1.23640700 | -4.97585400 | 1.55909300  |
| F | -2.05217200 | -4.05248200 | -0.95213000 |
| F | -0.85007600 | -1.91035900 | -2.10406100 |
| C | 1.52089900  | -0.34295600 | -2.62421700 |
| H | 0.56147800  | -0.00572000 | -3.01595900 |
| H | 2.29793800  | 0.33414600  | -3.00448200 |
| H | 1.71413000  | -1.33392900 | -3.06517200 |
| H | -6.81214300 | -2.48097000 | 1.41469700  |
| C | -3.82814400 | 1.11116400  | 3.54601100  |
| H | -4.29124600 | 1.90075900  | 2.93460200  |
| H | -4.63047700 | 0.63409000  | 4.12818800  |
| H | -3.13859700 | 1.58627900  | 4.26258100  |
| C | -2.41127700 | -1.01626500 | 3.57682300  |
| H | -1.86511100 | -1.75721800 | 2.97926200  |
| H | -1.69574300 | -0.55014900 | 4.27164900  |
| H | -3.16032600 | -1.55398800 | 4.17736000  |
| C | -4.41771800 | -2.08916300 | -3.07100000 |
| H | -4.24719800 | -1.89871800 | -4.14278000 |
| H | -3.58782400 | -2.70347000 | -2.69924600 |
| H | -5.34588200 | -2.67256000 | -2.98144900 |
| C | -5.62341200 | 0.16818500  | -2.87750900 |
| H | -5.64625400 | 1.15249500  | -2.38264100 |
| H | -5.46778400 | 0.33010000  | -3.95633900 |
| H | -6.61545100 | -0.29072700 | -2.74839500 |
| H | -0.39790200 | 4.42445800  | 0.56572000  |
| H | -1.13357600 | 4.71650600  | -2.02207800 |
| H | -2.37348800 | 3.13312200  | 1.87396600  |

|   |             |            |             |
|---|-------------|------------|-------------|
| H | -3.61950500 | 3.68137700 | -2.29580600 |
| H | -4.38783100 | 2.67978000 | 0.10606400  |

|                |           |           |           |
|----------------|-----------|-----------|-----------|
| Frequencies -- | -205.1901 | 16.7548   | 21.0535   |
| Frequencies -- | 26.1774   | 29.5297   | 33.3815   |
| Frequencies -- | 34.1637   | 38.1361   | 40.1329   |
| Frequencies -- | 45.7708   | 48.7324   | 53.4823   |
| Frequencies -- | 58.5040   | 62.9995   | 66.2580   |
| Frequencies -- | 78.6800   | 84.1732   | 86.7217   |
| Frequencies -- | 91.3732   | 98.9431   | 100.6571  |
| Frequencies -- | 108.2889  | 118.2349  | 118.8085  |
| Frequencies -- | 123.8432  | 125.9410  | 128.8414  |
| Frequencies -- | 134.6852  | 142.1741  | 150.6596  |
| Frequencies -- | 154.0633  | 156.5554  | 164.5819  |
| Frequencies -- | 173.9713  | 190.2230  | 199.7233  |
| Frequencies -- | 201.8064  | 205.0856  | 206.8851  |
| Frequencies -- | 213.2522  | 220.9821  | 232.0814  |
| Frequencies -- | 235.2618  | 238.8973  | 240.0663  |
| Frequencies -- | 246.0872  | 251.8350  | 257.9069  |
| Frequencies -- | 263.9513  | 265.3394  | 266.6774  |
| Frequencies -- | 268.6380  | 271.6572  | 275.4990  |
| Frequencies -- | 275.7837  | 277.2620  | 289.9122  |
| Frequencies -- | 295.6975  | 301.5955  | 303.5984  |
| Frequencies -- | 305.5956  | 308.0720  | 313.7265  |
| Frequencies -- | 318.0586  | 318.9258  | 321.5144  |
| Frequencies -- | 326.6902  | 329.9088  | 332.3752  |
| Frequencies -- | 373.4651  | 376.1996  | 377.1956  |
| Frequencies -- | 380.5513  | 410.1679  | 423.0297  |
| Frequencies -- | 424.4554  | 425.9695  | 432.1577  |
| Frequencies -- | 433.1871  | 434.0502  | 437.3543  |
| Frequencies -- | 442.5221  | 450.7656  | 454.9965  |
| Frequencies -- | 486.2201  | 501.0036  | 537.7818  |
| Frequencies -- | 540.6064  | 543.8558  | 545.1231  |
| Frequencies -- | 551.5278  | 561.8416  | 570.3852  |
| Frequencies -- | 574.5336  | 592.3628  | 596.4299  |
| Frequencies -- | 611.2684  | 621.3937  | 629.0757  |
| Frequencies -- | 631.0942  | 638.0295  | 642.0106  |
| Frequencies -- | 643.6672  | 649.6460  | 675.4917  |
| Frequencies -- | 688.1502  | 694.9182  | 715.8309  |
| Frequencies -- | 717.6438  | 721.1548  | 726.8185  |
| Frequencies -- | 738.1543  | 750.0089  | 765.2896  |
| Frequencies -- | 783.0749  | 796.5365  | 804.8646  |
| Frequencies -- | 815.8896  | 819.8155  | 825.9559  |
| Frequencies -- | 828.9023  | 842.5399  | 845.7575  |
| Frequencies -- | 875.4919  | 886.4350  | 894.4110  |
| Frequencies -- | 898.5369  | 901.0532  | 907.9241  |
| Frequencies -- | 918.9826  | 921.8366  | 928.3175  |
| Frequencies -- | 931.6239  | 933.1686  | 938.7052  |
| Frequencies -- | 962.2102  | 964.4751  | 986.7113  |
| Frequencies -- | 992.9174  | 994.7903  | 997.7383  |
| Frequencies -- | 1032.2967 | 1036.5610 | 1041.0676 |
| Frequencies -- | 1042.1397 | 1055.0276 | 1057.4428 |
| Frequencies -- | 1059.4604 | 1072.2124 | 1081.9740 |
| Frequencies -- | 1090.0697 | 1097.7937 | 1111.5591 |
| Frequencies -- | 1112.8773 | 1116.9321 | 1133.8382 |
| Frequencies -- | 1166.3327 | 1167.9022 | 1180.0044 |
| Frequencies -- | 1182.1386 | 1189.0360 | 1206.0093 |
| Frequencies -- | 1214.4137 | 1222.0158 | 1249.0485 |
| Frequencies -- | 1249.6112 | 1277.3206 | 1288.2486 |
| Frequencies -- | 1304.8863 | 1310.7234 | 1326.1299 |
| Frequencies -- | 1327.3064 | 1329.5230 | 1332.7243 |
| Frequencies -- | 1340.8965 | 1341.9377 | 1356.6241 |

|                |           |           |           |
|----------------|-----------|-----------|-----------|
| Frequencies -- | 1368.9559 | 1378.4951 | 1383.0540 |
| Frequencies -- | 1397.1734 | 1400.1510 | 1401.8494 |
| Frequencies -- | 1404.1985 | 1414.6076 | 1419.8930 |
| Frequencies -- | 1422.1445 | 1423.5645 | 1433.8603 |
| Frequencies -- | 1438.2741 | 1447.5300 | 1448.0626 |
| Frequencies -- | 1452.6811 | 1455.8192 | 1470.9219 |
| Frequencies -- | 1473.4738 | 1474.1297 | 1488.7707 |
| Frequencies -- | 1489.3387 | 1489.9220 | 1491.0368 |
| Frequencies -- | 1496.8151 | 1501.2574 | 1501.7105 |
| Frequencies -- | 1503.5412 | 1508.5581 | 1509.9796 |
| Frequencies -- | 1569.6237 | 1581.9258 | 1594.2313 |
| Frequencies -- | 1596.3665 | 1597.3022 | 1605.4732 |
| Frequencies -- | 1619.8593 | 1622.9190 | 3004.5455 |
| Frequencies -- | 3010.1859 | 3012.3005 | 3024.1021 |
| Frequencies -- | 3024.6372 | 3038.1845 | 3103.4178 |
| Frequencies -- | 3108.0779 | 3110.3832 | 3111.5889 |
| Frequencies -- | 3115.6273 | 3117.6890 | 3120.7328 |
| Frequencies -- | 3137.5083 | 3138.0653 | 3151.3716 |
| Frequencies -- | 3154.1418 | 3165.5662 | 3168.5980 |
| Frequencies -- | 3173.8989 | 3191.4364 | 3203.5664 |
| Frequencies -- | 3213.2518 | 3248.5513 | 3258.2232 |
| Frequencies -- | 3276.1382 | 3284.6222 | 3309.5132 |

**Catalyst 4:**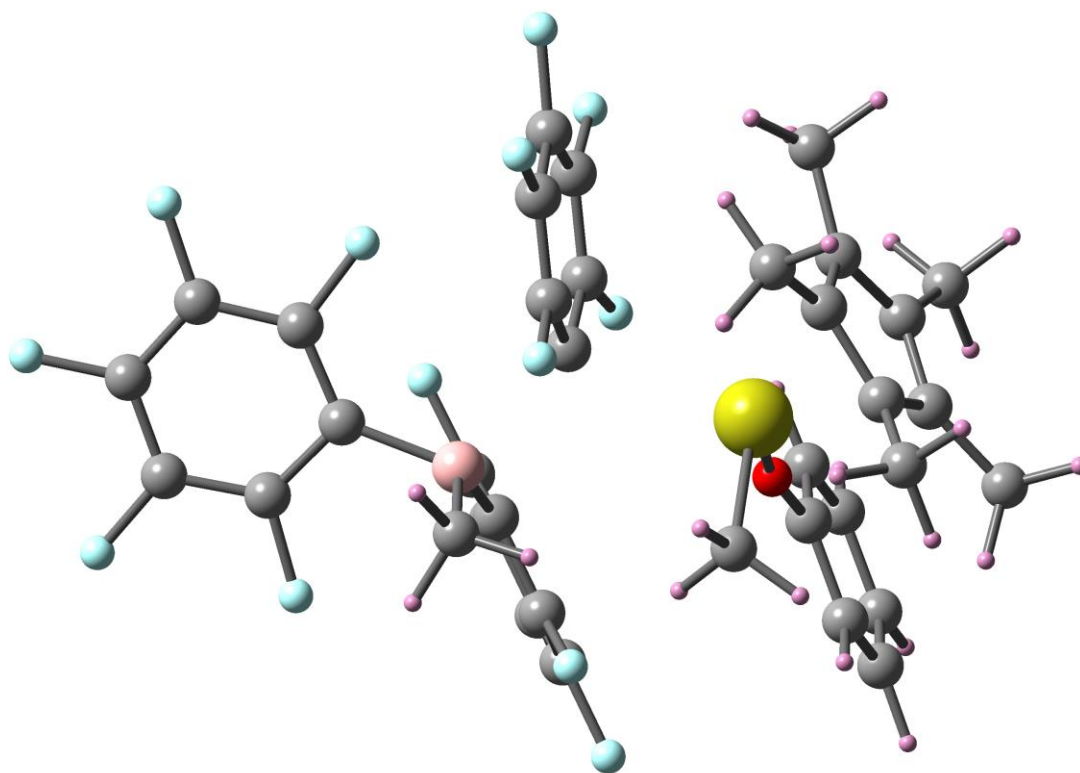

| <b>vacuum</b> | <b>toluene-like solvent</b> | <b>D3 dispersion</b> |
|---------------|-----------------------------|----------------------|
| -3042.3473585 | -3042.3576523               | -0.55856653          |

Imaginary frequency corresponding to vibration along the reaction coordinate:  $-225\text{ cm}^{-1}$ .

|    |             |             |             |
|----|-------------|-------------|-------------|
| Ti | 2.38064000  | -0.59862500 | -0.66243300 |
| C  | 2.32226500  | -0.13612300 | -2.68329300 |
| H  | 1.53366600  | 0.62791200  | -2.72509600 |
| H  | 3.23610900  | 0.27592000  | -3.12863000 |
| H  | 2.01550400  | -1.03456800 | -3.24363300 |
| O  | 2.42979100  | 1.06607000  | -0.05672700 |
| C  | 2.76054100  | 2.32303600  | 0.42995200  |
| C  | 2.54201400  | 2.63542200  | 1.79392900  |
| C  | 3.28330100  | 3.29288900  | -0.45999100 |
| C  | 2.85841100  | 3.92617900  | 2.26356700  |
| C  | 3.59608300  | 4.57830600  | 0.02446900  |
| C  | 3.38806000  | 4.89908500  | 1.38528000  |
| H  | 2.68004900  | 4.17314400  | 3.31219900  |
| H  | 3.98673200  | 5.33065500  | -0.66364100 |
| C  | 3.51859700  | -2.45156300 | 0.56390000  |
| C  | 3.52559900  | -2.84071000 | -0.82890200 |
| C  | 4.26746900  | -1.22103000 | 0.69269300  |
| C  | 4.30807700  | -1.86964300 | -1.55645400 |
| C  | 4.75792000  | -0.86023400 | -0.61914400 |
| F  | -7.39807200 | -1.01320500 | -0.26943800 |
| C  | -6.03540300 | -0.78527900 | -0.39324500 |
| C  | -5.10446900 | -1.65877600 | 0.18703000  |

|   |             |             |             |
|---|-------------|-------------|-------------|
| C | -5.55418700 | 0.32796800  | -1.10199100 |
| C | -3.72446000 | -1.40468600 | 0.04490900  |
| F | -5.54657800 | -2.76541300 | 0.90346900  |
| C | -4.16645600 | 0.53078500  | -1.21296000 |
| F | -6.45007200 | 1.21647000  | -1.68475400 |
| C | -3.17018000 | -0.31525500 | -0.65381100 |
| F | -2.89595300 | -2.33143400 | 0.69129800  |
| F | -3.79072600 | 1.67674000  | -1.93236900 |
| B | -1.59325500 | 0.09614600  | -1.03186600 |
| C | -0.13069300 | -1.21881700 | -0.07379800 |
| C | -0.22591400 | -2.55682200 | -0.54387200 |
| C | -0.08901200 | -1.14990800 | 1.34686200  |
| C | -0.37708700 | -3.69282800 | 0.26894600  |
| F | -0.16229000 | -2.81191000 | -1.92496400 |
| C | -0.25062000 | -2.24139000 | 2.21621700  |
| F | 0.16209900  | 0.08172900  | 1.97219700  |
| C | -0.41182900 | -3.52558100 | 1.66463800  |
| F | -0.46610400 | -4.97359900 | -0.26851800 |
| F | -0.20409700 | -2.09245900 | 3.59815500  |
| F | -0.53859100 | -4.62521600 | 2.49201300  |
| C | -1.27972600 | 1.58516200  | -0.42895300 |
| C | -0.65233000 | 2.62001600  | -1.16099400 |
| C | -1.78451200 | 2.01800700  | 0.82417100  |
| C | -0.53234200 | 3.95064500  | -0.71690700 |
| C | -1.67462900 | 3.32939900  | 1.32047900  |
| C | -1.04504700 | 4.31160700  | 0.53839700  |
| F | -2.44765400 | 1.11520100  | 1.66225300  |
| F | -2.18157800 | 3.66406500  | 2.57125300  |
| F | -0.91639800 | 5.61071300  | 1.00657700  |
| F | 0.09754200  | 4.90760900  | -1.50596400 |
| F | -0.09818200 | 2.37061800  | -2.42348700 |
| C | -1.40958900 | -0.20286600 | -2.60715200 |
| H | -0.38505400 | -0.16162400 | -2.97706300 |
| H | -1.82404400 | -1.18651400 | -2.86744400 |
| H | -1.98363600 | 0.54890600  | -3.17155900 |
| C | 3.08997300  | -3.30603400 | 1.73455000  |
| H | 3.98119800  | -3.81717200 | 2.13910700  |
| H | 2.66049700  | -2.72463700 | 2.56041000  |
| H | 2.37870200  | -4.08928700 | 1.45513000  |
| C | 3.00903100  | -4.13424900 | -1.41921800 |
| H | 3.85851000  | -4.79994900 | -1.65081200 |
| H | 2.34992100  | -4.67868900 | -0.73488400 |
| H | 2.45769600  | -3.98120400 | -2.35773000 |
| C | 4.63837300  | -0.56281600 | 2.00169800  |
| H | 4.90770900  | 0.49249800  | 1.87888000  |
| H | 3.83016000  | -0.61553500 | 2.74453600  |
| H | 5.51305500  | -1.07554500 | 2.43945800  |
| C | 4.79007600  | -2.04519200 | -2.97571900 |
| H | 5.63354900  | -2.75786900 | -2.98611600 |
| H | 4.01495500  | -2.45285900 | -3.63856300 |
| H | 5.15324500  | -1.10887800 | -3.41692100 |
| C | 5.72157700  | 0.26018800  | -0.93451600 |
| H | 5.66702100  | 1.07769100  | -0.20615600 |
| H | 6.75641700  | -0.12439800 | -0.91858300 |
| H | 5.55217200  | 0.68993300  | -1.93141100 |
| H | 3.62239100  | 5.89914800  | 1.75408100  |
| H | 2.11449500  | 1.88707700  | 2.45902900  |

| H              | 3.41944700 | 3.04378000 | -1.51200300 |
|----------------|------------|------------|-------------|
| Frequencies -- | -224.9637  | 11.2449    | 17.8277     |
| Frequencies -- | 19.5667    | 29.1770    | 33.1210     |
| Frequencies -- | 34.4478    | 38.1151    | 45.5432     |
| Frequencies -- | 47.6428    | 51.0929    | 54.5260     |
| Frequencies -- | 56.4106    | 60.6424    | 63.3895     |
| Frequencies -- | 79.6752    | 91.8682    | 95.1397     |
| Frequencies -- | 103.8125   | 110.7463   | 112.6687    |
| Frequencies -- | 115.7865   | 117.4829   | 120.0175    |
| Frequencies -- | 122.4089   | 127.6511   | 135.4030    |
| Frequencies -- | 136.6603   | 144.9579   | 148.2688    |
| Frequencies -- | 149.9659   | 151.6949   | 157.3741    |
| Frequencies -- | 158.8692   | 164.8594   | 168.5876    |
| Frequencies -- | 185.0294   | 195.3620   | 202.4553    |
| Frequencies -- | 204.4040   | 207.5656   | 215.1810    |
| Frequencies -- | 223.0355   | 234.8326   | 237.7622    |
| Frequencies -- | 251.2555   | 263.9220   | 265.2544    |
| Frequencies -- | 267.0475   | 268.6535   | 270.6202    |
| Frequencies -- | 275.4091   | 277.7852   | 277.9023    |
| Frequencies -- | 286.8929   | 287.6922   | 292.8001    |
| Frequencies -- | 294.5147   | 299.0206   | 301.4300    |
| Frequencies -- | 306.0564   | 307.0413   | 317.1578    |
| Frequencies -- | 317.2462   | 319.4248   | 328.2891    |
| Frequencies -- | 329.7279   | 334.2104   | 368.9262    |
| Frequencies -- | 371.9365   | 375.4119   | 381.3731    |
| Frequencies -- | 389.4691   | 403.3330   | 407.9933    |
| Frequencies -- | 408.5198   | 423.3004   | 425.2582    |
| Frequencies -- | 431.5930   | 434.1132   | 442.4201    |
| Frequencies -- | 450.6334   | 454.9283   | 455.4231    |
| Frequencies -- | 485.7054   | 505.9552   | 514.1932    |
| Frequencies -- | 529.1356   | 535.1924   | 540.1524    |
| Frequencies -- | 542.7193   | 551.4169   | 551.4953    |
| Frequencies -- | 571.9503   | 584.7430   | 592.5976    |
| Frequencies -- | 593.1914   | 601.2269   | 612.5341    |
| Frequencies -- | 618.6595   | 628.6434   | 638.2400    |
| Frequencies -- | 642.6850   | 645.2247   | 648.8561    |
| Frequencies -- | 655.6618   | 673.1316   | 688.7227    |
| Frequencies -- | 691.8925   | 700.4834   | 714.3610    |
| Frequencies -- | 717.0052   | 720.0524   | 738.1807    |
| Frequencies -- | 750.8877   | 761.2380   | 782.3435    |
| Frequencies -- | 798.5288   | 805.5859   | 831.2207    |
| Frequencies -- | 836.6357   | 889.9897   | 899.0609    |
| Frequencies -- | 907.6351   | 921.0807   | 921.3475    |
| Frequencies -- | 925.2501   | 965.4896   | 968.6650    |
| Frequencies -- | 976.1939   | 986.3389   | 992.1995    |
| Frequencies -- | 996.0696   | 998.6546   | 1008.0774   |
| Frequencies -- | 1030.1944  | 1036.3320  | 1039.0277   |
| Frequencies -- | 1040.5477  | 1041.1886  | 1043.3615   |
| Frequencies -- | 1047.6895  | 1048.7923  | 1057.5266   |
| Frequencies -- | 1059.2159  | 1084.3998  | 1085.5468   |
| Frequencies -- | 1087.2269  | 1090.4700  | 1123.2044   |
| Frequencies -- | 1171.1291  | 1174.9599  | 1175.9933   |
| Frequencies -- | 1184.0829  | 1189.3304  | 1192.8808   |
| Frequencies -- | 1213.8650  | 1221.8063  | 1235.3640   |
| Frequencies -- | 1246.6413  | 1310.3572  | 1325.8315   |
| Frequencies -- | 1326.8663  | 1334.8648  | 1341.9032   |
| Frequencies -- | 1356.8892  | 1373.8602  | 1374.7866   |
| Frequencies -- | 1379.8578  | 1409.4319  | 1414.3003   |
| Frequencies -- | 1414.9921  | 1422.1878  | 1423.3002   |
| Frequencies -- | 1426.8614  | 1427.0469  | 1431.6984   |
| Frequencies -- | 1433.5445  | 1436.9815  | 1447.9182   |
| Frequencies -- | 1450.2032  | 1453.1312  | 1455.4964   |

|                |           |           |           |
|----------------|-----------|-----------|-----------|
| Frequencies -- | 1457.2136 | 1462.5066 | 1471.0083 |
| Frequencies -- | 1472.9478 | 1483.2244 | 1483.6026 |
| Frequencies -- | 1490.5519 | 1492.6691 | 1496.5742 |
| Frequencies -- | 1497.9506 | 1499.8525 | 1505.9003 |
| Frequencies -- | 1507.2077 | 1507.7746 | 1508.5051 |
| Frequencies -- | 1514.2942 | 1518.9424 | 1574.0200 |
| Frequencies -- | 1585.6926 | 1596.6076 | 1596.7340 |
| Frequencies -- | 1597.5057 | 1607.5648 | 1619.8250 |
| Frequencies -- | 1622.3132 | 3008.2107 | 3008.6159 |
| Frequencies -- | 3010.6953 | 3012.3788 | 3014.3976 |
| Frequencies -- | 3016.4670 | 3038.1487 | 3099.1728 |
| Frequencies -- | 3100.2464 | 3101.1635 | 3104.3907 |
| Frequencies -- | 3110.5503 | 3120.3190 | 3136.8186 |
| Frequencies -- | 3145.8601 | 3150.2138 | 3155.5984 |
| Frequencies -- | 3158.0085 | 3161.9196 | 3168.3425 |
| Frequencies -- | 3172.3194 | 3177.1135 | 3195.0953 |
| Frequencies -- | 3208.2184 | 3211.8346 | 3221.5810 |



**Catalyst 5:**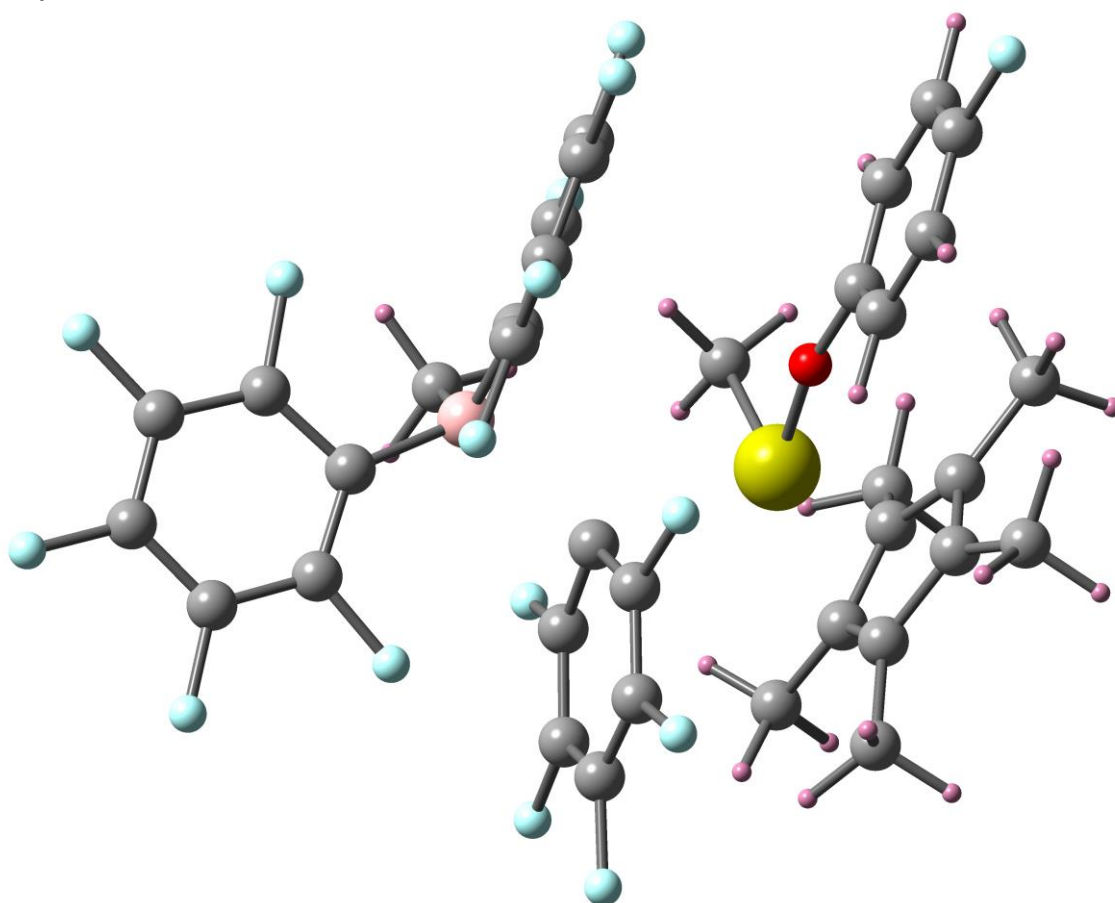

| <b>vacuum</b> | <b>toluene-like solvent</b> | <b>D3 dispersion</b> |
|---------------|-----------------------------|----------------------|
| -3141.5719347 | -3141.5830509               | -0.55910048          |

Imaginary frequency corresponding to vibration along the reaction coordinate:  $-228 \text{ cm}^{-1}$ .

|    |            |             |             |
|----|------------|-------------|-------------|
| Ti | 2.14731800 | -1.09846700 | -0.72093400 |
| C  | 2.13629600 | -0.70293700 | -2.75684100 |
| H  | 1.46975000 | 0.16779600  | -2.82397600 |
| H  | 3.10028900 | -0.44575200 | -3.21324900 |
| H  | 1.69885600 | -1.56251700 | -3.29029600 |
| O  | 2.47004600 | 0.55993500  | -0.17244500 |
| C  | 3.01331700 | 1.75342500  | 0.27406300  |
| C  | 2.87257700 | 2.13265800  | 1.63247600  |
| C  | 3.68030500 | 2.59996500  | -0.64677300 |
| C  | 3.41526100 | 3.35371300  | 2.07561900  |
| C  | 4.22550400 | 3.82058600  | -0.20680600 |
| C  | 4.08715300 | 4.16959200  | 1.14808600  |
| H  | 3.31472100 | 3.67323800  | 3.11245500  |
| H  | 4.73295000 | 4.49436600  | -0.89633900 |
| C  | 3.01105500 | -3.03033300 | 0.58103700  |
| C  | 2.89928900 | -3.49814900 | -0.78356000 |
| C  | 3.96555700 | -1.94441500 | 0.60881100  |
| C  | 3.80627000 | -2.72073100 | -1.59426600 |
| C  | 4.45756100 | -1.75090800 | -0.73711700 |

|   |             |             |             |
|---|-------------|-------------|-------------|
| F | -7.56406400 | 0.06467800  | -0.16356100 |
| C | -6.18532400 | 0.06717500  | -0.31386400 |
| C | -5.39310700 | -0.91198000 | 0.30261200  |
| C | -5.54803800 | 1.05267500  | -1.08607300 |
| C | -3.99334900 | -0.88793100 | 0.13194200  |
| F | -5.99005800 | -1.89499600 | 1.08387700  |
| C | -4.14805900 | 1.02637400  | -1.22310300 |
| F | -6.30318200 | 2.04166700  | -1.70483100 |
| C | -3.28782700 | 0.06214800  | -0.63077600 |
| F | -3.30883600 | -1.89834300 | 0.82027700  |
| F | -3.60863800 | 2.05980000  | -2.00618200 |
| B | -1.67328700 | 0.20068300  | -1.04358800 |
| C | -0.41939300 | -1.28550800 | -0.04482200 |
| C | -0.74178100 | -2.61134600 | -0.44347100 |
| C | -0.33264900 | -1.15628200 | 1.36945100  |
| C | -1.05198200 | -3.66760000 | 0.42964100  |
| F | -0.75827000 | -2.93858900 | -1.81063600 |
| C | -0.64511400 | -2.16357600 | 2.29693800  |
| F | 0.12711900  | 0.04769000  | 1.92769800  |
| C | -1.02333600 | -3.43040200 | 1.81535600  |
| F | -1.36043100 | -4.94088400 | -0.03945900 |
| F | -0.53932200 | -1.95742400 | 3.66810300  |
| F | -1.30293700 | -4.45406200 | 2.70027900  |
| C | -1.11574100 | 1.64403700  | -0.51071500 |
| C | -0.33691300 | 2.52980300  | -1.29090000 |
| C | -1.52435100 | 2.20576000  | 0.72645600  |
| C | 0.01051600  | 3.83804200  | -0.90390500 |
| C | -1.19353300 | 3.50077600  | 1.16445600  |
| C | -0.41962000 | 4.33156600  | 0.33725000  |
| F | -2.31002500 | 1.45800800  | 1.60987500  |
| F | -1.62143800 | 3.96626800  | 2.40241800  |
| F | -0.07145900 | 5.60920000  | 0.74792900  |
| F | 0.78475200  | 4.64096900  | -1.73564200 |
| F | 0.15038300  | 2.14111000  | -2.54569400 |
| C | -1.56500500 | -0.19327900 | -2.60494300 |
| H | -0.55323400 | -0.34203700 | -2.98239200 |
| H | -2.14054400 | -1.10487100 | -2.81645900 |
| H | -2.01440900 | 0.61712400  | -3.20022200 |
| C | 2.48949500  | -3.72681900 | 1.81712400  |
| H | 3.30272300  | -4.34036500 | 2.24290600  |
| H | 2.17504600  | -3.03248600 | 2.60685900  |
| H | 1.66054200  | -4.40895400 | 1.60506900  |
| C | 2.15143900  | -4.71851200 | -1.27393900 |
| H | 2.87122200  | -5.52022500 | -1.51268500 |
| H | 1.45936300  | -5.11850500 | -0.52577400 |
| H | 1.57383600  | -4.52441600 | -2.18870800 |
| C | 4.49789000  | -1.29045000 | 1.86250900  |
| H | 4.93671000  | -0.30473900 | 1.66948200  |
| H | 3.72450000  | -1.16702000 | 2.63321300  |
| H | 5.29135800  | -1.92184600 | 2.29968100  |
| C | 4.19101200  | -3.05378400 | -3.01500500 |
| H | 4.94838800  | -3.85739000 | -3.00684800 |
| H | 3.34020500  | -3.41712000 | -3.60658000 |
| H | 4.63076600  | -2.20068400 | -3.54613200 |
| C | 5.58487100  | -0.83353600 | -1.15016500 |
| H | 5.68128500  | 0.03726800  | -0.49067900 |
| H | 6.54276900  | -1.38112900 | -1.10837600 |

|   |            |             |             |
|---|------------|-------------|-------------|
| H | 5.47015900 | -0.46494800 | -2.17881800 |
| H | 2.33170400 | 1.48743400  | 2.32149400  |
| H | 3.75256300 | 2.31131000  | -1.69442800 |
| F | 4.63663700 | 5.38279200  | 1.59090100  |

|                |           |           |           |
|----------------|-----------|-----------|-----------|
| Frequencies -- | -227.6342 | 11.9149   | 14.5368   |
| Frequencies -- | 17.4376   | 25.7440   | 30.0528   |
| Frequencies -- | 31.7471   | 35.3565   | 40.2307   |
| Frequencies -- | 45.0224   | 50.4649   | 54.2877   |
| Frequencies -- | 56.0803   | 58.8754   | 63.2661   |
| Frequencies -- | 79.3270   | 91.3165   | 94.2549   |
| Frequencies -- | 100.5204  | 108.8404  | 110.4406  |
| Frequencies -- | 115.3694  | 120.1907  | 122.7419  |
| Frequencies -- | 126.0333  | 128.4572  | 136.6241  |
| Frequencies -- | 138.1911  | 142.1729  | 145.8761  |
| Frequencies -- | 148.7621  | 151.0483  | 157.2304  |
| Frequencies -- | 158.5243  | 164.1872  | 168.6033  |
| Frequencies -- | 175.8047  | 188.9643  | 200.0158  |
| Frequencies -- | 202.9203  | 206.7791  | 214.1875  |
| Frequencies -- | 221.5732  | 236.1739  | 239.8662  |
| Frequencies -- | 251.4247  | 261.8323  | 263.9531  |
| Frequencies -- | 265.1766  | 267.5190  | 268.3254  |
| Frequencies -- | 271.5667  | 275.7087  | 276.9110  |
| Frequencies -- | 277.7651  | 282.1170  | 289.6027  |
| Frequencies -- | 294.9065  | 295.6658  | 302.0325  |
| Frequencies -- | 304.5233  | 306.1641  | 306.4675  |
| Frequencies -- | 312.2095  | 317.2351  | 320.2713  |
| Frequencies -- | 328.6467  | 333.1613  | 352.6065  |
| Frequencies -- | 363.7001  | 370.8531  | 375.0488  |
| Frequencies -- | 381.6408  | 387.3188  | 403.8894  |
| Frequencies -- | 409.7785  | 411.3357  | 416.0613  |
| Frequencies -- | 422.7621  | 425.1561  | 431.6855  |
| Frequencies -- | 433.9592  | 441.3688  | 450.8729  |
| Frequencies -- | 454.6652  | 464.9653  | 485.0145  |
| Frequencies -- | 506.3181  | 516.1256  | 530.2052  |
| Frequencies -- | 534.6586  | 539.9229  | 542.9174  |
| Frequencies -- | 551.4392  | 552.8562  | 570.3048  |
| Frequencies -- | 571.9789  | 586.2037  | 590.7408  |
| Frequencies -- | 592.6883  | 605.4535  | 611.1180  |
| Frequencies -- | 628.7684  | 632.9556  | 637.2710  |
| Frequencies -- | 642.0540  | 644.6784  | 650.0555  |
| Frequencies -- | 673.2721  | 690.0620  | 693.0097  |
| Frequencies -- | 702.4416  | 715.1196  | 717.1095  |
| Frequencies -- | 719.8294  | 737.6631  | 750.3073  |
| Frequencies -- | 782.0173  | 792.2522  | 798.8102  |
| Frequencies -- | 807.3869  | 810.5155  | 827.6894  |
| Frequencies -- | 835.4158  | 890.0896  | 897.8637  |
| Frequencies -- | 907.5027  | 916.8935  | 922.0318  |
| Frequencies -- | 949.3123  | 961.8240  | 963.4506  |
| Frequencies -- | 972.8931  | 985.4062  | 990.5896  |
| Frequencies -- | 996.6797  | 1013.8037 | 1036.1222 |
| Frequencies -- | 1039.2080 | 1040.8839 | 1041.1357 |
| Frequencies -- | 1043.7824 | 1046.9778 | 1049.7659 |
| Frequencies -- | 1057.3801 | 1059.0099 | 1085.1341 |
| Frequencies -- | 1085.4486 | 1086.9521 | 1113.8476 |
| Frequencies -- | 1123.2893 | 1169.4410 | 1171.7333 |
| Frequencies -- | 1175.3355 | 1175.9235 | 1187.2049 |
| Frequencies -- | 1202.6609 | 1214.0444 | 1221.9998 |
| Frequencies -- | 1244.8457 | 1250.5252 | 1306.3006 |
| Frequencies -- | 1310.8204 | 1327.0557 | 1336.4032 |
| Frequencies -- | 1342.3470 | 1356.4473 | 1359.5768 |
| Frequencies -- | 1366.9873 | 1379.1121 | 1411.4723 |

|                |           |           |           |
|----------------|-----------|-----------|-----------|
| Frequencies -- | 1414.0328 | 1414.1990 | 1421.9012 |
| Frequencies -- | 1423.1447 | 1423.9448 | 1426.8348 |
| Frequencies -- | 1430.1007 | 1432.2832 | 1433.4735 |
| Frequencies -- | 1438.4711 | 1448.1824 | 1450.4744 |
| Frequencies -- | 1453.7112 | 1457.4792 | 1463.8636 |
| Frequencies -- | 1471.2564 | 1472.9565 | 1482.5812 |
| Frequencies -- | 1492.0823 | 1493.3053 | 1494.5372 |
| Frequencies -- | 1494.7083 | 1497.9287 | 1501.5701 |
| Frequencies -- | 1502.2055 | 1505.7638 | 1507.5458 |
| Frequencies -- | 1509.1235 | 1517.1794 | 1520.5938 |
| Frequencies -- | 1574.2055 | 1585.6928 | 1596.4963 |
| Frequencies -- | 1597.4814 | 1598.0264 | 1615.7673 |
| Frequencies -- | 1620.1375 | 1622.1574 | 3010.1601 |
| Frequencies -- | 3010.8062 | 3011.0425 | 3013.2058 |
| Frequencies -- | 3016.1062 | 3017.1600 | 3038.4266 |
| Frequencies -- | 3100.8938 | 3102.0361 | 3102.4350 |
| Frequencies -- | 3105.2104 | 3109.2533 | 3121.1977 |
| Frequencies -- | 3138.4273 | 3147.3780 | 3151.4700 |
| Frequencies -- | 3155.9467 | 3159.3966 | 3162.8621 |
| Frequencies -- | 3172.7928 | 3203.0830 | 3207.7598 |
| Frequencies -- | 3208.6027 | 3220.9885 | 3233.0261 |

**Catalyst 6:**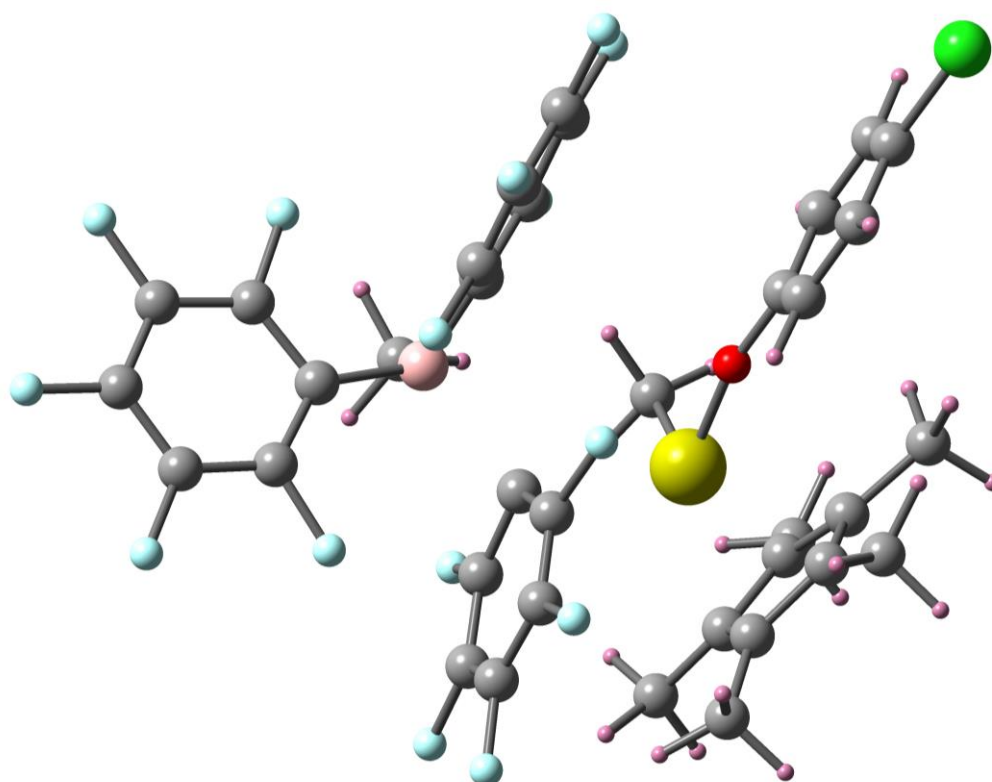

| <b>vacuum</b> | <b>toluene-like solvent</b> | <b>D3 dispersion</b> |
|---------------|-----------------------------|----------------------|
| -3056.7016427 | -3056.7124197               | -0.56622308          |

Imaginary frequency corresponding to vibration along the reaction coordinate:  $-228 \text{ cm}^{-1}$ .

|    |             |             |             |
|----|-------------|-------------|-------------|
| Ti | 1.74760100  | -1.62929600 | -0.75294100 |
| C  | 1.74662600  | -1.30122500 | -2.79759200 |
| H  | 1.25312700  | -0.32182800 | -2.86449100 |
| H  | 2.72181500  | -1.24007400 | -3.29568700 |
| H  | 1.13258200  | -2.07530100 | -3.28640600 |
| O  | 2.41937800  | -0.05660600 | -0.26898200 |
| C  | 3.19554100  | 1.01569600  | 0.13566900  |
| C  | 3.18064200  | 1.43165900  | 1.48968900  |
| C  | 3.97739400  | 1.70755500  | -0.82181800 |
| C  | 3.96438900  | 2.53170700  | 1.88818700  |
| C  | 4.76135000  | 2.80596800  | -0.42081300 |
| C  | 4.75238800  | 3.20551400  | 0.93177500  |
| H  | 3.95134300  | 2.86366300  | 2.92597100  |
| H  | 5.35573200  | 3.34959900  | -1.15463000 |
| C  | 2.15235700  | -3.75583000 | 0.51238600  |
| C  | 2.03683000  | -4.13241500 | -0.87795100 |
| C  | 3.27288400  | -2.85115000 | 0.64513700  |
| C  | 3.11660200  | -3.50050200 | -1.60003500 |
| C  | 3.87547100  | -2.69771300 | -0.66112000 |
| F  | -7.50800200 | 1.49597700  | -0.01857800 |
| C  | -6.16200600 | 1.21624100  | -0.20212500 |
| C  | -5.56368800 | 0.11602300  | 0.42867600  |
| C  | -5.36411300 | 2.02964200  | -1.02378300 |

|    |             |             |             |
|----|-------------|-------------|-------------|
| C  | -4.19346200 | -0.14738800 | 0.22336400  |
| F  | -6.32149200 | -0.70376300 | 1.25743500  |
| C  | -4.00278500 | 1.71780600  | -1.19393500 |
| F  | -5.92419800 | 3.13155600  | -1.65887500 |
| C  | -3.33575300 | 0.61709700  | -0.59027500 |
| F  | -3.70466600 | -1.25403100 | 0.93047000  |
| F  | -3.29221000 | 2.59841600  | -2.02550000 |
| B  | -1.74092200 | 0.41187300  | -1.05135500 |
| C  | -0.78472100 | -1.26511400 | -0.03090000 |
| C  | -1.37755300 | -2.51077600 | -0.37554400 |
| C  | -0.63070700 | -1.11503200 | 1.37584000  |
| C  | -1.86819100 | -3.45562500 | 0.54101700  |
| F  | -1.50094900 | -2.86919300 | -1.72906200 |
| C  | -1.10973500 | -2.01233200 | 2.34463100  |
| F  | 0.07494200  | -0.01134100 | 1.88169000  |
| C  | -1.75252900 | -3.18831400 | 1.91654100  |
| F  | -2.43504100 | -4.65649900 | 0.12350200  |
| F  | -0.92311900 | -1.79235500 | 3.70524400  |
| F  | -2.20571500 | -4.10766800 | 2.84265300  |
| C  | -0.88565900 | 1.72976800  | -0.59130000 |
| C  | 0.02977600  | 2.41077900  | -1.42698200 |
| C  | -1.13015200 | 2.40628500  | 0.63162400  |
| C  | 0.64806700  | 3.63327200  | -1.10303700 |
| C  | -0.52870200 | 3.62096800  | 1.00772900  |
| C  | 0.36984600  | 4.24696600  | 0.12783900  |
| F  | -2.02256400 | 1.86723200  | 1.56418500  |
| F  | -0.81130500 | 4.20655100  | 2.23640700  |
| F  | 0.98420800  | 5.43962600  | 0.47678600  |
| F  | 1.54083200  | 4.23180600  | -1.98663700 |
| F  | 0.38541200  | 1.88818700  | -2.67771800 |
| C  | -1.76930300 | -0.04198000 | -2.60029200 |
| H  | -0.82077900 | -0.39540700 | -3.00501800 |
| H  | -2.51863000 | -0.82897000 | -2.76175800 |
| H  | -2.07460100 | 0.82323000  | -3.20950100 |
| C  | 1.45734000  | -4.41968400 | 1.67833000  |
| H  | 2.11520300  | -5.21892600 | 2.06299700  |
| H  | 1.26986200  | -3.73909000 | 2.51794800  |
| H  | 0.51393400  | -4.89887800 | 1.39949200  |
| C  | 1.09215700  | -5.15818300 | -1.46359600 |
| H  | 1.61628100  | -6.12256900 | -1.58369900 |
| H  | 0.21850500  | -5.34078200 | -0.82869600 |
| H  | 0.72207700  | -4.86876700 | -2.45703800 |
| C  | 3.82128400  | -2.33790300 | 1.95676800  |
| H  | 4.44538800  | -1.44586700 | 1.82980500  |
| H  | 3.02688100  | -2.09049700 | 2.67532800  |
| H  | 4.45082800  | -3.11366800 | 2.42683100  |
| C  | 3.53487000  | -3.85264200 | -3.00656100 |
| H  | 4.10310000  | -4.79926700 | -2.98773700 |
| H  | 2.67866900  | -4.00345800 | -3.67711400 |
| H  | 4.18682600  | -3.09364100 | -3.45676300 |
| C  | 5.17444500  | -1.98946300 | -0.96774700 |
| H  | 5.39964100  | -1.19543400 | -0.24641900 |
| H  | 6.00837700  | -2.71199800 | -0.92993600 |
| H  | 5.18136600  | -1.54149600 | -1.97096100 |
| H  | 2.55197400  | 0.91487500  | 2.21191000  |
| H  | 3.95792200  | 1.40024100  | -1.86661000 |
| C1 | 5.77779600  | 4.61728100  | 1.45463000  |

|                |           |           |           |
|----------------|-----------|-----------|-----------|
| Frequencies -- | -228.4720 | 12.2669   | 16.6598   |
| Frequencies -- | 18.1886   | 22.8003   | 29.6019   |
| Frequencies -- | 32.3432   | 35.3161   | 39.5712   |
| Frequencies -- | 45.0674   | 48.1604   | 53.3373   |
| Frequencies -- | 55.6884   | 56.3282   | 62.3235   |
| Frequencies -- | 74.7910   | 85.1613   | 90.4634   |
| Frequencies -- | 93.8016   | 97.9988   | 99.1486   |
| Frequencies -- | 108.0065  | 110.8850  | 114.1552  |
| Frequencies -- | 116.1284  | 122.0906  | 125.7586  |
| Frequencies -- | 127.9419  | 133.5266  | 136.5828  |
| Frequencies -- | 142.0555  | 144.0055  | 149.2758  |
| Frequencies -- | 157.2682  | 163.8679  | 165.3522  |
| Frequencies -- | 172.3122  | 179.9317  | 187.5179  |
| Frequencies -- | 190.2476  | 200.6906  | 203.4717  |
| Frequencies -- | 219.2655  | 224.4727  | 228.5741  |
| Frequencies -- | 235.9179  | 245.1164  | 263.7895  |
| Frequencies -- | 264.6601  | 265.8110  | 266.9604  |
| Frequencies -- | 269.5669  | 272.8192  | 274.1007  |
| Frequencies -- | 275.8944  | 278.1447  | 279.4222  |
| Frequencies -- | 285.8973  | 289.6852  | 293.3713  |
| Frequencies -- | 296.8726  | 301.9956  | 302.8843  |
| Frequencies -- | 304.1643  | 308.0080  | 315.8146  |
| Frequencies -- | 319.5244  | 328.9544  | 331.7882  |
| Frequencies -- | 333.6999  | 364.9481  | 371.5002  |
| Frequencies -- | 374.9790  | 380.8230  | 385.5470  |
| Frequencies -- | 399.7256  | 409.4581  | 410.5054  |
| Frequencies -- | 422.7217  | 424.7479  | 431.3763  |
| Frequencies -- | 434.0684  | 441.9094  | 450.5864  |
| Frequencies -- | 454.8765  | 457.3576  | 468.6313  |
| Frequencies -- | 485.0551  | 491.5896  | 504.3027  |
| Frequencies -- | 528.6525  | 535.1868  | 539.5004  |
| Frequencies -- | 542.8625  | 551.4024  | 552.3209  |
| Frequencies -- | 572.2480  | 585.2708  | 588.5855  |
| Frequencies -- | 591.7586  | 602.8641  | 607.7054  |
| Frequencies -- | 628.6417  | 628.7690  | 637.7707  |
| Frequencies -- | 641.4602  | 644.5851  | 645.1084  |
| Frequencies -- | 647.4416  | 673.8677  | 676.7807  |
| Frequencies -- | 692.2466  | 708.7856  | 714.2455  |
| Frequencies -- | 716.7616  | 719.9326  | 737.8768  |
| Frequencies -- | 750.4050  | 782.0159  | 784.9636  |
| Frequencies -- | 788.7731  | 799.7425  | 806.8990  |
| Frequencies -- | 828.3674  | 890.2329  | 898.2793  |
| Frequencies -- | 907.7023  | 917.8303  | 919.4854  |
| Frequencies -- | 938.7497  | 953.4261  | 963.8520  |
| Frequencies -- | 970.9643  | 986.1615  | 990.9469  |
| Frequencies -- | 996.7426  | 1012.8467 | 1036.0615 |
| Frequencies -- | 1036.9885 | 1039.8054 | 1041.2636 |
| Frequencies -- | 1043.8881 | 1045.7762 | 1047.4286 |
| Frequencies -- | 1057.2465 | 1059.0856 | 1075.8830 |
| Frequencies -- | 1084.7172 | 1086.3111 | 1087.5129 |
| Frequencies -- | 1117.2245 | 1124.4379 | 1171.7791 |
| Frequencies -- | 1175.1971 | 1175.8847 | 1184.8003 |
| Frequencies -- | 1190.9229 | 1214.0228 | 1222.0425 |
| Frequencies -- | 1242.1994 | 1247.7940 | 1310.1919 |
| Frequencies -- | 1310.7022 | 1326.3818 | 1335.1014 |
| Frequencies -- | 1341.8716 | 1352.7986 | 1356.8445 |
| Frequencies -- | 1369.6271 | 1379.4816 | 1411.8242 |
| Frequencies -- | 1414.3760 | 1414.7889 | 1415.0285 |
| Frequencies -- | 1421.4531 | 1422.9206 | 1426.1830 |
| Frequencies -- | 1427.8114 | 1430.3789 | 1432.0454 |
| Frequencies -- | 1435.6545 | 1447.7856 | 1450.4008 |
| Frequencies -- | 1454.7744 | 1455.9255 | 1461.6011 |

|                |           |           |           |
|----------------|-----------|-----------|-----------|
| Frequencies -- | 1471.0292 | 1473.1353 | 1481.0217 |
| Frequencies -- | 1484.6372 | 1489.4872 | 1492.0248 |
| Frequencies -- | 1492.5312 | 1497.0997 | 1498.9130 |
| Frequencies -- | 1502.5513 | 1505.0253 | 1505.5041 |
| Frequencies -- | 1506.8026 | 1514.8474 | 1517.1636 |
| Frequencies -- | 1574.0282 | 1580.5371 | 1585.5361 |
| Frequencies -- | 1596.2330 | 1597.1860 | 1602.8070 |
| Frequencies -- | 1620.0868 | 1622.3365 | 3008.9289 |
| Frequencies -- | 3009.6616 | 3011.3623 | 3012.0820 |
| Frequencies -- | 3013.2907 | 3016.2234 | 3039.2867 |
| Frequencies -- | 3096.9984 | 3101.3036 | 3102.8866 |
| Frequencies -- | 3104.4601 | 3112.2422 | 3121.7151 |
| Frequencies -- | 3138.1565 | 3146.6954 | 3149.4227 |
| Frequencies -- | 3156.1839 | 3160.3028 | 3161.7782 |
| Frequencies -- | 3173.2675 | 3199.2037 | 3203.4948 |
| Frequencies -- | 3206.8454 | 3218.0024 | 3230.2420 |



**Catalyst 7:**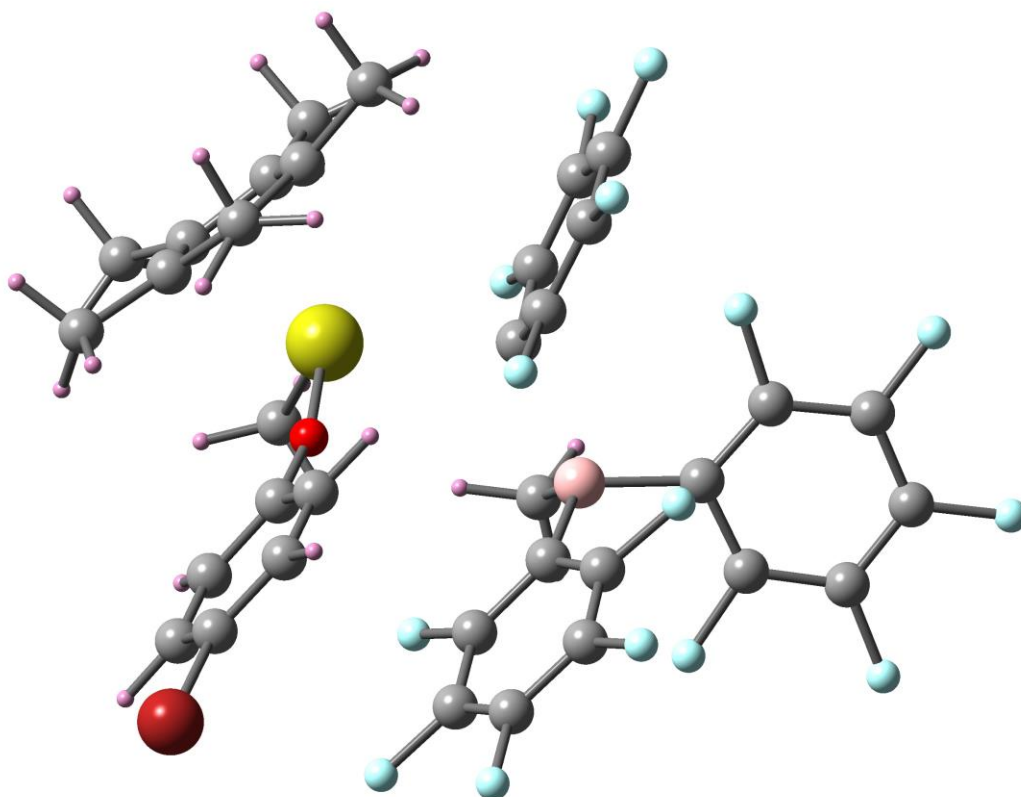

| <b>vacuum</b> | <b>toluene-like solvent</b> | <b>D3 dispersion</b> |
|---------------|-----------------------------|----------------------|
| -3054.9057635 | -3054.916401                | -0.56778672          |

Imaginary frequency corresponding to vibration along the reaction coordinate:  $-220\text{ cm}^{-1}$ .

|    |             |             |             |
|----|-------------|-------------|-------------|
| Ti | -0.82072300 | 2.22434100  | -0.77811400 |
| C  | -0.84684900 | 1.97377200  | -2.83494300 |
| H  | -0.70739500 | 0.88830300  | -2.93334000 |
| H  | -1.76086900 | 2.26200800  | -3.36784300 |
| H  | 0.01364500  | 2.51209900  | -3.26590200 |
| O  | -1.97192000 | 0.93022800  | -0.38167000 |
| C  | -3.06627100 | 0.14767500  | -0.05790600 |
| C  | -3.24925100 | -0.30657700 | 1.27087200  |
| C  | -3.98498000 | -0.21944300 | -1.07123300 |
| C  | -4.35952700 | -1.11321500 | 1.58827800  |
| C  | -5.09544000 | -1.02487100 | -0.75400100 |
| C  | -5.27974300 | -1.46060500 | 0.57581900  |
| H  | -4.49455700 | -1.46846100 | 2.60983900  |
| H  | -5.79554100 | -1.31416900 | -1.53755900 |
| C  | -0.58228200 | 4.33022600  | 0.56153200  |
| C  | -0.30400000 | 4.69282400  | -0.80928200 |
| C  | -1.93484300 | 3.82175600  | 0.62954200  |
| C  | -1.50092000 | 4.45628100  | -1.58257500 |
| C  | -2.50773600 | 3.90705000  | -0.69601600 |
| F  | 6.93725600  | -3.67733700 | 0.09283500  |
| C  | 5.75541200  | -2.98214700 | -0.11594300 |
| C  | 5.51447700  | -1.76218500 | 0.53205800  |

|   |             |             |             |
|---|-------------|-------------|-------------|
| C | 4.76926000  | -3.48447200 | -0.98116000 |
| C | 4.30517200  | -1.07485200 | 0.29981700  |
| F | 6.46443900  | -1.24091200 | 1.40327500  |
| C | 3.58252400  | -2.75451500 | -1.17673400 |
| F | 4.97403500  | -4.69407800 | -1.63411200 |
| C | 3.27737100  | -1.51169300 | -0.55744400 |
| F | 4.16703200  | 0.11498100  | 1.02711700  |
| F | 2.65856200  | -3.34882100 | -2.05135500 |
| B | 1.84472600  | -0.80171800 | -1.05171200 |
| C | 1.43833000  | 1.06804400  | -0.01364200 |
| C | 2.40459500  | 2.06845200  | -0.31146500 |
| C | 1.20108100  | 0.95220400  | 1.38520900  |
| C | 3.14217000  | 2.79167800  | 0.64057900  |
| F | 2.67367300  | 2.39590600  | -1.65140900 |
| C | 1.91262300  | 1.63133300  | 2.38794900  |
| F | 0.16131100  | 0.12816800  | 1.84565000  |
| C | 2.90793800  | 2.54899200  | 2.00549900  |
| F | 4.07168500  | 3.75843300  | 0.26804400  |
| F | 1.62503100  | 1.45837300  | 3.73754700  |
| F | 3.60293600  | 3.25890200  | 2.96527100  |
| C | 0.60366800  | -1.79138500 | -0.65068100 |
| C | -0.44706200 | -2.13934600 | -1.53094500 |
| C | 0.58082200  | -2.52930600 | 0.56078900  |
| C | -1.42555000 | -3.11427400 | -1.25859200 |
| C | -0.38211700 | -3.50154300 | 0.88665300  |
| C | -1.39708300 | -3.80343000 | -0.03650900 |
| F | 1.56291800  | -2.31083800 | 1.53289000  |
| F | -0.34169800 | -4.16430800 | 2.10805600  |
| F | -2.36323600 | -4.75167900 | 0.26215300  |
| F | -2.42579300 | -3.39248700 | -2.18476100 |
| F | -0.57681600 | -1.51170700 | -2.77719300 |
| C | 2.06712700  | -0.35665100 | -2.58779700 |
| H | 1.28932700  | 0.27827900  | -3.01250800 |
| H | 3.02883000  | 0.16071200  | -2.70794100 |
| H | 2.11114100  | -1.26529100 | -3.20845500 |
| C | 0.24054900  | 4.70986300  | 1.77084300  |
| H | -0.14781600 | 5.66537200  | 2.16571000  |
| H | 0.17173900  | 3.98349900  | 2.59001800  |
| H | 1.29701300  | 4.87473000  | 1.53758900  |
| C | 0.93484800  | 5.38427700  | -1.33354000 |
| H | 0.73811800  | 6.46431600  | -1.45064300 |
| H | 1.79396800  | 5.28213500  | -0.66177100 |
| H | 1.24042800  | 5.00546100  | -2.31906400 |
| C | -2.66415000 | 3.46988100  | 1.90598700  |
| H | -2.02305900 | 2.93835200  | 2.62382000  |
| H | -3.00966900 | 4.39247100  | 2.40429600  |
| H | -3.54884900 | 2.84826300  | 1.72542700  |
| C | -1.73582100 | 4.96450900  | -2.98396500 |
| H | -1.97670300 | 6.04128000  | -2.94175800 |
| H | -0.85305700 | 4.85543300  | -3.62762100 |
| H | -2.57764700 | 4.46418100  | -3.47875200 |
| C | -3.95176500 | 3.65583400  | -1.06247700 |
| H | -4.44065500 | 2.94972100  | -0.38146700 |
| H | -4.51695100 | 4.60294500  | -1.01278700 |
| H | -4.06343200 | 3.26624200  | -2.08348500 |
| H | -2.52333300 | -0.04733800 | 2.03918400  |
| H | -3.82319700 | 0.10802800  | -2.09754400 |

| Br             | -6.83060900 | -2.57672800 | 1.02170000 |
|----------------|-------------|-------------|------------|
| Frequencies -- | -219.6126   | 12.5360     | 15.1006    |
| Frequencies -- | 16.9388     | 20.1377     | 30.5524    |
| Frequencies -- | 33.5704     | 36.0661     | 40.0694    |
| Frequencies -- | 45.4829     | 47.4569     | 51.7297    |
| Frequencies -- | 54.5754     | 56.9030     | 63.6624    |
| Frequencies -- | 73.0155     | 90.8712     | 92.7902    |
| Frequencies -- | 94.6243     | 96.6639     | 100.1467   |
| Frequencies -- | 111.1314    | 113.6529    | 117.0482   |
| Frequencies -- | 121.3383    | 124.1271    | 126.8069   |
| Frequencies -- | 130.4067    | 134.6059    | 136.4612   |
| Frequencies -- | 143.4107    | 144.9019    | 150.0386   |
| Frequencies -- | 157.1734    | 163.8993    | 165.1636   |
| Frequencies -- | 171.8970    | 174.7125    | 179.7268   |
| Frequencies -- | 192.4643    | 201.7190    | 203.7498   |
| Frequencies -- | 215.6460    | 222.9071    | 232.4247   |
| Frequencies -- | 236.1054    | 241.2924    | 247.4781   |
| Frequencies -- | 263.7952    | 264.4330    | 265.7888   |
| Frequencies -- | 267.6956    | 268.2419    | 273.2260   |
| Frequencies -- | 274.9075    | 276.8666    | 278.2140   |
| Frequencies -- | 283.1487    | 288.2582    | 294.7019   |
| Frequencies -- | 297.7702    | 301.6056    | 302.2895   |
| Frequencies -- | 305.2338    | 308.3489    | 317.3104   |
| Frequencies -- | 319.5437    | 329.9726    | 334.2690   |
| Frequencies -- | 341.7532    | 371.6697    | 373.6475   |
| Frequencies -- | 375.2966    | 381.5956    | 385.1461   |
| Frequencies -- | 399.5332    | 408.5377    | 412.2059   |
| Frequencies -- | 422.7422    | 424.9764    | 431.7799   |
| Frequencies -- | 433.1830    | 434.4061    | 442.5132   |
| Frequencies -- | 450.9303    | 455.3462    | 458.0721   |
| Frequencies -- | 485.6513    | 507.2598    | 512.1845   |
| Frequencies -- | 529.3373    | 534.9265    | 540.5298   |
| Frequencies -- | 542.7546    | 551.8328    | 553.4463   |
| Frequencies -- | 573.4800    | 585.2551    | 592.8732   |
| Frequencies -- | 594.4851    | 604.4337    | 617.1305   |
| Frequencies -- | 628.3554    | 629.0769    | 638.2183   |
| Frequencies -- | 641.8530    | 645.3392    | 648.1988   |
| Frequencies -- | 674.2452    | 679.8545    | 692.8952   |
| Frequencies -- | 697.2334    | 710.9434    | 714.4460   |
| Frequencies -- | 716.8081    | 720.1774    | 737.4964   |
| Frequencies -- | 750.9208    | 782.3527    | 800.6679   |
| Frequencies -- | 806.8859    | 822.3743    | 830.6910   |
| Frequencies -- | 835.0818    | 890.3569    | 898.9308   |
| Frequencies -- | 907.6242    | 918.8999    | 923.1553   |
| Frequencies -- | 957.7772    | 965.1167    | 970.8465   |
| Frequencies -- | 972.2584    | 987.0541    | 992.2456   |
| Frequencies -- | 996.5568    | 1016.2878   | 1036.3795  |
| Frequencies -- | 1038.2838   | 1040.6096   | 1041.1851  |
| Frequencies -- | 1043.8407   | 1046.3913   | 1048.0998  |
| Frequencies -- | 1057.1992   | 1058.9303   | 1064.9060  |
| Frequencies -- | 1084.8709   | 1086.0301   | 1087.7403  |
| Frequencies -- | 1116.0697   | 1123.9824   | 1171.9831  |
| Frequencies -- | 1175.4580   | 1176.1288   | 1190.0948  |
| Frequencies -- | 1193.3865   | 1213.8498   | 1222.1383  |
| Frequencies -- | 1243.2468   | 1248.4505   | 1308.5089  |
| Frequencies -- | 1310.7892   | 1326.4376   | 1334.2157  |
| Frequencies -- | 1341.9068   | 1348.8969   | 1356.7093  |
| Frequencies -- | 1371.8343   | 1380.3921   | 1407.8953  |
| Frequencies -- | 1411.4443   | 1414.5624   | 1415.8347  |
| Frequencies -- | 1421.6293   | 1423.6752   | 1426.7972  |
| Frequencies -- | 1428.7201   | 1430.9446   | 1431.9197  |
| Frequencies -- | 1436.4299   | 1448.5153   | 1450.5628  |

|                |           |           |           |
|----------------|-----------|-----------|-----------|
| Frequencies -- | 1456.0670 | 1456.4460 | 1462.3435 |
| Frequencies -- | 1470.6170 | 1473.1179 | 1479.8938 |
| Frequencies -- | 1481.0290 | 1490.8778 | 1491.8590 |
| Frequencies -- | 1493.5148 | 1497.3813 | 1500.5531 |
| Frequencies -- | 1502.3931 | 1504.8226 | 1505.1533 |
| Frequencies -- | 1507.0160 | 1515.4003 | 1518.4550 |
| Frequencies -- | 1574.1390 | 1576.4956 | 1585.8925 |
| Frequencies -- | 1596.4255 | 1596.7277 | 1597.2536 |
| Frequencies -- | 1619.3761 | 1622.7095 | 3008.8792 |
| Frequencies -- | 3009.4047 | 3011.9259 | 3012.2522 |
| Frequencies -- | 3013.5748 | 3015.1666 | 3039.1465 |
| Frequencies -- | 3095.8279 | 3102.0974 | 3102.9583 |
| Frequencies -- | 3105.2717 | 3110.0596 | 3121.5177 |
| Frequencies -- | 3137.8675 | 3147.5992 | 3149.6357 |
| Frequencies -- | 3155.9016 | 3160.3506 | 3160.6978 |
| Frequencies -- | 3170.7997 | 3195.7765 | 3199.7157 |
| Frequencies -- | 3204.0985 | 3214.1551 | 3226.0303 |

**Catalyst 8:**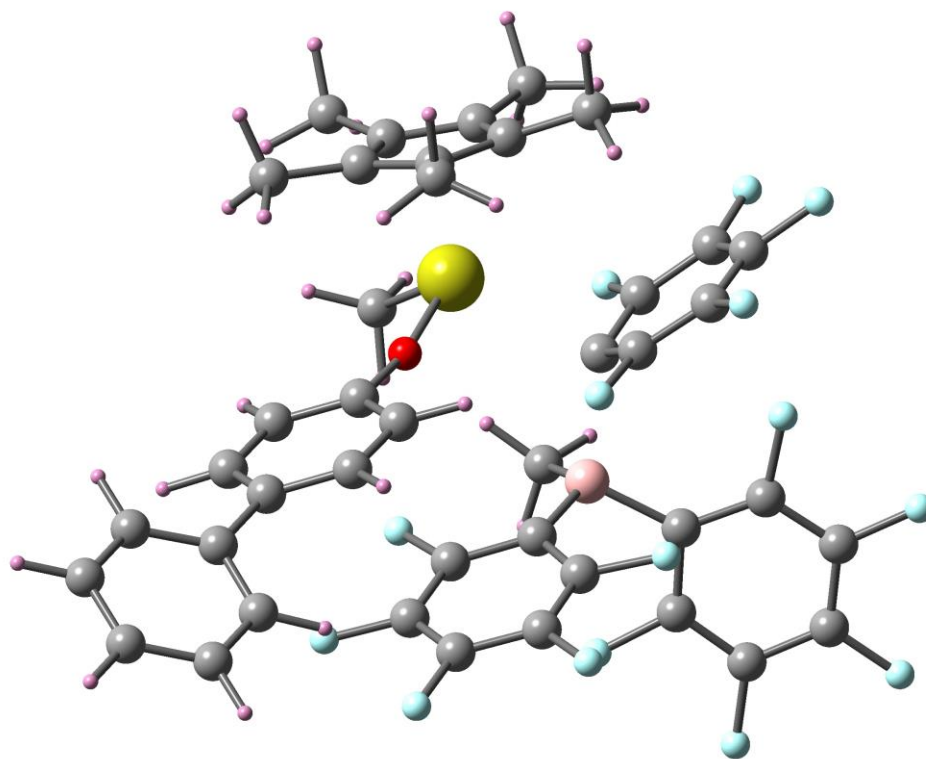

| <b>vacuum</b> | <b>toluene-like solvent</b> | <b>D3 dispersion</b> |
|---------------|-----------------------------|----------------------|
| -3273.2985885 | -3273.3102219               | -0.63421510          |

Imaginary frequency corresponding to vibration along the reaction coordinate:  $-224 \text{ cm}^{-1}$ .

|    |             |             |             |
|----|-------------|-------------|-------------|
| Ti | -0.21542400 | 2.44727700  | -0.74967900 |
| C  | -0.23485300 | 2.27237200  | -2.81705900 |
| H  | -0.27536400 | 1.18280500  | -2.95490700 |
| H  | -1.08540200 | 2.72416800  | -3.34239800 |
| H  | 0.70528200  | 2.67662200  | -3.22669300 |
| O  | -1.58712400 | 1.37277000  | -0.42808600 |
| C  | -2.80944900 | 0.77943400  | -0.15343700 |
| C  | -3.07114700 | 0.24655900  | 1.13156700  |
| C  | -3.78297200 | 0.67363500  | -1.17593700 |
| C  | -4.30096300 | -0.38680200 | 1.38205400  |
| C  | -5.00952900 | 0.04259600  | -0.90659400 |
| C  | -5.29876900 | -0.50433900 | 0.37450400  |
| H  | -4.49302000 | -0.78086700 | 2.38092200  |
| H  | -5.73244400 | -0.06545300 | -1.71610600 |
| C  | 0.30315000  | 4.40931900  | 0.70734800  |
| C  | 0.74904700  | 4.77438700  | -0.61859200 |
| C  | -1.12253000 | 4.17043300  | 0.65508500  |
| C  | -0.40733400 | 4.80215400  | -1.48328100 |
| C  | -1.56455700 | 4.41945600  | -0.69942000 |
| F  | 6.30985000  | -4.83040000 | 0.04837700  |
| C  | 5.28492300  | -3.91797400 | -0.15441400 |
| C  | 5.27296300  | -2.68846600 | 0.51986900  |

|   |             |             |             |
|---|-------------|-------------|-------------|
| C | 4.23259200  | -4.20418700 | -1.03983900 |
| C | 4.21945000  | -1.77814200 | 0.29503600  |
| F | 6.29420500  | -2.37752800 | 1.41079500  |
| C | 3.20909100  | -3.25731100 | -1.22721500 |
| F | 4.21118800  | -5.41641500 | -1.71943400 |
| C | 3.13722500  | -1.99406800 | -0.57927900 |
| F | 4.30261000  | -0.59832700 | 1.04602300  |
| F | 2.20261500  | -3.64292400 | -2.12764900 |
| B | 1.86967200  | -1.01673300 | -1.06572500 |
| C | 1.78739200  | 0.87713400  | 0.03329400  |
| C | 2.92784300  | 1.68883200  | -0.21360700 |
| C | 1.50620900  | 0.75643500  | 1.42264700  |
| C | 3.76547000  | 2.23289300  | 0.77450100  |
| F | 3.28164000  | 2.00271800  | -1.53736800 |
| C | 2.31164800  | 1.25396900  | 2.46005200  |
| F | 0.32096000  | 0.12639600  | 1.83588100  |
| C | 3.46416200  | 1.98858400  | 2.12602300  |
| F | 4.86467200  | 3.02335700  | 0.45108500  |
| F | 1.97312800  | 1.08521800  | 3.79852100  |
| F | 4.25853800  | 2.52400500  | 3.12202000  |
| C | 0.46130600  | -1.76869300 | -0.70583500 |
| C | -0.62097300 | -1.89641000 | -1.60746600 |
| C | 0.28388900  | -2.51580400 | 0.48704000  |
| C | -1.76591500 | -2.68122600 | -1.37130500 |
| C | -0.84824200 | -3.29735000 | 0.77874000  |
| C | -1.88514300 | -3.38654100 | -0.16421100 |
| F | 1.27374800  | -2.50358300 | 1.47573000  |
| F | -0.95502700 | -3.97815100 | 1.98692100  |
| F | -3.01843200 | -4.14113900 | 0.10455700  |
| F | -2.78301400 | -2.75479100 | -2.31693300 |
| F | -0.60968200 | -1.22873500 | -2.83859600 |
| C | 2.19671200  | -0.56708900 | -2.58019500 |
| H | 1.55936100  | 0.21865100  | -2.98595200 |
| H | 3.24031000  | -0.23567000 | -2.67045200 |
| H | 2.07840100  | -1.44526200 | -3.23446300 |
| C | 1.09104100  | 4.54846000  | 1.98929600  |
| H | 0.86701100  | 5.53547600  | 2.43084900  |
| H | 0.82440200  | 3.79942100  | 2.74555200  |
| H | 2.17347800  | 4.51348800  | 1.83307700  |
| C | 2.12754000  | 5.25083200  | -1.02131000 |
| H | 2.10877600  | 6.34143700  | -1.18969000 |
| H | 2.88366800  | 5.05490200  | -0.25355400 |
| H | 2.47820700  | 4.78931100  | -1.95553100 |
| C | -2.00558700 | 3.90969700  | 1.85373700  |
| H | -2.94658600 | 3.41727500  | 1.58201000  |
| H | -1.51071500 | 3.28521400  | 2.61064300  |
| H | -2.26413200 | 4.86587800  | 2.34171600  |
| C | -0.42892200 | 5.39629900  | -2.87023800 |
| H | -0.48431200 | 6.49650200  | -2.79195600 |
| H | 0.47588900  | 5.15826600  | -3.44514500 |
| H | -1.29637200 | 5.06955600  | -3.45696500 |
| C | -2.99801500 | 4.46982300  | -1.17462600 |
| H | -3.66287200 | 3.83937200  | -0.57278000 |
| H | -3.37469100 | 5.50524500  | -1.10200600 |
| H | -3.10430900 | 4.16190000  | -2.22398400 |
| H | -2.31602900 | 0.31933200  | 1.91212400  |
| H | -3.56436900 | 1.05364100  | -2.17355900 |

|   |              |             |             |
|---|--------------|-------------|-------------|
| C | -6.59594000  | -1.19467000 | 0.64648000  |
| C | -6.64327700  | -2.37515500 | 1.43815400  |
| C | -7.81813400  | -0.69754900 | 0.11610600  |
| C | -7.86498600  | -3.03151500 | 1.69079100  |
| H | -5.71812700  | -2.80405700 | 1.82687300  |
| C | -9.04104200  | -1.35132200 | 0.37029500  |
| H | -7.81765200  | 0.22014400  | -0.47538500 |
| C | -9.07088200  | -2.52247400 | 1.15957300  |
| H | -7.87296200  | -3.94464300 | 2.29043500  |
| H | -9.96795600  | -0.94429000 | -0.04072600 |
| H | -10.01743000 | -3.03153900 | 1.35498100  |

|                |           |          |          |
|----------------|-----------|----------|----------|
| Frequencies -- | -223.9969 | 11.8255  | 13.1201  |
| Frequencies -- | 16.1785   | 21.7740  | 27.5120  |
| Frequencies -- | 31.5479   | 33.5658  | 35.1524  |
| Frequencies -- | 40.9250   | 41.4340  | 48.6493  |
| Frequencies -- | 53.2484   | 54.5497  | 60.9382  |
| Frequencies -- | 68.1621   | 70.7782  | 77.2432  |
| Frequencies -- | 88.5249   | 90.3576  | 95.0956  |
| Frequencies -- | 102.0133  | 105.3847 | 111.3214 |
| Frequencies -- | 113.6520  | 114.2023 | 118.9638 |
| Frequencies -- | 121.3450  | 125.2920 | 128.0433 |
| Frequencies -- | 131.1615  | 137.2548 | 145.7116 |
| Frequencies -- | 146.3560  | 149.7410 | 157.3389 |
| Frequencies -- | 163.9659  | 165.1901 | 167.6870 |
| Frequencies -- | 173.8874  | 187.1873 | 188.2510 |
| Frequencies -- | 199.7531  | 202.9015 | 211.1775 |
| Frequencies -- | 218.7036  | 223.5677 | 236.6830 |
| Frequencies -- | 238.1414  | 249.0752 | 264.0207 |
| Frequencies -- | 265.4271  | 267.1481 | 267.4527 |
| Frequencies -- | 270.9930  | 275.1722 | 277.5583 |
| Frequencies -- | 279.7999  | 280.3092 | 285.2980 |
| Frequencies -- | 291.3066  | 291.7913 | 296.6860 |
| Frequencies -- | 301.2790  | 302.4512 | 304.3329 |
| Frequencies -- | 307.1278  | 316.9749 | 319.0076 |
| Frequencies -- | 329.0217  | 333.0323 | 334.9058 |
| Frequencies -- | 352.2428  | 370.6155 | 375.6414 |
| Frequencies -- | 381.9714  | 383.5375 | 394.8698 |
| Frequencies -- | 406.1402  | 409.0611 | 415.3231 |
| Frequencies -- | 422.8784  | 423.6757 | 425.1577 |
| Frequencies -- | 431.5723  | 434.1615 | 434.4270 |
| Frequencies -- | 442.6898  | 450.8947 | 455.0714 |
| Frequencies -- | 463.3376  | 485.6664 | 502.7081 |
| Frequencies -- | 515.1305  | 529.5282 | 535.5152 |
| Frequencies -- | 539.5570  | 542.8930 | 551.2813 |
| Frequencies -- | 552.4833  | 557.3277 | 572.7030 |
| Frequencies -- | 584.6956  | 590.9715 | 591.5963 |
| Frequencies -- | 600.9259  | 606.2317 | 621.7897 |
| Frequencies -- | 629.2212  | 637.2843 | 637.8162 |
| Frequencies -- | 639.8597  | 641.9915 | 644.4668 |
| Frequencies -- | 649.1177  | 673.3852 | 687.1235 |
| Frequencies -- | 692.6271  | 706.8699 | 715.1331 |
| Frequencies -- | 717.3468  | 720.3951 | 722.8887 |
| Frequencies -- | 737.9069  | 748.7971 | 750.6983 |
| Frequencies -- | 773.6894  | 782.3620 | 799.4997 |
| Frequencies -- | 806.9280  | 828.2427 | 837.1484 |
| Frequencies -- | 852.7787  | 858.7602 | 890.1245 |
| Frequencies -- | 898.8919  | 907.7908 | 920.0101 |
| Frequencies -- | 926.2595  | 932.3684 | 964.1712 |
| Frequencies -- | 966.4192  | 970.5428 | 978.9442 |
| Frequencies -- | 985.7075  | 986.0876 | 990.6317 |

|                |           |           |           |
|----------------|-----------|-----------|-----------|
| Frequencies -- | 996.7271  | 999.7778  | 1005.8841 |
| Frequencies -- | 1022.8817 | 1035.8370 | 1038.8579 |
| Frequencies -- | 1040.3987 | 1041.1978 | 1045.1293 |
| Frequencies -- | 1046.5523 | 1048.1851 | 1049.6766 |
| Frequencies -- | 1057.6900 | 1059.1926 | 1059.7579 |
| Frequencies -- | 1084.5180 | 1086.2842 | 1086.4344 |
| Frequencies -- | 1094.8433 | 1123.6332 | 1130.5070 |
| Frequencies -- | 1171.8799 | 1174.9407 | 1175.6159 |
| Frequencies -- | 1183.4476 | 1184.1107 | 1199.3812 |
| Frequencies -- | 1210.2990 | 1213.7957 | 1221.7439 |
| Frequencies -- | 1243.1324 | 1247.6379 | 1301.0760 |
| Frequencies -- | 1310.7812 | 1315.4364 | 1326.5740 |
| Frequencies -- | 1327.5188 | 1335.9163 | 1342.6515 |
| Frequencies -- | 1356.4560 | 1357.0751 | 1369.9438 |
| Frequencies -- | 1374.4682 | 1379.1728 | 1411.6843 |
| Frequencies -- | 1414.0117 | 1414.8341 | 1422.0029 |
| Frequencies -- | 1423.4741 | 1424.7201 | 1426.1794 |
| Frequencies -- | 1428.2249 | 1430.2427 | 1432.3151 |
| Frequencies -- | 1435.5507 | 1447.9282 | 1450.2088 |
| Frequencies -- | 1451.0763 | 1451.3846 | 1455.8836 |
| Frequencies -- | 1462.0781 | 1470.5802 | 1472.9742 |
| Frequencies -- | 1480.9490 | 1488.5800 | 1491.6019 |
| Frequencies -- | 1492.8208 | 1495.3555 | 1497.7864 |
| Frequencies -- | 1501.3753 | 1502.8955 | 1505.3658 |
| Frequencies -- | 1505.6864 | 1507.9267 | 1515.2592 |
| Frequencies -- | 1516.6772 | 1519.7791 | 1569.9169 |
| Frequencies -- | 1574.2442 | 1586.0085 | 1597.0112 |
| Frequencies -- | 1598.2407 | 1598.6229 | 1618.1963 |
| Frequencies -- | 1619.7125 | 1622.4263 | 1624.4538 |
| Frequencies -- | 3008.6593 | 3009.4840 | 3010.5201 |
| Frequencies -- | 3011.8678 | 3015.0865 | 3016.0315 |
| Frequencies -- | 3037.9080 | 3100.4449 | 3101.4523 |
| Frequencies -- | 3101.5147 | 3103.6983 | 3110.3865 |
| Frequencies -- | 3120.3734 | 3137.3743 | 3147.0796 |
| Frequencies -- | 3149.8719 | 3154.7045 | 3154.9161 |
| Frequencies -- | 3157.0804 | 3161.9634 | 3162.7307 |
| Frequencies -- | 3172.1466 | 3174.1694 | 3180.2836 |
| Frequencies -- | 3183.7338 | 3185.2893 | 3195.8448 |
| Frequencies -- | 3206.3646 | 3211.0048 | 3223.0959 |



**Catalyst 9:**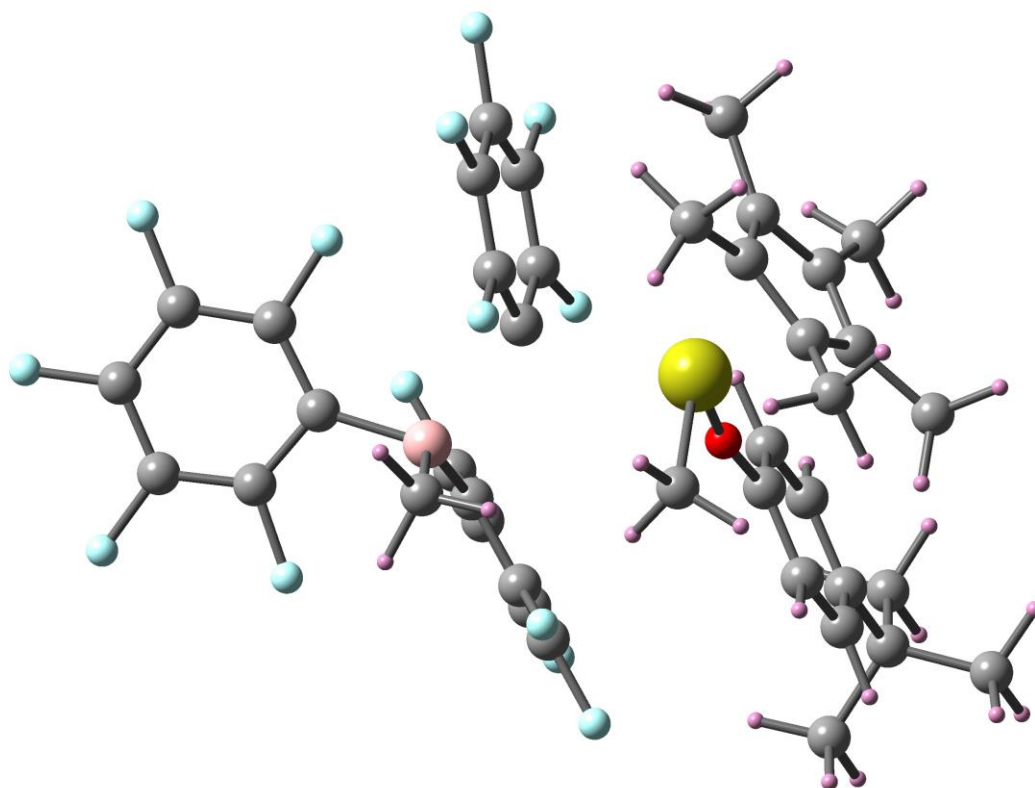

| <b>vacuum</b> | <b>toluene-like solvent</b> | <b>D3 dispersion</b> |
|---------------|-----------------------------|----------------------|
| -3199.5049347 | -3199.5141791               | -0.63045252          |

Imaginary frequency corresponding to vibration along the reaction coordinate:  $-223 \text{ cm}^{-1}$ .

|    |             |             |             |
|----|-------------|-------------|-------------|
| Ti | -0.86090300 | 2.23892000  | -0.76331100 |
| C  | -0.89866900 | 1.97757000  | -2.82113900 |
| H  | -0.77296600 | 0.89041800  | -2.91990500 |
| H  | -1.81194600 | 2.27529400  | -3.35025300 |
| H  | -0.03412100 | 2.50560900  | -3.25707400 |
| O  | -2.00634500 | 0.95327800  | -0.35354000 |
| C  | -3.09622000 | 0.16029900  | -0.02222600 |
| C  | -3.27494600 | -0.29736300 | 1.30150500  |
| C  | -4.01597500 | -0.22015000 | -1.02821400 |
| C  | -4.37037400 | -1.12980200 | 1.60918400  |
| C  | -5.10093300 | -1.04922800 | -0.69837700 |
| C  | -5.31187200 | -1.53047200 | 0.62509900  |
| H  | -4.46945100 | -1.47287300 | 2.63727400  |
| H  | -5.78340500 | -1.33615200 | -1.49849000 |
| C  | -0.60295600 | 4.34962700  | 0.56768300  |
| C  | -0.33214400 | 4.70980100  | -0.80498800 |
| C  | -1.95685600 | 3.84610000  | 0.64505700  |
| C  | -1.53398100 | 4.47484000  | -1.57056000 |
| C  | -2.53729300 | 3.93018000  | -0.67714200 |
| F  | 6.90179200  | -3.69556900 | 0.05785500  |
| C  | 5.71961800  | -2.99858600 | -0.14438900 |
| C  | 5.48782800  | -1.77396300 | 0.49820900  |

|   |             |             |             |
|---|-------------|-------------|-------------|
| C | 4.72444600  | -3.50380400 | -0.99746000 |
| C | 4.27819000  | -1.08462000 | 0.27322000  |
| F | 6.44759100  | -1.25005000 | 1.35714200  |
| C | 3.53785000  | -2.77193700 | -1.18640700 |
| F | 4.92040500  | -4.71798400 | -1.64509100 |
| C | 3.24162400  | -1.52483400 | -0.57173500 |
| F | 4.15007800  | 0.11000300  | 0.99348500  |
| F | 2.60433100  | -3.36819200 | -2.04968900 |
| B | 1.80739800  | -0.81523400 | -1.05752900 |
| C | 1.40971600  | 1.07874200  | -0.01540500 |
| C | 2.37647600  | 2.07256900  | -0.32911700 |
| C | 1.19091800  | 0.96616000  | 1.38594200  |
| C | 3.12903300  | 2.79630200  | 0.61083800  |
| F | 2.63002200  | 2.39443000  | -1.67416800 |
| C | 1.91775000  | 1.64603400  | 2.37746500  |
| F | 0.15553000  | 0.14557400  | 1.86189500  |
| C | 2.91076600  | 2.55934600  | 1.97941400  |
| F | 4.05832100  | 3.75820800  | 0.22354500  |
| F | 1.64825900  | 1.47738500  | 3.73183500  |
| F | 3.62086600  | 3.27007200  | 2.92836900  |
| C | 0.56515700  | -1.79400500 | -0.63852100 |
| C | -0.49231500 | -2.14551100 | -1.50969900 |
| C | 0.54740700  | -2.52000800 | 0.58019100  |
| C | -1.47209300 | -3.11485300 | -1.22224500 |
| C | -0.41934500 | -3.48264100 | 0.92258300  |
| C | -1.43978700 | -3.78892200 | 0.00759400  |
| F | 1.53918800  | -2.29983100 | 1.54176400  |
| F | -0.37707500 | -4.13250400 | 2.15124700  |
| F | -2.41094800 | -4.72961800 | 0.32305600  |
| F | -2.47610800 | -3.40423100 | -2.14086800 |
| F | -0.62496900 | -1.53114000 | -2.76136300 |
| C | 2.01473900  | -0.36896000 | -2.59381400 |
| H | 1.22960800  | 0.26263500  | -3.00988000 |
| H | 2.97323700  | 0.15214900  | -2.72265500 |
| H | 2.05637800  | -1.27766600 | -3.21497200 |
| C | 0.23048400  | 4.72417200  | 1.77155700  |
| H | -0.15689300 | 5.67519000  | 2.17799200  |
| H | 0.17288600  | 3.99109400  | 2.58570100  |
| H | 1.28406400  | 4.89404500  | 1.52844700  |
| C | 0.90588700  | 5.39602400  | -1.33838900 |
| H | 0.71351900  | 6.47694800  | -1.45520700 |
| H | 1.76917300  | 5.29039100  | -0.67237800 |
| H | 1.20309400  | 5.01470200  | -2.32556300 |
| C | -2.67990000 | 3.49683900  | 1.92585400  |
| H | -3.55530100 | 2.86022200  | 1.75272400  |
| H | -2.03002900 | 2.98074700  | 2.64699900  |
| H | -3.03730800 | 4.41957500  | 2.41597800  |
| C | -1.77397100 | 4.97845600  | -2.97290000 |
| H | -1.99339900 | 6.06004500  | -2.93625500 |
| H | -0.90044500 | 4.84748700  | -3.62524200 |
| H | -2.63052000 | 4.49074400  | -3.45488300 |
| C | -3.98376500 | 3.67837700  | -1.03408200 |
| H | -4.46540200 | 2.96817300  | -0.35209700 |
| H | -4.55055200 | 4.62426300  | -0.97783000 |
| H | -4.10155400 | 3.29040300  | -2.05499900 |
| H | -2.55459800 | -0.02410100 | 2.07102900  |
| H | -3.86642400 | 0.11546900  | -2.05429300 |

|   |             |             |             |
|---|-------------|-------------|-------------|
| C | -6.50869000 | -2.47422600 | 0.92940300  |
| C | -6.34724600 | -3.79072000 | 0.09835600  |
| H | -7.18266300 | -4.47666900 | 0.31068900  |
| H | -6.34002400 | -3.59657100 | -0.98393700 |
| H | -5.40780500 | -4.30454800 | 0.35198500  |
| C | -6.59386900 | -2.86320200 | 2.43453300  |
| H | -6.72489200 | -1.98151200 | 3.08136300  |
| H | -7.46073000 | -3.52201900 | 2.59481000  |
| H | -5.69987200 | -3.41130900 | 2.76867000  |
| C | -7.84916700 | -1.76988900 | 0.53781900  |
| H | -7.99167300 | -0.84372700 | 1.11679300  |
| H | -7.88357200 | -1.50996200 | -0.53002400 |
| H | -8.70145800 | -2.43622300 | 0.74499700  |

|                |           |          |          |
|----------------|-----------|----------|----------|
| Frequencies -- | -222.9409 | 13.8786  | 16.4921  |
| Frequencies -- | 17.5608   | 24.3742  | 28.4481  |
| Frequencies -- | 30.6435   | 35.9593  | 37.9025  |
| Frequencies -- | 44.5009   | 47.3333  | 50.3960  |
| Frequencies -- | 54.6676   | 56.2637  | 61.4715  |
| Frequencies -- | 65.3422   | 73.3074  | 87.0741  |
| Frequencies -- | 90.2965   | 92.2023  | 94.7313  |
| Frequencies -- | 99.6880   | 111.1057 | 112.5502 |
| Frequencies -- | 115.9459  | 118.9896 | 123.1045 |
| Frequencies -- | 126.8103  | 129.1120 | 133.1424 |
| Frequencies -- | 136.4553  | 142.0362 | 145.3051 |
| Frequencies -- | 149.8819  | 157.3688 | 163.5262 |
| Frequencies -- | 165.6151  | 169.6587 | 172.2073 |
| Frequencies -- | 176.6294  | 182.7272 | 196.3266 |
| Frequencies -- | 202.2238  | 207.8042 | 217.6869 |
| Frequencies -- | 223.6922  | 225.2667 | 231.1918 |
| Frequencies -- | 235.6037  | 245.3650 | 257.2369 |
| Frequencies -- | 264.1625  | 265.0101 | 266.4954 |
| Frequencies -- | 267.8132  | 272.2981 | 272.9492 |
| Frequencies -- | 275.2773  | 276.6658 | 277.8697 |
| Frequencies -- | 284.1273  | 288.4119 | 294.7811 |
| Frequencies -- | 297.3997  | 301.1289 | 301.5936 |
| Frequencies -- | 303.9993  | 304.8470 | 308.4323 |
| Frequencies -- | 317.1327  | 318.3969 | 319.9530 |
| Frequencies -- | 329.8294  | 334.4202 | 337.8859 |
| Frequencies -- | 348.5922  | 370.8927 | 372.1571 |
| Frequencies -- | 374.9544  | 381.7004 | 384.3778 |
| Frequencies -- | 394.5286  | 408.2815 | 412.8205 |
| Frequencies -- | 419.1034  | 422.8054 | 424.7750 |
| Frequencies -- | 431.5672  | 432.9318 | 434.1729 |
| Frequencies -- | 441.9949  | 450.5906 | 454.9477 |
| Frequencies -- | 455.6557  | 478.8280 | 485.3037 |
| Frequencies -- | 508.9040  | 529.8606 | 535.4900 |
| Frequencies -- | 540.3540  | 542.5867 | 551.6479 |
| Frequencies -- | 553.6530  | 555.3624 | 558.6519 |
| Frequencies -- | 572.6808  | 585.5454 | 592.5683 |
| Frequencies -- | 595.0750  | 604.9828 | 620.3749 |
| Frequencies -- | 628.3167  | 637.8000 | 639.4390 |
| Frequencies -- | 641.9680  | 645.0356 | 648.1260 |
| Frequencies -- | 673.0138  | 692.1134 | 694.3599 |
| Frequencies -- | 714.0433  | 716.6836 | 719.7380 |
| Frequencies -- | 721.6774  | 735.0220 | 737.5610 |
| Frequencies -- | 751.4966  | 782.2957 | 800.6800 |
| Frequencies -- | 807.1618  | 831.3195 | 831.8901 |
| Frequencies -- | 833.7376  | 844.8032 | 889.7135 |
| Frequencies -- | 898.5708  | 907.6014 | 918.2670 |
| Frequencies -- | 925.8975  | 931.4348 | 935.3249 |

|                |           |           |           |
|----------------|-----------|-----------|-----------|
| Frequencies -- | 958.2986  | 965.2909  | 970.2626  |
| Frequencies -- | 971.1926  | 984.2519  | 986.5808  |
| Frequencies -- | 992.0658  | 996.6289  | 1022.6348 |
| Frequencies -- | 1035.4333 | 1038.6928 | 1038.8842 |
| Frequencies -- | 1040.8683 | 1042.0727 | 1043.6442 |
| Frequencies -- | 1044.6028 | 1047.0475 | 1048.9245 |
| Frequencies -- | 1057.4492 | 1059.2701 | 1084.9997 |
| Frequencies -- | 1085.9227 | 1087.9085 | 1121.5911 |
| Frequencies -- | 1124.0475 | 1132.0577 | 1172.1211 |
| Frequencies -- | 1174.4527 | 1176.3066 | 1191.0830 |
| Frequencies -- | 1202.3807 | 1213.9128 | 1216.6137 |
| Frequencies -- | 1221.3700 | 1223.2120 | 1244.6259 |
| Frequencies -- | 1248.5137 | 1276.0150 | 1310.9541 |
| Frequencies -- | 1326.6347 | 1327.6504 | 1335.4026 |
| Frequencies -- | 1341.9419 | 1351.4083 | 1356.9990 |
| Frequencies -- | 1371.5028 | 1379.7991 | 1397.6367 |
| Frequencies -- | 1400.9061 | 1411.5582 | 1414.5770 |
| Frequencies -- | 1415.6571 | 1421.7683 | 1422.4960 |
| Frequencies -- | 1424.0366 | 1426.5229 | 1427.3379 |
| Frequencies -- | 1428.8492 | 1431.1083 | 1432.2286 |
| Frequencies -- | 1436.5655 | 1448.0449 | 1450.7473 |
| Frequencies -- | 1456.2652 | 1458.2024 | 1462.9452 |
| Frequencies -- | 1470.0014 | 1472.9671 | 1481.0666 |
| Frequencies -- | 1483.5203 | 1488.4807 | 1491.0366 |
| Frequencies -- | 1491.7009 | 1492.1365 | 1493.0392 |
| Frequencies -- | 1497.4196 | 1499.5107 | 1500.5791 |
| Frequencies -- | 1502.1984 | 1504.4584 | 1505.1146 |
| Frequencies -- | 1507.3967 | 1508.6741 | 1514.4881 |
| Frequencies -- | 1515.5810 | 1518.7062 | 1521.9733 |
| Frequencies -- | 1574.7300 | 1577.9905 | 1585.9037 |
| Frequencies -- | 1596.9799 | 1598.3789 | 1617.5344 |
| Frequencies -- | 1619.0357 | 1622.5931 | 3007.5666 |
| Frequencies -- | 3007.7287 | 3008.3186 | 3010.9068 |
| Frequencies -- | 3011.2323 | 3011.2725 | 3012.6239 |
| Frequencies -- | 3014.8095 | 3016.9046 | 3037.7970 |
| Frequencies -- | 3095.4402 | 3101.2953 | 3102.4513 |
| Frequencies -- | 3104.2652 | 3108.4198 | 3109.3246 |
| Frequencies -- | 3113.4088 | 3116.4853 | 3120.7143 |
| Frequencies -- | 3121.5163 | 3126.4305 | 3130.3902 |
| Frequencies -- | 3137.1297 | 3147.0263 | 3149.4506 |
| Frequencies -- | 3155.6121 | 3159.2818 | 3159.8211 |
| Frequencies -- | 3169.8261 | 3181.5308 | 3201.5320 |
| Frequencies -- | 3204.1073 | 3204.5717 | 3221.5297 |

**Catalyst 10:**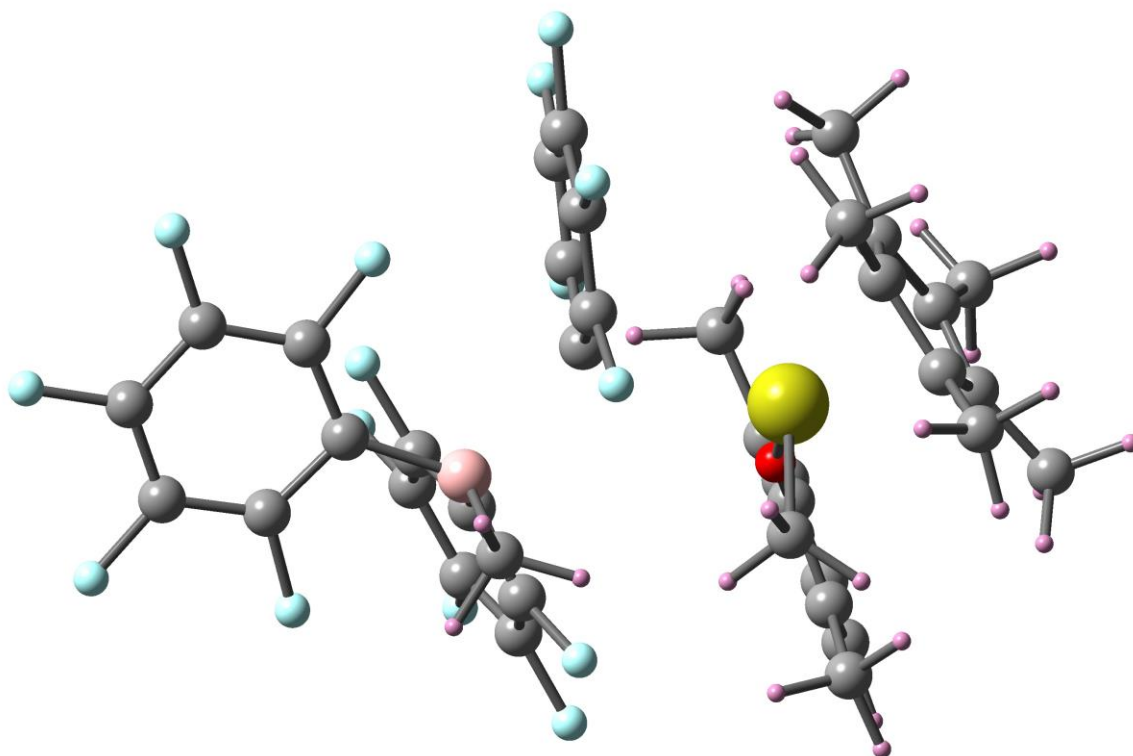

| <b>vacuum</b> | <b>toluene-like solvent</b> | <b>D3 dispersion</b> |
|---------------|-----------------------------|----------------------|
| -3120.9240937 | -3120.933983                | -0.59515968          |

Imaginary frequency corresponding to vibration along the reaction coordinate:  $-240\text{ cm}^{-1}$ .

|    |             |             |             |
|----|-------------|-------------|-------------|
| Ti | 2.29154100  | -0.92115900 | -0.58603900 |
| C  | 2.08121300  | -0.70040100 | -2.63045900 |
| H  | 1.45174300  | 0.19670200  | -2.70286200 |
| H  | 2.98245800  | -0.55956900 | -3.23757500 |
| H  | 1.52916200  | -1.58371000 | -2.98891400 |
| O  | 2.61325500  | 0.77141100  | -0.11961600 |
| C  | 3.18509500  | 1.98544000  | 0.28652300  |
| C  | 3.15713100  | 2.35578800  | 1.66661100  |
| C  | 3.76284900  | 2.83490800  | -0.71006200 |
| C  | 3.76105000  | 3.58284200  | 2.03227600  |
| C  | 4.35003300  | 4.04813200  | -0.28298000 |
| C  | 4.35886500  | 4.42310300  | 1.07482800  |
| H  | 3.74738400  | 3.88079700  | 3.08260400  |
| H  | 4.78920800  | 4.71043100  | -1.03104800 |
| C  | 2.97524800  | -3.32744200 | -0.43987600 |
| C  | 3.79185800  | -2.71737200 | -1.45908400 |
| C  | 3.26517900  | -2.66866300 | 0.82001500  |
| C  | 4.58455500  | -1.67867000 | -0.83568100 |
| C  | 4.27715300  | -1.66582500 | 0.57640700  |
| F  | -7.71802600 | -0.08769100 | -0.28328300 |
| C  | -6.33802600 | -0.03463700 | -0.41350100 |
| C  | -5.52779400 | -1.05426400 | 0.10733200  |

|   |             |             |             |
|---|-------------|-------------|-------------|
| C | -5.71956300 | 1.04213300  | -1.07070100 |
| C | -4.12696200 | -0.97862000 | -0.03900600 |
| F | -6.10901200 | -2.12960900 | 0.76952300  |
| C | -4.31806400 | 1.06525600  | -1.18872400 |
| F | -6.49396500 | 2.07006200  | -1.59540900 |
| C | -3.44136800 | 0.06699100  | -0.68576000 |
| F | -3.42229700 | -2.04029300 | 0.53990100  |
| F | -3.79162700 | 2.18336000  | -1.85665900 |
| B | -1.83402400 | 0.28707100  | -1.05782700 |
| C | -0.50113700 | -1.30723200 | -0.11528900 |
| C | -0.76337200 | -2.59340900 | -0.65084500 |
| C | -0.48697400 | -1.30975900 | 1.30130100  |
| C | -1.08208800 | -3.73528200 | 0.10407500  |
| F | -0.70683700 | -2.79992100 | -2.04307700 |
| C | -0.79061100 | -2.41071300 | 2.12083900  |
| F | -0.11473400 | -0.13804500 | 1.98584600  |
| C | -1.10365600 | -3.63704900 | 1.50726200  |
| F | -1.34292000 | -4.96406900 | -0.49703400 |
| F | -0.74683800 | -2.33028900 | 3.51008200  |
| F | -1.38141000 | -4.75202100 | 2.27931700  |
| C | 2.46831700  | 1.53282400  | 2.73993500  |
| H | 1.40592500  | 1.80765500  | 2.81756800  |
| H | 2.49805800  | 0.45807600  | 2.54202700  |
| H | 2.92656400  | 1.71765100  | 3.72213000  |
| C | 3.72936600  | 2.50454800  | -2.19130800 |
| H | 4.16862900  | 1.52374900  | -2.41014600 |
| H | 2.69799900  | 2.49161300  | -2.56931800 |
| H | 4.28465100  | 3.25940800  | -2.76426400 |
| C | -1.29043500 | 1.66904800  | -0.38649900 |
| C | -0.48094400 | 2.60791700  | -1.06735500 |
| C | -1.73173600 | 2.12947700  | 0.88111500  |
| C | -0.13649200 | 3.87685000  | -0.56435900 |
| C | -1.40080800 | 3.37956200  | 1.43514800  |
| C | -0.59702500 | 4.26875800  | 0.70204900  |
| F | -2.55110200 | 1.32173400  | 1.67441400  |
| F | -1.85998700 | 3.74536000  | 2.69556400  |
| F | -0.25479600 | 5.50598700  | 1.22621900  |
| F | 0.65851000  | 4.74284700  | -1.30821900 |
| F | 0.03786100  | 2.31773100  | -2.33640900 |
| C | -1.65883100 | 0.00330100  | -2.63067800 |
| H | -0.62891600 | -0.04305600 | -2.98563200 |
| H | -2.16304800 | -0.92892900 | -2.91929300 |
| H | -2.15187400 | 0.82112600  | -3.18245700 |
| C | 2.18690000  | -4.60240100 | -0.64201000 |
| H | 2.89228600  | -5.43662200 | -0.80021000 |
| H | 1.57602100  | -4.86439400 | 0.22733100  |
| H | 1.53068700  | -4.57044400 | -1.52178200 |
| C | 3.96223100  | -3.24386800 | -2.86282700 |
| H | 4.70714300  | -4.05917400 | -2.85968900 |
| H | 3.03076000  | -3.65741400 | -3.27161300 |
| H | 4.32445600  | -2.47834600 | -3.56040600 |
| C | 2.78848000  | -3.09423300 | 2.19158000  |
| H | 2.54075100  | -2.24536100 | 2.84415300  |
| H | 1.91075900  | -3.74688400 | 2.14662600  |
| H | 3.58780200  | -3.66298500 | 2.69699800  |
| C | 5.70186000  | -0.90409300 | -1.49363200 |
| H | 6.63650500  | -1.49017400 | -1.44136400 |

|                |            |             |             |
|----------------|------------|-------------|-------------|
| H              | 5.50884700 | -0.70465900 | -2.55591100 |
| H              | 5.89535100 | 0.05487600  | -0.99639600 |
| C              | 5.05669000 | -0.91462800 | 1.62996100  |
| H              | 4.52919600 | -0.87021000 | 2.58956600  |
| H              | 6.01311700 | -1.43632700 | 1.80995600  |
| H              | 5.29932600 | 0.11240500  | 1.33121700  |
| H              | 4.81470700 | 5.36644000  | 1.38088200  |
|                |            |             |             |
| Frequencies -- | -239.7896  | 12.3928     | 15.6573     |
| Frequencies -- | 18.0926    | 27.3951     | 30.7560     |
| Frequencies -- | 32.8228    | 37.0247     | 37.8480     |
| Frequencies -- | 44.3389    | 47.8719     | 55.5140     |
| Frequencies -- | 59.9433    | 69.4182     | 72.0095     |
| Frequencies -- | 81.2274    | 87.7293     | 95.4925     |
| Frequencies -- | 107.9767   | 110.2445    | 112.8671    |
| Frequencies -- | 115.9639   | 120.0674    | 120.9948    |
| Frequencies -- | 126.7092   | 132.1058    | 135.9592    |
| Frequencies -- | 143.9376   | 149.9230    | 152.0289    |
| Frequencies -- | 152.8298   | 156.6797    | 158.6718    |
| Frequencies -- | 159.5666   | 165.1801    | 168.1601    |
| Frequencies -- | 172.9880   | 174.4027    | 184.1882    |
| Frequencies -- | 190.3572   | 196.0356    | 198.3958    |
| Frequencies -- | 201.4564   | 205.3584    | 220.5423    |
| Frequencies -- | 224.8468   | 230.4024    | 241.0812    |
| Frequencies -- | 242.6628   | 250.5879    | 263.5101    |
| Frequencies -- | 265.5376   | 265.7363    | 267.1640    |
| Frequencies -- | 268.1791   | 269.6299    | 275.3154    |
| Frequencies -- | 276.0390   | 284.8114    | 285.9538    |
| Frequencies -- | 287.0152   | 293.5988    | 297.6343    |
| Frequencies -- | 300.0459   | 303.1587    | 305.7199    |
| Frequencies -- | 306.1777   | 317.8634    | 320.2921    |
| Frequencies -- | 328.9481   | 331.8215    | 334.2568    |
| Frequencies -- | 344.3835   | 355.4521    | 367.8048    |
| Frequencies -- | 375.5457   | 380.8092    | 382.2979    |
| Frequencies -- | 393.4562   | 398.7456    | 410.2430    |
| Frequencies -- | 422.3299   | 426.2506    | 431.4078    |
| Frequencies -- | 433.1080   | 439.0120    | 449.8944    |
| Frequencies -- | 454.2737   | 484.0272    | 494.5100    |
| Frequencies -- | 503.0215   | 517.0926    | 529.6634    |
| Frequencies -- | 535.0744   | 540.4628    | 542.7906    |
| Frequencies -- | 549.0517   | 551.0928    | 551.2697    |
| Frequencies -- | 554.8112   | 560.3378    | 567.3226    |
| Frequencies -- | 585.3492   | 592.8676    | 593.6618    |
| Frequencies -- | 602.4973   | 606.6430    | 629.1793    |
| Frequencies -- | 636.5218   | 642.1954    | 644.0103    |
| Frequencies -- | 647.2036   | 668.5983    | 685.3507    |
| Frequencies -- | 688.9484   | 711.1727    | 717.1975    |
| Frequencies -- | 719.8270   | 736.6660    | 739.2673    |
| Frequencies -- | 744.6133   | 751.0679    | 783.9977    |
| Frequencies -- | 788.1496   | 800.6025    | 807.4517    |
| Frequencies -- | 837.9543   | 886.9473    | 896.6906    |
| Frequencies -- | 907.8781   | 912.7200    | 916.9304    |
| Frequencies -- | 918.4955   | 923.1382    | 964.6533    |
| Frequencies -- | 974.6437   | 983.0490    | 989.7706    |
| Frequencies -- | 993.0069   | 1000.5080   | 1003.5962   |
| Frequencies -- | 1031.5769  | 1038.7240   | 1040.9775   |
| Frequencies -- | 1043.9609  | 1046.6927   | 1047.6901   |
| Frequencies -- | 1048.6847  | 1049.4899   | 1058.0614   |
| Frequencies -- | 1058.6947  | 1062.0571   | 1064.9288   |
| Frequencies -- | 1086.7174  | 1087.8053   | 1093.0031   |
| Frequencies -- | 1113.1225  | 1124.2460   | 1171.6815   |
| Frequencies -- | 1172.6700  | 1176.0076   | 1181.0830   |

|                |           |           |           |
|----------------|-----------|-----------|-----------|
| Frequencies -- | 1186.8487 | 1194.1684 | 1216.0421 |
| Frequencies -- | 1224.5204 | 1244.8895 | 1278.9788 |
| Frequencies -- | 1280.3062 | 1313.1351 | 1328.1933 |
| Frequencies -- | 1341.6619 | 1343.8804 | 1354.7582 |
| Frequencies -- | 1358.6379 | 1370.7066 | 1375.6279 |
| Frequencies -- | 1412.3276 | 1414.3741 | 1416.2815 |
| Frequencies -- | 1420.3166 | 1421.6434 | 1423.0449 |
| Frequencies -- | 1425.5843 | 1426.6636 | 1428.8770 |
| Frequencies -- | 1430.0837 | 1430.8707 | 1434.6719 |
| Frequencies -- | 1437.8015 | 1446.9233 | 1449.1298 |
| Frequencies -- | 1450.2288 | 1459.2140 | 1463.8378 |
| Frequencies -- | 1470.7454 | 1473.1165 | 1473.2982 |
| Frequencies -- | 1482.4137 | 1492.4464 | 1493.6663 |
| Frequencies -- | 1494.4919 | 1494.5942 | 1495.3963 |
| Frequencies -- | 1499.3227 | 1501.5962 | 1503.7164 |
| Frequencies -- | 1505.4517 | 1508.2222 | 1508.6131 |
| Frequencies -- | 1509.8676 | 1513.3009 | 1516.1685 |
| Frequencies -- | 1522.7994 | 1576.9838 | 1584.6182 |
| Frequencies -- | 1596.5824 | 1597.6273 | 1601.9022 |
| Frequencies -- | 1605.6643 | 1619.2597 | 1622.8149 |
| Frequencies -- | 3009.1620 | 3010.9253 | 3013.7778 |
| Frequencies -- | 3015.9678 | 3016.9170 | 3017.3468 |
| Frequencies -- | 3031.1033 | 3040.4670 | 3042.3818 |
| Frequencies -- | 3101.5655 | 3102.0083 | 3104.3652 |
| Frequencies -- | 3108.0713 | 3112.1174 | 3117.9697 |
| Frequencies -- | 3121.5325 | 3137.1146 | 3143.2711 |
| Frequencies -- | 3145.7730 | 3146.3124 | 3149.9953 |
| Frequencies -- | 3160.4673 | 3164.2520 | 3164.9961 |
| Frequencies -- | 3169.3718 | 3172.8176 | 3175.1431 |
| Frequencies -- | 3177.9940 | 3196.4208 | 3208.5113 |



**Catalyst 11:**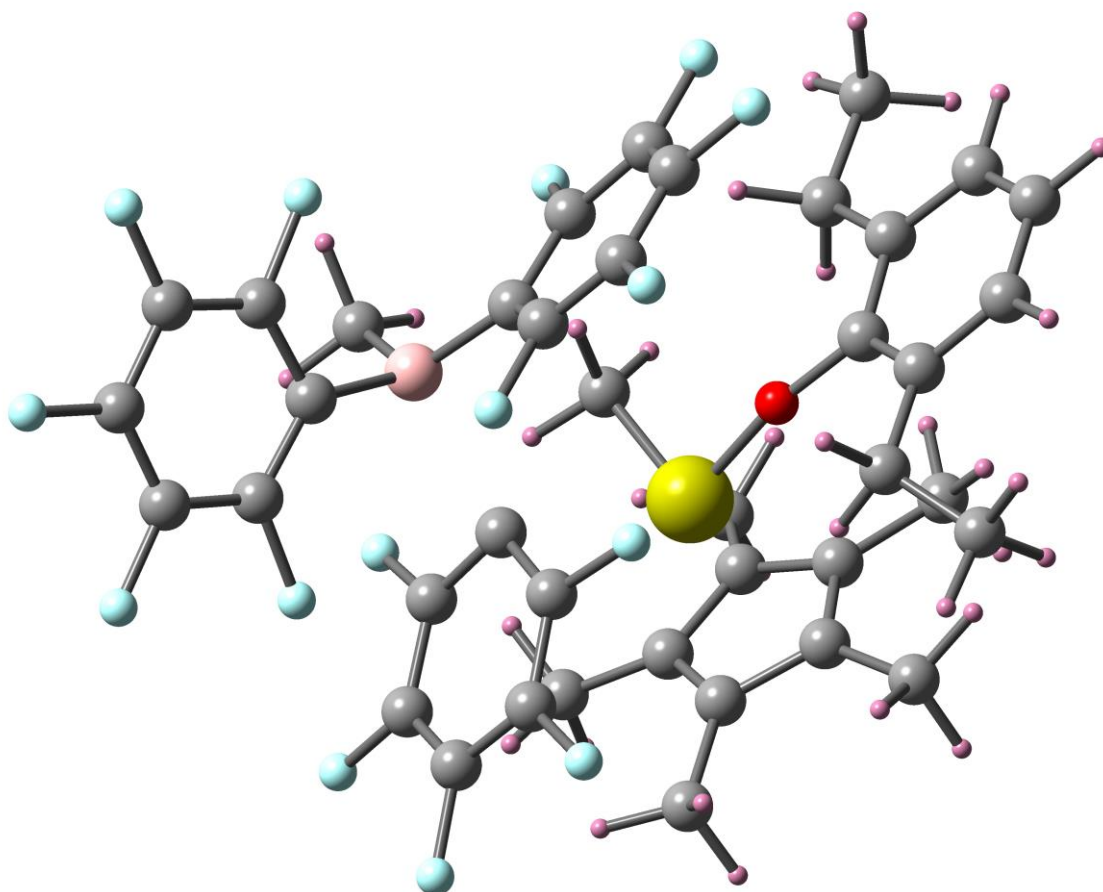

| vacuum        | toluene-like solvent | D3 dispersion |
|---------------|----------------------|---------------|
| -3199.4972267 | -3199.5066579        | -0.63020263   |

Imaginary frequency corresponding to vibration along the reaction coordinate:  $-240\text{ cm}^{-1}$ .

|    |            |             |             |
|----|------------|-------------|-------------|
| Ti | 2.10081600 | -1.16481700 | -0.57519800 |
| C  | 1.88227600 | -0.86421800 | -2.60759200 |
| H  | 1.24183300 | 0.02841800  | -2.61492800 |
| H  | 2.77717300 | -0.66844100 | -3.20631700 |
| H  | 1.33901600 | -1.72736200 | -3.02123700 |
| O  | 2.56742900 | 0.47988100  | -0.06387100 |
| C  | 3.20992200 | 1.65427600  | 0.36299700  |
| C  | 3.15515600 | 2.03100700  | 1.74258000  |
| C  | 3.87960200 | 2.45417500  | -0.62218800 |
| C  | 3.81515600 | 3.22704400  | 2.11600600  |
| C  | 4.52334400 | 3.63049700  | -0.17979300 |
| C  | 4.49845100 | 4.01552500  | 1.17455300  |
| H  | 3.78258900 | 3.54873500  | 3.15617700  |
| H  | 5.03636200 | 4.26293800  | -0.90139900 |
| C  | 2.65321100 | -3.39524100 | 0.43614600  |
| C  | 2.72797600 | -3.59024800 | -0.99099900 |
| C  | 3.62938800 | -2.39322600 | 0.80782400  |
| C  | 3.77020500 | -2.72925400 | -1.50399100 |
| C  | 4.32687500 | -1.98407500 | -0.39106800 |

|   |             |             |             |
|---|-------------|-------------|-------------|
| F | -7.85939700 | 0.42638500  | -0.27813400 |
| C | -6.48053700 | 0.38034800  | -0.42228100 |
| C | -5.74764800 | -0.72611100 | 0.03191400  |
| C | -5.78674800 | 1.43969700  | -1.03096300 |
| C | -4.34618600 | -0.75027600 | -0.12636600 |
| F | -6.40599400 | -1.79024200 | 0.63759400  |
| C | -4.38854000 | 1.36258000  | -1.16203500 |
| F | -6.48446600 | 2.54812100  | -1.49582400 |
| C | -3.58713200 | 0.27791100  | -0.71644500 |
| F | -3.72178900 | -1.90028000 | 0.37095900  |
| F | -3.78184800 | 2.46483300  | -1.78736600 |
| B | -1.97355500 | 0.38753300  | -1.09716200 |
| C | -0.74263300 | -1.31795400 | -0.14733900 |
| C | -1.04896500 | -2.58050700 | -0.71284900 |
| C | -0.77312400 | -1.34010300 | 1.26829800  |
| C | -1.44004900 | -3.71843300 | 0.01445400  |
| F | -0.97944800 | -2.76069800 | -2.10806900 |
| C | -1.16539100 | -2.43427300 | 2.05923000  |
| F | -0.36731000 | -0.19766700 | 1.98256200  |
| C | -1.51935600 | -3.63391400 | 1.41604200  |
| F | -1.72364100 | -4.93120000 | -0.61283600 |
| F | -1.17409400 | -2.37442300 | 3.45110400  |
| F | -1.88130500 | -4.74304000 | 2.16062500  |
| C | 2.35365400  | 1.24590800  | 2.78010600  |
| H | 2.19778800  | 0.22155000  | 2.43141400  |
| C | 3.86330300  | 2.06174600  | -2.09938600 |
| H | 2.81675400  | 2.04025600  | -2.43734700 |
| C | -1.31425100 | 1.71548700  | -0.42371800 |
| C | -0.41567700 | 2.57487200  | -1.09828300 |
| C | -1.71920700 | 2.21562100  | 0.84136500  |
| C | 0.04566900  | 3.80435400  | -0.59127500 |
| C | -1.27324900 | 3.42780800  | 1.39883200  |
| C | -0.38286800 | 4.23667000  | 0.67301400  |
| F | -2.62130200 | 1.49351500  | 1.62698300  |
| F | -1.70299100 | 3.83474800  | 2.65708500  |
| F | 0.07479800  | 5.43356400  | 1.20282400  |
| F | 0.92525000  | 4.59042600  | -1.32885000 |
| F | 0.08004300  | 2.23991300  | -2.36569700 |
| C | -1.82827000 | 0.08880300  | -2.66946500 |
| H | -0.80769400 | -0.03326300 | -3.03399900 |
| H | -2.40207200 | -0.80382800 | -2.95376200 |
| H | -2.26539400 | 0.94139100  | -3.21738900 |
| H | 4.99559500  | 4.93484800  | 1.48991900  |
| C | 2.94464500  | 1.20336800  | 4.21180200  |
| H | 3.98185300  | 0.83251400  | 4.21863600  |
| H | 2.93644300  | 2.18990800  | 4.69785600  |
| H | 2.33596400  | 0.53273400  | 4.83878500  |
| C | 4.66631400  | 2.95798200  | -3.06762400 |
| H | 4.59174900  | 2.55023200  | -4.08824600 |
| H | 4.27229300  | 3.98524900  | -3.09703100 |
| H | 5.73510200  | 3.00581300  | -2.80436300 |
| H | 4.22714600  | 1.02849800  | -2.19580800 |
| H | 1.34396800  | 1.68573000  | 2.83874300  |
| C | 1.92042400  | -4.27071800 | 1.42649100  |
| H | 2.63224000  | -5.00925200 | 1.83537600  |
| H | 1.52035700  | -3.71439600 | 2.28355200  |
| H | 1.10394300  | -4.83881200 | 0.97051800  |

|   |            |             |             |
|---|------------|-------------|-------------|
| C | 1.98830200 | -4.62791300 | -1.80452200 |
| H | 2.64859900 | -5.49293100 | -1.99125700 |
| H | 1.09419700 | -5.00575000 | -1.29747400 |
| H | 1.67427400 | -4.24634500 | -2.78572600 |
| C | 4.03445300 | -2.06102000 | 2.22509400  |
| H | 3.18394700 | -2.05312500 | 2.91999300  |
| H | 4.74018300 | -2.82781400 | 2.59121600  |
| H | 4.54112800 | -1.09211200 | 2.30032900  |
| C | 4.35437100 | -2.81320400 | -2.89335300 |
| H | 5.08118200 | -3.64360400 | -2.93180500 |
| H | 3.59338900 | -3.01369400 | -3.65821700 |
| H | 4.89121700 | -1.90035400 | -3.18216600 |
| C | 5.57281600 | -1.12894500 | -0.42806800 |
| H | 5.53147200 | -0.29208200 | 0.27990800  |
| H | 6.44858900 | -1.74440900 | -0.15746400 |
| H | 5.76657700 | -0.71384800 | -1.42485400 |

|                |           |          |          |
|----------------|-----------|----------|----------|
| Frequencies -- | -239.6367 | 11.4970  | 14.3034  |
| Frequencies -- | 15.5358   | 24.5968  | 27.8604  |
| Frequencies -- | 29.8636   | 31.0886  | 36.7062  |
| Frequencies -- | 37.8594   | 40.6717  | 45.9192  |
| Frequencies -- | 50.1467   | 58.4770  | 62.0436  |
| Frequencies -- | 66.7503   | 70.8002  | 82.8050  |
| Frequencies -- | 89.2136   | 92.8361  | 104.1186 |
| Frequencies -- | 110.0827  | 113.5372 | 116.5204 |
| Frequencies -- | 120.4198  | 122.0469 | 125.8281 |
| Frequencies -- | 135.7054  | 139.6184 | 143.1920 |
| Frequencies -- | 150.1542  | 155.9877 | 158.1144 |
| Frequencies -- | 160.6872  | 163.5112 | 165.4725 |
| Frequencies -- | 169.4366  | 175.0823 | 180.2367 |
| Frequencies -- | 183.5668  | 189.9497 | 190.9758 |
| Frequencies -- | 195.3513  | 196.5284 | 200.6170 |
| Frequencies -- | 205.8230  | 214.9865 | 220.5756 |
| Frequencies -- | 224.9868  | 243.0176 | 244.7368 |
| Frequencies -- | 262.5779  | 263.9493 | 265.0261 |
| Frequencies -- | 265.5752  | 266.9999 | 270.1855 |
| Frequencies -- | 270.4853  | 275.2425 | 276.0483 |
| Frequencies -- | 277.3447  | 281.6476 | 290.8014 |
| Frequencies -- | 297.3000  | 298.0359 | 299.7595 |
| Frequencies -- | 301.1307  | 302.4506 | 303.7593 |
| Frequencies -- | 305.2440  | 315.6279 | 316.7246 |
| Frequencies -- | 319.0292  | 326.2163 | 327.7235 |
| Frequencies -- | 332.3612  | 347.7611 | 367.5201 |
| Frequencies -- | 372.1428  | 375.9005 | 376.7358 |
| Frequencies -- | 380.9943  | 390.1648 | 399.2868 |
| Frequencies -- | 408.6982  | 422.9169 | 424.9361 |
| Frequencies -- | 431.4222  | 432.5974 | 437.9713 |
| Frequencies -- | 449.5941  | 453.2699 | 483.9956 |
| Frequencies -- | 499.0391  | 504.8897 | 527.4518 |
| Frequencies -- | 534.9462  | 539.1999 | 540.1894 |
| Frequencies -- | 542.3866  | 547.2305 | 550.8420 |
| Frequencies -- | 553.7339  | 565.3957 | 575.5358 |
| Frequencies -- | 583.8265  | 587.5298 | 592.1237 |
| Frequencies -- | 599.5682  | 602.3045 | 618.1345 |
| Frequencies -- | 629.2704  | 636.8767 | 640.9748 |
| Frequencies -- | 644.3726  | 646.5689 | 665.8405 |
| Frequencies -- | 685.3254  | 686.7437 | 710.7123 |
| Frequencies -- | 717.1877  | 720.2642 | 721.0939 |
| Frequencies -- | 736.5174  | 739.8676 | 752.4036 |
| Frequencies -- | 771.5972  | 784.0565 | 789.3832 |
| Frequencies -- | 801.6708  | 806.2030 | 825.4920 |

|                |           |           |           |
|----------------|-----------|-----------|-----------|
| Frequencies -- | 836.2755  | 854.4866  | 885.9143  |
| Frequencies -- | 894.5557  | 908.0775  | 914.1416  |
| Frequencies -- | 918.1565  | 919.8640  | 965.0951  |
| Frequencies -- | 972.6462  | 981.4223  | 991.2703  |
| Frequencies -- | 991.3789  | 992.8171  | 1000.6086 |
| Frequencies -- | 1025.9495 | 1029.6173 | 1040.0871 |
| Frequencies -- | 1041.3742 | 1045.5617 | 1046.7959 |
| Frequencies -- | 1047.7386 | 1048.3467 | 1052.6959 |
| Frequencies -- | 1057.8902 | 1062.8578 | 1083.4540 |
| Frequencies -- | 1087.3947 | 1088.4453 | 1091.6919 |
| Frequencies -- | 1094.1458 | 1103.8390 | 1124.0799 |
| Frequencies -- | 1125.3316 | 1169.4521 | 1171.4866 |
| Frequencies -- | 1173.6754 | 1176.1951 | 1189.5621 |
| Frequencies -- | 1204.6103 | 1216.3662 | 1225.2825 |
| Frequencies -- | 1244.3331 | 1255.4566 | 1271.8927 |
| Frequencies -- | 1284.5921 | 1300.6104 | 1313.3938 |
| Frequencies -- | 1326.5716 | 1329.3516 | 1341.7266 |
| Frequencies -- | 1344.1866 | 1347.3772 | 1358.8333 |
| Frequencies -- | 1367.1686 | 1374.4858 | 1381.0950 |
| Frequencies -- | 1411.1164 | 1413.4073 | 1415.2450 |
| Frequencies -- | 1416.4431 | 1416.8316 | 1423.3639 |
| Frequencies -- | 1424.1757 | 1426.8076 | 1428.1742 |
| Frequencies -- | 1431.6455 | 1433.2499 | 1433.6477 |
| Frequencies -- | 1438.4098 | 1444.8703 | 1449.4133 |
| Frequencies -- | 1451.0185 | 1458.3458 | 1462.4865 |
| Frequencies -- | 1471.4026 | 1471.9501 | 1473.0309 |
| Frequencies -- | 1483.6737 | 1485.6936 | 1489.4110 |
| Frequencies -- | 1490.8626 | 1493.0340 | 1494.8996 |
| Frequencies -- | 1495.3988 | 1499.4126 | 1500.7974 |
| Frequencies -- | 1501.9124 | 1503.7271 | 1506.5841 |
| Frequencies -- | 1507.9519 | 1510.2483 | 1510.6452 |
| Frequencies -- | 1511.5450 | 1515.2717 | 1521.7320 |
| Frequencies -- | 1576.5746 | 1583.6685 | 1596.9312 |
| Frequencies -- | 1597.3872 | 1597.8197 | 1607.1576 |
| Frequencies -- | 1619.9139 | 1622.9148 | 3008.0112 |
| Frequencies -- | 3011.5273 | 3011.8526 | 3013.1341 |
| Frequencies -- | 3013.8923 | 3014.9982 | 3016.6194 |
| Frequencies -- | 3023.3234 | 3025.1868 | 3042.0892 |
| Frequencies -- | 3051.7086 | 3095.6356 | 3101.4504 |
| Frequencies -- | 3103.9734 | 3105.7998 | 3109.4453 |
| Frequencies -- | 3110.1453 | 3112.5743 | 3114.3515 |
| Frequencies -- | 3114.4384 | 3116.5576 | 3125.4491 |
| Frequencies -- | 3146.1542 | 3150.7036 | 3152.7612 |
| Frequencies -- | 3153.9753 | 3157.5756 | 3164.6712 |
| Frequencies -- | 3171.5433 | 3173.4498 | 3180.6269 |
| Frequencies -- | 3201.9159 | 3203.0803 | 3214.9389 |

**Catalyst 12:**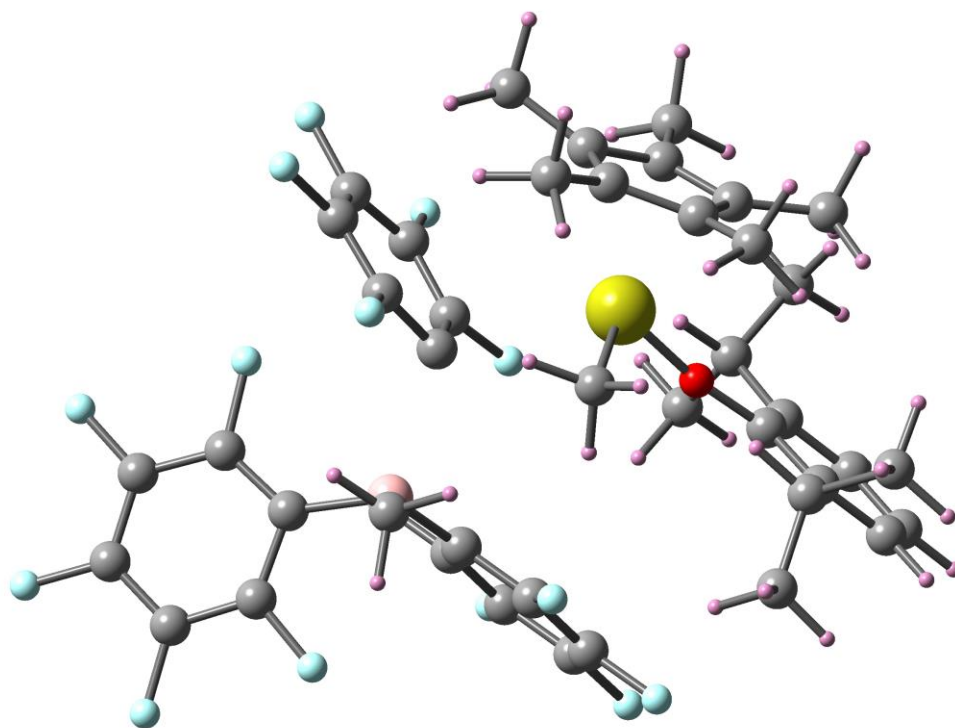

| <b>vacuum</b> | <b>toluene-like solvent</b> | <b>D3 dispersion</b> |
|---------------|-----------------------------|----------------------|
| -3278.0682546 | -3278.0780308               | -0.66483448          |

Imaginary frequency corresponding to vibration along the reaction coordinate:  $-237\text{ cm}^{-1}$ .

|    |             |             |             |
|----|-------------|-------------|-------------|
| Ti | -2.08781900 | 1.26343100  | -0.57180200 |
| C  | -1.75413900 | 0.90792600  | -2.57964100 |
| H  | -1.30848200 | -0.09686700 | -2.57209200 |
| H  | -2.57694900 | 0.93975500  | -3.30044300 |
| H  | -0.99421900 | 1.65716300  | -2.85665500 |
| O  | -2.69818000 | -0.33262800 | -0.04958900 |
| C  | -3.37772700 | -1.50406200 | 0.33841300  |
| C  | -3.35273700 | -1.91311500 | 1.71456000  |
| C  | -4.06333900 | -2.27340200 | -0.66263400 |
| C  | -3.99039100 | -3.13244000 | 2.04649500  |
| C  | -4.67790200 | -3.48056900 | -0.25589000 |
| C  | -4.63934900 | -3.91725400 | 1.07888800  |
| H  | -3.97332700 | -3.47285800 | 3.08178300  |
| H  | -5.19089400 | -4.08926400 | -1.00038800 |
| C  | -2.35501400 | 3.72778500  | -0.06238600 |
| C  | -2.78045300 | 3.56747900  | -1.42635300 |
| C  | -3.19371300 | 2.89405700  | 0.77702000  |
| C  | -3.90925800 | 2.66228600  | -1.43746300 |
| C  | -4.17763700 | 2.25676600  | -0.07090200 |
| F  | 8.06160500  | -0.32609300 | -0.53545900 |
| C  | 6.67690600  | -0.31005800 | -0.61663200 |
| C  | 5.93414100  | 0.71247500  | -0.00758000 |

|   |             |             |             |
|---|-------------|-------------|-------------|
| C | 5.98718100  | -1.32134900 | -1.30632900 |
| C | 4.52687600  | 0.70815600  | -0.10379400 |
| F | 6.58860500  | 1.71709700  | 0.69577800  |
| C | 4.58294700  | -1.27401500 | -1.37395300 |
| F | 6.69422500  | -2.35461900 | -1.90973200 |
| C | 3.77416400  | -0.26363000 | -0.78973500 |
| F | 3.89032400  | 1.75200900  | 0.57515400  |
| F | 3.97704600  | -2.33509600 | -2.06745900 |
| B | 2.15072600  | -0.40175800 | -1.10374800 |
| C | 0.90048800  | 1.31987300  | -0.09572000 |
| C | 1.28840300  | 2.58526400  | -0.59124600 |
| C | 0.85619200  | 1.27700800  | 1.31447000  |
| C | 1.71053800  | 3.66524000  | 0.20172600  |
| F | 1.26458100  | 2.83476400  | -1.98208600 |
| C | 1.24226900  | 2.32186800  | 2.17412900  |
| F | 0.37533300  | 0.11355200  | 1.95214100  |
| C | 1.69731300  | 3.52405900  | 1.60156500  |
| F | 2.09569500  | 4.88394200  | -0.35667700 |
| F | 1.16046600  | 2.20940200  | 3.56186400  |
| F | 2.07077800  | 4.58421000  | 2.41140800  |
| C | -2.68929500 | -1.10931200 | 2.84518500  |
| H | -2.22999600 | -0.21192100 | 2.41384500  |
| C | -4.17711600 | -1.85560500 | -2.13781100 |
| H | -3.69964800 | -0.87789500 | -2.25274100 |
| C | 1.54086400  | -1.72692300 | -0.38850700 |
| C | 0.63277200  | -2.60931100 | -1.01883000 |
| C | 2.00637900  | -2.20394700 | 0.86412600  |
| C | 0.22645900  | -3.84754900 | -0.48574000 |
| C | 1.62642400  | -3.42891200 | 1.44119300  |
| C | 0.72861400  | -4.26519100 | 0.75664400  |
| F | 2.89214400  | -1.43334600 | 1.62089600  |
| F | 2.11655500  | -3.81552400 | 2.68297800  |
| F | 0.33017300  | -5.47298700 | 1.30850500  |
| F | -0.66715000 | -4.65990600 | -1.17679000 |
| F | 0.07556000  | -2.28883000 | -2.26297900 |
| C | 1.89942000  | -0.09006000 | -2.65617100 |
| H | 0.85224200  | 0.01273700  | -2.94079700 |
| H | 2.43295800  | 0.81872600  | -2.96540900 |
| H | 2.31226400  | -0.92533200 | -3.24656200 |
| C | -1.43161000 | 4.80713000  | 0.44907100  |
| H | -2.03272100 | 5.71497600  | 0.63661700  |
| H | -0.95559100 | 4.54587900  | 1.40016800  |
| H | -0.65350200 | 5.08494300  | -0.26907300 |
| C | -2.24115900 | 4.32870400  | -2.61442100 |
| H | -2.80809300 | 5.26675300  | -2.74904400 |
| H | -1.18506900 | 4.60067700  | -2.49017800 |
| H | -2.33042300 | 3.76022200  | -3.54878400 |
| C | -3.18380100 | 2.91040200  | 2.28967900  |
| H | -3.75749700 | 2.08344300  | 2.71866300  |
| H | -2.16919100 | 2.87012000  | 2.71231900  |
| H | -3.64102100 | 3.84780500  | 2.65204800  |
| C | -4.80698200 | 2.39426500  | -2.62242500 |
| H | -5.65654500 | 3.09948200  | -2.60356500 |
| H | -4.28947700 | 2.54098800  | -3.57843400 |
| H | -5.22797100 | 1.38203800  | -2.61635000 |
| C | -5.40303200 | 1.51085900  | 0.40211700  |
| H | -5.20596200 | 0.88558500  | 1.27989200  |

|   |             |             |             |
|---|-------------|-------------|-------------|
| H | -6.18555500 | 2.23712600  | 0.68387200  |
| H | -5.82534300 | 0.86411500  | -0.37534200 |
| H | -5.11274300 | -4.85885700 | 1.36325500  |
| C | -3.73597100 | -0.64939000 | 3.90573800  |
| H | -4.57554700 | -0.10207800 | 3.45103800  |
| H | -4.16108400 | -1.50660200 | 4.44883500  |
| H | -3.25650000 | 0.00746000  | 4.64912000  |
| C | -1.55077200 | -1.90781900 | 3.54348800  |
| H | -0.79927800 | -2.24380000 | 2.82024800  |
| H | -1.04161600 | -1.26988300 | 4.28191500  |
| H | -1.93728500 | -2.79244200 | 4.07163300  |
| C | -3.43451600 | -2.84361100 | -3.08543800 |
| H | -3.48684400 | -2.47960800 | -4.12452100 |
| H | -2.37799600 | -2.94669600 | -2.81208600 |
| H | -3.88778300 | -3.84634100 | -3.05959200 |
| C | -5.66387800 | -1.70424600 | -2.58117900 |
| H | -6.22281500 | -1.02380100 | -1.92059700 |
| H | -5.71197700 | -1.30709000 | -3.60818600 |
| H | -6.18949700 | -2.67048100 | -2.57956200 |

|                |           |          |          |
|----------------|-----------|----------|----------|
| Frequencies -- | -237.3892 | 13.4420  | 15.7520  |
| Frequencies -- | 23.6599   | 25.9910  | 29.3885  |
| Frequencies -- | 30.5419   | 31.3161  | 34.4141  |
| Frequencies -- | 37.5813   | 41.8278  | 44.6330  |
| Frequencies -- | 49.8450   | 53.5113  | 61.2790  |
| Frequencies -- | 71.3549   | 73.1674  | 82.0484  |
| Frequencies -- | 86.3600   | 89.1695  | 95.9326  |
| Frequencies -- | 101.6642  | 103.7507 | 108.0397 |
| Frequencies -- | 108.6529  | 110.4662 | 112.0057 |
| Frequencies -- | 119.6968  | 123.1199 | 124.6339 |
| Frequencies -- | 126.7788  | 129.7035 | 132.2361 |
| Frequencies -- | 138.9665  | 150.1689 | 155.6387 |
| Frequencies -- | 158.3713  | 162.4798 | 162.8305 |
| Frequencies -- | 169.4319  | 175.3376 | 176.2189 |
| Frequencies -- | 186.5438  | 187.5743 | 202.3060 |
| Frequencies -- | 205.1365  | 217.3848 | 218.9372 |
| Frequencies -- | 225.9277  | 227.8359 | 232.6837 |
| Frequencies -- | 233.3367  | 239.8818 | 245.1077 |
| Frequencies -- | 249.9716  | 255.8810 | 260.0559 |
| Frequencies -- | 264.1450  | 265.1145 | 265.8564 |
| Frequencies -- | 267.5529  | 270.4845 | 274.4671 |
| Frequencies -- | 275.4249  | 279.9659 | 281.5852 |
| Frequencies -- | 285.4376  | 289.0213 | 297.7117 |
| Frequencies -- | 298.2547  | 300.0134 | 302.1412 |
| Frequencies -- | 304.2689  | 310.1025 | 312.4437 |
| Frequencies -- | 316.2462  | 317.4137 | 320.8434 |
| Frequencies -- | 326.3112  | 328.4442 | 333.7369 |
| Frequencies -- | 361.4256  | 366.2556 | 375.2093 |
| Frequencies -- | 381.7472  | 382.1120 | 398.9198 |
| Frequencies -- | 410.6932  | 421.3352 | 425.3336 |
| Frequencies -- | 427.4200  | 431.3426 | 432.0825 |
| Frequencies -- | 432.9755  | 437.3107 | 438.1551 |
| Frequencies -- | 449.1766  | 453.7494 | 483.3088 |
| Frequencies -- | 492.8312  | 526.8935 | 536.2031 |
| Frequencies -- | 537.5049  | 539.8713 | 541.4690 |
| Frequencies -- | 545.3485  | 550.8760 | 552.2099 |
| Frequencies -- | 562.6986  | 579.4475 | 589.0371 |
| Frequencies -- | 592.6494  | 594.5094 | 604.0271 |
| Frequencies -- | 607.3159  | 620.7239 | 628.7936 |
| Frequencies -- | 628.8595  | 637.2642 | 642.6945 |
| Frequencies -- | 643.1340  | 643.9099 | 663.4572 |

|                |           |           |           |
|----------------|-----------|-----------|-----------|
| Frequencies -- | 684.6206  | 687.4809  | 708.6665  |
| Frequencies -- | 717.6109  | 719.0614  | 727.3635  |
| Frequencies -- | 740.1979  | 753.7783  | 761.2829  |
| Frequencies -- | 784.9357  | 796.7874  | 800.5772  |
| Frequencies -- | 805.5761  | 815.3397  | 841.1244  |
| Frequencies -- | 876.0941  | 881.1011  | 896.3333  |
| Frequencies -- | 907.7476  | 916.7426  | 921.2954  |
| Frequencies -- | 922.5307  | 930.5584  | 933.3602  |
| Frequencies -- | 938.1512  | 960.2912  | 964.0830  |
| Frequencies -- | 967.1949  | 969.6326  | 976.3380  |
| Frequencies -- | 991.0785  | 994.4945  | 1003.5036 |
| Frequencies -- | 1023.4003 | 1038.3780 | 1039.8539 |
| Frequencies -- | 1043.2279 | 1045.1474 | 1046.4280 |
| Frequencies -- | 1050.0589 | 1056.3637 | 1059.2418 |
| Frequencies -- | 1065.1771 | 1072.5750 | 1088.0144 |
| Frequencies -- | 1088.2913 | 1099.0125 | 1109.8856 |
| Frequencies -- | 1111.6321 | 1114.6074 | 1125.3661 |
| Frequencies -- | 1166.5976 | 1167.0451 | 1169.9672 |
| Frequencies -- | 1172.6242 | 1175.4113 | 1181.6469 |
| Frequencies -- | 1186.9313 | 1205.1785 | 1217.0436 |
| Frequencies -- | 1227.2242 | 1240.5711 | 1247.8293 |
| Frequencies -- | 1274.7020 | 1301.5211 | 1314.2426 |
| Frequencies -- | 1321.9930 | 1326.9792 | 1330.1007 |
| Frequencies -- | 1331.8518 | 1343.9059 | 1351.6077 |
| Frequencies -- | 1359.3153 | 1370.4779 | 1374.7542 |
| Frequencies -- | 1380.7087 | 1401.4117 | 1403.9686 |
| Frequencies -- | 1412.4491 | 1413.3309 | 1416.1359 |
| Frequencies -- | 1421.1181 | 1423.2278 | 1423.6376 |
| Frequencies -- | 1424.5027 | 1425.5085 | 1428.0371 |
| Frequencies -- | 1429.8978 | 1432.3537 | 1433.6462 |
| Frequencies -- | 1435.9192 | 1442.6075 | 1450.1924 |
| Frequencies -- | 1452.3841 | 1456.2629 | 1464.6752 |
| Frequencies -- | 1470.7234 | 1472.6717 | 1472.8707 |
| Frequencies -- | 1482.3974 | 1488.9123 | 1489.8513 |
| Frequencies -- | 1490.3627 | 1490.9339 | 1492.2815 |
| Frequencies -- | 1493.9151 | 1496.8095 | 1499.8057 |
| Frequencies -- | 1502.0160 | 1502.7606 | 1503.1953 |
| Frequencies -- | 1504.0417 | 1506.9532 | 1508.2621 |
| Frequencies -- | 1510.5129 | 1512.1681 | 1514.1225 |
| Frequencies -- | 1517.8098 | 1522.1325 | 1577.5340 |
| Frequencies -- | 1582.9002 | 1594.3188 | 1596.7802 |
| Frequencies -- | 1597.2612 | 1605.4356 | 1619.4045 |
| Frequencies -- | 1622.3720 | 3010.1399 | 3010.3757 |
| Frequencies -- | 3011.2836 | 3011.5169 | 3012.3370 |
| Frequencies -- | 3012.7987 | 3013.6862 | 3016.5901 |
| Frequencies -- | 3020.1373 | 3028.9482 | 3030.3692 |
| Frequencies -- | 3095.3730 | 3097.5624 | 3105.4796 |
| Frequencies -- | 3106.8240 | 3107.7797 | 3111.3910 |
| Frequencies -- | 3112.7623 | 3115.2686 | 3117.8741 |
| Frequencies -- | 3119.1811 | 3119.2723 | 3124.2315 |
| Frequencies -- | 3131.2146 | 3135.3208 | 3143.0479 |
| Frequencies -- | 3149.9149 | 3158.5210 | 3165.3254 |
| Frequencies -- | 3166.1794 | 3167.7879 | 3168.3310 |
| Frequencies -- | 3175.2428 | 3178.0991 | 3178.5094 |
| Frequencies -- | 3188.0371 | 3201.1761 | 3210.8690 |



**Catalyst 13:****distal conformation**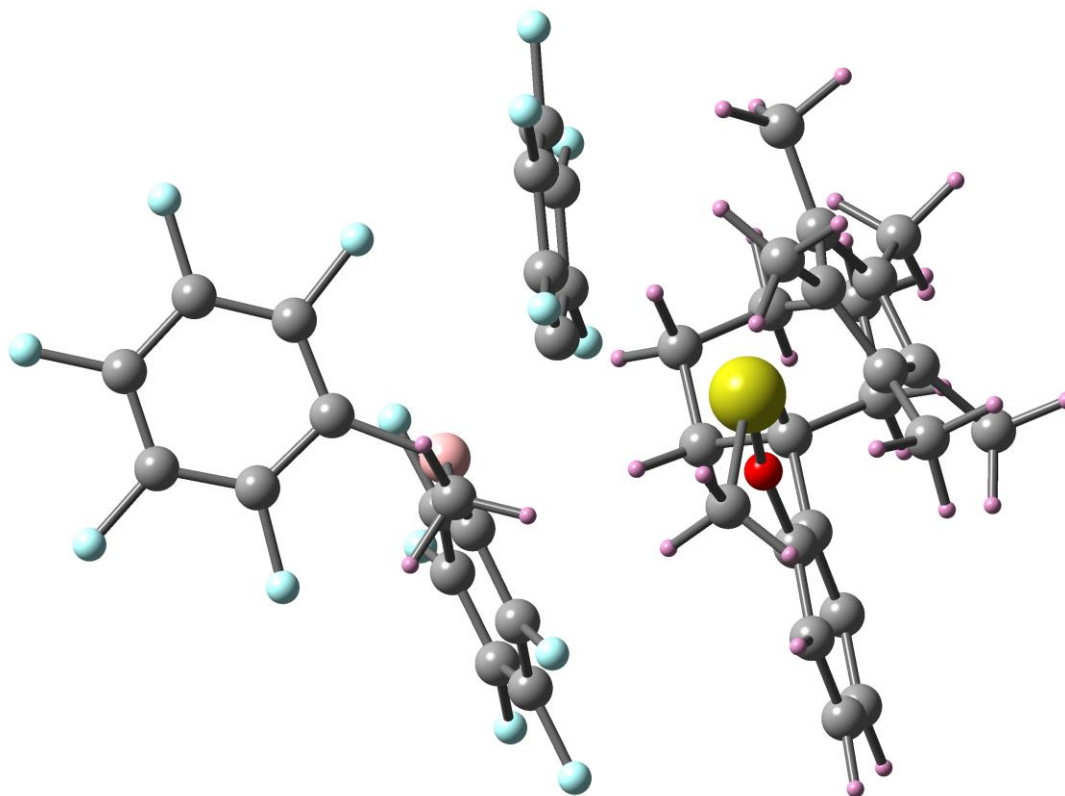

| vacuum        | toluene-like solvent | D3 dispersion |
|---------------|----------------------|---------------|
| -3276.8807033 | -3276.8904312        | -0.66362404   |

Imaginary frequency corresponding to vibration along the reaction coordinate:  $-240\text{ cm}^{-1}$ .

|    |             |             |             |
|----|-------------|-------------|-------------|
| Ti | 1.86779300  | -1.32567200 | -1.05574600 |
| C  | 1.46789400  | -1.04276600 | -3.06685800 |
| H  | 0.77230900  | -0.19357500 | -3.03667000 |
| H  | 2.31404300  | -0.78778900 | -3.71530200 |
| H  | 0.96111400  | -1.93732500 | -3.46217600 |
| O  | 2.37195600  | 0.34771600  | -0.71047600 |
| C  | 3.00227400  | 1.59486400  | -0.80018100 |
| C  | 3.41115600  | 2.33326200  | 0.35285800  |
| C  | 3.19518700  | 2.10475800  | -2.11152200 |
| C  | 4.02927400  | 3.58923200  | 0.10567100  |
| C  | 3.81094700  | 3.35005900  | -2.31117700 |
| C  | 4.23582000  | 4.09689100  | -1.19050000 |
| H  | 4.34832900  | 4.18993900  | 0.95763900  |
| H  | 3.94208600  | 3.73646900  | -3.32354300 |
| C  | 2.60598700  | -3.54286600 | -0.08378500 |
| C  | 2.52215600  | -3.75170100 | -1.50697800 |
| C  | 3.56738500  | -2.48958300 | 0.16403300  |
| C  | 3.46609200  | -2.86041500 | -2.14391200 |
| C  | 4.11128400  | -2.07353600 | -1.11118300 |
| F  | -7.82515500 | 0.05738000  | 0.60236100  |

|   |             |             |             |
|---|-------------|-------------|-------------|
| C | -6.48404000 | 0.03390700  | 0.24912300  |
| C | -5.59596300 | -0.86391000 | 0.85917400  |
| C | -5.98291000 | 0.91095100  | -0.72726000 |
| C | -4.23730000 | -0.86978700 | 0.48092000  |
| F | -6.05800400 | -1.73703700 | 1.83755500  |
| C | -4.61872200 | 0.85941400  | -1.06697000 |
| F | -6.83529400 | 1.81770200  | -1.34602600 |
| C | -3.66840500 | -0.02791500 | -0.49370200 |
| F | -3.44271900 | -1.78604300 | 1.18084400  |
| F | -4.21205400 | 1.78257700  | -2.04413900 |
| B | -2.14043200 | 0.04947500  | -1.15731900 |
| C | -0.70708700 | -1.36342300 | -0.14042500 |
| C | -1.08241700 | -2.71751900 | -0.34157700 |
| C | -0.42505700 | -1.07939000 | 1.22166300  |
| C | -1.27381100 | -3.66365500 | 0.67907900  |
| F | -1.29197300 | -3.19744600 | -1.64783100 |
| C | -0.58452400 | -1.97917300 | 2.29062400  |
| F | 0.07178900  | 0.18680900  | 1.57105000  |
| C | -1.03626100 | -3.28206900 | 2.01137500  |
| F | -1.65016600 | -4.97622700 | 0.40144600  |
| F | -0.28410500 | -1.62514400 | 3.60360200  |
| F | -1.18768800 | -4.19959600 | 3.03488000  |
| C | -1.50830800 | 1.53162500  | -0.89212800 |
| C | -0.85308600 | 2.30061400  | -1.88299300 |
| C | -1.73772000 | 2.25153800  | 0.30887800  |
| C | -0.45971300 | 3.64290300  | -1.72077300 |
| C | -1.35533200 | 3.58775600  | 0.52344000  |
| C | -0.71044200 | 4.29567200  | -0.50424500 |
| F | -2.38581200 | 1.63505800  | 1.38367800  |
| F | -1.59989500 | 4.21299900  | 1.74133000  |
| F | -0.31538400 | 5.61104000  | -0.31333100 |
| F | 0.17523300  | 4.32549400  | -2.75240200 |
| F | -0.56017700 | 1.75225100  | -3.13829200 |
| C | -2.23483500 | -0.55082000 | -2.64813400 |
| H | -1.27840000 | -0.73013700 | -3.14037200 |
| H | -2.80401600 | -1.49001100 | -2.65671700 |
| H | -2.78789600 | 0.16724900  | -3.27522800 |
| C | 2.04761700  | -4.45441100 | 0.98391300  |
| H | 2.79475900  | -5.24071200 | 1.19267900  |
| H | 1.86037800  | -3.94058800 | 1.93461300  |
| H | 1.13043000  | -4.96676100 | 0.67739000  |
| C | 1.72409100  | -4.82602600 | -2.21069200 |
| H | 2.36553700  | -5.70357700 | -2.40551200 |
| H | 0.86841300  | -5.17168800 | -1.61921100 |
| H | 1.33679600  | -4.48885900 | -3.18200400 |
| C | 4.07618000  | -2.08674500 | 1.52867000  |
| H | 4.60405700  | -1.12828900 | 1.51209900  |
| H | 3.27077800  | -2.01333200 | 2.27312900  |
| H | 4.78791100  | -2.84513500 | 1.89875300  |
| C | 3.90561700  | -2.94736500 | -3.58551200 |
| H | 4.72302500  | -3.68529400 | -3.66779700 |
| H | 3.09985100  | -3.27707600 | -4.25350500 |
| H | 4.29279700  | -1.99377900 | -3.96712700 |
| C | 5.29455400  | -1.15640900 | -1.31706700 |
| H | 5.35899100  | -0.37626200 | -0.54958000 |
| H | 6.22982100  | -1.74159500 | -1.27034800 |
| H | 5.27245300  | -0.65535500 | -2.29362700 |

|   |            |            |             |
|---|------------|------------|-------------|
| H | 2.84377100 | 1.52581200 | -2.96242100 |
| H | 4.71034800 | 5.07066200 | -1.32479300 |
| C | 3.18478400 | 1.86898600 | 1.79598200  |
| C | 4.51194700 | 1.79047100 | 2.61734300  |
| C | 2.16185200 | 2.78640700 | 2.54228300  |
| H | 2.74660600 | 0.86199200 | 1.76892400  |
| C | 4.26447800 | 1.31371400 | 4.07176800  |
| H | 4.98912500 | 2.78429300 | 2.64827900  |
| H | 5.22952100 | 1.11881100 | 2.11596000  |
| C | 1.91169300 | 2.30745500 | 3.99368600  |
| H | 2.53987400 | 3.82308400 | 2.56076500  |
| H | 1.21268900 | 2.80374400 | 1.98962800  |
| C | 3.22857400 | 2.20528800 | 4.80025700  |
| H | 5.21994500 | 1.31170200 | 4.62456200  |
| H | 3.90161900 | 0.26988500 | 4.06442700  |
| H | 1.21424600 | 3.00226600 | 4.49108100  |
| H | 1.41245400 | 1.32339100 | 3.97113400  |
| H | 3.02613600 | 1.80122300 | 5.80670000  |
| H | 3.65233800 | 3.21624900 | 4.94345200  |

|                |           |          |          |
|----------------|-----------|----------|----------|
| Frequencies -- | -240.0613 | 12.1998  | 14.7806  |
| Frequencies -- | 16.2177   | 25.8826  | 28.5638  |
| Frequencies -- | 33.0700   | 34.1555  | 38.9018  |
| Frequencies -- | 42.8722   | 47.3145  | 50.4664  |
| Frequencies -- | 54.4006   | 59.1397  | 61.3212  |
| Frequencies -- | 68.1026   | 75.4061  | 80.3210  |
| Frequencies -- | 87.1220   | 90.8761  | 95.3392  |
| Frequencies -- | 97.6519   | 111.3589 | 113.7528 |
| Frequencies -- | 116.8626  | 119.1987 | 121.4129 |
| Frequencies -- | 127.2596  | 135.3331 | 139.9340 |
| Frequencies -- | 144.2326  | 149.0924 | 149.9831 |
| Frequencies -- | 152.8547  | 157.2329 | 158.2520 |
| Frequencies -- | 159.8810  | 164.6721 | 170.4975 |
| Frequencies -- | 175.9859  | 181.7022 | 192.9378 |
| Frequencies -- | 204.9583  | 205.1640 | 220.0928 |
| Frequencies -- | 224.6494  | 227.6965 | 229.0436 |
| Frequencies -- | 235.5118  | 245.9104 | 249.1066 |
| Frequencies -- | 264.1521  | 265.7260 | 265.9992 |
| Frequencies -- | 267.5679  | 269.4096 | 271.8252 |
| Frequencies -- | 275.9898  | 276.2916 | 282.0278 |
| Frequencies -- | 284.9825  | 287.6951 | 289.1447 |
| Frequencies -- | 298.2598  | 299.3571 | 302.5475 |
| Frequencies -- | 303.0312  | 303.7464 | 307.3134 |
| Frequencies -- | 314.2444  | 318.3142 | 320.7958 |
| Frequencies -- | 328.6240  | 332.9305 | 336.0860 |
| Frequencies -- | 351.8524  | 368.0936 | 373.4594 |
| Frequencies -- | 375.0106  | 381.1511 | 384.4151 |
| Frequencies -- | 403.6379  | 409.7859 | 421.5297 |
| Frequencies -- | 424.3257  | 431.4834 | 433.1566 |
| Frequencies -- | 433.3641  | 439.1359 | 440.2229 |
| Frequencies -- | 450.4621  | 454.3023 | 484.2012 |
| Frequencies -- | 496.2865  | 501.4833 | 504.5345 |
| Frequencies -- | 519.9049  | 527.5591 | 536.6473 |
| Frequencies -- | 539.7776  | 542.0656 | 551.1318 |
| Frequencies -- | 551.8943  | 552.1534 | 567.4055 |
| Frequencies -- | 581.2504  | 586.8016 | 591.4764 |
| Frequencies -- | 602.7641  | 608.4134 | 617.4000 |
| Frequencies -- | 628.6718  | 637.1965 | 642.0902 |
| Frequencies -- | 644.5889  | 646.4428 | 658.0638 |
| Frequencies -- | 669.9019  | 689.1515 | 696.3083 |
| Frequencies -- | 711.6632  | 717.3310 | 719.2322 |

|                |           |           |           |
|----------------|-----------|-----------|-----------|
| Frequencies -- | 738.5242  | 743.5444  | 751.3230  |
| Frequencies -- | 767.8951  | 769.6117  | 782.8766  |
| Frequencies -- | 790.2303  | 799.8990  | 806.7411  |
| Frequencies -- | 820.1168  | 833.2018  | 866.7631  |
| Frequencies -- | 872.1439  | 887.8413  | 888.8968  |
| Frequencies -- | 896.9832  | 902.4851  | 907.6930  |
| Frequencies -- | 916.5948  | 923.9742  | 930.2728  |
| Frequencies -- | 964.3487  | 967.0574  | 967.9511  |
| Frequencies -- | 984.4146  | 992.0393  | 995.2441  |
| Frequencies -- | 998.3679  | 999.7210  | 1031.9809 |
| Frequencies -- | 1039.1451 | 1040.5948 | 1042.8240 |
| Frequencies -- | 1044.8660 | 1046.6768 | 1047.2360 |
| Frequencies -- | 1053.9459 | 1055.6388 | 1057.1950 |
| Frequencies -- | 1058.2615 | 1060.9706 | 1086.4620 |
| Frequencies -- | 1087.5071 | 1087.7711 | 1090.3976 |
| Frequencies -- | 1093.4307 | 1115.8380 | 1124.4116 |
| Frequencies -- | 1151.7823 | 1170.9127 | 1172.8261 |
| Frequencies -- | 1175.5361 | 1183.3192 | 1187.2719 |
| Frequencies -- | 1190.9595 | 1195.4848 | 1209.1009 |
| Frequencies -- | 1215.0299 | 1223.9283 | 1245.7204 |
| Frequencies -- | 1247.7032 | 1278.7205 | 1280.1911 |
| Frequencies -- | 1294.6350 | 1312.1611 | 1317.2487 |
| Frequencies -- | 1327.4624 | 1328.9120 | 1339.1453 |
| Frequencies -- | 1342.2033 | 1352.3027 | 1356.4306 |
| Frequencies -- | 1357.2727 | 1360.5600 | 1362.5060 |
| Frequencies -- | 1369.3886 | 1369.8879 | 1376.8954 |
| Frequencies -- | 1386.0816 | 1410.5654 | 1414.8441 |
| Frequencies -- | 1415.3305 | 1422.7361 | 1423.4369 |
| Frequencies -- | 1426.5605 | 1427.8150 | 1433.1077 |
| Frequencies -- | 1433.2494 | 1438.0868 | 1443.5659 |
| Frequencies -- | 1445.3637 | 1450.0740 | 1457.6721 |
| Frequencies -- | 1459.9922 | 1461.9266 | 1471.1987 |
| Frequencies -- | 1472.8462 | 1481.6159 | 1482.2703 |
| Frequencies -- | 1482.9333 | 1484.2630 | 1487.1257 |
| Frequencies -- | 1491.3097 | 1491.8842 | 1492.7878 |
| Frequencies -- | 1493.2632 | 1497.1634 | 1499.6690 |
| Frequencies -- | 1501.4478 | 1502.7361 | 1506.2650 |
| Frequencies -- | 1508.6740 | 1510.5914 | 1514.3337 |
| Frequencies -- | 1520.2288 | 1574.7769 | 1583.0154 |
| Frequencies -- | 1583.7095 | 1596.7544 | 1597.3986 |
| Frequencies -- | 1613.3835 | 1620.1904 | 1622.4500 |
| Frequencies -- | 3000.2263 | 3003.7557 | 3010.3702 |
| Frequencies -- | 3010.8922 | 3011.2488 | 3012.0554 |
| Frequencies -- | 3014.3730 | 3016.3897 | 3016.9825 |
| Frequencies -- | 3018.1740 | 3025.1292 | 3034.8400 |
| Frequencies -- | 3060.1905 | 3065.7175 | 3074.1878 |
| Frequencies -- | 3083.5307 | 3092.3380 | 3098.9394 |
| Frequencies -- | 3102.6410 | 3104.0354 | 3108.3847 |
| Frequencies -- | 3112.9342 | 3120.4180 | 3120.5035 |
| Frequencies -- | 3143.8406 | 3147.5854 | 3153.7288 |
| Frequencies -- | 3156.8107 | 3166.2823 | 3168.8585 |
| Frequencies -- | 3170.6477 | 3173.9104 | 3184.3299 |
| Frequencies -- | 3200.4771 | 3206.2711 | 3229.7400 |

**proximal conformation**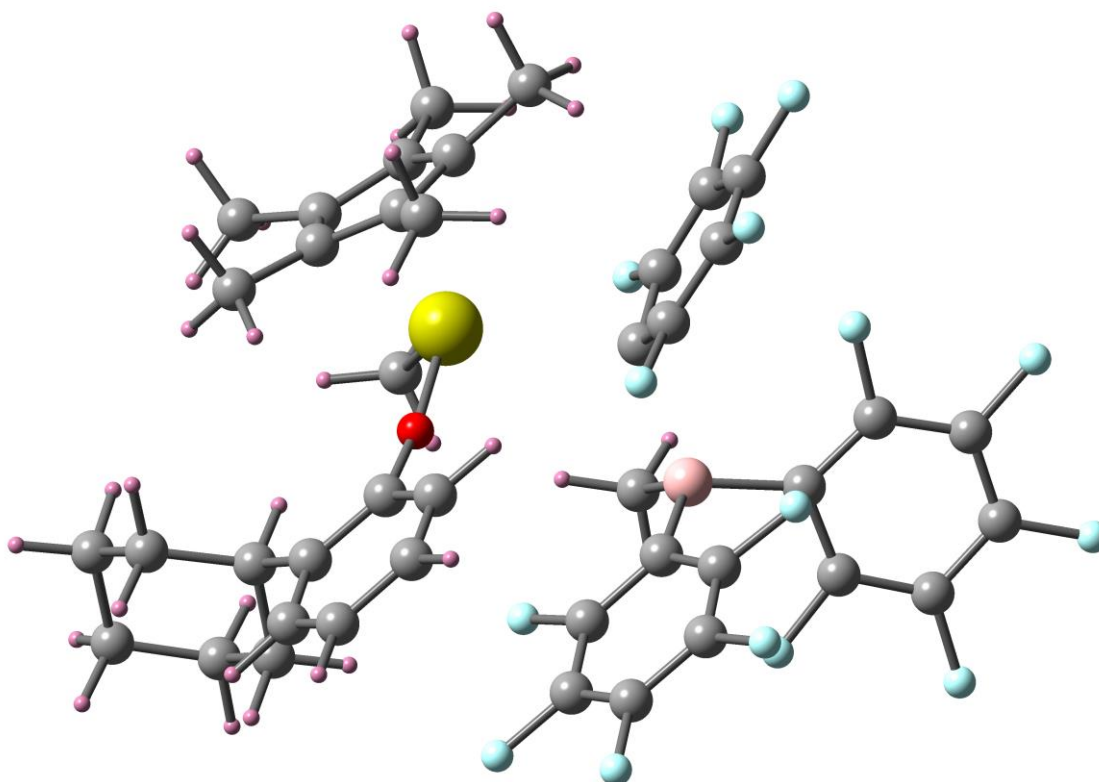

| <b>vacuum</b> | <b>toluene-like solvent</b> | <b>D3 dispersion</b> |
|---------------|-----------------------------|----------------------|
| -3276.8824095 | -3276.8920442               | -0.66368715          |

Imaginary frequency corresponding to vibration along the reaction coordinate:  $-238 \text{ cm}^{-1}$ .

|    |             |             |             |
|----|-------------|-------------|-------------|
| Ti | -1.65456100 | 1.58027000  | -0.28566900 |
| C  | -1.98770700 | 1.16537100  | -2.28829600 |
| H  | -1.55431700 | 0.15691200  | -2.37010500 |
| H  | -3.02422300 | 1.13077100  | -2.64003000 |
| H  | -1.41206700 | 1.88204900  | -2.89608800 |
| O  | -2.28399600 | 0.06614000  | 0.39785500  |
| C  | -2.89891800 | -0.91863800 | 1.17709400  |
| C  | -2.41451200 | -1.06865100 | 2.50264700  |
| C  | -3.93688500 | -1.75412500 | 0.65890600  |
| C  | -2.94916400 | -2.05504900 | 3.34756400  |
| C  | -4.44702800 | -2.73923600 | 1.54580800  |
| C  | -3.97464100 | -2.89679800 | 2.86277900  |
| H  | -2.56177300 | -2.17269900 | 4.36137000  |
| H  | -5.23073300 | -3.40863000 | 1.19003600  |
| C  | -1.58173500 | 3.95955500  | 0.60955200  |
| C  | -2.04437400 | 4.05043900  | -0.75270800 |
| C  | -2.50317100 | 3.12422000  | 1.34903700  |
| C  | -3.29155700 | 3.32622700  | -0.84863300 |
| C  | -3.57793900 | 2.75491600  | 0.45434900  |
| F  | 7.71909900  | -1.56910200 | -1.37361900 |
| C  | 6.36311900  | -1.31391700 | -1.23058000 |
| C  | 5.91180300  | -0.08477900 | -0.72821200 |

|   |             |             |             |
|---|-------------|-------------|-------------|
| C | 5.40857600  | -2.28247100 | -1.58278800 |
| C | 4.52751400  | 0.14930700  | -0.59547000 |
| F | 6.83008300  | 0.89109700  | -0.35717900 |
| C | 4.04006300  | -1.99268600 | -1.43122900 |
| F | 5.82280100  | -3.51460900 | -2.07500700 |
| C | 3.51532500  | -0.76653500 | -0.93974200 |
| F | 4.19764900  | 1.39636000  | -0.05173200 |
| F | 3.16943800  | -3.03255000 | -1.79574500 |
| B | 1.84638800  | -0.65046300 | -0.95898200 |
| C | 1.09649200  | 1.25738700  | -0.14182700 |
| C | 1.57331900  | 2.37402200  | -0.87839700 |
| C | 1.28531900  | 1.41591800  | 1.25599200  |
| C | 2.26702900  | 3.46584600  | -0.33028800 |
| F | 1.36815900  | 2.43242500  | -2.26944200 |
| C | 1.99841000  | 2.45969000  | 1.86712100  |
| F | 0.69538200  | 0.48976200  | 2.13852700  |
| C | 2.51155300  | 3.48718800  | 1.05415100  |
| F | 2.69486100  | 4.53384300  | -1.11575800 |
| F | 2.15799900  | 2.53539700  | 3.24789800  |
| F | 3.18343800  | 4.55211400  | 1.62454900  |
| C | 1.23768800  | -1.78098400 | 0.04923500  |
| C | 0.18165900  | -2.65432700 | -0.29691600 |
| C | 1.84369300  | -2.09897500 | 1.29124300  |
| C | -0.23251200 | -3.74790700 | 0.48688000  |
| C | 1.45342000  | -3.16567100 | 2.12008500  |
| C | 0.40563800  | -4.00644500 | 1.70964300  |
| F | 2.90153200  | -1.31914800 | 1.77190500  |
| F | 2.08845300  | -3.39661700 | 3.33517200  |
| F | -0.00341300 | -5.06398100 | 2.50836300  |
| F | -1.27119100 | -4.57287400 | 0.06601100  |
| F | -0.52615300 | -2.47373700 | -1.49156700 |
| C | 1.39760700  | -0.59106900 | -2.50448900 |
| H | 0.34009000  | -0.38541600 | -2.66951500 |
| H | 1.98178600  | 0.16142200  | -3.05127800 |
| H | 1.60900200  | -1.56599400 | -2.97129800 |
| C | -0.54692500 | 4.86157200  | 1.23891800  |
| H | -1.06404000 | 5.76880600  | 1.59993500  |
| H | -0.05325400 | 4.41849100  | 2.11043500  |
| H | 0.21653300  | 5.19864000  | 0.53088500  |
| C | -1.42119900 | 4.89312900  | -1.84314200 |
| H | -1.71208700 | 5.95087700  | -1.71698400 |
| H | -0.32418600 | 4.85635100  | -1.83236000 |
| H | -1.75091300 | 4.58365300  | -2.84300400 |
| C | -2.46978200 | 2.89245700  | 2.84354900  |
| H | -3.02002300 | 1.99091600  | 3.13874200  |
| H | -1.44641900 | 2.80280900  | 3.23463500  |
| H | -2.94006800 | 3.74498400  | 3.36503100  |
| C | -4.25602800 | 3.39518800  | -2.00879700 |
| H | -4.87398700 | 4.30540200  | -1.91467300 |
| H | -3.74604100 | 3.44866100  | -2.97882700 |
| H | -4.94273500 | 2.53932200  | -2.03623800 |
| C | -4.88209000 | 2.11945900  | 0.87195000  |
| H | -4.75341400 | 1.35779500  | 1.64992100  |
| H | -5.54956400 | 2.89730000  | 1.28304000  |
| H | -5.40752100 | 1.65390500  | 0.03088700  |
| H | -4.39439100 | -3.67616900 | 3.50148800  |
| H | -1.60550400 | -0.42618100 | 2.84403600  |

|   |             |             |             |
|---|-------------|-------------|-------------|
| C | -4.48604200 | -1.64224000 | -0.76843100 |
| C | -4.12951600 | -2.89215900 | -1.63838000 |
| C | -6.03114700 | -1.41156600 | -0.80313700 |
| H | -4.01204100 | -0.77388600 | -1.24653900 |
| C | -4.65370500 | -2.74693800 | -3.08864600 |
| H | -4.57038700 | -3.79487300 | -1.18164600 |
| H | -3.04258200 | -3.04273000 | -1.64674500 |
| C | -6.55512200 | -1.25578700 | -2.25346800 |
| H | -6.54502700 | -2.26675500 | -0.33325300 |
| H | -6.29786700 | -0.52421300 | -0.20732400 |
| C | -6.17683500 | -2.47329500 | -3.13251400 |
| H | -4.41761800 | -3.66420300 | -3.65443700 |
| H | -4.11728600 | -1.92211800 | -3.59258600 |
| H | -7.65105700 | -1.12520400 | -2.23728900 |
| H | -6.13450400 | -0.33715600 | -2.70405000 |
| H | -6.50363200 | -2.30514600 | -4.17290800 |
| H | -6.71919100 | -3.36571400 | -2.77034900 |

|                |           |          |          |
|----------------|-----------|----------|----------|
| Frequencies -- | -238.2057 | -11.1596 | 10.7784  |
| Frequencies -- | 16.9591   | 24.6565  | 28.1182  |
| Frequencies -- | 31.2938   | 33.9919  | 37.2169  |
| Frequencies -- | 42.6570   | 43.8035  | 47.3438  |
| Frequencies -- | 49.6357   | 53.7048  | 57.1350  |
| Frequencies -- | 61.6037   | 66.3347  | 84.4837  |
| Frequencies -- | 88.0527   | 89.4594  | 96.7628  |
| Frequencies -- | 97.5693   | 104.6232 | 109.4628 |
| Frequencies -- | 110.9563  | 113.1678 | 118.7413 |
| Frequencies -- | 122.2345  | 124.3022 | 126.5537 |
| Frequencies -- | 134.0198  | 139.6767 | 144.0482 |
| Frequencies -- | 151.3169  | 154.1194 | 156.8574 |
| Frequencies -- | 165.0191  | 167.2102 | 174.6654 |
| Frequencies -- | 177.1454  | 186.4614 | 190.5950 |
| Frequencies -- | 195.8445  | 200.8271 | 203.8265 |
| Frequencies -- | 211.0638  | 220.7697 | 225.2087 |
| Frequencies -- | 229.0863  | 236.8839 | 237.2068 |
| Frequencies -- | 243.3443  | 264.1720 | 265.6534 |
| Frequencies -- | 266.4839  | 267.5303 | 269.1932 |
| Frequencies -- | 272.5701  | 275.5327 | 278.0684 |
| Frequencies -- | 279.2178  | 282.9916 | 287.3611 |
| Frequencies -- | 292.7819  | 298.1127 | 299.3437 |
| Frequencies -- | 303.6234  | 305.8612 | 310.6155 |
| Frequencies -- | 314.0954  | 316.3234 | 317.9137 |
| Frequencies -- | 327.3150  | 334.4179 | 337.4571 |
| Frequencies -- | 349.2157  | 368.8064 | 375.1693 |
| Frequencies -- | 380.7863  | 381.7752 | 383.6633 |
| Frequencies -- | 399.7000  | 412.9209 | 422.0650 |
| Frequencies -- | 425.0969  | 431.5419 | 434.0538 |
| Frequencies -- | 436.9100  | 439.5069 | 443.0624 |
| Frequencies -- | 449.9170  | 454.7399 | 483.8891 |
| Frequencies -- | 496.3704  | 498.3552 | 505.1678 |
| Frequencies -- | 521.0346  | 528.0362 | 536.1045 |
| Frequencies -- | 539.4442  | 542.1572 | 551.7286 |
| Frequencies -- | 552.4906  | 554.3410 | 571.8762 |
| Frequencies -- | 580.8181  | 589.3078 | 591.5098 |
| Frequencies -- | 604.7734  | 615.4957 | 617.1314 |
| Frequencies -- | 629.1904  | 637.1829 | 641.0111 |
| Frequencies -- | 643.8694  | 650.5372 | 656.1089 |
| Frequencies -- | 670.3271  | 690.5907 | 696.3489 |
| Frequencies -- | 715.3442  | 717.8444 | 719.5986 |
| Frequencies -- | 738.4693  | 742.3789 | 751.4096 |
| Frequencies -- | 768.8193  | 770.7472 | 781.5691 |

|                |           |           |           |
|----------------|-----------|-----------|-----------|
| Frequencies -- | 790.6938  | 802.2795  | 805.1032  |
| Frequencies -- | 820.1831  | 826.8582  | 866.4140  |
| Frequencies -- | 873.3888  | 886.4899  | 889.4581  |
| Frequencies -- | 897.5045  | 901.0815  | 907.4160  |
| Frequencies -- | 915.3471  | 924.8644  | 934.7672  |
| Frequencies -- | 964.2620  | 966.0037  | 972.9260  |
| Frequencies -- | 982.7539  | 987.2246  | 995.6936  |
| Frequencies -- | 996.6750  | 997.8653  | 1031.5418 |
| Frequencies -- | 1038.5867 | 1040.1906 | 1043.1443 |
| Frequencies -- | 1044.8942 | 1045.2285 | 1047.8233 |
| Frequencies -- | 1052.8707 | 1053.5288 | 1055.4269 |
| Frequencies -- | 1058.5469 | 1059.6457 | 1085.1908 |
| Frequencies -- | 1087.5729 | 1087.8968 | 1089.7008 |
| Frequencies -- | 1093.2542 | 1115.1457 | 1125.6561 |
| Frequencies -- | 1152.1723 | 1171.7362 | 1172.5284 |
| Frequencies -- | 1175.3526 | 1181.3835 | 1184.4619 |
| Frequencies -- | 1191.2175 | 1196.4451 | 1211.5562 |
| Frequencies -- | 1214.3021 | 1223.7943 | 1243.1805 |
| Frequencies -- | 1245.9083 | 1278.3760 | 1281.8347 |
| Frequencies -- | 1292.5310 | 1311.1878 | 1312.6489 |
| Frequencies -- | 1326.9379 | 1328.9633 | 1339.1741 |
| Frequencies -- | 1345.0673 | 1347.9954 | 1354.5375 |
| Frequencies -- | 1357.4803 | 1360.0483 | 1361.4703 |
| Frequencies -- | 1364.0453 | 1370.3319 | 1379.0474 |
| Frequencies -- | 1385.0931 | 1411.1821 | 1414.8741 |
| Frequencies -- | 1415.6349 | 1423.8984 | 1425.3842 |
| Frequencies -- | 1425.9488 | 1428.1100 | 1429.5366 |
| Frequencies -- | 1432.2150 | 1433.4536 | 1444.7502 |
| Frequencies -- | 1446.7193 | 1449.5394 | 1451.6497 |
| Frequencies -- | 1456.7599 | 1462.7854 | 1471.5175 |
| Frequencies -- | 1473.0289 | 1480.4446 | 1481.3971 |
| Frequencies -- | 1482.1848 | 1484.9657 | 1488.1666 |
| Frequencies -- | 1490.6546 | 1491.6195 | 1493.2419 |
| Frequencies -- | 1494.6868 | 1495.6905 | 1500.7526 |
| Frequencies -- | 1502.3771 | 1502.8074 | 1506.8927 |
| Frequencies -- | 1508.4469 | 1510.6129 | 1514.5414 |
| Frequencies -- | 1520.5443 | 1574.6432 | 1582.3934 |
| Frequencies -- | 1586.0776 | 1596.9476 | 1599.2212 |
| Frequencies -- | 1612.6776 | 1621.0885 | 1622.2633 |
| Frequencies -- | 2992.7835 | 3001.5367 | 3004.7137 |
| Frequencies -- | 3006.6967 | 3008.5010 | 3011.0341 |
| Frequencies -- | 3012.1608 | 3012.3075 | 3013.8084 |
| Frequencies -- | 3022.2368 | 3028.4242 | 3038.5492 |
| Frequencies -- | 3059.3862 | 3064.2187 | 3075.3996 |
| Frequencies -- | 3076.6341 | 3094.9144 | 3096.6180 |
| Frequencies -- | 3105.0171 | 3108.5533 | 3116.9199 |
| Frequencies -- | 3117.4700 | 3121.9013 | 3132.2010 |
| Frequencies -- | 3134.9692 | 3145.8838 | 3146.8547 |
| Frequencies -- | 3151.6915 | 3165.6417 | 3167.2192 |
| Frequencies -- | 3167.9323 | 3178.0440 | 3182.9162 |
| Frequencies -- | 3198.8152 | 3212.2005 | 3226.5757 |



**Catalyst 14:**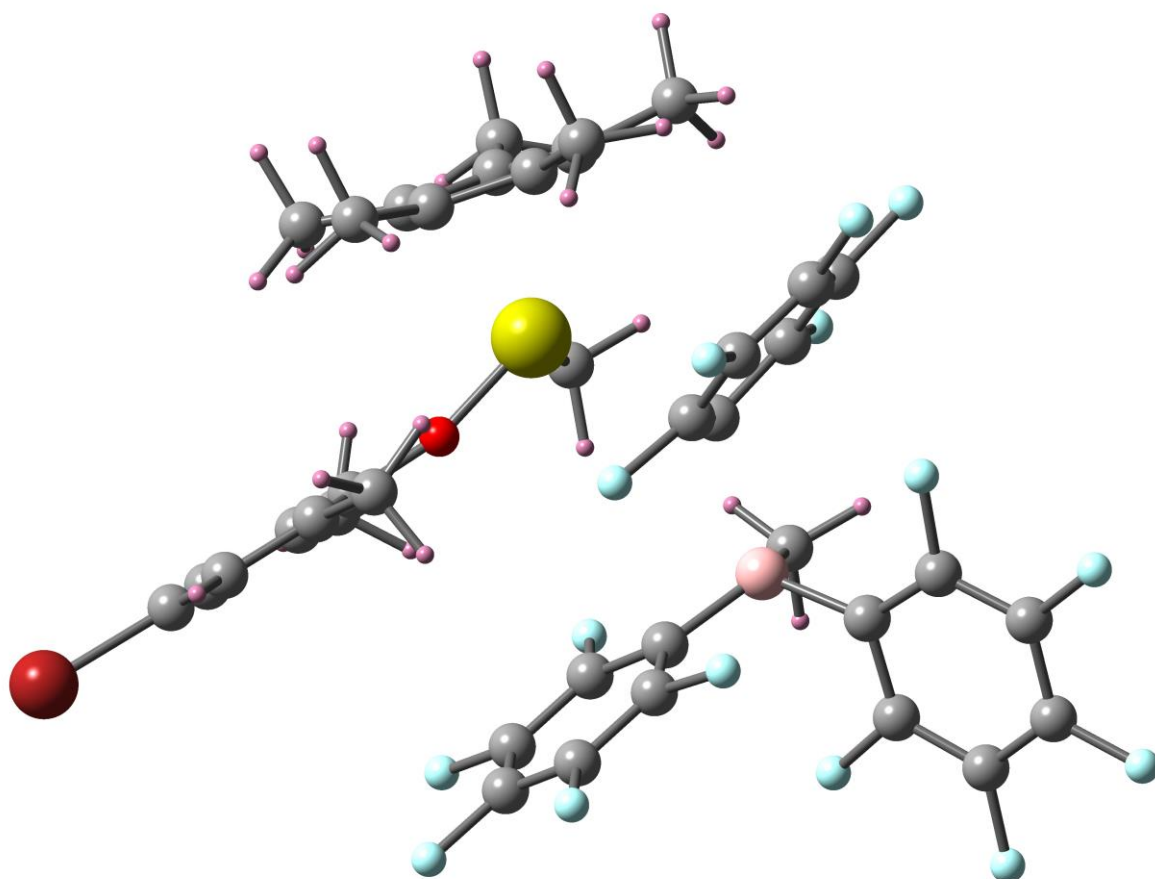

| vacuum        | toluene-like solvent | D3 dispersion |
|---------------|----------------------|---------------|
| -3133.4832388 | -3133.493375         | -0.60353985   |

Imaginary frequency corresponding to vibration along the reaction coordinate:  $-241 \text{ cm}^{-1}$ .

|    |             |             |             |
|----|-------------|-------------|-------------|
| Ti | -0.98329200 | 2.13442100  | -0.66126400 |
| C  | -0.74351900 | 1.90988700  | -2.69990800 |
| H  | -0.51729300 | 0.83627400  | -2.76128800 |
| H  | -1.59520200 | 2.13531500  | -3.34981700 |
| H  | 0.12919600  | 2.50311800  | -3.01288600 |
| O  | -2.10477100 | 0.77831800  | -0.33819900 |
| C  | -3.20661500 | -0.03536700 | -0.05760400 |
| C  | -3.46273300 | -0.44748400 | 1.28600700  |
| C  | -4.04339400 | -0.45845400 | -1.13935100 |
| C  | -4.60882700 | -1.23963800 | 1.53758500  |
| C  | -5.17429900 | -1.25185900 | -0.84120600 |
| C  | -5.45597900 | -1.62394900 | 0.48565000  |
| H  | -4.81704600 | -1.55865500 | 2.55851500  |
| H  | -5.81890000 | -1.58310100 | -1.65432300 |
| C  | -0.83692300 | 4.24812900  | 0.65932600  |
| C  | -0.50759000 | 4.61365900  | -0.70012500 |
| C  | -2.19170000 | 3.74115600  | 0.67347900  |
| C  | -1.66399500 | 4.34771000  | -1.52465000 |
| C  | -2.70250200 | 3.79578200  | -0.67775200 |

|    |             |             |             |
|----|-------------|-------------|-------------|
| F  | 7.44282000  | -3.29801000 | 0.03718700  |
| C  | 6.21007800  | -2.69621800 | -0.16763000 |
| C  | 5.91867800  | -1.44550100 | 0.39659600  |
| C  | 5.22500100  | -3.32545100 | -0.94714000 |
| C  | 4.65832500  | -0.85321200 | 0.17204300  |
| F  | 6.87074000  | -0.79996300 | 1.17713300  |
| C  | 3.98569100  | -2.68838200 | -1.13814900 |
| F  | 5.48251000  | -4.56518600 | -1.51964100 |
| C  | 3.62637100  | -1.42600900 | -0.59516600 |
| F  | 4.47543600  | 0.38492700  | 0.79971000  |
| F  | 3.06432500  | -3.39374500 | -1.92988100 |
| B  | 2.14064500  | -0.85129400 | -1.07338800 |
| C  | 1.59845100  | 1.11803700  | -0.04165800 |
| C  | 2.45168300  | 2.17656100  | -0.44422900 |
| C  | 1.48019200  | 1.02910000  | 1.36722300  |
| C  | 3.18348600  | 3.00148000  | 0.42813100  |
| F  | 2.61800400  | 2.46150800  | -1.81270500 |
| C  | 2.18670500  | 1.81025700  | 2.29772200  |
| F  | 0.57290800  | 0.10851300  | 1.92306500  |
| C  | 3.06031700  | 2.80107700  | 1.81501300  |
| F  | 4.00593700  | 4.02313600  | -0.04244700 |
| F  | 2.01220700  | 1.65959700  | 3.67084100  |
| F  | 3.74939200  | 3.61249800  | 2.69906800  |
| C  | -2.53884300 | -0.13774100 | 2.44954900  |
| H  | -1.96209300 | 0.77738800  | 2.30320100  |
| H  | -3.10775100 | -0.04755500 | 3.38599600  |
| H  | -1.80986200 | -0.95112800 | 2.58561800  |
| C  | -3.74687300 | -0.12366900 | -2.58973200 |
| H  | -3.66681200 | 0.95769300  | -2.75621800 |
| H  | -2.79921300 | -0.57562000 | -2.91165600 |
| H  | -4.54000300 | -0.50881500 | -3.24425000 |
| C  | 0.95963500  | -1.85719400 | -0.57513000 |
| C  | -0.13470600 | -2.24598000 | -1.38167800 |
| C  | 1.02295100  | -2.56128300 | 0.65548200  |
| C  | -1.07854700 | -3.22827000 | -1.02654300 |
| C  | 0.09678600  | -3.53871600 | 1.06289900  |
| C  | -0.96584600 | -3.88257100 | 0.21009800  |
| F  | 2.05493400  | -2.30174200 | 1.56114300  |
| F  | 0.22067500  | -4.16804500 | 2.29628200  |
| F  | -1.89280300 | -4.84086000 | 0.58912100  |
| F  | -2.12424500 | -3.54996800 | -1.88645400 |
| F  | -0.34569900 | -1.65304000 | -2.63452300 |
| C  | 2.26888200  | -0.41554200 | -2.61590600 |
| H  | 1.42681700  | 0.14884200  | -3.01774000 |
| H  | 3.18257300  | 0.17139700  | -2.78194200 |
| H  | 2.35975700  | -1.33249900 | -3.22234800 |
| Br | -7.04655200 | -2.71028000 | 0.87010700  |
| C  | -0.04571600 | 4.58452700  | 1.90307800  |
| H  | -0.48332600 | 5.48517800  | 2.36784700  |
| H  | -0.07459800 | 3.79305400  | 2.66356300  |
| H  | 1.00196600  | 4.81653300  | 1.68955600  |
| C  | 0.72818100  | 5.34148200  | -1.17964300 |
| H  | 0.46515400  | 6.38322400  | -1.43166000 |
| H  | 1.51618000  | 5.38293100  | -0.42108400 |
| H  | 1.16290300  | 4.89388700  | -2.08445300 |
| C  | -3.00908400 | 3.47101400  | 1.91527700  |
| H  | -3.80256300 | 2.73259900  | 1.74939700  |

|   |             |            |             |
|---|-------------|------------|-------------|
| H | -2.39590600 | 3.12543400 | 2.75743300  |
| H | -3.49847900 | 4.40731000 | 2.23752400  |
| C | -1.83783300 | 4.83323900 | -2.94297100 |
| H | -2.10715700 | 5.90395300 | -2.92663200 |
| H | -0.91776400 | 4.74082400 | -3.53449000 |
| H | -2.63735800 | 4.30464300 | -3.47742700 |
| C | -4.13720900 | 3.55191200 | -1.08392200 |
| H | -4.61266400 | 2.75819900 | -0.49462300 |
| H | -4.72664200 | 4.47221700 | -0.92596100 |
| H | -4.23358600 | 3.28814500 | -2.14474400 |

|                |           |           |           |
|----------------|-----------|-----------|-----------|
| Frequencies -- | -240.6227 | 11.5581   | 15.0050   |
| Frequencies -- | 16.1027   | 17.7608   | 26.5659   |
| Frequencies -- | 30.6557   | 34.7200   | 36.8827   |
| Frequencies -- | 41.4217   | 46.8310   | 48.5222   |
| Frequencies -- | 57.1863   | 62.2074   | 67.7295   |
| Frequencies -- | 73.1624   | 84.3769   | 90.4697   |
| Frequencies -- | 91.5326   | 97.0800   | 104.4763  |
| Frequencies -- | 110.8364  | 112.6423  | 113.7756  |
| Frequencies -- | 121.3095  | 125.5400  | 128.6064  |
| Frequencies -- | 132.5126  | 135.2097  | 141.5601  |
| Frequencies -- | 147.3968  | 149.5784  | 153.3738  |
| Frequencies -- | 157.3335  | 162.5432  | 164.8704  |
| Frequencies -- | 169.5174  | 170.1047  | 175.6408  |
| Frequencies -- | 178.9336  | 183.2419  | 189.5140  |
| Frequencies -- | 192.8996  | 197.7754  | 202.4786  |
| Frequencies -- | 204.0634  | 221.0932  | 223.9920  |
| Frequencies -- | 227.5759  | 230.0358  | 239.2280  |
| Frequencies -- | 244.9653  | 260.2741  | 262.7708  |
| Frequencies -- | 263.9294  | 265.7660  | 266.0084  |
| Frequencies -- | 268.2884  | 269.3533  | 270.5288  |
| Frequencies -- | 276.2201  | 276.7264  | 280.0738  |
| Frequencies -- | 290.5970  | 291.9488  | 297.7396  |
| Frequencies -- | 298.8010  | 302.6931  | 303.5775  |
| Frequencies -- | 305.6232  | 316.5579  | 316.8337  |
| Frequencies -- | 327.7945  | 332.1371  | 342.5431  |
| Frequencies -- | 365.1006  | 368.5831  | 376.0876  |
| Frequencies -- | 380.9047  | 383.6295  | 387.7545  |
| Frequencies -- | 407.1338  | 408.8767  | 422.5821  |
| Frequencies -- | 424.8082  | 427.0258  | 431.2327  |
| Frequencies -- | 433.1561  | 439.0758  | 450.0630  |
| Frequencies -- | 454.0582  | 484.2496  | 500.1110  |
| Frequencies -- | 502.1528  | 515.2340  | 528.1672  |
| Frequencies -- | 534.4085  | 540.0796  | 542.4347  |
| Frequencies -- | 550.8980  | 552.4944  | 558.6795  |
| Frequencies -- | 565.1379  | 566.7345  | 572.5408  |
| Frequencies -- | 586.1319  | 587.6163  | 593.1669  |
| Frequencies -- | 600.9288  | 610.8217  | 629.3287  |
| Frequencies -- | 637.1147  | 642.2167  | 644.3041  |
| Frequencies -- | 646.2949  | 667.6790  | 685.9378  |
| Frequencies -- | 688.0249  | 711.4331  | 717.3943  |
| Frequencies -- | 719.8128  | 730.3496  | 740.1616  |
| Frequencies -- | 751.7650  | 783.5614  | 796.7879  |
| Frequencies -- | 800.7313  | 807.7969  | 836.9610  |
| Frequencies -- | 886.0507  | 886.9546  | 891.1472  |
| Frequencies -- | 895.8438  | 907.7304  | 914.8330  |
| Frequencies -- | 917.0150  | 951.4208  | 962.4767  |
| Frequencies -- | 972.3035  | 982.7285  | 992.2025  |
| Frequencies -- | 1000.1486 | 1010.6818 | 1030.9487 |
| Frequencies -- | 1038.4954 | 1040.6250 | 1043.4350 |
| Frequencies -- | 1044.7921 | 1046.6675 | 1049.2463 |
| Frequencies -- | 1049.4472 | 1055.9875 | 1057.7951 |

|                |           |           |           |
|----------------|-----------|-----------|-----------|
| Frequencies -- | 1062.0977 | 1065.6416 | 1085.3859 |
| Frequencies -- | 1087.4641 | 1093.8403 | 1123.8223 |
| Frequencies -- | 1127.5339 | 1171.0710 | 1171.6896 |
| Frequencies -- | 1174.9238 | 1184.0913 | 1191.6996 |
| Frequencies -- | 1216.2282 | 1224.9391 | 1244.6174 |
| Frequencies -- | 1267.7524 | 1283.0411 | 1313.3247 |
| Frequencies -- | 1328.1597 | 1341.5068 | 1343.6674 |
| Frequencies -- | 1350.0705 | 1358.9743 | 1369.0381 |
| Frequencies -- | 1375.0232 | 1411.4819 | 1414.4358 |
| Frequencies -- | 1415.0045 | 1416.4956 | 1420.4381 |
| Frequencies -- | 1421.7638 | 1422.7512 | 1425.3235 |
| Frequencies -- | 1427.0899 | 1429.7303 | 1430.7255 |
| Frequencies -- | 1432.3006 | 1434.6549 | 1436.9243 |
| Frequencies -- | 1445.9779 | 1449.1758 | 1450.5392 |
| Frequencies -- | 1457.2985 | 1461.6830 | 1470.4255 |
| Frequencies -- | 1473.3431 | 1482.2482 | 1489.7895 |
| Frequencies -- | 1491.0275 | 1492.3031 | 1492.9726 |
| Frequencies -- | 1494.3667 | 1498.3713 | 1499.0893 |
| Frequencies -- | 1500.4630 | 1503.6946 | 1505.6220 |
| Frequencies -- | 1506.2289 | 1509.1297 | 1511.7414 |
| Frequencies -- | 1517.6706 | 1520.6089 | 1576.0962 |
| Frequencies -- | 1583.9803 | 1584.1795 | 1588.8743 |
| Frequencies -- | 1595.9934 | 1597.7333 | 1619.2583 |
| Frequencies -- | 1622.8598 | 3009.3323 | 3011.9834 |
| Frequencies -- | 3013.5783 | 3017.0699 | 3018.0767 |
| Frequencies -- | 3019.4775 | 3028.3908 | 3038.7370 |
| Frequencies -- | 3045.7469 | 3103.5911 | 3105.0118 |
| Frequencies -- | 3105.8121 | 3107.8355 | 3108.6722 |
| Frequencies -- | 3115.6636 | 3117.9564 | 3142.7143 |
| Frequencies -- | 3144.5404 | 3147.4614 | 3149.5563 |
| Frequencies -- | 3153.4842 | 3157.0731 | 3166.3442 |
| Frequencies -- | 3173.7272 | 3174.2528 | 3193.4502 |
| Frequencies -- | 3198.6721 | 3201.8577 | 3205.2627 |

**Catalyst 15:****distal conformation**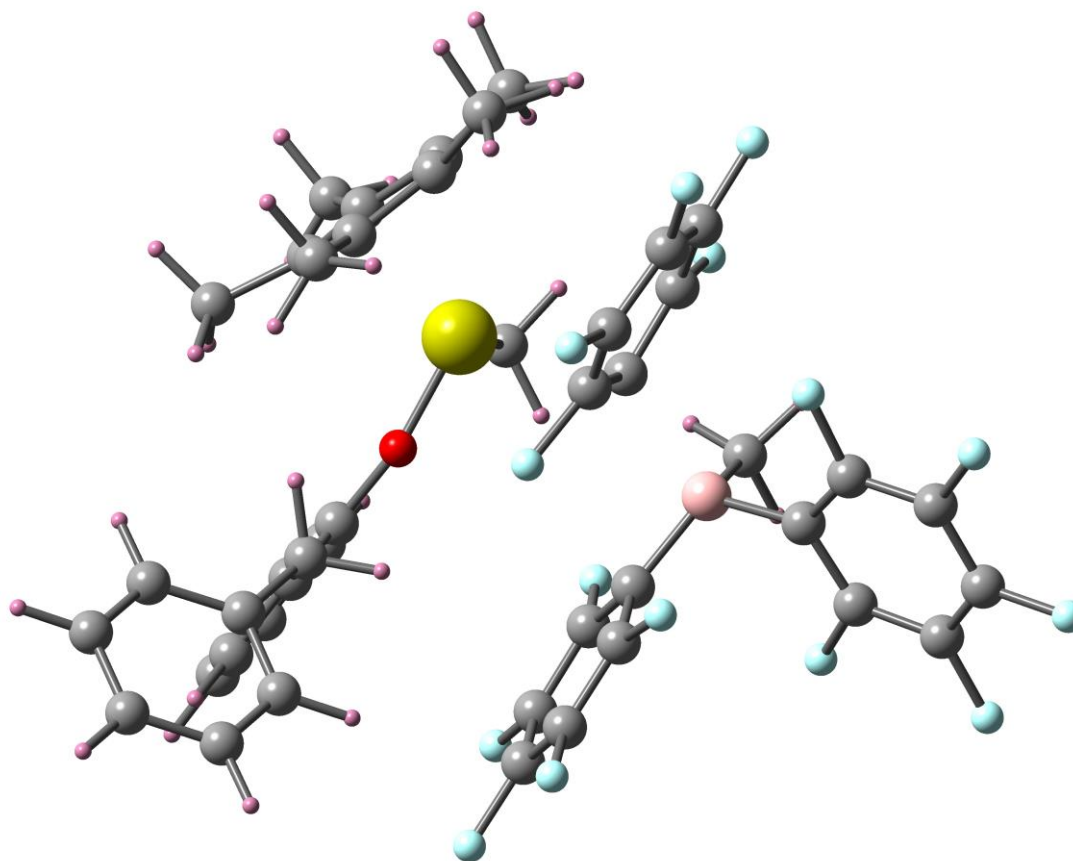

| <b>vacuum</b> | <b>toluene-like solvent</b> | <b>D3 dispersion</b> |
|---------------|-----------------------------|----------------------|
| -3312.5761539 | -3312.5868124               | -0.65408415          |

Imaginary frequency corresponding to vibration along the reaction coordinate:  $-235 \text{ cm}^{-1}$ .

|    |             |             |             |
|----|-------------|-------------|-------------|
| Ti | -1.26122700 | 1.98464000  | -0.88805000 |
| C  | -0.81918100 | 2.04267600  | -2.91014800 |
| H  | -0.33829600 | 1.06569000  | -3.05422400 |
| H  | -1.64601800 | 2.13860700  | -3.62303300 |
| H  | -0.09366300 | 2.85390400  | -3.07661100 |
| O  | -2.12788000 | 0.43029400  | -0.91613800 |
| C  | -3.02648900 | -0.58586500 | -1.24648400 |
| C  | -3.57413200 | -1.44773500 | -0.24642000 |
| C  | -3.35268400 | -0.74121200 | -2.61648100 |
| C  | -4.45425300 | -2.46272900 | -0.69360800 |
| C  | -4.23416800 | -1.75809700 | -3.02254400 |
| C  | -4.78767000 | -2.62238400 | -2.05503500 |
| H  | -4.88275500 | -3.14375800 | 0.04046000  |
| H  | -4.47028900 | -1.88140300 | -4.08111000 |
| C  | -1.48346600 | 4.19868600  | 0.36494200  |
| C  | -1.53983200 | 4.52674100  | -1.03554600 |
| C  | -2.57522300 | 3.29096400  | 0.66133100  |

|   |             |             |             |
|---|-------------|-------------|-------------|
| C | -2.69635200 | 3.86791400  | -1.60221000 |
| C | -3.34501400 | 3.11121400  | -0.55100500 |
| F | 7.48974300  | -2.18593800 | 0.83712800  |
| C | 6.24720000  | -1.71630400 | 0.43809900  |
| C | 5.64908900  | -0.62581700 | 1.08545300  |
| C | 5.55877000  | -2.31948000 | -0.62748600 |
| C | 4.38537500  | -0.16717100 | 0.65959800  |
| F | 6.30298000  | -0.00503200 | 2.14377500  |
| C | 4.30055100  | -1.81949300 | -1.00993100 |
| F | 6.12502100  | -3.40031400 | -1.29291800 |
| C | 3.63464300  | -0.72537500 | -0.39337300 |
| F | 3.89011100  | 0.92257000  | 1.38769900  |
| F | 3.69911100  | -2.48861900 | -2.08831100 |
| B | 2.19499200  | -0.26627800 | -1.11015500 |
| C | 1.17388600  | 1.36058800  | 0.02120400  |
| C | 1.89598100  | 2.58141400  | -0.06790100 |
| C | 0.80972700  | 1.04845600  | 1.35928700  |
| C | 2.33695100  | 3.33850300  | 1.02817500  |
| F | 2.21275100  | 3.11906600  | -1.32707800 |
| C | 1.20818800  | 1.76541700  | 2.50043300  |
| F | -0.03970200 | -0.04314000 | 1.60316800  |
| C | 2.00554400  | 2.91222400  | 2.32622800  |
| F | 3.04995000  | 4.52165300  | 0.85796500  |
| F | 0.80697500  | 1.39259300  | 3.77917800  |
| F | 2.40067500  | 3.65423900  | 3.42138800  |
| C | -3.19518300 | -1.29108000 | 1.23336400  |
| H | -2.12209700 | -1.49916300 | 1.34270900  |
| H | -3.31246900 | -0.23163300 | 1.50190300  |
| C | 1.16013500  | -1.53378000 | -1.07465300 |
| C | 0.41660700  | -1.97780900 | -2.19377100 |
| C | 1.07787300  | -2.41644400 | 0.03293500  |
| C | -0.33179600 | -3.16991100 | -2.23328500 |
| C | 0.31994000  | -3.60114200 | 0.05295600  |
| C | -0.38906200 | -3.98904600 | -1.09568200 |
| F | 1.78785600  | -2.14148600 | 1.20599800  |
| F | 0.26123700  | -4.39192400 | 1.19773800  |
| F | -1.14466600 | -5.15178000 | -1.09787700 |
| F | -1.01820700 | -3.53893100 | -3.38403700 |
| F | 0.39271800  | -1.23202300 | -3.37884800 |
| C | 2.58600100  | 0.42649100  | -2.51354200 |
| H | 1.77282600  | 0.92754300  | -3.04146700 |
| H | 3.39840100  | 1.15331400  | -2.37672600 |
| H | 2.96820400  | -0.35855500 | -3.18624200 |
| C | -0.66346800 | 4.93209600  | 1.40313600  |
| H | -1.23583500 | 5.82196500  | 1.71924700  |
| H | -0.48045200 | 4.34072500  | 2.30667700  |
| H | 0.29604700  | 5.29735400  | 1.02153500  |
| C | -0.64915600 | 5.51439200  | -1.75382400 |
| H | -1.11330100 | 6.51631800  | -1.74467500 |
| H | 0.33536500  | 5.61089200  | -1.28032500 |
| H | -0.49021000 | 5.24469800  | -2.80620100 |
| C | -2.96523800 | 2.83051700  | 2.04804400  |
| H | -3.54278800 | 1.89852000  | 2.03794200  |
| H | -2.09359000 | 2.67190300  | 2.69742100  |
| H | -3.59706600 | 3.59287700  | 2.53655900  |
| C | -3.28525300 | 4.14429000  | -2.96477800 |
| H | -3.97285900 | 5.00561800  | -2.89600300 |

|   |             |             |             |
|---|-------------|-------------|-------------|
| H | -2.52229100 | 4.39984700  | -3.71062600 |
| H | -3.86811100 | 3.29727800  | -3.35017400 |
| C | -4.70615300 | 2.46256200  | -0.65295500 |
| H | -4.86502700 | 1.69716900  | 0.11553200  |
| H | -5.48721200 | 3.23043800  | -0.51441100 |
| H | -4.88138800 | 1.99167300  | -1.62832300 |
| H | -5.46482200 | -3.42370000 | -2.35601300 |
| H | -2.89648500 | -0.08086500 | -3.35124000 |
| C | -3.97503700 | -2.14506200 | 2.23112900  |
| C | -5.26272700 | -1.75202200 | 2.67828200  |
| C | -3.41791800 | -3.33594600 | 2.76023200  |
| C | -5.97434600 | -2.52329700 | 3.62136500  |
| H | -5.71500200 | -0.83639800 | 2.28680800  |
| C | -4.12553800 | -4.11260400 | 3.70445900  |
| H | -2.42416600 | -3.65821800 | 2.44124600  |
| C | -5.40685500 | -3.70926100 | 4.13900800  |
| H | -6.96338500 | -2.19894000 | 3.95423600  |
| H | -3.67361900 | -5.02489700 | 4.10074200  |
| H | -5.95315800 | -4.30671200 | 4.87265100  |

|                |           |          |          |
|----------------|-----------|----------|----------|
| Frequencies -- | -234.5283 | -30.0747 | 10.3058  |
| Frequencies -- | 13.7374   | 16.0062  | 26.6066  |
| Frequencies -- | 28.2186   | 29.1659  | 33.8075  |
| Frequencies -- | 35.3073   | 38.0112  | 39.9375  |
| Frequencies -- | 46.0440   | 49.4603  | 53.2488  |
| Frequencies -- | 56.8937   | 60.0347  | 62.1214  |
| Frequencies -- | 67.2519   | 74.7759  | 85.7231  |
| Frequencies -- | 91.2448   | 91.8816  | 96.9475  |
| Frequencies -- | 103.1230  | 110.6006 | 113.5290 |
| Frequencies -- | 116.8630  | 120.7176 | 126.0496 |
| Frequencies -- | 128.4803  | 131.7057 | 135.2288 |
| Frequencies -- | 144.2487  | 149.0567 | 155.6999 |
| Frequencies -- | 157.8759  | 165.2431 | 166.0908 |
| Frequencies -- | 167.8952  | 177.6691 | 187.0680 |
| Frequencies -- | 196.9085  | 199.7345 | 204.3349 |
| Frequencies -- | 219.8359  | 222.4429 | 226.1739 |
| Frequencies -- | 228.6297  | 234.1130 | 243.3586 |
| Frequencies -- | 260.8787  | 264.0827 | 265.3592 |
| Frequencies -- | 265.9195  | 269.3423 | 271.0180 |
| Frequencies -- | 272.8583  | 276.4365 | 277.4926 |
| Frequencies -- | 282.5808  | 285.3646 | 292.1602 |
| Frequencies -- | 294.2129  | 299.9796 | 303.1975 |
| Frequencies -- | 305.3183  | 306.8983 | 315.5419 |
| Frequencies -- | 316.7861  | 317.7109 | 321.6068 |
| Frequencies -- | 328.0953  | 331.0061 | 334.0940 |
| Frequencies -- | 369.4914  | 371.5670 | 375.2302 |
| Frequencies -- | 380.9026  | 382.5282 | 398.5549 |
| Frequencies -- | 405.8458  | 408.0990 | 421.9448 |
| Frequencies -- | 425.4095  | 431.4353 | 434.3506 |
| Frequencies -- | 441.5977  | 445.4423 | 450.2771 |
| Frequencies -- | 454.3533  | 465.9112 | 485.4824 |
| Frequencies -- | 486.1515  | 501.0366 | 526.3031 |
| Frequencies -- | 535.0804  | 539.1795 | 539.7284 |
| Frequencies -- | 542.8853  | 551.3582 | 551.4035 |
| Frequencies -- | 570.9870  | 571.7482 | 580.1258 |
| Frequencies -- | 589.4278  | 589.7105 | 604.1611 |
| Frequencies -- | 615.5500  | 620.5634 | 624.0617 |
| Frequencies -- | 628.9469  | 637.1952 | 641.2187 |
| Frequencies -- | 644.1748  | 648.2106 | 653.0122 |
| Frequencies -- | 672.3894  | 690.1116 | 698.0412 |
| Frequencies -- | 704.5835  | 710.6624 | 713.4589 |

|                |           |           |           |
|----------------|-----------|-----------|-----------|
| Frequencies -- | 716.6961  | 719.7507  | 737.3811  |
| Frequencies -- | 746.0321  | 749.9911  | 769.6412  |
| Frequencies -- | 781.6278  | 799.6086  | 804.1392  |
| Frequencies -- | 806.2322  | 826.3509  | 831.6242  |
| Frequencies -- | 861.7409  | 867.5304  | 890.0889  |
| Frequencies -- | 897.2216  | 907.4584  | 917.5674  |
| Frequencies -- | 926.0963  | 930.6603  | 938.1147  |
| Frequencies -- | 965.1355  | 968.0167  | 968.6410  |
| Frequencies -- | 985.8666  | 986.7252  | 991.1080  |
| Frequencies -- | 995.7557  | 999.7263  | 1005.8116 |
| Frequencies -- | 1022.0880 | 1035.8360 | 1038.5332 |
| Frequencies -- | 1039.9505 | 1041.6157 | 1042.1061 |
| Frequencies -- | 1044.6414 | 1046.0020 | 1052.5942 |
| Frequencies -- | 1054.1160 | 1057.2138 | 1059.1964 |
| Frequencies -- | 1083.5361 | 1085.3900 | 1085.8855 |
| Frequencies -- | 1094.8899 | 1104.1946 | 1123.4831 |
| Frequencies -- | 1171.1698 | 1173.1701 | 1175.6766 |
| Frequencies -- | 1181.0641 | 1182.8555 | 1187.9922 |
| Frequencies -- | 1192.0157 | 1204.0044 | 1205.7549 |
| Frequencies -- | 1212.3030 | 1213.9204 | 1221.5219 |
| Frequencies -- | 1237.4369 | 1246.5954 | 1284.8696 |
| Frequencies -- | 1311.1402 | 1319.2662 | 1326.9842 |
| Frequencies -- | 1336.3174 | 1341.3071 | 1351.6579 |
| Frequencies -- | 1355.6891 | 1369.4657 | 1374.1215 |
| Frequencies -- | 1380.4301 | 1380.9502 | 1410.9523 |
| Frequencies -- | 1414.0183 | 1414.8597 | 1422.1379 |
| Frequencies -- | 1424.2295 | 1425.4094 | 1427.3815 |
| Frequencies -- | 1429.4215 | 1431.8138 | 1437.7990 |
| Frequencies -- | 1444.2174 | 1448.0829 | 1449.2230 |
| Frequencies -- | 1455.0885 | 1455.5819 | 1456.4644 |
| Frequencies -- | 1464.4832 | 1470.6158 | 1473.0022 |
| Frequencies -- | 1476.3472 | 1481.8857 | 1490.1218 |
| Frequencies -- | 1490.2978 | 1491.3204 | 1494.0218 |
| Frequencies -- | 1496.3330 | 1498.1224 | 1502.0062 |
| Frequencies -- | 1502.2101 | 1505.8775 | 1507.1802 |
| Frequencies -- | 1508.4978 | 1514.5645 | 1518.6732 |
| Frequencies -- | 1574.1362 | 1585.6438 | 1586.8855 |
| Frequencies -- | 1596.8891 | 1597.7363 | 1605.1511 |
| Frequencies -- | 1614.0235 | 1619.6656 | 1622.4923 |
| Frequencies -- | 1628.1486 | 3010.2081 | 3010.9831 |
| Frequencies -- | 3011.3424 | 3014.6477 | 3016.6613 |
| Frequencies -- | 3020.1694 | 3032.4329 | 3062.0682 |
| Frequencies -- | 3102.0791 | 3103.8102 | 3105.0028 |
| Frequencies -- | 3112.8078 | 3115.9570 | 3116.8197 |
| Frequencies -- | 3117.0080 | 3143.9790 | 3146.4237 |
| Frequencies -- | 3147.8868 | 3150.4058 | 3153.8973 |
| Frequencies -- | 3156.3603 | 3159.8935 | 3164.8876 |
| Frequencies -- | 3167.1319 | 3170.0878 | 3172.7205 |
| Frequencies -- | 3177.5659 | 3187.3960 | 3192.4751 |
| Frequencies -- | 3194.8197 | 3206.2695 | 3223.1213 |



**proximal conformation**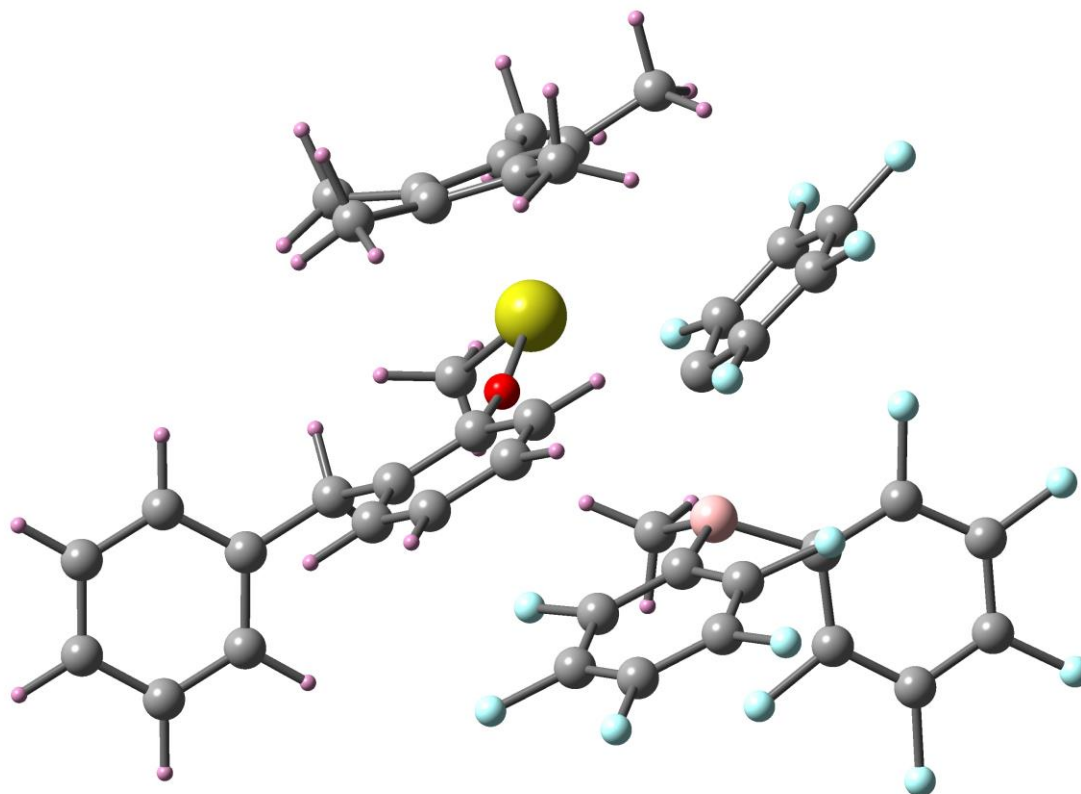

| <b>vacuum</b> | <b>toluene-like solvent</b> | <b>D3 dispersion</b> |
|---------------|-----------------------------|----------------------|
| -3312.5802657 | -3312.5909977               | -0.65550947          |

Imaginary frequency corresponding to vibration along the reaction coordinate:  $-230 \text{ cm}^{-1}$ .

|    |             |             |             |
|----|-------------|-------------|-------------|
| Ti | -1.10435600 | 1.97032700  | -0.38416000 |
| C  | -1.57992400 | 1.45529300  | -2.33200600 |
| H  | -1.28403800 | 0.39609300  | -2.34142100 |
| H  | -2.63136800 | 1.52735100  | -2.63104800 |
| H  | -0.95397600 | 2.03495100  | -3.02857600 |
| O  | -1.96128200 | 0.65484900  | 0.44695600  |
| C  | -2.74737900 | -0.12464400 | 1.29616600  |
| C  | -2.35791300 | -0.22876600 | 2.65342400  |
| C  | -3.89322600 | -0.81209700 | 0.78915200  |
| C  | -3.11154400 | -1.01774800 | 3.54188400  |
| C  | -4.62882600 | -1.59191400 | 1.71223400  |
| C  | -4.25375300 | -1.69820200 | 3.06872500  |
| H  | -2.80127800 | -1.10674500 | 4.58472500  |
| H  | -5.50451900 | -2.13503600 | 1.35967300  |
| C  | -0.63101500 | 4.34649700  | 0.34982900  |
| C  | -1.05823000 | 4.42452200  | -1.02497600 |
| C  | -1.69634200 | 3.74448400  | 1.12345100  |
| C  | -2.41447800 | 3.92942700  | -1.09881100 |
| C  | -2.81118500 | 3.51002700  | 0.23190400  |
| F  | 7.33727300  | -3.11827400 | -1.00227400 |
| C  | 6.06690000  | -2.56370100 | -0.95299700 |

|   |             |             |             |
|---|-------------|-------------|-------------|
| C | 5.87398500  | -1.24594000 | -0.51405000 |
| C | 4.94144500  | -3.30998100 | -1.33976900 |
| C | 4.57171800  | -0.70574700 | -0.47491200 |
| F | 6.96498200  | -0.48290600 | -0.11350600 |
| C | 3.66616200  | -2.71887500 | -1.28166500 |
| F | 5.09683300  | -4.62105900 | -1.77401500 |
| C | 3.40071700  | -1.39028100 | -0.85172000 |
| F | 4.50308700  | 0.60719600  | 0.00797800  |
| F | 2.60788700  | -3.55122300 | -1.68095800 |
| B | 1.80627900  | -0.90607600 | -0.98599900 |
| C | 1.46420200  | 1.13883900  | -0.23133400 |
| C | 2.15312900  | 2.10796200  | -1.01018000 |
| C | 1.68687100  | 1.31210100  | 1.16134100  |
| C | 3.05255100  | 3.06070100  | -0.50387300 |
| F | 1.95118400  | 2.15678300  | -2.40099800 |
| C | 2.58326900  | 2.23040500  | 1.73263900  |
| F | 0.94814900  | 0.54287200  | 2.07847500  |
| C | 3.28852100  | 3.10087900  | 0.88175100  |
| F | 3.68591100  | 3.98397700  | -1.33194600 |
| F | 2.75198000  | 2.33527200  | 3.11007700  |
| F | 4.15111800  | 4.04120800  | 1.41205300  |
| C | -4.27079600 | -0.70856200 | -0.69562300 |
| H | -4.38547800 | 0.35674700  | -0.94559500 |
| H | -3.41344100 | -1.06151700 | -1.28619500 |
| C | 0.88380800  | -1.85758500 | -0.02980100 |
| C | -0.32397300 | -2.45937700 | -0.45158300 |
| C | 1.32145600  | -2.31563200 | 1.23950500  |
| C | -1.02837800 | -3.42901200 | 0.28597800  |
| C | 0.64119700  | -3.26404600 | 2.02466100  |
| C | -0.54670800 | -3.83548100 | 1.53940300  |
| F | 2.50838200  | -1.82221200 | 1.79075400  |
| F | 1.13081500  | -3.64428800 | 3.26874800  |
| F | -1.23874400 | -4.77163000 | 2.29191000  |
| F | -2.20386500 | -3.98462800 | -0.21336000 |
| F | -0.90428500 | -2.11673700 | -1.68128300 |
| C | 1.49464400  | -0.77835300 | -2.56238500 |
| H | 0.54597900  | -0.30443100 | -2.81562400 |
| H | 2.29468700  | -0.22575500 | -3.07351500 |
| H | 1.47235800  | -1.79045000 | -2.99697600 |
| C | 0.54764500  | 5.07887900  | 0.94715500  |
| H | 0.20566100  | 6.08588100  | 1.24643500  |
| H | 0.94165500  | 4.60331700  | 1.85230700  |
| H | 1.36965900  | 5.22688600  | 0.23938200  |
| C | -0.29521300 | 5.06683700  | -2.16129100 |
| H | -0.55420500 | 6.13817200  | -2.23212500 |
| H | 0.79165100  | 5.00463100  | -2.02767900 |
| H | -0.53563100 | 4.61349900  | -3.13213200 |
| C | -1.71230900 | 3.61749500  | 2.63061500  |
| H | -2.47683800 | 2.91438700  | 2.98092100  |
| H | -0.74478600 | 3.29005100  | 3.03740900  |
| H | -1.93687400 | 4.59820800  | 3.08576400  |
| C | -3.33639100 | 4.09082900  | -2.28371900 |
| H | -3.77455300 | 5.10428000  | -2.26839400 |
| H | -2.81491500 | 3.97800900  | -3.24254700 |
| H | -4.17053800 | 3.37753200  | -2.26948200 |
| C | -4.21130100 | 3.13153700  | 0.65575700  |
| H | -4.22469900 | 2.43509300  | 1.50233400  |

|   |             |             |             |
|---|-------------|-------------|-------------|
| H | -4.75489500 | 4.03942200  | 0.97107800  |
| H | -4.78837000 | 2.67890000  | -0.16021400 |
| H | -4.84342500 | -2.31897400 | 3.74585900  |
| H | -1.46047600 | 0.28524500  | 2.99068100  |
| C | -5.52502500 | -1.45842200 | -1.13980600 |
| C | -5.44117800 | -2.78738300 | -1.62759500 |
| C | -6.79944400 | -0.83762000 | -1.10164400 |
| C | -6.59522100 | -3.47503000 | -2.06212500 |
| H | -4.47085300 | -3.28607200 | -1.66736000 |
| C | -7.95702600 | -1.52065700 | -1.53416600 |
| H | -6.89000100 | 0.18725400  | -0.73066700 |
| C | -7.85842700 | -2.84459800 | -2.01700600 |
| H | -6.50637200 | -4.49750100 | -2.43676100 |
| H | -8.92850700 | -1.02156200 | -1.49843500 |
| H | -8.75137800 | -3.37498400 | -2.35607200 |

|                |           |          |          |
|----------------|-----------|----------|----------|
| Frequencies -- | -229.9878 | 8.6224   | 14.9939  |
| Frequencies -- | 17.0644   | 21.1321  | 26.9107  |
| Frequencies -- | 28.2965   | 32.5350  | 35.0262  |
| Frequencies -- | 38.1742   | 41.7645  | 43.4047  |
| Frequencies -- | 49.0041   | 54.0732  | 56.5440  |
| Frequencies -- | 60.0518   | 63.0385  | 67.8083  |
| Frequencies -- | 81.5257   | 88.6443  | 92.8512  |
| Frequencies -- | 101.7267  | 104.6741 | 109.5134 |
| Frequencies -- | 115.2086  | 120.3324 | 124.2202 |
| Frequencies -- | 127.6050  | 132.2913 | 135.3770 |
| Frequencies -- | 142.8621  | 147.7582 | 150.2686 |
| Frequencies -- | 156.0771  | 157.7210 | 158.1061 |
| Frequencies -- | 164.9302  | 167.1488 | 177.1462 |
| Frequencies -- | 179.2465  | 182.9498 | 191.0132 |
| Frequencies -- | 192.1999  | 201.0162 | 202.8189 |
| Frequencies -- | 209.7059  | 219.4091 | 221.2883 |
| Frequencies -- | 226.5728  | 237.0792 | 242.3127 |
| Frequencies -- | 261.5905  | 262.5523 | 264.2085 |
| Frequencies -- | 265.6962  | 266.6758 | 271.5648 |
| Frequencies -- | 271.8704  | 275.8300 | 278.2012 |
| Frequencies -- | 281.1122  | 288.2860 | 291.7060 |
| Frequencies -- | 296.0142  | 300.3687 | 301.8634 |
| Frequencies -- | 303.2746  | 306.5761 | 314.2794 |
| Frequencies -- | 317.5804  | 326.6882 | 327.9988 |
| Frequencies -- | 330.5093  | 331.7633 | 333.6926 |
| Frequencies -- | 370.7436  | 374.5549 | 377.4869 |
| Frequencies -- | 381.6662  | 384.3549 | 402.2523 |
| Frequencies -- | 405.5531  | 410.3532 | 421.7599 |
| Frequencies -- | 424.2317  | 431.3339 | 434.2019 |
| Frequencies -- | 441.2535  | 447.6402 | 450.2687 |
| Frequencies -- | 454.7480  | 468.0404 | 485.2711 |
| Frequencies -- | 486.1284  | 508.5919 | 527.6759 |
| Frequencies -- | 535.7938  | 539.3034 | 542.0781 |
| Frequencies -- | 542.9972  | 551.3633 | 551.7145 |
| Frequencies -- | 569.8520  | 570.8442 | 583.3720 |
| Frequencies -- | 591.1348  | 591.6062 | 606.9951 |
| Frequencies -- | 617.0011  | 622.0172 | 623.9708 |
| Frequencies -- | 628.8020  | 637.5329 | 641.4896 |
| Frequencies -- | 643.7935  | 649.1861 | 653.0518 |
| Frequencies -- | 671.3809  | 690.2886 | 698.0011 |
| Frequencies -- | 706.9666  | 710.9521 | 714.9131 |
| Frequencies -- | 716.9861  | 719.6242 | 737.8227 |
| Frequencies -- | 746.2658  | 749.5020 | 770.8778 |
| Frequencies -- | 782.1864  | 800.6087 | 804.8097 |
| Frequencies -- | 806.7269  | 828.8724 | 832.4555 |

|                |           |           |           |
|----------------|-----------|-----------|-----------|
| Frequencies -- | 863.7091  | 871.8009  | 888.1749  |
| Frequencies -- | 895.7614  | 907.1696  | 914.8043  |
| Frequencies -- | 932.1391  | 934.7818  | 938.5613  |
| Frequencies -- | 965.1946  | 970.2323  | 970.4385  |
| Frequencies -- | 984.5887  | 988.3700  | 990.7186  |
| Frequencies -- | 997.5270  | 1000.2518 | 1006.9393 |
| Frequencies -- | 1022.0933 | 1033.2508 | 1036.3472 |
| Frequencies -- | 1041.9303 | 1042.0797 | 1046.0855 |
| Frequencies -- | 1047.3644 | 1048.4039 | 1053.1147 |
| Frequencies -- | 1053.9404 | 1056.5498 | 1059.5715 |
| Frequencies -- | 1086.0415 | 1087.1996 | 1088.4159 |
| Frequencies -- | 1094.0018 | 1105.8475 | 1124.9285 |
| Frequencies -- | 1171.3656 | 1173.0939 | 1175.6356 |
| Frequencies -- | 1180.6178 | 1182.1877 | 1188.7167 |
| Frequencies -- | 1191.8367 | 1203.6728 | 1209.4675 |
| Frequencies -- | 1214.2719 | 1215.2715 | 1221.8831 |
| Frequencies -- | 1237.4752 | 1244.4947 | 1287.9009 |
| Frequencies -- | 1310.9828 | 1320.5909 | 1327.4023 |
| Frequencies -- | 1336.0102 | 1342.8217 | 1351.6476 |
| Frequencies -- | 1357.3340 | 1367.4789 | 1374.8153 |
| Frequencies -- | 1378.6983 | 1379.8977 | 1411.5510 |
| Frequencies -- | 1413.5140 | 1414.5454 | 1422.3656 |
| Frequencies -- | 1423.4359 | 1426.3639 | 1428.6243 |
| Frequencies -- | 1431.1406 | 1431.2172 | 1434.6884 |
| Frequencies -- | 1445.3768 | 1446.6663 | 1448.0289 |
| Frequencies -- | 1450.0194 | 1455.1034 | 1457.5929 |
| Frequencies -- | 1463.5366 | 1471.5491 | 1473.5155 |
| Frequencies -- | 1478.0257 | 1483.4672 | 1491.3806 |
| Frequencies -- | 1491.9548 | 1493.1339 | 1495.9427 |
| Frequencies -- | 1499.6278 | 1500.3625 | 1501.7164 |
| Frequencies -- | 1502.4155 | 1506.8944 | 1508.2517 |
| Frequencies -- | 1511.5390 | 1515.6185 | 1518.4505 |
| Frequencies -- | 1573.9349 | 1584.8655 | 1585.4860 |
| Frequencies -- | 1596.9452 | 1597.9979 | 1604.0492 |
| Frequencies -- | 1614.0660 | 1620.7671 | 1622.7071 |
| Frequencies -- | 1627.5016 | 3008.8130 | 3009.1557 |
| Frequencies -- | 3011.4281 | 3012.3323 | 3013.0091 |
| Frequencies -- | 3014.2221 | 3037.2909 | 3049.5510 |
| Frequencies -- | 3096.9628 | 3103.8060 | 3104.4618 |
| Frequencies -- | 3105.5422 | 3112.0061 | 3113.1814 |
| Frequencies -- | 3121.1064 | 3138.8742 | 3143.4069 |
| Frequencies -- | 3146.7914 | 3150.2422 | 3152.7530 |
| Frequencies -- | 3156.7769 | 3159.1670 | 3164.6339 |
| Frequencies -- | 3168.7146 | 3169.8873 | 3171.8450 |
| Frequencies -- | 3181.5674 | 3187.7495 | 3194.1676 |
| Frequencies -- | 3206.6456 | 3207.2903 | 3228.9285 |

**Catalyst 16:**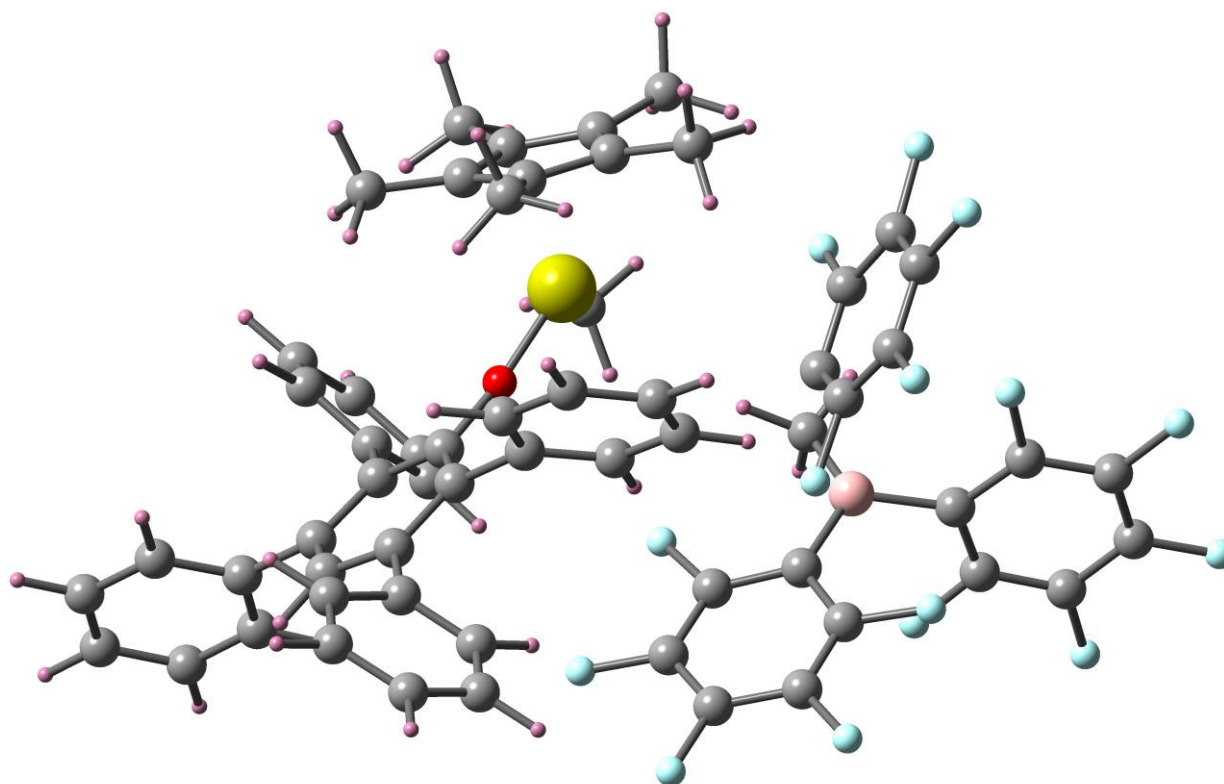

| vacuum        | toluene-like solvent | D3 dispersion |
|---------------|----------------------|---------------|
| -3966.1030953 | -3966.119655         | -0.84422840   |

Imaginary frequency corresponding to vibration along the reaction coordinate:  $-98 \text{ cm}^{-1}$ .

|    |             |             |             |
|----|-------------|-------------|-------------|
| Ti | -1.15116100 | 2.24154600  | -1.08666000 |
| C  | -0.18934700 | 1.31126600  | -2.63897100 |
| H  | 0.11882500  | 0.37176400  | -2.14487600 |
| H  | -0.84596400 | 1.06742600  | -3.48427500 |
| H  | 0.69844000  | 1.85365900  | -2.98805700 |
| O  | -2.25478100 | 0.97133200  | -0.48868500 |
| C  | -3.24029200 | 0.09848700  | -0.02482000 |
| C  | -3.52837000 | 0.07585700  | 1.37884800  |
| C  | -3.94116700 | -0.70321300 | -0.98056000 |
| C  | -4.58524800 | -0.77694900 | 1.82536300  |
| C  | -5.02616400 | -1.50085100 | -0.51202900 |
| C  | -5.32634400 | -1.50730200 | 0.86857000  |
| C  | -0.68087700 | 4.57742000  | -0.69273100 |
| C  | -0.40804200 | 4.40562300  | -2.10507000 |
| C  | -2.08633600 | 4.30193400  | -0.46720100 |
| C  | -1.62271400 | 3.95823800  | -2.74091100 |
| C  | -2.66659700 | 3.88847300  | -1.72480300 |
| F  | 9.55233300  | -2.27214600 | -0.19462000 |
| C  | 8.19732600  | -2.02628100 | -0.36493900 |
| C  | 7.64733600  | -0.78535400 | 0.00093600  |
| C  | 7.35820100  | -3.01478900 | -0.90965200 |
| C  | 6.26883100  | -0.54979300 | -0.18224500 |
| F  | 8.46650500  | 0.19724400  | 0.54209300  |

|   |             |             |             |
|---|-------------|-------------|-------------|
| C | 5.99022500  | -2.73124500 | -1.06889800 |
| F | 7.88289800  | -4.24655100 | -1.28155500 |
| C | 5.38361300  | -1.50562300 | -0.71570600 |
| F | 5.79837900  | 0.70215600  | 0.21464800  |
| F | 5.18755400  | -3.74605500 | -1.61994200 |
| B | 3.81021800  | -1.34961600 | -1.07705900 |
| C | 2.74772500  | 1.13965200  | 0.03335400  |
| C | 3.28835000  | 2.27198200  | -0.57257900 |
| C | 2.66910400  | 1.20851700  | 1.42095600  |
| C | 3.76703700  | 3.39646800  | 0.12504900  |
| F | 3.37470700  | 2.34992900  | -1.99970300 |
| C | 3.13213800  | 2.28733100  | 2.19835900  |
| F | 2.05720700  | 0.13670500  | 2.15098200  |
| C | 3.69552000  | 3.39378800  | 1.53215700  |
| F | 4.27128900  | 4.53467200  | -0.52963000 |
| F | 3.02730400  | 2.31357500  | 3.59908500  |
| F | 4.13672700  | 4.49929000  | 2.25812300  |
| C | 2.77929300  | -2.18906800 | -0.19216800 |
| C | 1.52997300  | -2.65129200 | -0.67631000 |
| C | 3.05781800  | -2.59529000 | 1.14047900  |
| C | 0.63068100  | -3.42499000 | 0.07855400  |
| C | 2.18461900  | -3.36136800 | 1.93335100  |
| C | 0.95527100  | -3.78127300 | 1.39815000  |
| F | 4.23926300  | -2.19912700 | 1.76112800  |
| F | 2.51667900  | -3.69802100 | 3.23781300  |
| F | 0.07304100  | -4.53199300 | 2.15947400  |
| F | -0.58336000 | -3.83676300 | -0.47077700 |
| F | 1.10755100  | -2.35065600 | -1.97662800 |
| C | 3.55174400  | -0.88628800 | -2.56818900 |
| H | 2.54716700  | -0.50113800 | -2.75754800 |
| H | 4.28136300  | -0.12553200 | -2.87695500 |
| H | 3.70217900  | -1.76800300 | -3.22229100 |
| C | 0.28168100  | 5.09241000  | 0.35628000  |
| H | -0.03135600 | 6.09641000  | 0.68821600  |
| H | 0.31777700  | 4.45902400  | 1.25648300  |
| H | 1.30290100  | 5.17891300  | -0.02806300 |
| C | 0.88458000  | 4.73886200  | -2.80964100 |
| H | 0.86636900  | 5.79996300  | -3.11497900 |
| H | 1.76759900  | 4.59787600  | -2.17827500 |
| H | 1.03176100  | 4.14299500  | -3.71886800 |
| C | -2.84258900 | 4.56728500  | 0.81180200  |
| H | -3.60920600 | 3.81185300  | 1.01916000  |
| H | -2.18157900 | 4.61294600  | 1.68480600  |
| H | -3.35361700 | 5.54312600  | 0.73302400  |
| C | -1.83175500 | 3.77897800  | -4.22497400 |
| H | -2.11472300 | 4.74581500  | -4.67708600 |
| H | -0.92330400 | 3.43514900  | -4.73516700 |
| H | -2.63380100 | 3.06427500  | -4.44993200 |
| C | -4.13788600 | 3.65411100  | -1.97839400 |
| H | -4.64922300 | 3.24583400  | -1.09622700 |
| H | -4.62753600 | 4.61137700  | -2.22884900 |
| H | -4.31214400 | 2.96769600  | -2.81553200 |
| H | -6.12139700 | -2.16332800 | 1.22009500  |
| C | -4.93174900 | -0.99631800 | 3.27417600  |
| C | -3.97493600 | -1.49870700 | 4.19430100  |
| C | -6.25882500 | -0.78613500 | 3.73244400  |
| C | -4.33209400 | -1.77365300 | 5.53040700  |

|   |             |             |             |
|---|-------------|-------------|-------------|
| H | -2.95339600 | -1.69017500 | 3.86384200  |
| C | -6.61672600 | -1.05230100 | 5.07108300  |
| H | -7.01311900 | -0.40245000 | 3.04157600  |
| C | -5.65316500 | -1.54773500 | 5.97673400  |
| H | -3.58059800 | -2.16774300 | 6.21830500  |
| H | -7.64235400 | -0.87515600 | 5.40359500  |
| H | -5.92797200 | -1.75944900 | 7.01259500  |
| C | -5.86487100 | -2.37475300 | -1.40884400 |
| C | -7.24844500 | -2.10053400 | -1.56570000 |
| C | -5.32865500 | -3.52134900 | -2.04874100 |
| C | -8.07024900 | -2.93609500 | -2.35201100 |
| H | -7.68214800 | -1.22542100 | -1.07603500 |
| C | -6.14952500 | -4.36244800 | -2.82886400 |
| H | -4.27343400 | -3.76695900 | -1.92557900 |
| C | -7.52255600 | -4.07176600 | -2.98794800 |
| H | -9.13162600 | -2.70228600 | -2.46478600 |
| H | -5.71722600 | -5.24462600 | -3.30677900 |
| H | -8.15659300 | -4.72325800 | -3.59377700 |
| C | -2.77419300 | 0.93511000  | 2.35506700  |
| C | -1.36891700 | 0.81716000  | 2.52803200  |
| C | -3.47728300 | 1.84519100  | 3.18867900  |
| C | -0.69456700 | 1.56915700  | 3.51577800  |
| H | -0.80084500 | 0.09968200  | 1.93337600  |
| C | -2.80594900 | 2.60385100  | 4.16837000  |
| H | -4.55795300 | 1.94606200  | 3.08160300  |
| C | -1.41089200 | 2.46556300  | 4.33893800  |
| H | 0.37595300  | 1.43106400  | 3.65688000  |
| H | -3.37230600 | 3.28830400  | 4.80438600  |
| H | -0.88845600 | 3.03515700  | 5.11074300  |
| C | -3.55565300 | -0.73428900 | -2.43601500 |
| C | -4.34955200 | -0.10123800 | -3.42508700 |
| C | -2.43402800 | -1.49460000 | -2.85234800 |
| C | -4.02862600 | -0.22032600 | -4.79434600 |
| H | -5.23609400 | 0.46137100  | -3.12579600 |
| C | -2.11367300 | -1.62129500 | -4.22008100 |
| H | -1.83140400 | -2.00911400 | -2.10444300 |
| C | -2.90931900 | -0.98254600 | -5.19698300 |
| H | -4.66097000 | 0.26254600  | -5.54346300 |
| H | -1.25003900 | -2.21977400 | -4.51779100 |
| H | -2.66730100 | -1.08672500 | -6.25712800 |

|                |          |          |          |
|----------------|----------|----------|----------|
| Frequencies -- | -98.4603 | -4.4148  | 8.2376   |
| Frequencies -- | 9.4647   | 12.2855  | 12.8777  |
| Frequencies -- | 14.9423  | 18.1594  | 21.1269  |
| Frequencies -- | 23.0995  | 26.5498  | 30.1075  |
| Frequencies -- | 32.1406  | 34.4240  | 35.8813  |
| Frequencies -- | 39.2834  | 42.7842  | 43.6901  |
| Frequencies -- | 46.6497  | 48.6664  | 51.3021  |
| Frequencies -- | 56.4056  | 59.2476  | 63.6744  |
| Frequencies -- | 64.3058  | 70.0721  | 72.0806  |
| Frequencies -- | 78.2608  | 89.2355  | 91.9161  |
| Frequencies -- | 102.0285 | 104.7286 | 108.0534 |
| Frequencies -- | 113.1177 | 115.3677 | 116.5933 |
| Frequencies -- | 118.5804 | 120.1037 | 123.3352 |
| Frequencies -- | 125.2845 | 134.1518 | 137.7029 |
| Frequencies -- | 140.4782 | 141.5951 | 143.6079 |
| Frequencies -- | 144.0119 | 152.0077 | 153.7817 |
| Frequencies -- | 155.6925 | 160.1008 | 163.3110 |

|                |           |           |           |
|----------------|-----------|-----------|-----------|
| Frequencies -- | 176.4441  | 178.5217  | 183.1290  |
| Frequencies -- | 194.2547  | 195.0802  | 198.0378  |
| Frequencies -- | 209.4842  | 210.4730  | 211.2212  |
| Frequencies -- | 213.1915  | 218.8621  | 228.7080  |
| Frequencies -- | 248.9618  | 253.4460  | 254.9270  |
| Frequencies -- | 257.6090  | 259.2595  | 263.9319  |
| Frequencies -- | 264.9090  | 265.7499  | 268.6352  |
| Frequencies -- | 276.9276  | 277.6805  | 284.8811  |
| Frequencies -- | 288.3463  | 289.4393  | 290.7207  |
| Frequencies -- | 293.9201  | 297.7286  | 302.1484  |
| Frequencies -- | 304.5392  | 308.6138  | 316.9506  |
| Frequencies -- | 321.9576  | 327.1432  | 333.7189  |
| Frequencies -- | 334.1542  | 348.3695  | 373.6326  |
| Frequencies -- | 378.9846  | 379.2211  | 389.7144  |
| Frequencies -- | 395.1618  | 402.6952  | 404.4017  |
| Frequencies -- | 405.5648  | 405.9342  | 408.1638  |
| Frequencies -- | 412.8672  | 415.8530  | 419.7589  |
| Frequencies -- | 420.7107  | 425.0434  | 430.4156  |
| Frequencies -- | 431.1331  | 446.1378  | 448.0680  |
| Frequencies -- | 453.1619  | 482.3874  | 486.6150  |
| Frequencies -- | 507.3012  | 517.3958  | 527.5267  |
| Frequencies -- | 527.8317  | 531.7442  | 536.3873  |
| Frequencies -- | 539.3266  | 542.0346  | 545.5108  |
| Frequencies -- | 549.4024  | 550.2320  | 551.8716  |
| Frequencies -- | 556.3882  | 581.1967  | 587.6037  |
| Frequencies -- | 598.1179  | 608.5721  | 613.3075  |
| Frequencies -- | 615.9357  | 617.1842  | 619.7662  |
| Frequencies -- | 623.9362  | 628.2743  | 629.3660  |
| Frequencies -- | 630.9720  | 633.3974  | 637.0235  |
| Frequencies -- | 639.2161  | 640.1911  | 647.2422  |
| Frequencies -- | 656.4172  | 665.8695  | 672.2665  |
| Frequencies -- | 689.9520  | 695.1570  | 697.8513  |
| Frequencies -- | 709.4809  | 709.5265  | 716.3959  |
| Frequencies -- | 716.6640  | 720.8694  | 722.2885  |
| Frequencies -- | 746.0039  | 746.3240  | 748.1157  |
| Frequencies -- | 765.1297  | 765.7421  | 774.2689  |
| Frequencies -- | 784.2017  | 791.6664  | 795.9412  |
| Frequencies -- | 800.1972  | 805.1456  | 806.1231  |
| Frequencies -- | 844.2453  | 858.2654  | 858.9943  |
| Frequencies -- | 859.9504  | 861.7676  | 871.7507  |
| Frequencies -- | 876.5682  | 879.4107  | 908.6820  |
| Frequencies -- | 914.4378  | 915.2567  | 933.7980  |
| Frequencies -- | 937.1219  | 938.3844  | 944.1655  |
| Frequencies -- | 948.0445  | 961.8785  | 965.4843  |
| Frequencies -- | 976.0229  | 978.2340  | 984.4520  |
| Frequencies -- | 987.8015  | 994.6012  | 995.9249  |
| Frequencies -- | 999.0812  | 1000.8112 | 1004.8789 |
| Frequencies -- | 1007.0976 | 1010.2135 | 1013.2315 |
| Frequencies -- | 1014.1427 | 1019.7958 | 1022.3105 |
| Frequencies -- | 1026.8693 | 1040.0119 | 1040.2408 |
| Frequencies -- | 1044.4195 | 1045.2786 | 1045.8035 |
| Frequencies -- | 1047.5396 | 1049.9310 | 1050.2949 |
| Frequencies -- | 1052.7983 | 1053.6683 | 1058.4504 |
| Frequencies -- | 1062.5990 | 1089.3505 | 1089.6704 |
| Frequencies -- | 1090.1398 | 1090.8007 | 1092.0190 |
| Frequencies -- | 1092.1485 | 1100.4036 | 1125.2263 |
| Frequencies -- | 1126.9246 | 1129.1389 | 1130.0692 |
| Frequencies -- | 1136.2934 | 1171.4802 | 1175.0102 |
| Frequencies -- | 1183.2997 | 1184.0235 | 1184.1572 |
| Frequencies -- | 1187.6654 | 1192.2199 | 1204.6657 |
| Frequencies -- | 1206.4781 | 1207.0897 | 1208.0140 |
| Frequencies -- | 1217.9137 | 1228.0867 | 1232.2073 |
| Frequencies -- | 1243.8641 | 1257.4965 | 1281.5118 |



|                |           |           |           |
|----------------|-----------|-----------|-----------|
| Frequencies -- | 1305.2874 | 1318.3889 | 1328.3780 |
| Frequencies -- | 1332.1007 | 1332.2685 | 1333.9162 |
| Frequencies -- | 1335.4025 | 1338.5475 | 1346.1533 |
| Frequencies -- | 1357.7042 | 1362.8679 | 1363.6637 |
| Frequencies -- | 1366.8430 | 1368.4456 | 1369.8359 |
| Frequencies -- | 1371.0758 | 1378.6532 | 1385.2533 |
| Frequencies -- | 1408.7677 | 1411.0283 | 1414.7711 |
| Frequencies -- | 1419.8776 | 1421.3283 | 1425.6604 |
| Frequencies -- | 1426.2750 | 1429.3232 | 1429.9068 |
| Frequencies -- | 1430.1397 | 1432.0139 | 1436.1221 |
| Frequencies -- | 1441.5058 | 1443.3502 | 1445.3086 |
| Frequencies -- | 1447.4973 | 1448.2315 | 1449.6956 |
| Frequencies -- | 1456.8582 | 1459.3221 | 1460.3831 |
| Frequencies -- | 1471.0138 | 1472.9849 | 1480.1447 |
| Frequencies -- | 1489.4586 | 1490.7546 | 1494.0719 |
| Frequencies -- | 1495.5460 | 1497.0806 | 1497.2458 |
| Frequencies -- | 1498.8554 | 1502.1624 | 1502.8294 |
| Frequencies -- | 1506.6959 | 1508.9614 | 1509.8735 |
| Frequencies -- | 1512.5361 | 1519.3976 | 1526.9971 |
| Frequencies -- | 1575.8444 | 1586.9936 | 1588.1931 |
| Frequencies -- | 1593.5966 | 1594.7224 | 1596.1523 |
| Frequencies -- | 1597.0099 | 1598.3044 | 1598.5069 |
| Frequencies -- | 1619.1971 | 1619.3249 | 1623.2066 |
| Frequencies -- | 1623.6409 | 1624.1313 | 1624.3247 |
| Frequencies -- | 2992.2946 | 2997.5980 | 3011.6944 |
| Frequencies -- | 3012.0243 | 3013.1491 | 3016.6662 |
| Frequencies -- | 3017.5670 | 3091.9808 | 3106.3571 |
| Frequencies -- | 3108.1869 | 3110.1143 | 3116.4666 |
| Frequencies -- | 3118.6857 | 3126.0913 | 3148.3876 |
| Frequencies -- | 3151.5363 | 3152.6423 | 3153.0810 |
| Frequencies -- | 3154.2348 | 3157.9033 | 3160.0400 |
| Frequencies -- | 3161.7619 | 3163.6698 | 3166.3246 |
| Frequencies -- | 3166.4624 | 3168.2979 | 3172.2214 |
| Frequencies -- | 3173.5378 | 3176.8111 | 3177.4421 |
| Frequencies -- | 3178.3835 | 3180.7405 | 3185.6171 |
| Frequencies -- | 3185.9165 | 3189.3687 | 3191.6771 |
| Frequencies -- | 3192.6566 | 3194.7514 | 3197.9322 |
| Frequencies -- | 3198.1667 | 3209.1120 | 3227.8202 |

**Catalyst 17:****distal conformation**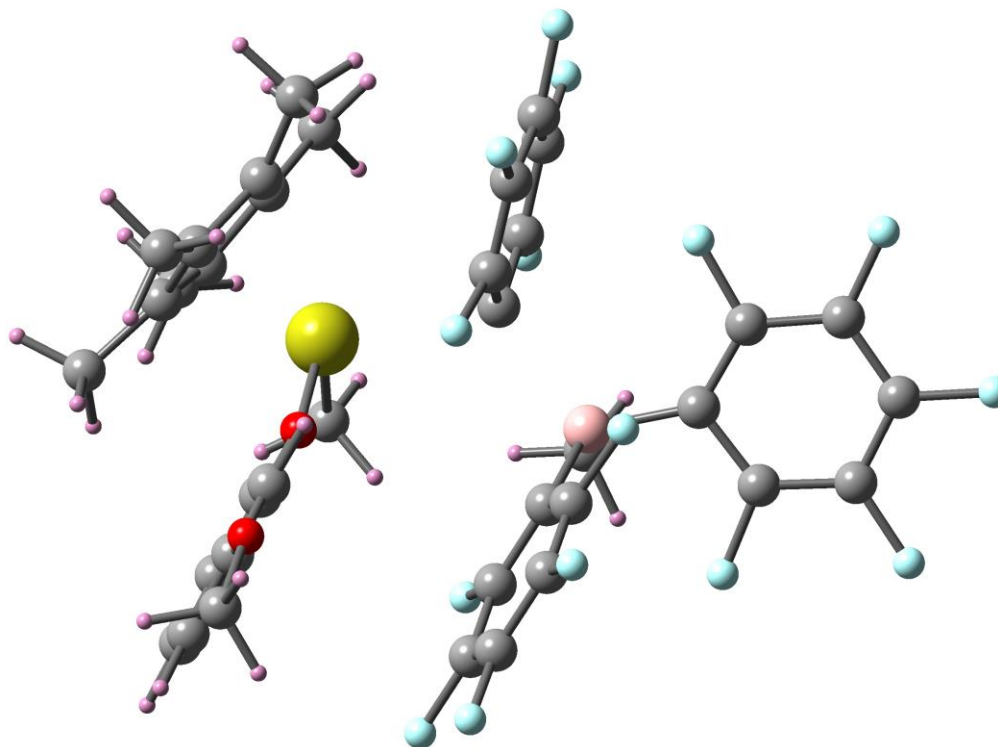

| <b>vacuum</b> | <b>toluene-like solvent</b> | <b>D3 dispersion</b> |
|---------------|-----------------------------|----------------------|
| -3156.8201207 | -3156.8305403               | -0.57958918          |

Imaginary frequency corresponding to vibration along the reaction coordinate:  $-226\text{ cm}^{-1}$ .

|    |             |             |             |
|----|-------------|-------------|-------------|
| Ti | 2.02048400  | -1.34657500 | -0.77354800 |
| C  | 1.94372600  | -1.14770500 | -2.83689700 |
| H  | 1.30772400  | -0.25981400 | -2.95772700 |
| H  | 2.89789400  | -0.96903200 | -3.34784000 |
| H  | 1.45445600  | -2.03355300 | -3.27341900 |
| O  | 2.44300000  | 0.33478800  | -0.41368200 |
| C  | 3.05011600  | 1.55163200  | -0.13345900 |
| C  | 2.95469300  | 2.09239500  | 1.16351300  |
| C  | 3.71796100  | 2.24601400  | -1.17460800 |
| C  | 3.53412700  | 3.35631600  | 1.43028300  |
| C  | 4.29104300  | 3.49716200  | -0.88745800 |
| C  | 4.20957400  | 4.06401500  | 0.40373000  |
| H  | 4.79553900  | 4.05009900  | -1.68228400 |
| C  | 2.81251900  | -3.23643100 | 0.65042800  |
| C  | 2.68808900  | -3.77569700 | -0.68520500 |
| C  | 3.79552100  | -2.17545900 | 0.61977700  |
| C  | 3.62027900  | -3.07320100 | -1.53559200 |
| C  | 4.29971100  | -2.07679100 | -0.73204900 |
| F  | -7.58366500 | 0.41044300  | 0.02225000  |
| C  | -6.21414300 | 0.31884500  | -0.17890400 |

|   |             |             |             |
|---|-------------|-------------|-------------|
| C | -5.45801400 | -0.67441600 | 0.45986200  |
| C | -5.55046100 | 1.22046400  | -1.02729700 |
| C | -4.06729600 | -0.74695100 | 0.23593800  |
| F | -6.08166000 | -1.57705800 | 1.31419400  |
| C | -4.16135500 | 1.09998000  | -1.21443800 |
| F | -6.26938400 | 2.22032100  | -1.67185100 |
| C | -3.33682200 | 0.11719100  | -0.60191100 |
| F | -3.41887800 | -1.76416100 | 0.94846900  |
| F | -3.59487900 | 2.05388900  | -2.07558200 |
| B | -1.73582300 | 0.12918800  | -1.08842400 |
| C | -0.52433900 | -1.36180000 | -0.03843100 |
| C | -0.92805200 | -2.69011700 | -0.34541400 |
| C | -0.38840000 | -1.15192000 | 1.36241900  |
| C | -1.26773900 | -3.67247200 | 0.59985300  |
| F | -1.00183600 | -3.10017500 | -1.68826200 |
| C | -0.73142000 | -2.08069600 | 2.35879300  |
| F | 0.16045900  | 0.05245700  | 1.82951900  |
| C | -1.19047500 | -3.35137800 | 1.96679500  |
| F | -1.65181800 | -4.95530000 | 0.21976100  |
| F | -0.57763400 | -1.79749700 | 3.71150400  |
| F | -1.50059100 | -4.30194900 | 2.92092700  |
| C | -1.07654400 | 1.57142900  | -0.68482100 |
| C | -0.29976600 | 2.35918600  | -1.56592200 |
| C | -1.39373700 | 2.23818300  | 0.52652200  |
| C | 0.12074700  | 3.67532200  | -1.29571400 |
| C | -0.97996400 | 3.54217300  | 0.85298200  |
| C | -0.21616900 | 4.27280100  | -0.07167900 |
| F | -2.17442300 | 1.59768900  | 1.49469700  |
| F | -1.31992500 | 4.11599200  | 2.07267200  |
| F | 0.21403700  | 5.55818900  | 0.22821100  |
| F | 0.87430600  | 4.38521400  | -2.22492900 |
| F | 0.10279100  | 1.85663300  | -2.80993500 |
| C | -1.72392400 | -0.37674500 | -2.62082600 |
| H | -0.74005600 | -0.60206400 | -3.03285200 |
| H | -2.35315100 | -1.26922100 | -2.74129700 |
| H | -2.16166700 | 0.41442900  | -3.25002700 |
| C | 2.27217000  | -3.84893900 | 1.92197100  |
| H | 3.05968100  | -4.48261200 | 2.36653200  |
| H | 2.00437800  | -3.10387300 | 2.68187700  |
| H | 1.40734900  | -4.49754700 | 1.75121200  |
| C | 1.89183900  | -4.99026400 | -1.10938200 |
| H | 2.57548400  | -5.83719200 | -1.29226700 |
| H | 1.17544700  | -5.31244900 | -0.34614700 |
| H | 1.33108000  | -4.82516900 | -2.04050900 |
| C | 4.33134300  | -1.45597200 | 1.83604400  |
| H | 4.82609500  | -0.51178000 | 1.58103000  |
| H | 3.54681700  | -1.22994800 | 2.57193000  |
| H | 5.07747300  | -2.09178900 | 2.34449600  |
| C | 4.00190400  | -3.50135100 | -2.93163000 |
| H | 4.71423900  | -4.34306300 | -2.87116600 |
| H | 3.13937500  | -3.84835500 | -3.51614000 |
| H | 4.49398000  | -2.70161700 | -3.49913100 |
| C | 5.45558500  | -1.22013700 | -1.19385000 |
| H | 5.59344600  | -0.33003900 | -0.56923200 |
| H | 6.39197000  | -1.80325600 | -1.14615700 |
| H | 5.33715500  | -0.88268700 | -2.23267000 |
| H | 4.65336900  | 5.04016900  | 0.58800800  |

|                |            |            |             |
|----------------|------------|------------|-------------|
| H              | 2.41744200 | 1.57279000 | 1.95276200  |
| H              | 3.75745100 | 1.82327200 | -2.17677900 |
| O              | 3.37039600 | 3.80286100 | 2.74462200  |
| C              | 3.80469500 | 5.16025500 | 3.09461100  |
| H              | 3.28769700 | 5.91497900 | 2.47921100  |
| H              | 3.51904200 | 5.28226600 | 4.14616600  |
| H              | 4.89735500 | 5.27287800 | 2.99205900  |
|                |            |            |             |
| Frequencies -- | -225.5713  | 6.2327     | 13.8412     |
| Frequencies -- | 15.2591    | 21.5948    | 27.6943     |
| Frequencies -- | 33.0047    | 35.2620    | 39.6945     |
| Frequencies -- | 44.3191    | 47.9183    | 53.0282     |
| Frequencies -- | 56.9113    | 59.6970    | 63.6077     |
| Frequencies -- | 78.3379    | 85.4485    | 91.5481     |
| Frequencies -- | 94.2868    | 100.8347   | 106.7288    |
| Frequencies -- | 110.1086   | 111.9365   | 115.8408    |
| Frequencies -- | 119.1890   | 120.7059   | 127.7404    |
| Frequencies -- | 128.3574   | 135.7710   | 143.1653    |
| Frequencies -- | 144.2574   | 145.6389   | 150.0887    |
| Frequencies -- | 157.2287   | 159.3870   | 164.9409    |
| Frequencies -- | 166.6816   | 173.5486   | 185.3837    |
| Frequencies -- | 194.9972   | 198.0264   | 198.3859    |
| Frequencies -- | 203.3923   | 211.5012   | 222.5747    |
| Frequencies -- | 235.2844   | 236.1566   | 241.9599    |
| Frequencies -- | 256.0225   | 258.3835   | 263.9043    |
| Frequencies -- | 265.9187   | 267.2200   | 267.5615    |
| Frequencies -- | 271.4071   | 275.1403   | 275.5877    |
| Frequencies -- | 277.6170   | 280.3908   | 285.8589    |
| Frequencies -- | 291.2094   | 294.6317   | 297.2418    |
| Frequencies -- | 301.2137   | 304.0669   | 306.2224    |
| Frequencies -- | 313.9978   | 316.5801   | 321.0892    |
| Frequencies -- | 324.9724   | 329.1359   | 333.5574    |
| Frequencies -- | 370.7879   | 374.0972   | 375.1854    |
| Frequencies -- | 381.7683   | 386.2623   | 399.8682    |
| Frequencies -- | 407.6323   | 413.2948   | 422.7745    |
| Frequencies -- | 425.0149   | 431.0001   | 434.0116    |
| Frequencies -- | 441.8108   | 450.5662   | 455.2737    |
| Frequencies -- | 457.2326   | 478.1789   | 485.3538    |
| Frequencies -- | 508.7971   | 529.8888   | 535.0226    |
| Frequencies -- | 539.7338   | 542.6186   | 551.1329    |
| Frequencies -- | 552.5095   | 558.6745   | 571.2000    |
| Frequencies -- | 585.1776   | 592.6416   | 594.1386    |
| Frequencies -- | 605.0755   | 605.8696   | 614.9389    |
| Frequencies -- | 628.8634   | 637.5828   | 642.3935    |
| Frequencies -- | 644.6430   | 650.0717   | 651.6842    |
| Frequencies -- | 673.2850   | 677.9468   | 692.3173    |
| Frequencies -- | 697.6215   | 714.5528   | 716.7979    |
| Frequencies -- | 719.5065   | 737.5731   | 749.8423    |
| Frequencies -- | 762.7815   | 781.4672   | 784.6324    |
| Frequencies -- | 798.7280   | 806.5339   | 830.4336    |
| Frequencies -- | 841.6899   | 870.5702   | 890.2663    |
| Frequencies -- | 897.5912   | 907.4998   | 917.3091    |
| Frequencies -- | 950.3898   | 963.7513   | 964.2100    |
| Frequencies -- | 969.8635   | 986.0097   | 988.5731    |
| Frequencies -- | 991.2077   | 996.0124   | 1024.9563   |
| Frequencies -- | 1036.3352  | 1038.2027  | 1040.5520   |
| Frequencies -- | 1040.8522  | 1044.6960  | 1048.2111   |
| Frequencies -- | 1048.7866  | 1057.3371  | 1058.9829   |
| Frequencies -- | 1084.8868  | 1085.8941  | 1086.7589   |
| Frequencies -- | 1098.3461  | 1123.0661  | 1127.2691   |
| Frequencies -- | 1163.7583  | 1172.2229  | 1173.1087   |
| Frequencies -- | 1174.9454  | 1176.0721  | 1189.4934   |

|                |           |           |           |
|----------------|-----------|-----------|-----------|
| Frequencies -- | 1200.9923 | 1213.4435 | 1221.8785 |
| Frequencies -- | 1246.3417 | 1268.7075 | 1303.3695 |
| Frequencies -- | 1310.1371 | 1326.6372 | 1334.4814 |
| Frequencies -- | 1342.0329 | 1356.6471 | 1370.0800 |
| Frequencies -- | 1379.5869 | 1384.9779 | 1410.8852 |
| Frequencies -- | 1413.4183 | 1413.6869 | 1422.6128 |
| Frequencies -- | 1423.5763 | 1425.8085 | 1428.6774 |
| Frequencies -- | 1431.8288 | 1433.6180 | 1438.0297 |
| Frequencies -- | 1445.4591 | 1447.9026 | 1450.4335 |
| Frequencies -- | 1453.9081 | 1456.1217 | 1457.4599 |
| Frequencies -- | 1463.0964 | 1470.1836 | 1472.8041 |
| Frequencies -- | 1481.9176 | 1483.6125 | 1485.4255 |
| Frequencies -- | 1488.6243 | 1490.7121 | 1491.8642 |
| Frequencies -- | 1492.5596 | 1496.6304 | 1499.3474 |
| Frequencies -- | 1503.1928 | 1504.5558 | 1505.4675 |
| Frequencies -- | 1508.6044 | 1514.4674 | 1519.3806 |
| Frequencies -- | 1573.9123 | 1585.6893 | 1588.8107 |
| Frequencies -- | 1596.7330 | 1598.2055 | 1618.1115 |
| Frequencies -- | 1619.5200 | 1622.1310 | 2996.9998 |
| Frequencies -- | 3008.3195 | 3009.4335 | 3010.4834 |
| Frequencies -- | 3011.7771 | 3014.2779 | 3015.4664 |
| Frequencies -- | 3037.1388 | 3097.7139 | 3097.7587 |
| Frequencies -- | 3100.0583 | 3100.4718 | 3102.9335 |
| Frequencies -- | 3108.3569 | 3120.5428 | 3138.5340 |
| Frequencies -- | 3145.7057 | 3149.7298 | 3156.0005 |
| Frequencies -- | 3158.4502 | 3159.8431 | 3161.3038 |
| Frequencies -- | 3169.7339 | 3176.5460 | 3206.4167 |
| Frequencies -- | 3214.1254 | 3221.8089 | 3236.9700 |

**proximal conformation**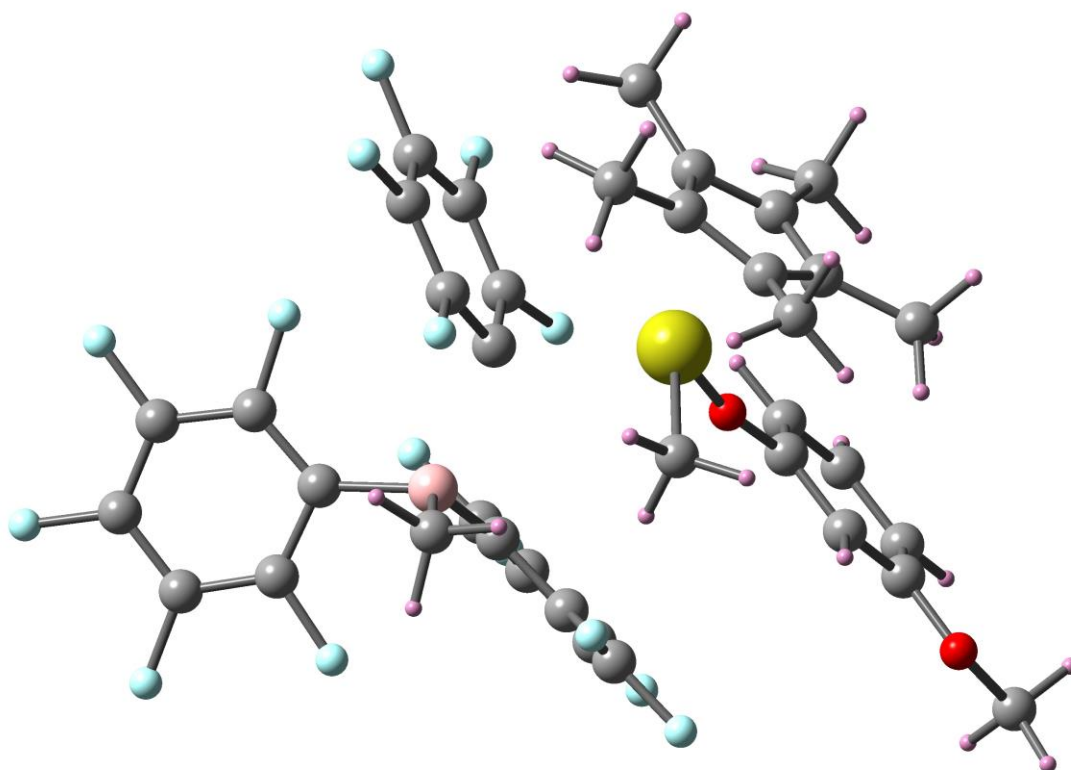

| <b>vacuum</b> | <b>toluene-like solvent</b> | <b>D3 dispersion</b> |
|---------------|-----------------------------|----------------------|
| -3156.820176  | -3156.8308366               | -0.57800022          |

Imaginary frequency corresponding to vibration along the reaction coordinate:  $-230\text{ cm}^{-1}$ .

|    |             |             |             |
|----|-------------|-------------|-------------|
| Ti | 1.82721000  | -1.53930400 | -0.63302400 |
| C  | 1.96405000  | -1.03478500 | -2.63777900 |
| H  | 1.46824500  | -0.05417000 | -2.65341600 |
| H  | 2.97022500  | -0.92612500 | -3.06057900 |
| H  | 1.39127500  | -1.76555800 | -3.23218800 |
| O  | 2.43982800  | -0.01104700 | 0.01754800  |
| C  | 3.16475900  | 1.05273700  | 0.53801600  |
| C  | 3.02604900  | 1.40061100  | 1.90599800  |
| C  | 3.99984300  | 1.79010200  | -0.32434400 |
| C  | 3.74488200  | 2.50843700  | 2.39032700  |
| C  | 4.71762900  | 2.89865900  | 0.18403900  |
| C  | 4.59222400  | 3.26309600  | 1.54872100  |
| H  | 3.63863400  | 2.79790600  | 3.43780500  |
| C  | 2.16669900  | -3.76050600 | 0.47777500  |
| C  | 2.16358400  | -4.02182100 | -0.94338800 |
| C  | 3.25986000  | -2.85974900 | 0.77041400  |
| C  | 3.28403900  | -3.32047900 | -1.52611300 |
| C  | 3.95754300  | -2.59266800 | -0.46860000 |
| F  | -7.52797000 | 1.41197300  | -0.38028900 |
| C  | -6.16615000 | 1.16660100  | -0.47844200 |
| C  | -5.59936000 | 0.01908900  | 0.09455200  |
| C  | -5.32072000 | 2.06331700  | -1.15256500 |

|   |             |             |             |
|---|-------------|-------------|-------------|
| C | -4.21217400 | -0.20751900 | -0.02080900 |
| F | -6.40603800 | -0.88399600 | 0.77815300  |
| C | -3.94420800 | 1.78521000  | -1.23844100 |
| F | -5.84955800 | 3.21373500  | -1.72613300 |
| C | -3.30671900 | 0.64108100  | -0.68604200 |
| F | -3.76001900 | -1.36984100 | 0.61724700  |
| F | -3.18600600 | 2.74884200  | -1.92277400 |
| B | -1.67562700 | 0.49901200  | -1.02926900 |
| C | -0.76547200 | -1.26058200 | -0.07959000 |
| C | -1.30737600 | -2.47760900 | -0.57444900 |
| C | -0.72582300 | -1.22901300 | 1.34221900  |
| C | -1.85359900 | -3.50227500 | 0.21639000  |
| F | -1.31321200 | -2.72079300 | -1.95924300 |
| C | -1.26767800 | -2.20929600 | 2.19031900  |
| F | -0.07971100 | -0.16622200 | 1.99336600  |
| C | -1.85468500 | -3.35063200 | 1.61415400  |
| F | -2.36371900 | -4.67019300 | -0.34499100 |
| F | -1.19595500 | -2.10313500 | 3.57560000  |
| F | -2.36810300 | -4.34908800 | 2.41996000  |
| C | -0.88681200 | 1.77668900  | -0.37969000 |
| C | 0.07788800  | 2.54737700  | -1.06989700 |
| C | -1.24319500 | 2.32827400  | 0.87789300  |
| C | 0.63946200  | 3.74283400  | -0.58231500 |
| C | -0.70022500 | 3.50870000  | 1.41602400  |
| C | 0.25043500  | 4.22915500  | 0.67490300  |
| F | -2.19616100 | 1.68968600  | 1.67865400  |
| F | -1.09148400 | 3.96865600  | 2.66866800  |
| F | 0.80958400  | 5.39230500  | 1.18491500  |
| F | 1.58255200  | 4.44132600  | -1.32913600 |
| F | 0.54254100  | 2.15126300  | -2.33007500 |
| C | -1.56884800 | 0.18319500  | -2.60823400 |
| H | -0.58208600 | -0.11317900 | -2.96423500 |
| H | -2.28177100 | -0.60155300 | -2.89647400 |
| H | -1.84849100 | 1.09256000  | -3.16362600 |
| C | 1.39025500  | -4.52186200 | 1.52719800  |
| H | 2.02590700  | -5.34433700 | 1.90038100  |
| H | 1.12499800  | -3.91148500 | 2.39936600  |
| H | 0.47921800  | -4.98445400 | 1.13491600  |
| C | 1.28516600  | -5.00590500 | -1.68321600 |
| H | 1.81692700  | -5.96705700 | -1.79750600 |
| H | 0.34590900  | -5.21554200 | -1.16019000 |
| H | 1.02851300  | -4.65902100 | -2.69382400 |
| C | 3.70164100  | -2.44621600 | 2.15590100  |
| H | 4.31117900  | -1.53505000 | 2.14626100  |
| H | 2.85222500  | -2.27142900 | 2.83112400  |
| H | 4.31396600  | -3.24648700 | 2.60719900  |
| C | 3.81108600  | -3.54275200 | -2.92280100 |
| H | 4.38436700  | -4.48619500 | -2.94847000 |
| H | 3.01014800  | -3.63085300 | -3.66863200 |
| H | 4.48847200  | -2.74368800 | -3.24908000 |
| C | 5.26647600  | -1.85177700 | -0.61151100 |
| H | 5.41184500  | -1.10200800 | 0.17466200  |
| H | 6.10558200  | -2.56634400 | -0.54361600 |
| H | 5.35622000  | -1.33913700 | -1.57880500 |
| H | 5.12703800  | 4.11780400  | 1.95768400  |
| H | 2.35659000  | 0.83490500  | 2.54969300  |
| H | 4.08452500  | 1.53706300  | -1.37872200 |

|                |            |            |             |
|----------------|------------|------------|-------------|
| O              | 5.51893600 | 3.55294200 | -0.75607100 |
| C              | 6.19852600 | 4.79400600 | -0.36817800 |
| H              | 6.70868400 | 5.13018800 | -1.27872900 |
| H              | 5.47482400 | 5.55965000 | -0.04356900 |
| H              | 6.94123600 | 4.61506400 | 0.42767500  |
| Frequencies -- | -230.3405  | 12.5821    | 17.5401     |
| Frequencies -- | 19.3263    | 21.3563    | 28.6708     |
| Frequencies -- | 34.6845    | 36.6179    | 41.4301     |
| Frequencies -- | 47.3382    | 48.4678    | 51.3100     |
| Frequencies -- | 56.0670    | 57.6556    | 62.3787     |
| Frequencies -- | 72.4492    | 81.5589    | 91.2549     |
| Frequencies -- | 94.7145    | 103.9592   | 109.9716    |
| Frequencies -- | 110.4429   | 115.9322   | 120.8715    |
| Frequencies -- | 124.8225   | 126.9630   | 129.2815    |
| Frequencies -- | 133.2653   | 137.6658   | 143.1163    |
| Frequencies -- | 147.3942   | 149.6617   | 154.2571    |
| Frequencies -- | 157.5500   | 162.9626   | 164.5870    |
| Frequencies -- | 167.2300   | 175.5859   | 183.9403    |
| Frequencies -- | 186.0854   | 195.3703   | 200.1739    |
| Frequencies -- | 203.7237   | 209.6339   | 222.0540    |
| Frequencies -- | 230.0565   | 234.8804   | 243.3130    |
| Frequencies -- | 252.7482   | 261.0798   | 264.1786    |
| Frequencies -- | 265.2896   | 267.1299   | 268.0795    |
| Frequencies -- | 271.6728   | 274.3074   | 277.7456    |
| Frequencies -- | 280.6159   | 282.6498   | 289.2348    |
| Frequencies -- | 295.0976   | 297.5677   | 300.9720    |
| Frequencies -- | 302.0139   | 305.5678   | 308.8936    |
| Frequencies -- | 311.8410   | 317.0809   | 319.5556    |
| Frequencies -- | 323.4037   | 330.1292   | 333.6665    |
| Frequencies -- | 364.8900   | 371.2641   | 375.5461    |
| Frequencies -- | 381.0691   | 387.9522   | 397.7549    |
| Frequencies -- | 407.4288   | 410.1373   | 422.7613    |
| Frequencies -- | 424.6233   | 431.9303   | 434.1240    |
| Frequencies -- | 441.0770   | 450.3503   | 454.7738    |
| Frequencies -- | 456.0567   | 478.6743   | 485.0397    |
| Frequencies -- | 508.2483   | 529.3422   | 535.6479    |
| Frequencies -- | 540.1988   | 542.6113   | 551.3769    |
| Frequencies -- | 551.6217   | 558.9667   | 571.4422    |
| Frequencies -- | 585.2755   | 590.9224   | 593.4845    |
| Frequencies -- | 603.6378   | 606.1074   | 615.9515    |
| Frequencies -- | 629.2691   | 637.3390   | 642.1760    |
| Frequencies -- | 644.7317   | 647.2550   | 649.5619    |
| Frequencies -- | 672.4226   | 676.6005   | 690.8133    |
| Frequencies -- | 692.8409   | 714.0987   | 717.1880    |
| Frequencies -- | 719.8882   | 738.2410   | 751.5228    |
| Frequencies -- | 765.8938   | 781.6343   | 784.5295    |
| Frequencies -- | 799.7416   | 805.4802   | 828.9915    |
| Frequencies -- | 835.8895   | 874.9381   | 889.5606    |
| Frequencies -- | 897.6753   | 907.7681   | 917.5608    |
| Frequencies -- | 951.0987   | 965.5572   | 966.9379    |
| Frequencies -- | 970.2537   | 986.0121   | 988.6109    |
| Frequencies -- | 991.0761   | 995.6370   | 1022.9529   |
| Frequencies -- | 1035.2766  | 1038.3378  | 1040.4293   |
| Frequencies -- | 1041.1129  | 1045.3681  | 1046.9703   |
| Frequencies -- | 1048.8827  | 1057.9322  | 1059.4398   |
| Frequencies -- | 1084.5051  | 1085.7202  | 1087.4014   |
| Frequencies -- | 1100.2723  | 1123.3083  | 1125.1702   |
| Frequencies -- | 1160.4952  | 1171.3689  | 1173.4645   |
| Frequencies -- | 1174.1458  | 1176.0368  | 1191.8380   |
| Frequencies -- | 1201.9473  | 1213.8483  | 1222.1253   |
| Frequencies -- | 1245.7515  | 1269.0306  | 1300.4195   |



|                |           |           |           |
|----------------|-----------|-----------|-----------|
| Frequencies -- | 1311.1409 | 1327.6361 | 1334.7542 |
| Frequencies -- | 1342.2058 | 1356.8397 | 1368.6182 |
| Frequencies -- | 1378.6957 | 1385.1351 | 1410.7580 |
| Frequencies -- | 1414.8582 | 1415.0520 | 1422.9547 |
| Frequencies -- | 1423.6310 | 1426.4869 | 1428.0936 |
| Frequencies -- | 1430.8828 | 1432.3656 | 1435.8230 |
| Frequencies -- | 1445.6441 | 1447.4997 | 1450.0374 |
| Frequencies -- | 1454.4806 | 1456.2920 | 1457.4898 |
| Frequencies -- | 1462.1429 | 1471.3723 | 1472.9362 |
| Frequencies -- | 1481.8657 | 1483.8456 | 1484.8860 |
| Frequencies -- | 1488.6638 | 1491.9669 | 1492.6031 |
| Frequencies -- | 1494.7528 | 1498.3494 | 1500.9643 |
| Frequencies -- | 1504.4707 | 1506.1578 | 1506.8563 |
| Frequencies -- | 1508.6678 | 1515.7658 | 1516.9445 |
| Frequencies -- | 1574.0548 | 1585.4285 | 1588.4934 |
| Frequencies -- | 1597.3242 | 1598.6701 | 1617.5074 |
| Frequencies -- | 1620.1821 | 1622.2205 | 2997.7765 |
| Frequencies -- | 3008.7284 | 3009.9744 | 3010.3171 |
| Frequencies -- | 3010.8772 | 3012.3196 | 3014.7499 |
| Frequencies -- | 3036.8621 | 3098.7136 | 3100.5384 |
| Frequencies -- | 3101.4233 | 3102.9835 | 3105.0148 |
| Frequencies -- | 3110.5431 | 3119.0448 | 3137.4595 |
| Frequencies -- | 3145.4244 | 3150.1883 | 3156.7736 |
| Frequencies -- | 3159.4774 | 3160.9863 | 3161.2218 |
| Frequencies -- | 3170.4082 | 3175.7992 | 3212.9272 |
| Frequencies -- | 3216.4425 | 3225.7262 | 3233.1243 |

**Catalyst 18:**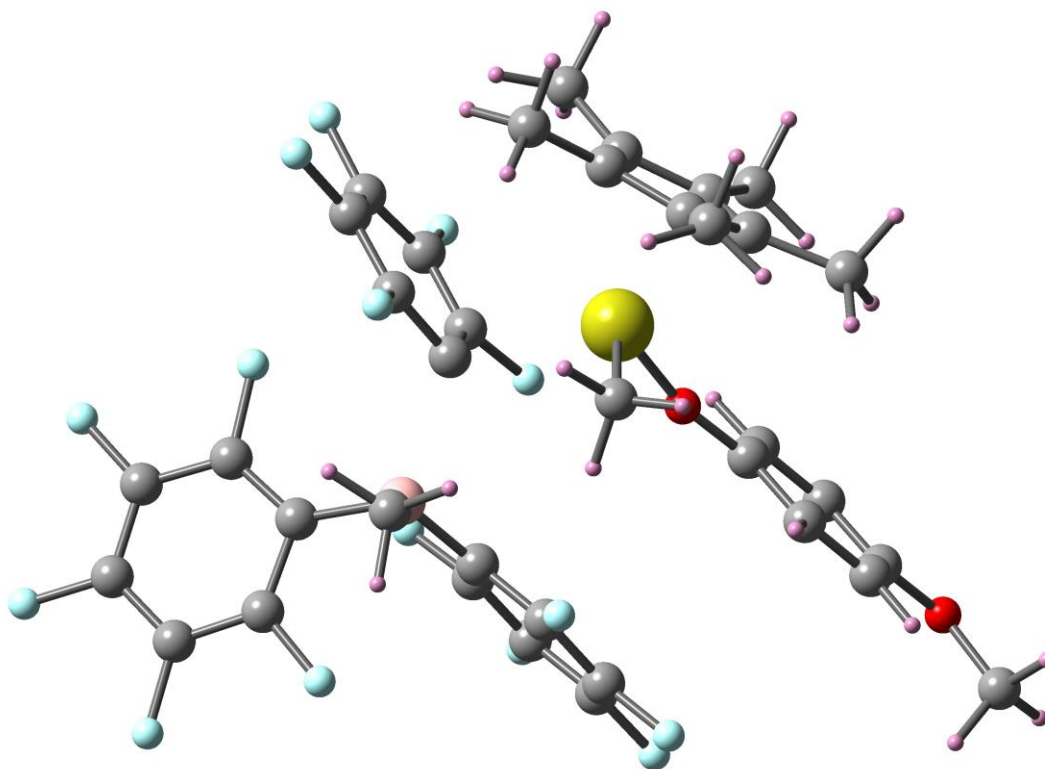

| <b>vacuum</b> | <b>toluene-like solvent</b> | <b>D3 dispersion</b> |
|---------------|-----------------------------|----------------------|
| -3156.8203557 | -3156.8310842               | -0.57737150          |

Imaginary frequency corresponding to vibration along the reaction coordinate:  $-233 \text{ cm}^{-1}$ .

|    |             |             |             |
|----|-------------|-------------|-------------|
| Ti | 1.74033100  | -1.67065800 | -0.72974700 |
| C  | 1.77303800  | -1.29127500 | -2.76892700 |
| H  | 1.28969400  | -0.30584200 | -2.82128400 |
| H  | 2.75934100  | -1.22493300 | -3.24484000 |
| H  | 1.16300000  | -2.04601000 | -3.29166400 |
| O  | 2.42478400  | -0.12547000 | -0.20016000 |
| C  | 3.19951200  | 0.93759700  | 0.23622500  |
| C  | 3.20884800  | 1.30121400  | 1.60811200  |
| C  | 3.95341500  | 1.68131200  | -0.69968300 |
| C  | 3.97384900  | 2.39670700  | 2.03037900  |
| C  | 4.72199800  | 2.78226800  | -0.27584500 |
| C  | 4.73617500  | 3.14613300  | 1.09495100  |
| H  | 3.98404000  | 2.70162600  | 3.07645900  |
| H  | 5.28170800  | 3.34831000  | -1.01816500 |
| C  | 2.06667100  | -3.84800600 | 0.47800200  |
| C  | 1.98697300  | -4.17820100 | -0.92591400 |
| C  | 3.19715300  | -2.96711400 | 0.67335100  |
| C  | 3.09786600  | -3.54196000 | -1.59493300 |
| C  | 3.84125200  | -2.78235500 | -0.60861500 |
| F  | -7.47511100 | 1.65294100  | -0.05446900 |
| C  | -6.13381100 | 1.34699700  | -0.23233600 |
| C  | -5.56511700 | 0.22275200  | 0.38343300  |

|   |             |             |             |
|---|-------------|-------------|-------------|
| C | -5.31165900 | 2.15712500  | -1.03298200 |
| C | -4.19925800 | -0.06743300 | 0.18483400  |
| F | -6.34829400 | -0.59461800 | 1.19084900  |
| C | -3.95600300 | 1.81857400  | -1.19727900 |
| F | -5.84265000 | 3.28192700  | -1.65344400 |
| C | -3.31841100 | 0.69352100  | -0.60728700 |
| F | -3.74107600 | -1.19738300 | 0.87406400  |
| F | -3.21893600 | 2.69669300  | -2.00851000 |
| B | -1.72540100 | 0.46239600  | -1.05757600 |
| C | -0.80384600 | -1.26964700 | -0.04167100 |
| C | -1.41820900 | -2.49393500 | -0.41929400 |
| C | -0.67233500 | -1.14645400 | 1.36914100  |
| C | -1.94606800 | -3.44382500 | 0.47099000  |
| F | -1.52399100 | -2.82660500 | -1.78170600 |
| C | -1.18728500 | -2.05062900 | 2.31336300  |
| F | 0.04526700  | -0.06561600 | 1.90647800  |
| C | -1.84817200 | -3.20398100 | 1.85293600  |
| F | -2.53100000 | -4.62537900 | 0.02209800  |
| F | -1.02143700 | -1.85856400 | 3.68147100  |
| F | -2.33838000 | -4.12970200 | 2.75452600  |
| C | -0.84295400 | 1.74923100  | -0.56710800 |
| C | 0.08870800  | 2.42795300  | -1.38689200 |
| C | -1.07690300 | 2.40496400  | 0.66916500  |
| C | 0.73134200  | 3.62973700  | -1.03490800 |
| C | -0.44755400 | 3.59603700  | 1.07432800  |
| C | 0.46670300  | 4.22011700  | 0.20984200  |
| F | -1.98958900 | 1.87002600  | 1.58389100  |
| F | -0.72039300 | 4.16147500  | 2.31455200  |
| F | 1.10866000  | 5.39131100  | 0.58499900  |
| F | 1.63483800  | 4.23303900  | -1.90546200 |
| F | 0.43302100  | 1.92751000  | -2.64931100 |
| C | -1.74270500 | 0.02233000  | -2.60907500 |
| H | -0.79393200 | -0.34130800 | -3.00457800 |
| H | -2.50147200 | -0.75210100 | -2.78609600 |
| H | -2.02816500 | 0.89755200  | -3.21418100 |
| C | 1.32227100  | -4.53491200 | 1.59963300  |
| H | 1.94874000  | -5.36303700 | 1.97571300  |
| H | 1.12596500  | -3.87800100 | 2.45598700  |
| H | 0.37623800  | -4.98038700 | 1.27671200  |
| C | 1.04071600  | -5.16531900 | -1.57238900 |
| H | 1.53796200  | -6.14536800 | -1.68106300 |
| H | 0.13003600  | -5.32721600 | -0.98515600 |
| H | 0.73122800  | -4.84875800 | -2.57818500 |
| C | 3.71514200  | -2.50364800 | 2.01581500  |
| H | 4.35106300  | -1.61467200 | 1.93413000  |
| H | 2.90423000  | -2.27074700 | 2.72071300  |
| H | 4.32362900  | -3.30150800 | 2.47686000  |
| C | 3.55084900  | -3.85374800 | -3.00053000 |
| H | 4.09217000  | -4.81622000 | -3.00163700 |
| H | 2.71282100  | -3.95386100 | -3.70284300 |
| H | 4.23685700  | -3.09651200 | -3.40024800 |
| C | 5.15911100  | -2.08379600 | -0.85178400 |
| H | 5.35621400  | -1.29348100 | -0.11796100 |
| H | 5.98562000  | -2.81240400 | -0.77940200 |
| H | 5.21426500  | -1.63068000 | -1.85115800 |
| H | 2.60229500  | 0.74501400  | 2.32034500  |
| H | 3.92185600  | 1.41006000  | -1.75466500 |

|                |            |            |            |
|----------------|------------|------------|------------|
| O              | 5.45105900 | 4.21451100 | 1.63922100 |
| C              | 6.18438400 | 5.11329600 | 0.74026000 |
| H              | 5.50697100 | 5.58817600 | 0.01149200 |
| H              | 6.61422600 | 5.87784000 | 1.39820000 |
| H              | 6.99388800 | 4.58136700 | 0.21225500 |
|                |            |            |            |
| Frequencies -- | -232.5143  | 12.2048    | 17.0736    |
| Frequencies -- | 19.6582    | 21.7160    | 28.2632    |
| Frequencies -- | 33.9026    | 35.8055    | 41.2931    |
| Frequencies -- | 42.8068    | 48.1332    | 50.7645    |
| Frequencies -- | 54.9382    | 56.8118    | 62.5453    |
| Frequencies -- | 73.8491    | 86.6179    | 90.4832    |
| Frequencies -- | 92.0287    | 96.4410    | 103.3916   |
| Frequencies -- | 110.5520   | 114.8643   | 117.0903   |
| Frequencies -- | 121.1897   | 125.2515   | 128.4762   |
| Frequencies -- | 130.8977   | 135.7683   | 136.9775   |
| Frequencies -- | 143.1919   | 144.1611   | 148.7697   |
| Frequencies -- | 157.0653   | 157.4810   | 164.8670   |
| Frequencies -- | 168.5621   | 173.9894   | 183.4121   |
| Frequencies -- | 190.1761   | 199.9733   | 200.8731   |
| Frequencies -- | 207.1515   | 217.4318   | 223.2657   |
| Frequencies -- | 227.2605   | 234.4519   | 236.5319   |
| Frequencies -- | 242.8231   | 261.8306   | 264.3726   |
| Frequencies -- | 266.0063   | 266.8662   | 269.6984   |
| Frequencies -- | 271.8108   | 272.4285   | 275.7325   |
| Frequencies -- | 277.6555   | 281.7006   | 289.6654   |
| Frequencies -- | 292.0494   | 296.2681   | 300.6401   |
| Frequencies -- | 303.3603   | 304.1351   | 306.7119   |
| Frequencies -- | 309.5230   | 315.5308   | 318.8786   |
| Frequencies -- | 328.4559   | 333.0953   | 348.0267   |
| Frequencies -- | 369.8056   | 374.9124   | 380.6849   |
| Frequencies -- | 383.6451   | 398.9347   | 408.6958   |
| Frequencies -- | 414.2949   | 418.0273   | 422.1145   |
| Frequencies -- | 424.4521   | 431.2099   | 433.0967   |
| Frequencies -- | 433.8044   | 441.2763   | 450.3875   |
| Frequencies -- | 454.5916   | 483.6517   | 484.6844   |
| Frequencies -- | 503.9405   | 521.3210   | 529.8521   |
| Frequencies -- | 535.7583   | 539.3255   | 542.6234   |
| Frequencies -- | 551.2184   | 552.1794   | 570.9057   |
| Frequencies -- | 578.5497   | 585.6394   | 590.0643   |
| Frequencies -- | 591.2541   | 604.3099   | 610.2114   |
| Frequencies -- | 628.6568   | 637.3610   | 637.6609   |
| Frequencies -- | 641.4776   | 644.0314   | 647.5023   |
| Frequencies -- | 672.2205   | 683.7007   | 691.1804   |
| Frequencies -- | 712.7592   | 714.2552   | 716.6500   |
| Frequencies -- | 719.6734   | 737.6573   | 751.0355   |
| Frequencies -- | 769.1334   | 781.8827   | 800.0214   |
| Frequencies -- | 806.7380   | 807.2350   | 828.8821   |
| Frequencies -- | 830.7584   | 889.2437   | 897.4052   |
| Frequencies -- | 907.5997   | 917.0854   | 924.6106   |
| Frequencies -- | 949.9023   | 964.5588   | 972.5216   |
| Frequencies -- | 973.5015   | 985.6462   | 990.2871   |
| Frequencies -- | 990.7927   | 997.2904   | 1010.8786  |
| Frequencies -- | 1034.8244  | 1038.2787  | 1040.8302  |
| Frequencies -- | 1042.1575  | 1046.1891  | 1047.0300  |
| Frequencies -- | 1047.9585  | 1057.2157  | 1059.3983  |
| Frequencies -- | 1085.8175  | 1086.5606  | 1087.7325  |
| Frequencies -- | 1123.4510  | 1124.8484  | 1126.2456  |
| Frequencies -- | 1171.9571  | 1173.1142  | 1173.8369  |
| Frequencies -- | 1175.9446  | 1185.2175  | 1188.4248  |
| Frequencies -- | 1214.0260  | 1221.8361  | 1228.0072  |
| Frequencies -- | 1245.8694  | 1259.6162  | 1311.0962  |

|                |           |           |           |
|----------------|-----------|-----------|-----------|
| Frequencies -- | 1317.6009 | 1326.9051 | 1335.8000 |
| Frequencies -- | 1342.0401 | 1357.0234 | 1361.0191 |
| Frequencies -- | 1368.8998 | 1378.5716 | 1412.3927 |
| Frequencies -- | 1414.4519 | 1414.5937 | 1422.1106 |
| Frequencies -- | 1423.7850 | 1425.7868 | 1428.9502 |
| Frequencies -- | 1430.6701 | 1431.9045 | 1435.6240 |
| Frequencies -- | 1438.3752 | 1446.9876 | 1450.2997 |
| Frequencies -- | 1454.6840 | 1455.9080 | 1457.1367 |
| Frequencies -- | 1462.6393 | 1471.2108 | 1472.9295 |
| Frequencies -- | 1482.7745 | 1485.5041 | 1487.0775 |
| Frequencies -- | 1489.9677 | 1490.5372 | 1493.4632 |
| Frequencies -- | 1499.0068 | 1500.1518 | 1501.2726 |
| Frequencies -- | 1502.0254 | 1506.2111 | 1507.3886 |
| Frequencies -- | 1508.9491 | 1516.2750 | 1518.1600 |
| Frequencies -- | 1574.6162 | 1580.1639 | 1585.2317 |
| Frequencies -- | 1596.9332 | 1597.8060 | 1620.1885 |
| Frequencies -- | 1622.1695 | 1624.3750 | 2998.0224 |
| Frequencies -- | 3008.3288 | 3008.6452 | 3009.6456 |
| Frequencies -- | 3010.2173 | 3012.0025 | 3015.1257 |
| Frequencies -- | 3037.1135 | 3097.1596 | 3099.0978 |
| Frequencies -- | 3100.8047 | 3101.3553 | 3103.4140 |
| Frequencies -- | 3111.3454 | 3120.5704 | 3136.7782 |
| Frequencies -- | 3146.2434 | 3150.1744 | 3155.6427 |
| Frequencies -- | 3157.5332 | 3158.2789 | 3162.3872 |
| Frequencies -- | 3170.3583 | 3196.7179 | 3202.9066 |
| Frequencies -- | 3205.0495 | 3217.9245 | 3226.9207 |

**Catalyst 19:**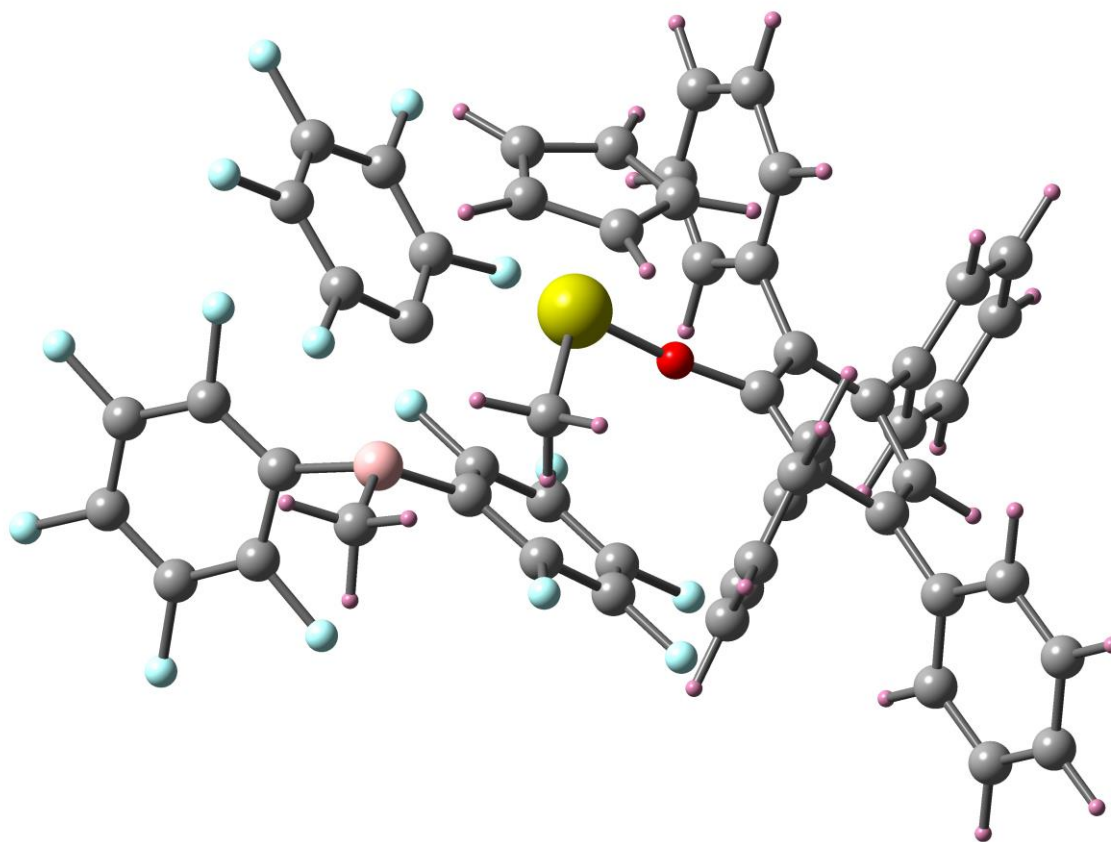

| vacuum        | toluene-like solvent | D3 dispersion |
|---------------|----------------------|---------------|
| -3769.6474055 | -3769.6617719        | -0.79700999   |

Imaginary frequency corresponding to vibration along the reaction coordinate:  $-214 \text{ cm}^{-1}$ .

|    |             |             |             |
|----|-------------|-------------|-------------|
| Ti | 0.07437800  | 2.42530100  | 0.48442900  |
| C  | -0.01169300 | 3.25899500  | -1.39686300 |
| H  | -0.08788300 | 2.36196400  | -2.02731900 |
| H  | -0.83938800 | 3.93257500  | -1.63324400 |
| H  | 0.94758200  | 3.77549900  | -1.55383200 |
| O  | -1.32542000 | 1.31949300  | 0.42389600  |
| C  | -2.52919600 | 0.60345700  | 0.44806900  |
| C  | -2.73516700 | -0.39472300 | 1.45845200  |
| C  | -3.47648100 | 0.83608000  | -0.60374700 |
| C  | -3.83244600 | -1.29309800 | 1.29246600  |
| C  | -4.56483300 | -0.07521500 | -0.73721400 |
| C  | -4.68924500 | -1.14075400 | 0.18025700  |
| C  | 1.14248100  | 3.83820100  | 2.24532300  |
| C  | 0.81005700  | 4.74982000  | 1.19597500  |
| C  | -0.06654400 | 3.22069700  | 2.71125200  |
| C  | -0.61154800 | 4.70917000  | 1.01121600  |
| C  | -1.15737200 | 3.77249000  | 1.95576900  |
| F  | 7.69046900  | -3.02932200 | -2.34633100 |
| C  | 6.52363200  | -2.32715300 | -2.08418700 |
| C  | 6.46015200  | -1.40709700 | -1.02762300 |

|   |             |             |             |
|---|-------------|-------------|-------------|
| C | 5.37659600  | -2.51984000 | -2.87218500 |
| C | 5.26161400  | -0.70499000 | -0.78300300 |
| F | 7.57569700  | -1.19556900 | -0.22584000 |
| C | 4.20922300  | -1.79020000 | -2.58339400 |
| F | 5.40485600  | -3.42627800 | -3.92517000 |
| C | 4.07608400  | -0.84619900 | -1.52928800 |
| F | 5.31458700  | 0.17295300  | 0.30725600  |
| F | 3.11759400  | -2.05527500 | -3.42731700 |
| B | 2.61800100  | -0.03498300 | -1.48039300 |
| C | 2.45102700  | 1.30907800  | 0.25807700  |
| C | 3.37807800  | 2.38762800  | 0.18202400  |
| C | 2.48797900  | 0.66118900  | 1.52362100  |
| C | 4.29951400  | 2.73300400  | 1.18553200  |
| F | 3.41185300  | 3.20450900  | -0.95689000 |
| C | 3.38491100  | 0.95026600  | 2.56689900  |
| F | 1.53830200  | -0.33031600 | 1.79743400  |
| C | 4.31391500  | 1.99138500  | 2.38258900  |
| F | 5.18219100  | 3.79610400  | 1.03074200  |
| F | 3.35826000  | 0.25935200  | 3.77214400  |
| F | 5.20970000  | 2.30845800  | 3.38531600  |
| C | 1.40585300  | -1.11659200 | -1.27777300 |
| C | 0.20298500  | -1.09855600 | -2.02170500 |
| C | 1.54428700  | -2.27497800 | -0.47052200 |
| C | -0.77228800 | -2.11327300 | -1.98397600 |
| C | 0.59391900  | -3.30886600 | -0.38923500 |
| C | -0.57734600 | -3.23160000 | -1.16017600 |
| F | 2.68518800  | -2.45047900 | 0.31722500  |
| F | 0.79438500  | -4.39855800 | 0.45117800  |
| F | -1.53738900 | -4.23238300 | -1.08958800 |
| F | -1.92979000 | -2.01589900 | -2.75312200 |
| F | -0.09122600 | -0.03166100 | -2.87871500 |
| C | 2.60636500  | 0.96769300  | -2.74276900 |
| H | 1.79294800  | 1.69351100  | -2.76095400 |
| H | 3.55424300  | 1.51859200  | -2.81290500 |
| H | 2.51740100  | 0.36339500  | -3.66028800 |
| H | -5.52345600 | -1.83177300 | 0.06621300  |
| C | -4.15248300 | -2.41001000 | 2.25480800  |
| C | -4.03114800 | -3.75931900 | 1.83265000  |
| C | -4.65603600 | -2.15269900 | 3.55510800  |
| C | -4.38714800 | -4.82125100 | 2.69140400  |
| H | -3.64861100 | -3.98129000 | 0.83461000  |
| C | -5.01810400 | -3.21255600 | 4.41289400  |
| H | -4.77376800 | -1.12316300 | 3.89605500  |
| C | -4.88207400 | -4.55202900 | 3.98605200  |
| H | -4.27595700 | -5.85281500 | 2.34919200  |
| H | -5.40674800 | -2.99191400 | 5.40997100  |
| H | -5.15955100 | -5.37299000 | 4.65127900  |
| C | -5.61534900 | 0.03852900  | -1.81325200 |
| C | -6.59878200 | 1.05958300  | -1.78300500 |
| C | -5.68292200 | -0.93516600 | -2.84279600 |
| C | -7.61734600 | 1.11137900  | -2.75772100 |
| H | -6.57464000 | 1.81093200  | -0.99208900 |
| C | -6.69745800 | -0.88156100 | -3.82283700 |
| H | -4.93295200 | -1.72776100 | -2.88321200 |
| C | -7.66938100 | 0.14229300  | -3.78392000 |
| H | -8.36854400 | 1.90367100  | -2.71362600 |
| H | -6.72664400 | -1.63634600 | -4.61227400 |

|                |             |             |             |
|----------------|-------------|-------------|-------------|
| H              | -8.45677000 | 0.18278200  | -4.54020700 |
| C              | -1.88669600 | -0.50005600 | 2.69904900  |
| C              | -1.01700200 | -1.59528900 | 2.92053600  |
| C              | -2.05413700 | 0.44422100  | 3.74504300  |
| C              | -0.31911800 | -1.73387700 | 4.13708900  |
| H              | -0.88614700 | -2.34676000 | 2.14337500  |
| C              | -1.36601300 | 0.30424100  | 4.96923500  |
| H              | -2.75594100 | 1.27146800  | 3.61655900  |
| C              | -0.48831100 | -0.78428500 | 5.16734000  |
| H              | 0.35698700  | -2.57973100 | 4.27586100  |
| H              | -1.52503400 | 1.03353100  | 5.76764100  |
| H              | 0.05026300  | -0.89450800 | 6.11100500  |
| C              | -3.39193500 | 2.01931300  | -1.53227700 |
| C              | -3.76668800 | 3.30585300  | -1.06557500 |
| C              | -3.06432600 | 1.86964700  | -2.90257700 |
| C              | -3.81958100 | 4.41075900  | -1.94170200 |
| H              | -4.05573500 | 3.43637400  | -0.02011300 |
| C              | -3.11000600 | 2.97278000  | -3.78005500 |
| H              | -2.77846700 | 0.89027200  | -3.28487700 |
| C              | -3.49097000 | 4.24726400  | -3.30579300 |
| H              | -4.13335200 | 5.38797800  | -1.56581600 |
| H              | -2.85481000 | 2.83413600  | -4.83295600 |
| H              | -3.53895100 | 5.09747500  | -3.98992900 |
| H              | 2.12922900  | 3.67086200  | 2.65351200  |
| H              | 1.50940400  | 5.35079900  | 0.62223800  |
| H              | -0.14506200 | 2.49116800  | 3.50798300  |
| H              | -1.17813000 | 5.28929300  | 0.29247900  |
| H              | -2.20556700 | 3.52169500  | 2.07276700  |
| Frequencies -- | -214.2738   | 11.8705     | 14.9190     |
| Frequencies -- | 20.8417     | 22.9484     | 25.8953     |
| Frequencies -- | 29.9370     | 32.3859     | 35.3777     |
| Frequencies -- | 37.9387     | 39.5932     | 43.6233     |
| Frequencies -- | 44.4376     | 46.9914     | 47.3561     |
| Frequencies -- | 53.3406     | 54.9163     | 56.4920     |
| Frequencies -- | 58.5097     | 63.0220     | 67.2430     |
| Frequencies -- | 71.6538     | 73.1640     | 80.4645     |
| Frequencies -- | 86.3619     | 89.2033     | 98.5953     |
| Frequencies -- | 103.1302    | 108.8595    | 112.7097    |
| Frequencies -- | 118.0274    | 119.2471    | 122.7843    |
| Frequencies -- | 127.3400    | 136.1222    | 136.8420    |
| Frequencies -- | 142.9598    | 145.4331    | 151.0297    |
| Frequencies -- | 157.3300    | 165.9240    | 177.9922    |
| Frequencies -- | 191.5973    | 193.4425    | 197.6532    |
| Frequencies -- | 203.3483    | 210.6172    | 211.9558    |
| Frequencies -- | 221.2141    | 229.0747    | 230.0281    |
| Frequencies -- | 237.5379    | 241.2313    | 245.7006    |
| Frequencies -- | 250.9430    | 254.4360    | 263.1324    |
| Frequencies -- | 265.1170    | 265.5016    | 267.1284    |
| Frequencies -- | 268.5103    | 270.9452    | 276.4314    |
| Frequencies -- | 277.2738    | 282.3808    | 290.3670    |
| Frequencies -- | 296.5298    | 303.5061    | 304.8820    |
| Frequencies -- | 306.4319    | 318.3674    | 322.1792    |
| Frequencies -- | 322.9281    | 328.8205    | 333.4750    |
| Frequencies -- | 340.1374    | 352.6978    | 372.3764    |
| Frequencies -- | 375.8719    | 379.8370    | 405.5300    |
| Frequencies -- | 405.8610    | 407.0233    | 408.8081    |
| Frequencies -- | 409.3121    | 410.6905    | 412.3113    |
| Frequencies -- | 423.6440    | 425.9336    | 431.8584    |
| Frequencies -- | 433.8303    | 437.2105    | 442.9034    |



|                |           |           |           |
|----------------|-----------|-----------|-----------|
| Frequencies -- | 451.5385  | 455.2459  | 486.5040  |
| Frequencies -- | 494.9865  | 506.1744  | 521.0826  |
| Frequencies -- | 525.9126  | 540.7502  | 542.9906  |
| Frequencies -- | 544.9425  | 550.0459  | 551.5176  |
| Frequencies -- | 563.1125  | 571.0200  | 574.7613  |
| Frequencies -- | 592.9121  | 612.1913  | 615.8048  |
| Frequencies -- | 617.5024  | 619.7945  | 623.6994  |
| Frequencies -- | 625.2941  | 629.4720  | 634.4546  |
| Frequencies -- | 637.5300  | 640.5324  | 642.2566  |
| Frequencies -- | 643.1289  | 651.6551  | 652.6042  |
| Frequencies -- | 674.0257  | 683.8126  | 689.7182  |
| Frequencies -- | 694.2653  | 702.4602  | 711.1987  |
| Frequencies -- | 712.0901  | 714.0906  | 715.1251  |
| Frequencies -- | 716.5278  | 717.2118  | 719.9946  |
| Frequencies -- | 738.1457  | 741.1432  | 744.8380  |
| Frequencies -- | 750.5437  | 766.8039  | 773.7245  |
| Frequencies -- | 782.5532  | 782.9501  | 795.9426  |
| Frequencies -- | 806.6237  | 812.7434  | 816.0109  |
| Frequencies -- | 825.9007  | 832.2782  | 843.9058  |
| Frequencies -- | 846.5920  | 857.9361  | 859.8233  |
| Frequencies -- | 862.0144  | 867.1599  | 869.1646  |
| Frequencies -- | 887.0538  | 894.5172  | 899.1315  |
| Frequencies -- | 907.8727  | 913.4867  | 914.1958  |
| Frequencies -- | 920.7785  | 935.6127  | 936.8875  |
| Frequencies -- | 941.6724  | 943.7083  | 963.0733  |
| Frequencies -- | 986.2495  | 987.9288  | 988.7330  |
| Frequencies -- | 992.5921  | 993.3892  | 994.9271  |
| Frequencies -- | 996.2023  | 996.7819  | 1004.2369 |
| Frequencies -- | 1006.1793 | 1009.7496 | 1010.9344 |
| Frequencies -- | 1015.6530 | 1020.1201 | 1025.2361 |
| Frequencies -- | 1033.9807 | 1036.4306 | 1040.4989 |
| Frequencies -- | 1042.4801 | 1043.6677 | 1046.1226 |
| Frequencies -- | 1050.3723 | 1054.5459 | 1054.7060 |
| Frequencies -- | 1057.0893 | 1059.9384 | 1083.4513 |
| Frequencies -- | 1090.1279 | 1090.5467 | 1091.1963 |
| Frequencies -- | 1092.0508 | 1092.5212 | 1099.0250 |
| Frequencies -- | 1119.4766 | 1127.5243 | 1133.7028 |
| Frequencies -- | 1178.3353 | 1183.0737 | 1183.2599 |
| Frequencies -- | 1183.4003 | 1184.1501 | 1194.8910 |
| Frequencies -- | 1204.5168 | 1205.6218 | 1207.6200 |
| Frequencies -- | 1208.2550 | 1214.8549 | 1220.6211 |
| Frequencies -- | 1227.8886 | 1250.7766 | 1253.2263 |
| Frequencies -- | 1277.3546 | 1289.1638 | 1300.6637 |
| Frequencies -- | 1310.5130 | 1315.8083 | 1327.9848 |
| Frequencies -- | 1328.2615 | 1330.5685 | 1333.9100 |
| Frequencies -- | 1335.2360 | 1336.6816 | 1341.9927 |
| Frequencies -- | 1356.8014 | 1366.4004 | 1368.3629 |
| Frequencies -- | 1369.8321 | 1370.6912 | 1373.7332 |
| Frequencies -- | 1377.5473 | 1379.0528 | 1395.3983 |
| Frequencies -- | 1402.4564 | 1414.4330 | 1422.1669 |
| Frequencies -- | 1427.4859 | 1440.5277 | 1443.2213 |
| Frequencies -- | 1444.8578 | 1445.6115 | 1447.0367 |
| Frequencies -- | 1448.8057 | 1450.5686 | 1452.2069 |
| Frequencies -- | 1452.8541 | 1469.5512 | 1473.0914 |
| Frequencies -- | 1494.4658 | 1496.1973 | 1497.1224 |
| Frequencies -- | 1502.1237 | 1503.0341 | 1507.4871 |
| Frequencies -- | 1524.4615 | 1571.1296 | 1582.6391 |
| Frequencies -- | 1588.0600 | 1594.0264 | 1595.6160 |
| Frequencies -- | 1596.3159 | 1596.9322 | 1598.0276 |
| Frequencies -- | 1598.5710 | 1619.1469 | 1622.6101 |
| Frequencies -- | 1623.3046 | 1623.9707 | 1624.2981 |
| Frequencies -- | 1624.7495 | 3021.2921 | 3035.0156 |
| Frequencies -- | 3118.9059 | 3148.2924 | 3148.5072 |

|                |           |           |           |
|----------------|-----------|-----------|-----------|
| Frequencies -- | 3149.8557 | 3153.2296 | 3154.0637 |
| Frequencies -- | 3161.2714 | 3161.8076 | 3163.0228 |
| Frequencies -- | 3165.4333 | 3171.7144 | 3174.9338 |
| Frequencies -- | 3175.0966 | 3177.2242 | 3183.3902 |
| Frequencies -- | 3185.8026 | 3187.6291 | 3189.0487 |
| Frequencies -- | 3190.8992 | 3192.8687 | 3194.2040 |
| Frequencies -- | 3195.7005 | 3208.3917 | 3210.1760 |
| Frequencies -- | 3216.2223 | 3249.9542 | 3264.5762 |
| Frequencies -- | 3281.1157 | 3288.6358 | 3310.9688 |

**Catalyst 20:****distal conformation**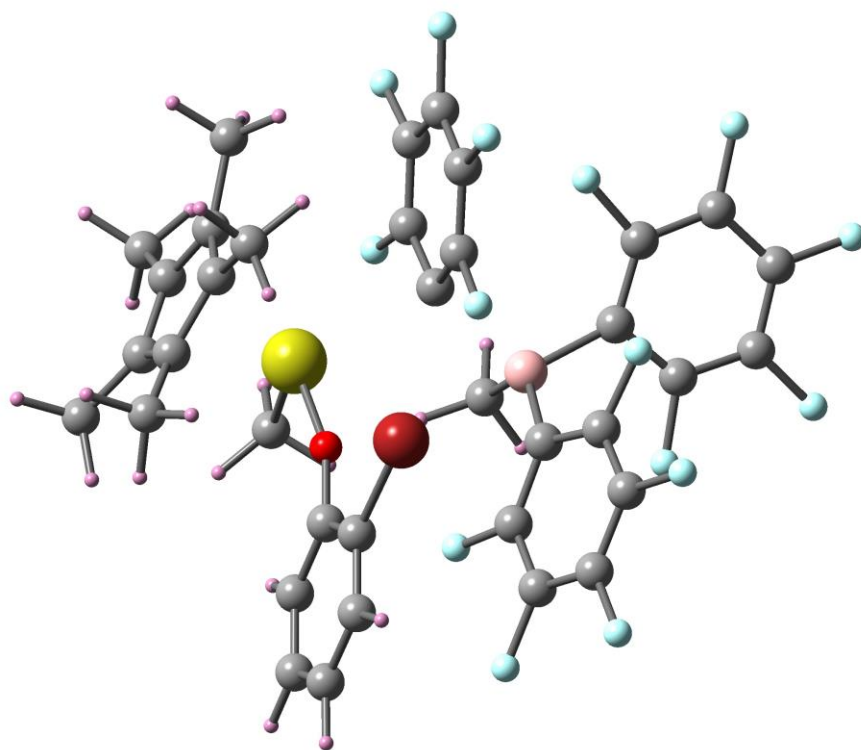

| <b>vacuum</b> | <b>toluene-like solvent</b> | <b>D3 dispersion</b> |
|---------------|-----------------------------|----------------------|
| -3054.8968084 | -3054.9073465               | -0.57255246          |

Imaginary frequency corresponding to vibration along the reaction coordinate:  $-233 \text{ cm}^{-1}$ .

|    |             |             |             |
|----|-------------|-------------|-------------|
| Ti | 1.98123500  | -1.17761200 | -0.76171800 |
| C  | 1.83090500  | -0.89486600 | -2.80808400 |
| H  | 1.17512100  | -0.01568500 | -2.86436700 |
| H  | 2.74424000  | -0.69792800 | -3.37946700 |
| H  | 1.32063700  | -1.77782300 | -3.22397900 |
| O  | 2.43879200  | 0.50979400  | -0.37517300 |
| C  | 3.10467500  | 1.71923600  | -0.37364600 |
| C  | 3.35198800  | 2.46118300  | 0.81376100  |
| C  | 3.54263300  | 2.25378300  | -1.61490500 |
| C  | 4.01470100  | 3.70533600  | 0.75215300  |
| C  | 4.20934100  | 3.48902700  | -1.67332400 |
| C  | 4.44758000  | 4.21841200  | -0.48809700 |
| H  | 4.18582100  | 4.26972800  | 1.66892000  |
| H  | 4.52445600  | 3.88656900  | -2.63955700 |
| C  | 2.59118700  | -3.50716300 | 0.01649900  |
| C  | 2.97128900  | -3.43682800 | -1.37069100 |
| C  | 3.32172100  | -2.48524200 | 0.73960800  |
| C  | 3.98097100  | -2.40948000 | -1.50485000 |
| C  | 4.20526200  | -1.82589100 | -0.19891100 |
| F  | -7.72888200 | 0.29988700  | -0.02639400 |

|   |             |             |             |
|---|-------------|-------------|-------------|
| C | -6.35722200 | 0.24671200  | -0.22606100 |
| C | -5.59245600 | -0.80001400 | 0.30835700  |
| C | -5.69981500 | 1.24112400  | -0.96924300 |
| C | -4.19958300 | -0.83108700 | 0.08871200  |
| F | -6.20939300 | -1.79666800 | 1.05631800  |
| C | -4.30811500 | 1.15809500  | -1.15753400 |
| F | -6.42742400 | 2.29479300  | -1.50991100 |
| C | -3.47448200 | 0.12659200  | -0.64555100 |
| F | -3.54262300 | -1.91150300 | 0.69183500  |
| F | -3.74895300 | 2.20387600  | -1.91012500 |
| B | -1.86876100 | 0.20991300  | -1.11063300 |
| C | -0.64089600 | -1.35676700 | -0.19889900 |
| C | -1.00069700 | -2.65014300 | -0.66911800 |
| C | -0.54818100 | -1.30786200 | 1.22037700  |
| C | -1.36087400 | -3.73472800 | 0.14598500  |
| F | -1.00314800 | -2.91619500 | -2.05012700 |
| C | -0.88437400 | -2.35809600 | 2.09307200  |
| F | -0.05785300 | -0.14767200 | 1.83315700  |
| C | -1.31813400 | -3.57783900 | 1.54300400  |
| F | -1.71032900 | -4.97033000 | -0.39153800 |
| F | -0.76570400 | -2.23289100 | 3.47325800  |
| F | -1.63534900 | -4.63873300 | 2.36986500  |
| C | -1.23731600 | 1.61569500  | -0.56142700 |
| C | -0.45848100 | 2.49335700  | -1.35078400 |
| C | -1.58763200 | 2.16374300  | 0.69963600  |
| C | -0.06645000 | 3.78579200  | -0.95390400 |
| C | -1.20366600 | 3.43930100  | 1.15106800  |
| C | -0.43700800 | 4.26445100  | 0.31209900  |
| F | -2.37562200 | 1.42737600  | 1.58969800  |
| F | -1.57689300 | 3.89301300  | 2.41020200  |
| F | -0.03996000 | 5.52546700  | 0.73257400  |
| F | 0.68720700  | 4.59178700  | -1.80188700 |
| F | -0.02505200 | 2.11321300  | -2.62871000 |
| C | -1.84096500 | -0.14095600 | -2.68625400 |
| H | -0.85318700 | -0.30000700 | -3.12038800 |
| H | -2.44844200 | -1.03219400 | -2.89625200 |
| H | -2.29975300 | 0.69734400  | -3.23452600 |
| C | 1.84790600  | -4.65757600 | 0.65441700  |
| H | 2.58057300  | -5.45242500 | 0.88232800  |
| H | 1.37429700  | -4.39167000 | 1.60519300  |
| H | 1.09424600  | -5.10421600 | -0.00320500 |
| C | 2.51173900  | -4.38133600 | -2.45714300 |
| H | 3.13178700  | -5.29510100 | -2.45019400 |
| H | 1.46816300  | -4.69640000 | -2.32355400 |
| H | 2.60003600  | -3.93889400 | -3.45735300 |
| C | 3.33188600  | -2.30891000 | 2.24130400  |
| H | 3.62142100  | -1.29514500 | 2.53970600  |
| H | 2.35695200  | -2.52095500 | 2.70003200  |
| H | 4.05950700  | -3.00617600 | 2.69306600  |
| C | 4.84307500  | -2.16930800 | -2.72142300 |
| H | 5.75107300  | -2.79401400 | -2.65269300 |
| H | 4.33704200  | -2.43802300 | -3.65667100 |
| H | 5.17713000  | -1.12605100 | -2.80259700 |
| C | 5.32984900  | -0.88279100 | 0.15792000  |
| H | 5.11953200  | -0.30331100 | 1.06386500  |
| H | 6.24603400  | -1.46834400 | 0.35047400  |
| H | 5.56225100  | -0.17366200 | -0.64672200 |

|    |            |            |             |
|----|------------|------------|-------------|
| H  | 3.33049400 | 1.69607400 | -2.52495000 |
| H  | 4.95377000 | 5.18427500 | -0.52234100 |
| Br | 2.77859300 | 1.80757300 | 2.56614100  |

|                |           |           |           |
|----------------|-----------|-----------|-----------|
| Frequencies -- | -232.8419 | 11.4178   | 13.3221   |
| Frequencies -- | 15.8869   | 27.4853   | 31.0272   |
| Frequencies -- | 32.8797   | 34.3086   | 38.2984   |
| Frequencies -- | 42.1078   | 46.9793   | 53.4844   |
| Frequencies -- | 55.6651   | 59.5242   | 62.0788   |
| Frequencies -- | 75.6033   | 83.1399   | 88.6652   |
| Frequencies -- | 92.8235   | 95.7340   | 110.3132  |
| Frequencies -- | 114.9393  | 115.6659  | 120.5980  |
| Frequencies -- | 125.3240  | 125.7004  | 127.8825  |
| Frequencies -- | 132.4593  | 133.8146  | 143.1551  |
| Frequencies -- | 149.4667  | 154.8804  | 156.5806  |
| Frequencies -- | 164.4995  | 168.0299  | 170.0579  |
| Frequencies -- | 172.8289  | 181.2336  | 185.5935  |
| Frequencies -- | 189.4715  | 198.7617  | 202.3759  |
| Frequencies -- | 209.3522  | 220.8461  | 222.8210  |
| Frequencies -- | 235.8752  | 243.8562  | 259.5600  |
| Frequencies -- | 263.8546  | 265.1252  | 266.3850  |
| Frequencies -- | 268.8122  | 270.7056  | 275.0638  |
| Frequencies -- | 277.6545  | 283.3122  | 287.7979  |
| Frequencies -- | 288.9255  | 295.0622  | 297.8138  |
| Frequencies -- | 301.1759  | 301.4910  | 302.8809  |
| Frequencies -- | 305.7046  | 308.4617  | 316.9631  |
| Frequencies -- | 319.3570  | 320.5168  | 329.2813  |
| Frequencies -- | 332.5205  | 345.4519  | 371.6722  |
| Frequencies -- | 375.2416  | 381.8388  | 382.6941  |
| Frequencies -- | 386.2384  | 404.7731  | 408.9562  |
| Frequencies -- | 422.6656  | 425.0963  | 431.4770  |
| Frequencies -- | 434.1563  | 441.4117  | 450.0580  |
| Frequencies -- | 452.5026  | 454.7770  | 485.0869  |
| Frequencies -- | 492.6782  | 496.8574  | 527.2374  |
| Frequencies -- | 534.7242  | 539.8310  | 540.5460  |
| Frequencies -- | 542.5619  | 551.4030  | 552.9974  |
| Frequencies -- | 570.5966  | 581.1323  | 591.3134  |
| Frequencies -- | 592.9670  | 601.0169  | 619.9452  |
| Frequencies -- | 629.1368  | 630.2418  | 637.2898  |
| Frequencies -- | 641.9497  | 643.6830  | 647.9928  |
| Frequencies -- | 670.6319  | 673.4086  | 692.1213  |
| Frequencies -- | 701.2070  | 710.1201  | 713.4676  |
| Frequencies -- | 716.7984  | 719.4376  | 737.1828  |
| Frequencies -- | 749.0187  | 765.7669  | 781.5884  |
| Frequencies -- | 800.9865  | 806.7383  | 827.9828  |
| Frequencies -- | 868.2822  | 891.1070  | 898.0958  |
| Frequencies -- | 907.5306  | 917.1927  | 920.8150  |
| Frequencies -- | 959.4987  | 968.0893  | 971.8072  |
| Frequencies -- | 985.4729  | 990.6343  | 993.5216  |
| Frequencies -- | 995.2322  | 1029.5304 | 1037.7111 |
| Frequencies -- | 1038.4727 | 1040.2776 | 1042.3348 |
| Frequencies -- | 1042.9289 | 1045.5907 | 1048.4407 |
| Frequencies -- | 1055.6369 | 1057.4946 | 1059.0470 |
| Frequencies -- | 1084.3831 | 1087.9170 | 1089.0962 |
| Frequencies -- | 1126.0359 | 1134.6876 | 1171.9763 |
| Frequencies -- | 1174.4517 | 1174.6468 | 1184.7859 |
| Frequencies -- | 1187.6878 | 1213.5348 | 1221.7239 |
| Frequencies -- | 1241.6903 | 1248.5846 | 1275.2758 |
| Frequencies -- | 1310.3540 | 1327.4422 | 1335.7104 |
| Frequencies -- | 1341.8371 | 1356.4046 | 1356.5220 |
| Frequencies -- | 1368.2205 | 1378.9898 | 1411.9014 |
| Frequencies -- | 1413.8828 | 1415.8430 | 1423.0026 |

|                |           |           |           |
|----------------|-----------|-----------|-----------|
| Frequencies -- | 1424.0737 | 1426.0260 | 1429.7629 |
| Frequencies -- | 1430.5570 | 1434.0230 | 1434.9949 |
| Frequencies -- | 1436.2766 | 1447.2283 | 1450.3449 |
| Frequencies -- | 1456.1344 | 1456.9714 | 1463.2999 |
| Frequencies -- | 1468.5372 | 1471.3549 | 1472.9793 |
| Frequencies -- | 1482.3184 | 1493.5380 | 1495.3971 |
| Frequencies -- | 1497.1822 | 1500.4184 | 1502.3358 |
| Frequencies -- | 1503.9129 | 1506.2432 | 1508.9509 |
| Frequencies -- | 1513.5102 | 1515.9668 | 1518.3001 |
| Frequencies -- | 1573.6390 | 1579.4216 | 1584.1667 |
| Frequencies -- | 1596.1461 | 1596.7268 | 1598.0479 |
| Frequencies -- | 1620.1563 | 1622.1770 | 3010.3486 |
| Frequencies -- | 3011.0131 | 3011.3674 | 3012.8579 |
| Frequencies -- | 3013.7086 | 3017.8384 | 3036.2990 |
| Frequencies -- | 3101.9987 | 3105.0754 | 3109.2507 |
| Frequencies -- | 3111.1067 | 3116.2428 | 3118.6724 |
| Frequencies -- | 3143.9353 | 3146.4648 | 3150.5660 |
| Frequencies -- | 3158.1679 | 3162.6919 | 3170.1130 |
| Frequencies -- | 3174.3760 | 3176.4972 | 3191.5379 |
| Frequencies -- | 3203.0408 | 3208.0592 | 3225.4710 |

### proximal conformation

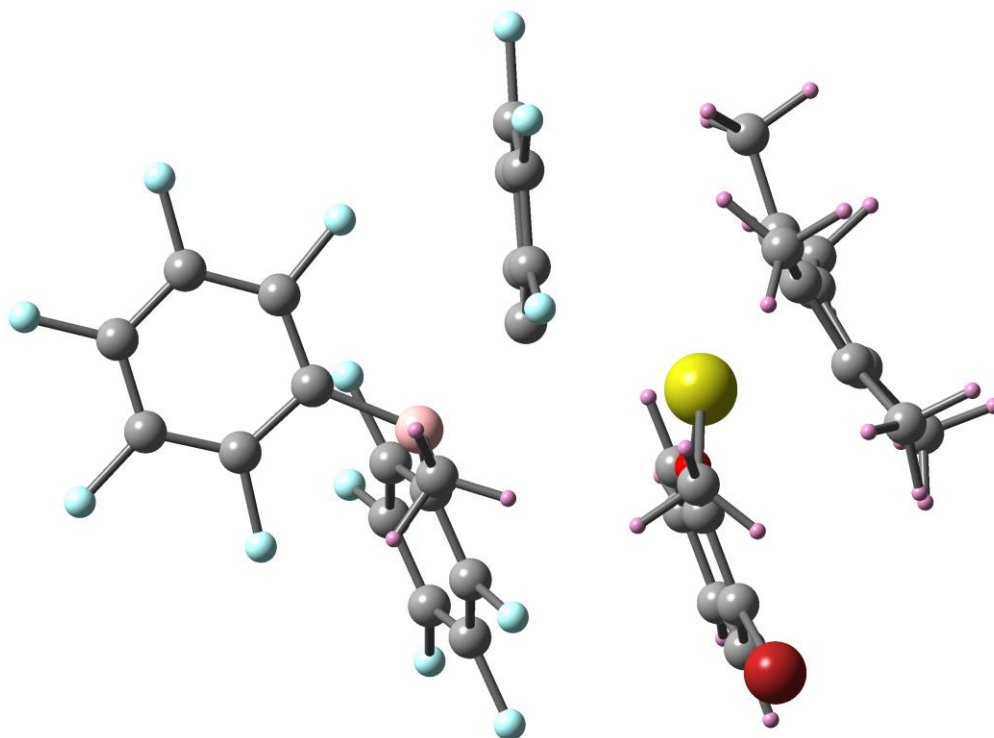

| vacuum        | toluene-like solvent | D3 dispersion |
|---------------|----------------------|---------------|
| -3054.8998125 | -3054.9102367        | -0.57243288   |

Imaginary frequency corresponding to vibration along the reaction coordinate:  $-230 \text{ cm}^{-1}$ .

|    |             |             |             |
|----|-------------|-------------|-------------|
| Ti | -1.91097200 | 1.29490300  | -0.46059800 |
| C  | -2.01520400 | 0.88973500  | -2.47803000 |
| H  | -1.40683900 | -0.02514400 | -2.52449500 |

|   |             |             |             |
|---|-------------|-------------|-------------|
| H | -3.00107500 | 0.67139200  | -2.90006100 |
| H | -1.53426800 | 1.70940400  | -3.03493400 |
| O | -2.35994300 | -0.31513000 | 0.17403900  |
| C | -2.89051300 | -1.37436100 | 0.88147200  |
| C | -2.53438700 | -1.53630000 | 2.24698500  |
| C | -3.75778500 | -2.32982300 | 0.28228600  |
| C | -3.02817100 | -2.61871500 | 2.99561000  |
| C | -4.25054300 | -3.41562200 | 1.03551500  |
| C | -3.88911100 | -3.56111200 | 2.39127500  |
| H | -2.73067500 | -2.73133300 | 4.03957200  |
| H | -4.90352400 | -4.14747700 | 0.56025800  |
| C | -2.30799400 | 3.57729400  | 0.54128200  |
| C | -2.59548800 | 3.69386900  | -0.86785900 |
| C | -3.19778500 | 2.58483400  | 1.10576000  |
| C | -3.70401200 | 2.81677700  | -1.17001000 |
| C | -4.07966600 | 2.13162000  | 0.05254500  |
| F | 7.74720500  | -0.75315200 | -0.57977600 |
| C | 6.36647800  | -0.63119500 | -0.63122400 |
| C | 5.72514200  | 0.50489000  | -0.11719000 |
| C | 5.57598000  | -1.64389300 | -1.19938300 |
| C | 4.31976400  | 0.60394700  | -0.18267400 |
| F | 6.47679300  | 1.52305200  | 0.45887900  |
| C | 4.17814900  | -1.49037400 | -1.23925100 |
| F | 6.17965400  | -2.78492900 | -1.71444700 |
| C | 3.46508300  | -0.36756100 | -0.73726900 |
| F | 3.79490000  | 1.77307100  | 0.38410300  |
| F | 3.48090000  | -2.56035000 | -1.82306400 |
| B | 1.81529300  | -0.39253100 | -1.01205400 |
| C | 0.78281900  | 1.31654800  | -0.11258900 |
| C | 1.16302100  | 2.54688400  | -0.71540500 |
| C | 0.83323300  | 1.37863400  | 1.30631700  |
| C | 1.65566400  | 3.66712200  | -0.02531300 |
| F | 1.05429000  | 2.70448700  | -2.10742400 |
| C | 1.33145100  | 2.45588100  | 2.05721600  |
| F | 0.32440000  | 0.30629600  | 2.06166600  |
| C | 1.76722100  | 3.60640700  | 1.37499200  |
| F | 2.00287700  | 4.84151500  | -0.68789100 |
| F | 1.35536900  | 2.43492000  | 3.44843300  |
| F | 2.22962700  | 4.69929100  | 2.08277700  |
| C | 1.17468000  | -1.70088800 | -0.26871900 |
| C | 0.25890200  | -2.58534300 | -0.88542200 |
| C | 1.63224800  | -2.15958800 | 0.99303800  |
| C | -0.16536500 | -3.80604400 | -0.32597900 |
| C | 1.22498700  | -3.36029800 | 1.60162700  |
| C | 0.31921100  | -4.19855000 | 0.93132800  |
| F | 2.55570300  | -1.40202800 | 1.72203200  |
| F | 1.70712300  | -3.72653800 | 2.85377900  |
| F | -0.10453400 | -5.38550800 | 1.51121900  |
| F | -1.06414400 | -4.62433500 | -1.00152200 |
| F | -0.28782500 | -2.28667800 | -2.13808000 |
| C | 1.61638300  | -0.17776000 | -2.59900300 |
| H | 0.59133200  | -0.00038200 | -2.92559800 |
| H | 2.23619000  | 0.65355000  | -2.96217900 |
| H | 1.96190300  | -1.08751100 | -3.11567000 |
| C | -1.48753600 | 4.54704800  | 1.35846200  |
| H | -2.16164700 | 5.34451200  | 1.71893600  |
| H | -1.03850600 | 4.09383200  | 2.24957400  |

|    |             |             |             |
|----|-------------|-------------|-------------|
| H  | -0.70103900 | 5.04109900  | 0.77955300  |
| C  | -1.97370000 | 4.67845900  | -1.83212100 |
| H  | -2.59499100 | 5.58947100  | -1.89207600 |
| H  | -0.96785200 | 4.99063100  | -1.52736900 |
| H  | -1.89937500 | 4.27356000  | -2.85049200 |
| C  | -3.32069500 | 2.26700200  | 2.57949500  |
| H  | -2.34421300 | 2.19967300  | 3.08032400  |
| H  | -3.88815000 | 3.06620500  | 3.08781800  |
| H  | -3.85430800 | 1.32651300  | 2.76014400  |
| C  | -4.50516400 | 2.83329300  | -2.44923100 |
| H  | -5.24751100 | 3.64954700  | -2.40292800 |
| H  | -3.88169600 | 3.01231000  | -3.33435000 |
| H  | -5.05930700 | 1.89961200  | -2.60974800 |
| C  | -5.31827200 | 1.28704000  | 0.23539900  |
| H  | -5.23314300 | 0.58917900  | 1.07657800  |
| H  | -6.17873200 | 1.94664700  | 0.44528800  |
| H  | -5.56561400 | 0.70176600  | -0.65795800 |
| H  | -1.85112300 | -0.81773000 | 2.69420400  |
| H  | -4.26926400 | -4.41075600 | 2.96031900  |
| Br | -4.28335100 | -2.19868300 | -1.59866600 |

|                |           |          |          |
|----------------|-----------|----------|----------|
| Frequencies -- | -229.6961 | 9.8480   | 13.8684  |
| Frequencies -- | 16.6797   | 27.1455  | 31.7061  |
| Frequencies -- | 33.7510   | 37.2446  | 39.3968  |
| Frequencies -- | 44.6303   | 47.9761  | 54.7046  |
| Frequencies -- | 58.1872   | 60.5036  | 63.0704  |
| Frequencies -- | 68.0229   | 88.6760  | 93.3890  |
| Frequencies -- | 104.6124  | 110.1399 | 115.5506 |
| Frequencies -- | 116.3500  | 120.6475 | 122.3451 |
| Frequencies -- | 125.7676  | 132.6149 | 135.6839 |
| Frequencies -- | 139.0820  | 143.3954 | 150.6090 |
| Frequencies -- | 151.4088  | 156.1430 | 157.3707 |
| Frequencies -- | 164.2892  | 164.8188 | 170.3722 |
| Frequencies -- | 171.5451  | 178.8045 | 185.5209 |
| Frequencies -- | 189.1885  | 192.2245 | 200.3567 |
| Frequencies -- | 205.0344  | 220.2179 | 222.1672 |
| Frequencies -- | 230.2687  | 236.0962 | 245.5839 |
| Frequencies -- | 263.0734  | 264.1709 | 265.7601 |
| Frequencies -- | 266.7901  | 271.4200 | 272.3827 |
| Frequencies -- | 275.6649  | 278.4581 | 280.8016 |
| Frequencies -- | 284.4262  | 288.1938 | 294.8323 |
| Frequencies -- | 298.1683  | 299.0827 | 300.2973 |
| Frequencies -- | 303.3867  | 307.1700 | 316.7246 |
| Frequencies -- | 317.9188  | 328.4177 | 328.9215 |
| Frequencies -- | 333.1635  | 345.8622 | 371.2437 |
| Frequencies -- | 374.9811  | 381.6630 | 383.6247 |
| Frequencies -- | 389.8809  | 407.2873 | 410.3092 |
| Frequencies -- | 422.1929  | 424.6336 | 431.0503 |
| Frequencies -- | 434.1353  | 440.9844 | 450.4585 |
| Frequencies -- | 450.5564  | 454.8587 | 485.4846 |
| Frequencies -- | 493.7296  | 511.8561 | 528.0697 |
| Frequencies -- | 535.1565  | 539.9900 | 542.0668 |
| Frequencies -- | 542.4697  | 551.4126 | 551.7383 |
| Frequencies -- | 571.3471  | 584.5965 | 592.3167 |
| Frequencies -- | 592.6785  | 604.3548 | 623.0319 |
| Frequencies -- | 628.4981  | 630.7945 | 637.1818 |
| Frequencies -- | 641.7244  | 643.8004 | 649.3082 |
| Frequencies -- | 669.1893  | 671.8752 | 690.2215 |
| Frequencies -- | 702.4019  | 709.3299 | 715.0108 |
| Frequencies -- | 716.7818  | 719.9215 | 737.5972 |



|                |           |           |           |
|----------------|-----------|-----------|-----------|
| Frequencies -- | 750.5535  | 768.0092  | 782.1794  |
| Frequencies -- | 799.8024  | 805.4945  | 830.7809  |
| Frequencies -- | 869.5814  | 888.7407  | 897.8463  |
| Frequencies -- | 908.0368  | 917.5826  | 924.3491  |
| Frequencies -- | 960.0074  | 965.8491  | 970.0084  |
| Frequencies -- | 985.3487  | 990.6641  | 994.8218  |
| Frequencies -- | 997.0924  | 1027.5656 | 1033.9966 |
| Frequencies -- | 1036.6404 | 1041.4590 | 1042.7508 |
| Frequencies -- | 1045.1754 | 1047.1891 | 1047.8092 |
| Frequencies -- | 1052.8374 | 1057.9388 | 1059.6076 |
| Frequencies -- | 1085.3320 | 1085.8923 | 1089.1885 |
| Frequencies -- | 1124.3412 | 1134.0546 | 1171.7676 |
| Frequencies -- | 1173.9114 | 1175.3239 | 1185.3820 |
| Frequencies -- | 1190.8211 | 1213.8280 | 1222.6057 |
| Frequencies -- | 1242.5657 | 1247.5154 | 1275.3049 |
| Frequencies -- | 1310.0985 | 1327.4373 | 1334.6368 |
| Frequencies -- | 1342.1253 | 1354.8163 | 1357.0555 |
| Frequencies -- | 1370.2146 | 1378.8754 | 1411.9895 |
| Frequencies -- | 1413.2746 | 1414.3251 | 1416.9549 |
| Frequencies -- | 1423.0196 | 1424.1882 | 1428.2345 |
| Frequencies -- | 1429.6120 | 1431.2437 | 1434.8542 |
| Frequencies -- | 1435.4071 | 1447.3697 | 1448.3753 |
| Frequencies -- | 1450.1611 | 1457.1984 | 1461.1865 |
| Frequencies -- | 1466.3942 | 1469.9408 | 1472.9114 |
| Frequencies -- | 1482.2831 | 1491.2572 | 1492.8604 |
| Frequencies -- | 1493.9026 | 1498.6836 | 1500.7252 |
| Frequencies -- | 1501.6541 | 1506.5796 | 1507.0000 |
| Frequencies -- | 1510.3815 | 1515.6273 | 1518.1707 |
| Frequencies -- | 1573.8333 | 1577.8620 | 1585.6343 |
| Frequencies -- | 1595.3977 | 1596.8807 | 1597.6894 |
| Frequencies -- | 1618.9858 | 1622.3670 | 3009.2539 |
| Frequencies -- | 3010.2978 | 3011.1190 | 3013.4527 |
| Frequencies -- | 3014.1097 | 3015.5062 | 3036.0904 |
| Frequencies -- | 3096.9776 | 3103.2883 | 3105.6993 |
| Frequencies -- | 3113.7796 | 3115.7154 | 3118.8799 |
| Frequencies -- | 3142.3961 | 3146.1436 | 3149.8596 |
| Frequencies -- | 3155.6669 | 3163.3124 | 3174.0285 |
| Frequencies -- | 3176.9196 | 3177.0074 | 3192.3443 |
| Frequencies -- | 3205.0451 | 3209.3313 | 3231.9412 |

**Catalyst 21:****distal conformation**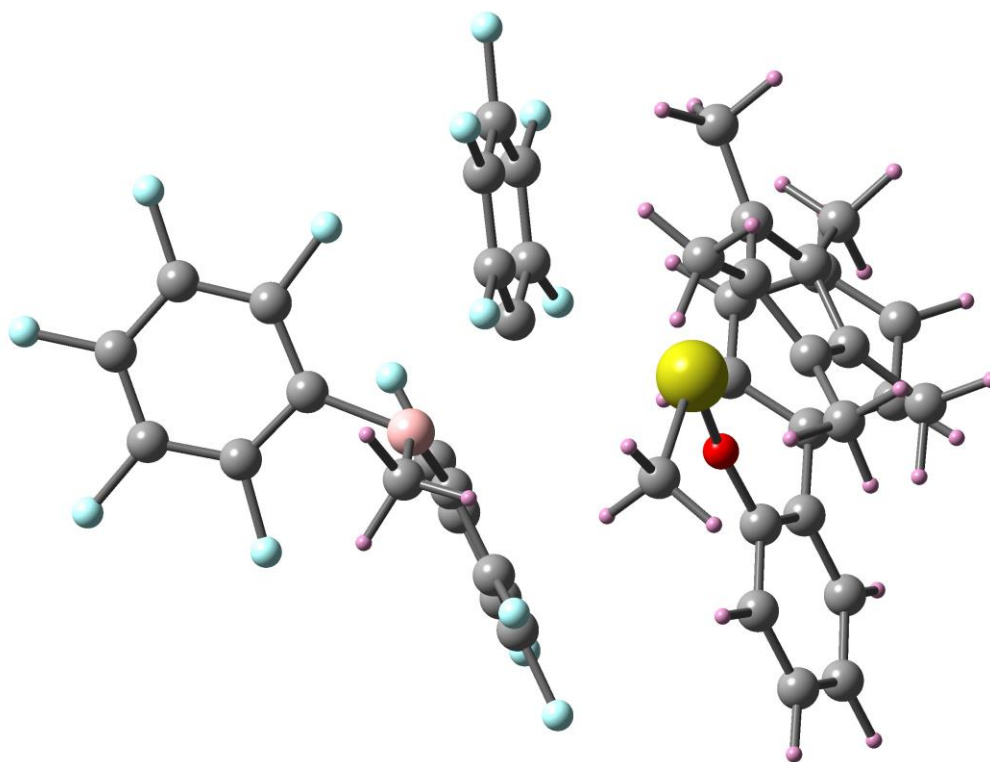

| vacuum        | toluene-like solvent | D3 dispersion |
|---------------|----------------------|---------------|
| -3273.2853126 | -3273.2962492        | -0.63909546   |

Imaginary frequency corresponding to vibration along the reaction coordinate:  $-240 \text{ cm}^{-1}$ .

|    |             |             |             |
|----|-------------|-------------|-------------|
| Ti | 1.87311500  | -1.20994900 | -0.95021800 |
| C  | 1.51660500  | -0.91551500 | -2.96992000 |
| H  | 0.82276500  | -0.06386800 | -2.94050500 |
| H  | 2.37753700  | -0.65454400 | -3.59596400 |
| H  | 1.01321000  | -1.80110400 | -3.38633800 |
| O  | 2.42588300  | 0.45716100  | -0.60826800 |
| C  | 3.12566600  | 1.65868900  | -0.75097000 |
| C  | 3.76831500  | 2.31872300  | 0.34427800  |
| C  | 3.19495300  | 2.19613400  | -2.06239200 |
| C  | 4.48778900  | 3.50868800  | 0.04044200  |
| C  | 3.90783700  | 3.37776400  | -2.32176200 |
| C  | 4.56692200  | 4.03644700  | -1.26163400 |
| H  | 4.96495700  | 4.04371400  | 0.86245500  |
| H  | 3.93457300  | 3.78351900  | -3.33471000 |
| C  | 2.50490400  | -3.49368500 | -0.05054300 |
| C  | 2.54485100  | -3.61751000 | -1.48416400 |
| C  | 3.44076800  | -2.45988000 | 0.34393500  |
| C  | 3.54246300  | -2.69585600 | -1.98225400 |
| C  | 4.10238700  | -1.98163100 | -0.85206000 |
| F  | -7.88309700 | 0.36968300  | 0.40969000  |

|   |             |             |             |
|---|-------------|-------------|-------------|
| C | -6.52922900 | 0.31798800  | 0.11243100  |
| C | -5.72738800 | -0.72762200 | 0.59281200  |
| C | -5.92924400 | 1.31097400  | -0.67992900 |
| C | -4.35364700 | -0.75903300 | 0.27465800  |
| F | -6.28966700 | -1.72404700 | 1.38267400  |
| C | -4.55442100 | 1.22882600  | -0.96605300 |
| F | -6.69564900 | 2.36053100  | -1.17241100 |
| C | -3.68624900 | 0.20078800  | -0.50976600 |
| F | -3.65412700 | -1.84112600 | 0.82272800  |
| F | -4.04772200 | 2.26691800  | -1.76506300 |
| B | -2.12577400 | 0.28073600  | -1.09075600 |
| C | -0.79398600 | -1.31590400 | -0.20273600 |
| C | -1.16999400 | -2.61475500 | -0.63358400 |
| C | -0.63436000 | -1.24186700 | 1.20493500  |
| C | -1.46643900 | -3.69294600 | 0.21714300  |
| F | -1.27392400 | -2.89381100 | -2.00850500 |
| C | -0.91583700 | -2.27629100 | 2.11412700  |
| F | -0.13889800 | -0.05755900 | 1.77640800  |
| C | -1.35693200 | -3.51211100 | 1.60737000  |
| F | -1.82749000 | -4.94306200 | -0.28185200 |
| F | -0.74058200 | -2.12042500 | 3.48646700  |
| F | -1.61819600 | -4.56313900 | 2.46722500  |
| C | -1.43315300 | 1.67856800  | -0.61090000 |
| C | -0.68974800 | 2.52354900  | -1.46814900 |
| C | -1.68744900 | 2.25789000  | 0.65926400  |
| C | -0.24291300 | 3.81390000  | -1.12396900 |
| C | -1.24132200 | 3.53065300  | 1.05982600  |
| C | -0.51426800 | 4.32310900  | 0.15563100  |
| F | -2.43566400 | 1.56038300  | 1.61236500  |
| F | -1.51835200 | 4.01501500  | 2.33290600  |
| F | -0.06677600 | 5.58278000  | 0.52290000  |
| F | 0.46151800  | 4.58908100  | -2.03844000 |
| F | -0.36024200 | 2.11235100  | -2.76604000 |
| C | -2.18526000 | -0.12495000 | -2.64770500 |
| H | -1.22183000 | -0.29583800 | -3.12956200 |
| H | -2.80060600 | -1.02341800 | -2.79244200 |
| H | -2.67709300 | 0.69586300  | -3.19566100 |
| C | 1.86225200  | -4.46719900 | 0.90936700  |
| H | 2.62039900  | -5.21709800 | 1.19718500  |
| H | 1.52285400  | -3.99673800 | 1.83944300  |
| H | 1.02598600  | -5.01890200 | 0.46817000  |
| C | 1.80861300  | -4.63882800 | -2.32035400 |
| H | 2.46238600  | -5.50811500 | -2.51136500 |
| H | 0.90318000  | -5.01360900 | -1.82899900 |
| H | 1.51193600  | -4.23985300 | -3.30001500 |
| C | 3.81011400  | -2.13041000 | 1.77142700  |
| H | 4.26762600  | -1.14187800 | 1.87096300  |
| H | 2.94518400  | -2.15975800 | 2.44867500  |
| H | 4.53809700  | -2.87191000 | 2.14619600  |
| C | 4.10223000  | -2.69338100 | -3.38410700 |
| H | 4.86884300  | -3.48372600 | -3.46969500 |
| H | 3.33908200  | -2.90027500 | -4.14509000 |
| H | 4.58878500  | -1.74311700 | -3.63973300 |
| C | 5.31655900  | -1.08428700 | -0.90266600 |
| H | 5.39680000  | -0.44502100 | -0.01711200 |
| H | 6.22880500  | -1.70476500 | -0.94514900 |
| H | 5.32540000  | -0.43234000 | -1.78632200 |

|   |            |            |             |
|---|------------|------------|-------------|
| H | 2.67548500 | 1.68567800 | -2.86868200 |
| H | 5.11698200 | 4.96184700 | -1.44082300 |
| C | 3.73058500 | 1.87209700 | 1.77406500  |
| C | 2.50701800 | 1.61831200 | 2.44489400  |
| C | 4.93588500 | 1.79063100 | 2.52526900  |
| C | 2.48528300 | 1.29323400 | 3.81716200  |
| H | 1.56909800 | 1.69866900 | 1.90246200  |
| C | 4.91753400 | 1.46098500 | 3.89650200  |
| H | 5.89225600 | 1.97956500 | 2.03282000  |
| C | 3.68974300 | 1.21235400 | 4.54997000  |
| H | 1.52750400 | 1.11472100 | 4.31015700  |
| H | 5.85671100 | 1.40271400 | 4.45172900  |
| H | 3.67154600 | 0.96549800 | 5.61383300  |

|                |           |          |          |
|----------------|-----------|----------|----------|
| Frequencies -- | -240.3196 | 8.0306   | 12.4892  |
| Frequencies -- | 23.5079   | 24.5708  | 28.7365  |
| Frequencies -- | 31.4891   | 35.2706  | 37.3561  |
| Frequencies -- | 39.8990   | 43.8227  | 49.4670  |
| Frequencies -- | 52.4551   | 57.3918  | 58.9423  |
| Frequencies -- | 64.6134   | 75.7637  | 78.3592  |
| Frequencies -- | 88.1733   | 93.0158  | 95.5314  |
| Frequencies -- | 110.7040  | 112.8336 | 114.5441 |
| Frequencies -- | 120.8580  | 122.3931 | 125.9714 |
| Frequencies -- | 127.1892  | 134.1883 | 141.7123 |
| Frequencies -- | 143.4149  | 147.8719 | 149.5659 |
| Frequencies -- | 154.8881  | 157.5079 | 161.5032 |
| Frequencies -- | 162.1357  | 165.0088 | 172.7245 |
| Frequencies -- | 179.7017  | 190.6954 | 191.1781 |
| Frequencies -- | 194.5474  | 204.4696 | 207.3463 |
| Frequencies -- | 220.3870  | 230.3429 | 231.2003 |
| Frequencies -- | 246.0324  | 260.4558 | 263.7682 |
| Frequencies -- | 265.1879  | 266.5423 | 268.6160 |
| Frequencies -- | 272.0114  | 275.0471 | 276.4751 |
| Frequencies -- | 282.6087  | 287.9898 | 290.7444 |
| Frequencies -- | 294.5538  | 296.6975 | 299.4458 |
| Frequencies -- | 300.2320  | 302.8153 | 303.6708 |
| Frequencies -- | 306.5925  | 310.4871 | 316.8099 |
| Frequencies -- | 320.4224  | 329.9129 | 332.9751 |
| Frequencies -- | 334.2519  | 354.3015 | 369.1513 |
| Frequencies -- | 376.0944  | 380.4327 | 380.8153 |
| Frequencies -- | 389.2709  | 406.4868 | 408.6536 |
| Frequencies -- | 409.4644  | 423.0879 | 425.4907 |
| Frequencies -- | 431.0631  | 433.3742 | 439.2158 |
| Frequencies -- | 450.0425  | 454.5372 | 474.3541 |
| Frequencies -- | 484.3845  | 502.4499 | 508.8981 |
| Frequencies -- | 527.8600  | 535.8363 | 539.4106 |
| Frequencies -- | 540.2320  | 542.9316 | 550.9603 |
| Frequencies -- | 552.3347  | 562.0923 | 566.9504 |
| Frequencies -- | 580.1652  | 587.5493 | 593.3361 |
| Frequencies -- | 603.0030  | 613.7619 | 614.2205 |
| Frequencies -- | 621.4067  | 629.2045 | 637.6462 |
| Frequencies -- | 642.3677  | 643.8751 | 645.3237 |
| Frequencies -- | 649.2949  | 669.3316 | 688.1536 |
| Frequencies -- | 691.7762  | 711.1522 | 711.6360 |
| Frequencies -- | 717.3920  | 719.6851 | 736.6278 |
| Frequencies -- | 739.0003  | 742.5580 | 751.1970 |
| Frequencies -- | 768.2059  | 781.8324 | 783.0919 |
| Frequencies -- | 800.6313  | 807.1765 | 835.1082 |
| Frequencies -- | 864.3260  | 880.0437 | 888.3463 |
| Frequencies -- | 897.0978  | 908.1005 | 910.9804 |
| Frequencies -- | 916.7949  | 935.6183 | 966.4860 |

|                |           |           |           |
|----------------|-----------|-----------|-----------|
| Frequencies -- | 967.4209  | 971.2983  | 984.2222  |
| Frequencies -- | 989.4376  | 991.7746  | 995.3270  |
| Frequencies -- | 998.9214  | 1001.1414 | 1009.7537 |
| Frequencies -- | 1032.4699 | 1037.5114 | 1038.0900 |
| Frequencies -- | 1041.0898 | 1043.4336 | 1044.5941 |
| Frequencies -- | 1047.1902 | 1047.4649 | 1047.7735 |
| Frequencies -- | 1058.3406 | 1061.1959 | 1065.2385 |
| Frequencies -- | 1087.6932 | 1088.2353 | 1090.6883 |
| Frequencies -- | 1092.8734 | 1124.8422 | 1125.3114 |
| Frequencies -- | 1171.3783 | 1172.2578 | 1175.2124 |
| Frequencies -- | 1185.2673 | 1186.0726 | 1189.2669 |
| Frequencies -- | 1203.0299 | 1211.4784 | 1215.5808 |
| Frequencies -- | 1224.9662 | 1245.5026 | 1266.1951 |
| Frequencies -- | 1296.9517 | 1312.5390 | 1327.7616 |
| Frequencies -- | 1338.8745 | 1339.9079 | 1342.1326 |
| Frequencies -- | 1356.4814 | 1357.8890 | 1370.7104 |
| Frequencies -- | 1372.0467 | 1377.3429 | 1411.1292 |
| Frequencies -- | 1414.7638 | 1415.9602 | 1422.4405 |
| Frequencies -- | 1424.1191 | 1426.9233 | 1429.0896 |
| Frequencies -- | 1431.2707 | 1433.0439 | 1434.0741 |
| Frequencies -- | 1438.6829 | 1446.1532 | 1449.9915 |
| Frequencies -- | 1452.6570 | 1455.7371 | 1458.7960 |
| Frequencies -- | 1462.8471 | 1470.2696 | 1473.0976 |
| Frequencies -- | 1480.2775 | 1482.2946 | 1491.9382 |
| Frequencies -- | 1493.7654 | 1494.7703 | 1499.9955 |
| Frequencies -- | 1501.5285 | 1504.9899 | 1506.8332 |
| Frequencies -- | 1507.8173 | 1508.2291 | 1509.5560 |
| Frequencies -- | 1518.1561 | 1520.4400 | 1575.1844 |
| Frequencies -- | 1577.4182 | 1584.3754 | 1595.5665 |
| Frequencies -- | 1596.3975 | 1597.5260 | 1612.0397 |
| Frequencies -- | 1618.4527 | 1622.7147 | 1623.1566 |
| Frequencies -- | 3009.2761 | 3010.0178 | 3010.9643 |
| Frequencies -- | 3014.4033 | 3015.3915 | 3018.4328 |
| Frequencies -- | 3031.3220 | 3102.2402 | 3103.4045 |
| Frequencies -- | 3104.5186 | 3109.8028 | 3115.1410 |
| Frequencies -- | 3117.6888 | 3145.1660 | 3147.0975 |
| Frequencies -- | 3154.9278 | 3156.8053 | 3163.5205 |
| Frequencies -- | 3164.5247 | 3167.1544 | 3170.1248 |
| Frequencies -- | 3172.6394 | 3176.3081 | 3179.2145 |
| Frequencies -- | 3183.4638 | 3193.1903 | 3200.0563 |
| Frequencies -- | 3202.3733 | 3242.3815 | 3242.9348 |

**proximal conformation**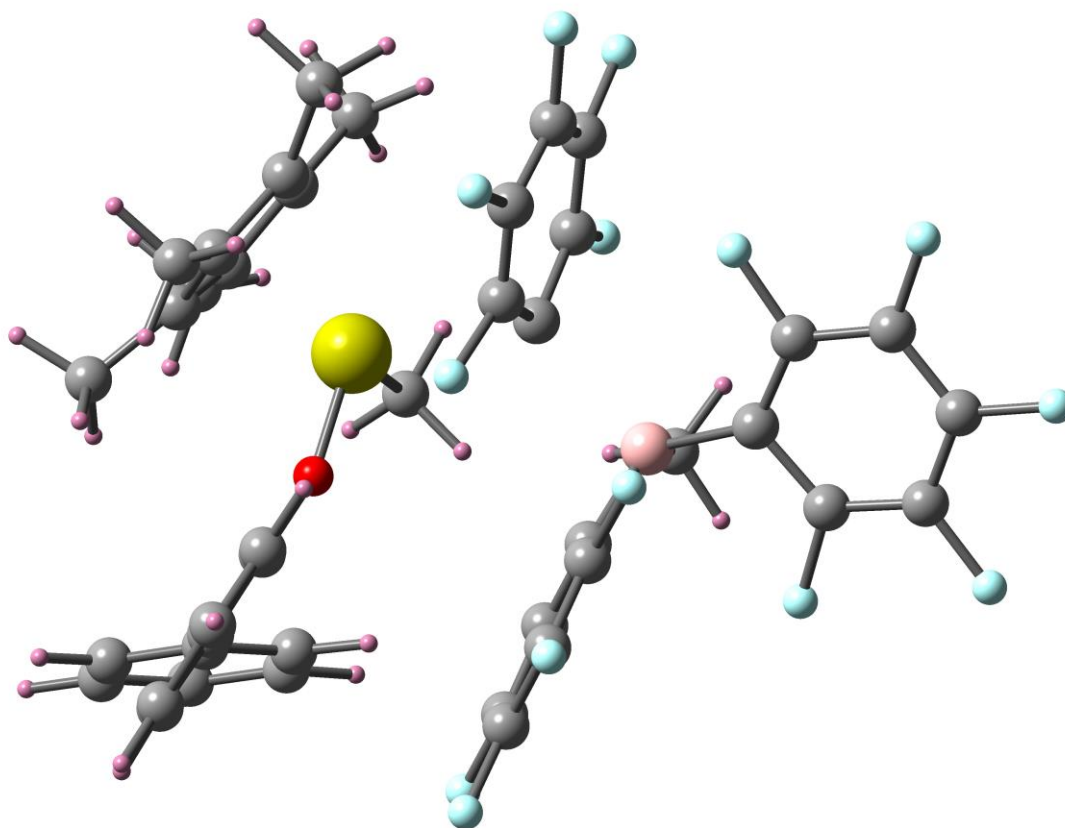

| <b>vacuum</b> | <b>toluene-like solvent</b> | <b>D3 dispersion</b> |
|---------------|-----------------------------|----------------------|
| -3273.2886275 | -3273.2994946               | -0.64076409          |

Imaginary frequency corresponding to vibration along the reaction coordinate:  $-236\text{ cm}^{-1}$ .

|    |             |             |             |
|----|-------------|-------------|-------------|
| Ti | -1.76387000 | 1.40844900  | -0.30954700 |
| C  | -1.97372400 | 1.07820300  | -2.33442000 |
| H  | -1.33765600 | 0.18608300  | -2.44276700 |
| H  | -2.98319400 | 0.82843300  | -2.67852700 |
| H  | -1.56433200 | 1.91398800  | -2.91993400 |
| O  | -2.29972200 | -0.18274900 | 0.29488700  |
| C  | -2.83916100 | -1.18995000 | 1.09578800  |
| C  | -2.25734400 | -1.36353200 | 2.37809600  |
| C  | -3.92918200 | -2.01134700 | 0.66485500  |
| C  | -2.74085700 | -2.34474500 | 3.26001700  |
| C  | -4.39624400 | -2.98605700 | 1.59012600  |
| C  | -3.82268200 | -3.16068400 | 2.86365700  |
| H  | -2.27136100 | -2.47496500 | 4.23694000  |
| H  | -5.21015500 | -3.64150000 | 1.27763100  |
| C  | -1.90534100 | 3.75422000  | 0.63680400  |
| C  | -2.38971000 | 3.83249500  | -0.71835700 |
| C  | -2.74221600 | 2.82361000  | 1.36656900  |

|   |             |             |             |
|---|-------------|-------------|-------------|
| C | -3.56145200 | 2.99279300  | -0.82191700 |
| C | -3.78706600 | 2.37695900  | 0.47339100  |
| F | 7.83083900  | -1.18629800 | -0.94389600 |
| C | 6.45666000  | -1.00008300 | -0.91311700 |
| C | 5.90331400  | 0.19195500  | -0.42390500 |
| C | 5.58531300  | -2.00160500 | -1.37278500 |
| C | 4.50267400  | 0.35693300  | -0.40581700 |
| F | 6.73697900  | 1.20104000  | 0.04484200  |
| C | 4.19648200  | -1.78162400 | -1.33252900 |
| F | 6.10102700  | -3.19586800 | -1.86200000 |
| C | 3.57091700  | -0.60001300 | -0.85028400 |
| F | 4.06870900  | 1.57833900  | 0.12426400  |
| F | 3.41236400  | -2.84308300 | -1.81323400 |
| B | 1.91096600  | -0.55521100 | -1.02427300 |
| C | 0.99744300  | 1.27780000  | -0.14952700 |
| C | 1.39535100  | 2.44838100  | -0.84919300 |
| C | 1.16144900  | 1.41053600  | 1.25352300  |
| C | 1.99824300  | 3.57378600  | -0.26225700 |
| F | 1.19760600  | 2.53614100  | -2.23862000 |
| C | 1.77296800  | 2.49454100  | 1.90420500  |
| F | 0.65887400  | 0.40503100  | 2.10282000  |
| C | 2.21429600  | 3.58096900  | 1.12705700  |
| F | 2.35492400  | 4.69069300  | -1.01437400 |
| F | 1.90596700  | 2.54453200  | 3.28920300  |
| F | 2.78694000  | 4.68222800  | 1.73543200  |
| C | 1.24512900  | -1.77725500 | -0.17111100 |
| C | 0.23454900  | -2.62503400 | -0.67813900 |
| C | 1.75452000  | -2.20335000 | 1.08225100  |
| C | -0.23628100 | -3.78153100 | -0.02866500 |
| C | 1.30916400  | -3.34207000 | 1.77759300  |
| C | 0.30473700  | -4.14599400 | 1.21372700  |
| F | 2.77137700  | -1.47689100 | 1.70967600  |
| F | 1.84869800  | -3.68034500 | 3.01368700  |
| F | -0.15887600 | -5.26775900 | 1.88379300  |
| F | -1.23920800 | -4.55832300 | -0.60044300 |
| F | -0.37202900 | -2.34925900 | -1.91141500 |
| C | 1.61592100  | -0.39743700 | -2.60039400 |
| H | 0.57770100  | -0.19503800 | -2.86685400 |
| H | 2.23863500  | 0.39492700  | -3.03742200 |
| H | 1.89565000  | -1.34019100 | -3.09805400 |
| C | -0.95005900 | 4.73022400  | 1.28283800  |
| H | -1.54399600 | 5.57650600  | 1.67245300  |
| H | -0.41165100 | 4.30977600  | 2.13891700  |
| H | -0.22430900 | 5.15531800  | 0.58171900  |
| C | -1.85959000 | 4.75052000  | -1.79601300 |
| H | -2.34666000 | 5.73903900  | -1.72291300 |
| H | -0.77762900 | 4.91598700  | -1.71334300 |
| H | -2.06060200 | 4.36706200  | -2.80467000 |
| C | -2.65940000 | 2.55911400  | 2.85392500  |
| H | -3.13249800 | 1.61116400  | 3.13697700  |
| H | -1.62315500 | 2.53685600  | 3.22020200  |
| H | -3.17911300 | 3.36098200  | 3.40750100  |
| C | -4.53207000 | 2.97593500  | -1.97838800 |
| H | -5.25262000 | 3.80477700  | -1.86176600 |
| H | -4.03499100 | 3.11271300  | -2.94688800 |
| H | -5.11179400 | 2.04519100  | -2.02496400 |
| C | -5.02858800 | 1.61854000  | 0.87540700  |

|   |             |             |             |
|---|-------------|-------------|-------------|
| H | -4.85732700 | 0.95602700  | 1.73158900  |
| H | -5.81039100 | 2.34026800  | 1.17145500  |
| H | -5.43519700 | 1.01262000  | 0.05860900  |
| H | -1.42082200 | -0.73073700 | 2.66364300  |
| H | -4.20369100 | -3.93641800 | 3.52999800  |
| C | -4.61592100 | -1.92286600 | -0.66627500 |
| C | -6.03426900 | -1.82485600 | -0.71893500 |
| C | -3.90855200 | -2.02805200 | -1.89157700 |
| C | -6.72102300 | -1.81978400 | -1.95072200 |
| H | -6.60170700 | -1.74265800 | 0.21061300  |
| C | -4.59466100 | -2.03258200 | -3.12439700 |
| H | -2.82811400 | -2.14134500 | -1.88414400 |
| C | -6.00211000 | -1.92494800 | -3.16231500 |
| H | -7.81067700 | -1.74023000 | -1.96307500 |
| H | -4.02731800 | -2.13373500 | -4.05258100 |
| H | -6.53042100 | -1.93303700 | -4.11839300 |

|                |           |          |          |
|----------------|-----------|----------|----------|
| Frequencies -- | -235.9041 | 8.1831   | 16.1379  |
| Frequencies -- | 18.8376   | 26.5287  | 29.0291  |
| Frequencies -- | 32.0492   | 34.2647  | 36.9672  |
| Frequencies -- | 38.6587   | 43.0194  | 49.7586  |
| Frequencies -- | 51.6246   | 56.8355  | 60.8996  |
| Frequencies -- | 63.4621   | 65.5831  | 85.5412  |
| Frequencies -- | 90.7143   | 94.4617  | 100.9207 |
| Frequencies -- | 110.3627  | 114.5477 | 120.7419 |
| Frequencies -- | 121.1937  | 124.0284 | 125.6755 |
| Frequencies -- | 131.5544  | 134.2817 | 140.4883 |
| Frequencies -- | 143.2311  | 151.2527 | 152.3515 |
| Frequencies -- | 156.3029  | 157.5960 | 160.9445 |
| Frequencies -- | 164.9713  | 169.4361 | 175.6295 |
| Frequencies -- | 179.7137  | 189.4159 | 193.9113 |
| Frequencies -- | 198.9656  | 204.7387 | 211.1271 |
| Frequencies -- | 217.3868  | 220.1673 | 235.5659 |
| Frequencies -- | 240.3521  | 253.0097 | 263.4558 |
| Frequencies -- | 264.7817  | 265.8491 | 266.7520 |
| Frequencies -- | 269.8683  | 273.9630 | 277.2358 |
| Frequencies -- | 279.2265  | 283.4453 | 287.4256 |
| Frequencies -- | 290.9699  | 295.5998 | 297.4843 |
| Frequencies -- | 300.0578  | 302.2734 | 304.3234 |
| Frequencies -- | 305.8080  | 306.2661 | 316.7456 |
| Frequencies -- | 317.3563  | 328.1903 | 333.2414 |
| Frequencies -- | 334.3383  | 348.4371 | 370.2641 |
| Frequencies -- | 374.8823  | 381.5240 | 382.1943 |
| Frequencies -- | 392.1474  | 404.2514 | 409.6850 |
| Frequencies -- | 410.1619  | 422.2970 | 424.7709 |
| Frequencies -- | 430.8810  | 433.7705 | 440.1309 |
| Frequencies -- | 450.5486  | 454.9063 | 472.3984 |
| Frequencies -- | 484.9233  | 508.2354 | 512.7521 |
| Frequencies -- | 529.8107  | 535.6800 | 539.7978 |
| Frequencies -- | 542.0078  | 543.2172 | 551.2129 |
| Frequencies -- | 554.0126  | 563.3612 | 571.2129 |
| Frequencies -- | 580.8880  | 590.2839 | 593.4584 |
| Frequencies -- | 604.2454  | 612.7140 | 615.4292 |
| Frequencies -- | 622.0360  | 628.4233 | 637.6917 |
| Frequencies -- | 641.4755  | 643.3669 | 646.7221 |
| Frequencies -- | 648.0509  | 671.1143 | 688.6017 |
| Frequencies -- | 690.5194  | 712.4812 | 714.3266 |
| Frequencies -- | 716.9324  | 719.8305 | 737.3609 |
| Frequencies -- | 738.1546  | 741.9551 | 750.6195 |
| Frequencies -- | 768.7017  | 782.6647 | 783.5714 |
| Frequencies -- | 803.2753  | 806.6023 | 832.6426 |



|                |           |           |           |
|----------------|-----------|-----------|-----------|
| Frequencies -- | 866.8221  | 882.8204  | 887.0304  |
| Frequencies -- | 897.6965  | 907.8224  | 916.2800  |
| Frequencies -- | 917.2406  | 940.0265  | 967.5477  |
| Frequencies -- | 968.6709  | 974.2119  | 983.7898  |
| Frequencies -- | 990.5447  | 992.4596  | 996.7051  |
| Frequencies -- | 997.9007  | 1000.9943 | 1009.7183 |
| Frequencies -- | 1031.2608 | 1037.5970 | 1038.5393 |
| Frequencies -- | 1042.2527 | 1043.2668 | 1045.1404 |
| Frequencies -- | 1047.0657 | 1047.5175 | 1048.4994 |
| Frequencies -- | 1057.2329 | 1060.0420 | 1063.3283 |
| Frequencies -- | 1088.8789 | 1089.2030 | 1089.8668 |
| Frequencies -- | 1092.4672 | 1125.8097 | 1127.1835 |
| Frequencies -- | 1172.1552 | 1172.4123 | 1176.0722 |
| Frequencies -- | 1183.8784 | 1186.9568 | 1187.5788 |
| Frequencies -- | 1209.1907 | 1211.0393 | 1214.4673 |
| Frequencies -- | 1223.5943 | 1243.2417 | 1264.9828 |
| Frequencies -- | 1295.8362 | 1311.4000 | 1328.0652 |
| Frequencies -- | 1337.6533 | 1338.0237 | 1343.6572 |
| Frequencies -- | 1354.7050 | 1357.8716 | 1370.1047 |
| Frequencies -- | 1371.2471 | 1378.1354 | 1412.8133 |
| Frequencies -- | 1414.7285 | 1415.4025 | 1421.5352 |
| Frequencies -- | 1423.3599 | 1426.0550 | 1428.5178 |
| Frequencies -- | 1430.4157 | 1430.9113 | 1432.9900 |
| Frequencies -- | 1434.7078 | 1444.6838 | 1446.6707 |
| Frequencies -- | 1450.7182 | 1451.8481 | 1456.0019 |
| Frequencies -- | 1463.4470 | 1470.7517 | 1473.0159 |
| Frequencies -- | 1480.0910 | 1483.1339 | 1493.5276 |
| Frequencies -- | 1494.6686 | 1496.1671 | 1498.7022 |
| Frequencies -- | 1500.9044 | 1503.8155 | 1508.0575 |
| Frequencies -- | 1508.7268 | 1509.0498 | 1512.5250 |
| Frequencies -- | 1517.8700 | 1521.2853 | 1574.1995 |
| Frequencies -- | 1577.5735 | 1585.5001 | 1595.2858 |
| Frequencies -- | 1597.0964 | 1597.9377 | 1611.5543 |
| Frequencies -- | 1619.5774 | 1622.4588 | 1623.5732 |
| Frequencies -- | 3007.8162 | 3009.7052 | 3010.6597 |
| Frequencies -- | 3012.5386 | 3013.2534 | 3015.9145 |
| Frequencies -- | 3034.3912 | 3098.1154 | 3105.2672 |
| Frequencies -- | 3106.9766 | 3116.3114 | 3118.1675 |
| Frequencies -- | 3119.8233 | 3139.8740 | 3146.9975 |
| Frequencies -- | 3147.9006 | 3152.3781 | 3153.4808 |
| Frequencies -- | 3162.7886 | 3168.7985 | 3170.5292 |
| Frequencies -- | 3171.7901 | 3174.5565 | 3175.1332 |
| Frequencies -- | 3183.1313 | 3190.4614 | 3200.0969 |
| Frequencies -- | 3201.7633 | 3239.0916 | 3249.1629 |

**Catalyst 22:**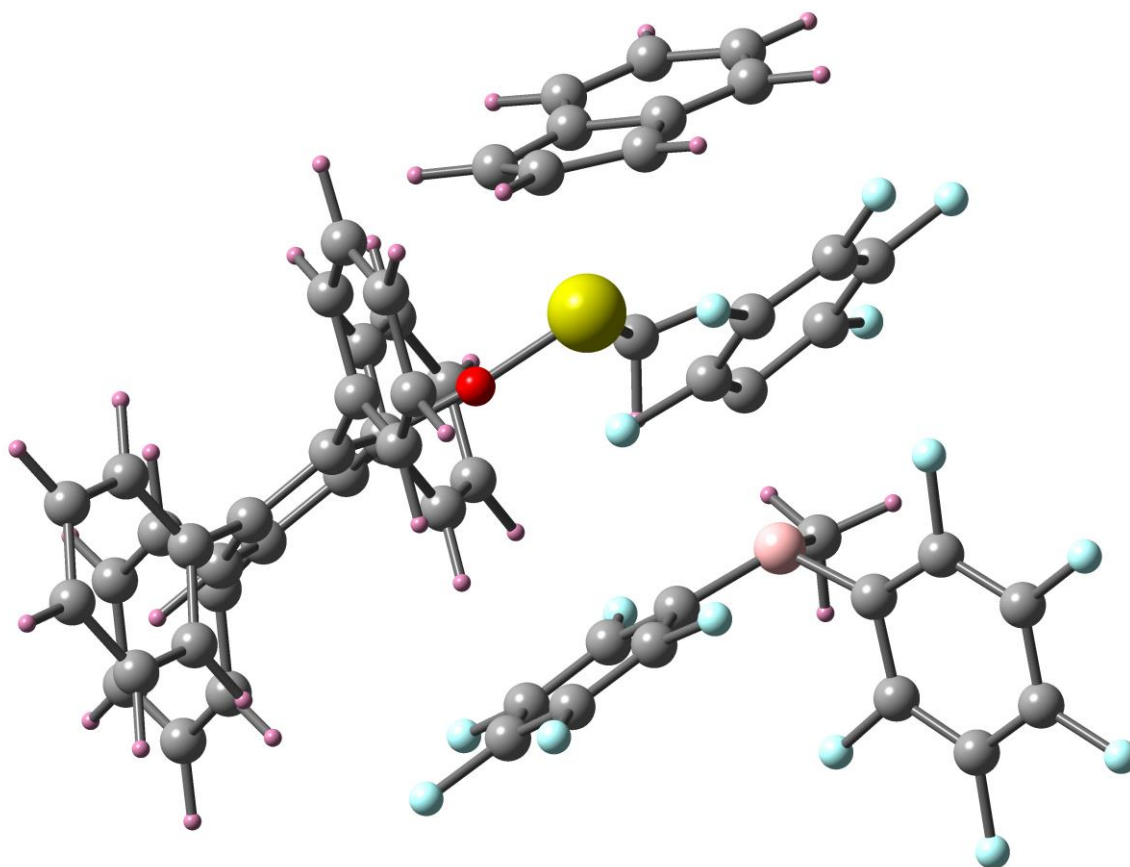

| vacuum       | toluene-like solvent | D3 dispersion |
|--------------|----------------------|---------------|
| -3923.215211 | -3923.2300953        | -0.84743460   |

Imaginary frequency corresponding to vibration along the reaction coordinate:  $-229 \text{ cm}^{-1}$ .

|    |             |             |             |
|----|-------------|-------------|-------------|
| Ti | 0.08926600  | 2.20969700  | 0.26826000  |
| C  | 0.06351600  | 2.89763000  | -1.65898100 |
| H  | -0.00685100 | 1.97268000  | -2.24801000 |
| H  | -0.78954900 | 3.54045000  | -1.89317100 |
| H  | 1.00739100  | 3.42645300  | -1.85649200 |
| O  | -1.35528900 | 1.16918500  | 0.30797600  |
| C  | -2.56122800 | 0.46008100  | 0.38056400  |
| C  | -2.81651500 | -0.38527900 | 1.51143700  |
| C  | -3.46572800 | 0.54882900  | -0.72906300 |
| C  | -3.90645800 | -1.30353000 | 1.42247200  |
| C  | -4.54922700 | -0.37609600 | -0.78405500 |
| C  | -4.71079300 | -1.31078900 | 0.26167900  |
| C  | 1.30642200  | 3.69617700  | 1.96506500  |
| C  | 1.12230900  | 4.72562200  | 0.96593700  |
| C  | 0.02575900  | 3.21189200  | 2.36164300  |
| C  | -0.30486100 | 4.82666200  | 0.70411300  |
| C  | -0.97409900 | 3.82469000  | 1.52183900  |
| F  | 7.55438000  | -3.80318100 | -2.06317200 |
| C  | 6.40686400  | -3.05167300 | -1.85859500 |

|   |             |             |             |
|---|-------------|-------------|-------------|
| C | 6.36385200  | -2.06121400 | -0.86638400 |
| C | 5.25906600  | -3.26607300 | -2.63993500 |
| C | 5.18529400  | -1.30923200 | -0.67902000 |
| F | 7.47939800  | -1.83144600 | -0.06964100 |
| C | 4.11227700  | -2.48440600 | -2.41091300 |
| F | 5.26644900  | -4.24399100 | -3.62733600 |
| C | 4.00353200  | -1.46357000 | -1.42839800 |
| F | 5.25238900  | -0.37097500 | 0.35814600  |
| F | 3.01464100  | -2.77836500 | -3.23732600 |
| B | 2.56954200  | -0.61388700 | -1.44991600 |
| C | 2.43438300  | 0.92075300  | 0.17587800  |
| C | 3.42049000  | 1.93323800  | 0.01304900  |
| C | 2.43084100  | 0.38251100  | 1.48998500  |
| C | 4.35252800  | 2.31524800  | 0.99311900  |
| F | 3.50978800  | 2.63729800  | -1.19607500 |
| C | 3.34087400  | 0.70526900  | 2.51142900  |
| F | 1.42241800  | -0.52732500 | 1.83742200  |
| C | 4.32255200  | 1.67939000  | 2.24861200  |
| F | 5.28677100  | 3.32101500  | 0.75965800  |
| F | 3.28002400  | 0.11340600  | 3.76772400  |
| F | 5.22672300  | 2.03793100  | 3.23059700  |
| C | 1.33167400  | -1.62848400 | -1.12592700 |
| C | 0.12540600  | -1.65055600 | -1.86361700 |
| C | 1.43858100  | -2.69427400 | -0.19578900 |
| C | -0.87765800 | -2.62712600 | -1.71665800 |
| C | 0.45494800  | -3.67986300 | 0.00368800  |
| C | -0.71546100 | -3.65140100 | -0.77216500 |
| F | 2.57809300  | -2.81581000 | 0.60356200  |
| F | 0.62419800  | -4.67593700 | 0.95885000  |
| F | -1.70569800 | -4.60836100 | -0.59241800 |
| F | -2.03071200 | -2.58426200 | -2.49692000 |
| F | -0.14125900 | -0.66885400 | -2.82467100 |
| C | 2.56789900  | 0.28283700  | -2.78642900 |
| H | 1.76743400  | 1.02003000  | -2.85114400 |
| H | 3.52508800  | 0.80776600  | -2.90777100 |
| H | 2.45759900  | -0.38959700 | -3.65284600 |
| H | -5.53826200 | -2.01690600 | 0.20593000  |
| C | -4.27235300 | -2.27581700 | 2.51652800  |
| C | -4.13570300 | -3.67055000 | 2.29329400  |
| C | -4.83089400 | -1.84129200 | 3.74548100  |
| C | -4.52968000 | -4.60329300 | 3.27653900  |
| H | -3.71128500 | -4.02893300 | 1.35363200  |
| C | -5.23125300 | -2.77216700 | 4.72698800  |
| H | -4.96166700 | -0.77486800 | 3.93400500  |
| C | -5.07874900 | -4.15764000 | 4.49863400  |
| H | -4.40592800 | -5.67210700 | 3.08703100  |
| H | -5.66237300 | -2.41557100 | 5.66555400  |
| H | -5.38562900 | -4.87844400 | 5.26005900  |
| C | -5.55433400 | -0.41890700 | -1.90787800 |
| C | -6.53892600 | 0.58865600  | -2.06855300 |
| C | -5.57790700 | -1.53312500 | -2.78593100 |
| C | -7.51461900 | 0.48995800  | -3.08311300 |
| H | -6.54943500 | 1.44737900  | -1.39549100 |
| C | -6.54868400 | -1.63032900 | -3.80557300 |
| H | -4.82764500 | -2.31845800 | -2.67885200 |
| C | -7.52182800 | -0.61860200 | -3.95826200 |
| H | -8.26747300 | 1.27510700  | -3.18685300 |

|   |             |             |             |
|---|-------------|-------------|-------------|
| H | -6.54342300 | -2.49273300 | -4.47638300 |
| H | -8.27624400 | -0.69393600 | -4.74489900 |
| C | -2.03627000 | -0.29770300 | 2.79704400  |
| C | -1.18805200 | -1.34382100 | 3.23481100  |
| C | -2.25525100 | 0.79870700  | 3.67195400  |
| C | -0.56702300 | -1.29334300 | 4.49932200  |
| H | -1.01391100 | -2.20445000 | 2.58963700  |
| C | -1.64520100 | 0.84838000  | 4.94371500  |
| H | -2.93695500 | 1.59801000  | 3.37193800  |
| C | -0.79351400 | -0.19838700 | 5.36094800  |
| H | 0.09112700  | -2.10759400 | 4.80896300  |
| H | -1.84355700 | 1.69308500  | 5.60811900  |
| H | -0.31916100 | -0.16442700 | 6.34411600  |
| C | -3.34819000 | 1.60762900  | -1.79376600 |
| C | -3.74202300 | 2.93888600  | -1.49988100 |
| C | -2.97304100 | 1.29485000  | -3.12361100 |
| C | -3.76770700 | 3.92788700  | -2.50582300 |
| H | -4.06450800 | 3.19350500  | -0.48712200 |
| C | -2.98830300 | 2.28350500  | -4.12921500 |
| H | -2.67433300 | 0.27810100  | -3.37507500 |
| C | -3.38953400 | 3.60306400  | -3.82722100 |
| H | -4.09789900 | 4.94123500  | -2.26330700 |
| H | -2.69491900 | 2.01972300  | -5.14771200 |
| H | -3.41383600 | 4.36406300  | -4.61045000 |
| H | 2.24537300  | 3.43306700  | 2.43247800  |
| H | -0.16286100 | 2.49669300  | 3.15362500  |
| H | -2.04786400 | 3.71376100  | 1.63058500  |
| C | 2.04101800  | 5.59232200  | 0.30251700  |
| H | 3.11350600  | 5.51689400  | 0.48589500  |
| C | 1.53236300  | 6.56127600  | -0.56678000 |
| H | 2.21397200  | 7.24941300  | -1.07108700 |
| C | 0.12160400  | 6.67880400  | -0.80535700 |
| H | -0.23564700 | 7.46089300  | -1.47898300 |
| C | -0.79522700 | 5.82114700  | -0.19060700 |
| H | -1.86451200 | 5.91795100  | -0.38217500 |

|                |           |          |          |
|----------------|-----------|----------|----------|
| Frequencies -- | -229.4374 | 9.1301   | 12.3008  |
| Frequencies -- | 18.5013   | 21.4723  | 24.4719  |
| Frequencies -- | 27.3643   | 30.2563  | 33.0735  |
| Frequencies -- | 33.6550   | 35.7267  | 38.2517  |
| Frequencies -- | 41.1255   | 42.2048  | 44.5384  |
| Frequencies -- | 45.7058   | 53.2986  | 54.5825  |
| Frequencies -- | 56.5581   | 60.6254  | 62.2876  |
| Frequencies -- | 69.0469   | 69.7679  | 71.3434  |
| Frequencies -- | 75.1688   | 79.8727  | 87.5714  |
| Frequencies -- | 94.0615   | 96.5257  | 99.6371  |
| Frequencies -- | 109.8803  | 115.2666 | 116.9601 |
| Frequencies -- | 121.4287  | 126.1149 | 130.2513 |
| Frequencies -- | 134.5203  | 136.1083 | 143.9378 |
| Frequencies -- | 150.3685  | 153.8526 | 157.8540 |
| Frequencies -- | 166.1521  | 179.8270 | 192.3781 |
| Frequencies -- | 193.4483  | 199.2058 | 204.0537 |
| Frequencies -- | 210.5558  | 212.3159 | 221.0765 |
| Frequencies -- | 226.2148  | 228.8947 | 234.4219 |
| Frequencies -- | 238.4351  | 250.0937 | 253.4336 |
| Frequencies -- | 254.7137  | 261.2875 | 263.7044 |
| Frequencies -- | 265.2962  | 265.5811 | 266.9760 |
| Frequencies -- | 270.8685  | 274.2042 | 276.2469 |
| Frequencies -- | 277.2754  | 290.4513 | 294.7201 |

|                |           |           |           |
|----------------|-----------|-----------|-----------|
| Frequencies -- | 300.0698  | 303.9533  | 305.9397  |
| Frequencies -- | 317.0287  | 318.4168  | 327.1818  |
| Frequencies -- | 327.4313  | 330.5478  | 333.5323  |
| Frequencies -- | 359.7380  | 368.8851  | 376.4624  |
| Frequencies -- | 380.6782  | 391.4655  | 404.2456  |
| Frequencies -- | 404.8879  | 405.1177  | 405.8220  |
| Frequencies -- | 409.9793  | 410.5303  | 411.2130  |
| Frequencies -- | 422.8070  | 424.7536  | 431.7519  |
| Frequencies -- | 433.3557  | 434.4640  | 439.9271  |
| Frequencies -- | 441.8169  | 450.7183  | 454.4756  |
| Frequencies -- | 484.4910  | 493.5080  | 520.0372  |
| Frequencies -- | 522.1301  | 525.1239  | 539.6490  |
| Frequencies -- | 539.8753  | 542.0938  | 544.2362  |
| Frequencies -- | 545.9315  | 550.1832  | 551.0425  |
| Frequencies -- | 564.3802  | 570.3515  | 590.1318  |
| Frequencies -- | 593.0660  | 600.0519  | 611.6089  |
| Frequencies -- | 615.6614  | 617.1716  | 619.1980  |
| Frequencies -- | 623.7505  | 629.7743  | 633.4703  |
| Frequencies -- | 636.4852  | 639.1826  | 642.4059  |
| Frequencies -- | 643.6744  | 649.1498  | 651.3510  |
| Frequencies -- | 663.0836  | 670.7453  | 688.1286  |
| Frequencies -- | 691.7444  | 702.1683  | 711.2867  |
| Frequencies -- | 711.8987  | 712.4695  | 715.0730  |
| Frequencies -- | 716.5981  | 717.7318  | 719.5027  |
| Frequencies -- | 737.5076  | 738.4348  | 741.6849  |
| Frequencies -- | 744.2236  | 745.4638  | 750.6208  |
| Frequencies -- | 766.0611  | 767.6929  | 773.6339  |
| Frequencies -- | 782.3755  | 782.9955  | 794.6596  |
| Frequencies -- | 805.9506  | 806.8058  | 820.7421  |
| Frequencies -- | 830.3692  | 857.5955  | 861.7113  |
| Frequencies -- | 862.5946  | 865.5951  | 868.0775  |
| Frequencies -- | 871.3097  | 873.5588  | 880.3673  |
| Frequencies -- | 887.2646  | 892.8048  | 898.4954  |
| Frequencies -- | 907.8122  | 916.2054  | 918.2265  |
| Frequencies -- | 936.9464  | 937.5252  | 943.0160  |
| Frequencies -- | 945.7687  | 963.6828  | 975.7230  |
| Frequencies -- | 986.6099  | 987.4207  | 987.8880  |
| Frequencies -- | 990.6303  | 993.6646  | 995.9957  |
| Frequencies -- | 996.7735  | 997.8784  | 1004.6150 |
| Frequencies -- | 1005.9575 | 1006.3484 | 1009.7966 |
| Frequencies -- | 1010.9488 | 1015.0844 | 1015.7810 |
| Frequencies -- | 1019.9431 | 1025.3412 | 1038.5327 |
| Frequencies -- | 1038.9139 | 1044.5175 | 1045.5266 |
| Frequencies -- | 1051.0326 | 1053.9085 | 1054.9011 |
| Frequencies -- | 1058.1738 | 1059.0329 | 1060.8432 |
| Frequencies -- | 1074.6198 | 1086.5108 | 1089.9758 |
| Frequencies -- | 1091.2360 | 1092.0462 | 1092.2371 |
| Frequencies -- | 1119.1542 | 1127.3769 | 1141.2903 |
| Frequencies -- | 1174.9623 | 1182.8840 | 1183.3562 |
| Frequencies -- | 1183.3868 | 1184.4516 | 1184.6112 |
| Frequencies -- | 1186.8780 | 1205.1156 | 1206.3944 |
| Frequencies -- | 1207.4678 | 1207.7677 | 1209.2488 |
| Frequencies -- | 1215.5270 | 1221.9869 | 1228.2113 |
| Frequencies -- | 1244.9233 | 1248.9194 | 1251.9310 |
| Frequencies -- | 1269.9651 | 1277.2270 | 1300.5814 |
| Frequencies -- | 1311.2143 | 1315.7288 | 1328.4613 |
| Frequencies -- | 1329.3486 | 1331.5240 | 1334.4091 |
| Frequencies -- | 1335.6415 | 1338.6502 | 1344.1165 |
| Frequencies -- | 1357.7232 | 1361.8930 | 1366.0114 |
| Frequencies -- | 1368.3965 | 1368.7875 | 1370.0143 |
| Frequencies -- | 1370.7949 | 1375.9730 | 1376.9969 |
| Frequencies -- | 1378.0698 | 1414.8630 | 1421.6450 |
| Frequencies -- | 1422.7023 | 1424.7443 | 1427.4468 |

|                |           |           |           |
|----------------|-----------|-----------|-----------|
| Frequencies -- | 1439.5369 | 1440.8272 | 1443.4559 |
| Frequencies -- | 1444.6635 | 1445.5908 | 1446.2543 |
| Frequencies -- | 1452.8700 | 1469.6614 | 1470.1724 |
| Frequencies -- | 1473.0879 | 1489.7308 | 1496.6529 |
| Frequencies -- | 1496.8942 | 1497.2701 | 1499.8778 |
| Frequencies -- | 1502.5791 | 1507.9660 | 1524.4292 |
| Frequencies -- | 1564.8831 | 1570.9624 | 1583.0762 |
| Frequencies -- | 1587.6535 | 1594.2242 | 1595.1589 |
| Frequencies -- | 1596.4713 | 1597.1918 | 1598.1977 |
| Frequencies -- | 1599.7751 | 1619.9831 | 1622.7096 |
| Frequencies -- | 1623.0478 | 1624.2057 | 1624.4214 |
| Frequencies -- | 1625.0077 | 1628.3785 | 3026.2883 |
| Frequencies -- | 3034.1907 | 3118.6312 | 3146.3782 |
| Frequencies -- | 3150.3708 | 3153.6825 | 3154.3099 |
| Frequencies -- | 3155.1544 | 3160.7190 | 3162.9545 |
| Frequencies -- | 3163.6727 | 3164.8644 | 3165.9553 |
| Frequencies -- | 3170.6696 | 3174.8140 | 3177.7145 |
| Frequencies -- | 3178.1786 | 3178.5879 | 3186.1269 |
| Frequencies -- | 3187.0428 | 3187.5402 | 3189.4363 |
| Frequencies -- | 3189.8278 | 3193.0082 | 3193.1510 |
| Frequencies -- | 3195.7866 | 3196.4741 | 3202.0638 |
| Frequencies -- | 3207.2517 | 3210.1140 | 3213.7012 |
| Frequencies -- | 3250.8880 | 3273.2026 | 3296.6682 |

**Catalyst 23:**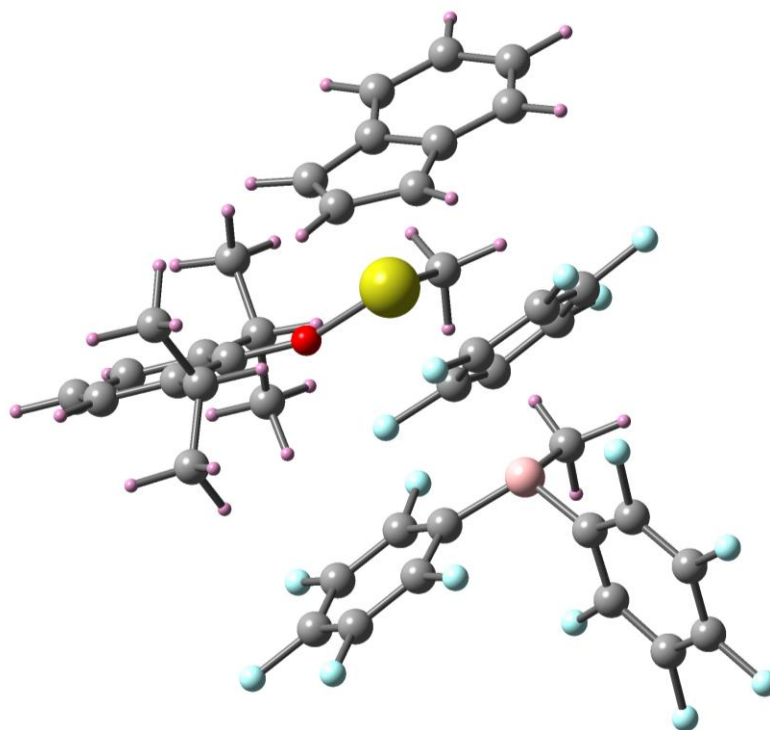

| vacuum        | toluene-like solvent | D3 dispersion |
|---------------|----------------------|---------------|
| -3235.1834396 | -3235.1935063        | -0.63293598   |

Imaginary frequency corresponding to vibration along the reaction coordinate:  $-217 \text{ cm}^{-1}$ .

|    |             |             |             |
|----|-------------|-------------|-------------|
| Ti | -1.83855300 | 1.22195500  | -0.26279100 |
| C  | -1.97612100 | 1.39433800  | -2.31315700 |
| H  | -1.46539700 | 0.48853200  | -2.67119700 |
| H  | -2.99435600 | 1.43829100  | -2.71287900 |
| H  | -1.42566100 | 2.29770400  | -2.61440100 |
| O  | -2.54915800 | -0.38376800 | 0.02565500  |
| C  | -3.45713000 | -1.40159300 | 0.38086200  |
| C  | -3.53528900 | -1.83661600 | 1.74547800  |
| C  | -4.28007800 | -1.97337700 | -0.64582100 |
| C  | -4.46112800 | -2.86205500 | 2.05150200  |
| C  | -5.18691000 | -2.99018300 | -0.26535700 |
| C  | -5.28148000 | -3.43533600 | 1.06452100  |
| H  | -4.53674100 | -3.21710800 | 3.07926500  |
| H  | -5.82203300 | -3.44327800 | -1.02667500 |
| C  | -1.85191800 | 3.37464800  | 1.00787700  |
| C  | -2.41975300 | 3.87640600  | -0.22335500 |
| C  | -2.73886900 | 2.39027900  | 1.54380000  |
| C  | -3.64951400 | 3.13633800  | -0.47084100 |
| C  | -3.80023500 | 2.16577100  | 0.59946700  |
| F  | 7.78851600  | -0.45822000 | -0.77916300 |
| C  | 6.40390500  | -0.38336900 | -0.78737600 |
| C  | 5.73398500  | 0.62301300  | -0.07656100 |
| C  | 5.63818200  | -1.31619100 | -1.50657200 |
| C  | 4.32489700  | 0.67713400  | -0.10192000 |
| F  | 6.46086000  | 1.55551800  | 0.65438000  |

|   |             |             |             |
|---|-------------|-------------|-------------|
| C | 4.23533900  | -1.21230800 | -1.49818500 |
| F | 6.27031000  | -2.33013300 | -2.21576900 |
| C | 3.49488000  | -0.21675000 | -0.80483200 |
| F | 3.76999500  | 1.70593300  | 0.67080200  |
| F | 3.56116700  | -2.19982500 | -2.23509000 |
| B | 1.84456400  | -0.26138100 | -1.05059700 |
| C | 0.77238800  | 1.28812200  | 0.09958100  |
| C | 1.13500100  | 2.60184800  | -0.31315300 |
| C | 0.83715500  | 1.13416300  | 1.51124500  |
| C | 1.58551600  | 3.62243600  | 0.54164300  |
| F | 1.04437500  | 2.95828600  | -1.66648000 |
| C | 1.28420500  | 2.10750600  | 2.42147300  |
| F | 0.39872000  | -0.06957300 | 2.08428300  |
| C | 1.67674100  | 3.36413400  | 1.92230400  |
| F | 1.91645900  | 4.88471700  | 0.05916400  |
| F | 1.32278800  | 1.86970700  | 3.79007500  |
| F | 2.11160400  | 4.34989700  | 2.78635000  |
| C | -2.67474500 | -1.25598900 | 2.87776300  |
| H | -2.00874300 | -0.49998400 | 2.45015800  |
| C | -4.22520700 | -1.54002800 | -2.11870200 |
| H | -3.44359500 | -0.78380700 | -2.22073100 |
| C | 1.24982200  | -1.67353500 | -0.48251500 |
| C | 0.30700900  | -2.46483900 | -1.17974200 |
| C | 1.77756000  | -2.31647500 | 0.66694400  |
| C | -0.06664600 | -3.77059900 | -0.80711100 |
| C | 1.42616300  | -3.61144300 | 1.08854100  |
| C | 0.49845300  | -4.35315000 | 0.33815700  |
| F | 2.71305000  | -1.65899200 | 1.47136000  |
| F | 1.98194800  | -4.16335600 | 2.23641900  |
| F | 0.13531400  | -5.63172600 | 0.73145400  |
| F | -0.98737200 | -4.49171500 | -1.56227700 |
| F | -0.32432500 | -1.97280500 | -2.32979900 |
| C | 1.59048400  | 0.16686600  | -2.58378200 |
| H | 0.55078900  | 0.35053000  | -2.85281200 |
| H | 2.17171800  | 1.06212500  | -2.84301700 |
| H | 1.94833600  | -0.64859700 | -3.23250000 |
| H | -5.98537500 | -4.22678700 | 1.32916600  |
| C | -3.54568300 | -0.56105700 | 3.96686700  |
| H | -4.20945200 | 0.20418300  | 3.53528400  |
| H | -4.18106600 | -1.28423500 | 4.49962700  |
| H | -2.89859100 | -0.07668700 | 4.71618100  |
| C | -1.75914200 | -2.33686400 | 3.52360000  |
| H | -2.34348100 | -3.11642700 | 4.03493900  |
| H | -1.13093800 | -2.82819700 | 2.76870900  |
| H | -1.09278500 | -1.87229200 | 4.26659100  |
| C | -3.82322100 | -2.72075400 | -3.05140200 |
| H | -2.86386200 | -3.14344300 | -2.72996600 |
| H | -4.57519600 | -3.52403400 | -3.05056700 |
| H | -3.71331300 | -2.36332700 | -4.08771000 |
| C | -5.56540700 | -0.89122300 | -2.57568800 |
| H | -5.84051100 | -0.03752500 | -1.93555300 |
| H | -5.47536100 | -0.52828700 | -3.61239800 |
| H | -6.39773300 | -1.61076400 | -2.54635300 |
| H | -0.98958500 | 3.78324600  | 1.51599100  |
| H | -2.63125800 | 1.90202200  | 2.50554100  |
| H | -4.64900000 | 1.50461600  | 0.74215000  |
| C | -2.00619900 | 4.90753500  | -1.12069700 |



|                |             |            |             |
|----------------|-------------|------------|-------------|
| H              | -1.08194400 | 5.46068100 | -0.94852500 |
| C              | -2.82826200 | 5.21151300 | -2.20750800 |
| H              | -2.54427200 | 6.01004100 | -2.89599900 |
| C              | -4.05763400 | 4.50165900 | -2.43489500 |
| H              | -4.68083000 | 4.78734000 | -3.28512900 |
| C              | -4.47016200 | 3.46989500 | -1.58921600 |
| H              | -5.40754000 | 2.94086300 | -1.76884700 |
|                |             |            |             |
| Frequencies -- | -217.0368   | 11.8037    | 14.8913     |
| Frequencies -- | 21.5470     | 23.1880    | 30.3277     |
| Frequencies -- | 32.2720     | 34.0849    | 38.2996     |
| Frequencies -- | 40.9882     | 46.3186    | 48.3243     |
| Frequencies -- | 54.8098     | 57.2629    | 62.3880     |
| Frequencies -- | 71.0269     | 74.5043    | 81.0537     |
| Frequencies -- | 84.0804     | 91.8384    | 93.6813     |
| Frequencies -- | 97.1747     | 106.3109   | 109.7217    |
| Frequencies -- | 116.0038    | 120.6207   | 121.8058    |
| Frequencies -- | 126.8477    | 134.0629   | 140.0108    |
| Frequencies -- | 143.2989    | 151.1649   | 155.7433    |
| Frequencies -- | 157.1870    | 164.5604   | 166.3460    |
| Frequencies -- | 186.5913    | 197.4520   | 199.4162    |
| Frequencies -- | 201.6786    | 210.8432   | 215.7529    |
| Frequencies -- | 220.0110    | 221.7737   | 225.5761    |
| Frequencies -- | 237.0223    | 242.3255   | 243.5449    |
| Frequencies -- | 249.9112    | 261.7073   | 264.1163    |
| Frequencies -- | 265.7532    | 266.4773   | 267.7760    |
| Frequencies -- | 271.1642    | 272.5805   | 275.0239    |
| Frequencies -- | 276.9947    | 277.3648   | 292.8964    |
| Frequencies -- | 298.5430    | 301.9381   | 303.6972    |
| Frequencies -- | 306.1124    | 312.1151   | 313.5914    |
| Frequencies -- | 317.4718    | 319.8751   | 328.2344    |
| Frequencies -- | 331.5180    | 334.4756   | 368.8596    |
| Frequencies -- | 371.7900    | 375.4103   | 380.5380    |
| Frequencies -- | 393.0697    | 412.0918   | 421.8063    |
| Frequencies -- | 423.4893    | 425.3205   | 431.3902    |
| Frequencies -- | 432.2365    | 433.4728   | 433.5705    |
| Frequencies -- | 440.9182    | 441.2755   | 450.8755    |
| Frequencies -- | 454.3469    | 485.3867   | 516.5494    |
| Frequencies -- | 535.2383    | 538.1192   | 540.0424    |
| Frequencies -- | 542.5850    | 544.0665   | 545.9415    |
| Frequencies -- | 551.2070    | 564.1279   | 571.2849    |
| Frequencies -- | 590.9725    | 591.5702   | 599.3777    |
| Frequencies -- | 604.8684    | 608.1502   | 628.3940    |
| Frequencies -- | 629.4957    | 637.6050   | 641.9897    |
| Frequencies -- | 643.8468    | 649.1673   | 669.3208    |
| Frequencies -- | 673.0781    | 692.8818   | 714.4206    |
| Frequencies -- | 717.7029    | 720.1608   | 725.6240    |
| Frequencies -- | 737.3509    | 737.5529   | 740.6756    |
| Frequencies -- | 749.7955    | 761.6242   | 768.9800    |
| Frequencies -- | 783.4264    | 796.3478   | 815.4720    |
| Frequencies -- | 818.1023    | 820.8039   | 830.6004    |
| Frequencies -- | 863.1066    | 875.6174   | 876.0406    |
| Frequencies -- | 880.8068    | 886.9184   | 893.0292    |
| Frequencies -- | 898.8695    | 907.6196   | 919.3633    |
| Frequencies -- | 922.0688    | 925.8868   | 931.2201    |
| Frequencies -- | 932.4447    | 939.2944   | 963.5177    |
| Frequencies -- | 965.4694    | 977.9022   | 987.2728    |
| Frequencies -- | 991.6768    | 993.7551   | 997.7869    |
| Frequencies -- | 1007.5920   | 1011.9284  | 1039.0304   |
| Frequencies -- | 1043.8795   | 1055.0834  | 1057.6794   |
| Frequencies -- | 1060.2827   | 1065.0308  | 1068.7383   |
| Frequencies -- | 1072.8848   | 1086.8559  | 1112.2261   |

|                |           |           |           |
|----------------|-----------|-----------|-----------|
| Frequencies -- | 1113.8795 | 1117.3044 | 1141.0557 |
| Frequencies -- | 1166.6413 | 1167.9475 | 1177.1207 |
| Frequencies -- | 1181.6942 | 1183.7440 | 1186.3586 |
| Frequencies -- | 1205.4709 | 1211.3304 | 1214.9615 |
| Frequencies -- | 1223.0177 | 1243.0779 | 1248.1009 |
| Frequencies -- | 1250.3257 | 1273.0045 | 1275.3620 |
| Frequencies -- | 1305.6204 | 1311.1206 | 1326.8119 |
| Frequencies -- | 1327.9027 | 1332.3871 | 1336.2883 |
| Frequencies -- | 1338.4490 | 1341.7920 | 1357.4054 |
| Frequencies -- | 1363.7342 | 1370.0392 | 1376.9655 |
| Frequencies -- | 1377.3220 | 1383.8580 | 1400.8747 |
| Frequencies -- | 1401.2682 | 1414.8921 | 1419.1041 |
| Frequencies -- | 1419.5549 | 1421.0724 | 1423.0936 |
| Frequencies -- | 1425.8849 | 1430.2008 | 1434.3955 |
| Frequencies -- | 1443.1985 | 1446.6380 | 1469.2861 |
| Frequencies -- | 1470.3856 | 1473.2399 | 1473.4448 |
| Frequencies -- | 1486.8943 | 1488.8154 | 1489.3465 |
| Frequencies -- | 1491.0103 | 1492.5999 | 1498.8743 |
| Frequencies -- | 1499.8654 | 1501.9656 | 1502.4265 |
| Frequencies -- | 1506.4223 | 1510.2454 | 1561.7523 |
| Frequencies -- | 1570.3042 | 1582.2081 | 1594.3659 |
| Frequencies -- | 1596.2391 | 1597.0182 | 1605.2506 |
| Frequencies -- | 1619.1492 | 1622.7622 | 1629.2470 |
| Frequencies -- | 3005.0362 | 3008.6617 | 3020.0205 |
| Frequencies -- | 3023.0517 | 3024.6520 | 3038.3212 |
| Frequencies -- | 3103.7411 | 3106.7898 | 3109.6385 |
| Frequencies -- | 3111.1595 | 3113.6100 | 3117.3050 |
| Frequencies -- | 3121.5439 | 3136.1981 | 3147.3893 |
| Frequencies -- | 3147.9200 | 3158.8064 | 3166.0992 |
| Frequencies -- | 3166.2428 | 3170.0486 | 3175.9196 |
| Frequencies -- | 3178.1833 | 3188.4988 | 3188.9460 |
| Frequencies -- | 3200.6144 | 3201.4676 | 3216.7767 |
| Frequencies -- | 3249.1172 | 3276.3131 | 3300.1212 |

**Catalyst 24:**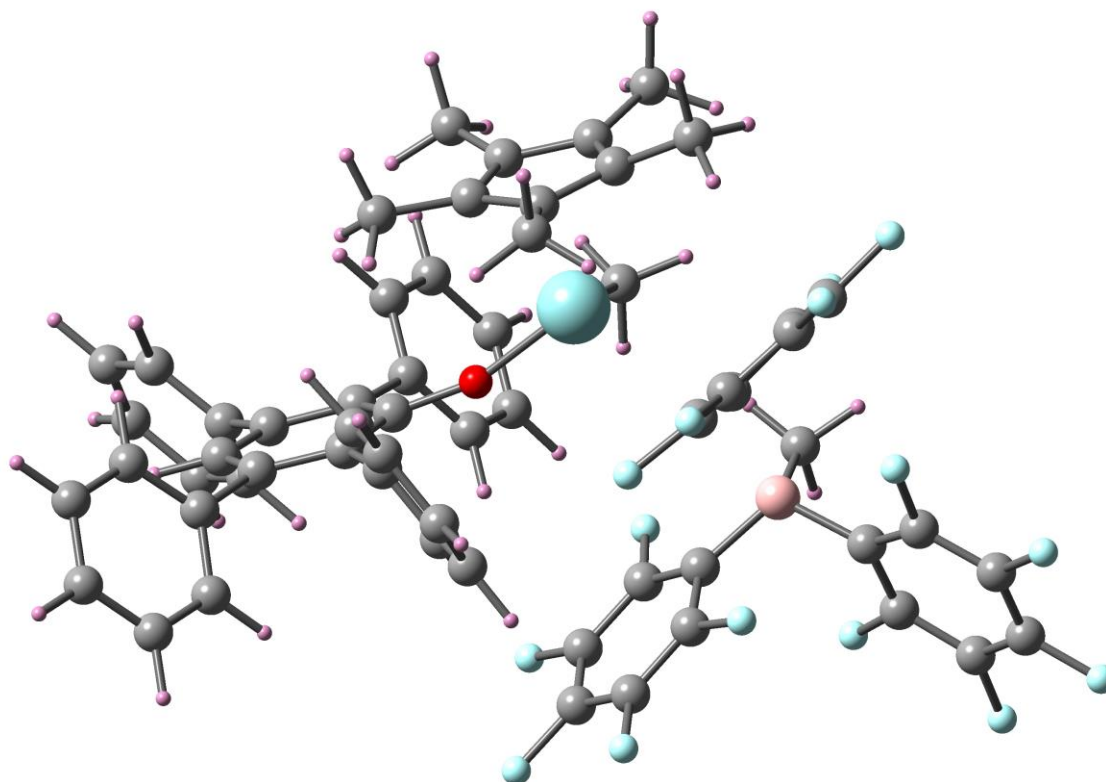

| <b>vacuum</b> | <b>toluene-like solvent</b> | <b>D3 dispersion</b> |
|---------------|-----------------------------|----------------------|
| -3954.5930776 | -3954.6059203               | -0.88028237          |

Imaginary frequency corresponding to vibration along the reaction coordinate:  $-234\text{ cm}^{-1}$ .

|    |             |             |             |
|----|-------------|-------------|-------------|
| Zr | -0.18640900 | 1.90787600  | -0.65455000 |
| C  | -0.04350900 | 1.66417200  | -2.84186500 |
| H  | 0.01914100  | 0.57507000  | -2.99284500 |
| H  | -0.87500600 | 2.03858300  | -3.45054900 |
| H  | 0.89268000  | 2.13616500  | -3.18531000 |
| O  | -1.59607500 | 0.59339400  | -0.26089200 |
| C  | -2.83645500 | -0.00693500 | 0.02768600  |
| C  | -3.20489800 | -0.25283700 | 1.39396000  |
| C  | -3.72048100 | -0.32098200 | -1.06066300 |
| C  | -4.53082400 | -0.71230100 | 1.66487000  |
| C  | -5.03630400 | -0.78594600 | -0.75476500 |
| C  | -5.42243100 | -0.93163100 | 0.59423700  |
| H  | -6.42255800 | -1.30226300 | 0.81512800  |
| C  | -0.43820800 | 3.99357600  | 0.79535000  |
| C  | 0.45758700  | 4.44565500  | -0.25410300 |
| C  | -1.73118300 | 3.74316300  | 0.19332900  |
| C  | -0.26097900 | 4.42072700  | -1.50219800 |
| C  | -1.61490100 | 3.98866400  | -1.22887200 |
| F  | 8.73520200  | -2.89664000 | -0.53847100 |
| C  | 7.44454500  | -2.39642800 | -0.62482400 |
| C  | 7.09137400  | -1.20328600 | 0.02264000  |
| C  | 6.45804800  | -3.07847100 | -1.35646700 |

|   |             |             |             |
|---|-------------|-------------|-------------|
| C | 5.77209100  | -0.71509700 | -0.08122500 |
| F | 8.03945700  | -0.51594500 | 0.77148000  |
| C | 5.15904000  | -2.54319800 | -1.42988900 |
| F | 6.77146800  | -4.27229700 | -1.99526000 |
| C | 4.74058500  | -1.33309500 | -0.81360700 |
| F | 5.52612900  | 0.45672300  | 0.64208300  |
| F | 4.23810700  | -3.31042000 | -2.16220200 |
| B | 3.16677600  | -0.88933800 | -1.13759800 |
| C | 2.58435700  | 1.06397600  | -0.16639800 |
| C | 3.43542700  | 2.11583600  | -0.59416000 |
| C | 2.44959500  | 1.02535800  | 1.24226600  |
| C | 4.16331000  | 2.95876600  | 0.26267100  |
| F | 3.59649000  | 2.37632000  | -1.96665400 |
| C | 3.13765300  | 1.83736100  | 2.15982100  |
| F | 1.51602600  | 0.12941600  | 1.79712800  |
| C | 4.01915700  | 2.80922500  | 1.65451500  |
| F | 4.98985500  | 3.96455000  | -0.22858600 |
| F | 2.94243000  | 1.73398600  | 3.53357900  |
| F | 4.69543100  | 3.65181200  | 2.52009700  |
| C | 2.16034900  | -1.97331300 | -0.44633100 |
| C | 1.07217200  | -2.57218900 | -1.12128100 |
| C | 2.40561000  | -2.53929100 | 0.83060800  |
| C | 0.29371500  | -3.62393400 | -0.59940800 |
| C | 1.65257900  | -3.58192600 | 1.39891200  |
| C | 0.58570000  | -4.13825100 | 0.67348200  |
| F | 3.44625900  | -2.04901300 | 1.62366300  |
| F | 1.93948600  | -4.05550500 | 2.67456600  |
| F | -0.17808200 | -5.16159800 | 1.21420700  |
| F | -0.76384100 | -4.15585600 | -1.33312500 |
| F | 0.70271000  | -2.13784800 | -2.39793800 |
| C | 3.05658100  | -0.52426900 | -2.69822700 |
| H | 2.11212300  | -0.06979200 | -2.99844000 |
| H | 3.87072200  | 0.14869600  | -2.99881400 |
| H | 3.16986100  | -1.44918100 | -3.28568100 |
| C | -0.13341400 | 4.02357400  | 2.28018900  |
| H | -0.21749200 | 5.05779600  | 2.65745200  |
| H | -0.82639000 | 3.40274900  | 2.85863800  |
| H | 0.88299100  | 3.67819600  | 2.51097100  |
| C | 1.76005800  | 5.18288300  | -0.03301200 |
| H | 1.52496300  | 6.22814300  | 0.23558300  |
| H | 2.35468100  | 4.77730600  | 0.78915000  |
| H | 2.39077200  | 5.21076800  | -0.92924500 |
| C | -3.02177700 | 3.50458500  | 0.94575500  |
| H | -2.84342900 | 3.00550200  | 1.90137000  |
| H | -3.50888300 | 4.47222900  | 1.15582800  |
| H | -3.73273000 | 2.89520300  | 0.37526400  |
| C | 0.24960600  | 4.97474100  | -2.81352100 |
| H | 0.20806000  | 6.07779600  | -2.79350700 |
| H | 1.29371000  | 4.69442900  | -3.01052700 |
| H | -0.35190200 | 4.63974600  | -3.66670800 |
| C | -2.76759600 | 4.05396300  | -2.20532600 |
| H | -3.60213100 | 3.41025800  | -1.90759600 |
| H | -3.14878200 | 5.08976600  | -2.24612700 |
| H | -2.47649500 | 3.77328100  | -3.22444600 |
| C | -5.04900100 | -1.01824200 | 3.04923900  |
| C | -4.58429500 | -2.13602300 | 3.78831400  |
| C | -6.09352400 | -0.23358500 | 3.60299000  |

|                |             |             |             |
|----------------|-------------|-------------|-------------|
| C              | -5.13797800 | -2.45144800 | 5.04696300  |
| H              | -3.79497600 | -2.76615900 | 3.37630200  |
| C              | -6.64513100 | -0.54246900 | 4.86490100  |
| H              | -6.47383300 | 0.62560400  | 3.04539300  |
| C              | -6.16787500 | -1.65395900 | 5.59335600  |
| H              | -4.76734700 | -3.31989800 | 5.59666600  |
| H              | -7.44485900 | 0.07954800  | 5.27445300  |
| H              | -6.59494200 | -1.89823200 | 6.56885800  |
| C              | -6.05289500 | -1.17846500 | -1.79802900 |
| C              | -5.86971100 | -2.31937900 | -2.62102200 |
| C              | -7.27041800 | -0.45831300 | -1.90969700 |
| C              | -6.86718000 | -2.72003900 | -3.53423200 |
| H              | -4.95152100 | -2.90233300 | -2.54040400 |
| C              | -8.26779400 | -0.85278900 | -2.82725800 |
| H              | -7.43597800 | 0.41803300  | -1.27855800 |
| C              | -8.06939100 | -1.98680600 | -3.64489400 |
| H              | -6.70640200 | -3.60529500 | -4.15413300 |
| H              | -9.19483900 | -0.27888000 | -2.90079900 |
| H              | -8.84092300 | -2.29733100 | -4.35340900 |
| C              | -2.25741000 | -0.09924200 | 2.55726100  |
| C              | -1.21527200 | -1.04044100 | 2.74795600  |
| C              | -2.47685900 | 0.86586300  | 3.57429500  |
| C              | -0.42125900 | -1.02491500 | 3.91337700  |
| H              | -1.04573000 | -1.80616300 | 1.99110300  |
| C              | -1.67468400 | 0.89680700  | 4.73350700  |
| H              | -3.30205000 | 1.57273200  | 3.48066700  |
| C              | -0.64400900 | -0.05162200 | 4.90996100  |
| H              | 0.36969500  | -1.76603700 | 4.04143500  |
| H              | -1.86920200 | 1.64517900  | 5.50568900  |
| H              | -0.02756000 | -0.03664400 | 5.81135900  |
| C              | -3.31552700 | -0.22628800 | -2.50978600 |
| C              | -2.41046600 | -1.16892400 | -3.05755000 |
| C              | -3.93121100 | 0.69905700  | -3.39008000 |
| C              | -2.12662400 | -1.18716200 | -4.43894100 |
| H              | -1.94571500 | -1.90966100 | -2.41027700 |
| C              | -3.64622700 | 0.68987500  | -4.77126400 |
| H              | -4.65862200 | 1.41221400  | -2.99924600 |
| C              | -2.74295200 | -0.25653100 | -5.30322900 |
| H              | -1.43102800 | -1.93027000 | -4.83473600 |
| H              | -4.14261000 | 1.40574700  | -5.43114000 |
| H              | -2.52942500 | -0.27406400 | -6.37450500 |
| Frequencies -- | -234.0445   | -16.5406    | -6.8353     |
| Frequencies -- | 10.5579     | 12.0115     | 17.6694     |
| Frequencies -- | 18.6654     | 23.5220     | 26.6967     |
| Frequencies -- | 30.9126     | 33.9535     | 34.5775     |
| Frequencies -- | 37.3834     | 39.9496     | 41.6702     |
| Frequencies -- | 45.9862     | 47.2302     | 49.7266     |
| Frequencies -- | 54.4877     | 57.1239     | 60.3818     |
| Frequencies -- | 61.4715     | 68.1459     | 70.6533     |
| Frequencies -- | 78.4027     | 83.6843     | 86.3813     |
| Frequencies -- | 89.2985     | 96.2520     | 101.7389    |
| Frequencies -- | 108.5961    | 112.1883    | 116.4504    |
| Frequencies -- | 120.3692    | 120.9140    | 122.5918    |
| Frequencies -- | 123.9787    | 127.2147    | 132.2696    |
| Frequencies -- | 133.0300    | 136.2626    | 142.2467    |
| Frequencies -- | 143.0995    | 148.6222    | 150.7919    |
| Frequencies -- | 152.4206    | 156.4913    | 163.7086    |

|                |           |           |           |
|----------------|-----------|-----------|-----------|
| Frequencies -- | 165.2974  | 175.2394  | 179.6397  |
| Frequencies -- | 189.4383  | 192.9036  | 201.8490  |
| Frequencies -- | 202.4544  | 211.5470  | 212.6602  |
| Frequencies -- | 213.8706  | 218.1949  | 223.1546  |
| Frequencies -- | 227.5196  | 232.5113  | 241.1179  |
| Frequencies -- | 253.6001  | 257.4236  | 258.7774  |
| Frequencies -- | 263.9097  | 265.1129  | 265.7302  |
| Frequencies -- | 268.0604  | 275.7963  | 276.0358  |
| Frequencies -- | 276.4385  | 278.8780  | 282.4488  |
| Frequencies -- | 287.7188  | 292.5754  | 297.7766  |
| Frequencies -- | 301.5130  | 301.6549  | 303.5643  |
| Frequencies -- | 305.6598  | 317.0700  | 318.0485  |
| Frequencies -- | 321.6553  | 326.5617  | 327.2299  |
| Frequencies -- | 333.7995  | 336.0061  | 366.8915  |
| Frequencies -- | 375.1398  | 376.9070  | 379.9380  |
| Frequencies -- | 386.8313  | 393.5996  | 402.7329  |
| Frequencies -- | 404.4124  | 405.9872  | 410.2556  |
| Frequencies -- | 412.9701  | 414.4956  | 420.5631  |
| Frequencies -- | 426.2379  | 431.1996  | 433.6409  |
| Frequencies -- | 440.0472  | 441.5589  | 450.5749  |
| Frequencies -- | 454.4281  | 483.3684  | 485.2823  |
| Frequencies -- | 493.4624  | 520.3451  | 527.9981  |
| Frequencies -- | 535.8326  | 539.0232  | 540.4239  |
| Frequencies -- | 542.2013  | 542.6300  | 546.4788  |
| Frequencies -- | 550.3054  | 551.5666  | 566.7191  |
| Frequencies -- | 572.2666  | 583.0224  | 589.3758  |
| Frequencies -- | 593.0268  | 603.8847  | 614.6638  |
| Frequencies -- | 616.6750  | 617.8555  | 621.2347  |
| Frequencies -- | 624.5645  | 629.2586  | 631.7645  |
| Frequencies -- | 637.3833  | 640.1550  | 642.2279  |
| Frequencies -- | 644.1350  | 647.9607  | 653.1107  |
| Frequencies -- | 662.0532  | 669.8464  | 687.0671  |
| Frequencies -- | 689.5894  | 698.2610  | 703.9598  |
| Frequencies -- | 708.6874  | 710.2692  | 711.0335  |
| Frequencies -- | 717.1922  | 717.4650  | 718.4244  |
| Frequencies -- | 720.2688  | 738.4241  | 746.6742  |
| Frequencies -- | 755.8438  | 766.4609  | 771.7213  |
| Frequencies -- | 782.8095  | 783.2564  | 794.8644  |
| Frequencies -- | 798.1901  | 804.2052  | 805.2708  |
| Frequencies -- | 832.4131  | 857.5594  | 859.9690  |
| Frequencies -- | 861.2792  | 869.6585  | 870.6487  |
| Frequencies -- | 888.2079  | 899.2058  | 907.6507  |
| Frequencies -- | 914.3402  | 920.9618  | 930.7267  |
| Frequencies -- | 934.8604  | 941.4196  | 943.8122  |
| Frequencies -- | 946.2128  | 968.8329  | 971.0055  |
| Frequencies -- | 983.6710  | 985.9406  | 987.2201  |
| Frequencies -- | 992.6334  | 994.9632  | 996.4820  |
| Frequencies -- | 999.0584  | 1002.3112 | 1004.5883 |
| Frequencies -- | 1005.8154 | 1009.2486 | 1011.9609 |
| Frequencies -- | 1016.3563 | 1020.6572 | 1021.3384 |
| Frequencies -- | 1034.1254 | 1037.3638 | 1040.7652 |
| Frequencies -- | 1042.9884 | 1044.8169 | 1046.2087 |
| Frequencies -- | 1047.0877 | 1047.9391 | 1051.7599 |
| Frequencies -- | 1053.3053 | 1054.9844 | 1055.4108 |
| Frequencies -- | 1059.2500 | 1062.2218 | 1085.3596 |
| Frequencies -- | 1086.7068 | 1089.0856 | 1089.8017 |
| Frequencies -- | 1090.1541 | 1090.9573 | 1091.5183 |
| Frequencies -- | 1114.4729 | 1123.6988 | 1129.3990 |
| Frequencies -- | 1172.7072 | 1173.7939 | 1175.4462 |
| Frequencies -- | 1182.1733 | 1182.7898 | 1182.8850 |
| Frequencies -- | 1185.4436 | 1196.2870 | 1203.6510 |
| Frequencies -- | 1205.1792 | 1206.6718 | 1207.4535 |
| Frequencies -- | 1216.1409 | 1223.7220 | 1224.3219 |

|                |           |           |           |
|----------------|-----------|-----------|-----------|
| Frequencies -- | 1248.4737 | 1257.4286 | 1277.4986 |
| Frequencies -- | 1299.0585 | 1311.9346 | 1318.4277 |
| Frequencies -- | 1327.6819 | 1329.5833 | 1330.2109 |
| Frequencies -- | 1331.3022 | 1333.2434 | 1343.4219 |
| Frequencies -- | 1344.8417 | 1358.2095 | 1366.1306 |
| Frequencies -- | 1368.8878 | 1370.0850 | 1370.3720 |
| Frequencies -- | 1371.9492 | 1377.9664 | 1379.5208 |
| Frequencies -- | 1413.4655 | 1414.8321 | 1415.1335 |
| Frequencies -- | 1422.7555 | 1423.4100 | 1426.0744 |
| Frequencies -- | 1427.1816 | 1429.1293 | 1432.5367 |
| Frequencies -- | 1435.0589 | 1438.4454 | 1442.3525 |
| Frequencies -- | 1444.6070 | 1444.8754 | 1446.5516 |
| Frequencies -- | 1446.9927 | 1451.6140 | 1454.7670 |
| Frequencies -- | 1461.0049 | 1462.4616 | 1469.3748 |
| Frequencies -- | 1472.9378 | 1483.3927 | 1492.9754 |
| Frequencies -- | 1496.2197 | 1497.1190 | 1497.2253 |
| Frequencies -- | 1497.7136 | 1499.6441 | 1502.0554 |
| Frequencies -- | 1503.5341 | 1505.1845 | 1506.8510 |
| Frequencies -- | 1507.3588 | 1508.2378 | 1512.9912 |
| Frequencies -- | 1518.9294 | 1521.6006 | 1524.4626 |
| Frequencies -- | 1576.4736 | 1585.9024 | 1590.0173 |
| Frequencies -- | 1595.2973 | 1596.3342 | 1596.4946 |
| Frequencies -- | 1596.8394 | 1597.3242 | 1600.0667 |
| Frequencies -- | 1618.7398 | 1621.8704 | 1623.5043 |
| Frequencies -- | 1623.7647 | 1624.0828 | 1624.7105 |
| Frequencies -- | 3005.1504 | 3011.9354 | 3012.8268 |
| Frequencies -- | 3013.4708 | 3014.4458 | 3019.8194 |
| Frequencies -- | 3040.2432 | 3101.8340 | 3112.9264 |
| Frequencies -- | 3115.2911 | 3121.2169 | 3122.0602 |
| Frequencies -- | 3124.0553 | 3124.3979 | 3149.7502 |
| Frequencies -- | 3150.0236 | 3150.7232 | 3152.0643 |
| Frequencies -- | 3154.8327 | 3158.2928 | 3158.4180 |
| Frequencies -- | 3158.5956 | 3163.0449 | 3165.4134 |
| Frequencies -- | 3168.6126 | 3170.5525 | 3170.8083 |
| Frequencies -- | 3171.8290 | 3180.6267 | 3183.1309 |
| Frequencies -- | 3184.1643 | 3184.2054 | 3186.5159 |
| Frequencies -- | 3188.7387 | 3190.2664 | 3191.7546 |
| Frequencies -- | 3193.2664 | 3195.3055 | 3196.5193 |
| Frequencies -- | 3206.4416 | 3209.8317 | 3223.3072 |

**Catalyst 30:**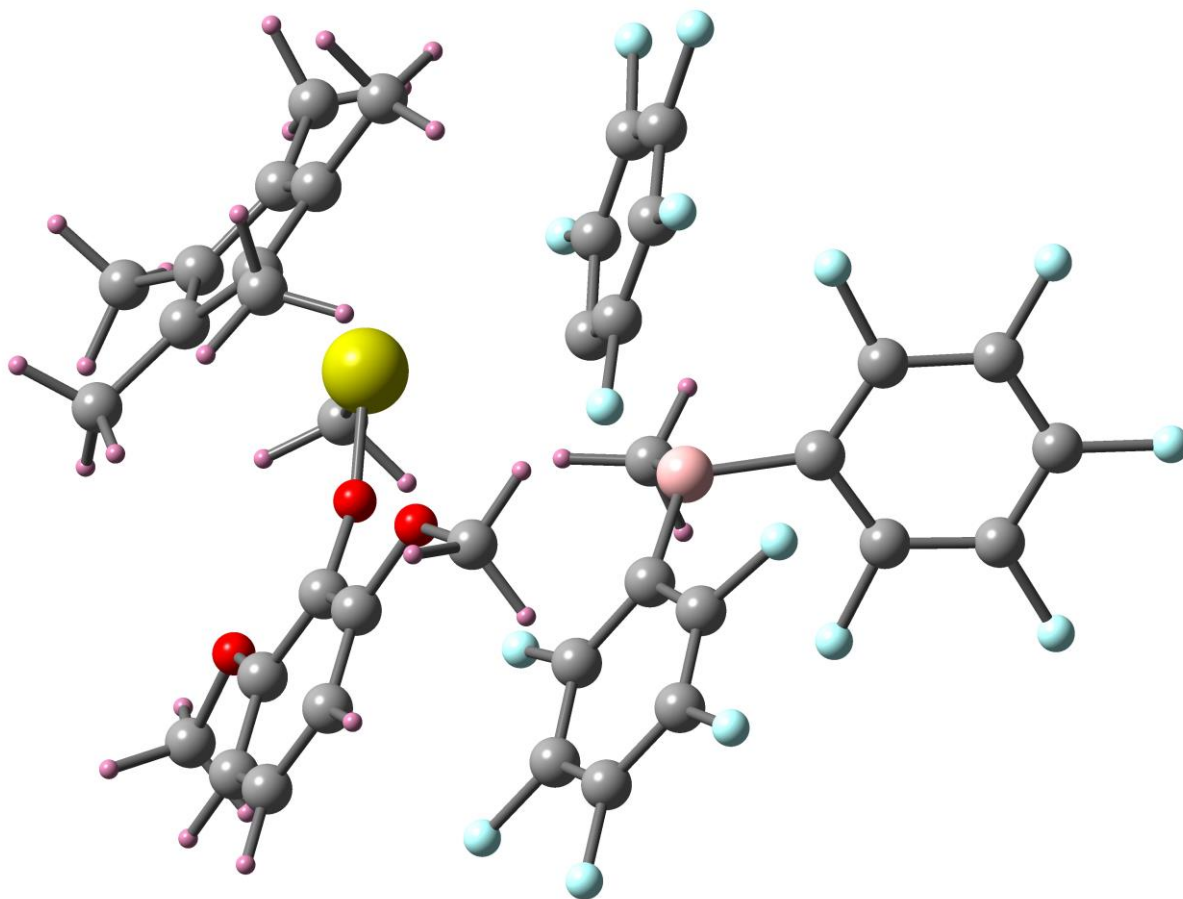

| <b>vacuum</b> | <b>toluene-like solvent</b> | <b>D3 dispersion</b> |
|---------------|-----------------------------|----------------------|
| -3271.2843549 | -3271.2941904               | -0.60057760          |

Imaginary frequency corresponding to vibration along the reaction coordinate:  $-241 \text{ cm}^{-1}$ .

|    |             |             |             |
|----|-------------|-------------|-------------|
| Ti | -2.06833500 | 1.18136300  | -0.58038000 |
| C  | -1.98958100 | 0.78168800  | -2.60289700 |
| H  | -1.26574700 | -0.04513300 | -2.61452100 |
| H  | -2.93104500 | 0.42136200  | -3.03197500 |
| H  | -1.60819900 | 1.64514500  | -3.16805500 |
| O  | -2.46923800 | -0.45237300 | 0.00032700  |
| C  | -3.05976500 | -1.60125300 | 0.47058400  |
| C  | -2.96129600 | -1.95642700 | 1.85232700  |
| C  | -3.73566100 | -2.47875400 | -0.43309300 |
| C  | -3.52779600 | -3.16884200 | 2.31195100  |
| C  | -4.29916200 | -3.68581000 | 0.04223900  |
| C  | -4.18842700 | -4.01897400 | 1.40527600  |
| H  | -3.44981900 | -3.45385600 | 3.35870900  |
| H  | -4.80511200 | -4.36666100 | -0.63829400 |
| C  | -2.66669700 | 3.39290200  | 0.41869000  |
| C  | -2.81618400 | 3.55965400  | -1.00668300 |
| C  | -3.58425000 | 2.36379700  | 0.85738600  |
| C  | -3.84176400 | 2.64723500  | -1.45378100 |



|   |             |             |             |
|---|-------------|-------------|-------------|
| C | -4.31364500 | 1.89966400  | -0.30110700 |
| F | 7.75916100  | -0.50901000 | -0.16103400 |
| C | 6.38582000  | -0.43149300 | -0.34218100 |
| C | 5.66714400  | 0.69436900  | 0.08604200  |
| C | 5.68375400  | -1.47663700 | -0.96542000 |
| C | 4.27138700  | 0.74993300  | -0.11002700 |
| F | 6.33417600  | 1.74744200  | 0.70194300  |
| C | 4.29141900  | -1.36855500 | -1.13330200 |
| F | 6.36819700  | -2.60205600 | -1.40974800 |
| C | 3.50252400  | -0.26565400 | -0.71031600 |
| F | 3.66262900  | 1.92086600  | 0.35639500  |
| F | 3.68009300  | -2.45665400 | -1.77855700 |
| B | 1.89482100  | -0.33348500 | -1.13330000 |
| C | 0.68675800  | 1.37064200  | -0.18180500 |
| C | 0.99045700  | 2.62484800  | -0.77035700 |
| C | 0.73871400  | 1.41386800  | 1.23543600  |
| C | 1.40129700  | 3.77129700  | -0.06794600 |
| F | 0.88661300  | 2.78755800  | -2.16525400 |
| C | 1.15026700  | 2.52035200  | 1.99940500  |
| F | 0.33884200  | 0.29189300  | 1.97577300  |
| C | 1.50336700  | 3.70684600  | 1.33309700  |
| F | 1.67661200  | 4.97554900  | -0.71646200 |
| F | 1.18028900  | 2.48185000  | 3.39245900  |
| F | 1.88822800  | 4.82318800  | 2.05465000  |
| C | 1.20275900  | -1.67342300 | -0.51372400 |
| C | 0.34927500  | -2.52985300 | -1.24958700 |
| C | 1.54053200  | -2.18705000 | 0.76512800  |
| C | -0.13451300 | -3.76517100 | -0.77907700 |
| C | 1.05651400  | -3.39916400 | 1.28942100  |
| C | 0.21481900  | -4.20505200 | 0.50607300  |
| F | 2.41893900  | -1.48744100 | 1.59646300  |
| F | 1.39949500  | -3.80898100 | 2.57531700  |
| F | -0.27473400 | -5.40544700 | 1.00116500  |
| F | -0.96191600 | -4.55356100 | -1.57628900 |
| F | -0.06320900 | -2.19517400 | -2.54394000 |
| C | 1.80207500  | -0.00031400 | -2.70354700 |
| H | 0.79515300  | 0.14940700  | -3.09664900 |
| H | 2.40007400  | 0.88721400  | -2.95179700 |
| H | 2.24105900  | -0.84954000 | -3.25508900 |
| C | -1.93208600 | 4.32399200  | 1.35483200  |
| H | -2.65504400 | 5.05496200  | 1.75912300  |
| H | -1.49356700 | 3.80701100  | 2.21738200  |
| H | -1.14761200 | 4.90092300  | 0.85418700  |
| C | -2.13425900 | 4.61102700  | -1.85371300 |
| H | -2.59945500 | 5.59695400  | -1.68043500 |
| H | -1.06703900 | 4.70778900  | -1.62354500 |
| H | -2.21929200 | 4.39373300  | -2.92595900 |
| C | -3.84410800 | 2.00659700  | 2.30326200  |
| H | -2.95838000 | 1.59838400  | 2.80850500  |
| H | -4.15842500 | 2.90663700  | 2.85782100  |
| H | -4.64265700 | 1.26208000  | 2.40180200  |
| C | -4.50081200 | 2.66104100  | -2.81194000 |
| H | -5.25603800 | 3.46604500  | -2.84266900 |
| H | -3.79089300 | 2.85009500  | -3.62716000 |
| H | -5.01980500 | 1.71924500  | -3.03119700 |
| C | -5.49845100 | 0.96164600  | -0.30020900 |
| H | -5.50561000 | 0.30027200  | 0.57412600  |

|   |             |             |             |
|---|-------------|-------------|-------------|
| H | -6.43451700 | 1.54674400  | -0.27875900 |
| H | -5.52710400 | 0.32495600  | -1.19375900 |
| H | -4.61698700 | -4.95605500 | 1.76437300  |
| O | -2.28636800 | -1.04433300 | 2.66002900  |
| O | -3.78889700 | -2.04996100 | -1.76059600 |
| C | -1.89134300 | -1.45244000 | 4.01582000  |
| H | -1.26730100 | -0.63009500 | 4.38271400  |
| H | -2.77136600 | -1.57726400 | 4.66786800  |
| H | -1.30083300 | -2.38151400 | 3.99400800  |
| C | -4.22415200 | -3.00602900 | -2.78864400 |
| H | -3.60513000 | -3.91535200 | -2.76600200 |
| H | -5.28924300 | -3.26485300 | -2.67010700 |
| H | -4.07507300 | -2.48107200 | -3.73946600 |

|                |           |          |          |
|----------------|-----------|----------|----------|
| Frequencies -- | -240.6620 | 10.3121  | 15.2544  |
| Frequencies -- | 18.6293   | 24.1220  | 29.5079  |
| Frequencies -- | 32.2824   | 37.2440  | 40.5948  |
| Frequencies -- | 43.6224   | 44.1626  | 52.5723  |
| Frequencies -- | 53.2720   | 60.4756  | 61.6733  |
| Frequencies -- | 66.7052   | 74.1417  | 78.7517  |
| Frequencies -- | 81.5026   | 89.9992  | 95.0505  |
| Frequencies -- | 103.7981  | 107.2503 | 110.5338 |
| Frequencies -- | 112.0913  | 115.3487 | 120.6750 |
| Frequencies -- | 124.9798  | 128.0364 | 136.0482 |
| Frequencies -- | 139.1107  | 145.4840 | 148.2854 |
| Frequencies -- | 151.5589  | 157.1441 | 165.9866 |
| Frequencies -- | 168.4799  | 172.5221 | 177.3727 |
| Frequencies -- | 180.7786  | 183.7515 | 185.9849 |
| Frequencies -- | 191.4102  | 198.1878 | 200.4106 |
| Frequencies -- | 208.7426  | 213.6189 | 221.5103 |
| Frequencies -- | 222.9148  | 226.2575 | 241.2431 |
| Frequencies -- | 256.5877  | 260.9258 | 263.9219 |
| Frequencies -- | 264.8075  | 265.2985 | 266.7117 |
| Frequencies -- | 267.9137  | 274.0541 | 275.2408 |
| Frequencies -- | 275.7362  | 276.9651 | 283.7841 |
| Frequencies -- | 285.1072  | 290.5831 | 297.4050 |
| Frequencies -- | 298.1765  | 302.6415 | 303.7271 |
| Frequencies -- | 305.3954  | 315.7310 | 317.2461 |
| Frequencies -- | 323.4212  | 327.4560 | 332.6493 |
| Frequencies -- | 340.2647  | 357.1677 | 366.0651 |
| Frequencies -- | 374.7115  | 375.3014 | 379.6984 |
| Frequencies -- | 383.2362  | 397.5143 | 404.6630 |
| Frequencies -- | 407.7879  | 422.0329 | 424.4467 |
| Frequencies -- | 431.7072  | 433.0411 | 438.0782 |
| Frequencies -- | 449.7889  | 453.1373 | 484.0191 |
| Frequencies -- | 511.8293  | 520.5341 | 530.5867 |
| Frequencies -- | 536.2806  | 539.8625 | 541.7129 |
| Frequencies -- | 542.6384  | 550.9823 | 555.3504 |
| Frequencies -- | 566.5852  | 577.6188 | 581.5504 |
| Frequencies -- | 587.9938  | 590.4026 | 595.0408 |
| Frequencies -- | 601.9602  | 608.7262 | 616.7284 |
| Frequencies -- | 628.9881  | 635.9849 | 640.0709 |
| Frequencies -- | 643.1581  | 648.0185 | 665.8648 |
| Frequencies -- | 686.9515  | 690.4082 | 711.5950 |
| Frequencies -- | 716.8976  | 719.3838 | 725.0326 |
| Frequencies -- | 728.1787  | 738.1064 | 751.0974 |
| Frequencies -- | 759.9102  | 782.5119 | 801.5004 |
| Frequencies -- | 808.6536  | 831.8907 | 846.1554 |
| Frequencies -- | 853.3319  | 887.2971 | 894.3488 |
| Frequencies -- | 907.7916  | 913.6204 | 916.8706 |
| Frequencies -- | 952.3760  | 967.0794 | 974.2593 |

|                |           |           |           |
|----------------|-----------|-----------|-----------|
| Frequencies -- | 982.9986  | 983.7357  | 989.7519  |
| Frequencies -- | 999.6355  | 1031.3509 | 1040.3470 |
| Frequencies -- | 1044.9754 | 1045.9392 | 1048.5599 |
| Frequencies -- | 1049.1666 | 1056.4954 | 1056.8609 |
| Frequencies -- | 1061.2065 | 1082.5072 | 1088.6591 |
| Frequencies -- | 1088.8359 | 1090.7641 | 1102.1074 |
| Frequencies -- | 1124.3852 | 1127.4428 | 1128.0201 |
| Frequencies -- | 1167.4548 | 1168.8162 | 1171.4926 |
| Frequencies -- | 1176.0914 | 1177.1574 | 1181.9938 |
| Frequencies -- | 1209.2543 | 1215.2699 | 1221.5665 |
| Frequencies -- | 1227.1251 | 1247.0477 | 1256.7375 |
| Frequencies -- | 1291.1567 | 1313.0225 | 1329.6297 |
| Frequencies -- | 1338.8886 | 1342.1280 | 1357.5288 |
| Frequencies -- | 1364.9870 | 1369.4604 | 1374.4069 |
| Frequencies -- | 1411.4654 | 1415.1817 | 1415.8544 |
| Frequencies -- | 1419.6163 | 1423.7757 | 1425.4817 |
| Frequencies -- | 1428.8581 | 1430.0422 | 1431.9096 |
| Frequencies -- | 1437.6315 | 1443.5521 | 1445.0977 |
| Frequencies -- | 1446.8392 | 1449.9874 | 1453.9217 |
| Frequencies -- | 1457.7614 | 1461.9569 | 1468.0560 |
| Frequencies -- | 1470.8227 | 1472.6408 | 1477.2275 |
| Frequencies -- | 1482.6113 | 1486.5397 | 1487.0864 |
| Frequencies -- | 1488.1614 | 1490.5365 | 1492.0121 |
| Frequencies -- | 1493.3963 | 1493.7115 | 1494.8250 |
| Frequencies -- | 1499.2905 | 1501.6900 | 1504.1376 |
| Frequencies -- | 1506.2837 | 1511.2173 | 1517.6480 |
| Frequencies -- | 1522.4748 | 1576.3755 | 1583.6069 |
| Frequencies -- | 1591.4162 | 1596.9707 | 1598.6579 |
| Frequencies -- | 1603.8749 | 1620.6197 | 1622.4107 |
| Frequencies -- | 3007.5461 | 3009.4810 | 3010.8116 |
| Frequencies -- | 3011.3223 | 3013.2457 | 3015.6856 |
| Frequencies -- | 3020.0273 | 3021.7528 | 3024.1327 |
| Frequencies -- | 3104.7912 | 3107.7468 | 3108.6495 |
| Frequencies -- | 3110.7423 | 3111.5655 | 3113.6395 |
| Frequencies -- | 3115.1057 | 3116.6910 | 3146.2052 |
| Frequencies -- | 3149.4046 | 3152.7472 | 3157.9401 |
| Frequencies -- | 3159.1199 | 3164.7634 | 3168.0227 |
| Frequencies -- | 3171.1196 | 3171.8771 | 3181.2320 |
| Frequencies -- | 3197.1528 | 3217.8669 | 3225.8439 |

**Catalyst 31:**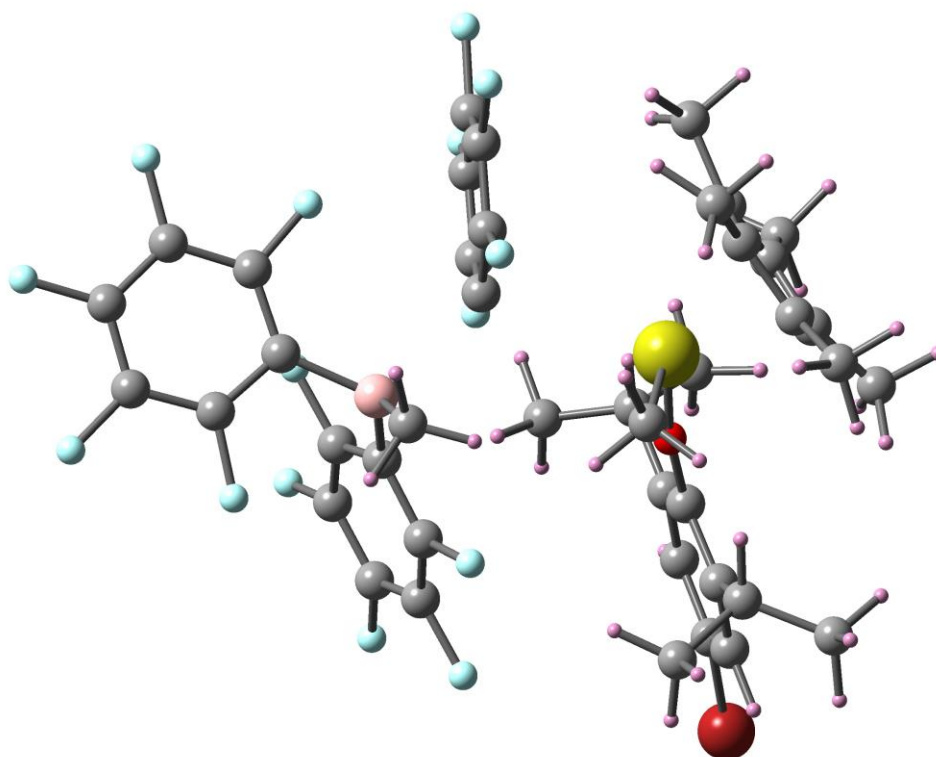

| <b>vacuum</b> | <b>toluene-like solvent</b> | <b>D3 dispersion</b> |
|---------------|-----------------------------|----------------------|
| -3290.6268308 | -3290.6369593               | -0.67063835          |

Imaginary frequency corresponding to vibration along the reaction coordinate:  $-232\text{ cm}^{-1}$ .

|    |             |             |             |
|----|-------------|-------------|-------------|
| Ti | -1.03675600 | 2.20409400  | -0.57707100 |
| C  | -0.68210100 | 1.84651000  | -2.57850800 |
| H  | -0.50072100 | 0.76139900  | -2.55876400 |
| H  | -1.45317300 | 2.07135200  | -3.32196000 |
| H  | 0.24524100  | 2.38256800  | -2.83421400 |
| O  | -2.20987600 | 0.89682000  | -0.22887400 |
| C  | -3.27584400 | 0.01535100  | 0.01553700  |
| C  | -3.48182300 | -0.49897300 | 1.33913200  |
| C  | -4.12213600 | -0.37591800 | -1.07785100 |
| C  | -4.52485200 | -1.43590600 | 1.53317600  |
| C  | -5.14353600 | -1.31969100 | -0.82372300 |
| C  | -5.33518500 | -1.84082900 | 0.46382600  |
| H  | -4.69379300 | -1.84657900 | 2.52611100  |
| H  | -5.78551300 | -1.64424300 | -1.63946800 |
| C  | -0.57129400 | 4.47516700  | 0.41386900  |
| C  | -0.53168000 | 4.66566300  | -1.01394900 |
| C  | -1.88367800 | 3.97961400  | 0.76996000  |
| C  | -1.82939700 | 4.31196000  | -1.54655900 |
| C  | -2.67089700 | 3.89106500  | -0.43987400 |
| F  | 8.04588500  | -2.77214200 | -0.32014300 |
| C  | 6.74957300  | -2.29670100 | -0.45289600 |
| C  | 6.34170800  | -1.13067000 | 0.21273300  |

|   |             |             |             |
|---|-------------|-------------|-------------|
| C | 5.81572500  | -2.97580900 | -1.25366100 |
| C | 5.01881000  | -0.66495400 | 0.06209100  |
| F | 7.24067700  | -0.44771300 | 1.02349900  |
| C | 4.51034700  | -2.46516000 | -1.37080200 |
| F | 6.18721900  | -4.13935700 | -1.91650100 |
| C | 4.03862600  | -1.28803000 | -0.73308800 |
| F | 4.71168500  | 0.48328300  | 0.79890500  |
| F | 3.63681900  | -3.21399100 | -2.17732000 |
| B | 2.48619900  | -0.86166700 | -1.12003500 |
| C | 1.80292900  | 1.13047800  | 0.01116800  |
| C | 2.61218800  | 2.22614400  | -0.36000600 |
| C | 1.65171900  | 1.00984200  | 1.40774400  |
| C | 3.29366200  | 3.06330000  | 0.54030900  |
| F | 2.79201300  | 2.54032900  | -1.72558700 |
| C | 2.30295000  | 1.80373200  | 2.36931100  |
| F | 0.77292700  | 0.03029300  | 1.92192600  |
| C | 3.15209400  | 2.83237900  | 1.92083700  |
| F | 4.07705100  | 4.13364200  | 0.10362800  |
| F | 2.10656100  | 1.62378200  | 3.73870200  |
| F | 3.79066900  | 3.65662800  | 2.83350800  |
| C | -2.64348500 | -0.10585500 | 2.56642600  |
| H | -1.90220100 | 0.64038500  | 2.25375800  |
| C | -3.98082200 | 0.16417500  | -2.51085100 |
| H | -3.27349300 | 0.99938200  | -2.48152200 |
| C | 1.42234100  | -1.93956700 | -0.53838700 |
| C | 0.30241200  | -2.40520300 | -1.26637100 |
| C | 1.61996200  | -2.62751800 | 0.68681600  |
| C | -0.54253900 | -3.44975000 | -0.84533500 |
| C | 0.80470300  | -3.67525200 | 1.15127100  |
| C | -0.28835900 | -4.09578400 | 0.37481500  |
| F | 2.67015300  | -2.26285300 | 1.53220300  |
| F | 1.05624600  | -4.28723400 | 2.37312800  |
| F | -1.11487500 | -5.11658000 | 0.81718800  |
| F | -1.62649600 | -3.84423500 | -1.62314200 |
| F | -0.03269400 | -1.83198000 | -2.49951800 |
| C | 2.44541400  | -0.36272000 | -2.64142300 |
| H | 1.51512300  | 0.11895400  | -2.94379800 |
| H | 3.27464100  | 0.32590200  | -2.85078300 |
| H | 2.58057900  | -1.24203800 | -3.29413700 |
| C | 0.44489200  | 4.97160500  | 1.41486600  |
| H | 0.09533800  | 5.94000000  | 1.81466800  |
| H | 0.56604800  | 4.30352500  | 2.27661500  |
| H | 1.42850100  | 5.14931400  | 0.97043200  |
| C | 0.60160300  | 5.27985600  | -1.80262700 |
| H | 0.46165600  | 6.37381000  | -1.86101400 |
| H | 1.58171700  | 5.10126300  | -1.34650300 |
| H | 0.64457700  | 4.90528500  | -2.83374900 |
| C | -2.40173900 | 3.84179400  | 2.18219300  |
| H | -3.31255700 | 3.23703800  | 2.23499100  |
| H | -1.66282600 | 3.39868300  | 2.86467800  |
| H | -2.64984200 | 4.84023200  | 2.58251200  |
| C | -2.30145800 | 4.60410500  | -2.95081000 |
| H | -2.63840100 | 5.65391800  | -3.01036100 |
| H | -1.50628600 | 4.47748300  | -3.69611000 |
| H | -3.14981500 | 3.97526800  | -3.25079600 |
| C | -4.16234200 | 3.65896500  | -0.49856500 |
| H | -4.50428200 | 2.91710700  | 0.23402400  |

|    |             |             |             |
|----|-------------|-------------|-------------|
| H  | -4.68832800 | 4.60428000  | -0.27776000 |
| H  | -4.49349700 | 3.32788800  | -1.48873400 |
| C  | -3.52284300 | 0.52971000  | 3.68603700  |
| H  | -4.19426500 | 1.30930100  | 3.29682100  |
| H  | -4.14827100 | -0.22585200 | 4.18482200  |
| H  | -2.87836000 | 0.98090500  | 4.45682700  |
| C  | -1.85494000 | -1.31995300 | 3.13735000  |
| H  | -1.13855400 | -1.70549200 | 2.40430600  |
| H  | -1.28777800 | -1.01608400 | 4.03033500  |
| H  | -2.52679000 | -2.14158700 | 3.42666900  |
| C  | -3.39204500 | -0.91179600 | -3.47129400 |
| H  | -3.36198400 | -0.52316800 | -4.50192500 |
| H  | -2.37250400 | -1.18831400 | -3.18067400 |
| H  | -4.00285900 | -1.82677400 | -3.47312600 |
| C  | -5.32386300 | 0.71665400  | -3.07378800 |
| H  | -5.77818700 | 1.45892400  | -2.40047700 |
| H  | -5.14638200 | 1.19741300  | -4.04939100 |
| H  | -6.06392100 | -0.08032500 | -3.23732800 |
| Br | -6.76673000 | -3.15218500 | 0.77493900  |

|                |           |          |          |
|----------------|-----------|----------|----------|
| Frequencies -- | -231.6162 | -5.0141  | 9.9553   |
| Frequencies -- | 13.3910   | 17.4303  | 25.9553  |
| Frequencies -- | 27.2775   | 28.4199  | 33.0321  |
| Frequencies -- | 35.2197   | 40.2906  | 42.2948  |
| Frequencies -- | 46.0031   | 50.0829  | 55.8426  |
| Frequencies -- | 65.4610   | 71.4681  | 80.2747  |
| Frequencies -- | 81.9106   | 84.5402  | 88.8038  |
| Frequencies -- | 95.0024   | 99.6249  | 107.4231 |
| Frequencies -- | 109.4450  | 113.4551 | 116.6279 |
| Frequencies -- | 118.6813  | 120.2562 | 124.0330 |
| Frequencies -- | 127.1977  | 128.5592 | 131.5763 |
| Frequencies -- | 137.9513  | 146.1599 | 150.2213 |
| Frequencies -- | 151.5844  | 155.1228 | 158.6091 |
| Frequencies -- | 162.8614  | 166.3721 | 168.3113 |
| Frequencies -- | 176.4355  | 180.0226 | 190.1998 |
| Frequencies -- | 196.8784  | 200.2188 | 203.3665 |
| Frequencies -- | 204.2034  | 207.1332 | 218.7952 |
| Frequencies -- | 222.8399  | 228.1904 | 229.7335 |
| Frequencies -- | 239.2320  | 242.2302 | 245.8705 |
| Frequencies -- | 250.0725  | 255.0346 | 262.0722 |
| Frequencies -- | 263.6452  | 265.2930 | 265.6128 |
| Frequencies -- | 268.9911  | 272.4836 | 274.7062 |
| Frequencies -- | 276.5594  | 285.7998 | 286.2575 |
| Frequencies -- | 295.8787  | 296.4056 | 298.9462 |
| Frequencies -- | 301.6894  | 303.3516 | 304.0756 |
| Frequencies -- | 308.8667  | 311.2045 | 315.8772 |
| Frequencies -- | 316.8587  | 324.1816 | 325.9163 |
| Frequencies -- | 332.7846  | 333.3100 | 352.5237 |
| Frequencies -- | 364.4722  | 376.3652 | 382.2337 |
| Frequencies -- | 382.9340  | 385.4847 | 408.1122 |
| Frequencies -- | 416.5174  | 421.5912 | 424.2960 |
| Frequencies -- | 427.2414  | 431.4298 | 432.0502 |
| Frequencies -- | 437.1219  | 437.6577 | 449.1045 |
| Frequencies -- | 453.0942  | 463.0323 | 483.1959 |
| Frequencies -- | 508.7068  | 527.8738 | 535.8300 |
| Frequencies -- | 539.2346  | 540.4293 | 540.9401 |
| Frequencies -- | 550.5722  | 552.7551 | 559.5843 |
| Frequencies -- | 566.9028  | 581.8386 | 588.4332 |
| Frequencies -- | 590.8798  | 602.1727 | 608.2703 |
| Frequencies -- | 610.0001  | 622.7879 | 625.7218 |
| Frequencies -- | 629.3672  | 637.1091 | 641.1854 |

|                |           |           |           |
|----------------|-----------|-----------|-----------|
| Frequencies -- | 642.7358  | 644.3686  | 661.6714  |
| Frequencies -- | 682.8596  | 706.4283  | 706.6944  |
| Frequencies -- | 717.8765  | 720.0429  | 741.1181  |
| Frequencies -- | 754.6896  | 768.0322  | 778.6736  |
| Frequencies -- | 785.5121  | 801.6189  | 806.0409  |
| Frequencies -- | 806.7976  | 838.4239  | 877.3233  |
| Frequencies -- | 879.6734  | 894.6588  | 895.8527  |
| Frequencies -- | 907.9762  | 908.8191  | 915.4179  |
| Frequencies -- | 921.2483  | 933.6080  | 936.9327  |
| Frequencies -- | 945.2795  | 962.7798  | 965.1908  |
| Frequencies -- | 966.5976  | 973.1799  | 974.4210  |
| Frequencies -- | 992.1955  | 1003.9244 | 1020.7052 |
| Frequencies -- | 1038.8889 | 1040.2421 | 1043.0063 |
| Frequencies -- | 1044.6213 | 1046.0153 | 1051.2758 |
| Frequencies -- | 1060.2299 | 1066.7366 | 1070.1639 |
| Frequencies -- | 1084.3400 | 1088.4019 | 1088.9274 |
| Frequencies -- | 1101.6613 | 1111.7060 | 1116.1598 |
| Frequencies -- | 1121.5503 | 1125.0555 | 1164.4961 |
| Frequencies -- | 1171.6111 | 1171.9389 | 1176.1066 |
| Frequencies -- | 1180.0416 | 1183.1239 | 1197.7686 |
| Frequencies -- | 1218.2806 | 1229.4398 | 1239.5598 |
| Frequencies -- | 1250.1762 | 1268.4991 | 1297.1065 |
| Frequencies -- | 1315.3666 | 1316.9957 | 1319.4804 |
| Frequencies -- | 1331.5686 | 1332.8196 | 1344.8118 |
| Frequencies -- | 1353.6797 | 1360.0515 | 1366.9340 |
| Frequencies -- | 1372.2209 | 1372.3370 | 1403.9610 |
| Frequencies -- | 1404.1031 | 1409.9859 | 1415.5968 |
| Frequencies -- | 1417.5904 | 1421.0839 | 1423.1494 |
| Frequencies -- | 1424.1297 | 1424.4549 | 1426.2803 |
| Frequencies -- | 1426.5742 | 1426.9831 | 1431.1970 |
| Frequencies -- | 1433.9742 | 1434.5434 | 1438.6367 |
| Frequencies -- | 1441.4606 | 1448.9415 | 1456.4659 |
| Frequencies -- | 1458.5438 | 1463.6322 | 1471.7088 |
| Frequencies -- | 1472.6642 | 1480.8896 | 1486.4902 |
| Frequencies -- | 1486.7384 | 1488.1024 | 1489.4024 |
| Frequencies -- | 1491.7550 | 1493.8522 | 1496.5571 |
| Frequencies -- | 1498.1130 | 1498.4713 | 1501.4298 |
| Frequencies -- | 1502.1192 | 1503.5463 | 1506.5556 |
| Frequencies -- | 1507.3664 | 1509.4613 | 1511.7535 |
| Frequencies -- | 1513.0147 | 1517.3652 | 1521.1101 |
| Frequencies -- | 1573.6127 | 1577.7569 | 1582.4827 |
| Frequencies -- | 1587.2086 | 1597.3584 | 1597.9540 |
| Frequencies -- | 1619.7441 | 1622.5597 | 3011.3562 |
| Frequencies -- | 3011.9977 | 3012.5891 | 3014.0382 |
| Frequencies -- | 3014.6476 | 3014.8979 | 3015.6543 |
| Frequencies -- | 3016.2986 | 3024.3874 | 3028.3723 |
| Frequencies -- | 3031.8384 | 3088.4631 | 3098.8631 |
| Frequencies -- | 3105.1142 | 3108.5677 | 3110.5803 |
| Frequencies -- | 3110.9131 | 3111.5585 | 3113.7958 |
| Frequencies -- | 3115.3592 | 3120.3393 | 3121.9218 |
| Frequencies -- | 3122.4806 | 3129.5607 | 3137.4820 |
| Frequencies -- | 3139.3681 | 3147.7891 | 3163.6325 |
| Frequencies -- | 3165.0655 | 3169.8459 | 3172.0465 |
| Frequencies -- | 3172.2716 | 3174.8179 | 3176.7957 |
| Frequencies -- | 3207.9963 | 3215.0631 | 3217.3868 |

**Catalyst 33:**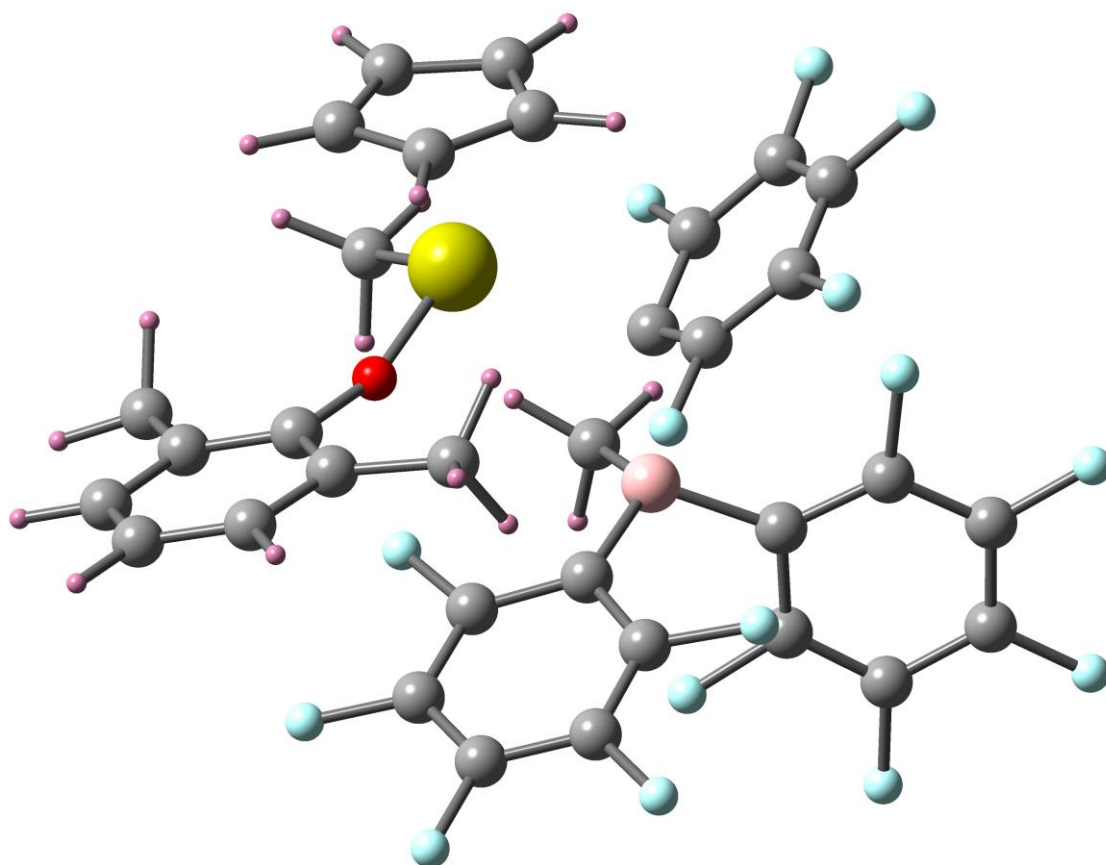

| <b>vacuum</b> | <b>toluene-like solvent</b> | <b>D3 dispersion</b> |
|---------------|-----------------------------|----------------------|
| -2924.4670496 | -2924.4769852               | -0.50699176          |

Imaginary frequency corresponding to vibration along the reaction coordinate:  $-202\text{ cm}^{-1}$ .

|    |             |             |             |
|----|-------------|-------------|-------------|
| Ti | -1.95516400 | 1.67602400  | -0.76127700 |
| C  | -2.04655700 | 1.50851300  | -2.83122800 |
| H  | -1.76443900 | 0.45798700  | -2.99442300 |
| H  | -3.01258100 | 1.69921700  | -3.31330200 |
| H  | -1.28617900 | 2.18473500  | -3.25292400 |
| O  | -2.90561300 | 0.25256500  | -0.27544300 |
| C  | -3.99351100 | -0.51012500 | 0.17822500  |
| C  | -4.13295600 | -0.78343900 | 1.57401600  |
| C  | -4.91859500 | -1.01242800 | -0.78933300 |
| C  | -5.25255100 | -1.54709100 | 1.98248600  |
| C  | -6.01389000 | -1.77363600 | -0.32013500 |
| C  | -6.18943800 | -2.03649500 | 1.05241300  |
| H  | -5.37720500 | -1.76743100 | 3.04421300  |
| H  | -6.72747500 | -2.16987900 | -1.04459100 |
| H  | -7.04146700 | -2.62766700 | 1.39296800  |
| H  | -1.37031200 | 3.86094700  | 1.48274900  |
| C  | -2.03306000 | 3.70198100  | 0.64039300  |
| C  | -1.82715600 | 4.16574100  | -0.70572600 |
| C  | -3.30541900 | 3.04655100  | 0.69655900  |



|   |             |             |             |
|---|-------------|-------------|-------------|
| H | -0.97419600 | 4.72665300  | -1.07249500 |
| C | -2.96908200 | 3.78957300  | -1.47970500 |
| H | -3.76201500 | 2.60530300  | 1.57514900  |
| C | -3.87985600 | 3.08474000  | -0.61779600 |
| H | -3.12427000 | 4.01057800  | -2.52922300 |
| H | -4.84130700 | 2.66889800  | -0.90359400 |
| F | 7.07503000  | -1.69524200 | -0.11971600 |
| C | 5.73665600  | -1.36937500 | -0.27827900 |
| C | 5.24310600  | -0.12926400 | 0.15171700  |
| C | 4.84264700  | -2.27285200 | -0.87702800 |
| C | 3.87782500  | 0.17828600  | -0.02297500 |
| F | 6.09937900  | 0.78776900  | 0.74998200  |
| C | 3.49114900  | -1.91244300 | -1.02539500 |
| F | 5.29928500  | -3.50953200 | -1.31537500 |
| C | 2.92488400  | -0.67774200 | -0.60737400 |
| F | 3.50341200  | 1.44181500  | 0.45692300  |
| F | 2.67895000  | -2.88320200 | -1.63374600 |
| B | 1.32099000  | -0.45312100 | -1.00947600 |
| C | 0.52517600  | 1.39628600  | -0.19679800 |
| C | 1.08880500  | 2.56593000  | -0.78535100 |
| C | 0.53012800  | 1.46333300  | 1.22612300  |
| C | 1.64540300  | 3.64420900  | -0.07688400 |
| F | 1.08771300  | 2.71314300  | -2.17969800 |
| C | 1.09070500  | 2.49821700  | 1.99436400  |
| F | -0.10076500 | 0.45276500  | 1.95845800  |
| C | 1.66092300  | 3.59968100  | 1.32948400  |
| F | 2.15323000  | 4.75938200  | -0.73215300 |
| F | 1.05719100  | 2.47800300  | 3.38255800  |
| F | 2.19751200  | 4.64534100  | 2.05231900  |
| C | -3.11690000 | -0.34918300 | 2.61468300  |
| H | -2.20892300 | -0.96659900 | 2.55876500  |
| H | -2.79280500 | 0.69073600  | 2.49620200  |
| H | -3.53001900 | -0.46205200 | 3.62621800  |
| C | -4.75264200 | -0.77443300 | -2.27886100 |
| H | -4.83577400 | 0.29237600  | -2.53515000 |
| H | -3.77349600 | -1.12152000 | -2.63471200 |
| H | -5.52680200 | -1.31275900 | -2.84172200 |
| C | 0.40604600  | -1.62994300 | -0.33013600 |
| C | -0.65611100 | -2.28380800 | -0.99592900 |
| C | 0.70911400  | -2.20917400 | 0.92972500  |
| C | -1.36247600 | -3.38941800 | -0.48553100 |
| C | 0.03346600  | -3.31113400 | 1.48566400  |
| C | -1.01431100 | -3.91371400 | 0.76892400  |
| F | 1.74160100  | -1.68739300 | 1.71483100  |
| F | 0.39035100  | -3.80969900 | 2.73297100  |
| F | -1.69999200 | -4.99604600 | 1.29757300  |
| F | -2.40382500 | -3.95974700 | -1.20988200 |
| F | -1.08840900 | -1.84213100 | -2.25355200 |
| C | 1.28621600  | -0.23145200 | -2.60913300 |
| H | 0.33444400  | 0.09980900  | -3.02507400 |
| H | 2.05925600  | 0.48460700  | -2.92048300 |
| H | 1.52672100  | -1.19375900 | -3.09005600 |

|                |           |         |         |
|----------------|-----------|---------|---------|
| Frequencies -- | -201.7217 | 15.1970 | 20.7775 |
| Frequencies -- | 28.2776   | 29.6115 | 31.9944 |
| Frequencies -- | 34.5072   | 40.3492 | 41.0385 |
| Frequencies -- | 50.8576   | 54.4365 | 56.9947 |

|                |           |           |           |
|----------------|-----------|-----------|-----------|
| Frequencies -- | 61.2759   | 68.5757   | 82.6612   |
| Frequencies -- | 91.4189   | 99.1993   | 103.0578  |
| Frequencies -- | 103.7286  | 110.5020  | 119.4030  |
| Frequencies -- | 121.2104  | 128.3128  | 135.5473  |
| Frequencies -- | 138.2971  | 143.1620  | 144.5303  |
| Frequencies -- | 151.6122  | 156.8648  | 163.4780  |
| Frequencies -- | 165.6302  | 185.5898  | 199.1606  |
| Frequencies -- | 201.9781  | 206.8973  | 218.9718  |
| Frequencies -- | 221.1878  | 230.1751  | 233.2761  |
| Frequencies -- | 240.2445  | 248.9630  | 250.0575  |
| Frequencies -- | 263.9222  | 265.3856  | 267.0391  |
| Frequencies -- | 270.1456  | 271.9034  | 272.7811  |
| Frequencies -- | 275.9955  | 277.3304  | 290.3549  |
| Frequencies -- | 300.0535  | 301.8620  | 305.3723  |
| Frequencies -- | 309.1342  | 317.5668  | 320.2825  |
| Frequencies -- | 323.3290  | 330.6407  | 333.1756  |
| Frequencies -- | 349.8462  | 357.3480  | 373.2747  |
| Frequencies -- | 376.0667  | 380.2211  | 403.0210  |
| Frequencies -- | 408.8579  | 423.7234  | 426.1767  |
| Frequencies -- | 431.8881  | 433.7356  | 442.6045  |
| Frequencies -- | 451.3631  | 454.9533  | 486.1253  |
| Frequencies -- | 494.5851  | 502.6483  | 514.9423  |
| Frequencies -- | 541.1153  | 544.5309  | 548.1301  |
| Frequencies -- | 551.4543  | 552.0089  | 563.7912  |
| Frequencies -- | 566.0422  | 571.7843  | 575.9299  |
| Frequencies -- | 595.1293  | 629.3055  | 630.6308  |
| Frequencies -- | 638.3829  | 642.1749  | 643.8873  |
| Frequencies -- | 648.6617  | 676.7275  | 689.1466  |
| Frequencies -- | 694.9928  | 716.2157  | 717.8827  |
| Frequencies -- | 722.1373  | 734.9431  | 739.2499  |
| Frequencies -- | 744.9671  | 751.9618  | 783.4732  |
| Frequencies -- | 787.6778  | 803.0889  | 811.7128  |
| Frequencies -- | 824.3601  | 834.0789  | 841.0864  |
| Frequencies -- | 843.5560  | 880.1145  | 895.7750  |
| Frequencies -- | 899.1540  | 908.4093  | 909.4168  |
| Frequencies -- | 909.7636  | 918.3695  | 919.2514  |
| Frequencies -- | 923.8126  | 989.7319  | 991.0109  |
| Frequencies -- | 995.0905  | 996.8492  | 1007.2037 |
| Frequencies -- | 1031.0610 | 1040.8527 | 1043.2285 |
| Frequencies -- | 1044.7171 | 1051.3411 | 1056.0917 |
| Frequencies -- | 1057.2296 | 1059.9093 | 1062.5957 |
| Frequencies -- | 1084.0080 | 1095.3123 | 1095.7386 |
| Frequencies -- | 1110.9477 | 1133.2198 | 1177.1757 |
| Frequencies -- | 1181.2283 | 1190.8319 | 1194.7378 |
| Frequencies -- | 1214.8600 | 1223.0989 | 1252.4567 |
| Frequencies -- | 1279.3252 | 1279.6220 | 1290.5045 |
| Frequencies -- | 1311.8040 | 1327.1001 | 1333.6768 |
| Frequencies -- | 1340.9365 | 1355.8805 | 1356.6005 |
| Frequencies -- | 1372.2243 | 1379.6796 | 1395.9025 |
| Frequencies -- | 1402.5087 | 1415.1138 | 1420.1921 |
| Frequencies -- | 1420.9726 | 1424.1185 | 1428.8885 |
| Frequencies -- | 1435.2827 | 1446.9389 | 1449.8040 |
| Frequencies -- | 1453.4279 | 1455.7050 | 1470.8297 |
| Frequencies -- | 1473.3164 | 1473.6124 | 1490.8227 |
| Frequencies -- | 1491.8109 | 1496.7959 | 1502.6706 |
| Frequencies -- | 1506.2660 | 1509.8430 | 1571.5924 |
| Frequencies -- | 1583.9691 | 1595.6048 | 1597.1281 |
| Frequencies -- | 1601.7756 | 1605.4989 | 1619.2343 |
| Frequencies -- | 1623.1526 | 3012.3741 | 3030.2138 |
| Frequencies -- | 3033.1205 | 3043.9303 | 3116.8904 |
| Frequencies -- | 3120.7112 | 3132.5396 | 3139.6138 |
| Frequencies -- | 3145.2006 | 3154.2554 | 3160.2505 |
| Frequencies -- | 3166.5329 | 3177.5838 | 3197.6039 |

|                |           |           |           |
|----------------|-----------|-----------|-----------|
| Frequencies -- | 3209.1581 | 3250.6247 | 3257.3182 |
| Frequencies -- | 3273.6920 | 3277.2025 | 3293.9997 |

**6. Product for Transfer of H from Counterion to Cation**  
[\(return to table of contents\)](#)

**Methane**

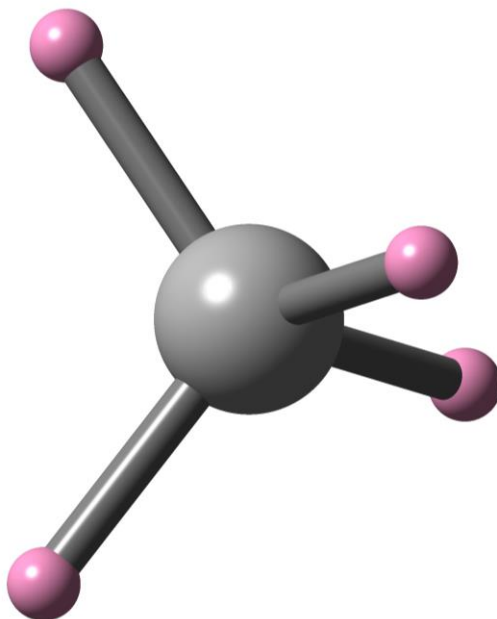

| <b>vacuum</b> | <b>toluene-like solvent</b> | <b>D3 dispersion</b> |
|---------------|-----------------------------|----------------------|
| -40.4927543   | -40.4928808                 | -0.00899984          |

|   |             |             |             |
|---|-------------|-------------|-------------|
| C | 0.00000000  | 0.00000000  | 0.00000000  |
| H | 0.63476900  | 0.63476900  | 0.63476900  |
| H | -0.63476900 | -0.63476900 | 0.63476900  |
| H | -0.63476900 | 0.63476900  | -0.63476900 |
| H | 0.63476900  | -0.63476900 | -0.63476900 |

|                |           |           |           |
|----------------|-----------|-----------|-----------|
| Frequencies -- | 1351.0512 | 1351.0512 | 1351.0512 |
| Frequencies -- | 1553.8481 | 1553.8481 | 2993.0697 |
| Frequencies -- | 3152.6002 | 3152.6002 | 3152.6002 |

**Catalyst 1:**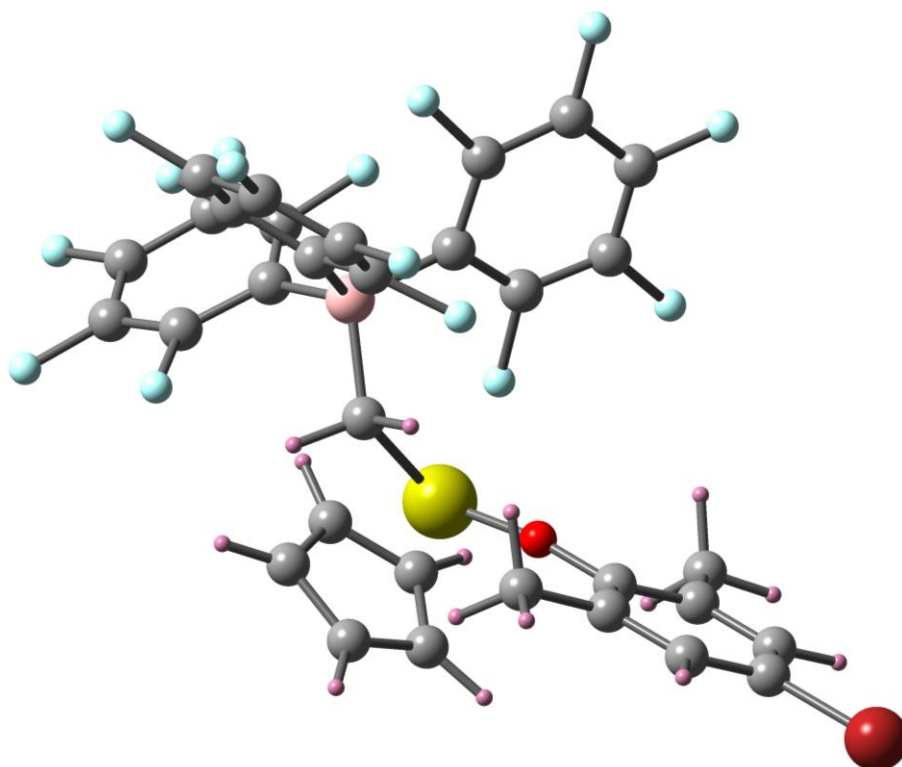

| <b>vacuum</b> | <b>toluene-like solvent</b> | <b>D3 dispersion</b> |             |
|---------------|-----------------------------|----------------------|-------------|
| -2896.5919646 | -2896.6038821               | -0.47667860          |             |
| Ti            | -0.79608400                 | -1.65907100          | -0.82316100 |
| O             | -2.39227700                 | -0.87813700          | -0.64761500 |
| C             | -3.73723300                 | -0.52987800          | -0.59756000 |
| C             | -4.18493500                 | 0.56050800           | -1.40126300 |
| C             | -4.61452100                 | -1.25195500          | 0.26505800  |
| C             | -5.55362100                 | 0.90876200           | -1.34119200 |
| C             | -5.97420700                 | -0.86651800          | 0.30035800  |
| C             | -6.43030200                 | 0.19867100           | -0.49914500 |
| H             | -5.92083200                 | 1.73591400           | -1.94737400 |
| H             | -6.66362000                 | -1.39884600          | 0.95460400  |
| H             | -1.39440400                 | -2.36724200          | -3.73682800 |
| C             | -0.94579200                 | -2.84599300          | -2.86992500 |
| C             | 0.45666500                  | -2.84938900          | -2.53710900 |
| C             | -1.64370200                 | -3.63111900          | -1.88726300 |
| H             | 1.24586000                  | -2.37497100          | -3.10650600 |
| C             | 0.61491700                  | -3.60565800          | -1.33270400 |
| H             | -2.71273400                 | -3.81961100          | -1.86857900 |
| C             | -0.68168300                 | -4.08107100          | -0.92500100 |
| H             | 1.54681900                  | -3.78441500          | -0.80579100 |
| H             | -0.88822900                 | -4.68659700          | -0.04582000 |
| F             | -0.49856100                 | 0.37636400           | 5.51130100  |
| C             | 0.03005800                  | 0.34931300           | 4.23281300  |
| C             | 0.96940000                  | 1.31112300           | 3.81760100  |
| C             | -0.35411500                 | -0.64854600          | 3.32261100  |

|    |             |             |             |
|----|-------------|-------------|-------------|
| C  | 1.49330300  | 1.27216900  | 2.50899400  |
| F  | 1.38018700  | 2.28754100  | 4.71056600  |
| C  | 0.20618900  | -0.60443400 | 2.03856600  |
| F  | -1.25982100 | -1.63717800 | 3.68891300  |
| C  | 1.12179300  | 0.31770300  | 1.52653100  |
| F  | 2.46880400  | 2.22812600  | 2.23336600  |
| F  | -0.19320300 | -1.74153600 | 1.20525200  |
| B  | 1.71623000  | 0.27710800  | -0.04295500 |
| C  | 2.13066500  | 1.83591000  | -0.49484400 |
| C  | 2.98139600  | -0.80352300 | -0.18397200 |
| C  | 0.48002800  | -0.13660200 | -1.16151300 |
| C  | 3.42332700  | 2.28550200  | -0.85606400 |
| C  | 1.15654100  | 2.86276300  | -0.55977600 |
| C  | 3.61632200  | -1.47697000 | 0.88660500  |
| C  | 3.53962600  | -1.14404800 | -1.44198100 |
| H  | -0.28332300 | 0.65804700  | -1.13141000 |
| H  | 0.94986300  | -0.12552400 | -2.15114900 |
| C  | 3.71760700  | 3.59210800  | -1.29775000 |
| F  | 4.53515000  | 1.44201100  | -0.75114100 |
| C  | 1.39648900  | 4.18046800  | -0.98627000 |
| F  | -0.16517500 | 2.60778100  | -0.13477900 |
| C  | 4.67334600  | -2.40152000 | 0.74292400  |
| F  | 3.22874400  | -1.25058900 | 2.21638400  |
| C  | 4.59011400  | -2.05637200 | -1.64329300 |
| F  | 3.07035200  | -0.52418500 | -2.61396700 |
| C  | 2.69511200  | 4.55078100  | -1.37311800 |
| F  | 5.01607800  | 3.94430500  | -1.64467300 |
| F  | 0.36807000  | 5.11682800  | -1.01964900 |
| C  | 5.16806800  | -2.69942600 | -0.53560100 |
| F  | 5.22794000  | -3.01782000 | 1.85812600  |
| F  | 5.06349000  | -2.32387900 | -2.92297200 |
| F  | 2.96245300  | 5.84046400  | -1.80647700 |
| F  | 6.20285800  | -3.60610400 | -0.70368100 |
| C  | -3.23432700 | 1.34385800  | -2.28842700 |
| H  | -2.49536400 | 1.89535500  | -1.68743700 |
| H  | -2.67445100 | 0.68369100  | -2.96886600 |
| H  | -3.78011300 | 2.07361700  | -2.90109600 |
| C  | -4.12405800 | -2.38577300 | 1.14916100  |
| H  | -3.64730300 | -3.18543700 | 0.56228300  |
| H  | -3.38570000 | -2.03358900 | 1.88547400  |
| H  | -4.95711100 | -2.83469600 | 1.70589600  |
| Br | -8.32655900 | 0.70626200  | -0.43302900 |

|                |          |          |          |
|----------------|----------|----------|----------|
| Frequencies -- | 7.7738   | 12.3405  | 19.2616  |
| Frequencies -- | 25.2082  | 29.5039  | 30.6825  |
| Frequencies -- | 34.6492  | 40.9696  | 41.5569  |
| Frequencies -- | 48.5821  | 50.0762  | 59.5035  |
| Frequencies -- | 72.4172  | 78.2582  | 88.3009  |
| Frequencies -- | 100.9422 | 103.6037 | 107.5229 |
| Frequencies -- | 113.0716 | 117.8298 | 121.0805 |
| Frequencies -- | 126.9215 | 129.4949 | 137.2030 |
| Frequencies -- | 145.3475 | 151.1001 | 151.8939 |
| Frequencies -- | 155.4428 | 157.5049 | 160.2512 |
| Frequencies -- | 163.1334 | 182.0957 | 191.8216 |
| Frequencies -- | 199.6670 | 218.3881 | 220.7322 |
| Frequencies -- | 222.0055 | 223.5102 | 227.1348 |
| Frequencies -- | 246.5418 | 249.1103 | 262.7270 |
| Frequencies -- | 264.5474 | 264.9231 | 265.4436 |

|                |           |           |           |
|----------------|-----------|-----------|-----------|
| Frequencies -- | 273.5987  | 276.9259  | 282.0399  |
| Frequencies -- | 292.1794  | 302.5995  | 306.0665  |
| Frequencies -- | 316.9656  | 320.6332  | 332.1676  |
| Frequencies -- | 334.1771  | 337.7123  | 346.9113  |
| Frequencies -- | 356.0488  | 376.3524  | 378.3761  |
| Frequencies -- | 379.9021  | 380.4416  | 384.0132  |
| Frequencies -- | 391.9525  | 408.9374  | 431.6307  |
| Frequencies -- | 432.0781  | 433.8444  | 443.1424  |
| Frequencies -- | 453.1756  | 457.1368  | 466.7334  |
| Frequencies -- | 500.8577  | 509.7932  | 532.0073  |
| Frequencies -- | 538.0855  | 545.3976  | 551.1308  |
| Frequencies -- | 561.8100  | 564.3761  | 568.0041  |
| Frequencies -- | 570.1604  | 576.7889  | 580.4869  |
| Frequencies -- | 590.0465  | 619.9733  | 626.4255  |
| Frequencies -- | 635.2783  | 639.7933  | 642.4862  |
| Frequencies -- | 657.5206  | 675.1430  | 694.1999  |
| Frequencies -- | 721.6213  | 730.6497  | 731.7318  |
| Frequencies -- | 732.8860  | 747.1553  | 752.9697  |
| Frequencies -- | 766.8665  | 782.1505  | 792.7657  |
| Frequencies -- | 801.6982  | 803.0653  | 810.3008  |
| Frequencies -- | 838.6685  | 839.4186  | 841.6564  |
| Frequencies -- | 862.9030  | 863.5304  | 879.2224  |
| Frequencies -- | 885.6516  | 889.9835  | 890.6453  |
| Frequencies -- | 907.8643  | 910.8606  | 929.3773  |
| Frequencies -- | 949.1318  | 978.1927  | 1009.5503 |
| Frequencies -- | 1011.5263 | 1025.4963 | 1029.1841 |
| Frequencies -- | 1031.4738 | 1032.8200 | 1047.4048 |
| Frequencies -- | 1047.9282 | 1051.1067 | 1055.6235 |
| Frequencies -- | 1056.8900 | 1057.9202 | 1074.6334 |
| Frequencies -- | 1090.0634 | 1096.0615 | 1122.8635 |
| Frequencies -- | 1126.5795 | 1204.5145 | 1211.6053 |
| Frequencies -- | 1212.5854 | 1215.6974 | 1265.3071 |
| Frequencies -- | 1286.2655 | 1287.0250 | 1299.2449 |
| Frequencies -- | 1315.4936 | 1320.0660 | 1336.4755 |
| Frequencies -- | 1340.3565 | 1343.6288 | 1354.5610 |
| Frequencies -- | 1383.7560 | 1391.2272 | 1395.4736 |
| Frequencies -- | 1413.1241 | 1414.3305 | 1414.7349 |
| Frequencies -- | 1419.8724 | 1424.0536 | 1427.6729 |
| Frequencies -- | 1429.1181 | 1441.7345 | 1450.9800 |
| Frequencies -- | 1468.6234 | 1470.3846 | 1474.6176 |
| Frequencies -- | 1486.1718 | 1492.0985 | 1501.3535 |
| Frequencies -- | 1504.2465 | 1586.3655 | 1586.6101 |
| Frequencies -- | 1590.4236 | 1593.6437 | 1595.0762 |
| Frequencies -- | 1618.0570 | 1619.7589 | 1633.0658 |
| Frequencies -- | 3020.5297 | 3026.4061 | 3046.4250 |
| Frequencies -- | 3107.9927 | 3112.0102 | 3137.9680 |
| Frequencies -- | 3139.4037 | 3153.8662 | 3201.0258 |
| Frequencies -- | 3203.6047 | 3233.8406 | 3238.6086 |
| Frequencies -- | 3261.4518 | 3268.4152 | 3296.3710 |

**Catalyst 2:**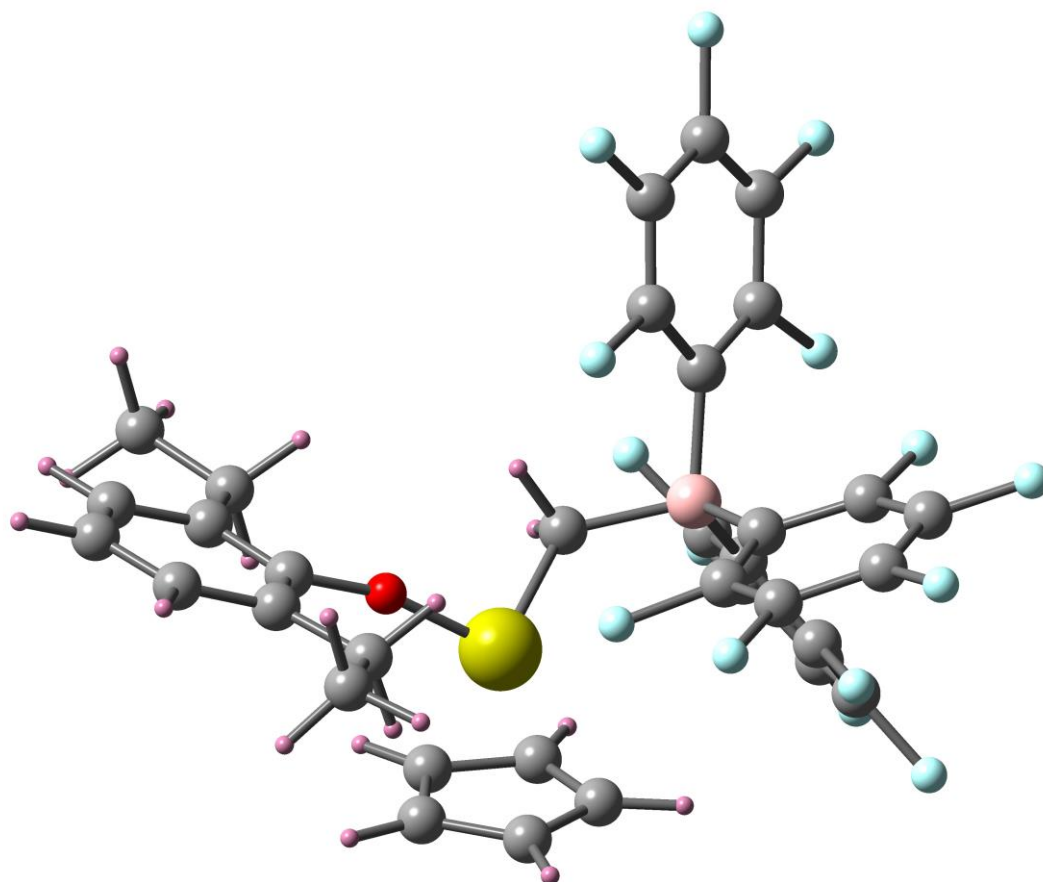

| <b>vacuum</b> | <b>toluene-like solvent</b> | <b>D3 dispersion</b> |
|---------------|-----------------------------|----------------------|
| -2962.6086205 | -2962.6202086               | -0.50224128          |

|    |             |             |             |
|----|-------------|-------------|-------------|
| Ti | -1.77470800 | -1.31174500 | -0.08040700 |
| O  | -3.24917600 | -0.40921100 | -0.49835800 |
| C  | -4.55452400 | 0.00587200  | -0.76127200 |
| C  | -4.89224600 | 0.35642300  | -2.10291000 |
| C  | -5.47232600 | 0.09058000  | 0.32923900  |
| C  | -6.22055800 | 0.77883400  | -2.33807900 |
| C  | -6.78393100 | 0.52434500  | 0.03051200  |
| C  | -7.15692800 | 0.85815600  | -1.28728100 |
| H  | -6.52706300 | 1.05632200  | -3.34523000 |
| H  | -7.51860800 | 0.60997500  | 0.82933400  |
| H  | -8.17630700 | 1.19021900  | -1.49402500 |
| H  | -2.32516100 | -3.20244500 | -2.41328000 |
| C  | -1.99241800 | -3.27658800 | -1.38132000 |
| C  | -0.62359800 | -3.27196300 | -0.93045900 |
| C  | -2.84269400 | -3.45171400 | -0.23393300 |
| H  | 0.25113200  | -3.19159200 | -1.56275900 |
| C  | -0.63260700 | -3.41116500 | 0.49437700  |
| H  | -3.92781600 | -3.49671200 | -0.24622100 |
| C  | -2.00206800 | -3.51539200 | 0.92464300  |
| H  | 0.23830200  | -3.42571000 | 1.14149100  |



|   |             |             |             |
|---|-------------|-------------|-------------|
| H | -2.33667400 | -3.63192300 | 1.95262000  |
| F | 0.98450300  | 0.83488100  | 5.81628600  |
| C | 1.01737000  | 0.63820900  | 4.44657000  |
| C | 2.18807600  | 0.89892200  | 3.70750500  |
| C | -0.11641700 | 0.17101800  | 3.76485900  |
| C | 2.19865800  | 0.69446900  | 2.31562000  |
| F | 3.32192300  | 1.34831200  | 4.36569400  |
| C | -0.01566300 | -0.00484700 | 2.37451400  |
| F | -1.29435300 | -0.10612600 | 4.44722600  |
| C | 1.08992700  | 0.22896900  | 1.55800800  |
| F | 3.40654500  | 0.95097600  | 1.67127600  |
| F | -1.26195600 | -0.49853300 | 1.79279400  |
| B | 1.17454700  | 0.10852400  | -0.12028000 |
| C | 1.57043700  | 1.68269000  | -0.57032900 |
| C | 2.26988900  | -1.04336500 | -0.61446800 |
| C | -0.27589600 | -0.25181500 | -0.92319200 |
| C | 2.79188500  | 2.13045500  | -1.13046200 |
| C | 0.64543700  | 2.73515600  | -0.35727900 |
| C | 2.86713900  | -2.03223600 | 0.19838000  |
| C | 2.63245900  | -1.16908100 | -1.97990100 |
| H | -0.89166900 | 0.65913100  | -1.04154300 |
| H | -0.01203400 | -0.59368100 | -1.93358300 |
| C | 3.05093500  | 3.46524700  | -1.50562200 |
| F | 3.86308000  | 1.25389900  | -1.31662900 |
| C | 0.85547800  | 4.08117400  | -0.70782900 |
| F | -0.58440800 | 2.47108600  | 0.28140600  |
| C | 3.77234800  | -3.01276300 | -0.25893500 |
| F | 2.55036600  | -2.12665200 | 1.56740300  |
| C | 3.52907500  | -2.12405900 | -2.49121800 |
| F | 2.08488900  | -0.29230000 | -2.92921600 |
| C | 2.07245800  | 4.45169600  | -1.30330900 |
| F | 4.27425800  | 3.81782400  | -2.06234700 |
| F | -0.12093600 | 5.04221600  | -0.46520200 |
| C | 4.11734900  | -3.05594800 | -1.61832500 |
| F | 4.31054100  | -3.94468300 | 0.62178500  |
| F | 3.83775700  | -2.15733800 | -3.84582400 |
| F | 2.30815400  | 5.76908700  | -1.66732200 |
| F | 5.00340100  | -4.01022700 | -2.09488200 |
| C | -3.83604700 | 0.27479100  | -3.20697900 |
| H | -2.96382700 | 0.87432200  | -2.89643100 |
| H | -3.47014400 | -0.76533900 | -3.27076400 |
| C | -5.01005900 | -0.24851700 | 1.74822900  |
| H | -4.62792300 | -1.28485900 | 1.76100400  |
| H | -4.14470600 | 0.39190200  | 1.99291500  |
| C | -6.05618800 | -0.10544200 | 2.87460500  |
| H | -6.42608900 | 0.92782200  | 2.96063400  |
| H | -6.92163600 | -0.76931700 | 2.72238800  |
| H | -5.59658100 | -0.37241800 | 3.83893800  |
| C | -4.26972200 | 0.72723100  | -4.61785400 |
| H | -5.09082800 | 0.11097000  | -5.01658400 |
| H | -4.59280400 | 1.77963200  | -4.62887500 |
| H | -3.41936900 | 0.63530600  | -5.31143200 |

|                |         |         |         |
|----------------|---------|---------|---------|
| Frequencies -- | 10.2976 | 13.7503 | 17.2337 |
| Frequencies -- | 24.7358 | 28.4726 | 31.9317 |
| Frequencies -- | 34.0389 | 39.7159 | 42.3914 |
| Frequencies -- | 43.6433 | 46.4888 | 52.9447 |

|                |           |           |           |
|----------------|-----------|-----------|-----------|
| Frequencies -- | 61.5498   | 63.8336   | 74.9832   |
| Frequencies -- | 85.8954   | 95.1079   | 107.9576  |
| Frequencies -- | 111.1859  | 114.9357  | 121.3548  |
| Frequencies -- | 124.7939  | 134.5166  | 138.0113  |
| Frequencies -- | 142.9348  | 147.8675  | 155.5103  |
| Frequencies -- | 157.5625  | 162.6333  | 165.5283  |
| Frequencies -- | 171.9444  | 177.3111  | 187.7328  |
| Frequencies -- | 202.9050  | 214.1706  | 216.7168  |
| Frequencies -- | 220.2997  | 223.7709  | 243.3415  |
| Frequencies -- | 257.2522  | 263.8583  | 264.2953  |
| Frequencies -- | 264.5624  | 267.8195  | 274.9740  |
| Frequencies -- | 275.8026  | 278.2293  | 283.8497  |
| Frequencies -- | 292.0987  | 301.7651  | 305.7495  |
| Frequencies -- | 306.2036  | 313.4239  | 321.8374  |
| Frequencies -- | 325.3925  | 331.4740  | 335.3884  |
| Frequencies -- | 338.9866  | 346.4028  | 360.6723  |
| Frequencies -- | 367.3784  | 373.5639  | 376.4986  |
| Frequencies -- | 378.1627  | 380.2520  | 394.9035  |
| Frequencies -- | 428.0609  | 431.1343  | 432.0221  |
| Frequencies -- | 444.9783  | 454.2459  | 459.1357  |
| Frequencies -- | 469.1001  | 505.8436  | 523.6116  |
| Frequencies -- | 528.5031  | 541.1157  | 543.8425  |
| Frequencies -- | 547.8919  | 550.2973  | 562.2955  |
| Frequencies -- | 567.9246  | 576.8581  | 577.5756  |
| Frequencies -- | 587.1785  | 603.6273  | 613.8303  |
| Frequencies -- | 624.9929  | 635.3222  | 637.1665  |
| Frequencies -- | 642.4869  | 652.3567  | 676.1084  |
| Frequencies -- | 704.6118  | 711.3135  | 716.8831  |
| Frequencies -- | 729.0540  | 730.6858  | 738.5825  |
| Frequencies -- | 745.3142  | 749.4571  | 766.1152  |
| Frequencies -- | 773.0526  | 789.2374  | 793.1618  |
| Frequencies -- | 793.9533  | 806.6383  | 823.3701  |
| Frequencies -- | 829.3582  | 838.7599  | 840.1390  |
| Frequencies -- | 841.5930  | 852.3881  | 867.6367  |
| Frequencies -- | 869.2082  | 873.9188  | 887.4997  |
| Frequencies -- | 907.2010  | 912.7694  | 924.2074  |
| Frequencies -- | 935.2022  | 980.5998  | 993.9043  |
| Frequencies -- | 996.5149  | 1007.2089 | 1023.7873 |
| Frequencies -- | 1026.5384 | 1027.9473 | 1032.5340 |
| Frequencies -- | 1034.5311 | 1045.6254 | 1049.5609 |
| Frequencies -- | 1056.9945 | 1058.1429 | 1079.4892 |
| Frequencies -- | 1089.4163 | 1094.2306 | 1096.2167 |
| Frequencies -- | 1097.3192 | 1100.3023 | 1120.7854 |
| Frequencies -- | 1126.1262 | 1195.7511 | 1202.9437 |
| Frequencies -- | 1204.4564 | 1210.9332 | 1215.8252 |
| Frequencies -- | 1262.9979 | 1277.0806 | 1287.2416 |
| Frequencies -- | 1287.9001 | 1292.7245 | 1295.6769 |
| Frequencies -- | 1314.8395 | 1319.9078 | 1328.2142 |
| Frequencies -- | 1337.6555 | 1343.2034 | 1344.4154 |
| Frequencies -- | 1348.5430 | 1382.1326 | 1390.7252 |
| Frequencies -- | 1393.8787 | 1398.9015 | 1412.5843 |
| Frequencies -- | 1414.9780 | 1417.4851 | 1417.6727 |
| Frequencies -- | 1421.5012 | 1434.8074 | 1441.8017 |
| Frequencies -- | 1451.7095 | 1466.7693 | 1466.8823 |
| Frequencies -- | 1469.1720 | 1472.2557 | 1478.8167 |
| Frequencies -- | 1492.9788 | 1499.8711 | 1503.0789 |
| Frequencies -- | 1504.7459 | 1505.8420 | 1589.6530 |
| Frequencies -- | 1593.0671 | 1595.5479 | 1599.7980 |
| Frequencies -- | 1606.9249 | 1616.4526 | 1619.6546 |
| Frequencies -- | 1630.8620 | 3002.5696 | 3007.3389 |
| Frequencies -- | 3011.9543 | 3014.3889 | 3015.0458 |
| Frequencies -- | 3049.4875 | 3058.2356 | 3115.7530 |
| Frequencies -- | 3116.1611 | 3117.3019 | 3120.8520 |

|                |           |           |           |
|----------------|-----------|-----------|-----------|
| Frequencies -- | 3121.2269 | 3171.0678 | 3204.4418 |
| Frequencies -- | 3213.3724 | 3233.1355 | 3240.4999 |
| Frequencies -- | 3259.2764 | 3268.7784 | 3298.9811 |

**Catalyst 3:**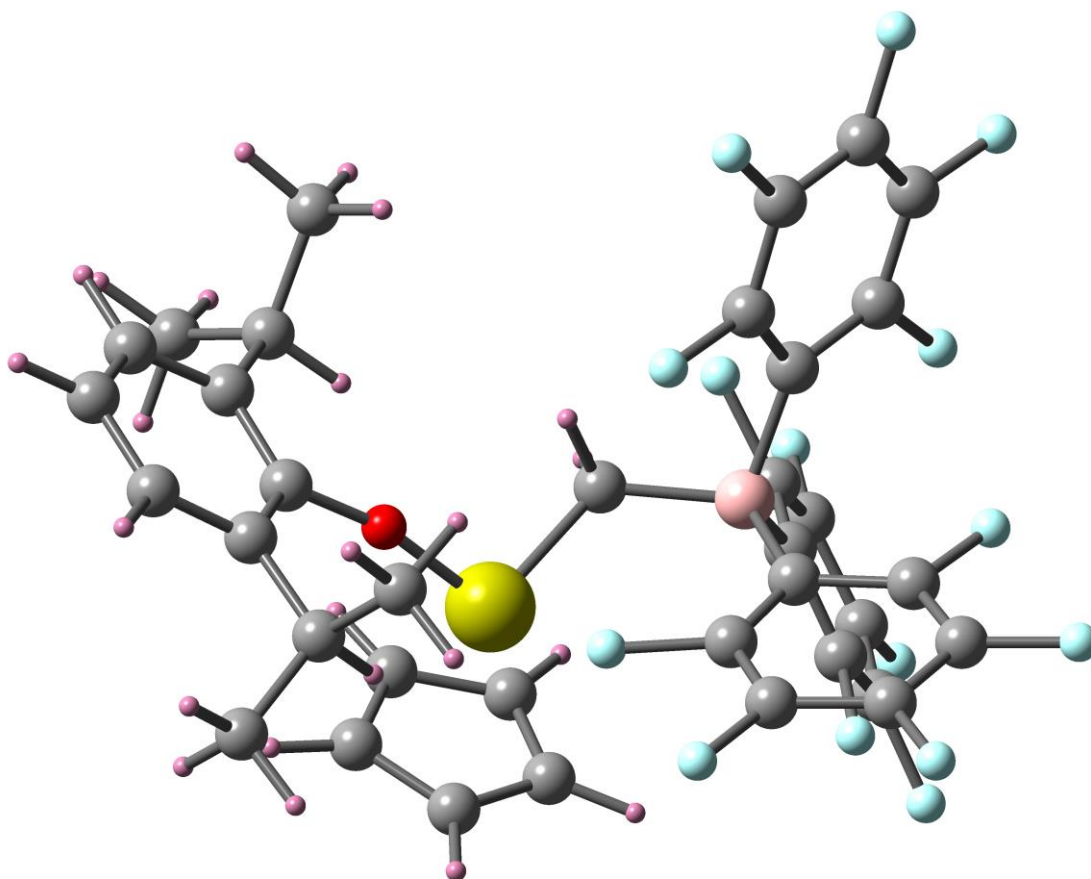

| <b>vacuum</b> | <b>toluene-like solvent</b> | <b>D3 dispersion</b> |
|---------------|-----------------------------|----------------------|
| -3041.1861128 | -3041.1973963               | -0.54022478          |

|    |             |             |             |
|----|-------------|-------------|-------------|
| Ti | -1.58724500 | -1.08736700 | -0.84804000 |
| O  | -3.06918200 | -0.12844700 | -0.64556600 |
| C  | -4.36828900 | 0.37918800  | -0.59640700 |
| C  | -4.70005800 | 1.47839400  | -1.44665000 |
| C  | -5.29501600 | -0.19847100 | 0.32794400  |
| C  | -6.01451100 | 1.99284200  | -1.35068200 |
| C  | -6.58956900 | 0.36794600  | 0.37880700  |
| C  | -6.94987900 | 1.44786400  | -0.45098400 |
| H  | -6.30657800 | 2.83253700  | -1.98213300 |
| H  | -7.32390200 | -0.03534700 | 1.07601700  |
| H  | -7.95674200 | 1.86601400  | -0.39226200 |
| H  | -2.09626200 | -1.19928400 | -3.85117200 |
| C  | -1.77774400 | -1.88168800 | -3.06740000 |
| C  | -0.41561700 | -2.15590200 | -2.68542700 |
| C  | -2.64336600 | -2.70261500 | -2.26312900 |
| H  | 0.46852700  | -1.71705100 | -3.12948600 |
| C  | -0.44390000 | -3.11898000 | -1.62607200 |
| H  | -3.72809300 | -2.72500000 | -2.31312000 |
| C  | -1.81906600 | -3.45165900 | -1.36163500 |
| H  | 0.41894400  | -3.52478800 | -1.10742200 |

|   |             |             |             |
|---|-------------|-------------|-------------|
| H | -2.16953600 | -4.15565900 | -0.61071600 |
| F | 1.20225800  | -2.80714300 | 5.17377400  |
| C | 1.22023200  | -2.15163400 | 3.95474800  |
| C | 2.37487100  | -1.47373000 | 3.51652700  |
| C | 0.08737000  | -2.15095200 | 3.12714300  |
| C | 2.37029000  | -0.81064800 | 2.27578400  |
| F | 3.50811900  | -1.47499500 | 4.31434400  |
| C | 0.17254000  | -1.46395500 | 1.90456300  |
| F | -1.07540700 | -2.80788900 | 3.51026800  |
| C | 1.26123400  | -0.76287200 | 1.38799000  |
| F | 3.56308900  | -0.18977100 | 1.91240000  |
| F | -1.06947300 | -1.54544200 | 1.14090300  |
| B | 1.32946100  | 0.14035700  | -0.03333500 |
| C | 1.66808700  | 1.68313100  | 0.55037600  |
| C | 2.45608000  | -0.46254600 | -1.09976300 |
| C | -0.11176400 | 0.29070500  | -0.92204900 |
| C | 2.86908200  | 2.41699600  | 0.39091100  |
| C | 0.70701900  | 2.36757700  | 1.33557600  |
| C | 3.07176300  | -1.73230300 | -1.03262600 |
| C | 2.82826400  | 0.26248900  | -2.26063500 |
| H | -0.73996100 | 1.10107100  | -0.50862100 |
| H | 0.17273800  | 0.59285700  | -1.93867100 |
| C | 3.07655900  | 3.71838900  | 0.89402200  |
| F | 3.97043800  | 1.86221900  | -0.26398200 |
| C | 0.86462700  | 3.66177300  | 1.86342700  |
| F | -0.50820400 | 1.73275900  | 1.66904800  |
| C | 4.00664100  | -2.22488800 | -1.96697100 |
| F | 2.74423800  | -2.63794600 | -0.00489000 |
| C | 3.75467000  | -0.17743600 | -3.22273900 |
| F | 2.25724800  | 1.52028000  | -2.50842700 |
| C | 2.06355400  | 4.35484700  | 1.62916100  |
| F | 4.28323900  | 4.37370000  | 0.68131300  |
| F | -0.14567300 | 4.25335400  | 2.61531900  |
| C | 4.36328000  | -1.43565100 | -3.07096500 |
| F | 4.56299300  | -3.48994300 | -1.81173900 |
| F | 4.07243400  | 0.61490300  | -4.31935400 |
| F | 2.24863300  | 5.63492700  | 2.12997100  |
| F | 5.28003600  | -1.89514800 | -4.00433200 |
| C | -3.68421000 | 2.10560400  | -2.41366700 |
| H | -2.76121300 | 1.51223400  | -2.36931700 |
| C | -4.89097800 | -1.33404700 | 1.28150800  |
| H | -3.98066700 | -1.80614700 | 0.88295500  |
| C | -5.95643700 | -2.46001300 | 1.38865500  |
| H | -6.88114700 | -2.11378600 | 1.87399700  |
| H | -6.22340300 | -2.85764300 | 0.39654900  |
| H | -5.56096300 | -3.28983800 | 1.99577400  |
| C | -4.52888500 | -0.76713400 | 2.68808800  |
| H | -5.40679700 | -0.30667100 | 3.16694200  |
| H | -4.16329500 | -1.57281400 | 3.34448700  |
| H | -3.74262500 | -0.00015700 | 2.61906500  |
| C | -4.17610900 | 2.07100300  | -3.88977100 |
| H | -4.42642900 | 1.04502800  | -4.20452800 |
| H | -5.07044500 | 2.69423700  | -4.04107800 |
| H | -3.38891500 | 2.45344100  | -4.55928900 |
| C | -3.30656100 | 3.55236400  | -1.97773400 |
| H | -2.52452500 | 3.95697400  | -2.64005200 |
| H | -4.17231000 | 4.23069300  | -2.02458900 |

| H              | -2.92180000 | 3.56825100 | -0.94632800 |
|----------------|-------------|------------|-------------|
| Frequencies -- | 8.9473      | 12.4309    | 15.6490     |
| Frequencies -- | 22.8341     | 23.3302    | 28.3585     |
| Frequencies -- | 32.2248     | 33.6327    | 38.6564     |
| Frequencies -- | 41.6878     | 43.2235    | 46.8830     |
| Frequencies -- | 50.4608     | 58.9571    | 61.2997     |
| Frequencies -- | 74.2631     | 82.1498    | 103.3120    |
| Frequencies -- | 108.6649    | 112.5156   | 121.0004    |
| Frequencies -- | 125.3739    | 127.7027   | 134.1654    |
| Frequencies -- | 138.0753    | 142.9472   | 148.1806    |
| Frequencies -- | 153.6271    | 156.8919   | 159.2271    |
| Frequencies -- | 164.2255    | 170.4571   | 171.3356    |
| Frequencies -- | 181.4517    | 209.1320   | 214.1754    |
| Frequencies -- | 216.5662    | 218.3852   | 221.3065    |
| Frequencies -- | 224.1173    | 233.0161   | 245.4255    |
| Frequencies -- | 247.7834    | 255.1660   | 263.9999    |
| Frequencies -- | 264.4186    | 264.7494   | 268.5755    |
| Frequencies -- | 269.8059    | 274.9210   | 278.1495    |
| Frequencies -- | 279.5697    | 286.7934   | 296.7010    |
| Frequencies -- | 302.1654    | 306.6092   | 310.7813    |
| Frequencies -- | 313.6570    | 319.2366   | 330.0276    |
| Frequencies -- | 332.4097    | 339.6923   | 350.6191    |
| Frequencies -- | 361.3480    | 369.9794   | 375.2081    |
| Frequencies -- | 377.4635    | 380.2562   | 393.7059    |
| Frequencies -- | 411.2357    | 424.7627   | 431.0683    |
| Frequencies -- | 432.0142    | 432.6969   | 438.7778    |
| Frequencies -- | 445.5698    | 454.1488   | 459.0720    |
| Frequencies -- | 469.2734    | 524.3975   | 535.3370    |
| Frequencies -- | 541.3752    | 542.4652   | 548.3098    |
| Frequencies -- | 550.8064    | 561.3839   | 570.2645    |
| Frequencies -- | 577.3430    | 587.9909   | 595.2600    |
| Frequencies -- | 604.8032    | 616.0951   | 625.3937    |
| Frequencies -- | 628.3761    | 634.9228   | 637.4449    |
| Frequencies -- | 642.8093    | 652.1109   | 676.1071    |
| Frequencies -- | 703.8416    | 716.6996   | 723.3998    |
| Frequencies -- | 730.2981    | 738.1559   | 744.5197    |
| Frequencies -- | 749.2823    | 762.1268   | 765.7561    |
| Frequencies -- | 790.1073    | 792.4458   | 796.7259    |
| Frequencies -- | 803.7555    | 815.7231   | 822.9217    |
| Frequencies -- | 838.5137    | 840.5265   | 841.1283    |
| Frequencies -- | 865.5882    | 866.5240   | 873.4361    |
| Frequencies -- | 879.5389    | 888.7168   | 906.6270    |
| Frequencies -- | 912.7710    | 923.5352   | 929.3906    |
| Frequencies -- | 931.4310    | 938.2447   | 940.1983    |
| Frequencies -- | 963.5788    | 968.2691   | 979.4873    |
| Frequencies -- | 992.0231    | 1006.0398  | 1023.6003   |
| Frequencies -- | 1027.7254   | 1032.6710  | 1034.8042   |
| Frequencies -- | 1045.5991   | 1049.9464  | 1055.1416   |
| Frequencies -- | 1057.5953   | 1074.3296  | 1080.9274   |
| Frequencies -- | 1088.8542   | 1095.9606  | 1113.1740   |
| Frequencies -- | 1117.2322   | 1122.0659  | 1126.2114   |
| Frequencies -- | 1162.4871   | 1184.9238  | 1197.5722   |
| Frequencies -- | 1204.2855   | 1204.3092  | 1211.1378   |
| Frequencies -- | 1216.0374   | 1256.2430  | 1273.5150   |
| Frequencies -- | 1286.7018   | 1296.1124  | 1306.3378   |
| Frequencies -- | 1314.8318   | 1317.8303  | 1320.4360   |
| Frequencies -- | 1332.7021   | 1337.6251  | 1338.2164   |
| Frequencies -- | 1343.1798   | 1348.5963  | 1383.3243   |
| Frequencies -- | 1389.7426   | 1394.0840  | 1398.3330   |
| Frequencies -- | 1399.2265   | 1402.4793  | 1412.5577   |
| Frequencies -- | 1417.5626   | 1418.1367  | 1420.0573   |
| Frequencies -- | 1421.6905   | 1436.4426  | 1441.7546   |

|                |           |           |           |
|----------------|-----------|-----------|-----------|
| Frequencies -- | 1450.9367 | 1467.2374 | 1469.0758 |
| Frequencies -- | 1472.2531 | 1473.9346 | 1484.8814 |
| Frequencies -- | 1486.4229 | 1487.0904 | 1488.6072 |
| Frequencies -- | 1497.9986 | 1504.2458 | 1505.6734 |
| Frequencies -- | 1508.2307 | 1589.7665 | 1592.9808 |
| Frequencies -- | 1595.6448 | 1595.9256 | 1602.8734 |
| Frequencies -- | 1616.7423 | 1619.9014 | 1631.3012 |
| Frequencies -- | 3005.8069 | 3009.1838 | 3010.1526 |
| Frequencies -- | 3012.4262 | 3012.6688 | 3051.6457 |
| Frequencies -- | 3077.0612 | 3105.5332 | 3109.9537 |
| Frequencies -- | 3111.9961 | 3114.8506 | 3116.3168 |
| Frequencies -- | 3119.1316 | 3120.8665 | 3125.9010 |
| Frequencies -- | 3126.6556 | 3166.6706 | 3188.1259 |
| Frequencies -- | 3201.6731 | 3233.3441 | 3239.9167 |
| Frequencies -- | 3258.6861 | 3266.8433 | 3299.2666 |

**Catalyst 4:**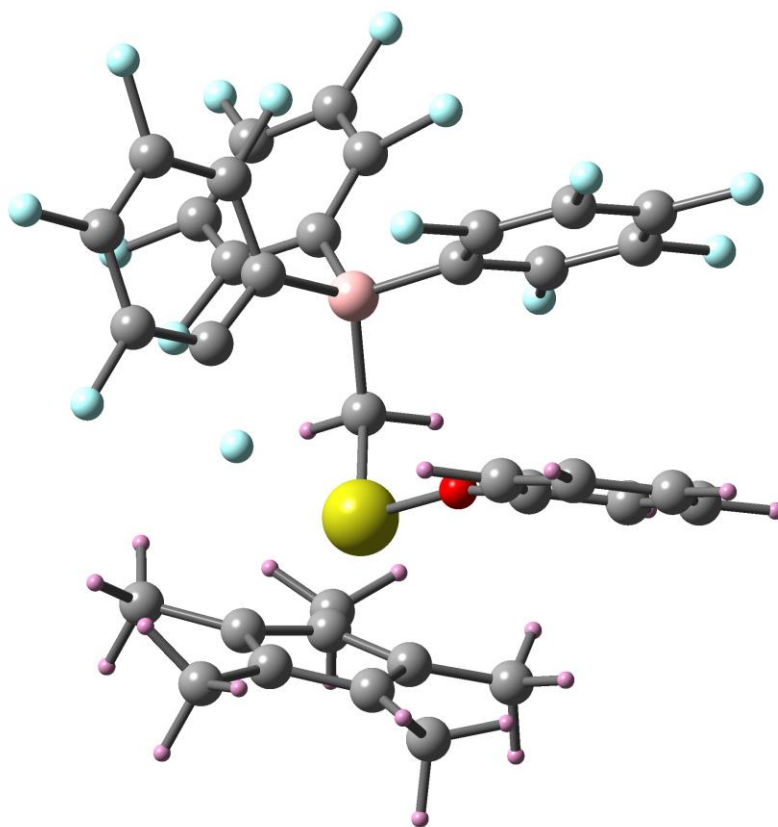

| <b>vacuum</b> | <b>toluene-like solvent</b> | <b>D3 dispersion</b> |
|---------------|-----------------------------|----------------------|
| -3001.9242174 | -3001.9353615               | -0.52467714          |

|    |             |             |             |
|----|-------------|-------------|-------------|
| Ti | 1.64300200  | -1.39216200 | -0.63215200 |
| O  | 2.61749400  | 0.02756400  | -0.15477600 |
| C  | 3.63230300  | 0.89640300  | 0.22145300  |
| C  | 4.13831500  | 0.84792700  | 1.54300700  |
| C  | 4.13206400  | 1.83953800  | -0.70827500 |
| C  | 5.15459100  | 1.74526800  | 1.92826200  |
| C  | 5.15042400  | 2.72986700  | -0.31070300 |
| C  | 5.66656600  | 2.68463400  | 1.00432400  |
| H  | 5.53749100  | 1.71612400  | 2.95050000  |
| H  | 5.53041300  | 3.46388100  | -1.02441300 |
| H  | 6.44893100  | 3.38169000  | 1.30937100  |
| C  | 1.46193700  | -2.88382500 | -2.55261200 |
| C  | 2.74416500  | -2.19523300 | -2.55796100 |
| C  | 1.42111400  | -3.72044700 | -1.38308300 |
| C  | 3.51512500  | -2.66080900 | -1.42217000 |
| C  | 2.68363900  | -3.57372700 | -0.67615500 |
| F  | -1.67660000 | -2.16367300 | 5.32166300  |
| C  | -1.50178000 | -1.59874700 | 4.06930800  |
| C  | -2.30344800 | -0.52167900 | 3.64379500  |
| C  | -0.51483100 | -2.08413100 | 3.19858200  |
| C  | -2.11039100 | 0.03461500  | 2.36571900  |



|   |             |             |             |
|---|-------------|-------------|-------------|
| F | -3.26984500 | -0.01420500 | 4.49886300  |
| C | -0.39235800 | -1.47119200 | 1.94083300  |
| F | 0.31114400  | -3.13828500 | 3.57465800  |
| C | -1.14439300 | -0.41539000 | 1.42655200  |
| F | -2.91646600 | 1.12726100  | 2.05290500  |
| F | 0.68968000  | -2.05423400 | 1.15143100  |
| B | -1.02680800 | 0.25668400  | -0.11261600 |
| C | -2.61148100 | 0.22508400  | -0.68299500 |
| C | -0.34654600 | 1.77527500  | -0.07430800 |
| C | -0.14623700 | -0.66372100 | -1.23607200 |
| C | -3.43278000 | 1.34051200  | -0.97767600 |
| C | -3.26848100 | -1.01034300 | -0.90306900 |
| C | 0.24751700  | 2.39705700  | 1.04643800  |
| C | -0.23921400 | 2.55991600  | -1.25032300 |
| H | -0.75176100 | -1.49788900 | -1.60700500 |
| H | 0.07424900  | -0.01210100 | -2.10036400 |
| C | -4.73858500 | 1.25002400  | -1.50273200 |
| F | -2.99907700 | 2.64244100  | -0.71560300 |
| C | -4.56963400 | -1.15710800 | -1.41710200 |
| F | -2.62350700 | -2.22200500 | -0.56868700 |
| C | 0.84888400  | 3.67236500  | 1.03484500  |
| F | 0.30679000  | 1.74194100  | 2.28950900  |
| C | 0.35301700  | 3.83262400  | -1.32066800 |
| F | -0.76824200 | 2.08189200  | -2.46168700 |
| C | -5.31369900 | -0.00950600 | -1.73552200 |
| F | -5.47177300 | 2.39885800  | -1.77676300 |
| F | -5.12311300 | -2.42075000 | -1.60763100 |
| C | 0.90116000  | 4.40383400  | -0.16017200 |
| F | 1.41424200  | 4.19831400  | 2.19181000  |
| F | 0.40634300  | 4.52888100  | -2.52487400 |
| F | -6.59622600 | -0.11936300 | -2.25385900 |
| F | 1.50345600  | 5.65394500  | -0.20261200 |
| C | 4.95882300  | -2.32500200 | -1.12781400 |
| H | 5.17940400  | -2.30897600 | -0.05167400 |
| H | 5.61609100  | -3.08635600 | -1.58290600 |
| H | 5.25488200  | -1.35209300 | -1.53949300 |
| C | 3.24456200  | -1.29741500 | -3.66794900 |
| H | 4.01012700  | -0.59027600 | -3.32245600 |
| H | 3.70169000  | -1.90657500 | -4.46718200 |
| H | 2.43450200  | -0.71661100 | -4.13098500 |
| C | 0.44781600  | -2.85848800 | -3.67055600 |
| H | 0.30953600  | -1.85462100 | -4.09461400 |
| H | 0.78279000  | -3.51741000 | -4.49030300 |
| H | -0.53547100 | -3.22049800 | -3.34488600 |
| C | 0.29606200  | -4.65220600 | -0.99405500 |
| H | -0.69262400 | -4.24295700 | -1.24023300 |
| H | 0.39719000  | -5.60963000 | -1.53442100 |
| H | 0.30270500  | -4.88570300 | 0.07868100  |
| C | 3.08912100  | -4.33215100 | 0.56888500  |
| H | 2.26106500  | -4.44915700 | 1.28150200  |
| H | 3.42689800  | -5.34719800 | 0.29724400  |
| H | 3.91982600  | -3.84657500 | 1.09893900  |
| H | 3.72422600  | 0.13372100  | 2.25587200  |
| H | 3.71456300  | 1.88075400  | -1.71486100 |

|                |         |         |         |
|----------------|---------|---------|---------|
| Frequencies -- | 10.7846 | 15.5227 | 21.3592 |
| Frequencies -- | 25.6165 | 27.6431 | 31.2417 |

|                |           |           |           |
|----------------|-----------|-----------|-----------|
| Frequencies -- | 32.1522   | 35.2632   | 38.9237   |
| Frequencies -- | 41.1141   | 48.5217   | 57.6285   |
| Frequencies -- | 77.1045   | 80.1389   | 82.9823   |
| Frequencies -- | 92.5033   | 102.2181  | 109.0646  |
| Frequencies -- | 110.4026  | 111.8086  | 113.9164  |
| Frequencies -- | 118.9810  | 121.6307  | 123.0281  |
| Frequencies -- | 124.6826  | 129.5158  | 133.0189  |
| Frequencies -- | 137.6405  | 144.4836  | 147.5491  |
| Frequencies -- | 148.9979  | 157.6623  | 159.2326  |
| Frequencies -- | 160.9588  | 165.2070  | 168.3953  |
| Frequencies -- | 170.0677  | 202.5796  | 216.8680  |
| Frequencies -- | 220.0133  | 222.3445  | 226.3609  |
| Frequencies -- | 251.8992  | 263.6087  | 264.5864  |
| Frequencies -- | 265.0079  | 276.1210  | 278.2583  |
| Frequencies -- | 278.8946  | 285.9317  | 289.2086  |
| Frequencies -- | 296.1526  | 302.6554  | 303.7070  |
| Frequencies -- | 306.2913  | 308.7574  | 315.8378  |
| Frequencies -- | 320.5884  | 330.0343  | 332.0346  |
| Frequencies -- | 339.3492  | 354.9134  | 364.9585  |
| Frequencies -- | 374.6643  | 376.9123  | 379.4420  |
| Frequencies -- | 379.5776  | 388.3597  | 397.6212  |
| Frequencies -- | 408.0345  | 408.8823  | 419.2257  |
| Frequencies -- | 431.2751  | 432.0371  | 438.3245  |
| Frequencies -- | 445.1237  | 452.2028  | 458.5763  |
| Frequencies -- | 467.6581  | 491.4438  | 515.2649  |
| Frequencies -- | 534.4618  | 536.9311  | 539.3686  |
| Frequencies -- | 542.0374  | 547.3525  | 556.6277  |
| Frequencies -- | 567.3118  | 580.1965  | 588.8084  |
| Frequencies -- | 600.5986  | 603.9356  | 609.8573  |
| Frequencies -- | 614.4752  | 623.9361  | 634.2271  |
| Frequencies -- | 636.3586  | 641.2173  | 653.0022  |
| Frequencies -- | 664.6532  | 675.4904  | 690.1783  |
| Frequencies -- | 704.9219  | 717.2774  | 729.9347  |
| Frequencies -- | 736.0496  | 746.6400  | 747.9078  |
| Frequencies -- | 758.6426  | 766.3345  | 801.0997  |
| Frequencies -- | 804.7797  | 823.0027  | 832.9041  |
| Frequencies -- | 842.6119  | 865.8111  | 872.9784  |
| Frequencies -- | 906.6142  | 910.3720  | 913.0878  |
| Frequencies -- | 921.8268  | 968.4663  | 970.8764  |
| Frequencies -- | 972.3730  | 972.5711  | 996.2889  |
| Frequencies -- | 1005.9617 | 1007.5763 | 1022.4314 |
| Frequencies -- | 1029.4305 | 1030.9584 | 1040.9025 |
| Frequencies -- | 1043.0590 | 1044.1622 | 1045.2978 |
| Frequencies -- | 1047.5605 | 1048.8736 | 1049.5952 |
| Frequencies -- | 1054.6201 | 1086.7278 | 1089.2629 |
| Frequencies -- | 1089.8298 | 1099.2182 | 1125.7258 |
| Frequencies -- | 1173.4467 | 1174.7428 | 1183.5501 |
| Frequencies -- | 1189.3622 | 1202.5392 | 1209.0641 |
| Frequencies -- | 1212.7410 | 1241.9773 | 1295.3789 |
| Frequencies -- | 1313.9540 | 1319.7984 | 1323.3996 |
| Frequencies -- | 1337.7775 | 1344.0079 | 1348.2507 |
| Frequencies -- | 1375.3160 | 1386.7768 | 1410.5875 |
| Frequencies -- | 1412.9047 | 1414.7742 | 1416.6790 |
| Frequencies -- | 1420.8211 | 1424.5906 | 1426.0037 |
| Frequencies -- | 1427.6881 | 1429.7997 | 1434.3051 |
| Frequencies -- | 1448.4720 | 1451.9037 | 1455.4282 |
| Frequencies -- | 1462.7638 | 1466.4466 | 1469.9981 |
| Frequencies -- | 1471.8763 | 1480.4440 | 1484.0865 |
| Frequencies -- | 1490.1392 | 1491.4036 | 1496.0892 |
| Frequencies -- | 1497.9494 | 1504.5695 | 1506.1392 |
| Frequencies -- | 1509.4968 | 1513.5718 | 1519.5672 |
| Frequencies -- | 1590.9596 | 1593.6011 | 1597.3366 |
| Frequencies -- | 1598.7746 | 1609.6216 | 1616.6871 |

|                |           |           |           |
|----------------|-----------|-----------|-----------|
| Frequencies -- | 1621.7346 | 1630.4946 | 3009.0493 |
| Frequencies -- | 3010.5643 | 3011.0935 | 3012.2054 |
| Frequencies -- | 3013.5016 | 3028.1375 | 3098.0494 |
| Frequencies -- | 3100.5787 | 3102.2409 | 3103.3737 |
| Frequencies -- | 3104.6011 | 3135.2771 | 3137.1144 |
| Frequencies -- | 3143.1241 | 3145.8797 | 3147.7403 |
| Frequencies -- | 3148.8429 | 3166.9051 | 3174.1512 |
| Frequencies -- | 3189.8647 | 3197.5742 | 3207.1118 |

**Catalyst 5:**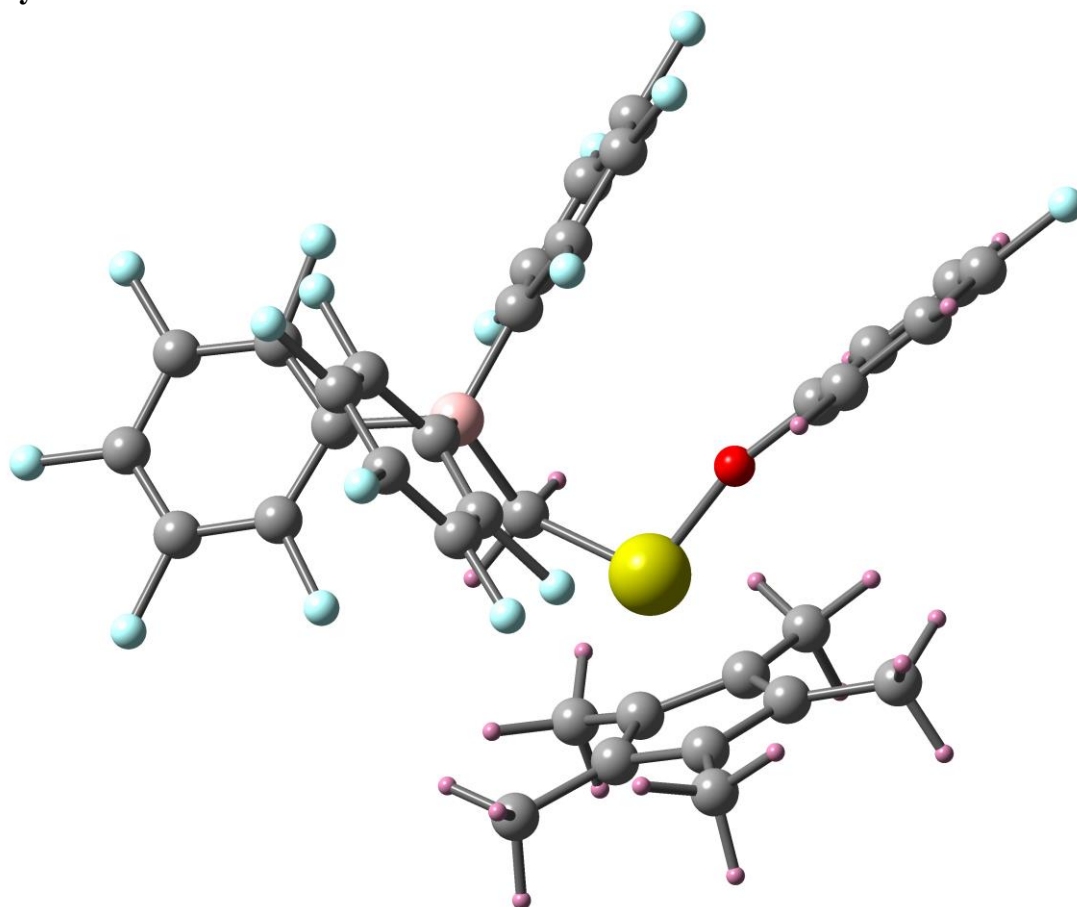

| <b>vacuum</b> | <b>toluene-like solvent</b> | <b>D3 dispersion</b> |
|---------------|-----------------------------|----------------------|
| -3101.1486692 | -3101.1606136               | -0.52463612          |

|    |             |             |             |
|----|-------------|-------------|-------------|
| Ti | 1.28909500  | -1.68140400 | -0.64797100 |
| O  | 2.45701200  | -0.38815100 | -0.23446300 |
| C  | 3.58127800  | 0.35009000  | 0.09706100  |
| C  | 4.09554200  | 0.28866600  | 1.41613400  |
| C  | 4.19172900  | 1.17980500  | -0.87540300 |
| C  | 5.22905300  | 1.04844200  | 1.76244600  |
| C  | 5.32704800  | 1.94052500  | -0.53472900 |
| C  | 5.82519700  | 1.85477100  | 0.77700500  |
| H  | 5.63807200  | 1.02656200  | 2.77209400  |
| H  | 5.81078700  | 2.59222400  | -1.26175700 |
| C  | 0.89751300  | -3.17057200 | -2.53177700 |
| C  | 2.27299200  | -2.69028600 | -2.53253300 |
| C  | 0.71438100  | -3.96797900 | -1.34863500 |
| C  | 2.94811200  | -3.24600600 | -1.37689800 |
| C  | 1.97522100  | -4.00156300 | -0.62547600 |
| F  | -1.63718600 | -1.51867200 | 5.52293500  |
| C  | -1.48643500 | -1.08905900 | 4.21523200  |
| C  | -2.13608600 | 0.07427000  | 3.75771900  |
| C  | -0.67730300 | -1.80174100 | 3.31779400  |
| C  | -1.97170500 | 0.49077900  | 2.42397000  |

|   |             |             |             |
|---|-------------|-------------|-------------|
| F | -2.92499700 | 0.80165300  | 4.63538900  |
| C | -0.57005600 | -1.31412600 | 2.00471900  |
| F | -0.00660700 | -2.95146500 | 3.72128900  |
| C | -1.18003200 | -0.18616500 | 1.45784000  |
| F | -2.61849100 | 1.67306200  | 2.07179500  |
| F | 0.31758700  | -2.13726600 | 1.18477300  |
| B | -1.11243300 | 0.33972300  | -0.14159800 |
| C | -2.73851600 | 0.40365600  | -0.57818300 |
| C | -0.30400000 | 1.78592100  | -0.28535900 |
| C | -0.39178000 | -0.72962300 | -1.25119200 |
| C | -3.50011500 | 1.56064200  | -0.87353900 |
| C | -3.50250100 | -0.78674000 | -0.65109700 |
| C | 0.46899200  | 2.41429800  | 0.71590300  |
| C | -0.26172900 | 2.47819900  | -1.52179600 |
| H | -1.11801900 | -1.47155500 | -1.60020800 |
| H | -0.08148500 | -0.14091700 | -2.13338800 |
| C | -4.85466000 | 1.54103900  | -1.26688100 |
| F | -2.94726800 | 2.83679800  | -0.74942500 |
| C | -4.85452700 | -0.86216900 | -1.03124600 |
| F | -2.91646400 | -2.02151500 | -0.29435800 |
| C | 1.17588200  | 3.62242700  | 0.54572900  |
| F | 0.61245800  | 1.83190700  | 1.98793400  |
| C | 0.42653000  | 3.68281900  | -1.74814400 |
| F | -0.95642300 | 1.96794100  | -2.63114700 |
| C | -5.54036000 | 0.31906300  | -1.35757700 |
| F | -5.52502400 | 2.72466500  | -1.55195500 |
| F | -5.51393800 | -2.08762300 | -1.08176400 |
| C | 1.15224500  | 4.27038300  | -0.69792700 |
| F | 1.91595800  | 4.16259300  | 1.59232400  |
| F | 0.40001700  | 4.29558300  | -2.99717600 |
| F | -6.87196900 | 0.27928600  | -1.74481100 |
| F | 1.84881700  | 5.45473600  | -0.89487700 |
| C | 4.42079800  | -3.13162800 | -1.05839800 |
| H | 4.61822800  | -3.09486200 | 0.02201900  |
| H | 4.95545600  | -4.01208500 | -1.45527800 |
| H | 4.88013000  | -2.24300600 | -1.50884000 |
| C | 2.91929600  | -1.91086500 | -3.65655300 |
| H | 3.81022100  | -1.36090800 | -3.32715500 |
| H | 3.24069600  | -2.60180000 | -4.45522800 |
| H | 2.22821000  | -1.19015100 | -4.11603200 |
| C | -0.08584300 | -3.00690900 | -3.66575100 |
| H | -0.02482500 | -2.01677000 | -4.13757900 |
| H | 0.12211400  | -3.75688200 | -4.44853100 |
| H | -1.12357000 | -3.15664200 | -3.34186500 |
| C | -0.53958500 | -4.71486100 | -0.95780300 |
| H | -1.45187800 | -4.21545800 | -1.30614200 |
| H | -0.52729600 | -5.72530200 | -1.40285000 |
| H | -0.62606000 | -4.84346000 | 0.12954600  |
| C | 2.24537500  | -4.78693300 | 0.63895100  |
| H | 1.38581600  | -4.79443500 | 1.32277800  |
| H | 2.46819500  | -5.83835700 | 0.38768700  |
| H | 3.10976100  | -4.39760200 | 1.19424100  |
| H | 3.60052500  | -0.33151400 | 2.16347000  |
| H | 3.77154300  | 1.23709500  | -1.87939700 |
| F | 6.95993400  | 2.60852400  | 1.11794600  |

Frequencies --

6.7060

13.2751

16.6856

|                |           |           |           |
|----------------|-----------|-----------|-----------|
| Frequencies -- | 25.1773   | 25.7799   | 27.5020   |
| Frequencies -- | 31.3395   | 32.1938   | 38.0130   |
| Frequencies -- | 41.3852   | 48.5963   | 56.2601   |
| Frequencies -- | 77.5032   | 79.3425   | 84.4099   |
| Frequencies -- | 91.0920   | 94.4184   | 106.8732  |
| Frequencies -- | 110.7804  | 111.6098  | 113.8894  |
| Frequencies -- | 114.8911  | 118.5225  | 120.8219  |
| Frequencies -- | 124.0017  | 128.8812  | 133.8114  |
| Frequencies -- | 134.6201  | 138.4915  | 144.3067  |
| Frequencies -- | 148.6228  | 156.9647  | 159.0709  |
| Frequencies -- | 161.5201  | 166.1481  | 168.2470  |
| Frequencies -- | 171.0382  | 191.9504  | 213.9870  |
| Frequencies -- | 217.8146  | 219.5532  | 225.6653  |
| Frequencies -- | 243.7829  | 255.8402  | 263.8569  |
| Frequencies -- | 264.6113  | 264.8134  | 275.7345  |
| Frequencies -- | 277.3506  | 278.6203  | 285.0862  |
| Frequencies -- | 289.0979  | 297.0978  | 298.6203  |
| Frequencies -- | 302.6877  | 304.5025  | 305.9553  |
| Frequencies -- | 312.8248  | 324.6595  | 331.7702  |
| Frequencies -- | 337.7783  | 353.7213  | 359.3397  |
| Frequencies -- | 363.1423  | 373.7350  | 375.6442  |
| Frequencies -- | 377.4300  | 379.9294  | 380.6381  |
| Frequencies -- | 394.1889  | 399.0642  | 403.7300  |
| Frequencies -- | 415.7280  | 417.6436  | 431.2612  |
| Frequencies -- | 432.3651  | 443.0518  | 450.5736  |
| Frequencies -- | 456.1220  | 458.7334  | 466.8984  |
| Frequencies -- | 484.0805  | 513.9639  | 534.0229  |
| Frequencies -- | 536.4336  | 539.2568  | 540.9781  |
| Frequencies -- | 546.8875  | 554.5167  | 564.3079  |
| Frequencies -- | 576.9797  | 580.8869  | 592.7101  |
| Frequencies -- | 601.3314  | 603.4188  | 609.0207  |
| Frequencies -- | 624.4954  | 633.0222  | 634.1064  |
| Frequencies -- | 635.8878  | 641.7848  | 656.7429  |
| Frequencies -- | 671.4695  | 702.4298  | 703.7524  |
| Frequencies -- | 716.7941  | 729.5108  | 735.4130  |
| Frequencies -- | 745.7917  | 746.8514  | 766.0831  |
| Frequencies -- | 790.7587  | 799.1326  | 802.7188  |
| Frequencies -- | 806.1500  | 822.1947  | 830.4840  |
| Frequencies -- | 843.0854  | 863.4543  | 872.0679  |
| Frequencies -- | 906.2305  | 911.2452  | 917.4994  |
| Frequencies -- | 945.4605  | 958.3107  | 966.1726  |
| Frequencies -- | 968.8163  | 972.0152  | 1004.2428 |
| Frequencies -- | 1013.0054 | 1022.3070 | 1032.0845 |
| Frequencies -- | 1039.8217 | 1043.5855 | 1044.1357 |
| Frequencies -- | 1045.3866 | 1046.3574 | 1048.8666 |
| Frequencies -- | 1049.8485 | 1056.1815 | 1085.4492 |
| Frequencies -- | 1087.6586 | 1094.1175 | 1111.8540 |
| Frequencies -- | 1124.4092 | 1168.5138 | 1173.3838 |
| Frequencies -- | 1173.6633 | 1201.8561 | 1203.1570 |
| Frequencies -- | 1209.4836 | 1213.8214 | 1254.8895 |
| Frequencies -- | 1294.6720 | 1303.3776 | 1314.0964 |
| Frequencies -- | 1321.5026 | 1338.1496 | 1344.5049 |
| Frequencies -- | 1349.1527 | 1360.2781 | 1382.7565 |
| Frequencies -- | 1409.2449 | 1412.1013 | 1413.3788 |
| Frequencies -- | 1416.9190 | 1421.1805 | 1422.2156 |
| Frequencies -- | 1423.4300 | 1427.0218 | 1427.0967 |
| Frequencies -- | 1430.0011 | 1434.6697 | 1447.5876 |
| Frequencies -- | 1451.5147 | 1462.0408 | 1466.4077 |
| Frequencies -- | 1469.4784 | 1471.3343 | 1480.2242 |
| Frequencies -- | 1488.0774 | 1490.0306 | 1495.3218 |
| Frequencies -- | 1495.8637 | 1496.3587 | 1504.3971 |
| Frequencies -- | 1505.5121 | 1508.9371 | 1512.1503 |
| Frequencies -- | 1519.6033 | 1590.1040 | 1593.1900 |

|                |           |           |           |
|----------------|-----------|-----------|-----------|
| Frequencies -- | 1597.0954 | 1600.8362 | 1616.7853 |
| Frequencies -- | 1618.5062 | 1621.2304 | 1630.2789 |
| Frequencies -- | 3010.1314 | 3010.7849 | 3011.7252 |
| Frequencies -- | 3012.4993 | 3013.7305 | 3025.7729 |
| Frequencies -- | 3099.1712 | 3099.9904 | 3101.8018 |
| Frequencies -- | 3103.7066 | 3106.5557 | 3135.9238 |
| Frequencies -- | 3138.5577 | 3140.6709 | 3143.7265 |
| Frequencies -- | 3146.6075 | 3152.7792 | 3195.5686 |
| Frequencies -- | 3198.1956 | 3215.6981 | 3219.3041 |

**Catalyst 6:**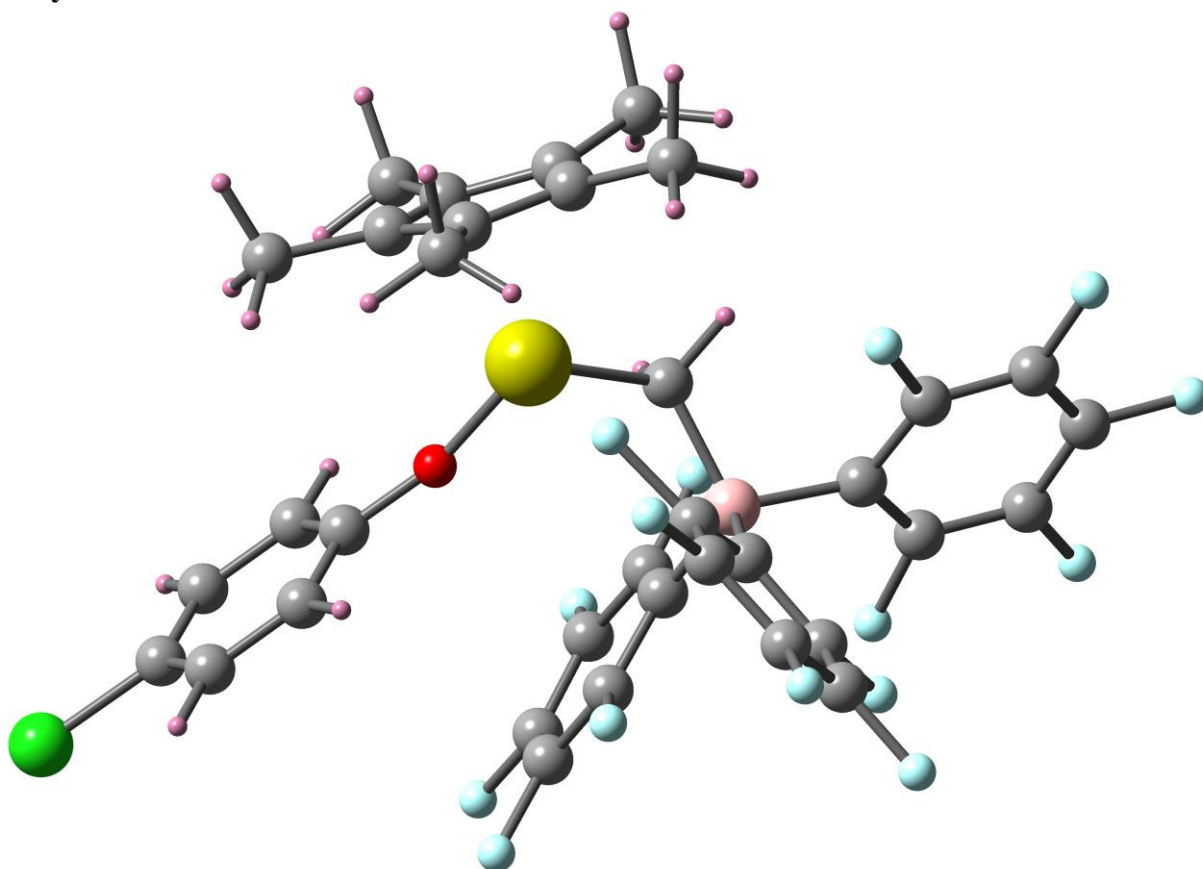

| <b>vacuum</b> | <b>toluene-like solvent</b> | <b>D3 dispersion</b> |
|---------------|-----------------------------|----------------------|
| -3016.2787222 | -3016.290322                | -0.53197437          |

|    |             |             |             |
|----|-------------|-------------|-------------|
| Ti | -0.92507400 | 1.86345200  | -0.64028300 |
| O  | -2.24586800 | 0.70172900  | -0.29794800 |
| C  | -3.45962500 | 0.08270200  | -0.05303000 |
| C  | -4.02675000 | 0.14001300  | 1.24352600  |
| C  | -4.11321800 | -0.62443400 | -1.09123800 |
| C  | -5.25624500 | -0.49840100 | 1.49758600  |
| C  | -5.34461900 | -1.26003000 | -0.83742000 |
| C  | -5.90729200 | -1.18778000 | 0.45363900  |
| H  | -5.69240600 | -0.46738700 | 2.49574600  |
| H  | -5.84833700 | -1.81311200 | -1.62988100 |
| C  | -0.29111400 | 3.34385400  | -2.46387500 |
| C  | -1.70859500 | 3.01951400  | -2.53849900 |
| C  | -0.07625600 | 4.08444000  | -1.24942400 |
| C  | -2.37192200 | 3.61806100  | -1.39721600 |
| C  | -1.35862000 | 4.24326900  | -0.58239300 |
| F  | 2.16042200  | 1.50925000  | 5.48043900  |
| C  | 1.92089300  | 1.06474900  | 4.19114700  |
| C  | 2.46774700  | -0.14945900 | 3.73222100  |
| C  | 1.12016800  | 1.81234400  | 3.31479100  |
| C  | 2.21487800  | -0.58053400 | 2.41679300  |



|    |             |             |             |
|----|-------------|-------------|-------------|
| F  | 3.24310200  | -0.91297500 | 4.59110500  |
| C  | 0.92159000  | 1.30806900  | 2.01901000  |
| F  | 0.54523400  | 3.01166600  | 3.72181400  |
| C  | 1.43069000  | 0.13180100  | 1.47040100  |
| F  | 2.75511200  | -1.81710500 | 2.07039700  |
| F  | 0.04269800  | 2.16647700  | 1.22737400  |
| B  | 1.23712100  | -0.41812500 | -0.10903000 |
| C  | 2.81081200  | -0.73927000 | -0.61596300 |
| C  | 0.21366100  | -1.72784400 | -0.18601000 |
| C  | 0.65688500  | 0.74019700  | -1.21185300 |
| C  | 3.35948200  | -2.00399200 | -0.94023200 |
| C  | 3.75203100  | 0.31192200  | -0.73935400 |
| C  | -0.57356000 | -2.23584100 | 0.87120400  |
| C  | -0.01183000 | -2.41120400 | -1.40765800 |
| H  | 1.47004200  | 1.40054000  | -1.53038200 |
| H  | 0.30709800  | 0.19797600  | -2.10922800 |
| C  | 4.67534400  | -2.20462700 | -1.40659500 |
| F  | 2.61769500  | -3.17486400 | -0.76764400 |
| C  | 5.07614000  | 0.16673000  | -1.19120700 |
| F  | 3.39524600  | 1.62622100  | -0.36362400 |
| C  | -1.46014300 | -3.32696800 | 0.76244200  |
| F  | -0.54619500 | -1.63836100 | 2.14440000  |
| C  | -0.88394200 | -3.50075700 | -1.57416300 |
| F  | 0.67877600  | -2.01754900 | -2.56676500 |
| C  | 5.54343100  | -1.10963000 | -1.54426000 |
| F  | 5.12887200  | -3.48171500 | -1.71505300 |
| F  | 5.92165900  | 1.26893700  | -1.28740100 |
| C  | -1.61641800 | -3.97325900 | -0.47214900 |
| F  | -2.19958600 | -3.74921100 | 1.86213000  |
| F  | -1.03294900 | -4.11146300 | -2.81576300 |
| F  | 6.84117500  | -1.28533800 | -2.00251600 |
| F  | -2.49365900 | -5.03961300 | -0.61011500 |
| C  | -3.86223000 | 3.65664200  | -1.15113200 |
| H  | -4.11614100 | 3.63513400  | -0.08221500 |
| H  | -4.28248400 | 4.58933800  | -1.56584700 |
| H  | -4.38786900 | 2.82227700  | -1.63186800 |
| C  | -2.38469300 | 2.34192300  | -3.71017000 |
| H  | -3.33474100 | 1.86917900  | -3.42960000 |
| H  | -2.61114100 | 3.08516000  | -4.49433100 |
| H  | -1.74825100 | 1.57351300  | -4.17120100 |
| C  | 0.72099000  | 3.10539700  | -3.55821800 |
| H  | 0.57331600  | 2.14328100  | -4.06736000 |
| H  | 0.63414800  | 3.89759100  | -4.32203200 |
| H  | 1.75206200  | 3.12879100  | -3.18326300 |
| C  | 1.23711300  | 4.66967000  | -0.78418300 |
| H  | 2.09320900  | 4.02599600  | -1.02447400 |
| H  | 1.41049900  | 5.64164700  | -1.27828300 |
| H  | 1.24967200  | 4.85243600  | 0.29829800  |
| C  | -1.59621700 | 5.02135400  | 0.69327100  |
| H  | -0.80459900 | 4.86317100  | 1.43855800  |
| H  | -1.62217800 | 6.10274500  | 0.47448900  |
| H  | -2.55445000 | 4.76418400  | 1.16450800  |
| H  | -3.50481400 | 0.66107400  | 2.04639200  |
| H  | -3.65754500 | -0.68705000 | -2.07937000 |
| Cl | -7.50717300 | -1.99803500 | 0.77756300  |

Frequencies --

7.0078

16.2819

16.8661

|                |           |           |           |
|----------------|-----------|-----------|-----------|
| Frequencies -- | 24.0763   | 26.4575   | 30.0300   |
| Frequencies -- | 32.2318   | 33.8377   | 37.7406   |
| Frequencies -- | 40.7300   | 47.5068   | 56.1943   |
| Frequencies -- | 74.2509   | 77.8219   | 85.6340   |
| Frequencies -- | 91.8495   | 100.3199  | 101.8330  |
| Frequencies -- | 103.2767  | 110.5162  | 111.6137  |
| Frequencies -- | 116.1176  | 117.4915  | 120.8889  |
| Frequencies -- | 123.5740  | 128.0172  | 131.0021  |
| Frequencies -- | 135.2513  | 137.2077  | 144.7272  |
| Frequencies -- | 149.2571  | 156.9731  | 158.5730  |
| Frequencies -- | 161.5158  | 164.6978  | 168.2944  |
| Frequencies -- | 173.0490  | 182.1036  | 210.2348  |
| Frequencies -- | 217.1344  | 219.7725  | 224.5163  |
| Frequencies -- | 233.3845  | 253.5122  | 264.1192  |
| Frequencies -- | 264.4973  | 265.1686  | 265.8367  |
| Frequencies -- | 273.5522  | 275.8349  | 278.8725  |
| Frequencies -- | 280.1741  | 292.1257  | 295.7316  |
| Frequencies -- | 299.4471  | 302.5614  | 303.0353  |
| Frequencies -- | 306.4486  | 314.8477  | 324.0600  |
| Frequencies -- | 331.9904  | 335.9559  | 338.6219  |
| Frequencies -- | 355.7383  | 364.9926  | 374.5133  |
| Frequencies -- | 376.7895  | 379.6138  | 380.6075  |
| Frequencies -- | 388.3357  | 397.3693  | 402.8148  |
| Frequencies -- | 410.9182  | 416.9641  | 431.3448  |
| Frequencies -- | 431.8925  | 441.7709  | 445.3057  |
| Frequencies -- | 449.5555  | 458.5234  | 462.5679  |
| Frequencies -- | 468.1329  | 484.5046  | 514.5500  |
| Frequencies -- | 534.0150  | 536.9624  | 539.5426  |
| Frequencies -- | 542.4573  | 547.5977  | 555.5573  |
| Frequencies -- | 568.9603  | 580.6924  | 589.9019  |
| Frequencies -- | 601.9644  | 604.6354  | 612.5412  |
| Frequencies -- | 624.2969  | 628.6353  | 634.8113  |
| Frequencies -- | 636.5719  | 641.5168  | 647.0874  |
| Frequencies -- | 655.9223  | 671.9636  | 701.3686  |
| Frequencies -- | 704.5660  | 717.6796  | 730.5103  |
| Frequencies -- | 736.3069  | 746.9879  | 747.9178  |
| Frequencies -- | 766.2039  | 778.8577  | 784.5717  |
| Frequencies -- | 799.9168  | 803.3563  | 825.3756  |
| Frequencies -- | 839.1485  | 867.8739  | 873.8970  |
| Frequencies -- | 906.3782  | 911.1275  | 916.8261  |
| Frequencies -- | 932.6410  | 946.6881  | 967.5276  |
| Frequencies -- | 971.0957  | 978.4935  | 1006.8919 |
| Frequencies -- | 1012.3488 | 1022.9150 | 1033.4240 |
| Frequencies -- | 1041.1655 | 1043.3370 | 1044.2975 |
| Frequencies -- | 1045.2987 | 1046.3392 | 1048.7466 |
| Frequencies -- | 1050.1995 | 1056.3275 | 1075.9393 |
| Frequencies -- | 1086.8846 | 1089.6346 | 1110.3501 |
| Frequencies -- | 1115.4444 | 1125.0402 | 1173.5544 |
| Frequencies -- | 1174.1408 | 1189.9433 | 1202.7073 |
| Frequencies -- | 1209.6613 | 1213.5530 | 1250.3051 |
| Frequencies -- | 1295.6030 | 1308.6659 | 1314.1534 |
| Frequencies -- | 1320.3038 | 1337.9828 | 1344.3494 |
| Frequencies -- | 1348.5087 | 1352.8720 | 1387.2207 |
| Frequencies -- | 1409.3796 | 1412.5721 | 1414.0375 |
| Frequencies -- | 1415.0000 | 1416.3786 | 1421.0200 |
| Frequencies -- | 1423.8918 | 1425.6916 | 1427.1637 |
| Frequencies -- | 1431.0380 | 1434.1464 | 1448.4017 |
| Frequencies -- | 1451.6218 | 1463.1515 | 1466.8100 |
| Frequencies -- | 1470.0403 | 1471.8592 | 1480.3629 |
| Frequencies -- | 1485.6604 | 1489.3155 | 1493.0528 |
| Frequencies -- | 1495.6550 | 1498.1950 | 1505.6082 |
| Frequencies -- | 1505.9061 | 1510.0001 | 1514.0252 |
| Frequencies -- | 1519.1872 | 1583.1525 | 1590.0688 |

|                |           |           |           |
|----------------|-----------|-----------|-----------|
| Frequencies -- | 1593.4778 | 1597.0774 | 1605.4279 |
| Frequencies -- | 1616.8865 | 1621.7252 | 1630.7113 |
| Frequencies -- | 3010.7564 | 3011.5759 | 3012.7473 |
| Frequencies -- | 3013.1382 | 3014.3441 | 3022.5516 |
| Frequencies -- | 3099.9241 | 3100.5892 | 3102.8486 |
| Frequencies -- | 3103.8271 | 3107.6747 | 3136.7132 |
| Frequencies -- | 3139.5224 | 3143.7216 | 3146.8881 |
| Frequencies -- | 3149.7120 | 3153.7476 | 3193.3484 |
| Frequencies -- | 3195.9683 | 3212.2894 | 3216.2377 |

**Catalyst 7:**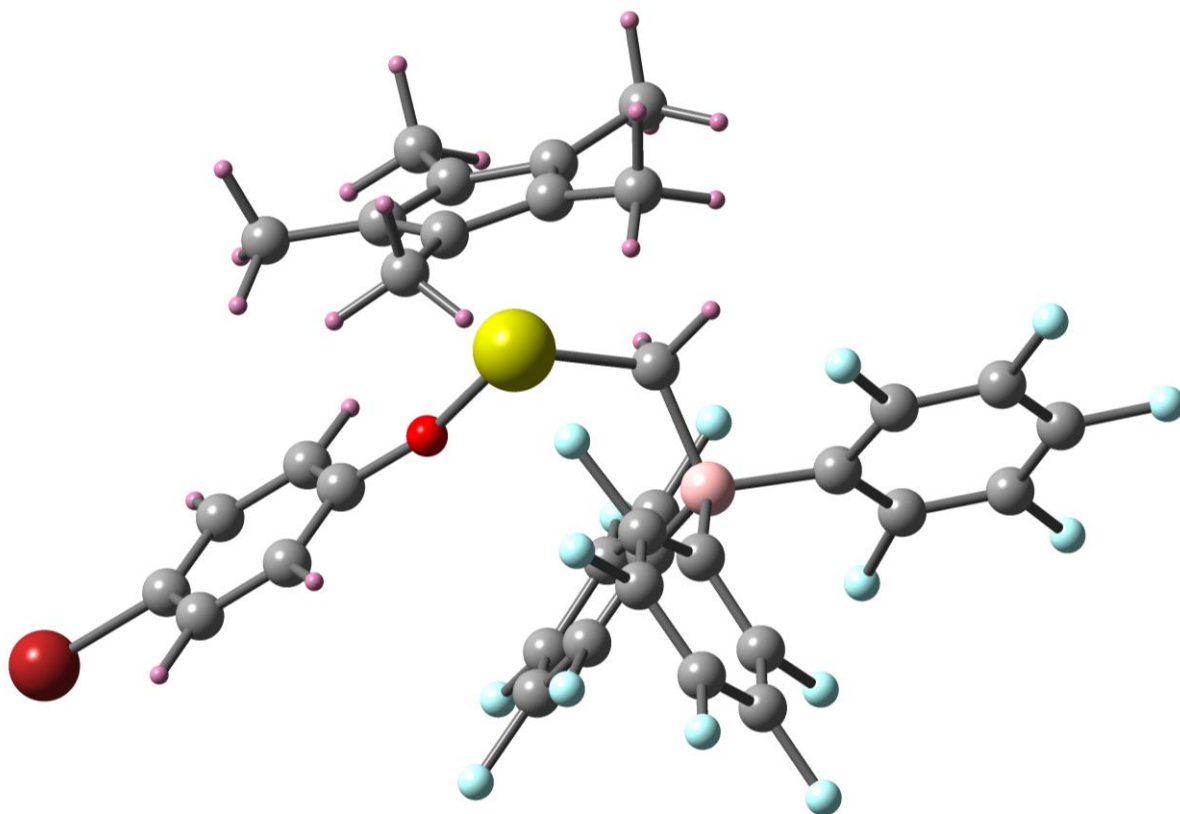

| <b>vacuum</b> | <b>toluene-like solvent</b> | <b>D3 dispersion</b> |
|---------------|-----------------------------|----------------------|
| -3014.482553  | -3014.4940513               | -0.53320764          |

|    |             |             |             |
|----|-------------|-------------|-------------|
| Ti | -0.37578100 | 2.02289700  | -0.64476500 |
| O  | -1.80974500 | 0.98892400  | -0.35589800 |
| C  | -3.08495100 | 0.49015500  | -0.15453900 |
| C  | -3.68393500 | 0.58412900  | 1.12490900  |
| C  | -3.77683400 | -0.13511600 | -1.21946900 |
| C  | -4.97666700 | 0.06577800  | 1.33596500  |
| C  | -5.07096300 | -0.65184200 | -1.01106300 |
| C  | -5.66505700 | -0.54189400 | 0.26422600  |
| H  | -5.43104800 | 0.13147300  | 2.32446300  |
| H  | -5.59821000 | -1.13809100 | -1.83175000 |
| C  | 0.44498000  | 3.48357100  | -2.40958700 |
| C  | -0.99081500 | 3.28283300  | -2.54227100 |
| C  | 0.67618900  | 4.17487000  | -1.16919200 |
| C  | -1.64371500 | 3.90836000  | -1.40984400 |
| C  | -0.61226500 | 4.42475900  | -0.54300800 |
| F  | 2.28378100  | 1.10211200  | 5.59624800  |
| C  | 2.08000700  | 0.74369300  | 4.27433000  |
| C  | 2.50094200  | -0.51146000 | 3.79300700  |
| C  | 1.44207100  | 1.62238000  | 3.38607300  |
| C  | 2.28663000  | -0.85365400 | 2.44513500  |
| F  | 3.11400900  | -1.40161800 | 4.66110600  |
| C  | 1.27089200  | 1.19958500  | 2.05755800  |

|    |             |             |             |
|----|-------------|-------------|-------------|
| F  | 0.99658000  | 2.86883000  | 3.81305500  |
| C  | 1.66336900  | -0.01025400 | 1.48681300  |
| F  | 2.69357200  | -2.13267500 | 2.07179800  |
| F  | 0.57015200  | 2.19717400  | 1.25082400  |
| B  | 1.51797200  | -0.47320900 | -0.12623200 |
| C  | 3.08985700  | -0.91007800 | -0.54424900 |
| C  | 0.39452100  | -1.68566600 | -0.31976200 |
| C  | 1.10072600  | 0.76467800  | -1.21565400 |
| C  | 3.55543000  | -2.20475800 | -0.87995200 |
| C  | 4.11883500  | 0.06308100  | -0.56210400 |
| C  | -0.51119500 | -2.14931100 | 0.66011400  |
| C  | 0.20184700  | -2.31185400 | -1.57716200 |
| H  | 1.98498700  | 1.34736900  | -1.49547100 |
| H  | 0.72595100  | 0.28287100  | -2.13683400 |
| C  | 4.88089600  | -2.49820100 | -1.26242900 |
| F  | 2.71035100  | -3.31431200 | -0.80692500 |
| C  | 5.45575200  | -0.17661300 | -0.92766500 |
| F  | 3.84135700  | 1.38855200  | -0.16001100 |
| C  | -1.47643500 | -3.15585600 | 0.45228300  |
| F  | -0.53043500 | -1.58686800 | 1.94914300  |
| C  | -0.74467100 | -3.31689100 | -1.84150300 |
| F  | 1.00443800  | -1.94529500 | -2.67099100 |
| C  | 5.84215800  | -1.47526500 | -1.29720800 |
| F  | 5.25106500  | -3.79731500 | -1.58954300 |
| F  | 6.39263800  | 0.85360500  | -0.92243800 |
| C  | -1.59404300 | -3.75347800 | -0.81084600 |
| F  | -2.32907800 | -3.54086500 | 1.48136200  |
| F  | -0.85106500 | -3.88012400 | -3.10956500 |
| F  | 7.15089200  | -1.74341700 | -1.67177700 |
| F  | -2.54434700 | -4.73731900 | -1.04587900 |
| C  | -3.13320600 | 4.08012500  | -1.22081600 |
| H  | -3.43169100 | 4.06910600  | -0.16341100 |
| H  | -3.44694800 | 5.05392600  | -1.63547900 |
| H  | -3.71526700 | 3.30602500  | -1.73638700 |
| C  | -1.67489200 | 2.69003700  | -3.75433400 |
| H  | -2.68390900 | 2.32200300  | -3.52783800 |
| H  | -1.77846500 | 3.45838300  | -4.54020600 |
| H  | -1.10255100 | 1.85995200  | -4.19242300 |
| C  | 1.47138500  | 3.18540700  | -3.47571200 |
| H  | 1.26302900  | 2.24988400  | -4.01240000 |
| H  | 1.47577600  | 3.99802400  | -4.22276300 |
| H  | 2.48747200  | 3.11563000  | -3.06735100 |
| C  | 2.01462300  | 4.63687200  | -0.64103200 |
| H  | 2.83201900  | 3.95926600  | -0.91850100 |
| H  | 2.25791800  | 5.63093700  | -1.05525600 |
| H  | 2.01920700  | 4.73417600  | 0.45280500  |
| C  | -0.83188400 | 5.18731400  | 0.74500000  |
| H  | -0.05737600 | 4.97840600  | 1.49554000  |
| H  | -0.80724200 | 6.27316800  | 0.54876500  |
| H  | -1.80655900 | 4.96366200  | 1.19988500  |
| H  | -3.13814400 | 1.04020000  | 1.95126600  |
| H  | -3.30206100 | -0.22960100 | -2.19622900 |
| Br | -7.47126600 | -1.25436200 | 0.55397200  |

|                |         |         |         |
|----------------|---------|---------|---------|
| Frequencies -- | 6.3819  | 11.2478 | 13.9002 |
| Frequencies -- | 23.1930 | 25.7724 | 26.3256 |
| Frequencies -- | 30.2293 | 33.5112 | 36.2972 |

|                |           |           |           |
|----------------|-----------|-----------|-----------|
| Frequencies -- | 40.0520   | 48.3631   | 56.1679   |
| Frequencies -- | 68.7395   | 72.8770   | 74.0021   |
| Frequencies -- | 82.5719   | 97.5571   | 99.0844   |
| Frequencies -- | 105.8110  | 111.2186  | 112.1715  |
| Frequencies -- | 117.6091  | 120.1851  | 123.2762  |
| Frequencies -- | 127.5081  | 131.4446  | 136.5013  |
| Frequencies -- | 138.2032  | 140.3487  | 144.4399  |
| Frequencies -- | 148.7674  | 155.4804  | 158.6186  |
| Frequencies -- | 160.5807  | 164.4024  | 168.1868  |
| Frequencies -- | 169.5554  | 184.8410  | 207.0770  |
| Frequencies -- | 214.6389  | 218.6621  | 224.2291  |
| Frequencies -- | 230.2065  | 242.3034  | 244.0507  |
| Frequencies -- | 247.2430  | 263.9427  | 264.4739  |
| Frequencies -- | 265.1388  | 276.0734  | 277.4824  |
| Frequencies -- | 279.0371  | 289.8813  | 293.0113  |
| Frequencies -- | 298.7784  | 302.5325  | 303.0648  |
| Frequencies -- | 305.6459  | 313.9037  | 323.3985  |
| Frequencies -- | 331.6065  | 338.5589  | 353.8524  |
| Frequencies -- | 355.5832  | 364.9141  | 371.1929  |
| Frequencies -- | 374.9225  | 376.9641  | 379.3454  |
| Frequencies -- | 383.3397  | 393.5844  | 400.7101  |
| Frequencies -- | 410.8128  | 417.6391  | 419.2195  |
| Frequencies -- | 431.2780  | 432.3771  | 442.3502  |
| Frequencies -- | 447.6451  | 454.6310  | 458.8188  |
| Frequencies -- | 467.4902  | 494.2886  | 513.6604  |
| Frequencies -- | 533.8563  | 536.4290  | 539.2186  |
| Frequencies -- | 541.3511  | 547.2476  | 555.3153  |
| Frequencies -- | 568.5459  | 580.1642  | 589.5987  |
| Frequencies -- | 600.4507  | 603.4224  | 609.6132  |
| Frequencies -- | 623.7751  | 628.1827  | 634.2913  |
| Frequencies -- | 636.3334  | 640.9695  | 655.0777  |
| Frequencies -- | 670.0181  | 692.4368  | 696.2970  |
| Frequencies -- | 703.6481  | 716.9603  | 729.9704  |
| Frequencies -- | 735.1380  | 745.9927  | 747.0119  |
| Frequencies -- | 765.7967  | 800.4468  | 802.6654  |
| Frequencies -- | 816.3564  | 821.5661  | 829.0012  |
| Frequencies -- | 841.3002  | 862.6681  | 872.0632  |
| Frequencies -- | 906.3855  | 910.7211  | 920.0870  |
| Frequencies -- | 951.2831  | 966.1758  | 968.2079  |
| Frequencies -- | 969.1737  | 971.0661  | 1004.5321 |
| Frequencies -- | 1015.0743 | 1022.3475 | 1031.2941 |
| Frequencies -- | 1039.5288 | 1042.7697 | 1043.7401 |
| Frequencies -- | 1044.3894 | 1046.8613 | 1047.3486 |
| Frequencies -- | 1049.5619 | 1055.5519 | 1064.8663 |
| Frequencies -- | 1086.9119 | 1088.2912 | 1093.1047 |
| Frequencies -- | 1115.1329 | 1124.7718 | 1173.1752 |
| Frequencies -- | 1173.7569 | 1191.5991 | 1202.6160 |
| Frequencies -- | 1209.3432 | 1213.3602 | 1250.7269 |
| Frequencies -- | 1295.0306 | 1305.7015 | 1314.0430 |
| Frequencies -- | 1320.2744 | 1338.2768 | 1344.1540 |
| Frequencies -- | 1348.5660 | 1349.0210 | 1382.7723 |
| Frequencies -- | 1407.1240 | 1409.2118 | 1412.4236 |
| Frequencies -- | 1414.0995 | 1416.4953 | 1421.1810 |
| Frequencies -- | 1423.5582 | 1424.6741 | 1428.8540 |
| Frequencies -- | 1429.6884 | 1434.3222 | 1447.9391 |
| Frequencies -- | 1451.6457 | 1461.6937 | 1466.4550 |
| Frequencies -- | 1469.7899 | 1471.7928 | 1479.8335 |
| Frequencies -- | 1480.2374 | 1489.6596 | 1491.1923 |
| Frequencies -- | 1495.8843 | 1498.3386 | 1504.6581 |
| Frequencies -- | 1505.2251 | 1510.7920 | 1513.6175 |
| Frequencies -- | 1519.2070 | 1578.8310 | 1589.9736 |
| Frequencies -- | 1593.5498 | 1596.9672 | 1599.4557 |
| Frequencies -- | 1616.8114 | 1621.4729 | 1630.6087 |

|                |           |           |           |
|----------------|-----------|-----------|-----------|
| Frequencies -- | 3009.8962 | 3010.9354 | 3011.6876 |
| Frequencies -- | 3012.4317 | 3013.5793 | 3022.9515 |
| Frequencies -- | 3098.2731 | 3100.4865 | 3102.5336 |
| Frequencies -- | 3103.6641 | 3105.7541 | 3136.3944 |
| Frequencies -- | 3138.5554 | 3143.2307 | 3144.9388 |
| Frequencies -- | 3147.0618 | 3149.9591 | 3190.3032 |
| Frequencies -- | 3193.2532 | 3208.8487 | 3213.2422 |

**Catalyst 8:**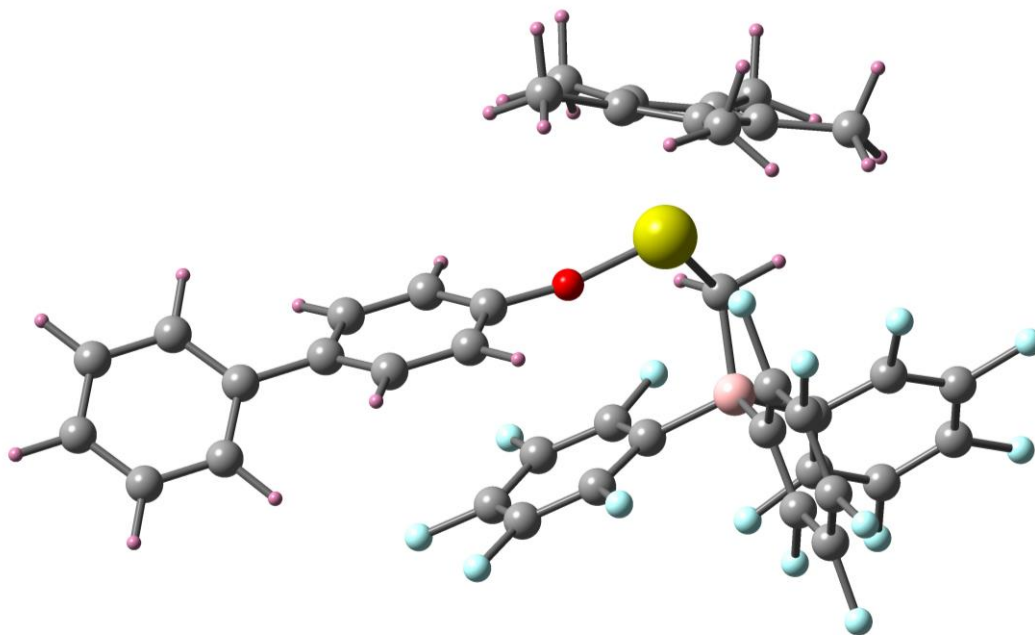

| <b>vacuum</b> | <b>toluene-like solvent</b> | <b>D3 dispersion</b> |
|---------------|-----------------------------|----------------------|
| -3232.8751765 | -3232.887857                | -0.59947719          |

|    |             |             |             |
|----|-------------|-------------|-------------|
| Ti | 0.01801600  | 2.15660200  | -0.56035100 |
| O  | -1.51489700 | 1.26229900  | -0.35998100 |
| C  | -2.82869400 | 0.84627400  | -0.20841300 |
| C  | -3.42091200 | 0.83919600  | 1.07654100  |
| C  | -3.56744800 | 0.39756600  | -1.32865800 |
| C  | -4.74235600 | 0.38521500  | 1.23137100  |
| C  | -4.89049400 | -0.04833100 | -1.15856100 |
| C  | -5.50985200 | -0.06687400 | 0.12199800  |
| H  | -5.18811400 | 0.40021000  | 2.22672400  |
| H  | -5.43221800 | -0.42468300 | -2.02726100 |
| C  | 1.34364500  | 4.18671900  | -1.01217800 |
| C  | 0.98078200  | 3.59880400  | -2.27299200 |
| C  | 0.12197000  | 4.56639100  | -0.32093700 |
| C  | -0.47356900 | 3.59462200  | -2.35659200 |
| C  | -0.99833400 | 4.23597700  | -1.16815700 |
| F  | 2.39977400  | 0.62228000  | 5.67668800  |
| C  | 2.19869600  | 0.35993400  | 4.33166500  |
| C  | 2.50632900  | -0.90256500 | 3.78806200  |
| C  | 1.67673300  | 1.34623500  | 3.48157900  |
| C  | 2.29730700  | -1.14600200 | 2.41818200  |
| F  | 3.00320200  | -1.89678900 | 4.61718200  |
| C  | 1.50063200  | 1.01721700  | 2.12729400  |
| F  | 1.34687800  | 2.60600400  | 3.97049800  |
| C  | 1.78710300  | -0.19280700 | 1.49669700  |
| F  | 2.58643400  | -2.43681900 | 1.98015300  |
| F  | 0.92722800  | 2.12312900  | 1.36502900  |
| B  | 1.64350300  | -0.54864000 | -0.14374200 |
| C  | 3.18299600  | -1.10315500 | -0.54748500 |



|   |              |             |             |
|---|--------------|-------------|-------------|
| C | 0.42275400   | -1.64253400 | -0.43073300 |
| C | 1.37061400   | 0.77734600  | -1.17160500 |
| C | 3.54410700   | -2.41415200 | -0.94290900 |
| C | 4.29319500   | -0.22562000 | -0.48754700 |
| C | -0.54982100  | -2.07226100 | 0.49907800  |
| C | 0.21382700   | -2.18237700 | -1.72492600 |
| H | 2.31291400   | 1.28374300  | -1.40801800 |
| H | 0.96612600   | 0.38425900  | -2.12164700 |
| C | 4.84947000   | -2.80258100 | -1.31022700 |
| F | 2.60472300   | -3.44756200 | -0.95150400 |
| C | 5.61376400   | -0.56184200 | -0.83600900 |
| F | 4.12201800   | 1.09544200  | -0.01790500 |
| C | -1.59534300  | -2.97335300 | 0.21147800  |
| F | -0.55406000  | -1.58180300 | 1.81731200  |
| C | -0.81028500  | -3.08218000 | -2.06760300 |
| F | 1.07936400   | -1.83424600 | -2.77572200 |
| C | 5.89636900   | -1.86788600 | -1.26761900 |
| F | 5.11484500   | -4.11046300 | -1.69934900 |
| F | 6.63560900   | 0.38088500  | -0.75358300 |
| C | -1.72700600  | -3.49182500 | -1.08473400 |
| F | -2.51072900  | -3.33241000 | 1.19593700  |
| F | -0.92731200  | -3.56825900 | -3.36643100 |
| F | 7.18680200   | -2.22987900 | -1.62738900 |
| F | -2.75294100  | -4.37301000 | -1.39712800 |
| C | -1.27146800  | 3.17825500  | -3.57269300 |
| H | -2.30886300  | 2.92168500  | -3.32362400 |
| H | -1.30626500  | 4.00806400  | -4.29995300 |
| H | -0.82513600  | 2.31748200  | -4.09055300 |
| C | 1.92012800   | 3.22135100  | -3.39341500 |
| H | 1.58947300   | 2.32642700  | -3.93822400 |
| H | 1.97750500   | 4.04721200  | -4.12352400 |
| H | 2.94001500   | 3.03457500  | -3.03485600 |
| C | 2.74683400   | 4.44554700  | -0.51449800 |
| H | 3.46817500   | 3.70839600  | -0.88798700 |
| H | 3.08740900   | 5.44023200  | -0.85194300 |
| H | 2.80711800   | 4.44083600  | 0.58226600  |
| C | 0.05400200   | 5.28752200  | 1.00716400  |
| H | 0.81600500   | 4.93653900  | 1.71612700  |
| H | 0.22512400   | 6.36752200  | 0.85689300  |
| H | -0.92602500  | 5.17987800  | 1.49160900  |
| C | -2.44796500  | 4.57166700  | -0.90322800 |
| H | -2.68717300  | 4.58985200  | 0.16889300  |
| H | -2.67656400  | 5.57469200  | -1.30378200 |
| H | -3.13689100  | 3.86514000  | -1.38304200 |
| H | -2.84624800  | 1.17381300  | 1.94083500  |
| H | -3.09786200  | 0.37266800  | -2.31248900 |
| C | -6.91025100  | -0.55903000 | 0.29868800  |
| C | -7.91828400  | -0.27112500 | -0.66215600 |
| C | -7.27448000  | -1.33611000 | 1.43286500  |
| C | -9.23784000  | -0.73892900 | -0.49586800 |
| H | -7.67826200  | 0.34507400  | -1.53083300 |
| C | -8.59288700  | -1.80642000 | 1.59953600  |
| H | -6.51621400  | -1.60630000 | 2.16997000  |
| C | -9.58268800  | -1.50976000 | 0.63648000  |
| H | -9.99573700  | -0.49662500 | -1.24464700 |
| H | -8.84311700  | -2.41320400 | 2.47289400  |
| H | -10.60408400 | -1.87513600 | 0.76474200  |

|                |           |           |           |
|----------------|-----------|-----------|-----------|
| Frequencies -- | 7.9634    | 12.6787   | 15.0176   |
| Frequencies -- | 23.7477   | 25.3108   | 26.2520   |
| Frequencies -- | 31.4801   | 34.5817   | 36.8461   |
| Frequencies -- | 39.6120   | 47.9525   | 53.2568   |
| Frequencies -- | 60.2494   | 65.9691   | 72.2381   |
| Frequencies -- | 76.1622   | 93.5556   | 96.5216   |
| Frequencies -- | 98.5324   | 104.6064  | 111.0782  |
| Frequencies -- | 113.8220  | 116.2464  | 118.1607  |
| Frequencies -- | 122.6688  | 124.7403  | 125.2985  |
| Frequencies -- | 129.8752  | 133.7364  | 139.2167  |
| Frequencies -- | 144.9060  | 148.6966  | 150.2309  |
| Frequencies -- | 158.0611  | 161.1518  | 163.4416  |
| Frequencies -- | 164.9125  | 166.7201  | 169.5638  |
| Frequencies -- | 174.1979  | 198.2041  | 215.1206  |
| Frequencies -- | 218.5993  | 221.9066  | 225.7705  |
| Frequencies -- | 241.2320  | 249.0004  | 263.9747  |
| Frequencies -- | 264.8356  | 265.0057  | 266.3900  |
| Frequencies -- | 276.1047  | 278.1938  | 279.3144  |
| Frequencies -- | 287.4810  | 293.1170  | 296.8321  |
| Frequencies -- | 303.0381  | 304.1608  | 306.2610  |
| Frequencies -- | 314.1189  | 323.2395  | 331.7478  |
| Frequencies -- | 335.8232  | 340.0883  | 356.1081  |
| Frequencies -- | 364.3700  | 370.0157  | 375.1999  |
| Frequencies -- | 377.2602  | 379.2255  | 383.3041  |
| Frequencies -- | 390.5253  | 398.3590  | 405.8818  |
| Frequencies -- | 407.6752  | 413.8171  | 416.6773  |
| Frequencies -- | 418.6182  | 431.3597  | 432.5946  |
| Frequencies -- | 443.5956  | 454.0266  | 458.2608  |
| Frequencies -- | 461.3970  | 467.8456  | 496.8555  |
| Frequencies -- | 514.1164  | 534.2184  | 536.7707  |
| Frequencies -- | 539.6006  | 541.3955  | 547.3940  |
| Frequencies -- | 554.3854  | 555.3058  | 565.7440  |
| Frequencies -- | 580.3077  | 587.9405  | 600.4367  |
| Frequencies -- | 603.7406  | 608.9642  | 621.8793  |
| Frequencies -- | 624.1881  | 634.1913  | 636.0084  |
| Frequencies -- | 639.0897  | 640.9303  | 643.3777  |
| Frequencies -- | 655.9278  | 671.8725  | 703.7744  |
| Frequencies -- | 707.7302  | 716.7752  | 722.3360  |
| Frequencies -- | 729.8241  | 735.6346  | 746.1858  |
| Frequencies -- | 746.9108  | 748.2011  | 766.1884  |
| Frequencies -- | 773.4040  | 799.5279  | 803.3016  |
| Frequencies -- | 822.0728  | 829.1026  | 841.9186  |
| Frequencies -- | 846.5016  | 860.1463  | 865.2986  |
| Frequencies -- | 873.1216  | 906.5428  | 911.1147  |
| Frequencies -- | 923.0611  | 932.5222  | 961.1146  |
| Frequencies -- | 966.5121  | 970.6443  | 971.5429  |
| Frequencies -- | 973.3849  | 986.8418  | 999.6688  |
| Frequencies -- | 1005.3134 | 1006.0291 | 1021.9710 |
| Frequencies -- | 1022.1879 | 1031.5231 | 1041.9604 |
| Frequencies -- | 1042.8712 | 1044.2297 | 1047.1829 |
| Frequencies -- | 1047.8908 | 1048.6931 | 1049.6903 |
| Frequencies -- | 1050.1592 | 1055.1016 | 1060.5424 |
| Frequencies -- | 1085.5499 | 1089.5986 | 1095.7763 |
| Frequencies -- | 1100.6146 | 1125.0181 | 1129.3094 |
| Frequencies -- | 1173.2226 | 1173.9088 | 1184.3276 |
| Frequencies -- | 1199.7862 | 1202.3505 | 1208.9147 |
| Frequencies -- | 1212.1275 | 1212.9814 | 1250.4148 |
| Frequencies -- | 1295.0788 | 1301.2339 | 1314.0504 |
| Frequencies -- | 1316.5235 | 1320.6731 | 1326.1631 |
| Frequencies -- | 1338.2047 | 1344.3016 | 1348.8612 |
| Frequencies -- | 1357.7880 | 1374.6994 | 1386.3806 |
| Frequencies -- | 1409.9952 | 1412.3507 | 1412.6455 |

|                |           |           |           |
|----------------|-----------|-----------|-----------|
| Frequencies -- | 1416.3995 | 1420.8665 | 1424.0845 |
| Frequencies -- | 1424.5771 | 1427.1700 | 1427.4864 |
| Frequencies -- | 1430.1590 | 1435.7358 | 1448.9787 |
| Frequencies -- | 1451.3323 | 1452.0286 | 1463.4242 |
| Frequencies -- | 1466.6065 | 1469.8871 | 1471.5574 |
| Frequencies -- | 1481.9241 | 1488.9597 | 1489.6480 |
| Frequencies -- | 1491.4453 | 1496.6772 | 1497.5898 |
| Frequencies -- | 1505.1272 | 1506.9267 | 1510.4038 |
| Frequencies -- | 1513.3161 | 1518.2703 | 1521.6087 |
| Frequencies -- | 1573.2849 | 1590.3104 | 1593.3399 |
| Frequencies -- | 1597.2233 | 1599.6612 | 1616.7858 |
| Frequencies -- | 1620.2968 | 1621.5879 | 1625.1717 |
| Frequencies -- | 1630.3244 | 3010.1285 | 3010.8073 |
| Frequencies -- | 3011.5395 | 3012.4222 | 3013.5536 |
| Frequencies -- | 3028.3127 | 3099.0160 | 3101.0939 |
| Frequencies -- | 3102.8301 | 3103.3122 | 3106.1932 |
| Frequencies -- | 3137.4904 | 3141.1836 | 3141.9931 |
| Frequencies -- | 3144.8617 | 3147.4332 | 3153.9583 |
| Frequencies -- | 3154.5689 | 3161.4304 | 3173.9911 |
| Frequencies -- | 3178.1636 | 3181.2277 | 3183.6056 |
| Frequencies -- | 3195.1813 | 3199.7273 | 3204.9529 |

**Catalyst 9:**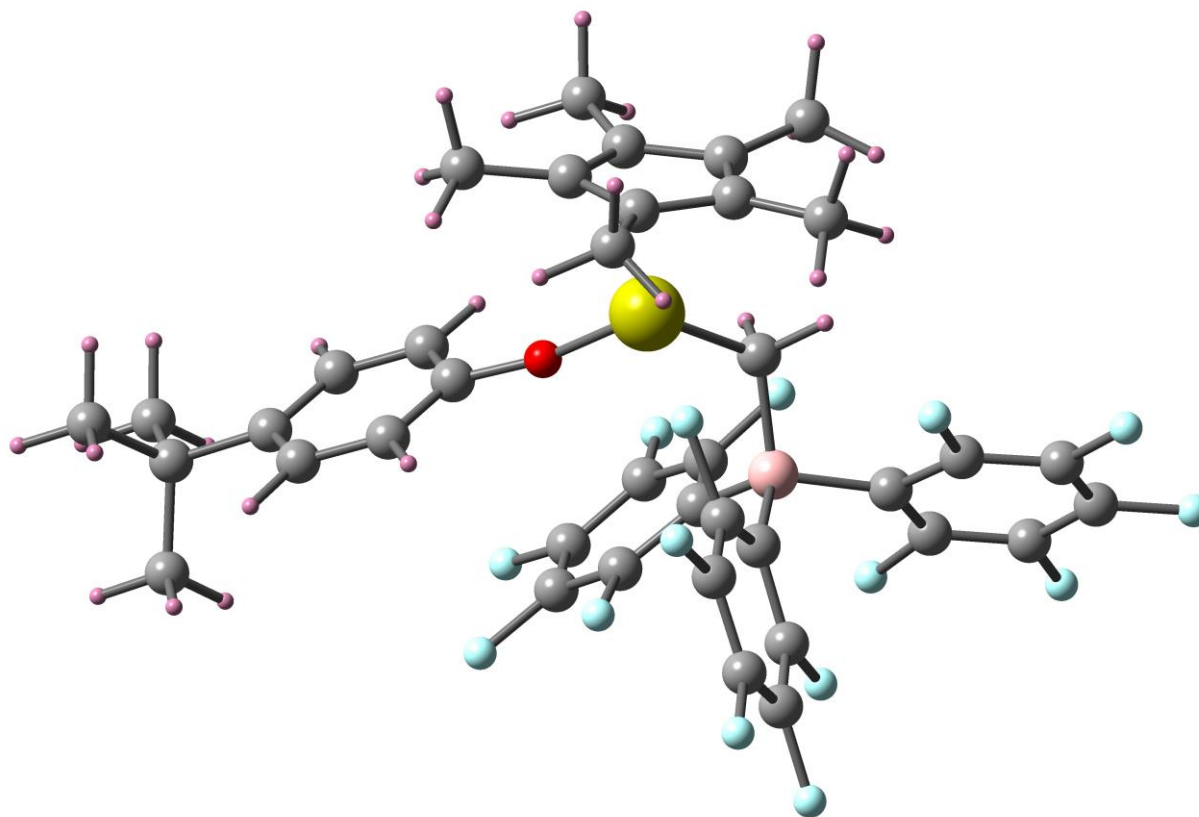

| <b>vacuum</b> | <b>toluene-like solvent</b> | <b>D3 dispersion</b> |
|---------------|-----------------------------|----------------------|
| -3159.0812626 | -3159.0913967               | -0.59670142          |

|    |             |             |             |
|----|-------------|-------------|-------------|
| Ti | -0.32029600 | 2.11455900  | -0.60912300 |
| O  | -1.79543700 | 1.15853200  | -0.32076500 |
| C  | -3.07227300 | 0.64213600  | -0.14869700 |
| C  | -3.72081700 | 0.76085700  | 1.10266200  |
| C  | -3.71104800 | -0.03940600 | -1.20645600 |
| C  | -4.99163700 | 0.18806000  | 1.28224600  |
| C  | -4.98565900 | -0.60732700 | -1.00495200 |
| C  | -5.65953000 | -0.51649000 | 0.24063400  |
| H  | -5.45948400 | 0.28367900  | 2.26227400  |
| H  | -5.43930200 | -1.13880900 | -1.83935900 |
| C  | 0.48569400  | 3.50939200  | -2.43474100 |
| C  | -0.97028800 | 3.44973900  | -2.43590700 |
| C  | 0.89514600  | 4.17001600  | -1.22437700 |
| C  | -1.45176200 | 4.12347700  | -1.24836400 |
| C  | -0.29975400 | 4.53374300  | -0.48109700 |
| F  | 2.25469300  | 0.92254600  | 5.61781800  |
| C  | 2.04040600  | 0.60219900  | 4.28732100  |
| C  | 2.38357000  | -0.66869000 | 3.78628400  |
| C  | 1.46968800  | 1.53666200  | 3.41044800  |
| C  | 2.15919100  | -0.97166800 | 2.43091100  |
| F  | 2.92984200  | -1.61249200 | 4.64306900  |
| C  | 1.28186500  | 1.15029700  | 2.07288400  |

|   |             |             |             |
|---|-------------|-------------|-------------|
| F | 1.10448800  | 2.80198500  | 3.85794700  |
| C | 1.59862400  | -0.07318400 | 1.48403100  |
| F | 2.48748300  | -2.26710500 | 2.03590600  |
| F | 0.66046200  | 2.20658800  | 1.27867300  |
| B | 1.43713000  | -0.49872400 | -0.13805500 |
| C | 2.99243900  | -0.99922500 | -0.55242100 |
| C | 0.26393100  | -1.66085600 | -0.35246500 |
| C | 1.07320700  | 0.76797100  | -1.20927300 |
| C | 3.40620600  | -2.30796000 | -0.90128200 |
| C | 4.06139300  | -0.07009100 | -0.55198100 |
| C | -0.67230400 | -2.09208700 | 0.61383700  |
| C | 0.05533100  | -2.26333600 | -1.61877200 |
| H | 1.98273900  | 1.30967400  | -1.49400300 |
| H | 0.66414700  | 0.31842200  | -2.13165800 |
| C | 4.72101000  | -2.65171100 | -1.27893800 |
| F | 2.51523800  | -3.38237600 | -0.84947300 |
| C | 5.38958400  | -0.36055900 | -0.91273500 |
| F | 3.83719100  | 1.26045000  | -0.13515900 |
| C | -1.68442000 | -3.04583800 | 0.38271100  |
| F | -0.67530300 | -1.54734400 | 1.91002500  |
| C | -0.93650200 | -3.21732700 | -1.90481200 |
| F | 0.88575200  | -1.92305800 | -2.69993500 |
| C | 5.72427800  | -1.66949700 | -1.29554500 |
| F | 5.03935400  | -3.96132000 | -1.62014900 |
| F | 6.36837200  | 0.63007000  | -0.88964100 |
| C | -1.81847200 | -3.62065900 | -0.88876100 |
| F | -2.57181000 | -3.39850000 | 1.39537400  |
| F | -1.05828500 | -3.75968600 | -3.18116500 |
| F | 7.02337400  | -1.98756700 | -1.66588300 |
| F | -2.82051700 | -4.54744100 | -1.14683200 |
| C | -2.89706000 | 4.41614300  | -0.91774900 |
| H | -3.06785800 | 4.52300100  | 0.16213500  |
| H | -3.20135800 | 5.36675600  | -1.38965800 |
| H | -3.57840800 | 3.63796300  | -1.28523800 |
| C | -1.82154700 | 2.95807300  | -3.58595600 |
| H | -1.36305700 | 2.11053300  | -4.11494800 |
| H | -2.82569400 | 2.65269600  | -3.26453200 |
| H | -1.94802600 | 3.76646800  | -4.32717700 |
| C | 1.37619100  | 3.11437200  | -3.58867100 |
| H | 1.03305700  | 2.20026300  | -4.09213000 |
| H | 1.38607100  | 3.92044700  | -4.34277200 |
| H | 2.41501800  | 2.95060000  | -3.27561500 |
| C | 2.31351000  | 4.49777600  | -0.81865100 |
| H | 3.04110700  | 3.78359200  | -1.22339800 |
| H | 2.59015700  | 5.49884100  | -1.19348600 |
| H | 2.44190400  | 4.51609200  | 0.27232100  |
| C | -0.32589000 | 5.31045600  | 0.81709600  |
| H | 0.52479100  | 5.06827000  | 1.46768800  |
| H | -0.27702100 | 6.39318900  | 0.60809200  |
| H | -1.24487100 | 5.13376000  | 1.39309600  |
| H | -3.22235300 | 1.27322400  | 1.92659200  |
| H | -3.20605600 | -0.14368500 | -2.16760700 |
| C | -7.04816900 | -1.16315700 | 0.50313600  |
| C | -6.91631700 | -2.21456200 | 1.65450300  |
| H | -6.58837000 | -1.75471400 | 2.59796200  |
| H | -7.88808800 | -2.69925500 | 1.83926900  |
| H | -6.18664200 | -2.99590400 | 1.39183700  |

|                |             |             |             |
|----------------|-------------|-------------|-------------|
| C              | -8.07237700 | -0.05626200 | 0.91874700  |
| H              | -8.18927200 | 0.69207600  | 0.11903400  |
| H              | -9.05939900 | -0.50522700 | 1.11310000  |
| H              | -7.76149100 | 0.47136100  | 1.83223600  |
| C              | -7.61248800 | -1.89318400 | -0.75075600 |
| H              | -7.75409900 | -1.20574900 | -1.59944200 |
| H              | -6.95944800 | -2.71765900 | -1.07560200 |
| H              | -8.59505200 | -2.32733800 | -0.51163600 |
|                |             |             |             |
| Frequencies -- | 8.4430      | 16.0799     | 21.6875     |
| Frequencies -- | 23.1823     | 26.6704     | 29.8270     |
| Frequencies -- | 31.5192     | 35.3734     | 37.8404     |
| Frequencies -- | 40.4475     | 49.7291     | 54.5428     |
| Frequencies -- | 62.4144     | 71.0873     | 73.5779     |
| Frequencies -- | 78.6673     | 86.8405     | 97.4051     |
| Frequencies -- | 104.6983    | 110.2262    | 110.9540    |
| Frequencies -- | 113.1768    | 114.4241    | 119.5899    |
| Frequencies -- | 123.2027    | 124.3512    | 127.5332    |
| Frequencies -- | 132.2584    | 134.1559    | 138.1330    |
| Frequencies -- | 144.4419    | 148.6922    | 157.2087    |
| Frequencies -- | 159.9348    | 160.9592    | 165.4888    |
| Frequencies -- | 166.3783    | 169.1282    | 173.7344    |
| Frequencies -- | 195.7201    | 208.2969    | 213.8642    |
| Frequencies -- | 219.3043    | 222.3567    | 224.8902    |
| Frequencies -- | 230.7292    | 244.6744    | 246.7494    |
| Frequencies -- | 258.5982    | 263.9969    | 264.8312    |
| Frequencies -- | 265.0386    | 275.8486    | 277.5465    |
| Frequencies -- | 278.9386    | 287.2687    | 294.8215    |
| Frequencies -- | 298.3657    | 299.4742    | 303.3759    |
| Frequencies -- | 305.2024    | 305.6743    | 313.8831    |
| Frequencies -- | 316.6412    | 324.4634    | 331.4002    |
| Frequencies -- | 334.2034    | 338.6425    | 356.0087    |
| Frequencies -- | 363.7785    | 365.4734    | 371.8175    |
| Frequencies -- | 375.4959    | 377.3322    | 379.7269    |
| Frequencies -- | 382.6213    | 394.0648    | 396.3017    |
| Frequencies -- | 411.9011    | 412.4569    | 416.3699    |
| Frequencies -- | 423.2280    | 431.4353    | 432.5260    |
| Frequencies -- | 443.0970    | 445.2851    | 454.5874    |
| Frequencies -- | 459.0030    | 467.5640    | 474.9836    |
| Frequencies -- | 491.8486    | 534.8223    | 536.9830    |
| Frequencies -- | 539.0818    | 540.9517    | 546.9773    |
| Frequencies -- | 553.9786    | 557.5342    | 559.7242    |
| Frequencies -- | 567.8973    | 580.4359    | 588.9019    |
| Frequencies -- | 600.5269    | 603.7928    | 610.3222    |
| Frequencies -- | 624.0269    | 633.9600    | 636.0080    |
| Frequencies -- | 639.5686    | 640.7453    | 654.7910    |
| Frequencies -- | 670.3092    | 703.9753    | 714.5387    |
| Frequencies -- | 717.1030    | 729.6534    | 734.6882    |
| Frequencies -- | 735.2608    | 745.7877    | 746.7644    |
| Frequencies -- | 765.8334    | 800.7301    | 804.7765    |
| Frequencies -- | 821.4591    | 825.6180    | 833.7276    |
| Frequencies -- | 839.5115    | 843.8988    | 862.5410    |
| Frequencies -- | 872.2880    | 906.3781    | 910.7933    |
| Frequencies -- | 925.2005    | 930.6516    | 933.1841    |
| Frequencies -- | 955.6861    | 964.6175    | 968.2566    |
| Frequencies -- | 969.6996    | 971.2558    | 978.4563    |
| Frequencies -- | 1004.7826   | 1021.6984   | 1022.2782   |
| Frequencies -- | 1029.6352   | 1037.0030   | 1042.1570   |
| Frequencies -- | 1042.8593   | 1043.0114   | 1044.2611   |
| Frequencies -- | 1045.8809   | 1048.0043   | 1048.3871   |
| Frequencies -- | 1049.6038   | 1054.7625   | 1085.9037   |
| Frequencies -- | 1087.6345   | 1091.4755   | 1121.7205   |

|                |           |           |           |
|----------------|-----------|-----------|-----------|
| Frequencies -- | 1125.9586 | 1132.0769 | 1173.4721 |
| Frequencies -- | 1174.4710 | 1201.9369 | 1204.5488 |
| Frequencies -- | 1208.5748 | 1211.6855 | 1216.0683 |
| Frequencies -- | 1222.9789 | 1252.3571 | 1275.5698 |
| Frequencies -- | 1294.8672 | 1314.0878 | 1320.4893 |
| Frequencies -- | 1326.5668 | 1338.1819 | 1344.0622 |
| Frequencies -- | 1348.8058 | 1352.0934 | 1383.2452 |
| Frequencies -- | 1396.1237 | 1400.9541 | 1410.8670 |
| Frequencies -- | 1412.4660 | 1413.7111 | 1416.6423 |
| Frequencies -- | 1421.1158 | 1422.5179 | 1425.1248 |
| Frequencies -- | 1426.2687 | 1427.9862 | 1428.6027 |
| Frequencies -- | 1429.4558 | 1435.6755 | 1449.6746 |
| Frequencies -- | 1451.4753 | 1462.4721 | 1466.3570 |
| Frequencies -- | 1469.6051 | 1471.5172 | 1481.2922 |
| Frequencies -- | 1482.0114 | 1487.8273 | 1490.0851 |
| Frequencies -- | 1490.6466 | 1491.2717 | 1497.2363 |
| Frequencies -- | 1497.8513 | 1498.8233 | 1504.5936 |
| Frequencies -- | 1505.1406 | 1509.1146 | 1509.9491 |
| Frequencies -- | 1511.5787 | 1514.3920 | 1520.7821 |
| Frequencies -- | 1520.8591 | 1581.2388 | 1590.3543 |
| Frequencies -- | 1593.7320 | 1598.1659 | 1616.6866 |
| Frequencies -- | 1620.0573 | 1621.5433 | 1630.2204 |
| Frequencies -- | 3007.3227 | 3008.6659 | 3008.8286 |
| Frequencies -- | 3009.7352 | 3010.6655 | 3011.8667 |
| Frequencies -- | 3013.2122 | 3015.5445 | 3026.3273 |
| Frequencies -- | 3097.7426 | 3100.1490 | 3102.5279 |
| Frequencies -- | 3103.5853 | 3104.9516 | 3108.2992 |
| Frequencies -- | 3111.1425 | 3114.6826 | 3120.7303 |
| Frequencies -- | 3125.0527 | 3127.3184 | 3133.2364 |
| Frequencies -- | 3136.3790 | 3139.1224 | 3143.4868 |
| Frequencies -- | 3145.4910 | 3152.6897 | 3178.1452 |
| Frequencies -- | 3186.6230 | 3199.5396 | 3214.2686 |

**Catalyst 10:**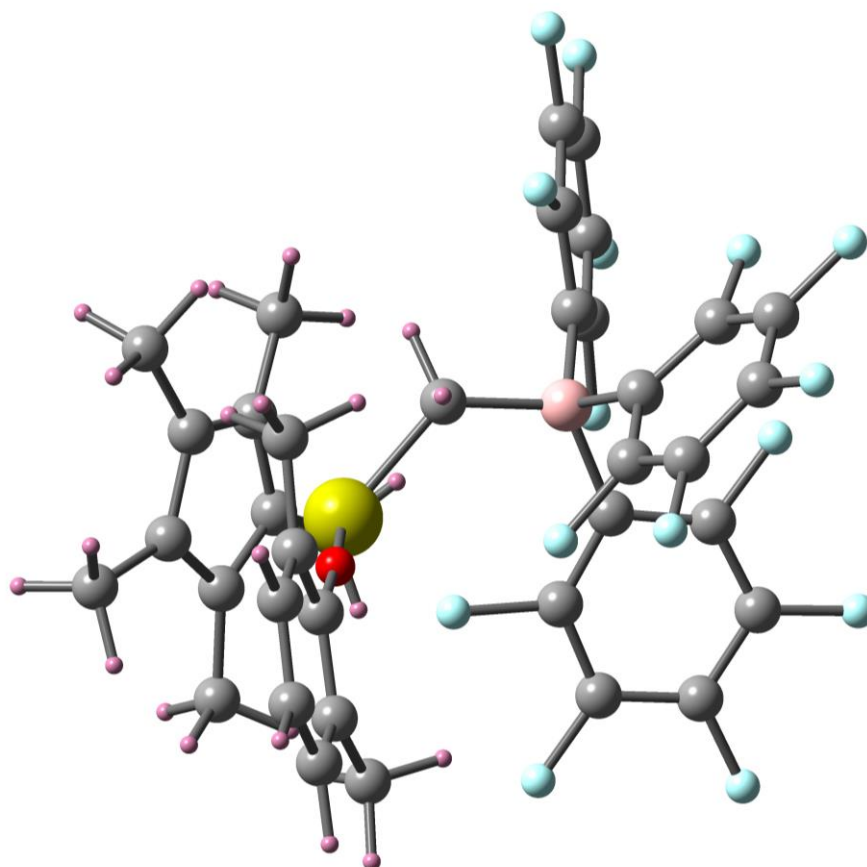

| <b>vacuum</b> | <b>toluene-like solvent</b> | <b>D3 dispersion</b> |
|---------------|-----------------------------|----------------------|
| -3080.5032967 | -3080.5135333               | -0.56227890          |

|    |             |             |             |
|----|-------------|-------------|-------------|
| Ti | -1.77403700 | -1.27927800 | -0.27920500 |
| O  | -3.03778900 | -0.05086200 | -0.55978800 |
| C  | -4.12868500 | 0.79909800  | -0.71737300 |
| C  | -4.40971200 | 1.32727900  | -2.01170500 |
| C  | -4.90497900 | 1.13960100  | 0.42977300  |
| C  | -5.52597100 | 2.18563400  | -2.14156300 |
| C  | -6.00721700 | 2.00549900  | 0.24396700  |
| C  | -6.32470100 | 2.52063400  | -1.02919500 |
| H  | -5.76084600 | 2.60219700  | -3.12299100 |
| H  | -6.61300500 | 2.28374300  | 1.10859600  |
| H  | -7.17960800 | 3.18838600  | -1.15113000 |
| C  | -2.11877300 | -3.13636000 | -1.74071300 |
| C  | -0.88968900 | -3.46784400 | -1.04477000 |
| C  | -3.20167100 | -3.12725200 | -0.77420500 |
| C  | -1.19976000 | -3.60309300 | 0.35270000  |
| C  | -2.62655200 | -3.39009600 | 0.52281100  |
| F  | 0.73185000  | 0.68297200  | 5.83352000  |
| C  | 0.83014900  | 0.55558200  | 4.45801900  |
| C  | 1.95509200  | 1.04331500  | 3.76498000  |
| C  | -0.18911700 | -0.06618700 | 3.72263600  |
| C  | 2.03035500  | 0.90481900  | 2.36712900  |



|   |             |             |             |
|---|-------------|-------------|-------------|
| F | 2.97973300  | 1.65204600  | 4.47372900  |
| C | -0.03207600 | -0.16174100 | 2.32920800  |
| F | -1.31898400 | -0.57164200 | 4.35838400  |
| C | 1.03670100  | 0.28991100  | 1.55696500  |
| F | 3.18982100  | 1.39684900  | 1.77157200  |
| F | -1.15513600 | -0.84370800 | 1.70455000  |
| B | 1.19028000  | 0.25836700  | -0.12330700 |
| C | 1.25542300  | 1.90032300  | -0.48537000 |
| C | 2.53840700  | -0.59953000 | -0.59086200 |
| C | -0.07596100 | -0.44381500 | -1.04488700 |
| C | 2.37395600  | 2.64765300  | -0.92846700 |
| C | 0.10258500  | 2.69961000  | -0.29886100 |
| C | 3.25615100  | -1.52537200 | 0.19732200  |
| C | 3.00305500  | -0.54397600 | -1.92956300 |
| H | -0.57380900 | 0.36507600  | -1.61135300 |
| H | 0.39625600  | -1.10495600 | -1.77894700 |
| C | 2.33939900  | 4.02791900  | -1.22019900 |
| F | 3.62784800  | 2.05249000  | -1.08117300 |
| C | 0.01413600  | 4.07723400  | -0.56808100 |
| F | -1.06664800 | 2.11395900  | 0.22426100  |
| C | 4.36427900  | -2.27433300 | -0.25138800 |
| F | 2.86654600  | -1.79620100 | 1.52381800  |
| C | 4.10274500  | -1.26277100 | -2.42922900 |
| F | 2.33751500  | 0.26537900  | -2.86104300 |
| C | 1.14869300  | 4.75202500  | -1.04780700 |
| F | 3.48039400  | 4.68395000  | -1.66728500 |
| F | -1.17331900 | 4.77227600  | -0.35740900 |
| C | 4.80333100  | -2.13420300 | -1.57660000 |
| F | 5.01327300  | -3.16120900 | 0.60276900  |
| F | 4.49913500  | -1.12882300 | -3.75549600 |
| F | 1.09636000  | 6.10966000  | -1.33028300 |
| F | 5.89093900  | -2.85875300 | -2.04378300 |
| C | -3.53687700 | 1.00959600  | -3.21328400 |
| H | -2.51032800 | 1.38101500  | -3.07014900 |
| H | -3.46699400 | -0.07223200 | -3.39865900 |
| H | -3.93776000 | 1.47996600  | -4.12143000 |
| C | -4.54259800 | 0.63290700  | 1.81416300  |
| H | -4.50542800 | -0.46580600 | 1.85920000  |
| H | -3.55405200 | 1.00552400  | 2.12527700  |
| H | -5.27589900 | 0.97190500  | 2.55841600  |
| C | -0.23927500 | -4.02480600 | 1.44076500  |
| H | -0.59345900 | -3.73842200 | 2.43963200  |
| H | -0.13297100 | -5.12377500 | 1.43941900  |
| H | 0.76509700  | -3.60371900 | 1.30693800  |
| C | 0.41938400  | -3.82322300 | -1.70464100 |
| H | 0.61155000  | -3.23124900 | -2.60955000 |
| H | 1.27331200  | -3.69905500 | -1.02919900 |
| H | 0.39960900  | -4.88311200 | -2.01384300 |
| C | -2.25631300 | -3.02610500 | -3.24293800 |
| H | -1.43858600 | -2.44864100 | -3.69847600 |
| H | -2.22972100 | -4.03233400 | -3.69614000 |
| H | -3.20480500 | -2.56394500 | -3.54344800 |
| C | -4.67394300 | -2.99058400 | -1.08929600 |
| H | -4.85842400 | -2.36772900 | -1.97402900 |
| H | -5.10327100 | -3.98670500 | -1.29445200 |
| H | -5.24464200 | -2.55583800 | -0.25820200 |
| C | -3.37931700 | -3.53343500 | 1.82756600  |

|   |             |             |            |
|---|-------------|-------------|------------|
| H | -4.38487500 | -3.09689900 | 1.77632300 |
| H | -3.50251200 | -4.60203400 | 2.07423300 |
| H | -2.85297400 | -3.06884000 | 2.67410500 |

|                |           |           |           |
|----------------|-----------|-----------|-----------|
| Frequencies -- | 8.2163    | 17.4658   | 19.5060   |
| Frequencies -- | 27.4549   | 28.8544   | 33.3747   |
| Frequencies -- | 33.5569   | 34.3038   | 42.1559   |
| Frequencies -- | 44.2861   | 52.1819   | 60.6641   |
| Frequencies -- | 77.5049   | 80.6538   | 86.7490   |
| Frequencies -- | 91.9324   | 98.0455   | 104.5109  |
| Frequencies -- | 105.0024  | 110.0038  | 115.0506  |
| Frequencies -- | 116.5547  | 119.7949  | 122.6276  |
| Frequencies -- | 124.4613  | 126.4453  | 129.6014  |
| Frequencies -- | 134.1400  | 136.7666  | 137.8646  |
| Frequencies -- | 142.1052  | 147.0440  | 154.8421  |
| Frequencies -- | 157.8318  | 159.3582  | 161.8787  |
| Frequencies -- | 164.6400  | 169.2570  | 173.0549  |
| Frequencies -- | 182.9749  | 204.9979  | 211.9950  |
| Frequencies -- | 215.8811  | 220.7886  | 223.8262  |
| Frequencies -- | 231.9668  | 251.7093  | 259.0647  |
| Frequencies -- | 263.8979  | 264.5392  | 264.9000  |
| Frequencies -- | 273.8183  | 274.9620  | 279.3305  |
| Frequencies -- | 287.1078  | 293.4760  | 298.4423  |
| Frequencies -- | 300.3136  | 302.7418  | 303.6084  |
| Frequencies -- | 304.5320  | 322.6090  | 326.2455  |
| Frequencies -- | 330.5836  | 332.0972  | 333.9413  |
| Frequencies -- | 345.1852  | 354.7252  | 360.3748  |
| Frequencies -- | 367.9998  | 373.7983  | 375.9823  |
| Frequencies -- | 379.3717  | 391.7774  | 395.4715  |
| Frequencies -- | 397.9219  | 413.4197  | 430.7541  |
| Frequencies -- | 432.7439  | 444.4648  | 453.6991  |
| Frequencies -- | 459.8373  | 467.6205  | 490.4874  |
| Frequencies -- | 508.7347  | 516.3534  | 532.6302  |
| Frequencies -- | 536.8298  | 541.8673  | 545.2425  |
| Frequencies -- | 548.4007  | 549.7996  | 551.5825  |
| Frequencies -- | 555.1546  | 559.0094  | 572.6399  |
| Frequencies -- | 581.9724  | 587.8229  | 600.4147  |
| Frequencies -- | 606.2281  | 611.5069  | 624.7826  |
| Frequencies -- | 633.1318  | 636.6802  | 642.5772  |
| Frequencies -- | 650.8981  | 679.1920  | 698.3658  |
| Frequencies -- | 714.4381  | 726.5290  | 736.3857  |
| Frequencies -- | 739.0225  | 740.1512  | 742.4811  |
| Frequencies -- | 747.4994  | 763.1563  | 785.3227  |
| Frequencies -- | 801.0038  | 804.5239  | 819.5570  |
| Frequencies -- | 833.8865  | 860.8580  | 882.6699  |
| Frequencies -- | 903.0293  | 909.9330  | 915.1928  |
| Frequencies -- | 921.9707  | 928.3014  | 967.9342  |
| Frequencies -- | 973.2591  | 982.1736  | 987.7932  |
| Frequencies -- | 1000.1013 | 1002.1619 | 1023.3292 |
| Frequencies -- | 1029.8701 | 1038.5750 | 1041.3884 |
| Frequencies -- | 1042.8508 | 1046.4611 | 1048.1546 |
| Frequencies -- | 1048.5816 | 1049.9045 | 1051.2372 |
| Frequencies -- | 1053.3446 | 1053.9432 | 1056.4047 |
| Frequencies -- | 1075.9544 | 1087.8844 | 1090.7665 |
| Frequencies -- | 1109.5735 | 1125.7785 | 1173.4762 |
| Frequencies -- | 1176.8304 | 1192.7434 | 1202.2843 |
| Frequencies -- | 1209.3451 | 1211.9405 | 1213.4884 |
| Frequencies -- | 1277.8728 | 1282.6018 | 1294.7805 |
| Frequencies -- | 1318.7005 | 1319.8319 | 1339.3646 |
| Frequencies -- | 1344.9912 | 1350.1021 | 1362.4223 |
| Frequencies -- | 1392.1057 | 1410.3037 | 1410.7630 |
| Frequencies -- | 1414.9165 | 1416.0726 | 1417.7611 |

|                |           |           |           |
|----------------|-----------|-----------|-----------|
| Frequencies -- | 1418.8357 | 1421.5764 | 1424.6579 |
| Frequencies -- | 1426.6032 | 1429.1450 | 1429.6835 |
| Frequencies -- | 1431.6162 | 1435.3688 | 1451.1673 |
| Frequencies -- | 1453.6142 | 1465.7576 | 1467.0011 |
| Frequencies -- | 1467.8266 | 1471.8495 | 1472.5839 |
| Frequencies -- | 1482.0077 | 1487.1210 | 1489.2733 |
| Frequencies -- | 1490.6091 | 1494.7367 | 1499.2608 |
| Frequencies -- | 1499.6421 | 1503.8574 | 1504.6532 |
| Frequencies -- | 1505.2503 | 1508.4840 | 1510.5580 |
| Frequencies -- | 1517.8180 | 1523.2318 | 1591.2018 |
| Frequencies -- | 1593.6571 | 1595.9236 | 1605.6703 |
| Frequencies -- | 1608.2134 | 1616.6472 | 1618.7387 |
| Frequencies -- | 1630.2002 | 3009.7575 | 3011.2132 |
| Frequencies -- | 3011.8979 | 3012.2801 | 3012.5613 |
| Frequencies -- | 3013.6125 | 3020.6256 | 3023.9561 |
| Frequencies -- | 3095.4398 | 3097.3916 | 3103.2342 |
| Frequencies -- | 3103.7825 | 3105.5062 | 3107.0490 |
| Frequencies -- | 3109.6847 | 3132.9839 | 3133.4850 |
| Frequencies -- | 3137.3943 | 3142.5586 | 3144.2032 |
| Frequencies -- | 3146.9592 | 3150.9122 | 3160.4067 |
| Frequencies -- | 3162.6984 | 3173.5173 | 3194.5910 |

**Catalyst 11:**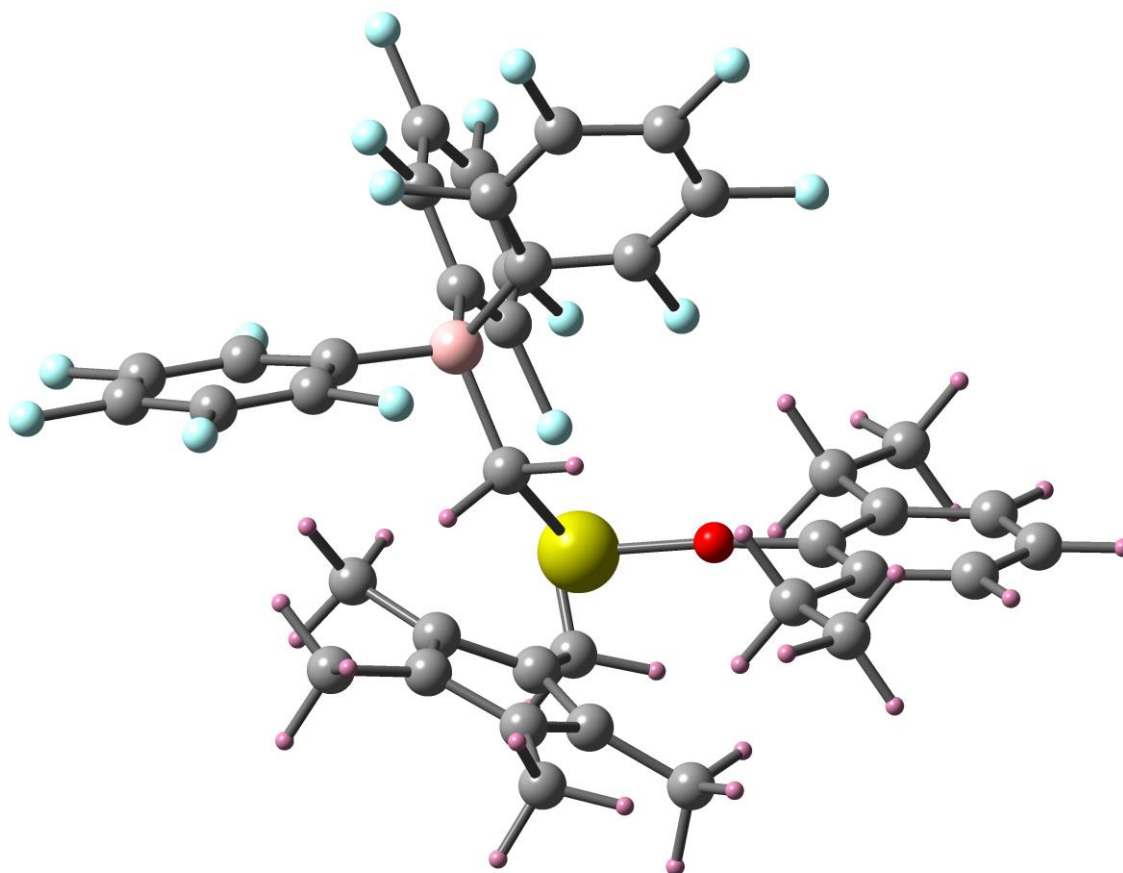

| <b>vacuum</b> | <b>toluene-like solvent</b> | <b>D3 dispersion</b> |
|---------------|-----------------------------|----------------------|
| -3159.0775357 | -3159.0871774               | -0.59814182          |

|    |             |             |             |
|----|-------------|-------------|-------------|
| Ti | -1.53887500 | -1.36401500 | -0.35039100 |
| O  | -2.85536000 | -0.17702800 | -0.55386900 |
| C  | -3.99759900 | 0.61720900  | -0.64746300 |
| C  | -4.29987800 | 1.23382900  | -1.89957100 |
| C  | -4.79367000 | 0.80708400  | 0.52305300  |
| C  | -5.47028000 | 2.02371600  | -1.96436100 |
| C  | -5.94923600 | 1.61121900  | 0.39628800  |
| C  | -6.29154600 | 2.20625900  | -0.83397900 |
| H  | -5.73953100 | 2.50996500  | -2.90053900 |
| H  | -6.58328400 | 1.78256300  | 1.26455200  |
| H  | -7.18897700 | 2.82369000  | -0.90829100 |
| C  | -1.85193200 | -3.11938800 | -1.93213700 |
| C  | -0.58537600 | -3.44497400 | -1.30199700 |
| C  | -2.90051800 | -3.23878800 | -0.93559300 |
| C  | -0.84158700 | -3.70342900 | 0.08855700  |
| C  | -2.27018600 | -3.57363400 | 0.31809000  |
| F  | 1.01292700  | 0.05352300  | 5.89917900  |
| C  | 1.08637400  | 0.07929900  | 4.51639300  |
| C  | 2.18311000  | 0.67212500  | 3.86100200  |
| C  | 0.06851500  | -0.48665200 | 3.73547700  |

|   |             |             |             |
|---|-------------|-------------|-------------|
| C | 2.23388500  | 0.68694100  | 2.45525400  |
| F | 3.20397300  | 1.23256800  | 4.61380900  |
| C | 0.19974900  | -0.42837300 | 2.33731700  |
| F | -1.03648100 | -1.08700800 | 4.33186100  |
| C | 1.24323800  | 0.12987300  | 1.60081600  |
| F | 3.36248500  | 1.28282500  | 1.89616300  |
| F | -0.92387900 | -1.05773700 | 1.66281800  |
| B | 1.36067400  | 0.28348500  | -0.07479900 |
| C | 1.31633800  | 1.95471000  | -0.25646300 |
| C | 2.74677200  | -0.43061200 | -0.65730200 |
| C | 0.12739000  | -0.40856500 | -1.04879800 |
| C | 2.38067000  | 2.81382600  | -0.62382800 |
| C | 0.11971400  | 2.65533200  | 0.02533600  |
| C | 3.52805500  | -1.40308100 | 0.00377600  |
| C | 3.17776600  | -0.19300700 | -1.98744700 |
| H | -0.39276700 | 0.41723600  | -1.56899200 |
| H | 0.62764700  | -1.00688800 | -1.81762500 |
| C | 2.25660000  | 4.21219600  | -0.76639100 |
| F | 3.66583800  | 2.31727100  | -0.84959100 |
| C | -0.05807500 | 4.04525600  | -0.09557300 |
| F | -1.00140500 | 1.94485000  | 0.49683600  |
| C | 4.66281600  | -2.03372500 | -0.54833100 |
| F | 3.18302700  | -1.84703400 | 1.29562800  |
| C | 4.30145500  | -0.78806000 | -2.58635100 |
| F | 2.44874000  | 0.68159700  | -2.80564700 |
| C | 1.02544300  | 4.83715900  | -0.50986900 |
| F | 3.34804500  | 4.98254500  | -1.15019900 |
| F | -1.28293200 | 4.63795200  | 0.19815500  |
| C | 5.06430700  | -1.71541000 | -1.85440600 |
| F | 5.37558900  | -2.97826800 | 0.18463400  |
| F | 4.66077200  | -0.47885900 | -3.89385800 |
| F | 0.88487400  | 6.21087800  | -0.64763800 |
| F | 6.17660000  | -2.32140200 | -2.42189900 |
| C | -3.36225700 | 1.05074600  | -3.09460500 |
| H | -2.36367200 | 1.42019600  | -2.80658900 |
| C | -4.36021300 | 0.19205300  | 1.85451000  |
| H | -3.37729600 | 0.61642000  | 2.12191600  |
| C | -3.77359200 | 1.73625800  | -4.41577700 |
| H | -3.01927700 | 1.52533900  | -5.19020900 |
| H | -4.74413400 | 1.37121800  | -4.78782100 |
| H | -3.83697900 | 2.82998200  | -4.30829100 |
| C | -5.31583100 | 0.37973500  | 3.05303400  |
| H | -6.30989100 | -0.05443000 | 2.86078100  |
| H | -4.89658200 | -0.12098200 | 3.93985900  |
| H | -5.44963900 | 1.44211100  | 3.30823200  |
| H | -4.18956300 | -0.88759500 | 1.71243000  |
| H | -3.23334600 | -0.02681800 | -3.28549700 |
| C | -2.05008700 | -2.91115200 | -3.41732800 |
| H | -1.27509600 | -2.26887300 | -3.86051200 |
| H | -2.00012500 | -3.88217600 | -3.94012400 |
| H | -3.02748600 | -2.47076600 | -3.65026700 |
| C | 0.71722000  | -3.68132900 | -2.02632800 |
| H | 0.75409700  | -4.72407300 | -2.38768200 |
| H | 0.83385600  | -3.03485000 | -2.90654700 |
| H | 1.58825800  | -3.53216300 | -1.37790300 |
| C | -4.38646900 | -3.14280100 | -1.19494400 |
| H | -4.62717000 | -2.43792000 | -2.00114800 |

|   |             |             |             |
|---|-------------|-------------|-------------|
| H | -4.77658300 | -4.13098000 | -1.49471800 |
| H | -4.94833300 | -2.82647500 | -0.30640100 |
| C | 0.17372400  | -4.16137600 | 1.11020200  |
| H | 0.32179500  | -5.25236400 | 1.02623500  |
| H | 1.15550300  | -3.69149200 | 0.97198600  |
| H | -0.15325400 | -3.96132700 | 2.13909700  |
| C | -2.96983000 | -3.86444900 | 1.62796100  |
| H | -4.00528800 | -3.50115600 | 1.63541500  |
| H | -3.00862500 | -4.95435600 | 1.79697600  |
| H | -2.45290400 | -3.42534000 | 2.49362100  |

|                |           |           |           |
|----------------|-----------|-----------|-----------|
| Frequencies -- | 3.6561    | 15.9062   | 17.2281   |
| Frequencies -- | 22.7204   | 27.2359   | 28.8663   |
| Frequencies -- | 30.3676   | 33.6306   | 33.9890   |
| Frequencies -- | 41.0873   | 43.7744   | 48.1490   |
| Frequencies -- | 55.5824   | 65.3663   | 70.7817   |
| Frequencies -- | 74.8337   | 87.9853   | 88.9247   |
| Frequencies -- | 100.6581  | 105.2435  | 107.4893  |
| Frequencies -- | 113.4648  | 116.0779  | 121.1396  |
| Frequencies -- | 123.4761  | 125.2131  | 126.4744  |
| Frequencies -- | 129.6692  | 134.1003  | 137.0181  |
| Frequencies -- | 141.8596  | 142.8936  | 147.3507  |
| Frequencies -- | 157.6961  | 158.7723  | 159.4029  |
| Frequencies -- | 162.8692  | 167.1136  | 173.6210  |
| Frequencies -- | 177.5428  | 180.9774  | 187.3433  |
| Frequencies -- | 199.8626  | 214.0665  | 214.2051  |
| Frequencies -- | 222.7037  | 225.5968  | 246.7395  |
| Frequencies -- | 259.4387  | 263.7625  | 263.9410  |
| Frequencies -- | 264.6825  | 273.8434  | 274.4192  |
| Frequencies -- | 279.0923  | 281.0190  | 286.3920  |
| Frequencies -- | 289.8900  | 291.4875  | 299.1476  |
| Frequencies -- | 300.4391  | 301.7352  | 303.4837  |
| Frequencies -- | 304.8356  | 316.9602  | 323.5662  |
| Frequencies -- | 326.3910  | 328.6276  | 333.2389  |
| Frequencies -- | 341.8315  | 344.6809  | 358.7813  |
| Frequencies -- | 364.2701  | 368.1370  | 373.6252  |
| Frequencies -- | 376.1002  | 379.5185  | 390.2425  |
| Frequencies -- | 395.4996  | 397.4707  | 411.2455  |
| Frequencies -- | 431.2135  | 432.6930  | 444.2780  |
| Frequencies -- | 453.4150  | 459.7343  | 467.3440  |
| Frequencies -- | 503.8188  | 519.3055  | 529.0187  |
| Frequencies -- | 532.1279  | 536.6755  | 541.8329  |
| Frequencies -- | 545.1876  | 549.6818  | 550.3622  |
| Frequencies -- | 556.2094  | 561.6147  | 575.5462  |
| Frequencies -- | 582.1599  | 584.2876  | 598.3773  |
| Frequencies -- | 604.2354  | 606.1860  | 615.1642  |
| Frequencies -- | 624.7326  | 633.2603  | 637.0200  |
| Frequencies -- | 642.5527  | 651.6935  | 679.3751  |
| Frequencies -- | 698.4619  | 712.3959  | 714.3002  |
| Frequencies -- | 726.3615  | 729.5953  | 736.8275  |
| Frequencies -- | 741.3342  | 746.5233  | 762.6464  |
| Frequencies -- | 772.6313  | 787.7907  | 801.5324  |
| Frequencies -- | 804.1358  | 819.3526  | 826.7425  |
| Frequencies -- | 835.1316  | 852.6341  | 861.2123  |
| Frequencies -- | 882.8112  | 902.7318  | 915.2246  |
| Frequencies -- | 923.4982  | 930.9991  | 967.6923  |
| Frequencies -- | 974.7564  | 983.2625  | 992.1609  |
| Frequencies -- | 994.2827  | 999.9457  | 1023.0820 |
| Frequencies -- | 1024.5024 | 1029.5254 | 1040.2247 |
| Frequencies -- | 1041.3855 | 1043.2404 | 1047.5976 |
| Frequencies -- | 1048.4343 | 1049.4060 | 1051.5182 |
| Frequencies -- | 1053.7992 | 1057.8367 | 1073.8261 |

|                |           |           |           |
|----------------|-----------|-----------|-----------|
| Frequencies -- | 1088.1078 | 1090.6040 | 1093.0456 |
| Frequencies -- | 1096.9899 | 1099.9617 | 1122.9062 |
| Frequencies -- | 1126.3084 | 1173.0855 | 1175.9895 |
| Frequencies -- | 1193.8153 | 1202.5615 | 1202.6587 |
| Frequencies -- | 1211.6764 | 1213.2911 | 1263.9805 |
| Frequencies -- | 1277.7235 | 1285.4041 | 1289.8134 |
| Frequencies -- | 1294.9599 | 1318.9981 | 1320.0213 |
| Frequencies -- | 1325.1353 | 1339.6073 | 1343.2130 |
| Frequencies -- | 1345.4030 | 1350.4868 | 1380.8952 |
| Frequencies -- | 1393.5985 | 1410.1224 | 1410.6951 |
| Frequencies -- | 1413.8712 | 1415.3178 | 1416.3550 |
| Frequencies -- | 1416.6877 | 1421.9242 | 1424.7475 |
| Frequencies -- | 1425.9439 | 1429.5243 | 1431.3049 |
| Frequencies -- | 1434.8509 | 1435.4330 | 1450.2550 |
| Frequencies -- | 1453.0533 | 1466.2647 | 1466.9051 |
| Frequencies -- | 1467.7081 | 1468.4317 | 1471.6212 |
| Frequencies -- | 1480.2891 | 1481.3453 | 1490.1554 |
| Frequencies -- | 1493.1874 | 1493.8446 | 1498.6745 |
| Frequencies -- | 1499.7610 | 1499.8276 | 1500.7033 |
| Frequencies -- | 1504.0872 | 1505.8314 | 1506.8955 |
| Frequencies -- | 1508.0070 | 1509.3168 | 1517.4797 |
| Frequencies -- | 1523.3706 | 1591.3349 | 1593.6876 |
| Frequencies -- | 1596.0798 | 1600.9552 | 1608.7524 |
| Frequencies -- | 1617.0628 | 1619.0948 | 1629.7575 |
| Frequencies -- | 3009.5866 | 3010.8033 | 3011.1763 |
| Frequencies -- | 3011.9077 | 3012.3029 | 3012.6405 |
| Frequencies -- | 3012.7522 | 3013.5141 | 3019.6093 |
| Frequencies -- | 3024.9042 | 3064.8420 | 3068.4466 |
| Frequencies -- | 3095.5441 | 3097.4924 | 3103.9768 |
| Frequencies -- | 3105.2453 | 3107.2509 | 3113.3852 |
| Frequencies -- | 3114.3884 | 3120.2728 | 3120.3761 |
| Frequencies -- | 3137.5904 | 3139.7726 | 3142.0293 |
| Frequencies -- | 3147.0208 | 3151.8718 | 3158.9840 |
| Frequencies -- | 3170.2664 | 3203.6584 | 3212.9655 |

**Catalyst 12:**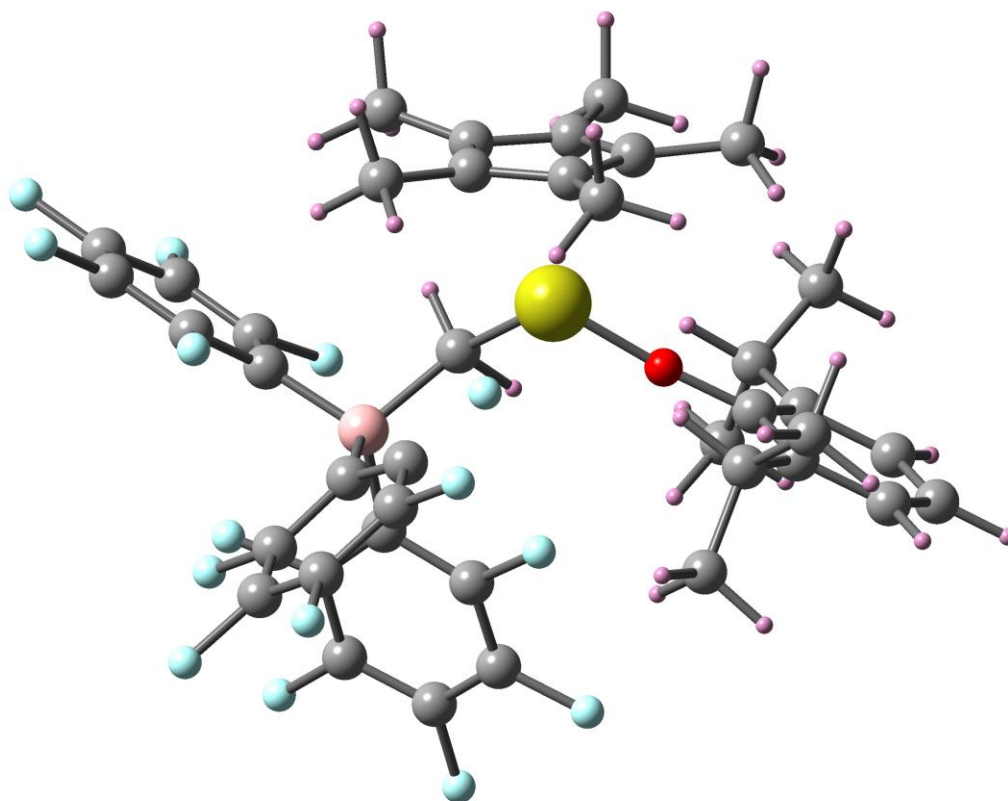

| <b>vacuum</b> | <b>toluene-like solvent</b> | <b>D3 dispersion</b> |
|---------------|-----------------------------|----------------------|
| -3237.6548737 | -3237.6579383               | -0.63875866          |

|    |             |             |             |
|----|-------------|-------------|-------------|
| Ti | -1.41832800 | -1.38017700 | -0.37821000 |
| O  | -2.77000400 | -0.21900800 | -0.50997700 |
| C  | -3.92244900 | 0.56897100  | -0.56483600 |
| C  | -4.23860300 | 1.24271400  | -1.78680700 |
| C  | -4.72622800 | 0.70272200  | 0.61181500  |
| C  | -5.40586500 | 2.04179900  | -1.80682600 |
| C  | -5.87631100 | 1.52151100  | 0.52542000  |
| C  | -6.22161200 | 2.18028600  | -0.66901000 |
| H  | -5.67378200 | 2.57133500  | -2.72161900 |
| H  | -6.50517300 | 1.65245500  | 1.40634800  |
| H  | -7.11449100 | 2.80729200  | -0.70915200 |
| C  | -1.64050900 | -3.06750400 | -2.04865700 |
| C  | -0.39334300 | -3.40410800 | -1.38808300 |
| C  | -2.72182900 | -3.24142500 | -1.09619400 |
| C  | -0.69494900 | -3.72226100 | -0.01834400 |
| C  | -2.13190500 | -3.61843500 | 0.16531100  |
| F  | 1.06778000  | -0.05194500 | 5.91639200  |
| C  | 1.15580100  | -0.00354800 | 4.53505600  |
| C  | 2.24929100  | 0.61720900  | 3.90083900  |
| C  | 0.15723000  | -0.57587000 | 3.73434900  |
| C  | 2.31455000  | 0.65452400  | 2.49614000  |
| F  | 3.25406700  | 1.18049200  | 4.67292400  |
| C  | 0.30058200  | -0.49093000 | 2.33888800  |



|   |             |             |             |
|---|-------------|-------------|-------------|
| F | -0.94202800 | -1.20597300 | 4.30980400  |
| C | 1.34069400  | 0.09831600  | 1.62204400  |
| F | 3.44503900  | 1.26743100  | 1.95967800  |
| F | -0.80041800 | -1.13748400 | 1.64271800  |
| B | 1.47962700  | 0.27074900  | -0.05082500 |
| C | 1.49480600  | 1.94554500  | -0.21963100 |
| C | 2.85249600  | -0.47656000 | -0.62549600 |
| C | 0.22109600  | -0.35078600 | -1.03437900 |
| C | 2.58969200  | 2.77095100  | -0.57484500 |
| C | 0.32001700  | 2.68469100  | 0.05454600  |
| C | 3.62225200  | -1.45115200 | 0.04607500  |
| C | 3.29650300  | -0.24874200 | -1.95301500 |
| H | -0.33944000 | 0.50564400  | -1.45316500 |
| H | 0.69881100  | -0.86272000 | -1.87690600 |
| C | 2.51380600  | 4.17328000  | -0.71148600 |
| F | 3.85992000  | 2.23350100  | -0.79258400 |
| C | 0.18979300  | 4.08004900  | -0.06199500 |
| F | -0.83259800 | 2.01068000  | 0.50541900  |
| C | 4.75372100  | -2.09631200 | -0.49602300 |
| F | 3.26840500  | -1.88387900 | 1.33916600  |
| C | 4.41688800  | -0.85911400 | -2.54270400 |
| F | 2.58960800  | 0.63859600  | -2.77762300 |
| C | 1.30210700  | 4.83794400  | -0.46246300 |
| F | 3.63391900  | 4.90834500  | -1.08173500 |
| F | -1.02083200 | 4.70979700  | 0.21517900  |
| C | 5.16569900  | -1.79045100 | -1.80177100 |
| F | 5.45295500  | -3.04335500 | 0.24660700  |
| F | 4.78780800  | -0.55871700 | -3.84901700 |
| F | 1.20768300  | 6.21591600  | -0.59643900 |
| F | 6.27455600  | -2.41141900 | -2.35941300 |
| C | -3.34327100 | 1.16352700  | -3.03276500 |
| H | -2.56049000 | 0.41687900  | -2.84412000 |
| C | -4.34513600 | 0.05421100  | 1.95129900  |
| H | -3.53058700 | -0.65830500 | 1.76731800  |
| C | -2.62070100 | 2.52061100  | -3.28704700 |
| H | -1.91192200 | 2.42541000  | -4.12555800 |
| H | -3.33788100 | 3.31673400  | -3.53900000 |
| H | -2.06068000 | 2.84537400  | -2.39836300 |
| C | -3.79598900 | 1.12166400  | 2.94530800  |
| H | -4.57273100 | 1.85486000  | 3.21123600  |
| H | -3.45187100 | 0.63824700  | 3.87358100  |
| H | -2.95093200 | 1.67226200  | 2.50649200  |
| C | -1.79206500 | -2.78880400 | -3.52733300 |
| H | -0.94315700 | -2.22162600 | -3.93436700 |
| H | -1.83917400 | -3.74130800 | -4.08395300 |
| H | -2.70941800 | -2.23397300 | -3.75858100 |
| C | 0.93414100  | -3.60405100 | -2.07656700 |
| H | 0.96071700  | -4.60766800 | -2.53635600 |
| H | 1.10785800  | -2.87982400 | -2.88359600 |
| H | 1.77672100  | -3.54507300 | -1.37903900 |
| C | -4.19888600 | -3.16417700 | -1.40484800 |
| H | -4.41865600 | -2.47555500 | -2.23031600 |
| H | -4.56749700 | -4.16141400 | -1.70231700 |
| H | -4.79342300 | -2.84094300 | -0.54057500 |
| C | 0.29084600  | -4.20750400 | 1.01949100  |
| H | 0.46406600  | -5.29050800 | 0.89269000  |
| H | 1.26690100  | -3.71317100 | 0.93932200  |

|   |             |             |             |
|---|-------------|-------------|-------------|
| H | -0.07737900 | -4.06004200 | 2.04324800  |
| C | -2.87762700 | -3.96515200 | 1.43520800  |
| H | -3.89451100 | -3.55367000 | 1.44624900  |
| H | -2.97010500 | -5.06115400 | 1.52738100  |
| H | -2.36240900 | -3.61065500 | 2.33944800  |
| C | -5.51252800 | -0.75185800 | 2.58904000  |
| H | -5.91516500 | -1.50178800 | 1.88954000  |
| H | -5.15799600 | -1.27667900 | 3.49064100  |
| H | -6.34551000 | -0.10154800 | 2.89499300  |
| C | -4.11926000 | 0.70482500  | -4.30110000 |
| H | -3.42261400 | 0.57634900  | -5.14522800 |
| H | -4.63771400 | -0.25264100 | -4.13384900 |
| H | -4.87571800 | 1.44211300  | -4.60917100 |

|                |          |          |          |
|----------------|----------|----------|----------|
| Frequencies -- | 10.1126  | 17.4913  | 19.2503  |
| Frequencies -- | 23.6321  | 26.3732  | 31.6207  |
| Frequencies -- | 33.4545  | 34.3620  | 37.2680  |
| Frequencies -- | 42.9374  | 48.1845  | 53.5212  |
| Frequencies -- | 56.8928  | 59.8469  | 64.4815  |
| Frequencies -- | 73.8212  | 77.0138  | 96.2660  |
| Frequencies -- | 100.0596 | 102.5524 | 104.5341 |
| Frequencies -- | 112.9152 | 114.5978 | 117.1616 |
| Frequencies -- | 121.1858 | 123.9233 | 126.1602 |
| Frequencies -- | 126.7048 | 130.4340 | 131.6234 |
| Frequencies -- | 136.4950 | 138.1919 | 142.3922 |
| Frequencies -- | 147.3284 | 155.2502 | 158.5063 |
| Frequencies -- | 158.8195 | 160.7218 | 162.4212 |
| Frequencies -- | 166.4704 | 172.4991 | 176.7493 |
| Frequencies -- | 196.0019 | 207.6217 | 213.7453 |
| Frequencies -- | 215.1688 | 216.1300 | 223.4006 |
| Frequencies -- | 226.2629 | 237.3390 | 246.5686 |
| Frequencies -- | 251.6580 | 257.1036 | 263.9920 |
| Frequencies -- | 264.1067 | 264.5997 | 271.7980 |
| Frequencies -- | 274.1784 | 274.9502 | 279.9114 |
| Frequencies -- | 288.2096 | 290.3862 | 296.5924 |
| Frequencies -- | 299.2554 | 300.3813 | 300.9786 |
| Frequencies -- | 301.9802 | 305.4817 | 306.6606 |
| Frequencies -- | 315.9999 | 322.4529 | 328.2749 |
| Frequencies -- | 331.4124 | 339.0492 | 346.0227 |
| Frequencies -- | 360.2234 | 361.3207 | 373.7930 |
| Frequencies -- | 376.3293 | 379.9645 | 388.9791 |
| Frequencies -- | 394.4002 | 395.5434 | 410.3452 |
| Frequencies -- | 423.1307 | 427.3842 | 431.1783 |
| Frequencies -- | 432.6998 | 437.5227 | 444.6905 |
| Frequencies -- | 453.9229 | 459.6030 | 467.2282 |
| Frequencies -- | 520.4163 | 532.2900 | 534.7655 |
| Frequencies -- | 536.7415 | 541.6425 | 543.5908 |
| Frequencies -- | 548.3218 | 549.7368 | 556.1597 |
| Frequencies -- | 562.8298 | 581.8654 | 585.0675 |
| Frequencies -- | 595.8278 | 596.1142 | 605.1488 |
| Frequencies -- | 607.3508 | 617.0829 | 625.4636 |
| Frequencies -- | 628.8431 | 633.6255 | 637.1976 |
| Frequencies -- | 642.5548 | 651.6963 | 677.9720 |
| Frequencies -- | 699.8019 | 715.1262 | 723.8003 |
| Frequencies -- | 726.5249 | 736.4697 | 740.6132 |
| Frequencies -- | 747.1413 | 762.7831 | 763.2990 |
| Frequencies -- | 797.0304 | 801.7044 | 804.7609 |
| Frequencies -- | 815.8608 | 821.1120 | 835.7979 |
| Frequencies -- | 859.2452 | 878.8113 | 880.0136 |
| Frequencies -- | 903.4105 | 914.1419 | 922.7489 |
| Frequencies -- | 929.3615 | 931.4115 | 932.7152 |
| Frequencies -- | 941.4146 | 964.0861 | 965.0300 |

|                |           |           |           |
|----------------|-----------|-----------|-----------|
| Frequencies -- | 969.1278  | 973.1764  | 990.4079  |
| Frequencies -- | 991.2151  | 997.4885  | 1021.5835 |
| Frequencies -- | 1027.3514 | 1039.5712 | 1041.9374 |
| Frequencies -- | 1043.1172 | 1046.9011 | 1047.6181 |
| Frequencies -- | 1048.2413 | 1050.9028 | 1053.4567 |
| Frequencies -- | 1056.2178 | 1067.1225 | 1072.8152 |
| Frequencies -- | 1088.1153 | 1090.6486 | 1113.8311 |
| Frequencies -- | 1116.7707 | 1120.4103 | 1126.3402 |
| Frequencies -- | 1164.0329 | 1173.1467 | 1176.2881 |
| Frequencies -- | 1184.3760 | 1194.1479 | 1202.4220 |
| Frequencies -- | 1205.0902 | 1210.8270 | 1213.1117 |
| Frequencies -- | 1257.6979 | 1277.8069 | 1294.8283 |
| Frequencies -- | 1306.8237 | 1318.3017 | 1319.5390 |
| Frequencies -- | 1321.0637 | 1329.2741 | 1339.2018 |
| Frequencies -- | 1340.6549 | 1345.1245 | 1350.0957 |
| Frequencies -- | 1382.1645 | 1399.1435 | 1400.1947 |
| Frequencies -- | 1400.6344 | 1410.4861 | 1411.1595 |
| Frequencies -- | 1416.0652 | 1416.6910 | 1418.0769 |
| Frequencies -- | 1419.9009 | 1421.5169 | 1425.3704 |
| Frequencies -- | 1426.2098 | 1428.7887 | 1431.6419 |
| Frequencies -- | 1434.9456 | 1438.6704 | 1450.6727 |
| Frequencies -- | 1453.3643 | 1464.4678 | 1467.0220 |
| Frequencies -- | 1468.0153 | 1472.0082 | 1474.1864 |
| Frequencies -- | 1481.0454 | 1486.4813 | 1487.1739 |
| Frequencies -- | 1489.2898 | 1491.0566 | 1492.4329 |
| Frequencies -- | 1494.9242 | 1498.8443 | 1500.4325 |
| Frequencies -- | 1501.4589 | 1501.8856 | 1505.5544 |
| Frequencies -- | 1507.4413 | 1508.3199 | 1509.2244 |
| Frequencies -- | 1511.8673 | 1517.9521 | 1521.7714 |
| Frequencies -- | 1591.6428 | 1593.7597 | 1596.0888 |
| Frequencies -- | 1597.5047 | 1606.0603 | 1617.3036 |
| Frequencies -- | 1619.1987 | 1630.1631 | 3007.6997 |
| Frequencies -- | 3008.6898 | 3009.4922 | 3011.2907 |
| Frequencies -- | 3012.1257 | 3012.9365 | 3013.7498 |
| Frequencies -- | 3013.9449 | 3014.5991 | 3015.0655 |
| Frequencies -- | 3078.4982 | 3083.0361 | 3098.5142 |
| Frequencies -- | 3098.9733 | 3104.9014 | 3105.7172 |
| Frequencies -- | 3106.9937 | 3107.7077 | 3107.9736 |
| Frequencies -- | 3112.5590 | 3114.2058 | 3122.6666 |
| Frequencies -- | 3124.1012 | 3132.2786 | 3134.2725 |
| Frequencies -- | 3137.2425 | 3142.2139 | 3146.8285 |
| Frequencies -- | 3151.4147 | 3152.5555 | 3164.3317 |
| Frequencies -- | 3165.3016 | 3185.1265 | 3199.0738 |

**Catalyst 13:****distal conformation**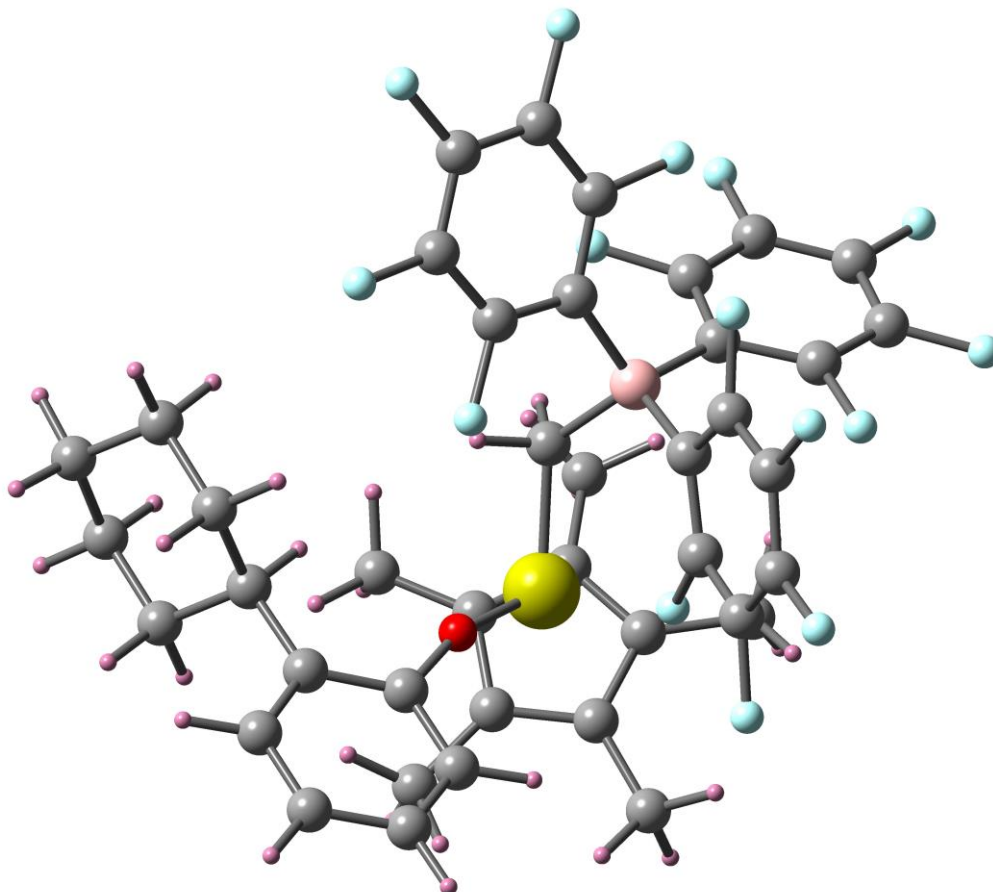

| <b>vacuum</b> | <b>toluene-like solvent</b> | <b>D3 dispersion</b> |
|---------------|-----------------------------|----------------------|
| -3236.4587104 | -3236.4687323               | -0.62873030          |

|    |             |             |             |
|----|-------------|-------------|-------------|
| Ti | -1.05854900 | -1.67708100 | -0.46904600 |
| O  | -2.50621300 | -0.89557600 | 0.24034200  |
| C  | -3.68946800 | -0.65050900 | 0.93478000  |
| C  | -4.64147300 | 0.29587000  | 0.45109200  |
| C  | -3.89328000 | -1.35651700 | 2.14892100  |
| C  | -5.80282000 | 0.48623400  | 1.24478400  |
| C  | -5.05369300 | -1.13480700 | 2.91087500  |
| C  | -6.01631800 | -0.20829600 | 2.45171500  |
| H  | -6.55490000 | 1.20267900  | 0.91187100  |
| H  | -5.20027500 | -1.67328100 | 3.84939400  |
| H  | -6.92219900 | -0.02484300 | 3.03276900  |
| C  | -1.59229400 | -2.69330500 | -2.54206200 |
| C  | -0.17005000 | -2.93778400 | -2.38493700 |
| C  | -2.30045300 | -3.43061800 | -1.51094500 |
| C  | 0.00308000  | -3.75742500 | -1.21456000 |
| C  | -1.31307500 | -4.06168400 | -0.67272800 |
| F  | 0.65858000  | -0.67019200 | 5.89864800  |
| C  | 0.85886700  | -0.43465500 | 4.54885200  |

|   |             |             |             |
|---|-------------|-------------|-------------|
| C | 1.62741100  | 0.65945100  | 4.11090200  |
| C | 0.31113200  | -1.29294800 | 3.58345600  |
| C | 1.81009700  | 0.88803900  | 2.73218700  |
| F | 2.20613800  | 1.50158400  | 5.04812900  |
| C | 0.53853800  | -0.98839500 | 2.23350500  |
| F | -0.43348000 | -2.40667000 | 3.95938500  |
| C | 1.25098300  | 0.08766900  | 1.70047500  |
| F | 2.64570700  | 1.95872300  | 2.41602300  |
| F | 0.01055000  | -2.01267400 | 1.33721400  |
| B | 1.44852100  | 0.42378400  | 0.05995700  |
| C | 1.39761800  | 2.09855500  | -0.07127200 |
| C | 2.87027600  | -0.23570000 | -0.52064800 |
| C | 0.18812100  | -0.14930500 | -0.95210800 |
| C | 2.45387000  | 2.95852300  | -0.45713100 |
| C | 0.20865900  | 2.80146800  | 0.23805900  |
| C | 3.76677800  | -1.06206300 | 0.19555500  |
| C | 3.28336200  | -0.02418300 | -1.86171300 |
| H | -0.62668900 | 0.60083900  | -0.96061500 |
| H | 0.59661900  | -0.20440000 | -1.96560200 |
| C | 2.33063000  | 4.35526000  | -0.60449200 |
| F | 3.74436500  | 2.46290200  | -0.66996500 |
| C | 0.03422200  | 4.19194000  | 0.11948900  |
| F | -0.90572100 | 2.09902000  | 0.74071300  |
| C | 4.95215000  | -1.61480300 | -0.33567600 |
| F | 3.52184700  | -1.41043300 | 1.53477500  |
| C | 4.45170200  | -0.54806900 | -2.44107800 |
| F | 2.51229300  | 0.78383700  | -2.71233800 |
| C | 1.10622300  | 4.98259200  | -0.32411500 |
| F | 3.41816600  | 5.12279200  | -1.00595000 |
| F | -1.18445100 | 4.78779400  | 0.43801900  |
| C | 5.30419900  | -1.35474000 | -1.66817700 |
| F | 5.76950700  | -2.42154500 | 0.44942600  |
| F | 4.77172900  | -0.27834200 | -3.76764200 |
| F | 0.96248400  | 6.35567000  | -0.46511600 |
| F | 6.46141100  | -1.89035100 | -2.21497800 |
| C | 1.30946600  | -4.31340400 | -0.69714800 |
| H | 1.30189200  | -4.45752500 | 0.39171900  |
| H | 1.50615600  | -5.29937100 | -1.15318500 |
| H | 2.16155400  | -3.66774400 | -0.94084700 |
| C | 0.89132400  | -2.57161700 | -3.39330100 |
| H | 1.89830900  | -2.58419000 | -2.96245800 |
| H | 0.88090000  | -3.30404200 | -4.21940000 |
| H | 0.73033600  | -1.58146100 | -3.84018800 |
| C | -2.22797900 | -1.95446900 | -3.69856400 |
| H | -1.62355500 | -1.09772000 | -4.02830800 |
| H | -2.32984600 | -2.63021300 | -4.56579900 |
| H | -3.23333600 | -1.58599900 | -3.45735900 |
| C | -3.80136100 | -3.57461200 | -1.40883800 |
| H | -4.32539700 | -2.63157900 | -1.61143800 |
| H | -4.15538200 | -4.31476100 | -2.14705600 |
| H | -4.12070300 | -3.92131900 | -0.41809000 |
| C | -1.58535800 | -4.96634700 | 0.50908800  |
| H | -2.55906100 | -4.76436000 | 0.97532000  |
| H | -1.59571500 | -6.02027500 | 0.18121200  |
| H | -0.81690000 | -4.88095400 | 1.28988400  |
| H | -3.13470000 | -2.06119300 | 2.49121100  |
| C | -4.43977200 | 1.08453000  | -0.84586300 |

|   |             |             |             |
|---|-------------|-------------|-------------|
| C | -5.55168500 | 0.79503700  | -1.90387100 |
| C | -4.33832700 | 2.62215400  | -0.59111900 |
| H | -3.48089500 | 0.77208500  | -1.28568900 |
| C | -5.30245900 | 1.57220200  | -3.22224700 |
| H | -6.53498400 | 1.08565600  | -1.49643300 |
| H | -5.60741600 | -0.28830000 | -2.10819400 |
| C | -4.08165400 | 3.39753700  | -1.90753700 |
| H | -5.27597700 | 2.98467700  | -0.13611100 |
| H | -3.53339400 | 2.82687100  | 0.12939300  |
| C | -5.16204600 | 3.09506900  | -2.97486500 |
| H | -6.12797600 | 1.37663600  | -3.92837900 |
| H | -4.38015800 | 1.19596300  | -3.70256900 |
| H | -4.04809900 | 4.47929300  | -1.69559100 |
| H | -3.08656600 | 3.12610200  | -2.30510700 |
| H | -4.91617000 | 3.60892700  | -3.91976200 |
| H | -6.13328500 | 3.50100300  | -2.63763400 |

### proximal conformation

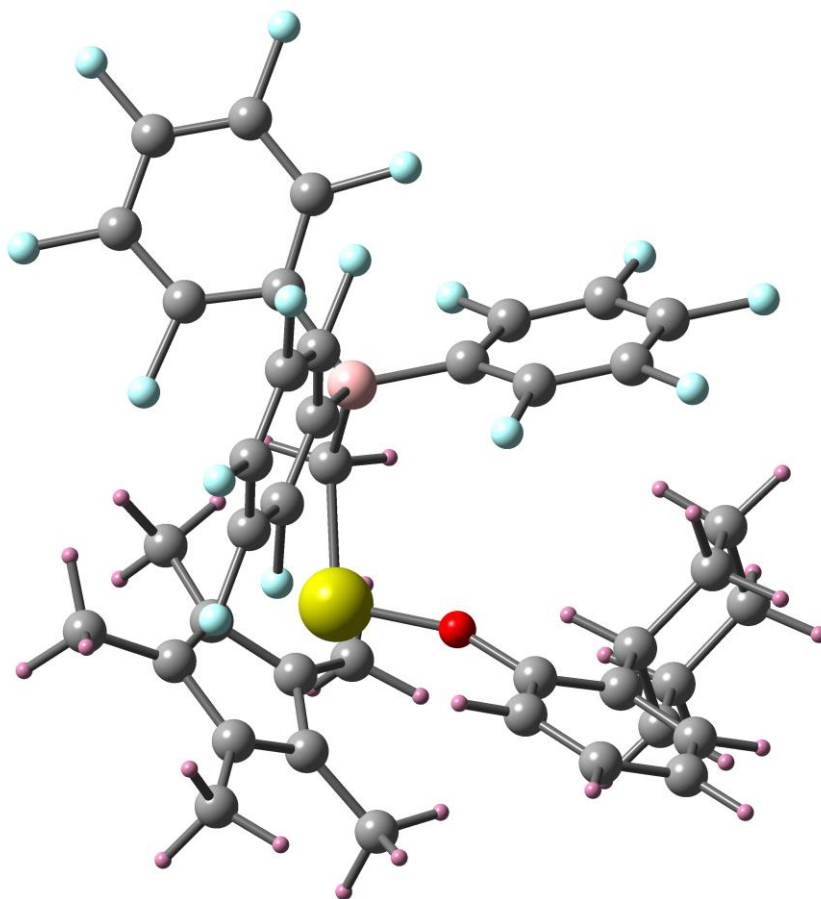

| vacuum        | toluene-like solvent | D3 dispersion |
|---------------|----------------------|---------------|
| -3236.4607674 | -3236.4710258        | -0.63078533   |

|    |            |             |             |
|----|------------|-------------|-------------|
| Ti | 0.86950200 | -1.78285500 | -0.65464400 |
| O  | 2.12335100 | -0.93325200 | 0.30669800  |
| C  | 3.15216900 | -0.76155400 | 1.23774500  |

|   |             |             |             |
|---|-------------|-------------|-------------|
| C | 3.00574500  | -1.42698700 | 2.48288800  |
| C | 4.28367300  | 0.06164400  | 0.96098700  |
| C | 3.98576600  | -1.29331900 | 3.48084800  |
| C | 5.25329300  | 0.16887200  | 1.99348900  |
| C | 5.12066800  | -0.49068000 | 3.23050900  |
| H | 3.85962500  | -1.79929400 | 4.43998800  |
| H | 6.13247800  | 0.79233000  | 1.82583800  |
| H | 5.88973800  | -0.37199100 | 3.99609100  |
| C | 0.40583500  | -2.88185900 | -2.80943700 |
| C | 1.81887500  | -2.56943000 | -2.67533800 |
| C | 0.06972300  | -3.83052700 | -1.78375800 |
| C | 2.36704600  | -3.38646200 | -1.60732600 |
| C | 1.27841000  | -4.13412400 | -1.03221700 |
| F | -3.42294800 | -2.61627000 | 4.63348600  |
| C | -2.92624600 | -1.90855800 | 3.55162800  |
| C | -3.37044200 | -0.60036900 | 3.27744400  |
| C | -1.96376500 | -2.47816100 | 2.70559800  |
| C | -2.85425100 | 0.09739900  | 2.17020200  |
| F | -4.30770200 | -0.01132400 | 4.11252500  |
| C | -1.50205400 | -1.70936300 | 1.62407100  |
| F | -1.48428300 | -3.76414100 | 2.93547900  |
| C | -1.88762700 | -0.41921300 | 1.26519000  |
| F | -3.32310000 | 1.39884500  | 2.00325300  |
| F | -0.49325000 | -2.41745900 | 0.84566800  |
| B | -1.38762400 | 0.47004600  | -0.07899100 |
| C | -2.85004700 | 0.82362400  | -0.84053800 |
| C | -0.51895800 | 1.81132300  | 0.37616300  |
| C | -0.43772900 | -0.34581900 | -1.24049600 |
| C | -3.48014400 | 2.08717300  | -0.95563400 |
| C | -3.60924500 | -0.21754000 | -1.42578200 |
| C | 0.01170300  | 2.07065200  | 1.65938800  |
| C | -0.17909400 | 2.80984300  | -0.57107800 |
| H | -1.07324300 | -0.68470800 | -2.06233300 |
| H | 0.28097200  | 0.38724900  | -1.65940300 |
| C | -4.69664900 | 2.31014100  | -1.63448800 |
| F | -2.93610000 | 3.22187600  | -0.35069700 |
| C | -4.82770400 | -0.05325100 | -2.10873500 |
| F | -3.16331000 | -1.55281700 | -1.31898500 |
| C | 0.74145500  | 3.22691600  | 2.00557200  |
| F | -0.14373100 | 1.14390300  | 2.70478800  |
| C | 0.54342200  | 3.97940300  | -0.28111100 |
| F | -0.58654100 | 2.66739900  | -1.90741500 |
| C | -5.37665400 | 1.23367700  | -2.22660400 |
| F | -5.23957700 | 3.58742300  | -1.71061900 |
| F | -5.49046500 | -1.14786100 | -2.65920800 |
| C | 1.00148600  | 4.19938100  | 1.02886900  |
| F | 1.22315600  | 3.40112200  | 3.29876600  |
| F | 0.82295100  | 4.91195300  | -1.27548900 |
| F | -6.57319100 | 1.43306200  | -2.90031600 |
| F | 1.73228000  | 5.33871900  | 1.33919600  |
| C | 3.82670200  | -3.52201100 | -1.24241200 |
| H | 3.97992100  | -3.72068600 | -0.17318000 |
| H | 4.26775100  | -4.36785300 | -1.79813700 |
| H | 4.40673000  | -2.62791900 | -1.49723500 |
| C | 2.59932400  | -1.68615400 | -3.62381700 |
| H | 2.05335700  | -0.76451500 | -3.87190300 |
| H | 3.57948300  | -1.40308000 | -3.22338400 |

|                |             |             |             |
|----------------|-------------|-------------|-------------|
| H              | 2.77269100  | -2.22211100 | -4.57307100 |
| C              | -0.48799600 | -2.42618600 | -3.93748600 |
| H              | -0.25465400 | -1.40613700 | -4.27206800 |
| H              | -0.35594400 | -3.09226200 | -4.80803600 |
| H              | -1.55014300 | -2.45531800 | -3.66440800 |
| C              | -1.27246800 | -4.49583200 | -1.58748600 |
| H              | -2.10639600 | -3.84980500 | -1.88517500 |
| H              | -1.32718200 | -5.41021300 | -2.20424700 |
| H              | -1.43829000 | -4.80146000 | -0.54583300 |
| C              | 1.38566000  | -5.14371400 | 0.08962900  |
| H              | 0.49547700  | -5.15380600 | 0.73374900  |
| H              | 1.49278500  | -6.16027300 | -0.32700700 |
| H              | 2.26046400  | -4.96271200 | 0.72887300  |
| H              | 2.11343300  | -2.02748100 | 2.66414000  |
| C              | 4.46612300  | 0.82435700  | -0.35594700 |
| C              | 4.42769200  | 2.37103300  | -0.13980500 |
| C              | 5.78029600  | 0.43171300  | -1.10329300 |
| H              | 3.62260000  | 0.57251900  | -1.01682500 |
| C              | 4.57858100  | 3.14385700  | -1.47394300 |
| H              | 5.24043500  | 2.66833700  | 0.54448700  |
| H              | 3.48659100  | 2.64893000  | 0.35561000  |
| C              | 5.93917500  | 1.20515500  | -2.43745100 |
| H              | 6.65037300  | 0.64925500  | -0.46137900 |
| H              | 5.79851300  | -0.65468600 | -1.29132900 |
| C              | 5.86905200  | 2.73773400  | -2.22592300 |
| H              | 4.58119800  | 4.22797900  | -1.27188200 |
| H              | 3.70158700  | 2.94792800  | -2.11716700 |
| H              | 6.89806800  | 0.93063100  | -2.91004500 |
| H              | 5.14219300  | 0.90017800  | -3.14047300 |
| H              | 5.91879200  | 3.25507800  | -3.19895400 |
| H              | 6.75034600  | 3.06790200  | -1.64634400 |
| Frequencies -- | 7.4162      | 18.6146     | 23.0598     |
| Frequencies -- | 23.9519     | 27.5909     | 29.4323     |
| Frequencies -- | 31.7262     | 34.0496     | 38.5537     |
| Frequencies -- | 42.8257     | 45.3409     | 49.0325     |
| Frequencies -- | 54.5120     | 57.6776     | 60.7887     |
| Frequencies -- | 73.8487     | 78.5972     | 85.0698     |
| Frequencies -- | 91.5705     | 93.1683     | 95.9672     |
| Frequencies -- | 108.8365    | 109.6038    | 112.5780    |
| Frequencies -- | 113.6898    | 120.4637    | 122.8470    |
| Frequencies -- | 128.0844    | 133.3791    | 138.0597    |
| Frequencies -- | 142.1400    | 143.2345    | 147.7686    |
| Frequencies -- | 156.0595    | 158.9669    | 160.8815    |
| Frequencies -- | 163.0995    | 163.8163    | 170.5843    |
| Frequencies -- | 174.0936    | 198.0979    | 211.5673    |
| Frequencies -- | 214.2561    | 218.5848    | 222.4942    |
| Frequencies -- | 224.7024    | 226.6122    | 250.2651    |
| Frequencies -- | 258.4235    | 264.1545    | 264.6686    |
| Frequencies -- | 264.9476    | 274.0943    | 275.2502    |
| Frequencies -- | 277.6561    | 280.2585    | 287.3473    |
| Frequencies -- | 291.8942    | 298.3488    | 301.6528    |
| Frequencies -- | 304.5783    | 304.9386    | 310.5497    |
| Frequencies -- | 312.2553    | 324.2377    | 329.9234    |
| Frequencies -- | 336.7273    | 337.8756    | 354.1745    |
| Frequencies -- | 356.3024    | 362.4394    | 373.8056    |
| Frequencies -- | 376.3770    | 376.6829    | 379.6285    |
| Frequencies -- | 390.2761    | 394.1630    | 405.2117    |
| Frequencies -- | 412.8235    | 430.9622    | 432.6740    |



|                |           |           |           |
|----------------|-----------|-----------|-----------|
| Frequencies -- | 436.4209  | 438.0333  | 444.3156  |
| Frequencies -- | 454.2987  | 459.0252  | 467.3942  |
| Frequencies -- | 489.3538  | 495.8746  | 512.2296  |
| Frequencies -- | 519.0471  | 534.3385  | 536.3620  |
| Frequencies -- | 540.5680  | 542.4911  | 548.2372  |
| Frequencies -- | 554.5964  | 555.7150  | 565.8358  |
| Frequencies -- | 580.7006  | 589.5453  | 599.8846  |
| Frequencies -- | 602.6334  | 610.9106  | 618.5590  |
| Frequencies -- | 624.3867  | 633.3589  | 635.8944  |
| Frequencies -- | 641.1197  | 656.4902  | 667.6658  |
| Frequencies -- | 676.7094  | 702.7568  | 717.4655  |
| Frequencies -- | 729.0494  | 734.1891  | 742.3455  |
| Frequencies -- | 742.9873  | 746.3163  | 763.7770  |
| Frequencies -- | 764.9499  | 769.0751  | 789.6020  |
| Frequencies -- | 800.6050  | 803.6594  | 819.8248  |
| Frequencies -- | 821.8178  | 839.5082  | 862.3936  |
| Frequencies -- | 866.3388  | 868.5041  | 874.8384  |
| Frequencies -- | 888.6173  | 900.5089  | 905.9254  |
| Frequencies -- | 912.3624  | 923.6726  | 928.1423  |
| Frequencies -- | 957.2957  | 968.7273  | 970.7616  |
| Frequencies -- | 975.4451  | 993.0084  | 998.6384  |
| Frequencies -- | 1003.5798 | 1022.0092 | 1033.6743 |
| Frequencies -- | 1037.5646 | 1043.1938 | 1044.0807 |
| Frequencies -- | 1044.9905 | 1047.7514 | 1049.1899 |
| Frequencies -- | 1051.1700 | 1054.3742 | 1056.9839 |
| Frequencies -- | 1057.7131 | 1058.4984 | 1085.2327 |
| Frequencies -- | 1087.8162 | 1089.7806 | 1094.1815 |
| Frequencies -- | 1096.1130 | 1116.7887 | 1126.0027 |
| Frequencies -- | 1153.2364 | 1173.4839 | 1175.3594 |
| Frequencies -- | 1184.3743 | 1191.1459 | 1198.0811 |
| Frequencies -- | 1202.3741 | 1209.4655 | 1213.7934 |
| Frequencies -- | 1219.2725 | 1249.5265 | 1277.5242 |
| Frequencies -- | 1281.5356 | 1294.2459 | 1297.8399 |
| Frequencies -- | 1315.4849 | 1318.9123 | 1321.6026 |
| Frequencies -- | 1327.9670 | 1338.7393 | 1345.2921 |
| Frequencies -- | 1349.7133 | 1351.2122 | 1355.7656 |
| Frequencies -- | 1361.6845 | 1362.2625 | 1370.4044 |
| Frequencies -- | 1387.4285 | 1390.7962 | 1408.7081 |
| Frequencies -- | 1411.6964 | 1414.4561 | 1416.2807 |
| Frequencies -- | 1421.5420 | 1421.7469 | 1425.9628 |
| Frequencies -- | 1428.2861 | 1429.7118 | 1434.2773 |
| Frequencies -- | 1445.7379 | 1447.1011 | 1454.8402 |
| Frequencies -- | 1464.0397 | 1467.0052 | 1468.4898 |
| Frequencies -- | 1471.7705 | 1479.0597 | 1480.8682 |
| Frequencies -- | 1482.2408 | 1486.2861 | 1487.1304 |
| Frequencies -- | 1489.2438 | 1491.5117 | 1493.3611 |
| Frequencies -- | 1497.3729 | 1498.8814 | 1499.8297 |
| Frequencies -- | 1505.4756 | 1506.3902 | 1510.7221 |
| Frequencies -- | 1516.4258 | 1522.9584 | 1587.5557 |
| Frequencies -- | 1590.7149 | 1593.7865 | 1597.4141 |
| Frequencies -- | 1614.4063 | 1617.1312 | 1620.8490 |
| Frequencies -- | 1630.7409 | 2991.4581 | 2998.3847 |
| Frequencies -- | 3004.7892 | 3007.3550 | 3010.1337 |
| Frequencies -- | 3010.7723 | 3011.9812 | 3012.2216 |
| Frequencies -- | 3013.5081 | 3019.4325 | 3026.9401 |
| Frequencies -- | 3055.8126 | 3061.0014 | 3069.7963 |
| Frequencies -- | 3078.6462 | 3087.4434 | 3097.9018 |
| Frequencies -- | 3099.6994 | 3102.0698 | 3105.8303 |
| Frequencies -- | 3107.2868 | 3111.5419 | 3137.1371 |
| Frequencies -- | 3147.3577 | 3152.9139 | 3159.0423 |
| Frequencies -- | 3160.9879 | 3165.6773 | 3172.5288 |
| Frequencies -- | 3177.4967 | 3190.2192 | 3202.3612 |

**Catalyst 14:**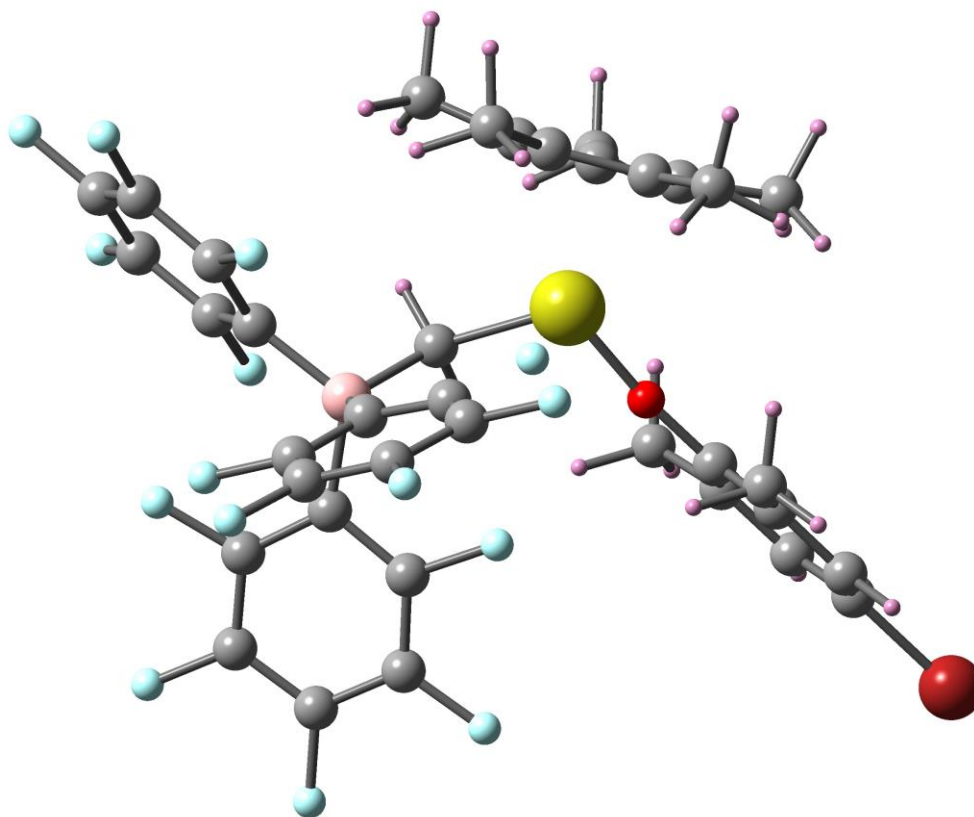

| <b>vacuum</b> | <b>toluene-like solvent</b> | <b>D3 dispersion</b> |
|---------------|-----------------------------|----------------------|
| -3093.0628836 | -3093.0734325               | -0.57120437          |

|    |             |             |             |
|----|-------------|-------------|-------------|
| Ti | -0.70551900 | -1.81699600 | -0.22430700 |
| O  | -2.28995500 | -0.99333400 | -0.32529400 |
| C  | -3.58062300 | -0.48582400 | -0.36583000 |
| C  | -4.08911100 | 0.02356700  | -1.59638900 |
| C  | -4.34454700 | -0.45130600 | 0.83798700  |
| C  | -5.40627500 | 0.53727700  | -1.61161700 |
| C  | -5.65549600 | 0.07464100  | 0.78334000  |
| C  | -6.17564700 | 0.55277500  | -0.43345700 |
| H  | -5.81472600 | 0.93052700  | -2.54194000 |
| H  | -6.25381400 | 0.11420400  | 1.69281100  |
| C  | -0.62216200 | -3.60553200 | -1.80892900 |
| C  | 0.69952600  | -3.60528500 | -1.21119500 |
| C  | -1.58582500 | -3.96494500 | -0.78461100 |
| C  | 0.54870400  | -3.90306100 | 0.18779500  |
| C  | -0.86216100 | -4.12309100 | 0.45415400  |
| F  | 1.85020400  | 0.22713000  | 5.84333900  |
| C  | 1.81460900  | 0.26180400  | 4.45952100  |
| C  | 2.69117800  | 1.09217500  | 3.73401800  |
| C  | 0.90396200  | -0.53185800 | 3.74711300  |
| C  | 2.63571500  | 1.11046100  | 2.32860100  |
| F  | 3.60382600  | 1.88070200  | 4.41764500  |
| C  | 0.91773100  | -0.45255700 | 2.34392200  |
| F  | 0.01643400  | -1.37131300 | 4.41314300  |

|    |             |             |             |
|----|-------------|-------------|-------------|
| C  | 1.74580900  | 0.32973800  | 1.54096500  |
| F  | 3.54888500  | 1.95098900  | 1.69596800  |
| F  | -0.07404700 | -1.33050400 | 1.74214700  |
| B  | 1.70664600  | 0.49520700  | -0.13690600 |
| C  | 1.24006800  | 2.10297400  | -0.29655900 |
| C  | 3.18118500  | 0.13883500  | -0.82016600 |
| C  | 0.61616500  | -0.48838200 | -1.03160600 |
| C  | 2.03474600  | 3.19610300  | -0.72120500 |
| C  | -0.06977100 | 2.49037000  | 0.07253300  |
| C  | 4.21598200  | -0.61373500 | -0.22389300 |
| C  | 3.45295900  | 0.47039400  | -2.17164400 |
| H  | -0.13142000 | 0.18023200  | -1.49837600 |
| H  | 1.19432900  | -0.94045400 | -1.84425700 |
| C  | 1.56341600  | 4.52151200  | -0.83348600 |
| F  | 3.38365300  | 3.02930800  | -1.03916800 |
| C  | -0.58992600 | 3.79410300  | -0.01571000 |
| F  | -0.95002300 | 1.52802500  | 0.60613900  |
| C  | 5.43148300  | -0.95072000 | -0.85529500 |
| F  | 4.07033100  | -1.12799300 | 1.07987600  |
| C  | 4.64590400  | 0.16446100  | -2.84921700 |
| F  | 2.48180100  | 1.13987200  | -2.92899800 |
| C  | 0.23704700  | 4.82683700  | -0.48742000 |
| F  | 2.40543600  | 5.53477600  | -1.27565200 |
| F  | -1.90025100 | 4.06786100  | 0.36512100  |
| C  | 5.65743600  | -0.54725000 | -2.17998700 |
| F  | 6.39756800  | -1.69355800 | -0.18310600 |
| F  | 4.83286600  | 0.54832700  | -4.17258900 |
| F  | -0.24329900 | 6.12391100  | -0.59384900 |
| F  | 6.84362300  | -0.86626600 | -2.82563200 |
| C  | -3.25002900 | 0.04957400  | -2.86165500 |
| H  | -2.36904500 | 0.69807900  | -2.73855100 |
| H  | -2.88177400 | -0.95089300 | -3.13044300 |
| H  | -3.83141100 | 0.43360500  | -3.71052600 |
| C  | -3.76705000 | -0.92376100 | 2.15992200  |
| H  | -3.44782500 | -1.97591100 | 2.11722000  |
| H  | -2.88684000 | -0.32521300 | 2.44137800  |
| H  | -4.50622900 | -0.83230000 | 2.96689400  |
| Br | -8.00533700 | 1.27147500  | -0.48418700 |
| C  | 1.67232000  | -4.08926800 | 1.18147800  |
| H  | 1.32351800  | -4.01604300 | 2.21966600  |
| H  | 2.11418100  | -5.09372500 | 1.06049800  |
| H  | 2.48362900  | -3.36281100 | 1.04511400  |
| C  | 2.00097900  | -3.53229300 | -1.97106400 |
| H  | 2.83618600  | -3.21272600 | -1.33786500 |
| H  | 2.25324200  | -4.53343500 | -2.36277300 |
| H  | 1.94908900  | -2.85628500 | -2.83499600 |
| C  | -0.89914200 | -3.45761600 | -3.28844900 |
| H  | -0.32008600 | -2.64216800 | -3.74579800 |
| H  | -0.61686300 | -4.38584900 | -3.81476100 |
| H  | -1.96062600 | -3.27854100 | -3.49940400 |
| C  | -3.05565400 | -4.24341300 | -1.00190600 |
| H  | -3.47121800 | -3.67732700 | -1.84538600 |
| H  | -3.20085100 | -5.31483000 | -1.22440500 |
| H  | -3.66488700 | -4.01003000 | -0.11880400 |
| C  | -1.44186400 | -4.55400300 | 1.78390700  |
| H  | -2.53353600 | -4.44581100 | 1.81465700  |
| H  | -1.21779900 | -5.61966800 | 1.96246100  |

| H              | -1.02350300 | -3.99329000 | 2.63251100 |
|----------------|-------------|-------------|------------|
| Frequencies -- | 7.4086      | 11.2890     | 14.7000    |
| Frequencies -- | 25.0216     | 27.7384     | 31.2134    |
| Frequencies -- | 33.0412     | 36.0356     | 40.5201    |
| Frequencies -- | 45.2900     | 49.6768     | 58.6788    |
| Frequencies -- | 67.2536     | 74.7697     | 76.8921    |
| Frequencies -- | 97.9224     | 102.7546    | 103.2074   |
| Frequencies -- | 105.9314    | 106.4624    | 107.5722   |
| Frequencies -- | 116.9291    | 118.2617    | 122.0978   |
| Frequencies -- | 123.3707    | 127.0211    | 127.8520   |
| Frequencies -- | 135.9251    | 138.0534    | 142.2520   |
| Frequencies -- | 143.5201    | 146.2279    | 148.2082   |
| Frequencies -- | 149.6901    | 157.8316    | 159.5069   |
| Frequencies -- | 161.3599    | 163.8107    | 171.4384   |
| Frequencies -- | 174.7596    | 180.2751    | 189.4714   |
| Frequencies -- | 207.4604    | 213.7989    | 215.1443   |
| Frequencies -- | 223.9556    | 224.1624    | 237.4425   |
| Frequencies -- | 242.1910    | 258.6826    | 263.1645   |
| Frequencies -- | 264.0627    | 264.6153    | 265.8873   |
| Frequencies -- | 274.2687    | 275.5631    | 279.3972   |
| Frequencies -- | 286.1512    | 292.3510    | 296.5681   |
| Frequencies -- | 300.9322    | 302.7116    | 303.2917   |
| Frequencies -- | 305.4574    | 323.9769    | 326.4734   |
| Frequencies -- | 333.0798    | 339.5460    | 347.1362   |
| Frequencies -- | 349.8596    | 359.2644    | 373.6474   |
| Frequencies -- | 376.2357    | 379.8683    | 386.1299   |
| Frequencies -- | 389.9724    | 395.7486    | 399.5081   |
| Frequencies -- | 403.8593    | 424.5474    | 430.9969   |
| Frequencies -- | 432.9237    | 444.8774    | 454.5373   |
| Frequencies -- | 460.0286    | 467.6522    | 500.7284   |
| Frequencies -- | 507.5233    | 521.0876    | 532.6560   |
| Frequencies -- | 536.5203    | 541.9964    | 546.2978   |
| Frequencies -- | 549.5145    | 555.6699    | 559.4439   |
| Frequencies -- | 565.7540    | 571.6355    | 575.8267   |
| Frequencies -- | 581.7764    | 589.9956    | 600.4917   |
| Frequencies -- | 604.9206    | 612.7680    | 624.5343   |
| Frequencies -- | 633.0447    | 636.7873    | 643.2470   |
| Frequencies -- | 652.2406    | 680.9722    | 698.5781   |
| Frequencies -- | 714.3662    | 726.3942    | 732.9500   |
| Frequencies -- | 737.0687    | 741.4945    | 746.4281   |
| Frequencies -- | 762.8302    | 798.0198    | 801.0163   |
| Frequencies -- | 805.4364    | 818.6149    | 835.7832   |
| Frequencies -- | 862.9596    | 883.4050    | 884.5327   |
| Frequencies -- | 887.4759    | 903.2279    | 915.6559   |
| Frequencies -- | 926.8243    | 950.6165    | 966.3662   |
| Frequencies -- | 973.8460    | 985.2733    | 1000.9210  |
| Frequencies -- | 1010.4539   | 1023.7079   | 1030.0683  |
| Frequencies -- | 1038.4959   | 1042.0254   | 1043.6437  |
| Frequencies -- | 1046.8250   | 1047.5404   | 1049.8689  |
| Frequencies -- | 1050.8567   | 1052.1009   | 1053.9062  |
| Frequencies -- | 1054.1630   | 1057.5827   | 1074.5525  |
| Frequencies -- | 1087.4901   | 1090.4501   | 1123.1629  |
| Frequencies -- | 1125.7331   | 1172.4946   | 1176.4663  |
| Frequencies -- | 1202.8500   | 1211.8331   | 1214.0252  |
| Frequencies -- | 1217.3224   | 1262.6359   | 1288.3456  |
| Frequencies -- | 1295.0063   | 1319.0567   | 1320.6953  |
| Frequencies -- | 1339.1397   | 1345.4757   | 1351.0440  |
| Frequencies -- | 1354.7792   | 1397.1760   | 1410.2339  |
| Frequencies -- | 1410.8285   | 1413.8984   | 1417.1447  |
| Frequencies -- | 1417.3758   | 1420.5600   | 1422.4285  |
| Frequencies -- | 1424.3116   | 1425.3689   | 1425.5233  |
| Frequencies -- | 1429.0125   | 1432.1326   | 1433.1957  |

|                |           |           |           |
|----------------|-----------|-----------|-----------|
| Frequencies -- | 1435.1601 | 1450.4060 | 1453.1712 |
| Frequencies -- | 1465.4437 | 1466.9580 | 1467.9801 |
| Frequencies -- | 1471.8802 | 1481.9972 | 1487.4390 |
| Frequencies -- | 1489.7200 | 1490.7813 | 1495.3119 |
| Frequencies -- | 1498.2247 | 1499.3327 | 1501.2447 |
| Frequencies -- | 1503.4210 | 1504.8263 | 1508.6782 |
| Frequencies -- | 1510.5623 | 1516.3141 | 1522.7374 |
| Frequencies -- | 1588.9697 | 1591.4324 | 1592.2278 |
| Frequencies -- | 1593.3412 | 1596.0720 | 1616.7556 |
| Frequencies -- | 1619.0741 | 1630.3999 | 3009.9502 |
| Frequencies -- | 3010.4515 | 3011.7132 | 3012.4804 |
| Frequencies -- | 3012.8411 | 3014.0362 | 3023.2320 |
| Frequencies -- | 3026.8552 | 3095.5246 | 3097.6283 |
| Frequencies -- | 3103.2876 | 3104.7964 | 3106.9957 |
| Frequencies -- | 3109.2078 | 3113.6895 | 3136.0518 |
| Frequencies -- | 3137.1218 | 3137.4905 | 3142.1544 |
| Frequencies -- | 3143.8365 | 3147.8169 | 3149.8532 |
| Frequencies -- | 3160.7698 | 3198.8466 | 3202.4445 |

**Catalyst 15:****distal conformation**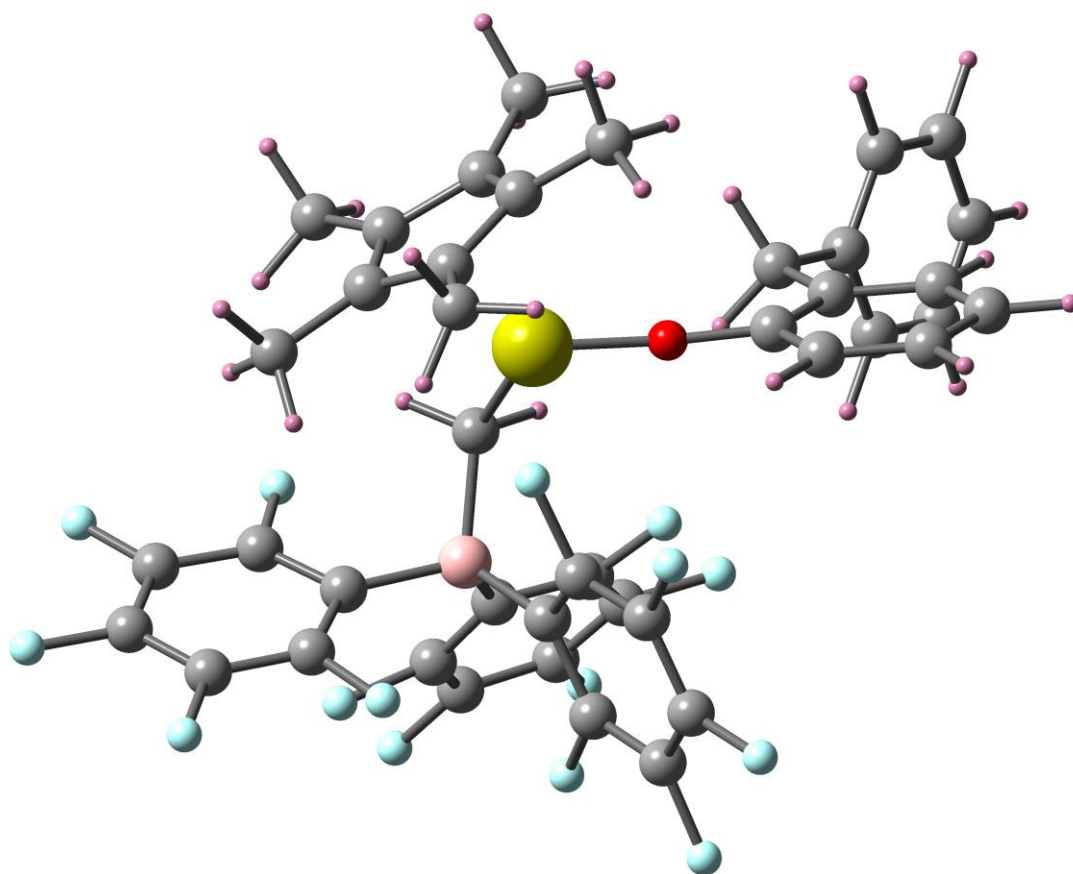

| <b>vacuum</b> | <b>toluene-like solvent</b> | <b>D3 dispersion</b> |
|---------------|-----------------------------|----------------------|
| -3272.153851  | -3272.165333                | -0.61830709          |

|    |             |             |             |
|----|-------------|-------------|-------------|
| Ti | -0.40928000 | -1.98007000 | -0.65291900 |
| O  | -1.99080100 | -1.60062500 | 0.09650500  |
| C  | -3.20186300 | -1.62769000 | 0.78395900  |
| C  | -4.30731400 | -0.85085400 | 0.32429000  |
| C  | -3.28782000 | -2.42196900 | 1.95377900  |
| C  | -5.49773700 | -0.91670100 | 1.08669900  |
| C  | -4.48564800 | -2.46034100 | 2.69160600  |
| C  | -5.59485600 | -1.70568300 | 2.25317100  |
| H  | -6.35878300 | -0.33087600 | 0.76699300  |
| H  | -4.54639800 | -3.06633000 | 3.59788300  |
| H  | -6.52895500 | -1.72421400 | 2.81794000  |
| C  | -0.99788800 | -3.20006400 | -2.57172700 |
| C  | 0.37490300  | -2.78015500 | -2.83414300 |
| C  | -0.98067300 | -4.14316600 | -1.47387200 |
| C  | 1.21835600  | -3.41479400 | -1.86173500 |
| C  | 0.38036100  | -4.23707000 | -1.00303200 |
| F  | 0.29848900  | -0.79934400 | 5.75742900  |
| C  | 0.57183000  | -0.45635400 | 4.44401700  |

|   |             |             |             |
|---|-------------|-------------|-------------|
| C | 0.94556400  | 0.85545900  | 4.10079400  |
| C | 0.49165300  | -1.41538800 | 3.42242200  |
| C | 1.21179200  | 1.18798700  | 2.75638700  |
| F | 1.05668900  | 1.81243200  | 5.09797900  |
| C | 0.76240300  | -0.99733400 | 2.11266400  |
| F | 0.14600100  | -2.73307800 | 3.70632900  |
| C | 1.11189700  | 0.28090800  | 1.66922000  |
| F | 1.64257500  | 2.49831300  | 2.54960500  |
| F | 0.73400000  | -2.09861100 | 1.15227700  |
| B | 1.41437500  | 0.67772100  | 0.06053300  |
| C | 1.01236900  | 2.29482600  | -0.13902700 |
| C | 3.00873200  | 0.35603100  | -0.33832700 |
| C | 0.42732400  | -0.17247400 | -1.05599800 |
| C | 1.89119500  | 3.35784900  | -0.45739000 |
| C | -0.32593200 | 2.72752100  | 0.02206300  |
| C | 4.00500200  | -0.15733000 | 0.52491900  |
| C | 3.49890500  | 0.57931400  | -1.65134300 |
| H | -0.54393500 | 0.35232700  | -1.14227700 |
| H | 0.92049300  | -0.11582400 | -2.02926000 |
| C | 1.48559300  | 4.69172800  | -0.67023900 |
| F | 3.27359100  | 3.15393200  | -0.53217700 |
| C | -0.78236500 | 4.04392800  | -0.16416400 |
| F | -1.31060500 | 1.80923000  | 0.44446700  |
| C | 5.33795700  | -0.42911400 | 0.14759800  |
| F | 3.72660300  | -0.43833400 | 1.87292700  |
| C | 4.81366300  | 0.32819100  | -2.08049300 |
| F | 2.65788400  | 1.13170700  | -2.63205300 |
| C | 0.13355800  | 5.04267800  | -0.53135200 |
| F | 2.41770500  | 5.66994000  | -0.99700800 |
| F | -2.12596700 | 4.36581300  | 0.02003700  |
| C | 5.75202400  | -0.18484400 | -1.16960000 |
| F | 6.24311100  | -0.94007600 | 1.07176400  |
| F | 5.19520200  | 0.58675300  | -3.39333200 |
| F | -0.28651900 | 6.34925000  | -0.73469600 |
| F | 7.05525900  | -0.44721800 | -1.56600000 |
| C | 2.72490200  | -3.34778100 | -1.78568700 |
| H | 3.09183900  | -3.26895300 | -0.75269200 |
| H | 3.16137800  | -4.26820500 | -2.21081100 |
| H | 3.12984200  | -2.50318900 | -2.35309000 |
| C | 0.81570500  | -1.97271000 | -4.03220800 |
| H | 1.79756800  | -1.50632700 | -3.89070500 |
| H | 0.89090900  | -2.63260200 | -4.91413700 |
| H | 0.10390700  | -1.17476800 | -4.28569800 |
| C | -2.18964800 | -2.86825000 | -3.44292000 |
| H | -2.17090600 | -1.82965000 | -3.80299400 |
| H | -2.19469200 | -3.51768500 | -4.33553800 |
| H | -3.14178900 | -3.02682200 | -2.92021500 |
| C | -2.15841800 | -4.94464800 | -0.96923700 |
| H | -3.10720300 | -4.39885500 | -1.05148200 |
| H | -2.25897700 | -5.86808900 | -1.56590200 |
| H | -2.04091500 | -5.24905000 | 0.07909600  |
| C | 0.88373200  | -5.14420200 | 0.09782800  |
| H | 0.12108700  | -5.34160600 | 0.86371900  |
| H | 1.17967500  | -6.11986000 | -0.32515100 |
| H | 1.76511700  | -4.73166500 | 0.60662800  |
| H | -2.41793300 | -2.99174400 | 2.28088000  |
| C | -4.18338000 | -0.01106100 | -0.95536900 |

|   |             |             |             |
|---|-------------|-------------|-------------|
| H | -3.22165100 | 0.51809300  | -0.91890100 |
| H | -4.12018100 | -0.70374900 | -1.81170200 |
| C | -5.29862000 | 0.99884100  | -1.21779700 |
| C | -6.40583500 | 0.67086000  | -2.04024500 |
| C | -5.23780100 | 2.30163100  | -0.66023300 |
| C | -7.42794000 | 1.61174200  | -2.29534100 |
| H | -6.46980500 | -0.32493400 | -2.48801800 |
| C | -6.25670200 | 3.24541600  | -0.91164000 |
| H | -4.38904500 | 2.58305200  | -0.03375800 |
| C | -7.35709200 | 2.90382400  | -1.72951400 |
| H | -8.27071900 | 1.33908900  | -2.93528900 |
| H | -6.18546600 | 4.24559600  | -0.47792200 |
| H | -8.14331900 | 3.63584400  | -1.92873400 |

|                |          |          |          |
|----------------|----------|----------|----------|
| Frequencies -- | 6.3394   | 9.7501   | 18.1046  |
| Frequencies -- | 19.6409  | 21.9776  | 24.1371  |
| Frequencies -- | 30.8448  | 32.5457  | 33.7050  |
| Frequencies -- | 37.2528  | 40.9226  | 45.2594  |
| Frequencies -- | 47.0877  | 51.2065  | 63.9878  |
| Frequencies -- | 76.2723  | 85.1346  | 92.1449  |
| Frequencies -- | 99.5083  | 105.9309 | 108.4554 |
| Frequencies -- | 112.4155 | 115.8120 | 117.9386 |
| Frequencies -- | 119.8985 | 120.7748 | 121.0954 |
| Frequencies -- | 124.2561 | 131.7613 | 138.3514 |
| Frequencies -- | 139.0916 | 143.2793 | 147.9095 |
| Frequencies -- | 150.7147 | 156.5467 | 159.9561 |
| Frequencies -- | 162.1284 | 163.9905 | 166.7438 |
| Frequencies -- | 173.3028 | 180.5140 | 205.3156 |
| Frequencies -- | 211.7176 | 218.0058 | 222.1731 |
| Frequencies -- | 225.8042 | 240.1583 | 249.7717 |
| Frequencies -- | 263.7563 | 264.5847 | 265.0259 |
| Frequencies -- | 269.0668 | 277.1251 | 281.7191 |
| Frequencies -- | 282.7066 | 288.3477 | 292.0795 |
| Frequencies -- | 301.6664 | 303.1538 | 304.8097 |
| Frequencies -- | 305.7092 | 309.0811 | 318.1434 |
| Frequencies -- | 319.9241 | 324.1586 | 332.2402 |
| Frequencies -- | 332.6064 | 334.0057 | 345.0285 |
| Frequencies -- | 373.6285 | 375.7600 | 379.6230 |
| Frequencies -- | 380.1766 | 385.1117 | 389.6876 |
| Frequencies -- | 393.6314 | 398.6595 | 406.5452 |
| Frequencies -- | 414.3178 | 431.9837 | 432.9392 |
| Frequencies -- | 440.6150 | 443.2145 | 452.3543 |
| Frequencies -- | 457.0603 | 461.6325 | 465.8046 |
| Frequencies -- | 480.3867 | 524.4223 | 534.3963 |
| Frequencies -- | 537.1362 | 537.3094 | 538.8692 |
| Frequencies -- | 545.2097 | 548.6776 | 556.7301 |
| Frequencies -- | 563.8094 | 571.8485 | 581.2726 |
| Frequencies -- | 587.6772 | 595.5112 | 608.2787 |
| Frequencies -- | 613.9124 | 619.5203 | 624.2394 |
| Frequencies -- | 625.3826 | 634.7547 | 637.4309 |
| Frequencies -- | 641.6534 | 653.1994 | 658.0306 |
| Frequencies -- | 676.5000 | 696.7924 | 707.1494 |
| Frequencies -- | 711.5431 | 720.1212 | 729.0158 |
| Frequencies -- | 731.3904 | 743.8362 | 746.4892 |
| Frequencies -- | 747.5820 | 764.7783 | 767.7260 |
| Frequencies -- | 802.1643 | 803.8143 | 807.1019 |
| Frequencies -- | 815.4747 | 832.3027 | 842.6824 |
| Frequencies -- | 852.2193 | 863.2494 | 865.4326 |
| Frequencies -- | 876.5604 | 904.9232 | 912.7665 |
| Frequencies -- | 930.7535 | 932.6354 | 938.3753 |
| Frequencies -- | 964.4669 | 968.7329 | 972.5862 |



|                |           |           |           |
|----------------|-----------|-----------|-----------|
| Frequencies -- | 988.6132  | 991.3371  | 995.1780  |
| Frequencies -- | 997.3263  | 1007.5427 | 1021.7610 |
| Frequencies -- | 1022.7433 | 1030.6212 | 1041.3778 |
| Frequencies -- | 1041.8218 | 1044.2510 | 1045.6048 |
| Frequencies -- | 1046.0464 | 1048.0431 | 1049.2861 |
| Frequencies -- | 1052.0312 | 1054.6388 | 1055.4109 |
| Frequencies -- | 1064.7175 | 1086.9581 | 1090.8401 |
| Frequencies -- | 1093.5368 | 1107.6767 | 1126.3179 |
| Frequencies -- | 1173.4830 | 1175.3395 | 1180.4780 |
| Frequencies -- | 1182.3652 | 1190.8653 | 1202.0212 |
| Frequencies -- | 1203.3669 | 1205.8776 | 1209.8783 |
| Frequencies -- | 1212.3836 | 1222.2859 | 1241.7919 |
| Frequencies -- | 1284.5209 | 1297.9783 | 1314.7553 |
| Frequencies -- | 1317.8501 | 1318.7550 | 1336.8795 |
| Frequencies -- | 1341.1575 | 1343.7920 | 1350.6616 |
| Frequencies -- | 1374.7389 | 1380.2512 | 1392.3755 |
| Frequencies -- | 1408.3153 | 1411.4375 | 1413.3619 |
| Frequencies -- | 1414.8664 | 1418.7191 | 1422.4829 |
| Frequencies -- | 1427.0270 | 1429.5415 | 1430.1463 |
| Frequencies -- | 1436.7680 | 1444.8839 | 1449.0842 |
| Frequencies -- | 1453.4924 | 1455.6262 | 1465.0735 |
| Frequencies -- | 1468.4711 | 1469.8242 | 1474.0309 |
| Frequencies -- | 1478.8379 | 1481.7514 | 1489.1112 |
| Frequencies -- | 1491.4878 | 1495.4958 | 1496.9296 |
| Frequencies -- | 1498.6047 | 1501.2633 | 1503.3273 |
| Frequencies -- | 1505.5276 | 1509.0810 | 1514.9394 |
| Frequencies -- | 1527.3285 | 1587.5325 | 1588.4988 |
| Frequencies -- | 1594.2668 | 1595.8860 | 1604.2899 |
| Frequencies -- | 1613.6085 | 1617.9098 | 1620.1293 |
| Frequencies -- | 1627.3836 | 1632.1856 | 3003.8316 |
| Frequencies -- | 3008.8803 | 3011.1510 | 3012.2341 |
| Frequencies -- | 3012.9268 | 3015.3476 | 3027.0444 |
| Frequencies -- | 3096.1598 | 3101.4085 | 3102.5788 |
| Frequencies -- | 3102.6912 | 3105.0181 | 3107.9665 |
| Frequencies -- | 3136.6104 | 3139.6851 | 3143.5674 |
| Frequencies -- | 3146.6821 | 3152.4947 | 3157.5253 |
| Frequencies -- | 3165.6590 | 3166.4663 | 3169.4861 |
| Frequencies -- | 3179.3201 | 3182.0070 | 3182.8859 |
| Frequencies -- | 3194.8026 | 3200.2271 | 3207.4884 |

**proximal conformation**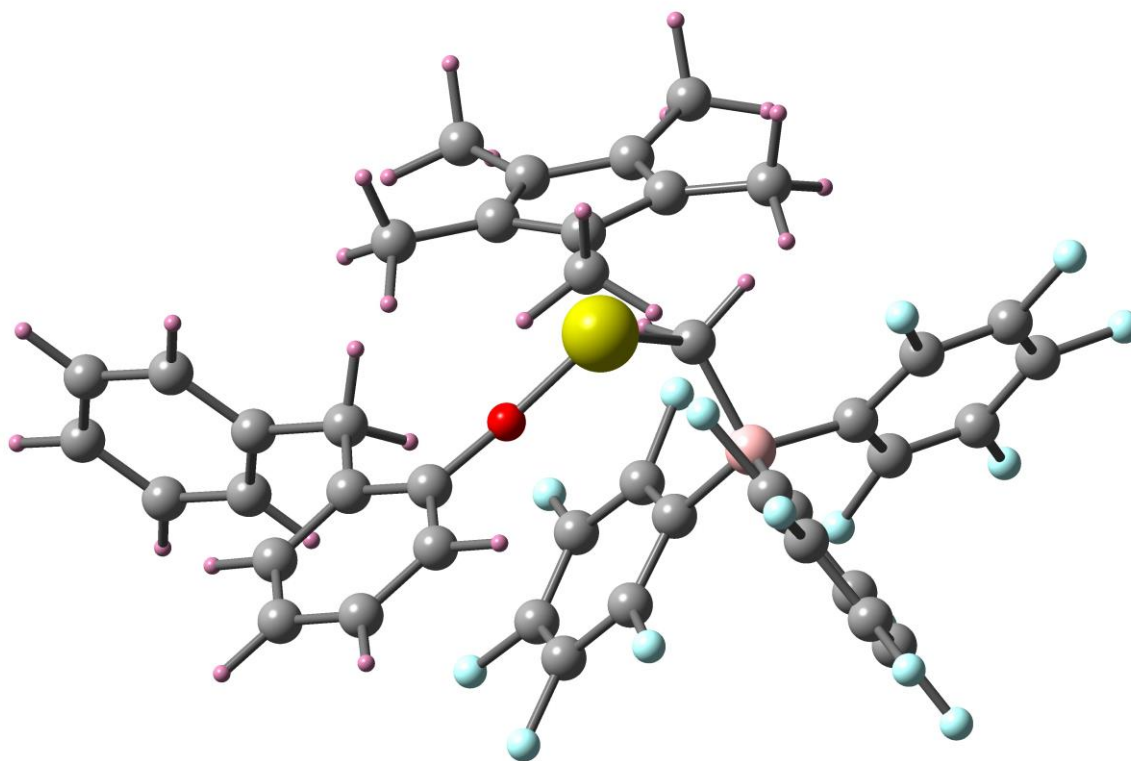

| <b>vacuum</b> | <b>toluene-like solvent</b> | <b>D3 dispersion</b> |
|---------------|-----------------------------|----------------------|
| -3272.1567675 | -3272.1682754               | -0.62083133          |

|    |             |             |             |
|----|-------------|-------------|-------------|
| Ti | -0.38678300 | 1.95558800  | -0.72613800 |
| O  | -1.72135900 | 1.28257100  | 0.26021900  |
| C  | -2.77439100 | 1.20825700  | 1.17283000  |
| C  | -2.62166300 | 1.87364300  | 2.41336900  |
| C  | -3.94942600 | 0.46001600  | 0.86539300  |
| C  | -3.64398400 | 1.80862900  | 3.37803100  |
| C  | -4.95921700 | 0.41832700  | 1.85602800  |
| C  | -4.81847500 | 1.07952400  | 3.09498300  |
| H  | -3.51794200 | 2.31221500  | 4.33845900  |
| H  | -5.86879000 | -0.14633800 | 1.65601700  |
| H  | -5.61751800 | 1.01617500  | 3.83598700  |
| C  | 0.09784200  | 2.90468100  | -2.93290100 |
| C  | -1.33734900 | 2.84635900  | -2.70158100 |
| C  | 0.65878000  | 3.80846200  | -1.96705700 |
| C  | -1.66500100 | 3.77007400  | -1.63197300 |
| C  | -0.42763500 | 4.33384200  | -1.15291300 |
| F  | 3.93514900  | 2.20106400  | 4.59068600  |
| C  | 3.34212300  | 1.56586100  | 3.51239000  |
| C  | 3.55447600  | 0.19371500  | 3.27582600  |
| C  | 2.51012700  | 2.27550100  | 2.63403900  |
| C  | 2.94444600  | -0.42987000 | 2.17195700  |
| F  | 4.35768800  | -0.52953600 | 4.14435400  |
| C  | 1.94141100  | 1.57365300  | 1.55817800  |
| F  | 2.25984800  | 3.63037300  | 2.82838900  |

|   |             |             |             |
|---|-------------|-------------|-------------|
| C | 2.10202700  | 0.22724400  | 1.23543200  |
| F | 3.17808800  | -1.79739400 | 2.04306700  |
| F | 1.08212200  | 2.42531800  | 0.74286700  |
| B | 1.47660000  | -0.58511400 | -0.10178100 |
| C | 2.85576900  | -1.23943900 | -0.81675700 |
| C | 0.33963800  | -1.71284300 | 0.34649100  |
| C | 0.75153200  | 0.37999100  | -1.30256600 |
| C | 3.20798800  | -2.60830400 | -0.90658400 |
| C | 3.83023700  | -0.38721200 | -1.39049000 |
| C | -0.26368000 | -1.83180600 | 1.61833400  |
| C | -0.19063100 | -2.62608400 | -0.59947700 |
| H | 1.50116200  | 0.70066800  | -2.03190900 |
| H | 0.01948700  | -0.25000800 | -1.84424300 |
| C | 4.36303500  | -3.09133100 | -1.55640300 |
| F | 2.42495600  | -3.59386000 | -0.30159000 |
| C | 5.00096900  | -0.81399300 | -2.04283300 |
| F | 3.67725900  | 1.01398700  | -1.30188700 |
| C | -1.25160400 | -2.78169100 | 1.95198500  |
| F | 0.07620300  | -0.95555900 | 2.66280300  |
| C | -1.17198500 | -3.59307400 | -0.32216500 |
| F | 0.27728100  | -2.60831900 | -1.92323500 |
| C | 5.26704900  | -2.18934400 | -2.14023100 |
| F | 4.62453200  | -4.45537100 | -1.61214000 |
| F | 5.89245800  | 0.10854000  | -2.58489900 |
| C | -1.70773100 | -3.67748600 | 0.97412300  |
| F | -1.79406300 | -2.82178200 | 3.23182800  |
| F | -1.62700000 | -4.45568700 | -1.31440200 |
| F | 6.40780900  | -2.64469500 | -2.78572000 |
| F | -2.69844000 | -4.60668900 | 1.26924200  |
| C | -3.05231800 | 4.15287900  | -1.17073100 |
| H | -3.08530500 | 4.41574800  | -0.10489400 |
| H | -3.39918300 | 5.03597000  | -1.73505500 |
| H | -3.78630900 | 3.35390800  | -1.33466600 |
| C | -2.31809300 | 2.10630500  | -3.58428500 |
| H | -1.98282800 | 1.08760700  | -3.82865900 |
| H | -3.31533100 | 2.03288100  | -3.13355400 |
| H | -2.43370600 | 2.64219700  | -4.54244800 |
| C | 0.81863500  | 2.27059600  | -4.09788200 |
| H | 0.44343700  | 1.26402900  | -4.32872600 |
| H | 0.67686100  | 2.88762400  | -5.00223300 |
| H | 1.89945000  | 2.19336700  | -3.92538700 |
| C | 2.10870200  | 4.22283200  | -1.86841600 |
| H | 2.79412700  | 3.42241500  | -2.17257800 |
| H | 2.29664100  | 5.08674000  | -2.52985100 |
| H | 2.38570700  | 4.53049900  | -0.85131500 |
| C | -0.28608600 | 5.37619700  | -0.06540400 |
| H | 0.63704100  | 5.25381800  | 0.51721500  |
| H | -0.25427100 | 6.38483400  | -0.51284900 |
| H | -1.13003800 | 5.36218800  | 0.63785800  |
| H | -1.69770000 | 2.41507600  | 2.62079300  |
| C | -4.07317400 | -0.27209600 | -0.47924800 |
| H | -3.88386700 | 0.45343600  | -1.28489100 |
| H | -3.25284800 | -1.00352800 | -0.54467500 |
| C | -5.39904000 | -0.97984100 | -0.75334000 |
| C | -6.48464000 | -0.28482900 | -1.34476300 |
| C | -5.57273200 | -2.35200800 | -0.44231300 |
| C | -7.70663700 | -0.93683900 | -1.61730300 |

|                |             |             |             |
|----------------|-------------|-------------|-------------|
| H              | -6.37602800 | 0.77429400  | -1.59475500 |
| C              | -6.79256900 | -3.00992700 | -0.71267500 |
| H              | -4.75515800 | -2.91470000 | 0.01219900  |
| C              | -7.86490100 | -2.30477800 | -1.30182600 |
| H              | -8.52808200 | -0.38217000 | -2.07729100 |
| H              | -6.90041800 | -4.06919000 | -0.46833600 |
| H              | -8.80744000 | -2.81394500 | -1.51588700 |
|                |             |             |             |
| Frequencies -- | 7.3524      | 16.1502     | 18.8992     |
| Frequencies -- | 21.3904     | 24.8681     | 27.5335     |
| Frequencies -- | 30.2301     | 32.4191     | 35.0965     |
| Frequencies -- | 38.2851     | 39.9751     | 42.0113     |
| Frequencies -- | 47.0189     | 55.0010     | 61.3214     |
| Frequencies -- | 79.0111     | 80.5043     | 92.6994     |
| Frequencies -- | 93.2040     | 97.3219     | 108.5743    |
| Frequencies -- | 109.8427    | 111.1820    | 113.9712    |
| Frequencies -- | 119.4068    | 122.3838    | 124.5747    |
| Frequencies -- | 130.1022    | 134.0534    | 137.6745    |
| Frequencies -- | 140.5141    | 143.6600    | 148.4670    |
| Frequencies -- | 158.1282    | 159.1095    | 160.9272    |
| Frequencies -- | 162.5733    | 164.3779    | 169.2087    |
| Frequencies -- | 169.9373    | 183.6595    | 200.7842    |
| Frequencies -- | 209.7109    | 214.3562    | 220.9814    |
| Frequencies -- | 224.2645    | 226.6717    | 242.8182    |
| Frequencies -- | 247.0763    | 263.6775    | 264.7828    |
| Frequencies -- | 265.1652    | 275.0201    | 277.1343    |
| Frequencies -- | 278.9487    | 284.3330    | 290.2968    |
| Frequencies -- | 300.0961    | 301.9023    | 305.5598    |
| Frequencies -- | 306.3514    | 310.7089    | 314.3651    |
| Frequencies -- | 317.6835    | 322.4650    | 330.8636    |
| Frequencies -- | 333.8949    | 340.5131    | 354.0689    |
| Frequencies -- | 363.1647    | 370.4844    | 375.5340    |
| Frequencies -- | 377.0651    | 379.6134    | 389.5086    |
| Frequencies -- | 395.5025    | 404.7633    | 406.1818    |
| Frequencies -- | 413.2591    | 430.8818    | 432.2602    |
| Frequencies -- | 441.0955    | 443.6990    | 452.2494    |
| Frequencies -- | 458.6100    | 462.4268    | 467.0925    |
| Frequencies -- | 478.1046    | 500.5923    | 534.0648    |
| Frequencies -- | 536.2119    | 537.3995    | 541.1295    |
| Frequencies -- | 543.6756    | 547.6063    | 556.1320    |
| Frequencies -- | 563.1750    | 572.1916    | 580.3765    |
| Frequencies -- | 588.0391    | 599.4982    | 603.2968    |
| Frequencies -- | 610.3805    | 619.7181    | 623.8776    |
| Frequencies -- | 624.1497    | 633.8593    | 635.5624    |
| Frequencies -- | 640.8022    | 653.3780    | 663.0794    |
| Frequencies -- | 672.8392    | 703.7181    | 704.9563    |
| Frequencies -- | 710.6361    | 717.0159    | 729.3391    |
| Frequencies -- | 734.8701    | 744.1636    | 745.7448    |
| Frequencies -- | 747.2545    | 764.5592    | 765.7852    |
| Frequencies -- | 800.8335    | 804.2860    | 806.3881    |
| Frequencies -- | 821.5562    | 831.1985    | 840.1618    |
| Frequencies -- | 860.3024    | 861.6769    | 863.5100    |
| Frequencies -- | 873.6571    | 905.9196    | 911.5160    |
| Frequencies -- | 926.7452    | 929.8059    | 935.8485    |
| Frequencies -- | 962.9401    | 967.9001    | 969.9529    |
| Frequencies -- | 972.4735    | 986.9596    | 997.1657    |
| Frequencies -- | 1004.1187   | 1006.5852   | 1021.8782   |
| Frequencies -- | 1022.3474   | 1028.2302   | 1039.5144   |
| Frequencies -- | 1043.1699   | 1044.7211   | 1045.5351   |
| Frequencies -- | 1048.2114   | 1049.3685   | 1050.8507   |
| Frequencies -- | 1052.4807   | 1053.4182   | 1055.9564   |
| Frequencies -- | 1082.4012   | 1086.6670   | 1090.1174   |

|                |           |           |           |
|----------------|-----------|-----------|-----------|
| Frequencies -- | 1093.7372 | 1105.6181 | 1125.4791 |
| Frequencies -- | 1173.0843 | 1174.7711 | 1179.8629 |
| Frequencies -- | 1182.6203 | 1191.2586 | 1199.1886 |
| Frequencies -- | 1202.4935 | 1203.8963 | 1209.3608 |
| Frequencies -- | 1213.0877 | 1219.1520 | 1239.5158 |
| Frequencies -- | 1286.4066 | 1295.6182 | 1314.4449 |
| Frequencies -- | 1316.8765 | 1320.6587 | 1338.3842 |
| Frequencies -- | 1344.8625 | 1349.7031 | 1349.8246 |
| Frequencies -- | 1374.6413 | 1379.5450 | 1383.7603 |
| Frequencies -- | 1409.3869 | 1412.1840 | 1414.9290 |
| Frequencies -- | 1416.3948 | 1421.2612 | 1424.3728 |
| Frequencies -- | 1426.3382 | 1428.9304 | 1430.8142 |
| Frequencies -- | 1435.4622 | 1444.9797 | 1447.6744 |
| Frequencies -- | 1453.0480 | 1454.7535 | 1464.1965 |
| Frequencies -- | 1466.4729 | 1467.6263 | 1471.4527 |
| Frequencies -- | 1478.6158 | 1481.3309 | 1490.0257 |
| Frequencies -- | 1491.8393 | 1495.2429 | 1497.4464 |
| Frequencies -- | 1500.0263 | 1501.6723 | 1504.1357 |
| Frequencies -- | 1505.5330 | 1510.0981 | 1517.2623 |
| Frequencies -- | 1523.0202 | 1588.7633 | 1591.0002 |
| Frequencies -- | 1593.6337 | 1597.3216 | 1604.6501 |
| Frequencies -- | 1614.9680 | 1616.8821 | 1619.8632 |
| Frequencies -- | 1627.2543 | 1630.4816 | 3005.1164 |
| Frequencies -- | 3009.8767 | 3010.3131 | 3011.8960 |
| Frequencies -- | 3012.1877 | 3013.4042 | 3041.9940 |
| Frequencies -- | 3090.8619 | 3095.0228 | 3100.4224 |
| Frequencies -- | 3101.3836 | 3105.0565 | 3107.5367 |
| Frequencies -- | 3137.2595 | 3142.2229 | 3144.3321 |
| Frequencies -- | 3144.9830 | 3149.5082 | 3152.4711 |
| Frequencies -- | 3154.1263 | 3158.3706 | 3167.4943 |
| Frequencies -- | 3170.2169 | 3181.7160 | 3182.4396 |
| Frequencies -- | 3195.3763 | 3196.5885 | 3208.4580 |

**Catalyst 16:**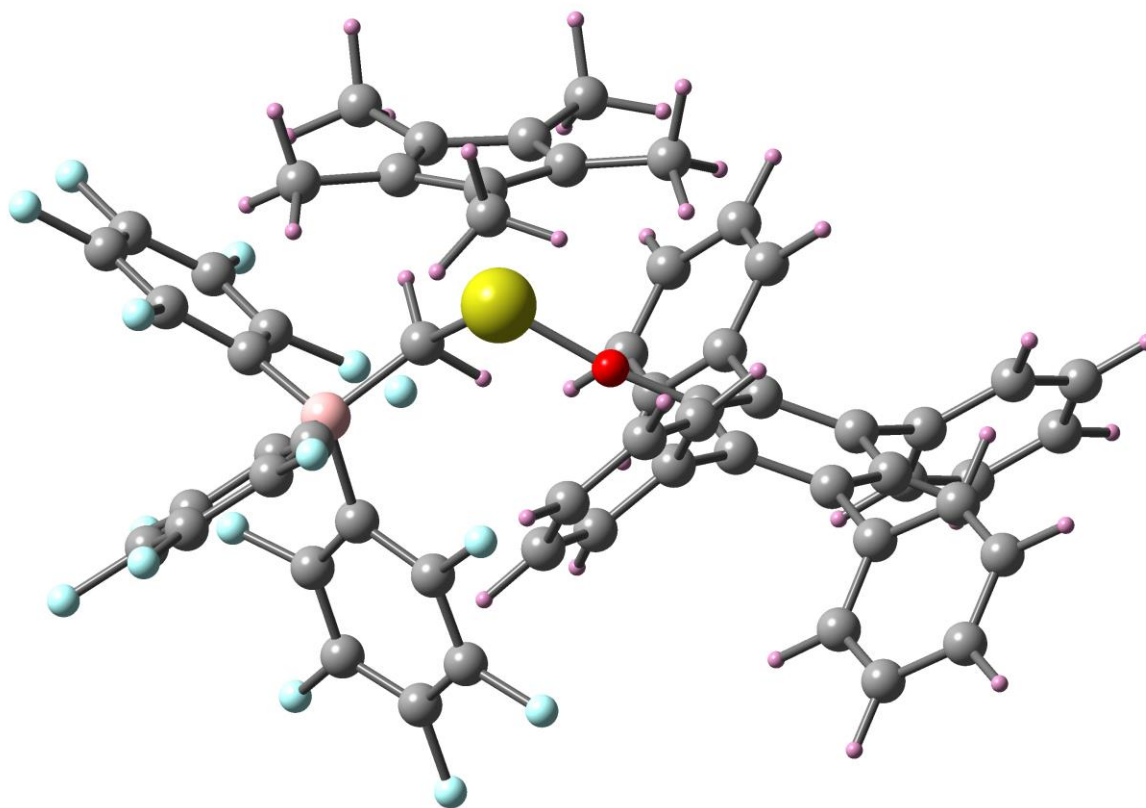

| <b>vacuum</b> | <b>toluene-like solvent</b> | <b>D3 dispersion</b> |
|---------------|-----------------------------|----------------------|
| -3925.6893772 | -3925.7033055               | -0.85842697          |

|    |             |             |             |
|----|-------------|-------------|-------------|
| Ti | 0.02815800  | -0.53412400 | -1.62220000 |
| O  | -1.53523600 | -0.09800500 | -0.83859400 |
| C  | -2.82970900 | 0.17740100  | -0.40265800 |
| C  | -3.26958200 | 1.54166900  | -0.35186000 |
| C  | -3.68446200 | -0.91851400 | -0.05113100 |
| C  | -4.62562900 | 1.79717700  | 0.01832100  |
| C  | -5.03278900 | -0.63068600 | 0.31933800  |
| C  | -5.47494000 | 0.71044000  | 0.31988400  |
| H  | -6.49498400 | 0.92099600  | 0.63792900  |
| C  | -0.00469000 | 0.32475400  | -3.84589400 |
| C  | 1.35758400  | -0.15748700 | -3.70224800 |
| C  | -0.89776400 | -0.81694800 | -3.79890100 |
| C  | 1.30242500  | -1.57912000 | -3.51703200 |
| C  | -0.08984500 | -1.98926400 | -3.56470700 |
| F  | 0.95059900  | 1.88886200  | 5.90355500  |
| C  | 1.36690500  | 1.49859800  | 4.63861500  |
| C  | 2.64474800  | 1.83814100  | 4.16498600  |
| C  | 0.52321200  | 0.74370600  | 3.80818200  |
| C  | 3.05057000  | 1.43342600  | 2.87507200  |
| F  | 3.50427300  | 2.56572800  | 4.97962700  |
| C  | 0.97870400  | 0.37031000  | 2.53100800  |
| F  | -0.74223400 | 0.36655300  | 4.25300300  |
| C  | 2.23444500  | 0.70392200  | 1.97487200  |

|   |             |             |             |
|---|-------------|-------------|-------------|
| F | 4.35650400  | 1.79434700  | 2.53950400  |
| F | 0.08369400  | -0.42596500 | 1.78852800  |
| B | 2.63666200  | 0.15900600  | 0.43236000  |
| C | 4.01595700  | 0.86445300  | -0.17941000 |
| C | 2.83778600  | -1.48743100 | 0.70755700  |
| C | 1.43929400  | 0.62293900  | -0.68965200 |
| C | 5.08123300  | 0.20110900  | -0.82457200 |
| C | 4.14339500  | 2.27571400  | -0.22175600 |
| C | 2.02575700  | -2.52050800 | 0.23791000  |
| C | 3.87125700  | -1.97646900 | 1.55085000  |
| H | 0.70769500  | 1.25973800  | -0.16282400 |
| H | 1.92579900  | 1.25689700  | -1.43947700 |
| C | 6.19917400  | 0.84270300  | -1.39757900 |
| F | 5.06908200  | -1.19971500 | -0.97339800 |
| C | 5.23464500  | 2.96787500  | -0.77419900 |
| F | 3.12229000  | 3.07993600  | 0.30669700  |
| C | 2.18667900  | -3.89817100 | 0.47205000  |
| F | 0.87139600  | -2.23372200 | -0.59067100 |
| C | 4.08917700  | -3.33303300 | 1.84989500  |
| F | 4.76750400  | -1.07705700 | 2.12552300  |
| C | 6.28567300  | 2.24267500  | -1.36336900 |
| F | 7.20547700  | 0.10107200  | -2.01007600 |
| F | 5.28366500  | 4.35804900  | -0.75096200 |
| C | 3.24177100  | -4.31242900 | 1.29804900  |
| F | 1.33701000  | -4.83705800 | -0.10402200 |
| F | 5.13633400  | -3.72114800 | 2.67260700  |
| F | 7.37441800  | 2.90029500  | -1.91967900 |
| F | 3.44237600  | -5.65795800 | 1.56319200  |
| C | 2.48626300  | -2.51371400 | -3.43544700 |
| H | 2.23751700  | -3.45730800 | -2.93323200 |
| H | 2.82207300  | -2.77332800 | -4.45504400 |
| H | 3.34449600  | -2.06767600 | -2.91837100 |
| C | 2.59865300  | 0.66449200  | -3.94585100 |
| H | 3.48427800  | 0.23498500  | -3.46505200 |
| H | 2.80334500  | 0.70725300  | -5.03022400 |
| H | 2.49155200  | 1.70206100  | -3.60181900 |
| C | -0.37429000 | 1.73932200  | -4.22659400 |
| H | 0.14085600  | 2.49232100  | -3.61519500 |
| H | -0.08876900 | 1.92201100  | -5.27750900 |
| H | -1.44952800 | 1.92627300  | -4.14042000 |
| C | -2.38352400 | -0.79767700 | -4.07259600 |
| H | -2.84337700 | 0.16189500  | -3.80436100 |
| H | -2.56433000 | -0.96037600 | -5.14962300 |
| H | -2.91689500 | -1.58554900 | -3.52728500 |
| C | -0.57359500 | -3.42020500 | -3.51459700 |
| H | -1.64920600 | -3.48885100 | -3.32072900 |
| H | -0.37985100 | -3.91150800 | -4.48433600 |
| H | -0.06125200 | -4.01371800 | -2.74505600 |
| C | -5.20847800 | 3.17957400  | 0.16049100  |
| C | -6.33767100 | 3.55796800  | -0.61173700 |
| C | -4.71263800 | 4.10106500  | 1.11881400  |
| C | -6.94253900 | 4.82218000  | -0.44622900 |
| H | -6.73967300 | 2.86254300  | -1.35220400 |
| C | -5.31965800 | 5.36213700  | 1.29225000  |
| H | -3.85920900 | 3.82774600  | 1.74027400  |
| C | -6.43507500 | 5.73099700  | 0.50798700  |
| H | -7.80609100 | 5.09423600  | -1.05804300 |

|                |             |             |             |
|----------------|-------------|-------------|-------------|
| H              | -4.92403900 | 6.05233900  | 2.04110100  |
| H              | -6.90351100 | 6.70885200  | 0.64167400  |
| C              | -6.02098700 | -1.67756600 | 0.76463700  |
| C              | -7.24136800 | -1.85156300 | 0.06116900  |
| C              | -5.80598600 | -2.44957500 | 1.93560300  |
| C              | -8.20956000 | -2.77922900 | 0.50153800  |
| H              | -7.43014100 | -1.26431400 | -0.84047900 |
| C              | -6.77473300 | -3.37175200 | 2.38263300  |
| H              | -4.88665000 | -2.31918500 | 2.50736300  |
| C              | -7.97952400 | -3.54452200 | 1.66581600  |
| H              | -9.13833900 | -2.90157300 | -0.06099000 |
| H              | -6.58996000 | -3.95009900 | 3.29096200  |
| H              | -8.72881300 | -4.26034800 | 2.01177300  |
| C              | -2.36592800 | 2.69571000  | -0.69529000 |
| C              | -2.64989700 | 3.51995500  | -1.81504400 |
| C              | -1.27663200 | 3.05404100  | 0.13859900  |
| C              | -1.87201200 | 4.66225000  | -2.09437900 |
| H              | -3.49691700 | 3.27771200  | -2.45942100 |
| C              | -0.49306800 | 4.19497700  | -0.13776700 |
| H              | -1.06165800 | 2.45515800  | 1.02413200  |
| C              | -0.78815600 | 5.00485400  | -1.25620700 |
| H              | -2.11721900 | 5.28705700  | -2.95665200 |
| H              | 0.34160900  | 4.45040700  | 0.51806700  |
| H              | -0.18652800 | 5.89232100  | -1.46485300 |
| C              | -3.20899100 | -2.34656200 | -0.06656200 |
| C              | -3.77866900 | -3.28505800 | -0.96579500 |
| C              | -2.27243300 | -2.81588800 | 0.88967600  |
| C              | -3.43189900 | -4.65076900 | -0.90856500 |
| H              | -4.51935600 | -2.94934300 | -1.69400500 |
| C              | -1.92992800 | -4.18288000 | 0.95375100  |
| H              | -1.83591800 | -2.11721800 | 1.60293100  |
| C              | -2.50714800 | -5.10682000 | 0.05598800  |
| H              | -3.89349900 | -5.35654700 | -1.60340800 |
| H              | -1.22112400 | -4.52695000 | 1.70989800  |
| H              | -2.24383800 | -6.16530200 | 0.11149100  |
| Frequencies -- | 9.1397      | 10.8600     | 12.4526     |
| Frequencies -- | 14.5052     | 22.5803     | 24.3599     |
| Frequencies -- | 27.7256     | 30.9721     | 33.1073     |
| Frequencies -- | 35.0528     | 35.1253     | 40.8610     |
| Frequencies -- | 41.6378     | 45.5779     | 46.4881     |
| Frequencies -- | 49.2014     | 52.1502     | 55.1263     |
| Frequencies -- | 60.2748     | 62.5339     | 67.4179     |
| Frequencies -- | 74.2099     | 78.5076     | 82.0508     |
| Frequencies -- | 88.7880     | 100.5651    | 103.7096    |
| Frequencies -- | 105.9757    | 108.4950    | 116.9690    |
| Frequencies -- | 117.2164    | 118.5292    | 123.1808    |
| Frequencies -- | 126.3468    | 130.2433    | 135.6318    |
| Frequencies -- | 139.2122    | 141.2510    | 142.9805    |
| Frequencies -- | 144.9576    | 147.5208    | 148.1891    |
| Frequencies -- | 157.8745    | 159.7905    | 162.9378    |
| Frequencies -- | 165.8802    | 166.2015    | 175.1166    |
| Frequencies -- | 178.0280    | 192.6878    | 197.3681    |
| Frequencies -- | 205.6711    | 211.0019    | 213.2066    |
| Frequencies -- | 214.0123    | 217.4704    | 224.2932    |
| Frequencies -- | 229.1258    | 246.5243    | 251.8878    |
| Frequencies -- | 257.1336    | 261.7482    | 263.7460    |
| Frequencies -- | 264.1076    | 265.0147    | 273.5221    |
| Frequencies -- | 274.4272    | 279.0425    | 280.8496    |



|                |           |           |           |
|----------------|-----------|-----------|-----------|
| Frequencies -- | 290.5035  | 292.2766  | 299.5684  |
| Frequencies -- | 300.4950  | 302.1368  | 303.1501  |
| Frequencies -- | 304.3896  | 321.7096  | 324.6507  |
| Frequencies -- | 325.9310  | 329.3108  | 333.6399  |
| Frequencies -- | 344.7526  | 354.7026  | 360.4205  |
| Frequencies -- | 374.9921  | 376.8848  | 379.4022  |
| Frequencies -- | 381.3726  | 388.8007  | 394.3280  |
| Frequencies -- | 397.5068  | 403.7166  | 405.1433  |
| Frequencies -- | 407.1510  | 409.3829  | 411.6248  |
| Frequencies -- | 412.9164  | 431.0777  | 433.4395  |
| Frequencies -- | 440.3268  | 442.1981  | 454.1622  |
| Frequencies -- | 458.8729  | 466.8548  | 484.6369  |
| Frequencies -- | 516.6368  | 518.0190  | 529.2300  |
| Frequencies -- | 531.2095  | 536.2813  | 541.1232  |
| Frequencies -- | 542.9440  | 544.7496  | 546.2184  |
| Frequencies -- | 551.3854  | 555.8085  | 557.7839  |
| Frequencies -- | 584.4914  | 585.7952  | 595.9441  |
| Frequencies -- | 606.4470  | 609.3032  | 614.7528  |
| Frequencies -- | 615.8989  | 617.8055  | 620.2346  |
| Frequencies -- | 624.3186  | 626.1703  | 631.7431  |
| Frequencies -- | 635.2274  | 636.2590  | 641.3305  |
| Frequencies -- | 641.6187  | 651.2516  | 656.0267  |
| Frequencies -- | 678.0139  | 688.7095  | 693.0509  |
| Frequencies -- | 705.6279  | 709.4153  | 711.1669  |
| Frequencies -- | 713.2285  | 715.9449  | 716.9399  |
| Frequencies -- | 725.0253  | 734.0863  | 735.8888  |
| Frequencies -- | 741.8729  | 746.5685  | 747.1218  |
| Frequencies -- | 764.4634  | 764.6743  | 771.4901  |
| Frequencies -- | 783.4415  | 796.3764  | 803.3270  |
| Frequencies -- | 804.0573  | 806.2309  | 826.7992  |
| Frequencies -- | 837.7081  | 858.3257  | 858.6384  |
| Frequencies -- | 861.4685  | 861.9985  | 866.5286  |
| Frequencies -- | 871.7965  | 883.2255  | 902.7484  |
| Frequencies -- | 912.6003  | 914.6477  | 933.9923  |
| Frequencies -- | 935.9437  | 940.5581  | 944.5935  |
| Frequencies -- | 959.2118  | 968.2924  | 973.9139  |
| Frequencies -- | 984.8138  | 985.5240  | 988.1831  |
| Frequencies -- | 991.9083  | 995.2004  | 995.5837  |
| Frequencies -- | 1001.5527 | 1005.1647 | 1006.4903 |
| Frequencies -- | 1007.7547 | 1011.2988 | 1014.8074 |
| Frequencies -- | 1019.9848 | 1020.4585 | 1024.2855 |
| Frequencies -- | 1027.7874 | 1038.6450 | 1041.0034 |
| Frequencies -- | 1041.9049 | 1043.8693 | 1047.0385 |
| Frequencies -- | 1047.7853 | 1049.1669 | 1050.8123 |
| Frequencies -- | 1051.1446 | 1051.4826 | 1051.9963 |
| Frequencies -- | 1053.2854 | 1053.9096 | 1070.6059 |
| Frequencies -- | 1089.2534 | 1089.3408 | 1090.6678 |
| Frequencies -- | 1091.0474 | 1091.1587 | 1091.7402 |
| Frequencies -- | 1126.8164 | 1128.5507 | 1128.7976 |
| Frequencies -- | 1175.0422 | 1177.3694 | 1182.7443 |
| Frequencies -- | 1183.0247 | 1184.1751 | 1185.3276 |
| Frequencies -- | 1202.3703 | 1204.0375 | 1205.4649 |
| Frequencies -- | 1207.2474 | 1208.4261 | 1210.4906 |
| Frequencies -- | 1212.7478 | 1228.9789 | 1261.7021 |
| Frequencies -- | 1281.2176 | 1296.6324 | 1303.4772 |
| Frequencies -- | 1318.8850 | 1320.1119 | 1321.1775 |
| Frequencies -- | 1327.9705 | 1332.1263 | 1332.2272 |
| Frequencies -- | 1334.9368 | 1338.9956 | 1346.2615 |
| Frequencies -- | 1350.7999 | 1366.8777 | 1368.5489 |
| Frequencies -- | 1369.9901 | 1370.7427 | 1378.7098 |
| Frequencies -- | 1394.3697 | 1409.2065 | 1411.5487 |
| Frequencies -- | 1416.4487 | 1416.7217 | 1420.6492 |
| Frequencies -- | 1425.8507 | 1427.0755 | 1429.5807 |

|                |           |           |           |
|----------------|-----------|-----------|-----------|
| Frequencies -- | 1433.1501 | 1436.0640 | 1440.5065 |
| Frequencies -- | 1443.2173 | 1446.0102 | 1447.5447 |
| Frequencies -- | 1451.1339 | 1455.3319 | 1455.7192 |
| Frequencies -- | 1466.6106 | 1466.9292 | 1467.4602 |
| Frequencies -- | 1470.5226 | 1480.9261 | 1492.4177 |
| Frequencies -- | 1494.4555 | 1496.8699 | 1497.2939 |
| Frequencies -- | 1498.7240 | 1501.4545 | 1502.3198 |
| Frequencies -- | 1503.7052 | 1507.7112 | 1508.4956 |
| Frequencies -- | 1512.1832 | 1519.7105 | 1525.1678 |
| Frequencies -- | 1526.7906 | 1588.6229 | 1591.8281 |
| Frequencies -- | 1593.8436 | 1594.7240 | 1595.7218 |
| Frequencies -- | 1596.0113 | 1597.2037 | 1599.2497 |
| Frequencies -- | 1617.0273 | 1619.2601 | 1623.0038 |
| Frequencies -- | 1623.6505 | 1623.9954 | 1624.3775 |
| Frequencies -- | 1626.8356 | 3010.9479 | 3011.3391 |
| Frequencies -- | 3011.8050 | 3012.1613 | 3013.2756 |
| Frequencies -- | 3029.4715 | 3102.8353 | 3105.8061 |
| Frequencies -- | 3107.0687 | 3108.9194 | 3110.1437 |
| Frequencies -- | 3135.1206 | 3151.2357 | 3151.7884 |
| Frequencies -- | 3151.8702 | 3154.5964 | 3154.8572 |
| Frequencies -- | 3156.3306 | 3159.4782 | 3159.9304 |
| Frequencies -- | 3161.9159 | 3165.4338 | 3166.2528 |
| Frequencies -- | 3166.5963 | 3168.3219 | 3171.9151 |
| Frequencies -- | 3172.2732 | 3178.1223 | 3179.3610 |
| Frequencies -- | 3185.3240 | 3185.3953 | 3186.8110 |
| Frequencies -- | 3190.4507 | 3194.2843 | 3197.4554 |
| Frequencies -- | 3197.8623 | 3201.3233 | 3208.8431 |

**Catalyst 17:****distal conformation**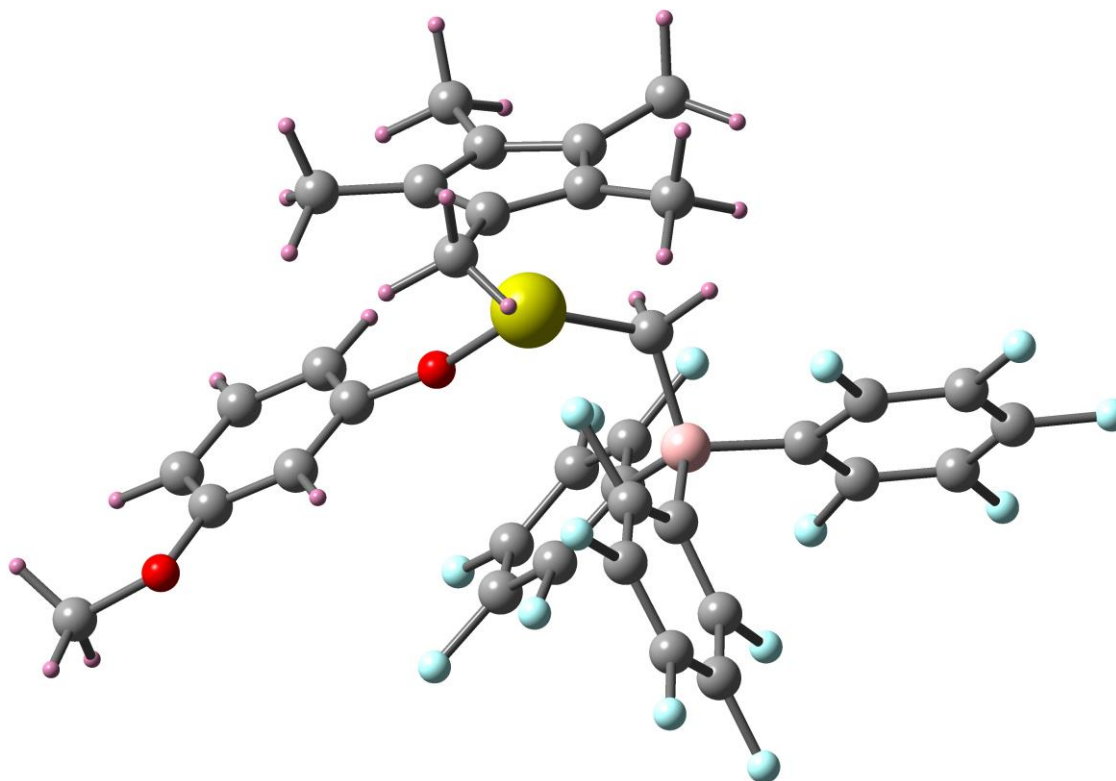

| <b>vacuum</b> | <b>toluene-like solvent</b> | <b>D3 dispersion</b> |
|---------------|-----------------------------|----------------------|
| -3116.3973202 | -3116.408897                | -0.54441155          |

|    |             |             |             |
|----|-------------|-------------|-------------|
| Ti | -1.05501500 | 1.78849400  | -0.72554600 |
| O  | -2.28925100 | 0.51312100  | -0.54418300 |
| C  | -3.44599500 | -0.24845100 | -0.44851300 |
| C  | -4.14823900 | -0.27873600 | 0.77165700  |
| C  | -3.87967300 | -1.00566600 | -1.56593600 |
| C  | -5.30765800 | -1.08317400 | 0.88551600  |
| C  | -5.03404300 | -1.79857300 | -1.43362100 |
| C  | -5.75718200 | -1.84743200 | -0.22125900 |
| H  | -5.37314500 | -2.39729300 | -2.28156100 |
| H  | -6.64058000 | -2.47871900 | -0.15144200 |
| C  | -0.42587000 | 3.39415600  | -2.44435400 |
| C  | -1.80581900 | 2.96413000  | -2.62426400 |
| C  | -0.34781900 | 4.09814200  | -1.19235200 |
| C  | -2.58428600 | 3.45888500  | -1.50678800 |
| C  | -1.67735500 | 4.12594800  | -0.60428400 |
| F  | 1.33572900  | 1.18232400  | 5.66132800  |
| C  | 1.28312100  | 0.82894200  | 4.32322700  |
| C  | 1.94619200  | -0.32163600 | 3.85372600  |
| C  | 0.56203100  | 1.60789100  | 3.40604200  |
| C  | 1.88329000  | -0.65951900 | 2.48950900  |

|   |             |             |             |
|---|-------------|-------------|-------------|
| F | 2.64663600  | -1.11564000 | 4.74932900  |
| C | 0.55207400  | 1.19651900  | 2.06289400  |
| F | -0.11763400 | 2.74843600  | 3.82018600  |
| C | 1.18570600  | 0.08770500  | 1.50329100  |
| F | 2.53168700  | -1.83801500 | 2.12550300  |
| F | -0.25421700 | 2.07986100  | 1.22500700  |
| B | 1.23180300  | -0.34857800 | -0.12351900 |
| C | 2.88409300  | -0.46419200 | -0.43458600 |
| C | 0.37744900  | -1.74724900 | -0.41033100 |
| C | 0.64989200  | 0.81203100  | -1.22044900 |
| C | 3.61707900  | -1.63672300 | -0.74058300 |
| C | 3.70193600  | 0.69068200  | -0.37508200 |
| C | -0.49840200 | -2.38970100 | 0.49292600  |
| C | 0.40064500  | -2.37027200 | -1.68365100 |
| H | 1.42857400  | 1.54656600  | -1.45318600 |
| H | 0.40688100  | 0.28966200  | -2.16369100 |
| C | 4.99814300  | -1.65897300 | -1.02704800 |
| F | 3.00362900  | -2.89123200 | -0.73421900 |
| C | 5.08223900  | 0.72332000  | -0.64405200 |
| F | 3.14425000  | 1.92932800  | 0.01181100  |
| C | -1.24490800 | -3.54942100 | 0.20079500  |
| F | -0.71437500 | -1.87078200 | 1.78141500  |
| C | -0.32274200 | -3.52487300 | -2.02939600 |
| F | 1.20091300  | -1.83702100 | -2.70806300 |
| C | 5.74074500  | -0.46800000 | -0.98906100 |
| F | 5.63800500  | -2.85512700 | -1.33130800 |
| F | 5.79607600  | 1.91677100  | -0.56702500 |
| C | -1.15459000 | -4.12965700 | -1.07228000 |
| F | -2.09121400 | -4.10600600 | 1.15477400  |
| F | -0.22879400 | -4.07097600 | -3.30642300 |
| F | 7.09999800  | -0.46914100 | -1.26903400 |
| F | -1.89102900 | -5.26355300 | -1.38976800 |
| C | -4.08474500 | 3.36479700  | -1.35542100 |
| H | -4.40008900 | 3.30957600  | -0.30446600 |
| H | -4.55880900 | 4.26183800  | -1.79069200 |
| H | -4.50379100 | 2.49203300  | -1.87171000 |
| C | -2.35349100 | 2.29410800  | -3.86525500 |
| H | -3.26109900 | 1.70889900  | -3.66635800 |
| H | -2.61889400 | 3.05823800  | -4.61681500 |
| H | -1.61625500 | 1.62729500  | -4.33408500 |
| C | 0.66973400  | 3.27925200  | -3.47671200 |
| H | 0.64717800  | 2.32082200  | -4.01314200 |
| H | 0.55687900  | 4.07907900  | -4.22910100 |
| H | 1.66821100  | 3.38855600  | -3.03492100 |
| C | 0.88044000  | 4.76560300  | -0.61801600 |
| H | 1.80571000  | 4.23398900  | -0.87318400 |
| H | 0.97041200  | 5.79174600  | -1.01557000 |
| H | 0.83614100  | 4.84697300  | 0.47618600  |
| C | -2.05666100 | 4.82597700  | 0.68200100  |
| H | -1.27346000 | 4.75088100  | 1.44841400  |
| H | -2.22103900 | 5.90062100  | 0.49102300  |
| H | -2.98510200 | 4.42897100  | 1.11490000  |
| H | -3.80186600 | 0.28347200  | 1.63699100  |
| H | -3.31035600 | -0.98579400 | -2.49429500 |
| O | -5.92446900 | -1.03828800 | 2.13941100  |
| C | -7.08284800 | -1.90201100 | 2.39325500  |
| H | -6.82304600 | -2.96614700 | 2.26776200  |

|                |             |             |            |
|----------------|-------------|-------------|------------|
| H              | -7.35244500 | -1.70851200 | 3.43839300 |
| H              | -7.93078700 | -1.64140800 | 1.73744500 |
| Frequencies -- | 8.2161      | 14.3264     | 18.2863    |
| Frequencies -- | 22.0786     | 25.5672     | 27.1981    |
| Frequencies -- | 33.1216     | 33.6404     | 38.4951    |
| Frequencies -- | 40.5865     | 48.2275     | 56.3827    |
| Frequencies -- | 69.5707     | 77.2198     | 79.6292    |
| Frequencies -- | 81.9662     | 95.0135     | 101.5583   |
| Frequencies -- | 105.6778    | 108.8369    | 110.8936   |
| Frequencies -- | 112.9294    | 116.9480    | 120.3988   |
| Frequencies -- | 123.0570    | 126.8115    | 133.6748   |
| Frequencies -- | 138.3348    | 143.7660    | 145.8084   |
| Frequencies -- | 148.9505    | 157.8099    | 159.2279   |
| Frequencies -- | 161.0387    | 162.6665    | 165.8279   |
| Frequencies -- | 169.1143    | 170.7709    | 194.5256   |
| Frequencies -- | 199.6767    | 214.5158    | 219.0774   |
| Frequencies -- | 220.8943    | 224.1336    | 234.3853   |
| Frequencies -- | 246.3630    | 255.9129    | 263.6918   |
| Frequencies -- | 264.4184    | 264.5632    | 274.9026   |
| Frequencies -- | 277.5100    | 278.1691    | 285.0632   |
| Frequencies -- | 291.9876    | 297.8578    | 302.1157   |
| Frequencies -- | 305.5225    | 305.8685    | 308.6042   |
| Frequencies -- | 313.0723    | 321.8644    | 326.5957   |
| Frequencies -- | 331.9201    | 339.2720    | 357.8785   |
| Frequencies -- | 363.6350    | 371.8991    | 376.1594   |
| Frequencies -- | 377.4445    | 380.0396    | 384.5628   |
| Frequencies -- | 391.5540    | 398.9197    | 404.9901   |
| Frequencies -- | 417.0429    | 431.3155    | 432.4105   |
| Frequencies -- | 443.5177    | 449.3200    | 454.0714   |
| Frequencies -- | 458.8330    | 467.2698    | 474.1130   |
| Frequencies -- | 492.6880    | 534.1370    | 537.1223   |
| Frequencies -- | 539.4440    | 541.3820    | 547.2683   |
| Frequencies -- | 556.3619    | 559.2343    | 565.9929   |
| Frequencies -- | 580.3519    | 588.2335    | 600.6585   |
| Frequencies -- | 603.1896    | 606.2257    | 610.6986   |
| Frequencies -- | 624.2735    | 634.3152    | 636.0871   |
| Frequencies -- | 641.2845    | 652.2364    | 658.8767   |
| Frequencies -- | 672.0066    | 677.0636    | 704.4524   |
| Frequencies -- | 716.8389    | 729.7027    | 735.6978   |
| Frequencies -- | 746.0130    | 747.3550    | 761.1266   |
| Frequencies -- | 765.9888    | 782.2631    | 800.4661   |
| Frequencies -- | 804.3285    | 823.4737    | 829.8306   |
| Frequencies -- | 843.4807    | 865.2554    | 867.2158   |
| Frequencies -- | 873.3760    | 906.6253    | 911.4931   |
| Frequencies -- | 949.4367    | 962.9119    | 969.0020   |
| Frequencies -- | 970.8704    | 973.1765    | 987.4613   |
| Frequencies -- | 1005.2827   | 1021.9207   | 1024.3672  |
| Frequencies -- | 1030.4193   | 1041.8046   | 1043.0944  |
| Frequencies -- | 1044.0011   | 1045.8441   | 1047.4334  |
| Frequencies -- | 1048.3598   | 1049.7815   | 1055.3310  |
| Frequencies -- | 1086.7263   | 1087.4343   | 1092.7626  |
| Frequencies -- | 1097.5579   | 1125.1964   | 1126.2829  |
| Frequencies -- | 1163.4539   | 1173.1107   | 1173.8257  |
| Frequencies -- | 1174.1039   | 1200.0675   | 1202.7615  |
| Frequencies -- | 1208.7571   | 1212.7777   | 1273.6541  |
| Frequencies -- | 1295.3948   | 1300.1855   | 1313.6512  |
| Frequencies -- | 1321.6029   | 1338.0572   | 1344.5193  |
| Frequencies -- | 1349.1723   | 1385.4465   | 1386.2446  |
| Frequencies -- | 1409.9929   | 1412.3899   | 1414.0257  |
| Frequencies -- | 1416.9555   | 1421.4426   | 1424.6861  |
| Frequencies -- | 1426.9664   | 1427.3266   | 1429.5609  |

|                |           |           |           |
|----------------|-----------|-----------|-----------|
| Frequencies -- | 1435.0203 | 1445.9766 | 1448.3367 |
| Frequencies -- | 1451.4324 | 1455.5615 | 1462.4415 |
| Frequencies -- | 1466.1873 | 1469.6515 | 1471.5551 |
| Frequencies -- | 1480.1730 | 1483.4486 | 1485.0900 |
| Frequencies -- | 1488.1619 | 1489.8052 | 1491.7691 |
| Frequencies -- | 1496.3313 | 1498.2899 | 1504.9031 |
| Frequencies -- | 1505.1820 | 1509.4928 | 1514.4820 |
| Frequencies -- | 1520.1422 | 1590.4696 | 1590.7055 |
| Frequencies -- | 1593.4021 | 1598.0067 | 1616.3168 |
| Frequencies -- | 1619.1800 | 1621.7487 | 1630.5262 |
| Frequencies -- | 2997.1284 | 3008.7847 | 3009.9846 |
| Frequencies -- | 3010.8062 | 3011.6798 | 3012.9362 |
| Frequencies -- | 3022.9305 | 3097.5540 | 3098.2973 |
| Frequencies -- | 3100.6175 | 3102.4523 | 3103.0080 |
| Frequencies -- | 3105.6609 | 3136.4101 | 3138.5271 |
| Frequencies -- | 3142.3366 | 3144.3701 | 3146.3657 |
| Frequencies -- | 3149.2592 | 3160.9564 | 3174.6660 |
| Frequencies -- | 3209.8814 | 3216.4430 | 3220.9922 |

### proximal conformation

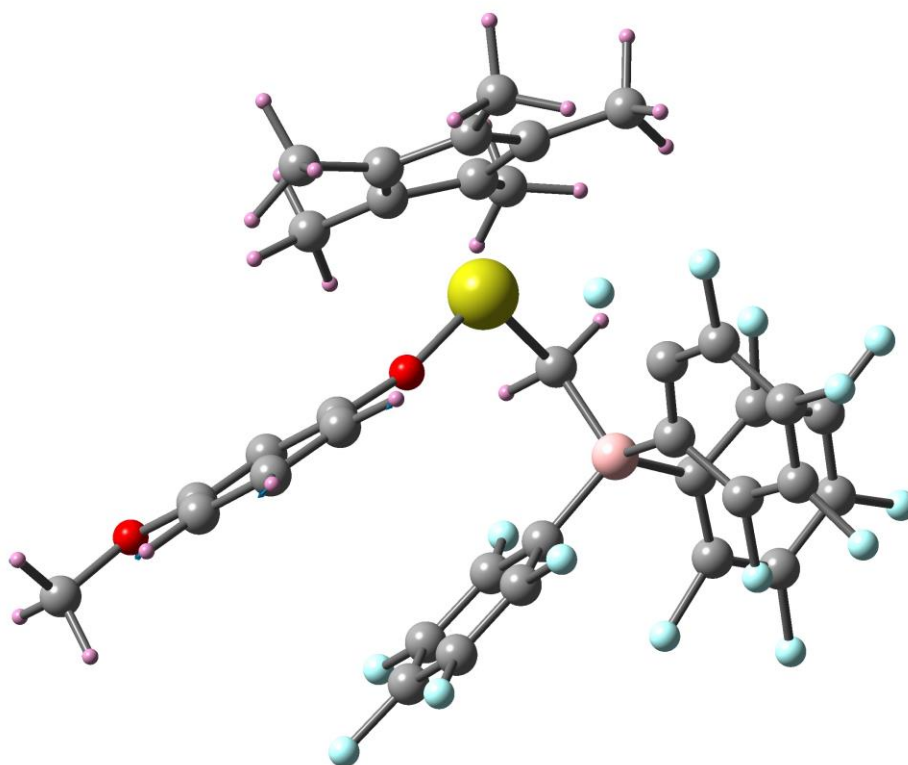

| vacuum        | toluene-like solvent | D3 dispersion |
|---------------|----------------------|---------------|
| -3116.3975257 | -3116.4087855        | -0.54504049   |

|    |             |             |             |
|----|-------------|-------------|-------------|
| Ti | -0.94145400 | 1.90573200  | -0.59544000 |
| O  | -2.24651600 | 0.85735800  | 0.02051600  |
| C  | -3.42798600 | 0.27808900  | 0.46191400  |
| C  | -3.83020100 | 0.45538800  | 1.80978300  |
| C  | -4.18388000 | -0.50794800 | -0.42876900 |

|   |             |             |             |
|---|-------------|-------------|-------------|
| C | -5.00577900 | -0.18008500 | 2.24898600  |
| C | -5.36445100 | -1.13904200 | 0.03195200  |
| C | -5.78201700 | -0.97559500 | 1.37711200  |
| H | -5.32056900 | -0.06462400 | 3.28813400  |
| H | -6.68117200 | -1.45944200 | 1.75295800  |
| C | -0.47954600 | 3.16908100  | -2.62603200 |
| C | -1.90588800 | 2.90524300  | -2.49948300 |
| C | -0.09249800 | 4.01408900  | -1.52821000 |
| C | -2.40412100 | 3.64247700  | -1.35584300 |
| C | -1.27760200 | 4.29558000  | -0.73372400 |
| F | 2.78296100  | 1.87529400  | 5.16053100  |
| C | 2.38138100  | 1.34305500  | 3.94645300  |
| C | 2.79496300  | 0.05651600  | 3.54939500  |
| C | 1.54671300  | 2.07339400  | 3.08754200  |
| C | 2.37730700  | -0.46311500 | 2.31048400  |
| F | 3.60332400  | -0.68865500 | 4.39464900  |
| C | 1.17854000  | 1.47842300  | 1.86933500  |
| F | 1.10250300  | 3.34436100  | 3.43719800  |
| C | 1.54601800  | 0.22317700  | 1.38541200  |
| F | 2.79892700  | -1.76005000 | 2.02464100  |
| F | 0.29096100  | 2.33651200  | 1.08829300  |
| B | 1.15620300  | -0.44290800 | -0.11150200 |
| C | 2.65325800  | -0.88561300 | -0.74564100 |
| C | 0.07874600  | -1.70430100 | 0.03156900  |
| C | 0.50720600  | 0.64601700  | -1.24082700 |
| C | 3.11085600  | -2.19873000 | -1.01408200 |
| C | 3.61907800  | 0.10311400  | -1.05585900 |
| C | -0.60860000 | -2.08958400 | 1.20399000  |
| C | -0.30672500 | -2.46753200 | -1.09956900 |
| H | 1.30605300  | 1.23732900  | -1.70133100 |
| H | 0.03805100  | 0.05219800  | -2.04548900 |
| C | 4.36048900  | -2.50280900 | -1.59309700 |
| F | 2.34216600  | -3.31328500 | -0.66984200 |
| C | 4.88045500  | -0.14527200 | -1.62679700 |
| F | 3.35919600  | 1.46005700  | -0.76112900 |
| C | -1.54938200 | -3.13728300 | 1.27672700  |
| F | -0.41384700 | -1.40218700 | 2.41522100  |
| C | -1.23891600 | -3.51939000 | -1.08522600 |
| F | 0.27225100  | -2.20198900 | -2.35264000 |
| C | 5.25398400  | -1.46824000 | -1.91356900 |
| F | 4.72532500  | -3.82230400 | -1.83531400 |
| F | 5.75642600  | 0.90127800  | -1.90468700 |
| C | -1.86933600 | -3.86454700 | 0.12167400  |
| F | -2.18418300 | -3.43702300 | 2.47843500  |
| F | -1.54693800 | -4.21570100 | -2.24994200 |
| F | 6.48727100  | -1.74684500 | -2.48583200 |
| F | -2.80818900 | -4.88707400 | 0.16407600  |
| C | -3.85204000 | 3.77192300  | -0.94351100 |
| H | -3.96893900 | 3.95776100  | 0.13290200  |
| H | -4.31336700 | 4.62412700  | -1.47240200 |
| H | -4.44021400 | 2.87875900  | -1.18942100 |
| C | -2.74061900 | 2.14903600  | -3.50960100 |
| H | -2.22442800 | 1.25844700  | -3.89613800 |
| H | -3.70510300 | 1.82634500  | -3.09762800 |
| H | -2.95693900 | 2.79653400  | -4.37708800 |
| C | 0.38043300  | 2.77444900  | -3.80220500 |
| H | 0.12722200  | 1.77987200  | -4.19371900 |

|   |             |             |             |
|---|-------------|-------------|-------------|
| H | 0.23806500  | 3.49677000  | -4.62479200 |
| H | 1.44950700  | 2.77221700  | -3.55458300 |
| C | 1.28705300  | 4.57922900  | -1.28059500 |
| H | 2.08265100  | 3.91029900  | -1.63255800 |
| H | 1.40244100  | 5.53756000  | -1.81663500 |
| H | 1.46952100  | 4.78177000  | -0.21663400 |
| C | -1.33251800 | 5.20033300  | 0.47779900  |
| H | -0.42254400 | 5.14008600  | 1.08994800  |
| H | -1.43876300 | 6.25155600  | 0.15849500  |
| H | -2.18753800 | 4.97210300  | 1.12901300  |
| H | -3.22062500 | 1.04937000  | 2.48979900  |
| H | -3.86025800 | -0.66543100 | -1.45588300 |
| O | -6.03046700 | -1.89858800 | -0.93469900 |
| C | -7.18964300 | -2.70342800 | -0.53275200 |
| H | -7.48982700 | -3.23588600 | -1.44308900 |
| H | -6.91745400 | -3.43051700 | 0.24997800  |
| H | -8.02070800 | -2.06701000 | -0.18450200 |

|                |          |          |          |
|----------------|----------|----------|----------|
| Frequencies -- | 8.1723   | 14.7664  | 18.1089  |
| Frequencies -- | 24.0198  | 27.2928  | 30.9379  |
| Frequencies -- | 33.9997  | 34.7291  | 38.5840  |
| Frequencies -- | 41.0032  | 49.9793  | 57.0469  |
| Frequencies -- | 71.7492  | 76.9417  | 78.4581  |
| Frequencies -- | 83.3162  | 94.1052  | 99.8831  |
| Frequencies -- | 106.1843 | 110.4078 | 114.5650 |
| Frequencies -- | 117.2703 | 119.3055 | 124.4521 |
| Frequencies -- | 125.4874 | 132.4677 | 134.9779 |
| Frequencies -- | 138.5590 | 144.7467 | 147.1760 |
| Frequencies -- | 149.3069 | 154.6543 | 158.6767 |
| Frequencies -- | 159.7736 | 162.0162 | 165.4233 |
| Frequencies -- | 169.3716 | 172.5874 | 197.7054 |
| Frequencies -- | 204.4590 | 216.8642 | 219.5050 |
| Frequencies -- | 221.8285 | 224.4301 | 237.0383 |
| Frequencies -- | 257.6124 | 260.6566 | 264.0144 |
| Frequencies -- | 265.0155 | 265.3687 | 275.9616 |
| Frequencies -- | 278.2910 | 279.1494 | 283.1268 |
| Frequencies -- | 289.4655 | 299.0075 | 301.9583 |
| Frequencies -- | 303.7316 | 304.7175 | 306.8571 |
| Frequencies -- | 315.2645 | 320.8945 | 325.1028 |
| Frequencies -- | 332.1988 | 339.5107 | 356.0072 |
| Frequencies -- | 365.2963 | 374.9632 | 377.2584 |
| Frequencies -- | 380.0670 | 381.2256 | 387.8708 |
| Frequencies -- | 393.2726 | 399.1147 | 409.3034 |
| Frequencies -- | 420.1207 | 431.4328 | 432.3304 |
| Frequencies -- | 443.9864 | 450.5562 | 454.4634 |
| Frequencies -- | 458.8828 | 467.6277 | 473.7136 |
| Frequencies -- | 498.6306 | 535.0001 | 536.6062 |
| Frequencies -- | 539.3538 | 542.3009 | 547.4569 |
| Frequencies -- | 555.8550 | 557.5333 | 568.3449 |
| Frequencies -- | 580.0116 | 588.8056 | 601.3271 |
| Frequencies -- | 602.9349 | 606.5150 | 612.9963 |
| Frequencies -- | 624.3371 | 635.0881 | 636.7377 |
| Frequencies -- | 641.5141 | 652.9208 | 660.1558 |
| Frequencies -- | 673.6364 | 677.3644 | 705.4357 |
| Frequencies -- | 717.1224 | 729.9084 | 736.1409 |
| Frequencies -- | 746.6816 | 747.9710 | 758.2429 |
| Frequencies -- | 765.8865 | 780.7288 | 799.6598 |
| Frequencies -- | 804.1490 | 827.6165 | 829.4145 |
| Frequencies -- | 842.5074 | 863.7427 | 868.8813 |
| Frequencies -- | 873.5038 | 906.9575 | 911.1114 |
| Frequencies -- | 949.7284 | 960.7081 | 968.3258 |



|                |           |           |           |
|----------------|-----------|-----------|-----------|
| Frequencies -- | 970.5400  | 982.5925  | 987.5165  |
| Frequencies -- | 1008.2864 | 1022.1796 | 1024.2070 |
| Frequencies -- | 1032.4390 | 1040.8387 | 1043.3493 |
| Frequencies -- | 1044.4781 | 1045.3504 | 1047.5726 |
| Frequencies -- | 1048.8534 | 1049.7675 | 1056.4548 |
| Frequencies -- | 1087.2970 | 1088.6097 | 1097.3002 |
| Frequencies -- | 1106.8097 | 1124.9033 | 1127.4711 |
| Frequencies -- | 1164.0942 | 1173.5909 | 1174.0493 |
| Frequencies -- | 1174.4226 | 1200.4841 | 1202.5428 |
| Frequencies -- | 1208.7709 | 1212.2458 | 1274.4959 |
| Frequencies -- | 1295.0953 | 1300.0032 | 1313.4734 |
| Frequencies -- | 1319.7813 | 1337.7415 | 1343.9954 |
| Frequencies -- | 1348.3472 | 1384.8783 | 1389.4809 |
| Frequencies -- | 1409.4233 | 1412.3496 | 1414.0032 |
| Frequencies -- | 1416.3951 | 1420.4541 | 1424.4327 |
| Frequencies -- | 1425.2117 | 1427.9747 | 1430.3610 |
| Frequencies -- | 1434.2694 | 1446.6278 | 1448.7250 |
| Frequencies -- | 1451.2440 | 1456.6867 | 1462.3384 |
| Frequencies -- | 1466.4711 | 1469.8075 | 1471.4752 |
| Frequencies -- | 1480.0699 | 1484.8098 | 1485.3339 |
| Frequencies -- | 1489.5488 | 1490.0374 | 1491.2629 |
| Frequencies -- | 1496.6441 | 1498.0703 | 1504.5026 |
| Frequencies -- | 1505.0133 | 1509.5163 | 1514.5050 |
| Frequencies -- | 1521.1511 | 1590.2870 | 1590.5429 |
| Frequencies -- | 1593.5138 | 1597.6631 | 1616.7280 |
| Frequencies -- | 1619.7040 | 1621.6168 | 1629.8796 |
| Frequencies -- | 2998.1033 | 3009.8548 | 3010.3357 |
| Frequencies -- | 3011.1902 | 3011.6607 | 3012.9689 |
| Frequencies -- | 3026.9189 | 3098.2647 | 3099.0199 |
| Frequencies -- | 3100.2599 | 3102.3152 | 3102.7244 |
| Frequencies -- | 3105.7912 | 3136.6162 | 3140.4137 |
| Frequencies -- | 3142.9151 | 3146.0306 | 3146.8721 |
| Frequencies -- | 3151.4546 | 3161.4412 | 3174.3687 |
| Frequencies -- | 3206.2710 | 3217.8304 | 3221.2674 |

**Catalyst 18:**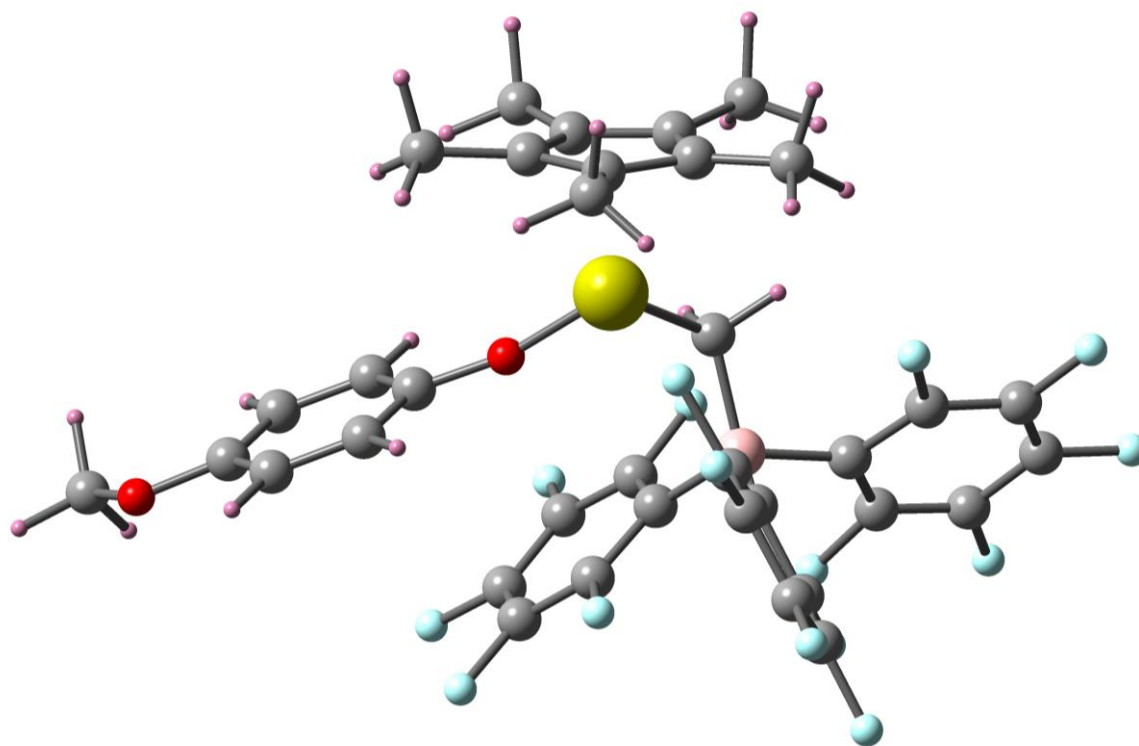

| <b>vacuum</b> | <b>toluene-like solvent</b> | <b>D3 dispersion</b> |
|---------------|-----------------------------|----------------------|
| -3116.3970301 | -3116.4086275               | -0.54456212          |

|    |             |             |             |
|----|-------------|-------------|-------------|
| Ti | -0.87396500 | 1.92111800  | -0.61646700 |
| O  | -2.22148500 | 0.82555800  | -0.20935200 |
| C  | -3.44633900 | 0.23043100  | 0.05538200  |
| C  | -4.08319700 | 0.44614800  | 1.30458400  |
| C  | -4.04267700 | -0.61598300 | -0.90492200 |
| C  | -5.30548700 | -0.18205600 | 1.58128500  |
| C  | -5.27169800 | -1.24785600 | -0.62934900 |
| C  | -5.91028600 | -1.03293800 | 0.61836600  |
| H  | -5.80394400 | -0.03989200 | 2.53981500  |
| H  | -5.70441000 | -1.90487000 | -1.38177700 |
| C  | 0.04724900  | 4.08486400  | -1.33513100 |
| C  | -0.24749200 | 3.31451600  | -2.51377300 |
| C  | -1.19932500 | 4.32065100  | -0.62497400 |
| C  | -1.67878800 | 3.04974300  | -2.52256800 |
| C  | -2.27002300 | 3.71385200  | -1.37883600 |
| F  | 2.43836800  | 1.58985100  | 5.38953700  |
| C  | 2.12927200  | 1.12200600  | 4.12307800  |
| C  | 2.60497000  | -0.12660000 | 3.67802800  |
| C  | 1.32749200  | 1.88041800  | 3.25720700  |
| C  | 2.28153500  | -0.58059300 | 2.38606900  |
| F  | 3.38060400  | -0.90077600 | 4.52784700  |
| C  | 1.05493200  | 1.35186800  | 1.98459000  |
| F  | 0.82229500  | 3.11468300  | 3.65252700  |
| C  | 1.49126600  | 0.13937400  | 1.45070600  |
| F  | 2.75568100  | -1.84851200 | 2.05474800  |

|   |             |             |             |
|---|-------------|-------------|-------------|
| F | 0.18609000  | 2.22860100  | 1.20463400  |
| B | 1.21129300  | -0.44331600 | -0.10469400 |
| C | 2.74761100  | -0.85466400 | -0.66153300 |
| C | 0.12978600  | -1.70967200 | -0.10439100 |
| C | 0.63900200  | 0.70880900  | -1.21281000 |
| C | 3.22255100  | -2.15284100 | -0.96947300 |
| C | 3.73140200  | 0.14595500  | -0.85450500 |
| C | -0.63384700 | -2.15765700 | 0.99652500  |
| C | -0.17690900 | -2.40909600 | -1.29893600 |
| H | 1.46612600  | 1.32926400  | -1.57381500 |
| H | 0.24017200  | 0.16086300  | -2.08532500 |
| C | 4.50688800  | -2.42976500 | -1.48203000 |
| F | 2.43398200  | -3.28218300 | -0.73413500 |
| C | 5.02742600  | -0.07573500 | -1.35461800 |
| F | 3.45335300  | 1.48601400  | -0.50488600 |
| C | -1.57569900 | -3.20609800 | 0.94889100  |
| F | -0.52107300 | -1.53908700 | 2.25394400  |
| C | -1.10802300 | -3.45655100 | -1.40471000 |
| F | 0.48441700  | -2.07794200 | -2.49416500 |
| C | 5.41920600  | -1.38249100 | -1.68746300 |
| F | 4.88681700  | -3.73574600 | -1.77050300 |
| F | 5.91943600  | 0.98139300  | -1.51769700 |
| C | -1.81647400 | -3.86708200 | -0.26359700 |
| F | -2.28906000 | -3.57000100 | 2.08639100  |
| F | -1.34265100 | -4.08321900 | -2.62613000 |
| F | 6.68718800  | -1.63398500 | -2.19250200 |
| F | -2.75869100 | -4.88507900 | -0.34303300 |
| C | -2.43166100 | 2.36356900  | -3.64133700 |
| H | -3.38822900 | 1.94403800  | -3.30364800 |
| H | -2.65784100 | 3.08814400  | -4.44295100 |
| H | -1.84949500 | 1.55096700  | -4.09854600 |
| C | 0.70986600  | 2.99556000  | -3.63659000 |
| H | 0.50755400  | 2.02016800  | -4.09968400 |
| H | 0.62146000  | 3.75984000  | -4.42823900 |
| H | 1.75521700  | 2.99451900  | -3.30274200 |
| C | 1.40228100  | 4.62736600  | -0.94196500 |
| H | 2.21960800  | 3.93913000  | -1.19361700 |
| H | 1.59734000  | 5.57461000  | -1.47468900 |
| H | 1.46741700  | 4.84373200  | 0.13248800  |
| C | -1.35212600 | 5.14793000  | 0.63259700  |
| H | -0.51683800 | 5.00931500  | 1.33251300  |
| H | -1.38456500 | 6.22096600  | 0.37624600  |
| H | -2.27998800 | 4.91690400  | 1.17371000  |
| C | -3.74800300 | 3.83000600  | -1.08547500 |
| H | -3.95684700 | 3.95740800  | -0.01474000 |
| H | -4.15959800 | 4.71392900  | -1.60336900 |
| H | -4.31610500 | 2.95710900  | -1.43151800 |
| H | -3.61020900 | 1.08291600  | 2.05306100  |
| H | -3.54011500 | -0.79037700 | -1.85671300 |
| O | -7.12491200 | -1.60030000 | 1.01179800  |
| C | -7.78836400 | -2.55269600 | 0.11428400  |
| H | -7.14697900 | -3.42681500 | -0.08660500 |
| H | -8.68636200 | -2.87081700 | 0.65712400  |
| H | -8.08016300 | -2.07339400 | -0.83561600 |

Frequencies -- 7.5647 12.7391 15.2558  
Frequencies -- 19.8669 25.0064 27.1103

|                |           |           |           |
|----------------|-----------|-----------|-----------|
| Frequencies -- | 31.2519   | 32.1054   | 35.6522   |
| Frequencies -- | 40.6437   | 48.4536   | 56.3366   |
| Frequencies -- | 73.5716   | 76.1605   | 83.1641   |
| Frequencies -- | 86.4432   | 95.0224   | 100.2605  |
| Frequencies -- | 104.6187  | 107.4687  | 111.3391  |
| Frequencies -- | 111.5086  | 116.9911  | 120.2884  |
| Frequencies -- | 123.1302  | 126.5800  | 129.7674  |
| Frequencies -- | 130.0174  | 136.9543  | 137.6414  |
| Frequencies -- | 145.0189  | 149.0128  | 156.6973  |
| Frequencies -- | 158.4963  | 161.2974  | 164.1070  |
| Frequencies -- | 168.6305  | 172.7447  | 193.2254  |
| Frequencies -- | 209.5854  | 215.7981  | 220.6307  |
| Frequencies -- | 222.8953  | 228.2324  | 231.2048  |
| Frequencies -- | 255.3099  | 264.1380  | 264.8702  |
| Frequencies -- | 265.0971  | 268.9195  | 275.8341  |
| Frequencies -- | 278.6083  | 279.7267  | 285.5858  |
| Frequencies -- | 290.2914  | 294.4481  | 300.7279  |
| Frequencies -- | 303.0237  | 304.7184  | 306.6469  |
| Frequencies -- | 315.6267  | 325.2129  | 332.1564  |
| Frequencies -- | 339.2847  | 354.6142  | 365.2000  |
| Frequencies -- | 374.3988  | 377.0359  | 379.0673  |
| Frequencies -- | 379.9801  | 384.5483  | 396.8160  |
| Frequencies -- | 398.2983  | 405.9234  | 415.9195  |
| Frequencies -- | 417.5906  | 424.7006  | 431.4109  |
| Frequencies -- | 432.2203  | 443.4779  | 451.4194  |
| Frequencies -- | 458.8293  | 467.7702  | 474.0789  |
| Frequencies -- | 504.8203  | 519.6024  | 534.5153  |
| Frequencies -- | 537.0852  | 539.4267  | 542.4210  |
| Frequencies -- | 547.4220  | 555.2808  | 566.1587  |
| Frequencies -- | 579.7776  | 582.6162  | 593.9831  |
| Frequencies -- | 604.1461  | 606.1281  | 614.4366  |
| Frequencies -- | 624.6335  | 634.4691  | 636.5153  |
| Frequencies -- | 637.0322  | 641.4871  | 656.1767  |
| Frequencies -- | 673.0962  | 705.4153  | 713.3269  |
| Frequencies -- | 717.3965  | 730.0023  | 736.1006  |
| Frequencies -- | 746.3448  | 747.9194  | 765.5560  |
| Frequencies -- | 768.2223  | 800.6902  | 803.0658  |
| Frequencies -- | 804.4378  | 823.6683  | 828.0896  |
| Frequencies -- | 840.3844  | 868.7560  | 873.9193  |
| Frequencies -- | 906.3113  | 911.1672  | 922.3615  |
| Frequencies -- | 947.1629  | 966.2672  | 966.4714  |
| Frequencies -- | 971.0611  | 981.7480  | 990.3888  |
| Frequencies -- | 1008.0763 | 1010.5719 | 1022.2394 |
| Frequencies -- | 1032.4533 | 1040.7467 | 1043.3805 |
| Frequencies -- | 1044.4946 | 1045.2741 | 1047.9769 |
| Frequencies -- | 1048.9892 | 1050.1900 | 1055.9210 |
| Frequencies -- | 1086.5138 | 1088.8137 | 1116.7370 |
| Frequencies -- | 1120.8233 | 1124.8992 | 1125.9873 |
| Frequencies -- | 1172.2647 | 1173.6401 | 1174.6931 |
| Frequencies -- | 1187.1938 | 1202.2068 | 1208.6043 |
| Frequencies -- | 1211.7938 | 1228.5753 | 1261.1170 |
| Frequencies -- | 1295.3498 | 1313.2947 | 1314.3526 |
| Frequencies -- | 1320.0236 | 1337.5374 | 1344.0184 |
| Frequencies -- | 1348.0887 | 1361.4953 | 1388.9718 |
| Frequencies -- | 1409.8783 | 1412.6300 | 1415.3040 |
| Frequencies -- | 1416.1110 | 1420.5923 | 1424.0580 |
| Frequencies -- | 1424.8794 | 1427.9812 | 1430.8378 |
| Frequencies -- | 1433.8069 | 1437.2031 | 1449.8653 |
| Frequencies -- | 1451.2727 | 1454.9739 | 1463.1087 |
| Frequencies -- | 1466.3301 | 1469.4925 | 1471.7696 |
| Frequencies -- | 1480.6384 | 1484.9734 | 1487.3702 |
| Frequencies -- | 1488.5232 | 1492.3904 | 1496.2166 |
| Frequencies -- | 1497.7065 | 1502.6402 | 1505.1885 |

|                |           |           |           |
|----------------|-----------|-----------|-----------|
| Frequencies -- | 1506.2590 | 1508.0887 | 1513.6738 |
| Frequencies -- | 1519.0574 | 1583.1983 | 1590.4064 |
| Frequencies -- | 1593.5630 | 1598.1476 | 1616.6710 |
| Frequencies -- | 1621.0827 | 1626.6671 | 1630.2048 |
| Frequencies -- | 2996.4934 | 3009.2345 | 3009.9799 |
| Frequencies -- | 3010.9759 | 3012.0220 | 3013.2258 |
| Frequencies -- | 3026.0117 | 3096.9002 | 3098.2571 |
| Frequencies -- | 3099.9199 | 3102.2356 | 3103.2808 |
| Frequencies -- | 3105.3201 | 3134.1025 | 3137.7997 |
| Frequencies -- | 3143.2291 | 3145.1033 | 3147.1871 |
| Frequencies -- | 3151.2882 | 3161.6619 | 3187.8266 |
| Frequencies -- | 3191.8894 | 3211.6239 | 3216.1068 |

**Catalyst 19:**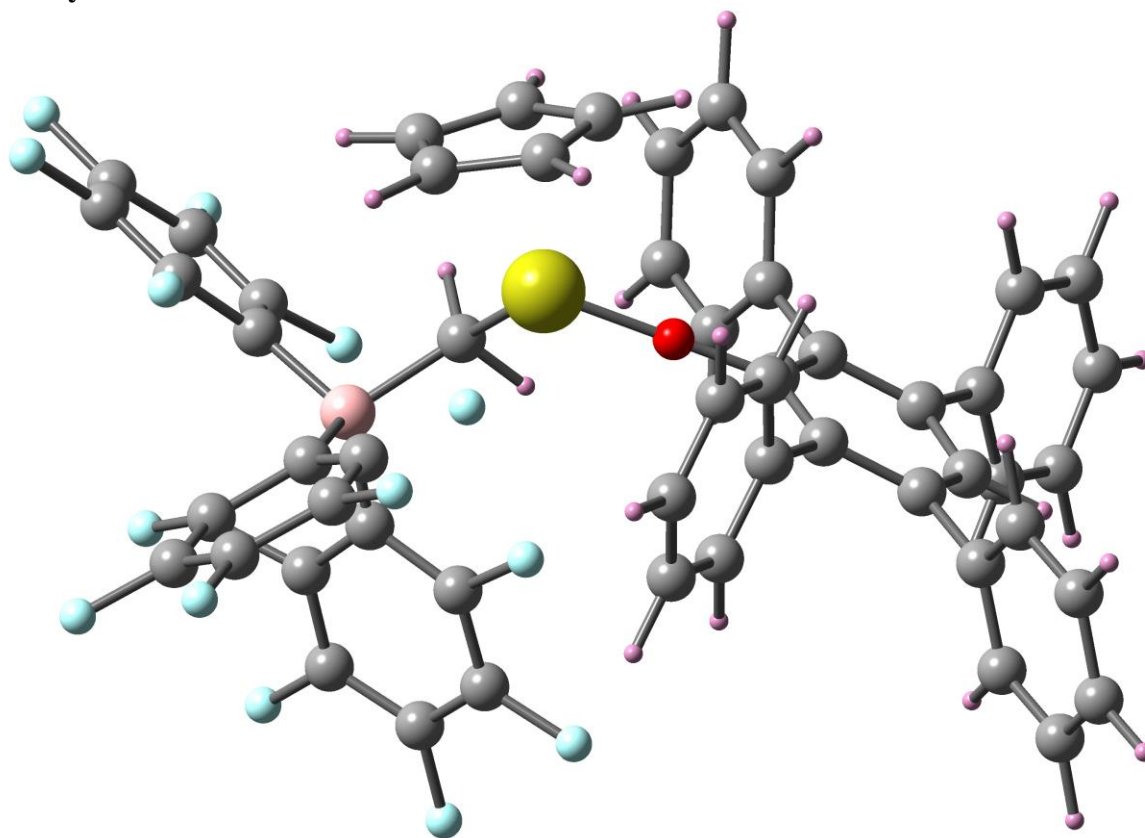

| <b>vacuum</b> | <b>toluene-like solvent</b> | <b>D3 dispersion</b> |
|---------------|-----------------------------|----------------------|
| -3729.222843  | -3729.2393371               | -0.75515753          |

|    |             |             |             |
|----|-------------|-------------|-------------|
| Ti | 0.09081100  | -0.38725900 | -1.89443500 |
| O  | -1.56120000 | -0.05913500 | -1.33376900 |
| C  | -2.85376000 | 0.19696900  | -0.89544200 |
| C  | -3.24946600 | 1.55434600  | -0.69296500 |
| C  | -3.68196400 | -0.92142900 | -0.57582000 |
| C  | -4.51569300 | 1.78950200  | -0.08139100 |
| C  | -4.94084600 | -0.65999000 | 0.03910900  |
| C  | -5.31500100 | 0.68162100  | 0.28726700  |
| H  | -6.28806700 | 0.87261400  | 0.73802300  |
| C  | 0.73856800  | 0.89213400  | -3.82337500 |
| C  | 1.87482200  | 0.05211400  | -3.57074800 |
| C  | -0.37578800 | 0.04686300  | -4.16935800 |
| C  | 1.46272700  | -1.30838300 | -3.73791400 |
| C  | 0.07220200  | -1.31470600 | -4.10640100 |
| F  | 1.01401200  | 0.90499300  | 6.01401600  |
| C  | 1.38837200  | 0.72042700  | 4.69062200  |
| C  | 2.64904900  | 1.13959900  | 4.23534100  |
| C  | 0.51800700  | 0.09700900  | 3.78167500  |
| C  | 3.01198300  | 0.94473100  | 2.88537000  |
| F  | 3.53317200  | 1.73811100  | 5.12488900  |
| C  | 0.92793500  | -0.07084800 | 2.44684500  |
| F  | -0.72936400 | -0.35326200 | 4.20718900  |
| C  | 2.16748400  | 0.35675100  | 1.91143200  |

|   |             |             |             |
|---|-------------|-------------|-------------|
| F | 4.30353900  | 1.36404300  | 2.56298200  |
| F | 0.00704800  | -0.74964100 | 1.62152800  |
| B | 2.51759600  | 0.07307000  | 0.29078500  |
| C | 3.84942500  | 0.87839400  | -0.29227500 |
| C | 2.74669900  | -1.59610800 | 0.30177000  |
| C | 1.23582800  | 0.71639600  | -0.63760300 |
| C | 4.85002900  | 0.33202500  | -1.12545000 |
| C | 3.99652900  | 2.27549500  | -0.09983700 |
| C | 3.84019400  | -2.17951300 | 0.99700500  |
| C | 1.91182300  | -2.57197100 | -0.24357500 |
| H | 0.41933100  | 1.03355500  | 0.03153700  |
| H | 1.60844200  | 1.62088400  | -1.13422600 |
| C | 5.93675800  | 1.05752700  | -1.65699900 |
| F | 4.79452600  | -1.01901500 | -1.51911800 |
| C | 5.06026000  | 3.04631600  | -0.60061100 |
| F | 3.02567500  | 2.98186600  | 0.62384400  |
| C | 4.07916000  | -3.56191800 | 1.09880400  |
| F | 4.77399900  | -1.35398200 | 1.61877900  |
| C | 2.07914400  | -3.96709500 | -0.19740300 |
| F | 0.70376900  | -2.17841200 | -0.95202300 |
| C | 6.05323800  | 2.42871100  | -1.38153800 |
| F | 6.88145600  | 0.43054900  | -2.46331200 |
| F | 5.13601800  | 4.41012300  | -0.34046500 |
| C | 3.19228000  | -4.47165100 | 0.49201500  |
| F | 5.18486600  | -4.04193300 | 1.78394200  |
| F | 1.18180500  | -4.82897600 | -0.81303900 |
| F | 7.11276000  | 3.16609600  | -1.89053500 |
| F | 3.41028400  | -5.83717900 | 0.57303000  |
| C | -5.05321600 | 3.16729300  | 0.20144900  |
| C | -5.34255000 | 4.08735100  | -0.83895000 |
| C | -5.34702600 | 3.54944500  | 1.53673200  |
| C | -5.90070100 | 5.35097400  | -0.55356500 |
| H | -5.14530500 | 3.81154400  | -1.87543100 |
| C | -5.89759300 | 4.81597500  | 1.82597700  |
| H | -5.13020000 | 2.85828700  | 2.35413900  |
| C | -6.17750400 | 5.72303300  | 0.78052000  |
| H | -6.12077400 | 6.04114400  | -1.37148000 |
| H | -6.10507400 | 5.09228100  | 2.86243800  |
| H | -6.60625800 | 6.70318900  | 1.00155000  |
| C | -5.90333300 | -1.74437700 | 0.44441400  |
| C | -6.48878400 | -2.62005800 | -0.50587400 |
| C | -6.29394100 | -1.86906700 | 1.80346500  |
| C | -7.43086000 | -3.59221200 | -0.10952500 |
| H | -6.21835800 | -2.53444100 | -1.55900600 |
| C | -7.22981400 | -2.84604100 | 2.20398600  |
| H | -5.85239600 | -1.20843500 | 2.55276400  |
| C | -7.80323300 | -3.71243400 | 1.24761800  |
| H | -7.87400900 | -4.25190100 | -0.85933300 |
| H | -7.50736300 | -2.93031000 | 3.25731900  |
| H | -8.52996700 | -4.46814400 | 1.55452100  |
| C | -2.33103400 | 2.68924000  | -1.06564900 |
| C | -2.19910900 | 3.10872200  | -2.41381900 |
| C | -1.60279700 | 3.38774900  | -0.06973600 |
| C | -1.37116600 | 4.19903200  | -2.75768500 |
| H | -2.76838800 | 2.59780000  | -3.19424600 |
| C | -0.76449600 | 4.47007400  | -0.40980300 |
| H | -1.69382300 | 3.08453700  | 0.97501700  |

|                |             |             |             |
|----------------|-------------|-------------|-------------|
| C              | -0.64749400 | 4.88246600  | -1.75549400 |
| H              | -1.30165500 | 4.52045900  | -3.80006600 |
| H              | -0.20638300 | 4.98891000  | 0.37235200  |
| H              | -0.00579300 | 5.72673000  | -2.01714800 |
| C              | -3.19834100 | -2.32361400 | -0.82990500 |
| C              | -3.18098300 | -2.86141300 | -2.14245700 |
| C              | -2.77776600 | -3.14889600 | 0.24361900  |
| C              | -2.77166400 | -4.19223100 | -2.37478000 |
| H              | -3.51549000 | -2.24562000 | -2.98101000 |
| C              | -2.36367200 | -4.47719400 | 0.01362400  |
| H              | -2.77708800 | -2.75081700 | 1.25970600  |
| C              | -2.36206500 | -5.00556500 | -1.29570500 |
| H              | -2.78283600 | -4.59475000 | -3.39087100 |
| H              | -2.04282800 | -5.09673300 | 0.85396500  |
| H              | -2.04319500 | -6.03488700 | -1.47244500 |
| H              | 2.09069700  | -2.18500200 | -3.60689600 |
| H              | 2.86568900  | 0.38785700  | -3.29240900 |
| H              | 0.71941000  | 1.97581100  | -3.76197700 |
| H              | -1.37754800 | 0.38041500  | -4.42080800 |
| H              | -0.53420800 | -2.19742000 | -4.28960800 |
| Frequencies -- | -3.7725     | 6.8849      | 11.5397     |
| Frequencies -- | 15.4379     | 21.5998     | 25.3561     |
| Frequencies -- | 29.1955     | 30.9721     | 33.0668     |
| Frequencies -- | 37.1086     | 37.4379     | 39.3815     |
| Frequencies -- | 41.6101     | 44.8511     | 45.5476     |
| Frequencies -- | 49.9215     | 54.0205     | 56.0034     |
| Frequencies -- | 57.7435     | 62.2279     | 66.5287     |
| Frequencies -- | 69.0287     | 74.6168     | 86.4932     |
| Frequencies -- | 105.2658    | 109.3858    | 114.4322    |
| Frequencies -- | 116.2059    | 120.0732    | 126.4832    |
| Frequencies -- | 130.9312    | 133.4476    | 136.2012    |
| Frequencies -- | 140.8117    | 146.8744    | 148.4328    |
| Frequencies -- | 155.4420    | 158.1867    | 168.2468    |
| Frequencies -- | 168.8070    | 183.3003    | 194.1114    |
| Frequencies -- | 198.2848    | 208.3913    | 211.1780    |
| Frequencies -- | 214.3010    | 218.1316    | 223.1429    |
| Frequencies -- | 228.6135    | 236.0893    | 246.3144    |
| Frequencies -- | 249.2034    | 251.5656    | 264.2836    |
| Frequencies -- | 264.5438    | 264.5884    | 270.5078    |
| Frequencies -- | 273.3757    | 277.8096    | 281.5671    |
| Frequencies -- | 290.0978    | 300.3287    | 304.8577    |
| Frequencies -- | 306.5795    | 319.1360    | 324.3028    |
| Frequencies -- | 328.0797    | 330.5834    | 332.4714    |
| Frequencies -- | 347.0556    | 354.8580    | 362.9538    |
| Frequencies -- | 375.4394    | 377.4674    | 379.5037    |
| Frequencies -- | 394.4943    | 402.6587    | 403.9332    |
| Frequencies -- | 404.3730    | 406.6142    | 407.0033    |
| Frequencies -- | 409.1043    | 420.3667    | 430.4239    |
| Frequencies -- | 430.9481    | 431.8849    | 444.9716    |
| Frequencies -- | 454.1850    | 459.4457    | 468.9109    |
| Frequencies -- | 488.8782    | 517.2924    | 526.1710    |
| Frequencies -- | 526.2012    | 541.3262    | 542.9123    |
| Frequencies -- | 544.9522    | 548.4494    | 552.8000    |
| Frequencies -- | 560.9766    | 569.3715    | 577.7995    |
| Frequencies -- | 588.5151    | 610.4916    | 612.0321    |
| Frequencies -- | 616.1687    | 617.4046    | 619.4168    |
| Frequencies -- | 624.2333    | 625.6520    | 632.2511    |
| Frequencies -- | 633.3926    | 636.9340    | 643.1265    |
| Frequencies -- | 644.5737    | 652.7606    | 654.8627    |
| Frequencies -- | 679.0694    | 690.1824    | 698.0213    |



|                |           |           |           |
|----------------|-----------|-----------|-----------|
| Frequencies -- | 702.0193  | 709.4052  | 709.8069  |
| Frequencies -- | 713.5135  | 714.5876  | 715.7006  |
| Frequencies -- | 726.9750  | 738.1885  | 741.8176  |
| Frequencies -- | 742.3429  | 744.6824  | 746.9440  |
| Frequencies -- | 764.3541  | 765.8496  | 772.2188  |
| Frequencies -- | 776.8008  | 783.3383  | 793.8426  |
| Frequencies -- | 797.3069  | 808.2124  | 808.3897  |
| Frequencies -- | 828.4490  | 837.3015  | 840.7713  |
| Frequencies -- | 841.9773  | 857.9964  | 859.0655  |
| Frequencies -- | 859.6255  | 860.6293  | 864.8393  |
| Frequencies -- | 867.0026  | 868.6742  | 880.3557  |
| Frequencies -- | 901.0515  | 904.9338  | 911.8112  |
| Frequencies -- | 914.5236  | 934.1124  | 935.1844  |
| Frequencies -- | 941.3059  | 943.2760  | 971.6695  |
| Frequencies -- | 984.7199  | 985.3623  | 992.3246  |
| Frequencies -- | 993.8487  | 994.9594  | 995.9814  |
| Frequencies -- | 1000.7998 | 1004.2537 | 1004.5751 |
| Frequencies -- | 1010.2303 | 1012.3238 | 1014.2457 |
| Frequencies -- | 1020.0063 | 1022.7720 | 1028.4108 |
| Frequencies -- | 1029.0172 | 1033.0881 | 1038.6453 |
| Frequencies -- | 1039.3537 | 1045.8291 | 1046.8378 |
| Frequencies -- | 1049.1296 | 1049.8107 | 1053.2996 |
| Frequencies -- | 1053.9109 | 1059.5251 | 1068.0819 |
| Frequencies -- | 1087.5790 | 1088.7834 | 1089.7256 |
| Frequencies -- | 1091.0219 | 1091.5168 | 1092.4384 |
| Frequencies -- | 1127.8373 | 1128.9830 | 1142.5209 |
| Frequencies -- | 1183.2883 | 1183.4214 | 1184.0618 |
| Frequencies -- | 1184.6582 | 1203.5346 | 1203.7848 |
| Frequencies -- | 1204.6434 | 1205.6761 | 1206.4770 |
| Frequencies -- | 1210.9863 | 1215.1222 | 1236.0662 |
| Frequencies -- | 1268.8866 | 1281.8763 | 1284.9214 |
| Frequencies -- | 1296.8925 | 1309.0374 | 1316.1030 |
| Frequencies -- | 1321.4397 | 1323.9401 | 1327.0153 |
| Frequencies -- | 1329.1179 | 1332.4434 | 1334.6125 |
| Frequencies -- | 1338.1758 | 1344.7391 | 1349.5031 |
| Frequencies -- | 1366.8097 | 1367.7458 | 1369.2715 |
| Frequencies -- | 1371.0697 | 1379.5873 | 1390.5056 |
| Frequencies -- | 1396.1457 | 1403.2680 | 1411.1706 |
| Frequencies -- | 1418.0203 | 1421.8400 | 1442.4402 |
| Frequencies -- | 1442.6987 | 1443.8217 | 1444.9332 |
| Frequencies -- | 1446.1365 | 1450.1562 | 1459.9958 |
| Frequencies -- | 1466.4151 | 1467.7672 | 1471.6461 |
| Frequencies -- | 1496.3203 | 1496.5774 | 1501.8545 |
| Frequencies -- | 1510.7439 | 1533.1521 | 1589.0341 |
| Frequencies -- | 1590.0989 | 1592.8394 | 1594.1873 |
| Frequencies -- | 1595.2258 | 1595.6352 | 1597.2149 |
| Frequencies -- | 1598.9313 | 1616.1936 | 1619.3010 |
| Frequencies -- | 1623.3321 | 1624.2413 | 1624.4956 |
| Frequencies -- | 1624.8572 | 1628.9991 | 3040.7931 |
| Frequencies -- | 3131.8837 | 3148.0259 | 3148.5889 |
| Frequencies -- | 3153.7632 | 3154.0164 | 3160.6970 |
| Frequencies -- | 3160.8041 | 3161.8114 | 3161.9362 |
| Frequencies -- | 3170.0407 | 3170.4716 | 3173.8139 |
| Frequencies -- | 3173.9116 | 3179.2147 | 3181.5218 |
| Frequencies -- | 3185.4827 | 3185.9887 | 3193.6371 |
| Frequencies -- | 3195.7958 | 3196.0195 | 3196.5162 |
| Frequencies -- | 3196.8959 | 3240.1914 | 3250.2489 |
| Frequencies -- | 3259.0848 | 3271.2403 | 3299.6922 |

**Catalyst 20:****distal conformation**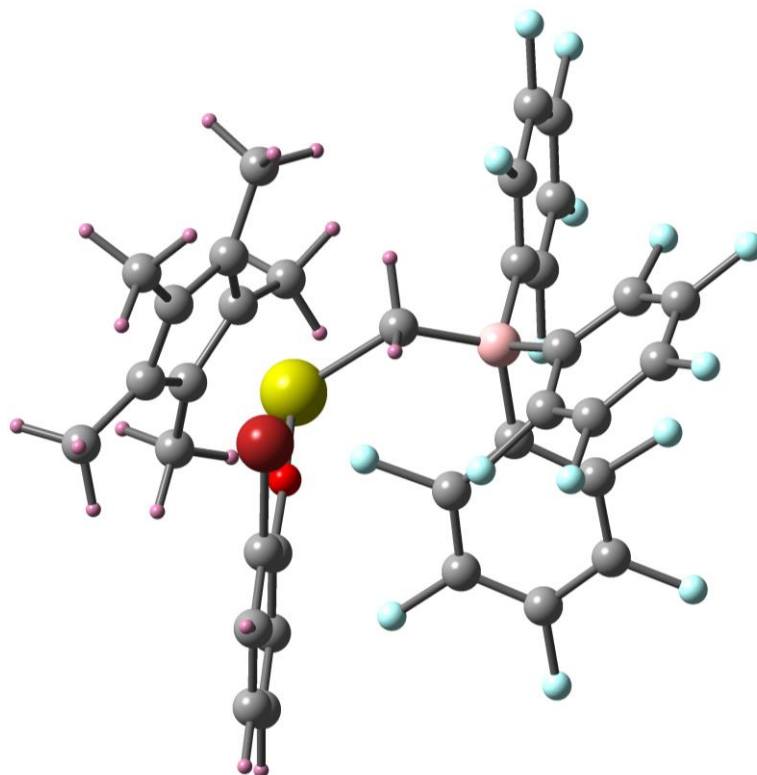

| <b>vacuum</b> | <b>toluene-like solvent</b> | <b>D3 dispersion</b> |
|---------------|-----------------------------|----------------------|
| -3014.4739881 | -3014.484886                | -0.53393418          |

|    |             |             |             |
|----|-------------|-------------|-------------|
| Ti | -1.35198000 | -1.59496000 | -0.30151000 |
| O  | -2.75438600 | -0.50764300 | -0.00915700 |
| C  | -3.87245600 | 0.19280400  | 0.37183200  |
| C  | -4.58066700 | 1.02760500  | -0.53402300 |
| C  | -4.32144900 | 0.10645800  | 1.71657700  |
| C  | -5.70614000 | 1.75882100  | -0.10425400 |
| C  | -5.44299800 | 0.83859400  | 2.14646900  |
| C  | -6.13824000 | 1.66510900  | 1.23623100  |
| H  | -6.23524100 | 2.40098000  | -0.80846000 |
| H  | -5.76730600 | 0.76751500  | 3.18634700  |
| H  | -7.00659200 | 2.24007100  | 1.56159800  |
| C  | -1.94582000 | -3.13505200 | -1.97709600 |
| C  | -0.52031700 | -3.36527700 | -1.78065900 |
| C  | -2.64168100 | -3.53722600 | -0.77049100 |
| C  | -0.33697900 | -3.83981800 | -0.43710100 |
| C  | -1.64523000 | -3.93367800 | 0.19372300  |
| F  | -0.04884000 | 0.88738400  | 5.80016500  |
| C  | 0.28428800  | 0.73901300  | 4.46413400  |
| C  | 1.23732200  | 1.57909100  | 3.85807500  |
| C  | -0.31234000 | -0.26352700 | 3.68499600  |

|    |             |             |             |
|----|-------------|-------------|-------------|
| C  | 1.55111500  | 1.41987400  | 2.49405400  |
| F  | 1.86270700  | 2.55582100  | 4.61772400  |
| C  | 0.06006600  | -0.35213700 | 2.33512700  |
| F  | -1.24707100 | -1.13535200 | 4.23656800  |
| C  | 0.95839600  | 0.45455800  | 1.63685700  |
| F  | 2.55291300  | 2.25968500  | 2.01027200  |
| F  | -0.54923700 | -1.49856100 | 1.66706600  |
| B  | 1.31838100  | 0.36128100  | -0.00664300 |
| C  | 1.36459400  | 1.95653000  | -0.53099000 |
| C  | 2.74002600  | -0.47652500 | -0.26040800 |
| C  | 0.13216400  | -0.40160500 | -0.98262400 |
| C  | 2.48304900  | 2.66660400  | -1.02845100 |
| C  | 0.19116300  | 2.74750000  | -0.48200800 |
| C  | 3.49431500  | -1.16152600 | 0.71975700  |
| C  | 3.29225800  | -0.60879900 | -1.56096300 |
| H  | -0.58582600 | 0.36481800  | -1.34022900 |
| H  | 0.65343600  | -0.79778000 | -1.85806200 |
| C  | 2.43331700  | 3.99229200  | -1.50649800 |
| F  | 3.75861400  | 2.09381500  | -1.02800300 |
| C  | 0.08819000  | 4.07508600  | -0.93455600 |
| F  | -0.98148400 | 2.21272100  | 0.08560300  |
| C  | 4.68345600  | -1.87793600 | 0.46511100  |
| F  | 3.08110700  | -1.19169100 | 2.06289900  |
| C  | 4.47080300  | -1.30936700 | -1.87065800 |
| F  | 2.65822500  | 0.00143400  | -2.65400800 |
| C  | 1.22382200  | 4.70439900  | -1.47004400 |
| F  | 3.57841400  | 4.61107900  | -1.99549000 |
| F  | -1.11619200 | 4.76721100  | -0.85073100 |
| C  | 5.18400200  | -1.95054500 | -0.84311800 |
| F  | 5.35527300  | -2.52244900 | 1.49879500  |
| F  | 4.93717600  | -1.37497200 | -3.17937500 |
| F  | 1.15513200  | 6.00966700  | -1.93628700 |
| F  | 6.34842600  | -2.65210900 | -1.12003200 |
| C  | 0.96233800  | -4.27396300 | 0.19915500  |
| H  | 1.03910200  | -3.96876300 | 1.25242900  |
| H  | 1.04007300  | -5.37486900 | 0.17751100  |
| H  | 1.83614000  | -3.87587400 | -0.32897200 |
| C  | 0.52435500  | -3.30130300 | -2.86850000 |
| H  | 1.53537700  | -3.14860500 | -2.47471700 |
| H  | 0.53183500  | -4.25244500 | -3.42884600 |
| H  | 0.32728400  | -2.50122400 | -3.59465400 |
| C  | -2.59124600 | -2.73789200 | -3.28609600 |
| H  | -1.97179300 | -2.03587400 | -3.86115800 |
| H  | -2.73718500 | -3.63240300 | -3.91628700 |
| H  | -3.57385100 | -2.27163400 | -3.14418500 |
| C  | -4.13955400 | -3.59879900 | -0.58155300 |
| H  | -4.67100400 | -2.88133100 | -1.21996600 |
| H  | -4.50568000 | -4.60623700 | -0.84566900 |
| H  | -4.44036800 | -3.40713300 | 0.45751900  |
| C  | -1.91475200 | -4.48020500 | 1.57782900  |
| H  | -2.85315900 | -4.09952400 | 2.00423800  |
| H  | -2.00196400 | -5.57980900 | 1.53503600  |
| H  | -1.10789800 | -4.24778300 | 2.28542700  |
| H  | -3.76976400 | -0.52589700 | 2.41317100  |
| Br | -4.00429500 | 1.18998700  | -2.39965300 |

Frequencies --

-7.0157

7.2636

18.2285

|                |           |           |           |
|----------------|-----------|-----------|-----------|
| Frequencies -- | 19.1958   | 24.4494   | 27.6565   |
| Frequencies -- | 29.4234   | 31.8630   | 38.5578   |
| Frequencies -- | 41.3128   | 45.2063   | 49.7239   |
| Frequencies -- | 62.3097   | 71.8067   | 80.1467   |
| Frequencies -- | 90.9628   | 98.4476   | 99.9401   |
| Frequencies -- | 104.3113  | 107.3951  | 112.1837  |
| Frequencies -- | 117.9222  | 119.5832  | 121.6957  |
| Frequencies -- | 122.5009  | 129.6544  | 134.4157  |
| Frequencies -- | 137.1396  | 137.9453  | 144.5381  |
| Frequencies -- | 149.2561  | 155.5778  | 157.0567  |
| Frequencies -- | 159.9006  | 163.9455  | 165.7333  |
| Frequencies -- | 168.6201  | 171.7178  | 201.7500  |
| Frequencies -- | 210.5352  | 217.2653  | 220.7087  |
| Frequencies -- | 228.0664  | 233.7419  | 259.7082  |
| Frequencies -- | 263.4771  | 264.1563  | 264.7726  |
| Frequencies -- | 274.0400  | 275.7240  | 277.7854  |
| Frequencies -- | 280.5493  | 286.8685  | 290.3952  |
| Frequencies -- | 294.5994  | 299.3773  | 302.9109  |
| Frequencies -- | 303.1385  | 304.6746  | 315.1054  |
| Frequencies -- | 320.3084  | 330.9202  | 334.0401  |
| Frequencies -- | 342.8825  | 347.8791  | 372.1303  |
| Frequencies -- | 374.2704  | 378.4090  | 379.0329  |
| Frequencies -- | 381.2904  | 387.2460  | 393.1780  |
| Frequencies -- | 396.2938  | 417.8569  | 431.2701  |
| Frequencies -- | 432.9217  | 442.2921  | 444.7573  |
| Frequencies -- | 453.6227  | 458.0333  | 465.9161  |
| Frequencies -- | 483.9969  | 521.8214  | 533.3938  |
| Frequencies -- | 535.7979  | 538.0242  | 540.0476  |
| Frequencies -- | 545.1837  | 548.2513  | 553.5379  |
| Frequencies -- | 565.8382  | 580.0729  | 587.0061  |
| Frequencies -- | 596.3428  | 603.6682  | 611.3911  |
| Frequencies -- | 625.2542  | 632.6083  | 635.4227  |
| Frequencies -- | 636.9379  | 642.7512  | 651.9378  |
| Frequencies -- | 670.3351  | 686.2563  | 698.8787  |
| Frequencies -- | 708.1906  | 718.4672  | 729.5963  |
| Frequencies -- | 733.8651  | 743.7603  | 747.9604  |
| Frequencies -- | 763.0575  | 764.5088  | 799.4438  |
| Frequencies -- | 802.2130  | 816.4422  | 838.9676  |
| Frequencies -- | 858.9577  | 861.0962  | 875.8155  |
| Frequencies -- | 905.6560  | 914.6178  | 928.2321  |
| Frequencies -- | 952.3986  | 964.5784  | 970.7689  |
| Frequencies -- | 989.4996  | 990.1117  | 1002.6009 |
| Frequencies -- | 1020.9291 | 1026.3341 | 1027.6619 |
| Frequencies -- | 1040.3945 | 1042.0564 | 1043.8422 |
| Frequencies -- | 1044.8456 | 1045.3244 | 1047.1384 |
| Frequencies -- | 1048.3744 | 1052.2387 | 1055.6314 |
| Frequencies -- | 1067.1838 | 1085.8140 | 1089.1179 |
| Frequencies -- | 1124.4524 | 1133.3979 | 1172.8523 |
| Frequencies -- | 1174.5616 | 1184.2586 | 1202.3486 |
| Frequencies -- | 1211.3638 | 1213.6471 | 1259.8332 |
| Frequencies -- | 1280.2081 | 1297.2547 | 1316.8729 |
| Frequencies -- | 1319.3651 | 1338.9256 | 1342.5683 |
| Frequencies -- | 1346.2116 | 1358.0344 | 1386.7749 |
| Frequencies -- | 1409.1952 | 1410.6171 | 1412.1705 |
| Frequencies -- | 1413.8220 | 1421.2635 | 1422.0556 |
| Frequencies -- | 1425.3771 | 1427.9987 | 1428.6977 |
| Frequencies -- | 1434.5134 | 1436.2820 | 1447.2590 |
| Frequencies -- | 1453.3170 | 1462.4425 | 1467.3639 |
| Frequencies -- | 1468.5154 | 1469.1188 | 1473.0757 |
| Frequencies -- | 1478.3100 | 1489.5253 | 1490.0845 |
| Frequencies -- | 1495.9920 | 1497.2199 | 1501.7445 |
| Frequencies -- | 1502.6932 | 1508.5164 | 1513.8270 |
| Frequencies -- | 1523.5259 | 1579.2213 | 1589.0228 |

|                |           |           |           |
|----------------|-----------|-----------|-----------|
| Frequencies -- | 1594.1533 | 1596.0997 | 1597.0112 |
| Frequencies -- | 1617.3180 | 1618.9492 | 1631.7110 |
| Frequencies -- | 2984.7705 | 3009.9208 | 3011.1734 |
| Frequencies -- | 3012.6460 | 3012.8450 | 3015.0816 |
| Frequencies -- | 3097.4944 | 3100.0960 | 3102.4857 |
| Frequencies -- | 3103.7231 | 3107.4531 | 3137.7740 |
| Frequencies -- | 3141.9237 | 3149.9124 | 3154.0738 |
| Frequencies -- | 3160.7313 | 3164.1096 | 3173.2474 |
| Frequencies -- | 3187.5532 | 3199.9500 | 3210.3279 |

### proximal conformation

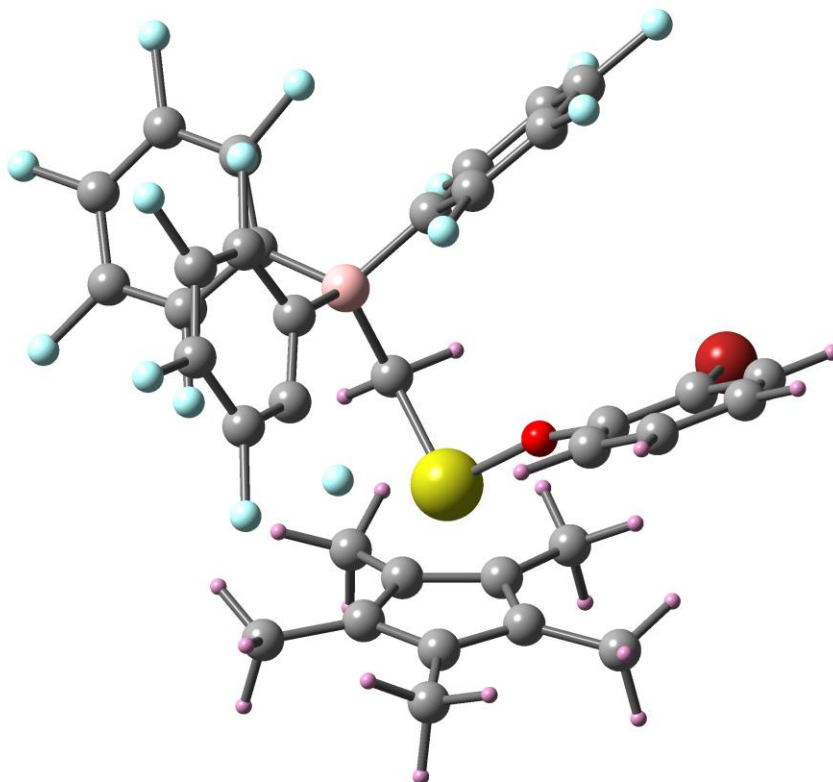

| vacuum        | toluene-like solvent | D3 dispersion |
|---------------|----------------------|---------------|
| -3014.4793039 | -3014.4902653        | -0.53676847   |

|    |            |             |             |
|----|------------|-------------|-------------|
| Ti | 1.19062800 | -1.66508800 | -0.59997200 |
| O  | 2.35062700 | -0.52173500 | 0.16805400  |
| C  | 3.38036200 | 0.02915100  | 0.89713600  |
| C  | 3.55157700 | -0.35934000 | 2.25212800  |
| C  | 4.26086700 | 1.00038600  | 0.35012200  |
| C  | 4.56993800 | 0.20660000  | 3.03934000  |
| C  | 5.28277500 | 1.56831800  | 1.13766700  |
| C  | 5.43853500 | 1.17147100  | 2.48286100  |
| H  | 4.67732800 | -0.09638400 | 4.08235800  |
| H  | 5.94466200 | 2.31889500  | 0.70561500  |
| H  | 6.22668700 | 1.62252600  | 3.08756500  |
| C  | 0.71544800 | -3.15039800 | -2.49790500 |
| C  | 2.03923900 | -2.57194800 | -2.63101900 |

|   |             |             |             |
|---|-------------|-------------|-------------|
| C | 0.71010000  | -3.95600200 | -1.30399000 |
| C | 2.86973200  | -3.07504600 | -1.54977700 |
| C | 2.04072000  | -3.90933500 | -0.71654100 |
| F | -2.21498200 | -2.00765200 | 5.30748900  |
| C | -1.96633900 | -1.46370300 | 4.05831600  |
| C | -2.58288600 | -0.26225300 | 3.65712000  |
| C | -1.09064000 | -2.09687900 | 3.16428800  |
| C | -2.31710000 | 0.27107900  | 2.38255500  |
| F | -3.44108100 | 0.38616800  | 4.53198000  |
| C | -0.88254800 | -1.49392300 | 1.91257000  |
| F | -0.45126500 | -3.28299300 | 3.51185500  |
| C | -1.44646400 | -0.31640300 | 1.42507400  |
| F | -2.94697700 | 1.47740600  | 2.08616600  |
| F | 0.05496700  | -2.25308400 | 1.09073200  |
| B | -1.25391800 | 0.35994100  | -0.10900300 |
| C | -2.83729000 | 0.38045800  | -0.68060200 |
| C | -0.52429000 | 1.84963600  | -0.03232200 |
| C | -0.35152600 | -0.53527200 | -1.24887200 |
| C | -3.65720300 | 1.51385800  | -0.90264200 |
| C | -3.50025200 | -0.83809400 | -0.96232200 |
| C | 0.16208200  | 2.38983100  | 1.07725900  |
| C | -0.45534700 | 2.68154900  | -1.17820300 |
| H | -1.02517300 | -1.07434600 | -1.91993000 |
| H | 0.22627900  | 0.18248200  | -1.86724500 |
| C | -4.97189500 | 1.45370500  | -1.41126000 |
| F | -3.20980300 | 2.79878400  | -0.59201600 |
| C | -4.80849400 | -0.95538200 | -1.46468400 |
| F | -2.84630900 | -2.06450100 | -0.71019400 |
| C | 0.80337900  | 3.64566500  | 1.08866500  |
| F | 0.27341400  | 1.66563400  | 2.27819200  |
| C | 0.16455100  | 3.94182700  | -1.22131600 |
| F | -1.04275700 | 2.25606400  | -2.38028400 |
| C | -5.55446500 | 0.21007100  | -1.70463900 |
| F | -5.70480700 | 2.61690300  | -1.61416400 |
| F | -5.36603200 | -2.20606000 | -1.71959300 |
| C | 0.79704400  | 4.43809600  | -0.06866600 |
| F | 1.45663800  | 4.09694100  | 2.23171700  |
| F | 0.16666000  | 4.69621700  | -2.38977600 |
| F | -6.84521300 | 0.13196800  | -2.20766700 |
| F | 1.42514500  | 5.67589900  | -0.08368800 |
| C | 4.35829100  | -2.85992400 | -1.40046600 |
| H | 4.68637600  | -2.89254300 | -0.35276300 |
| H | 4.90133000  | -3.65796600 | -1.93621000 |
| H | 4.68765600  | -1.90257000 | -1.82275400 |
| C | 2.51640700  | -1.73899600 | -3.79936100 |
| H | 1.71266500  | -1.12642900 | -4.22988600 |
| H | 3.34034900  | -1.06727800 | -3.52804800 |
| H | 2.88489100  | -2.40106800 | -4.60251000 |
| C | -0.38869400 | -3.07054900 | -3.52354100 |
| H | -0.42093800 | -2.09809600 | -4.03298000 |
| H | -0.22856600 | -3.83895300 | -4.29982900 |
| H | -1.37751900 | -3.25288600 | -3.08472200 |
| C | -0.44094200 | -4.80031100 | -0.80809200 |
| H | -1.41516200 | -4.34657300 | -1.02790700 |
| H | -0.41853500 | -5.78781400 | -1.30148700 |
| H | -0.39143200 | -4.97901300 | 0.27401300  |
| C | 2.48999600  | -4.67794900 | 0.50666600  |

|    |            |             |             |
|----|------------|-------------|-------------|
| H  | 1.70389200 | -4.75097300 | 1.27117200  |
| H  | 2.76024300 | -5.71029600 | 0.22430400  |
| H  | 3.37621200 | -4.23042600 | 0.97719800  |
| H  | 2.86286800 | -1.09117500 | 2.67599500  |
| Br | 4.07257800 | 1.58793600  | -1.51177200 |

|                |           |           |           |
|----------------|-----------|-----------|-----------|
| Frequencies -- | 8.6014    | 19.0755   | 24.8614   |
| Frequencies -- | 25.8908   | 28.0571   | 28.7596   |
| Frequencies -- | 33.8134   | 34.0640   | 38.4929   |
| Frequencies -- | 42.7469   | 46.8601   | 57.5405   |
| Frequencies -- | 61.3120   | 77.3162   | 89.4521   |
| Frequencies -- | 97.9850   | 107.0653  | 109.0079  |
| Frequencies -- | 111.3498  | 112.9756  | 117.5892  |
| Frequencies -- | 120.6282  | 124.3536  | 127.8006  |
| Frequencies -- | 129.4772  | 136.5036  | 138.3773  |
| Frequencies -- | 138.5888  | 142.0124  | 143.8412  |
| Frequencies -- | 148.2548  | 157.1858  | 159.0801  |
| Frequencies -- | 160.5083  | 163.8626  | 168.9515  |
| Frequencies -- | 170.3116  | 174.5899  | 201.6392  |
| Frequencies -- | 208.4451  | 216.7731  | 222.6317  |
| Frequencies -- | 224.8740  | 228.2154  | 243.9827  |
| Frequencies -- | 263.7310  | 264.6077  | 264.8185  |
| Frequencies -- | 274.3757  | 274.9757  | 276.5538  |
| Frequencies -- | 280.0986  | 292.4356  | 292.9556  |
| Frequencies -- | 299.4256  | 301.3476  | 303.9026  |
| Frequencies -- | 306.0679  | 308.6146  | 315.7025  |
| Frequencies -- | 323.7556  | 329.3811  | 336.0875  |
| Frequencies -- | 349.7299  | 357.0100  | 362.3835  |
| Frequencies -- | 371.5593  | 375.8229  | 377.6263  |
| Frequencies -- | 379.5975  | 390.2389  | 401.7035  |
| Frequencies -- | 407.5198  | 414.4000  | 430.9008  |
| Frequencies -- | 432.1885  | 442.4175  | 444.3334  |
| Frequencies -- | 453.7779  | 459.2353  | 466.7356  |
| Frequencies -- | 485.3774  | 501.1782  | 533.5355  |
| Frequencies -- | 535.8569  | 537.7946  | 541.2296  |
| Frequencies -- | 543.2002  | 547.6980  | 556.8118  |
| Frequencies -- | 566.1382  | 581.0408  | 587.5240  |
| Frequencies -- | 599.2771  | 601.9658  | 608.6068  |
| Frequencies -- | 623.7722  | 631.8070  | 633.2761  |
| Frequencies -- | 636.0863  | 642.3346  | 656.7892  |
| Frequencies -- | 670.2421  | 683.5895  | 702.8866  |
| Frequencies -- | 705.1428  | 716.5705  | 728.7068  |
| Frequencies -- | 735.5242  | 743.4104  | 745.2669  |
| Frequencies -- | 763.2860  | 765.0031  | 801.4022  |
| Frequencies -- | 805.1852  | 823.6655  | 841.1185  |
| Frequencies -- | 859.7707  | 865.2530  | 874.2270  |
| Frequencies -- | 905.1316  | 912.3181  | 924.0345  |
| Frequencies -- | 952.9668  | 971.0832  | 972.3056  |
| Frequencies -- | 981.5511  | 991.3377  | 1003.3004 |
| Frequencies -- | 1021.9855 | 1026.2179 | 1029.6661 |
| Frequencies -- | 1041.5351 | 1043.2739 | 1044.8779 |
| Frequencies -- | 1045.8191 | 1047.7778 | 1049.1338 |
| Frequencies -- | 1050.6026 | 1051.9206 | 1056.5003 |
| Frequencies -- | 1074.4225 | 1088.2012 | 1091.3708 |
| Frequencies -- | 1126.8911 | 1133.4616 | 1172.3338 |
| Frequencies -- | 1175.2055 | 1184.4341 | 1202.2378 |
| Frequencies -- | 1209.9665 | 1214.2511 | 1254.1970 |
| Frequencies -- | 1276.0014 | 1293.9682 | 1315.4473 |
| Frequencies -- | 1321.6185 | 1339.4351 | 1345.6526 |
| Frequencies -- | 1350.1950 | 1357.6689 | 1383.6259 |
| Frequencies -- | 1411.0118 | 1412.7563 | 1414.5735 |
| Frequencies -- | 1416.9687 | 1422.2644 | 1425.8628 |

|                |           |           |           |
|----------------|-----------|-----------|-----------|
| Frequencies -- | 1428.3620 | 1429.0529 | 1429.4910 |
| Frequencies -- | 1435.5080 | 1436.1539 | 1448.4719 |
| Frequencies -- | 1451.5678 | 1461.7732 | 1466.7568 |
| Frequencies -- | 1467.7363 | 1469.8292 | 1471.5805 |
| Frequencies -- | 1480.4967 | 1492.6539 | 1493.1541 |
| Frequencies -- | 1498.2256 | 1500.8407 | 1505.5815 |
| Frequencies -- | 1507.1983 | 1510.7657 | 1516.5985 |
| Frequencies -- | 1520.5756 | 1579.4662 | 1590.4794 |
| Frequencies -- | 1593.4885 | 1597.2298 | 1597.2971 |
| Frequencies -- | 1617.3132 | 1622.2566 | 1630.3046 |
| Frequencies -- | 2983.5395 | 3009.7438 | 3010.3142 |
| Frequencies -- | 3012.5680 | 3012.7764 | 3013.9855 |
| Frequencies -- | 3098.1130 | 3102.3502 | 3104.6548 |
| Frequencies -- | 3105.4359 | 3108.9216 | 3134.1729 |
| Frequencies -- | 3144.6773 | 3147.4673 | 3151.1793 |
| Frequencies -- | 3154.4901 | 3158.0255 | 3174.2036 |
| Frequencies -- | 3187.4845 | 3199.5735 | 3211.0351 |



**Catalyst 21:****distal conformation**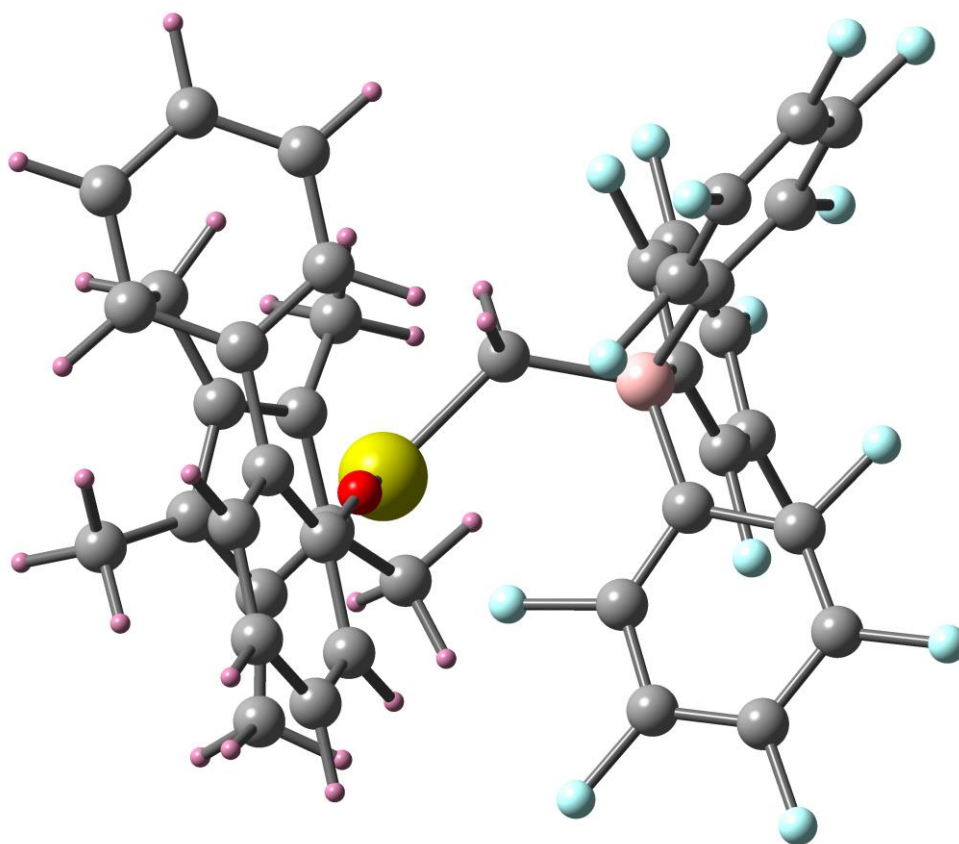

| <b>vacuum</b> | <b>toluene-like solvent</b> | <b>D3 dispersion</b> |
|---------------|-----------------------------|----------------------|
| -3232.864866  | -3232.8760882               | -0.60492324          |

|    |             |             |             |
|----|-------------|-------------|-------------|
| Ti | -1.36046000 | -1.39847100 | -0.34563900 |
| O  | -2.68063800 | -0.36044900 | 0.29526800  |
| C  | -3.82705800 | 0.04705000  | 0.96682800  |
| C  | -4.80553700 | 0.87271200  | 0.33289700  |
| C  | -4.00099300 | -0.39929300 | 2.30193700  |
| C  | -5.95987600 | 1.20299700  | 1.09299300  |
| C  | -5.14882800 | -0.03872000 | 3.03045900  |
| C  | -6.13820000 | 0.76270500  | 2.41933600  |
| H  | -6.71400200 | 1.84512400  | 0.63522400  |
| H  | -5.26579500 | -0.37840300 | 4.06158000  |
| H  | -7.03219200 | 1.05379300  | 2.97366500  |
| C  | -2.07739800 | -2.52553700 | -2.29739900 |
| C  | -0.69123000 | -2.93351800 | -2.14014300 |
| C  | -2.84178700 | -3.06917300 | -1.18929000 |
| C  | -0.58956300 | -3.65782500 | -0.90091800 |
| C  | -1.91736000 | -3.73775200 | -0.30966600 |
| F  | 0.60572400  | -0.17298300 | 5.93568900  |
| C  | 0.81610000  | -0.07476100 | 4.57055600  |

|   |             |             |             |
|---|-------------|-------------|-------------|
| C | 1.74081800  | 0.84622400  | 4.04444400  |
| C | 0.11998200  | -0.90344800 | 3.67795300  |
| C | 1.93203900  | 0.93661300  | 2.65119100  |
| F | 2.46213200  | 1.65421700  | 4.91004800  |
| C | 0.36729900  | -0.74372200 | 2.30660200  |
| F | -0.79025200 | -1.84851700 | 4.14336800  |
| C | 1.23548100  | 0.15811300  | 1.68895400  |
| F | 2.91868400  | 1.83468600  | 2.24535600  |
| F | -0.34153400 | -1.72958400 | 1.49805100  |
| B | 1.45636900  | 0.33047900  | 0.02702200  |
| C | 1.64339500  | 1.98047700  | -0.23517300 |
| C | 2.76074400  | -0.57179200 | -0.50059500 |
| C | 0.11426900  | -0.13283000 | -0.92927800 |
| C | 2.79778600  | 2.64989700  | -0.70778800 |
| C | 0.57421300  | 2.86715200  | 0.03554300  |
| C | 3.54007900  | -1.45685700 | 0.27964600  |
| C | 3.17880100  | -0.53443400 | -1.85607500 |
| H | -0.58372600 | 0.72429900  | -1.00888100 |
| H | 0.49744700  | -0.33595700 | -1.93367800 |
| C | 2.86584000  | 4.03457100  | -0.96575400 |
| F | 3.99965200  | 1.96232000  | -0.90338800 |
| C | 0.58889700  | 4.25426900  | -0.19560500 |
| F | -0.61326900 | 2.37091600  | 0.61364900  |
| C | 4.62835100  | -2.21369600 | -0.20595800 |
| F | 3.26337500  | -1.65972000 | 1.64249900  |
| C | 4.25342400  | -1.26458500 | -2.39218400 |
| F | 2.51434700  | 0.29778800  | -2.77056700 |
| C | 1.74871900  | 4.84849000  | -0.71838200 |
| F | 4.03829200  | 4.60748600  | -1.44523600 |
| F | -0.52729500 | 5.03635000  | 0.09078700  |
| C | 4.99530400  | -2.11640100 | -1.55620900 |
| F | 5.33336000  | -3.06210900 | 0.64160200  |
| F | 4.58893900  | -1.15352300 | -3.73743500 |
| F | 1.79424300  | 6.21277400  | -0.96801100 |
| F | 6.05828400  | -2.85286900 | -2.05876900 |
| C | 0.64809600  | -4.33080200 | -0.35508000 |
| H | 0.65233500  | -4.37610000 | 0.74230100  |
| H | 0.70167100  | -5.37069700 | -0.72209400 |
| H | 1.56952400  | -3.82795700 | -0.67110800 |
| C | 0.38142800  | -2.79888800 | -3.19315700 |
| H | 1.38977800  | -2.88954900 | -2.77509600 |
| H | 0.26422600  | -3.60218600 | -3.94134400 |
| H | 0.32842000  | -1.84517700 | -3.73466700 |
| C | -2.65051900 | -1.81522900 | -3.50357300 |
| H | -1.91533900 | -1.15602300 | -3.98446100 |
| H | -2.96586000 | -2.55615000 | -4.25914600 |
| H | -3.52944500 | -1.20640800 | -3.25684400 |
| C | -4.34529100 | -3.03284400 | -1.04650800 |
| H | -4.79086400 | -2.16558600 | -1.54892800 |
| H | -4.77850900 | -3.93720700 | -1.50871300 |
| H | -4.67139300 | -3.01617300 | 0.00189400  |
| C | -2.27366000 | -4.48504900 | 0.95642300  |
| H | -3.19614800 | -4.10681600 | 1.41747900  |
| H | -2.43880700 | -5.55266000 | 0.72951900  |
| H | -1.47720100 | -4.43652300 | 1.71150000  |
| H | -3.23267800 | -1.02232200 | 2.75950000  |
| C | -4.67532600 | 1.39656800  | -1.06547000 |

|   |             |            |             |
|---|-------------|------------|-------------|
| C | -5.72339500 | 1.19594100 | -2.00423200 |
| C | -3.55023900 | 2.16325300 | -1.46860000 |
| C | -5.64679600 | 1.73486600 | -3.30625000 |
| H | -6.59914300 | 0.61036000 | -1.71571000 |
| C | -3.47563200 | 2.70864600 | -2.76750700 |
| H | -2.75413200 | 2.36287600 | -0.75407800 |
| C | -4.52075000 | 2.49464200 | -3.69363000 |
| H | -6.46419100 | 1.56609800 | -4.01145500 |
| H | -2.60953700 | 3.31227500 | -3.04898200 |
| H | -4.46293500 | 2.92137400 | -4.69748800 |

|                |           |           |           |
|----------------|-----------|-----------|-----------|
| Frequencies -- | 7.8014    | 15.8826   | 22.6321   |
| Frequencies -- | 23.7060   | 28.6256   | 31.0137   |
| Frequencies -- | 31.7594   | 33.4577   | 41.0530   |
| Frequencies -- | 43.2242   | 47.6186   | 51.1945   |
| Frequencies -- | 54.7726   | 60.4875   | 81.4860   |
| Frequencies -- | 87.9860   | 93.5591   | 95.0101   |
| Frequencies -- | 98.9853   | 105.0682  | 106.8344  |
| Frequencies -- | 108.6929  | 114.3973  | 118.6505  |
| Frequencies -- | 124.0895  | 124.9300  | 125.9970  |
| Frequencies -- | 128.4675  | 132.4846  | 136.7026  |
| Frequencies -- | 137.9870  | 142.7281  | 146.8937  |
| Frequencies -- | 150.2347  | 157.4484  | 159.6979  |
| Frequencies -- | 161.1114  | 167.2459  | 170.2120  |
| Frequencies -- | 181.0900  | 200.2068  | 213.6681  |
| Frequencies -- | 219.5257  | 223.2519  | 231.0817  |
| Frequencies -- | 252.8937  | 263.9607  | 264.3161  |
| Frequencies -- | 265.0279  | 269.9165  | 276.3109  |
| Frequencies -- | 278.0726  | 281.4647  | 285.0254  |
| Frequencies -- | 291.0322  | 292.0652  | 298.0065  |
| Frequencies -- | 298.8830  | 299.3356  | 303.8456  |
| Frequencies -- | 304.8884  | 312.0017  | 321.4279  |
| Frequencies -- | 330.4348  | 333.3984  | 334.9228  |
| Frequencies -- | 345.1934  | 359.3575  | 372.9180  |
| Frequencies -- | 375.9257  | 380.4470  | 380.8338  |
| Frequencies -- | 385.3308  | 390.3284  | 396.0474  |
| Frequencies -- | 398.6402  | 408.9841  | 418.3996  |
| Frequencies -- | 431.4470  | 432.6684  | 442.4488  |
| Frequencies -- | 453.4911  | 457.6888  | 465.2751  |
| Frequencies -- | 466.3375  | 503.2348  | 530.2778  |
| Frequencies -- | 534.3491  | 536.2782  | 539.9793  |
| Frequencies -- | 541.5956  | 545.8089  | 549.3652  |
| Frequencies -- | 555.7766  | 565.1831  | 566.1054  |
| Frequencies -- | 581.0368  | 587.6085  | 597.8320  |
| Frequencies -- | 605.2414  | 609.8252  | 614.3593  |
| Frequencies -- | 621.6870  | 625.7894  | 635.9555  |
| Frequencies -- | 637.2564  | 642.7816  | 652.4648  |
| Frequencies -- | 656.4482  | 675.5033  | 700.9993  |
| Frequencies -- | 713.3661  | 719.0939  | 729.0841  |
| Frequencies -- | 734.3617  | 738.9344  | 741.9866  |
| Frequencies -- | 743.9694  | 748.1289  | 764.5999  |
| Frequencies -- | 767.0253  | 780.3134  | 801.0396  |
| Frequencies -- | 804.2699  | 819.2699  | 839.8966  |
| Frequencies -- | 857.2855  | 866.8344  | 875.6127  |
| Frequencies -- | 876.5375  | 905.3594  | 912.8470  |
| Frequencies -- | 916.6609  | 939.4957  | 959.4326  |
| Frequencies -- | 966.6131  | 973.9382  | 989.2966  |
| Frequencies -- | 991.9793  | 992.7067  | 998.6124  |
| Frequencies -- | 1005.7651 | 1009.8139 | 1020.0251 |
| Frequencies -- | 1026.8285 | 1036.9187 | 1040.0205 |
| Frequencies -- | 1043.6909 | 1044.1741 | 1044.5180 |
| Frequencies -- | 1046.0059 | 1047.9838 | 1048.6679 |

|                |           |           |           |
|----------------|-----------|-----------|-----------|
| Frequencies -- | 1050.2920 | 1055.3528 | 1061.8439 |
| Frequencies -- | 1065.5834 | 1088.2003 | 1090.0431 |
| Frequencies -- | 1091.4682 | 1126.5377 | 1126.8931 |
| Frequencies -- | 1172.3928 | 1175.5114 | 1183.9820 |
| Frequencies -- | 1186.0649 | 1202.4778 | 1209.3082 |
| Frequencies -- | 1210.6716 | 1213.1379 | 1226.4502 |
| Frequencies -- | 1265.4857 | 1297.7757 | 1300.0072 |
| Frequencies -- | 1315.8827 | 1318.3775 | 1337.5001 |
| Frequencies -- | 1337.8085 | 1342.2265 | 1344.8853 |
| Frequencies -- | 1357.4906 | 1371.4855 | 1396.0823 |
| Frequencies -- | 1410.8316 | 1412.0544 | 1412.5158 |
| Frequencies -- | 1415.0191 | 1419.2747 | 1424.3699 |
| Frequencies -- | 1428.2641 | 1428.5928 | 1430.3536 |
| Frequencies -- | 1433.8578 | 1435.9158 | 1447.6002 |
| Frequencies -- | 1452.5542 | 1453.4406 | 1462.7096 |
| Frequencies -- | 1467.2941 | 1469.1103 | 1473.4798 |
| Frequencies -- | 1480.5721 | 1480.7771 | 1490.8783 |
| Frequencies -- | 1492.2489 | 1497.5975 | 1500.1906 |
| Frequencies -- | 1503.4796 | 1506.6341 | 1508.6724 |
| Frequencies -- | 1509.6797 | 1516.2646 | 1522.1922 |
| Frequencies -- | 1579.5151 | 1589.9514 | 1593.8837 |
| Frequencies -- | 1595.6105 | 1595.8709 | 1611.9603 |
| Frequencies -- | 1617.2757 | 1618.8251 | 1623.7348 |
| Frequencies -- | 1631.6134 | 2998.5363 | 3010.0735 |
| Frequencies -- | 3010.8362 | 3011.6466 | 3013.2744 |
| Frequencies -- | 3015.5894 | 3099.8685 | 3104.8050 |
| Frequencies -- | 3105.4640 | 3107.0136 | 3108.8243 |
| Frequencies -- | 3137.2306 | 3146.9407 | 3152.1315 |
| Frequencies -- | 3154.0272 | 3154.3631 | 3159.7615 |
| Frequencies -- | 3163.5792 | 3164.9055 | 3167.1551 |
| Frequencies -- | 3175.5027 | 3178.9792 | 3190.6517 |
| Frequencies -- | 3195.4133 | 3208.1836 | 3227.2347 |

**proximal conformation**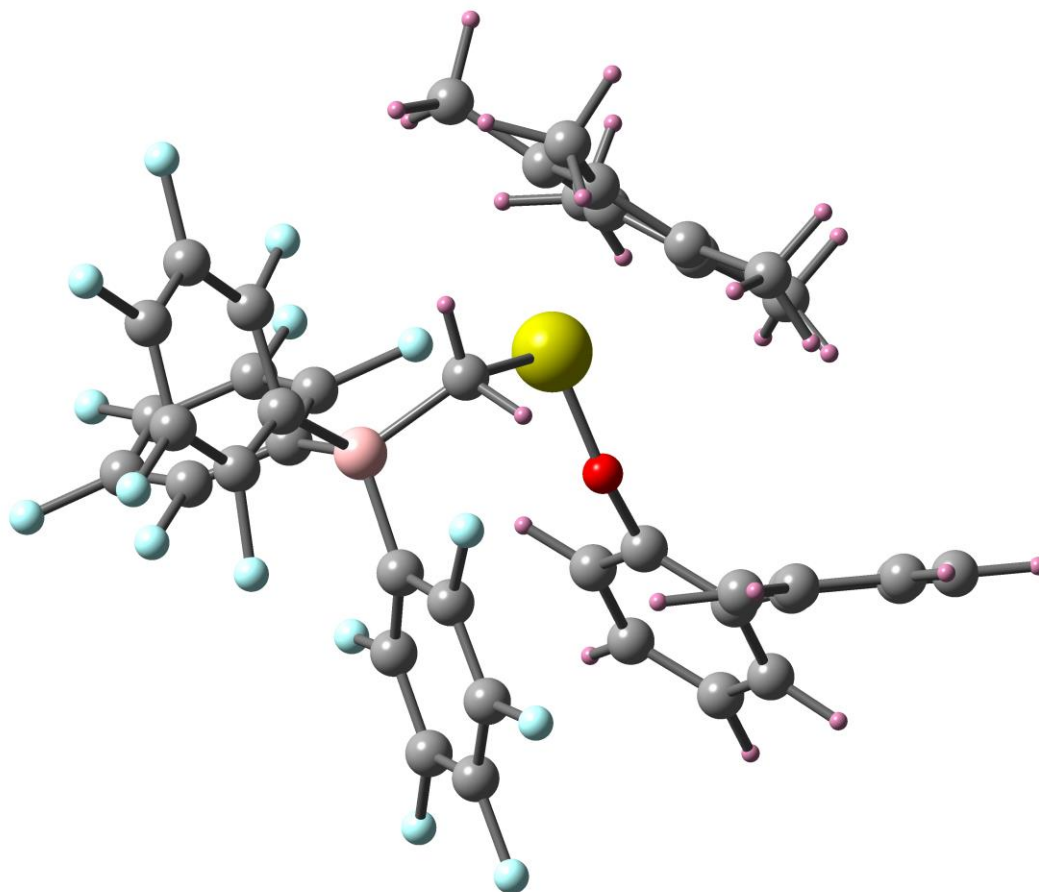

| <b>vacuum</b> | <b>toluene-like solvent</b> | <b>D3 dispersion</b> |
|---------------|-----------------------------|----------------------|
| -3232.8680086 | -3232.8792944               | -0.60807657          |

|    |             |             |             |
|----|-------------|-------------|-------------|
| Ti | 1.13573000  | -1.57909000 | -0.64514800 |
| O  | 2.26514900  | -0.59052600 | 0.34059800  |
| C  | 3.25203500  | -0.29410900 | 1.27805400  |
| C  | 3.08828500  | -0.83883000 | 2.57687600  |
| C  | 4.38684400  | 0.51156300  | 0.95347000  |
| C  | 4.04947300  | -0.60799800 | 3.57638400  |
| C  | 5.34253900  | 0.71562900  | 1.98701000  |
| C  | 5.18893000  | 0.17016900  | 3.27591600  |
| H  | 3.90437200  | -1.02200700 | 4.57603200  |
| H  | 6.20620900  | 1.34739600  | 1.77529800  |
| H  | 5.93985800  | 0.36797000  | 4.04273900  |
| C  | 0.58487800  | -3.69329300 | -1.79093000 |
| C  | 0.85281200  | -2.71232200 | -2.80649200 |
| C  | 1.79678600  | -3.87740600 | -1.00503500 |
| C  | 2.22465700  | -2.26078700 | -2.63182600 |
| C  | 2.82005600  | -3.02142800 | -1.54809600 |
| F  | -3.19701900 | -3.02892100 | 4.49607500  |
| C  | -2.74882000 | -2.23791000 | 3.45132600  |
| C  | -3.33841700 | -0.98637500 | 3.18775700  |

|   |             |             |             |
|---|-------------|-------------|-------------|
| C | -1.69072400 | -2.66363100 | 2.63520700  |
| C | -2.86999200 | -0.20219100 | 2.11751500  |
| F | -4.37105800 | -0.53758200 | 3.99703900  |
| C | -1.28613100 | -1.81751400 | 1.58928800  |
| F | -1.06584700 | -3.88668000 | 2.85935300  |
| C | -1.81632800 | -0.57626900 | 1.24059000  |
| F | -3.48297300 | 1.03995300  | 1.96432300  |
| F | -0.15990900 | -2.37083700 | 0.84789800  |
| B | -1.37149800 | 0.39131300  | -0.06482600 |
| C | -2.83955700 | 0.66296900  | -0.84934500 |
| C | -0.60879500 | 1.77986600  | 0.44372400  |
| C | -0.35985200 | -0.33822700 | -1.22480800 |
| C | -3.54000400 | 1.88834100  | -0.96617200 |
| C | -3.52362700 | -0.41512500 | -1.46109800 |
| C | -0.14496100 | 2.05174400  | 1.75035100  |
| C | -0.29626700 | 2.81554100  | -0.47231900 |
| H | -0.96909400 | -0.80102500 | -2.00557000 |
| H | 0.23898300  | 0.46022800  | -1.70812800 |
| C | -4.75125700 | 2.04835800  | -1.67130600 |
| F | -3.07890700 | 3.04453000  | -0.33242400 |
| C | -4.73446700 | -0.31388800 | -2.16938200 |
| F | -3.00452000 | -1.72436900 | -1.35627200 |
| C | 0.50671800  | 3.24071200  | 2.14058000  |
| F | -0.29040700 | 1.10496500  | 2.77954300  |
| C | 0.34941300  | 4.01830000  | -0.13917400 |
| F | -0.64733900 | 2.67808200  | -1.82562000 |
| C | -5.35395900 | 0.94058700  | -2.28869400 |
| F | -5.36589700 | 3.29281000  | -1.74737600 |
| F | -5.32102200 | -1.43856600 | -2.74464600 |
| C | 0.74992900  | 4.24249100  | 1.18903900  |
| F | 0.92257200  | 3.42133800  | 3.45512900  |
| F | 0.61029900  | 4.97917600  | -1.11184000 |
| F | -6.54465200 | 1.07747500  | -2.98790100 |
| F | 1.39434300  | 5.41845900  | 1.54496700  |
| C | 2.95602100  | -1.31984400 | -3.56280100 |
| H | 3.77717700  | -0.78683700 | -3.06936500 |
| H | 3.39230200  | -1.89297800 | -4.39991800 |
| H | 2.28784600  | -0.56657300 | -4.00182800 |
| C | -0.05260500 | -2.34251500 | -3.95658500 |
| H | 0.03467000  | -1.28446300 | -4.23951100 |
| H | 0.21360000  | -2.94020800 | -4.84567700 |
| H | -1.10807200 | -2.54358200 | -3.73428000 |
| C | -0.69437700 | -4.48109200 | -1.62807600 |
| H | -1.58296800 | -3.89737100 | -1.89745200 |
| H | -0.67199900 | -5.36798000 | -2.28556200 |
| H | -0.83067900 | -4.84638500 | -0.60178800 |
| C | 1.97701000  | -4.87480400 | 0.11834300  |
| H | 1.07315000  | -4.98725300 | 0.73235800  |
| H | 2.21104200  | -5.87057800 | -0.29685000 |
| H | 2.80514300  | -4.60160800 | 0.78674700  |
| C | 4.27368000  | -2.99931200 | -1.13738300 |
| H | 4.76568200  | -2.05621800 | -1.40197500 |
| H | 4.41154200  | -3.15749800 | -0.05888800 |
| H | 4.81520900  | -3.80922300 | -1.65682500 |
| H | 2.19863400  | -1.43060800 | 2.79355100  |
| C | 4.61644400  | 1.15264900  | -0.38121400 |
| C | 5.89016100  | 1.06685200  | -1.00748700 |

|   |            |            |             |
|---|------------|------------|-------------|
| C | 3.61214700 | 1.92727800 | -1.01918400 |
| C | 6.14924200 | 1.73117200 | -2.22487000 |
| H | 6.67991800 | 0.47168800 | -0.54431800 |
| C | 3.87043300 | 2.60146500 | -2.23053500 |
| H | 2.63772900 | 2.02703800 | -0.54825100 |
| C | 5.14068100 | 2.50506900 | -2.84084200 |
| H | 7.13603600 | 1.64906300 | -2.68660500 |
| H | 3.08715600 | 3.21155500 | -2.68599300 |
| H | 5.34360400 | 3.03123500 | -3.77622200 |

|                |           |           |           |
|----------------|-----------|-----------|-----------|
| Frequencies -- | 8.2249    | 18.0542   | 24.5933   |
| Frequencies -- | 25.5349   | 27.3079   | 28.1580   |
| Frequencies -- | 32.5557   | 34.3201   | 39.5124   |
| Frequencies -- | 42.0160   | 46.1970   | 52.8687   |
| Frequencies -- | 56.8972   | 60.7206   | 80.8441   |
| Frequencies -- | 90.5625   | 92.1611   | 96.6228   |
| Frequencies -- | 102.7690  | 107.0756  | 110.0866  |
| Frequencies -- | 113.1288  | 115.2050  | 120.7904  |
| Frequencies -- | 123.7462  | 125.2311  | 131.1472  |
| Frequencies -- | 133.4714  | 135.4433  | 139.5939  |
| Frequencies -- | 142.4862  | 144.5729  | 148.3808  |
| Frequencies -- | 156.6721  | 158.3198  | 160.2032  |
| Frequencies -- | 163.8172  | 165.2551  | 169.4724  |
| Frequencies -- | 169.9210  | 197.3869  | 213.0803  |
| Frequencies -- | 217.3222  | 217.9446  | 224.4571  |
| Frequencies -- | 240.8659  | 249.7952  | 264.0025  |
| Frequencies -- | 264.5383  | 265.1956  | 275.2400  |
| Frequencies -- | 277.3049  | 278.8071  | 281.3837  |
| Frequencies -- | 290.1349  | 293.6505  | 297.6055  |
| Frequencies -- | 300.5366  | 302.4219  | 305.4908  |
| Frequencies -- | 307.1372  | 310.3748  | 321.4823  |
| Frequencies -- | 325.7609  | 330.5917  | 337.2695  |
| Frequencies -- | 351.0731  | 361.1529  | 363.8949  |
| Frequencies -- | 374.3555  | 377.1759  | 380.4454  |
| Frequencies -- | 382.2924  | 388.4558  | 398.5569  |
| Frequencies -- | 405.3280  | 407.9573  | 410.6185  |
| Frequencies -- | 431.2106  | 432.4880  | 443.5637  |
| Frequencies -- | 451.8229  | 458.6622  | 462.1165  |
| Frequencies -- | 467.2024  | 498.6599  | 511.1368  |
| Frequencies -- | 533.5651  | 535.8763  | 538.2094  |
| Frequencies -- | 540.0177  | 542.2767  | 548.2017  |
| Frequencies -- | 557.0092  | 563.7956  | 564.3080  |
| Frequencies -- | 581.1167  | 588.4834  | 599.6902  |
| Frequencies -- | 602.1204  | 609.3661  | 614.1574  |
| Frequencies -- | 622.7113  | 624.4410  | 633.9651  |
| Frequencies -- | 635.7590  | 642.1688  | 653.0795  |
| Frequencies -- | 660.6400  | 671.7397  | 704.8266  |
| Frequencies -- | 710.9348  | 717.8136  | 729.5085  |
| Frequencies -- | 734.6349  | 735.1968  | 741.4659  |
| Frequencies -- | 744.5594  | 748.0108  | 765.3909  |
| Frequencies -- | 767.4166  | 781.5412  | 801.2008  |
| Frequencies -- | 805.2161  | 820.8201  | 839.7670  |
| Frequencies -- | 859.5663  | 863.2098  | 874.2267  |
| Frequencies -- | 876.6432  | 905.5196  | 910.6115  |
| Frequencies -- | 914.7821  | 936.0227  | 962.0470  |
| Frequencies -- | 967.2608  | 970.7831  | 972.7324  |
| Frequencies -- | 989.1974  | 994.3289  | 1000.0763 |
| Frequencies -- | 1004.7881 | 1008.7491 | 1022.0463 |
| Frequencies -- | 1031.7607 | 1035.5492 | 1040.7383 |
| Frequencies -- | 1043.0456 | 1044.0366 | 1045.1818 |
| Frequencies -- | 1047.7123 | 1047.7769 | 1049.0876 |
| Frequencies -- | 1050.2459 | 1055.8371 | 1063.0469 |

|                |           |           |           |
|----------------|-----------|-----------|-----------|
| Frequencies -- | 1086.8904 | 1088.4654 | 1091.6126 |
| Frequencies -- | 1092.1877 | 1126.3753 | 1127.5175 |
| Frequencies -- | 1173.1157 | 1175.2979 | 1185.7761 |
| Frequencies -- | 1187.2239 | 1202.8326 | 1209.2744 |
| Frequencies -- | 1209.5297 | 1214.0356 | 1220.0517 |
| Frequencies -- | 1265.1637 | 1295.5767 | 1299.6597 |
| Frequencies -- | 1314.2933 | 1320.8372 | 1336.9339 |
| Frequencies -- | 1338.3172 | 1344.2110 | 1349.3894 |
| Frequencies -- | 1358.4123 | 1371.8576 | 1386.4126 |
| Frequencies -- | 1410.6555 | 1412.6591 | 1414.0377 |
| Frequencies -- | 1416.0691 | 1420.6234 | 1425.3112 |
| Frequencies -- | 1427.3105 | 1428.1025 | 1429.8250 |
| Frequencies -- | 1434.0965 | 1435.5570 | 1446.9292 |
| Frequencies -- | 1454.0435 | 1454.6041 | 1464.3380 |
| Frequencies -- | 1466.9159 | 1469.3991 | 1472.2458 |
| Frequencies -- | 1480.7962 | 1481.2143 | 1492.9792 |
| Frequencies -- | 1493.9433 | 1498.2886 | 1501.1289 |
| Frequencies -- | 1505.7188 | 1507.5489 | 1509.7912 |
| Frequencies -- | 1511.3451 | 1517.8666 | 1522.6804 |
| Frequencies -- | 1579.9254 | 1591.6289 | 1593.5036 |
| Frequencies -- | 1596.0463 | 1596.9678 | 1612.8688 |
| Frequencies -- | 1617.0855 | 1620.3223 | 1623.4626 |
| Frequencies -- | 1630.9176 | 2990.1346 | 3009.7529 |
| Frequencies -- | 3010.2550 | 3011.5773 | 3012.0947 |
| Frequencies -- | 3013.2612 | 3099.6913 | 3100.3727 |
| Frequencies -- | 3103.1072 | 3106.2701 | 3108.9599 |
| Frequencies -- | 3137.5490 | 3144.6887 | 3152.8835 |
| Frequencies -- | 3156.0506 | 3157.1995 | 3159.4279 |
| Frequencies -- | 3162.6744 | 3165.9143 | 3169.3811 |
| Frequencies -- | 3177.5053 | 3181.3689 | 3192.2177 |
| Frequencies -- | 3195.1570 | 3206.3334 | 3238.1189 |



**Catalyst 22:**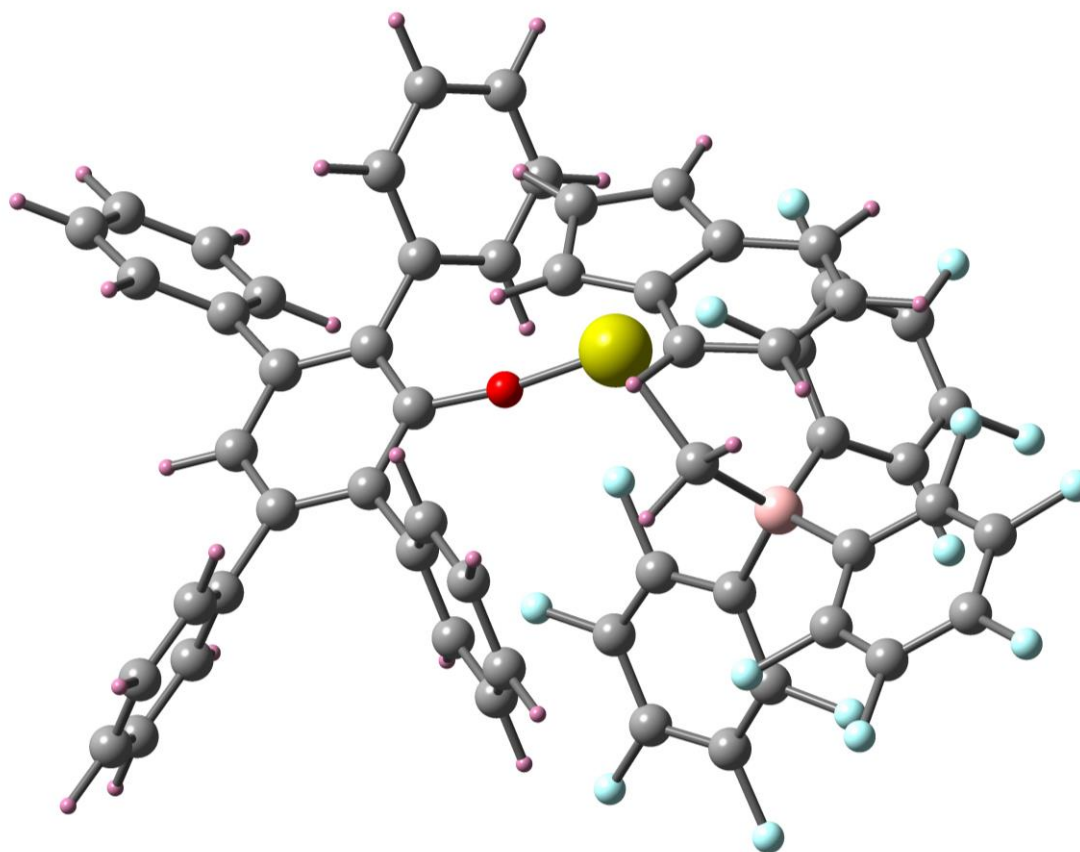

| vacuum        | toluene-like solvent | D3 dispersion |
|---------------|----------------------|---------------|
| -3882.7940082 | -3882.8106902        | -0.81442337   |

|    |             |             |             |
|----|-------------|-------------|-------------|
| Ti | 0.01170100  | -0.94427200 | -1.53185200 |
| O  | -1.54693300 | -0.29183800 | -1.00688300 |
| C  | -2.84751900 | 0.08876800  | -0.69374000 |
| C  | -3.14938700 | 1.48438100  | -0.66801800 |
| C  | -3.80754500 | -0.92887400 | -0.40030300 |
| C  | -4.46878600 | 1.87223100  | -0.29016700 |
| C  | -5.11689800 | -0.51459800 | -0.01385900 |
| C  | -5.40915500 | 0.86796300  | 0.03589000  |
| H  | -6.40927200 | 1.17436900  | 0.33929000  |
| C  | -0.41953400 | -0.82447900 | -3.78414400 |
| C  | 1.01969000  | -0.68429100 | -3.99453900 |
| C  | -0.66510700 | -2.19264700 | -3.38992500 |
| C  | 1.64573800  | -1.92186700 | -3.55959400 |
| C  | 0.58569700  | -2.82681100 | -3.14882500 |
| F  | 3.27954200  | -5.45791000 | 2.63623500  |
| C  | 3.08772700  | -4.18140800 | 2.13234400  |
| C  | 3.88449000  | -3.10567200 | 2.56887000  |
| C  | 2.08848800  | -3.93362400 | 1.17928600  |
| C  | 3.67019400  | -1.82036200 | 2.03990400  |
| F  | 4.87240900  | -3.32894100 | 3.51641200  |
| C  | 1.93709900  | -2.61957200 | 0.70065400  |
| F  | 1.27382500  | -4.96813700 | 0.72874300  |

|   |             |             |             |
|---|-------------|-------------|-------------|
| C | 2.69512000  | -1.50294200 | 1.05754600  |
| F | 4.49721200  | -0.81304000 | 2.53216900  |
| F | 0.85290500  | -2.50053500 | -0.25266100 |
| B | 2.45518500  | 0.07108200  | 0.53412800  |
| C | 1.80052500  | 0.78630700  | 1.89861800  |
| C | 3.85347200  | 0.79227800  | -0.01061800 |
| C | 1.48308700  | 0.27841000  | -0.85125700 |
| C | 2.45034300  | 1.66873000  | 2.79694100  |
| C | 0.49038200  | 0.45954100  | 2.31052500  |
| C | 4.98484600  | 0.10399400  | -0.50173000 |
| C | 3.92690700  | 2.19227700  | -0.21788300 |
| H | 0.97379300  | 1.25494200  | -0.75666900 |
| H | 2.16149200  | 0.33937900  | -1.71571600 |
| C | 1.83989700  | 2.22445000  | 3.94166200  |
| F | 3.78135400  | 2.04178300  | 2.60824700  |
| C | -0.16930000 | 0.98453800  | 3.43544300  |
| F | -0.24382700 | -0.49493800 | 1.57866700  |
| C | 6.10995800  | 0.72441600  | -1.08071300 |
| F | 5.03454900  | -1.30134600 | -0.47690400 |
| C | 5.02516700  | 2.86220900  | -0.78384300 |
| F | 2.83601700  | 3.00413300  | 0.12353100  |
| C | 0.51353400  | 1.89100800  | 4.26220900  |
| F | 2.54238200  | 3.09838400  | 4.76285800  |
| F | -1.47723700 | 0.61057900  | 3.73692100  |
| C | 6.13899800  | 2.12091000  | -1.21546900 |
| F | 7.18039700  | -0.03777300 | -1.54252000 |
| F | 5.01441400  | 4.24527200  | -0.93840900 |
| F | -0.10541000 | 2.43309800  | 5.37991900  |
| F | 7.23379900  | 2.75581200  | -1.78788600 |
| C | -4.92062800 | 3.30580900  | -0.20329700 |
| C | -4.93879900 | 4.15842900  | -1.33711200 |
| C | -5.40688000 | 3.81639500  | 1.02910400  |
| C | -5.42298100 | 5.47968100  | -1.24117500 |
| H | -4.58561000 | 3.78738000  | -2.29961900 |
| C | -5.88395600 | 5.14034000  | 1.12965000  |
| H | -5.39699000 | 3.17962400  | 1.91631600  |
| C | -5.89457400 | 5.97840200  | -0.00677000 |
| H | -5.43239600 | 6.11695100  | -2.12864500 |
| H | -6.24258400 | 5.51465900  | 2.09135100  |
| H | -6.26467800 | 7.00350700  | 0.06798800  |
| C | -6.21413000 | -1.47357900 | 0.36200000  |
| C | -7.46004700 | -1.42743400 | -0.31774700 |
| C | -6.06865100 | -2.39275600 | 1.43341000  |
| C | -8.52160300 | -2.28114300 | 0.04936700  |
| H | -7.59520000 | -0.72870500 | -1.14631000 |
| C | -7.13075500 | -3.24179200 | 1.80758700  |
| H | -5.13015800 | -2.43440200 | 1.98708000  |
| C | -8.36108900 | -3.19352400 | 1.11522100  |
| H | -9.46808900 | -2.23334100 | -0.49442600 |
| H | -6.99800100 | -3.93551800 | 2.64110100  |
| H | -9.18215500 | -3.85357600 | 1.40430900  |
| C | -2.09688900 | 2.50833900  | -1.00070800 |
| C | -1.71772800 | 2.75689100  | -2.34407400 |
| C | -1.48943000 | 3.27704300  | 0.02364500  |
| C | -0.76234800 | 3.74735400  | -2.65689000 |
| H | -2.19268100 | 2.19291300  | -3.15032500 |
| C | -0.52880300 | 4.26265500  | -0.28449300 |

|   |             |             |             |
|---|-------------|-------------|-------------|
| H | -1.77475200 | 3.10746900  | 1.06334600  |
| C | -0.16115600 | 4.50233200  | -1.62636200 |
| H | -0.49433900 | 3.93388100  | -3.69999400 |
| H | -0.06575300 | 4.83870600  | 0.51931300  |
| H | 0.58430100  | 5.26433300  | -1.86264100 |
| C | -3.46349600 | -2.38610800 | -0.55304300 |
| C | -4.07048200 | -3.14975100 | -1.58470700 |
| C | -2.56614900 | -3.04022000 | 0.32948500  |
| C | -3.79281500 | -4.52527300 | -1.72936500 |
| H | -4.77352400 | -2.66783200 | -2.26650700 |
| C | -2.28972300 | -4.41797500 | 0.18998400  |
| H | -2.10688400 | -2.47800000 | 1.14351000  |
| C | -2.90099400 | -5.16551200 | -0.84021200 |
| H | -4.27844100 | -5.09503300 | -2.52510900 |
| H | -1.60243000 | -4.90419400 | 0.88455200  |
| H | -2.69051800 | -6.23223300 | -0.94402400 |
| H | -1.17500500 | -0.11878200 | -4.11560700 |
| H | -1.64084100 | -2.64013100 | -3.23037700 |
| H | 0.72240100  | -3.84192400 | -2.78567900 |
| C | 1.81599300  | 0.37622000  | -4.50686000 |
| H | 1.35627500  | 1.30599700  | -4.84614300 |
| C | 3.20411500  | 0.19621800  | -4.57971700 |
| H | 3.83296100  | 0.99055500  | -4.98762900 |
| C | 3.82370500  | -1.01408800 | -4.12964200 |
| H | 4.90881400  | -1.11220100 | -4.19731300 |
| C | 3.06062700  | -2.06938900 | -3.61404300 |
| H | 3.54063800  | -2.99049600 | -3.27916200 |

|                |          |          |          |
|----------------|----------|----------|----------|
| Frequencies -- | 8.0991   | 11.8464  | 14.9317  |
| Frequencies -- | 16.7111  | 22.9713  | 23.3801  |
| Frequencies -- | 28.0066  | 31.4905  | 32.8850  |
| Frequencies -- | 35.4565  | 39.6285  | 40.2160  |
| Frequencies -- | 44.5915  | 46.8692  | 47.9384  |
| Frequencies -- | 51.1782  | 53.6222  | 55.4107  |
| Frequencies -- | 61.3444  | 62.8343  | 64.4137  |
| Frequencies -- | 68.5093  | 71.2203  | 73.7895  |
| Frequencies -- | 79.1921  | 103.4554 | 105.6995 |
| Frequencies -- | 113.4453 | 118.3292 | 120.8991 |
| Frequencies -- | 126.2256 | 126.8624 | 131.1973 |
| Frequencies -- | 133.4971 | 138.0373 | 143.7890 |
| Frequencies -- | 146.7896 | 149.8650 | 158.7025 |
| Frequencies -- | 158.7959 | 165.2806 | 174.0674 |
| Frequencies -- | 190.1961 | 192.8468 | 195.5633 |
| Frequencies -- | 206.9515 | 212.4672 | 213.2535 |
| Frequencies -- | 223.0155 | 224.7451 | 230.9336 |
| Frequencies -- | 233.9288 | 245.2573 | 255.0405 |
| Frequencies -- | 261.0693 | 263.7145 | 263.9913 |
| Frequencies -- | 264.2908 | 272.6562 | 273.8881 |
| Frequencies -- | 276.2090 | 279.4978 | 281.5214 |
| Frequencies -- | 300.7482 | 303.2459 | 307.7259 |
| Frequencies -- | 313.2182 | 324.4026 | 326.6187 |
| Frequencies -- | 330.0453 | 333.7212 | 346.9258 |
| Frequencies -- | 357.8228 | 363.1201 | 374.6593 |
| Frequencies -- | 375.8270 | 379.7070 | 386.8496 |
| Frequencies -- | 390.3529 | 402.6926 | 403.7521 |
| Frequencies -- | 406.0001 | 407.2916 | 409.4676 |
| Frequencies -- | 412.1576 | 414.1736 | 431.1434 |
| Frequencies -- | 433.3804 | 435.1219 | 437.9087 |
| Frequencies -- | 441.4695 | 452.6341 | 458.1130 |
| Frequencies -- | 467.3909 | 490.4604 | 507.6517 |

|                |           |           |           |
|----------------|-----------|-----------|-----------|
| Frequencies -- | 519.5664  | 529.6534  | 539.4583  |
| Frequencies -- | 541.3136  | 542.6550  | 545.8154  |
| Frequencies -- | 547.6087  | 549.5999  | 552.7470  |
| Frequencies -- | 559.6755  | 572.1753  | 593.0671  |
| Frequencies -- | 599.7295  | 606.9000  | 612.6301  |
| Frequencies -- | 616.3812  | 616.9955  | 619.3738  |
| Frequencies -- | 624.2486  | 624.9620  | 631.4996  |
| Frequencies -- | 632.7035  | 636.8891  | 642.4856  |
| Frequencies -- | 643.0039  | 653.8174  | 658.8015  |
| Frequencies -- | 674.8659  | 689.0662  | 695.4485  |
| Frequencies -- | 707.5950  | 709.5166  | 710.9284  |
| Frequencies -- | 713.1406  | 714.2200  | 716.7180  |
| Frequencies -- | 726.1484  | 735.0907  | 735.9649  |
| Frequencies -- | 738.0805  | 744.3092  | 744.7086  |
| Frequencies -- | 747.5976  | 750.8110  | 765.8201  |
| Frequencies -- | 770.0789  | 774.2742  | 775.4409  |
| Frequencies -- | 778.9061  | 792.6284  | 795.6438  |
| Frequencies -- | 806.6652  | 821.8509  | 832.3562  |
| Frequencies -- | 839.7574  | 858.7607  | 859.9989  |
| Frequencies -- | 860.5028  | 864.8538  | 867.3291  |
| Frequencies -- | 869.4459  | 873.8696  | 880.6469  |
| Frequencies -- | 881.0683  | 889.7471  | 894.1121  |
| Frequencies -- | 906.7121  | 914.5344  | 916.3079  |
| Frequencies -- | 932.5609  | 939.5598  | 942.1915  |
| Frequencies -- | 945.2728  | 970.0420  | 972.3598  |
| Frequencies -- | 983.8843  | 985.3758  | 987.1060  |
| Frequencies -- | 991.0726  | 994.9394  | 995.7371  |
| Frequencies -- | 1005.2238 | 1005.7621 | 1008.3999 |
| Frequencies -- | 1009.0209 | 1009.8310 | 1012.5523 |
| Frequencies -- | 1014.0873 | 1016.1246 | 1020.1558 |
| Frequencies -- | 1025.8999 | 1030.5588 | 1030.9642 |
| Frequencies -- | 1037.3218 | 1044.4230 | 1045.3377 |
| Frequencies -- | 1050.6389 | 1052.2446 | 1052.7773 |
| Frequencies -- | 1053.7341 | 1054.9002 | 1055.9216 |
| Frequencies -- | 1075.8124 | 1089.1530 | 1089.7103 |
| Frequencies -- | 1091.7624 | 1092.6917 | 1092.9477 |
| Frequencies -- | 1129.3486 | 1137.2411 | 1138.1144 |
| Frequencies -- | 1183.1764 | 1183.3224 | 1183.6141 |
| Frequencies -- | 1185.2400 | 1185.8865 | 1201.8079 |
| Frequencies -- | 1203.7630 | 1204.1448 | 1206.1744 |
| Frequencies -- | 1206.8279 | 1209.6662 | 1211.2838 |
| Frequencies -- | 1214.0160 | 1235.0757 | 1240.8162 |
| Frequencies -- | 1263.2120 | 1266.0388 | 1282.8128 |
| Frequencies -- | 1300.5027 | 1308.1228 | 1321.9908 |
| Frequencies -- | 1322.7549 | 1325.0250 | 1327.3203 |
| Frequencies -- | 1331.7725 | 1332.7576 | 1336.1418 |
| Frequencies -- | 1339.0984 | 1346.0129 | 1352.1181 |
| Frequencies -- | 1355.1358 | 1367.5136 | 1368.4602 |
| Frequencies -- | 1369.6340 | 1369.8481 | 1371.2326 |
| Frequencies -- | 1380.4684 | 1382.0111 | 1410.1018 |
| Frequencies -- | 1416.1754 | 1418.8869 | 1422.9087 |
| Frequencies -- | 1425.1535 | 1442.5177 | 1443.7107 |
| Frequencies -- | 1445.5151 | 1447.3015 | 1460.2865 |
| Frequencies -- | 1465.6229 | 1466.5589 | 1467.7870 |
| Frequencies -- | 1470.6465 | 1496.6910 | 1497.0265 |
| Frequencies -- | 1497.8981 | 1502.4941 | 1510.8804 |
| Frequencies -- | 1532.0057 | 1568.3846 | 1589.6014 |
| Frequencies -- | 1591.8777 | 1594.0398 | 1594.2929 |
| Frequencies -- | 1595.3885 | 1596.2422 | 1597.4877 |
| Frequencies -- | 1599.8744 | 1618.5586 | 1619.8333 |
| Frequencies -- | 1622.1413 | 1624.1640 | 1624.5066 |
| Frequencies -- | 1624.8006 | 1626.6579 | 1627.5018 |
| Frequencies -- | 3013.4970 | 3103.8311 | 3149.3906 |

|                |           |           |           |
|----------------|-----------|-----------|-----------|
| Frequencies -- | 3153.1630 | 3154.4585 | 3158.0532 |
| Frequencies -- | 3160.7813 | 3161.6946 | 3163.8665 |
| Frequencies -- | 3166.7075 | 3170.6026 | 3171.7307 |
| Frequencies -- | 3173.5280 | 3174.7089 | 3175.3759 |
| Frequencies -- | 3181.7061 | 3181.9634 | 3186.3105 |
| Frequencies -- | 3186.8781 | 3187.3142 | 3188.3963 |
| Frequencies -- | 3194.5790 | 3197.3815 | 3197.9488 |
| Frequencies -- | 3198.3651 | 3200.2899 | 3203.3426 |
| Frequencies -- | 3237.8185 | 3244.4625 | 3269.9128 |

**Catalyst 23:**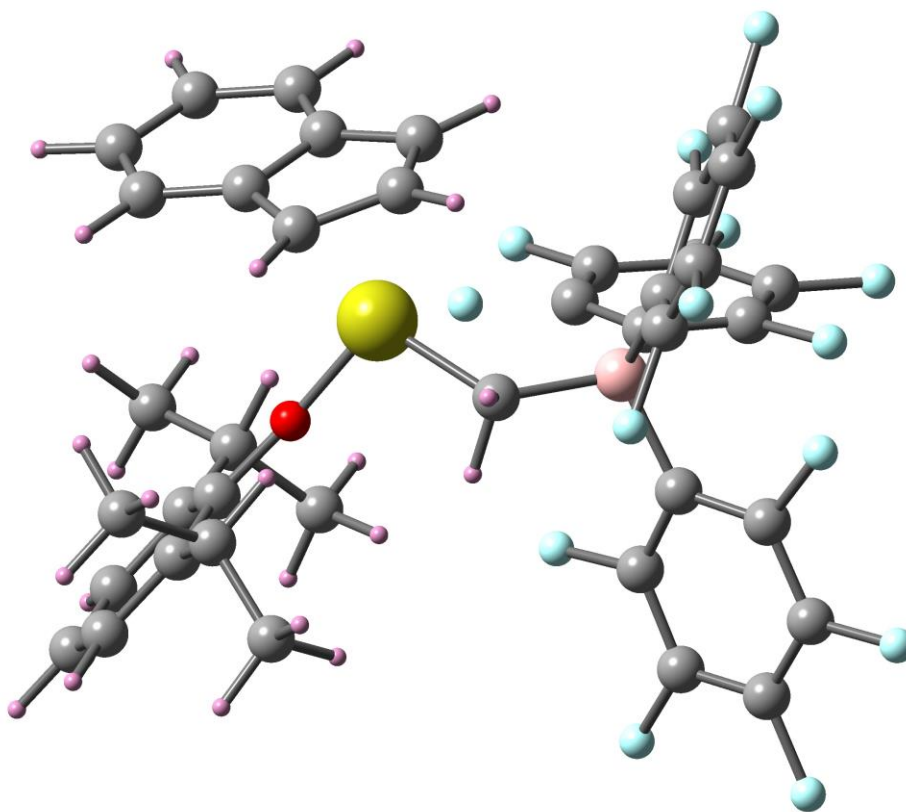

| vacuum        | toluene-like solvent | D3 dispersion |
|---------------|----------------------|---------------|
| -3194.7573902 | -3194.7691216        | -0.59407411   |

|    |             |             |             |
|----|-------------|-------------|-------------|
| Ti | -1.53136300 | -0.96954400 | -0.43639800 |
| O  | -2.86425600 | 0.19287800  | -0.58778300 |
| C  | -3.95956900 | 1.04196100  | -0.75654600 |
| C  | -4.20162000 | 1.60207200  | -2.04878300 |
| C  | -4.76936800 | 1.33959000  | 0.38448500  |
| C  | -5.30371300 | 2.48067300  | -2.17372500 |
| C  | -5.85035200 | 2.23000300  | 0.19110500  |
| C  | -6.12076900 | 2.79302700  | -1.07126500 |
| H  | -5.51968900 | 2.93128000  | -3.14306900 |
| H  | -6.48739500 | 2.48907900  | 1.03673600  |
| H  | -6.96254800 | 3.47758500  | -1.19307300 |
| H  | 0.34677100  | -2.63635600 | -2.23435800 |
| C  | -0.55815500 | -2.79963600 | -1.66236100 |
| C  | -0.62361600 | -3.26622700 | -0.31922700 |
| C  | -1.89684300 | -2.50929600 | -2.12047600 |
| H  | 0.22273900  | -3.52739400 | 0.30788200  |
| C  | -2.02456200 | -3.41554600 | 0.03918400  |
| H  | -2.16983000 | -2.18861200 | -3.12186100 |
| C  | -2.82325200 | -2.97430000 | -1.09808100 |
| F  | 3.18669500  | 5.88733900  | -0.03013600 |
| C  | 2.83189900  | 4.54636900  | -0.03876700 |
| C  | 3.72814500  | 3.56956400  | -0.50169600 |
| C  | 1.57371100  | 4.13654700  | 0.43210600  |

|   |             |             |             |
|---|-------------|-------------|-------------|
| C | 3.34799000  | 2.21125200  | -0.50437800 |
| F | 4.99011900  | 3.95084700  | -0.94116500 |
| C | 1.24275700  | 2.76967200  | 0.40262800  |
| F | 0.67516900  | 5.07747900  | 0.92576200  |
| C | 2.08017400  | 1.73720500  | -0.08753800 |
| F | 4.34454600  | 1.32723900  | -0.92423800 |
| F | -0.02135100 | 2.45149800  | 0.94364100  |
| B | 1.54138100  | 0.14114500  | -0.08184600 |
| C | 2.54119100  | -0.92566100 | -0.87917800 |
| C | 1.43940800  | -0.19679900 | 1.56448000  |
| C | 0.08078400  | 0.13496000  | -0.94085600 |
| C | 3.03183600  | -2.15078000 | -0.37564000 |
| C | 2.91423600  | -0.70320900 | -2.22940900 |
| C | 0.30486500  | -0.55994400 | 2.28984300  |
| C | 2.56923300  | -0.04915600 | 2.41340500  |
| H | -0.42034900 | 1.11529600  | -0.86062900 |
| H | 0.31776400  | -0.01531700 | -2.00577000 |
| C | 3.85191300  | -3.04634000 | -1.09384500 |
| F | 2.68484200  | -2.58940300 | 0.91676600  |
| C | 3.72915600  | -1.55846900 | -2.99199600 |
| F | 2.46394600  | 0.44731200  | -2.89500200 |
| C | 0.19952900  | -0.76763500 | 3.67556700  |
| F | -0.96168100 | -0.77993200 | 1.60419100  |
| C | 2.55390400  | -0.23728100 | 3.80750900  |
| F | 3.80397100  | 0.27606700  | 1.85605000  |
| C | 4.21531900  | -2.74483600 | -2.41522800 |
| F | 4.28758800  | -4.23074900 | -0.50932400 |
| F | 4.05641800  | -1.24546200 | -4.30609000 |
| C | 1.35496300  | -0.59803300 | 4.45306000  |
| F | -1.00690100 | -1.12984700 | 4.26331900  |
| F | 3.70946700  | -0.07950200 | 4.55683600  |
| F | 5.01974500  | -3.60807200 | -3.14403400 |
| F | 1.31598300  | -0.78663300 | 5.82424900  |
| C | -3.30923400 | 1.30174500  | -3.26325200 |
| H | -2.53993200 | 0.58244800  | -2.95227300 |
| C | -4.44926500 | 0.77482700  | 1.77715900  |
| H | -3.77581700 | -0.08413100 | 1.64946600  |
| C | -2.55844000 | 2.57645600  | -3.74912900 |
| H | -1.87465300 | 2.32446200  | -4.57562600 |
| H | -3.25586200 | 3.34676900  | -4.11176100 |
| H | -1.96222300 | 3.01893300  | -2.93643500 |
| C | -4.10384900 | 0.63880900  | -4.42584800 |
| H | -4.60991000 | -0.28085800 | -4.09081300 |
| H | -4.87279400 | 1.31172900  | -4.83412800 |
| H | -3.42179800 | 0.37611200  | -5.25073000 |
| C | -3.68814100 | 1.82851400  | 2.63833900  |
| H | -2.77539000 | 2.17710700  | 2.13246800  |
| H | -4.31882500 | 2.70869300  | 2.83790000  |
| H | -3.39765600 | 1.39039900  | 3.60685900  |
| C | -5.70139300 | 0.24033000  | 2.52643500  |
| H | -6.40505000 | 1.04315900  | 2.79407200  |
| H | -6.24446300 | -0.50009900 | 1.91854700  |
| H | -5.39091500 | -0.24795600 | 3.46387200  |
| C | -2.66723800 | -3.87936800 | 1.22727600  |
| H | -2.07849100 | -4.20425900 | 2.08664500  |
| C | -4.06396500 | -3.94306100 | 1.25160300  |
| H | -4.57226200 | -4.32038900 | 2.14125500  |

|                |             |             |             |
|----------------|-------------|-------------|-------------|
| C              | -4.84927800 | -3.52893400 | 0.12366600  |
| H              | -5.93694900 | -3.60660800 | 0.17960200  |
| C              | -4.24848400 | -3.03263700 | -1.03631800 |
| H              | -4.85378100 | -2.71204800 | -1.88579100 |
| Frequencies -- | 9.4477      | 12.7093     | 16.2548     |
| Frequencies -- | 22.2633     | 24.9089     | 28.0500     |
| Frequencies -- | 31.5749     | 33.6423     | 36.5467     |
| Frequencies -- | 41.3024     | 43.1431     | 43.9791     |
| Frequencies -- | 46.7330     | 53.3563     | 59.7681     |
| Frequencies -- | 65.0398     | 76.3927     | 79.6717     |
| Frequencies -- | 105.4149    | 108.8378    | 114.6885    |
| Frequencies -- | 115.8654    | 121.6450    | 124.3726    |
| Frequencies -- | 127.8120    | 134.0434    | 136.3648    |
| Frequencies -- | 142.0400    | 148.1575    | 154.1419    |
| Frequencies -- | 158.3313    | 159.9044    | 163.4619    |
| Frequencies -- | 169.6396    | 177.2133    | 184.6397    |
| Frequencies -- | 207.7863    | 216.0709    | 219.0433    |
| Frequencies -- | 223.5023    | 225.9180    | 232.4676    |
| Frequencies -- | 244.8605    | 252.1705    | 261.0757    |
| Frequencies -- | 262.5888    | 263.8622    | 264.3357    |
| Frequencies -- | 265.2408    | 271.1624    | 273.4553    |
| Frequencies -- | 275.2972    | 278.1491    | 279.6828    |
| Frequencies -- | 291.5095    | 299.5640    | 302.5911    |
| Frequencies -- | 306.1026    | 313.1659    | 314.3185    |
| Frequencies -- | 322.1514    | 328.1293    | 331.7634    |
| Frequencies -- | 338.7372    | 347.2155    | 361.6889    |
| Frequencies -- | 369.7337    | 375.0984    | 377.3827    |
| Frequencies -- | 380.3100    | 392.4166    | 392.6610    |
| Frequencies -- | 408.6119    | 424.7461    | 427.4130    |
| Frequencies -- | 431.0012    | 431.9855    | 434.8248    |
| Frequencies -- | 442.6666    | 444.4796    | 453.1348    |
| Frequencies -- | 458.7194    | 468.2871    | 500.9051    |
| Frequencies -- | 535.7264    | 539.4776    | 541.3837    |
| Frequencies -- | 542.3017    | 542.9583    | 546.0610    |
| Frequencies -- | 548.3855    | 561.9273    | 572.7414    |
| Frequencies -- | 587.5923    | 596.2195    | 598.4851    |
| Frequencies -- | 603.0580    | 613.8305    | 626.0603    |
| Frequencies -- | 627.7410    | 634.6863    | 636.8452    |
| Frequencies -- | 642.3250    | 652.6373    | 672.8304    |
| Frequencies -- | 707.3144    | 717.0602    | 721.4930    |
| Frequencies -- | 723.7461    | 729.7116    | 736.2234    |
| Frequencies -- | 738.4906    | 744.7177    | 748.9354    |
| Frequencies -- | 762.2513    | 766.1199    | 768.5230    |
| Frequencies -- | 794.8115    | 797.4392    | 816.2715    |
| Frequencies -- | 821.5208    | 828.6522    | 843.6515    |
| Frequencies -- | 866.4584    | 866.8836    | 874.3533    |
| Frequencies -- | 876.0781    | 879.6402    | 881.7954    |
| Frequencies -- | 901.2073    | 907.2897    | 912.4558    |
| Frequencies -- | 924.3877    | 928.5743    | 929.5856    |
| Frequencies -- | 938.8162    | 939.7199    | 960.5331    |
| Frequencies -- | 967.0567    | 973.9635    | 977.1246    |
| Frequencies -- | 993.2359    | 1005.6625   | 1006.8415   |
| Frequencies -- | 1012.8519   | 1023.0144   | 1032.8754   |
| Frequencies -- | 1045.1793   | 1049.5399   | 1054.6801   |
| Frequencies -- | 1056.1226   | 1058.6535   | 1073.6722   |
| Frequencies -- | 1078.2612   | 1084.5186   | 1113.7450   |
| Frequencies -- | 1118.1989   | 1121.9138   | 1138.0821   |
| Frequencies -- | 1162.7050   | 1182.0499   | 1184.5677   |
| Frequencies -- | 1197.5715   | 1203.8380   | 1204.9648   |
| Frequencies -- | 1210.4555   | 1210.7148   | 1215.3932   |
| Frequencies -- | 1237.8570   | 1257.0445   | 1268.1603   |
| Frequencies -- | 1276.2590   | 1297.0269   | 1308.2577   |



|                |           |           |           |
|----------------|-----------|-----------|-----------|
| Frequencies -- | 1314.9018 | 1317.7901 | 1319.8101 |
| Frequencies -- | 1324.5190 | 1337.0505 | 1337.7110 |
| Frequencies -- | 1343.6258 | 1349.1823 | 1358.4933 |
| Frequencies -- | 1371.5430 | 1382.9273 | 1390.2461 |
| Frequencies -- | 1399.2862 | 1399.6472 | 1411.6330 |
| Frequencies -- | 1415.7666 | 1416.6284 | 1417.7663 |
| Frequencies -- | 1419.0229 | 1420.9643 | 1428.2489 |
| Frequencies -- | 1437.4717 | 1466.6052 | 1466.6617 |
| Frequencies -- | 1468.6279 | 1471.5230 | 1474.5738 |
| Frequencies -- | 1485.5583 | 1487.2254 | 1488.3820 |
| Frequencies -- | 1490.3672 | 1495.3096 | 1498.4951 |
| Frequencies -- | 1504.4249 | 1505.8630 | 1509.1472 |
| Frequencies -- | 1559.8547 | 1590.2072 | 1592.9384 |
| Frequencies -- | 1595.2424 | 1596.6280 | 1603.8043 |
| Frequencies -- | 1616.6594 | 1619.4955 | 1626.9893 |
| Frequencies -- | 1630.0916 | 3005.4377 | 3008.3937 |
| Frequencies -- | 3011.6654 | 3012.2047 | 3020.6779 |
| Frequencies -- | 3070.9015 | 3072.8778 | 3100.4010 |
| Frequencies -- | 3103.7677 | 3108.1350 | 3112.8699 |
| Frequencies -- | 3115.0888 | 3116.9185 | 3119.5084 |
| Frequencies -- | 3127.6761 | 3128.0885 | 3165.7898 |
| Frequencies -- | 3167.8948 | 3176.0414 | 3186.8112 |
| Frequencies -- | 3188.9381 | 3200.2723 | 3200.8465 |
| Frequencies -- | 3240.8489 | 3257.0223 | 3290.7551 |

**Catalyst 24:**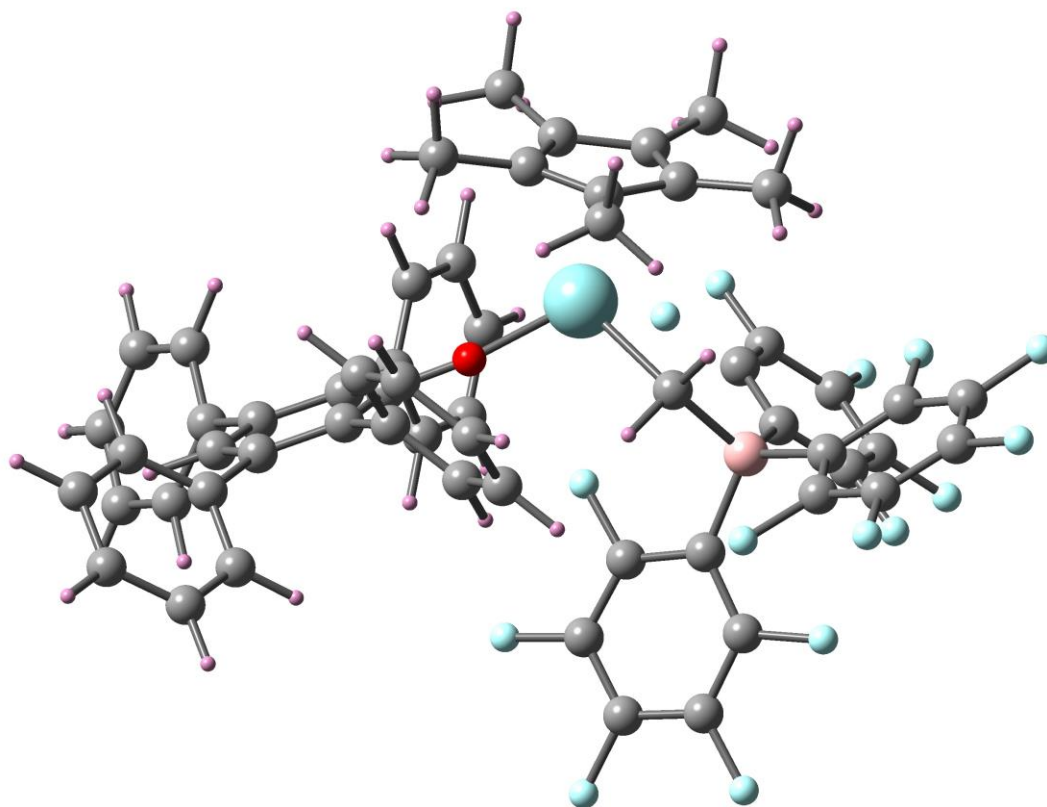

| <b>vacuum</b> | <b>toluene-like solvent</b> | <b>D3 dispersion</b> |
|---------------|-----------------------------|----------------------|
| -3914.1756929 | -3914.1899681               | -0.85037141          |

|   |             |             |             |
|---|-------------|-------------|-------------|
| O | -1.62064500 | 0.04193200  | -0.90655800 |
| C | -2.92091500 | 0.17872600  | -0.43195900 |
| C | -3.48301900 | 1.48764800  | -0.29773300 |
| C | -3.63623300 | -1.00727100 | -0.07050900 |
| C | -4.82894000 | 1.59378100  | 0.17018300  |
| C | -4.98491800 | -0.87576800 | 0.37324100  |
| C | -5.54989900 | 0.41602800  | 0.46915500  |
| H | -6.57841600 | 0.50914400  | 0.81501700  |
| C | 0.55923600  | 0.92340900  | -3.82076300 |
| C | 1.67341900  | -0.00102600 | -3.78011300 |
| C | -0.65465200 | 0.15667300  | -4.05653600 |
| C | 1.15059100  | -1.33452200 | -3.93777800 |
| C | -0.28505500 | -1.23763700 | -4.12739000 |
| F | 0.10338500  | 0.65079500  | 5.92086300  |
| C | 0.72801500  | 0.55712900  | 4.68515600  |
| C | 2.01269300  | 1.08972700  | 4.48628400  |
| C | 0.09260200  | -0.08536800 | 3.60988900  |
| C | 2.63296100  | 0.98695000  | 3.22241400  |
| F | 2.66442700  | 1.71156700  | 5.54436200  |
| C | 0.75825800  | -0.15754700 | 2.37373500  |
| F | -1.17206000 | -0.64611200 | 3.78066500  |
| C | 2.03059900  | 0.38354200  | 2.09096500  |
| F | 3.91862600  | 1.52379100  | 3.15750200  |

|   |             |             |             |
|---|-------------|-------------|-------------|
| F | 0.07702600  | -0.86946000 | 1.36221900  |
| B | 2.67420500  | 0.19985700  | 0.55343600  |
| C | 3.99105700  | 1.17323900  | 0.25613700  |
| C | 3.08114800  | -1.44094200 | 0.57229400  |
| C | 1.58216900  | 0.76206900  | -0.63789500 |
| C | 5.16312600  | 0.78436400  | -0.42825400 |
| C | 3.94051200  | 2.56727200  | 0.50952300  |
| C | 2.42425900  | -2.49205300 | -0.07235000 |
| C | 4.12780800  | -1.92637600 | 1.40439800  |
| H | 0.93267600  | 1.49924000  | -0.12753000 |
| H | 2.17515300  | 1.34298900  | -1.35429100 |
| C | 6.22031100  | 1.65285600  | -0.76926900 |
| F | 5.32943000  | -0.54548400 | -0.86202000 |
| C | 4.96517700  | 3.47695800  | 0.19633300  |
| F | 2.79411900  | 3.12862700  | 1.09404900  |
| C | 2.71784600  | -3.86535100 | 0.00638500  |
| F | 1.28759000  | -2.23422100 | -0.94516700 |
| C | 4.48650800  | -3.27938000 | 1.54212100  |
| F | 4.88340300  | -1.02387700 | 2.14936300  |
| C | 6.12877500  | 3.01476800  | -0.44398800 |
| F | 7.34296900  | 1.17524500  | -1.44004000 |
| F | 4.83563400  | 4.82909300  | 0.49978600  |
| C | 3.77632100  | -4.26735600 | 0.83366000  |
| F | 1.98316300  | -4.80585000 | -0.70755300 |
| F | 5.53413200  | -3.65510300 | 2.36989600  |
| F | 7.15418500  | 3.89309000  | -0.76915900 |
| F | 4.10950200  | -5.60702300 | 0.95294800  |
| C | 1.96918000  | -2.59990800 | -4.08805200 |
| H | 1.46202200  | -3.48423000 | -3.67733000 |
| H | 2.15509900  | -2.80140900 | -5.15760500 |
| H | 2.95023900  | -2.52083600 | -3.60157000 |
| C | 3.13856100  | 0.36816800  | -3.77475000 |
| H | 3.75743600  | -0.34708400 | -3.21836200 |
| H | 3.51539200  | 0.38730400  | -4.81235900 |
| H | 3.31793200  | 1.36452500  | -3.35311600 |
| C | 0.66287200  | 2.43388900  | -3.84436600 |
| H | 1.47504800  | 2.80873100  | -3.20788700 |
| H | 0.87126200  | 2.77523600  | -4.87389000 |
| H | -0.26327200 | 2.92147300  | -3.51853700 |
| C | -2.01380400 | 0.73741800  | -4.38852600 |
| H | -2.22553800 | 1.65416700  | -3.82689700 |
| H | -2.05493100 | 0.99132100  | -5.46233200 |
| H | -2.83075800 | 0.03095600  | -4.18962700 |
| C | -1.17796300 | -2.38186700 | -4.55971600 |
| H | -2.24258700 | -2.15769200 | -4.42005400 |
| H | -1.02692700 | -2.57350400 | -5.63653900 |
| H | -0.95311200 | -3.31981600 | -4.03420200 |
| C | -5.53198600 | 2.90583000  | 0.40294500  |
| C | -6.74675400 | 3.19381800  | -0.27272200 |
| C | -5.05517700 | 3.84534800  | 1.35383800  |
| C | -7.45496500 | 4.38816600  | -0.02012600 |
| H | -7.13467000 | 2.48349700  | -1.00633400 |
| C | -5.76472100 | 5.03591800  | 1.61443300  |
| H | -4.13465800 | 3.63996800  | 1.90131600  |
| C | -6.96616700 | 5.31555400  | 0.92599000  |
| H | -8.38363300 | 4.59167100  | -0.55887400 |
| H | -5.38152800 | 5.74105600  | 2.35586500  |

|    |             |             |             |
|----|-------------|-------------|-------------|
| H  | -7.51398700 | 6.23930500  | 1.12641400  |
| C  | -5.84883200 | -2.04747600 | 0.75665100  |
| C  | -6.16783100 | -3.07543900 | -0.16843900 |
| C  | -6.42233800 | -2.11353400 | 2.05385700  |
| C  | -7.02449100 | -4.13625100 | 0.19197700  |
| H  | -5.75699800 | -3.03981500 | -1.17809700 |
| C  | -7.27391600 | -3.17744100 | 2.41998600  |
| H  | -6.18750300 | -1.33684200 | 2.78473800  |
| C  | -7.57942000 | -4.19477700 | 1.48956100  |
| H  | -7.26004400 | -4.91298900 | -0.53963400 |
| H  | -7.69410900 | -3.21157900 | 3.42799500  |
| H  | -8.23995300 | -5.01849000 | 1.77018800  |
| C  | -2.68764800 | 2.72265300  | -0.62849700 |
| C  | -3.08715500 | 3.58671700  | -1.68105600 |
| C  | -1.56114400 | 3.09530800  | 0.14908600  |
| C  | -2.38966100 | 4.78482800  | -1.94366000 |
| H  | -3.96054400 | 3.33125500  | -2.28376900 |
| C  | -0.85997400 | 4.29266900  | -0.10832600 |
| H  | -1.24778400 | 2.45816200  | 0.97722200  |
| C  | -1.27360800 | 5.14454100  | -1.15622500 |
| H  | -2.72549900 | 5.44034000  | -2.75091000 |
| H  | 0.00107100  | 4.55836000  | 0.50901700  |
| H  | -0.73781300 | 6.07646000  | -1.35057800 |
| C  | -2.94801400 | -2.34840400 | -0.04796500 |
| C  | -2.70129800 | -3.09231400 | -1.22876000 |
| C  | -2.56033700 | -2.91584700 | 1.19339300  |
| C  | -2.09329200 | -4.36654600 | -1.17443700 |
| H  | -3.03070100 | -2.69294300 | -2.18839900 |
| C  | -1.94990500 | -4.18575800 | 1.25189200  |
| H  | -2.73347800 | -2.35973700 | 2.11494200  |
| C  | -1.71281800 | -4.91787500 | 0.06787000  |
| H  | -1.92978500 | -4.93295900 | -2.09422700 |
| H  | -1.66226300 | -4.60120100 | 2.22047400  |
| H  | -1.24272800 | -5.90259500 | 0.11221900  |
| Zr | 0.09003300  | -0.44708700 | -1.71139300 |

|                |          |          |          |
|----------------|----------|----------|----------|
| Frequencies -- | 9.4312   | 12.9964  | 14.3189  |
| Frequencies -- | 17.3941  | 23.3171  | 26.2049  |
| Frequencies -- | 29.0058  | 32.1582  | 34.0108  |
| Frequencies -- | 35.3759  | 38.7923  | 43.5169  |
| Frequencies -- | 44.8337  | 46.5805  | 49.4834  |
| Frequencies -- | 51.0736  | 54.7587  | 57.0731  |
| Frequencies -- | 60.9706  | 64.8195  | 66.3174  |
| Frequencies -- | 71.1954  | 76.8693  | 78.5295  |
| Frequencies -- | 100.9317 | 102.8066 | 106.3323 |
| Frequencies -- | 108.9719 | 110.2666 | 118.0793 |
| Frequencies -- | 120.1867 | 122.0459 | 124.2686 |
| Frequencies -- | 127.6929 | 131.2143 | 134.9190 |
| Frequencies -- | 135.1207 | 139.5154 | 140.4939 |
| Frequencies -- | 143.4057 | 149.4142 | 150.6450 |
| Frequencies -- | 155.9148 | 157.5324 | 158.2137 |
| Frequencies -- | 163.1507 | 169.0756 | 169.9465 |
| Frequencies -- | 175.0947 | 175.9763 | 189.6725 |
| Frequencies -- | 194.9467 | 209.2321 | 210.8252 |
| Frequencies -- | 212.8781 | 215.4408 | 221.6493 |
| Frequencies -- | 224.2202 | 232.6526 | 235.9600 |
| Frequencies -- | 247.1628 | 259.1850 | 263.1178 |
| Frequencies -- | 263.9779 | 264.2133 | 265.3160 |
| Frequencies -- | 273.7426 | 274.5847 | 279.4845 |

|                |           |           |           |
|----------------|-----------|-----------|-----------|
| Frequencies -- | 281.7331  | 289.8932  | 297.6674  |
| Frequencies -- | 300.4760  | 302.7369  | 303.4024  |
| Frequencies -- | 308.5869  | 312.9604  | 325.5343  |
| Frequencies -- | 327.7286  | 329.9692  | 331.6345  |
| Frequencies -- | 336.1664  | 340.9882  | 357.6653  |
| Frequencies -- | 374.1806  | 375.8077  | 379.9204  |
| Frequencies -- | 381.1743  | 387.8541  | 390.7631  |
| Frequencies -- | 398.0744  | 404.9889  | 405.8227  |
| Frequencies -- | 407.3952  | 409.4920  | 411.3752  |
| Frequencies -- | 415.4228  | 430.7896  | 432.5209  |
| Frequencies -- | 433.3468  | 443.7906  | 451.8964  |
| Frequencies -- | 458.7077  | 467.0575  | 494.9742  |
| Frequencies -- | 500.8017  | 509.6206  | 523.7370  |
| Frequencies -- | 537.0948  | 539.5265  | 541.1056  |
| Frequencies -- | 543.0542  | 543.6848  | 548.5537  |
| Frequencies -- | 550.1550  | 552.7594  | 553.6615  |
| Frequencies -- | 582.7046  | 585.5419  | 594.6889  |
| Frequencies -- | 603.4803  | 608.7775  | 615.8585  |
| Frequencies -- | 616.9055  | 618.4068  | 621.4120  |
| Frequencies -- | 625.0056  | 626.4864  | 629.4518  |
| Frequencies -- | 635.2463  | 635.7200  | 637.5823  |
| Frequencies -- | 640.9635  | 650.9461  | 659.4448  |
| Frequencies -- | 678.8522  | 689.0737  | 692.7957  |
| Frequencies -- | 705.6148  | 710.1719  | 710.5222  |
| Frequencies -- | 711.0945  | 713.5449  | 716.5230  |
| Frequencies -- | 721.5834  | 724.1216  | 734.8527  |
| Frequencies -- | 739.9009  | 742.2768  | 748.0197  |
| Frequencies -- | 763.5255  | 772.2806  | 776.2219  |
| Frequencies -- | 778.8358  | 794.1573  | 800.2091  |
| Frequencies -- | 801.3686  | 806.8190  | 823.2252  |
| Frequencies -- | 840.6278  | 859.6519  | 860.0204  |
| Frequencies -- | 860.7813  | 865.9316  | 870.2681  |
| Frequencies -- | 872.0171  | 887.4744  | 903.4426  |
| Frequencies -- | 908.3970  | 913.4266  | 931.5870  |
| Frequencies -- | 938.1409  | 942.1451  | 945.6415  |
| Frequencies -- | 957.6704  | 967.0456  | 971.0718  |
| Frequencies -- | 986.6225  | 986.8259  | 987.3425  |
| Frequencies -- | 994.7953  | 995.6633  | 996.8843  |
| Frequencies -- | 1004.9577 | 1005.1483 | 1009.3590 |
| Frequencies -- | 1010.3572 | 1011.3828 | 1014.4443 |
| Frequencies -- | 1021.2317 | 1023.7638 | 1026.7672 |
| Frequencies -- | 1029.8418 | 1039.3229 | 1040.4109 |
| Frequencies -- | 1042.0478 | 1044.1828 | 1044.6274 |
| Frequencies -- | 1045.9980 | 1049.3025 | 1049.9758 |
| Frequencies -- | 1051.6329 | 1052.3707 | 1052.8473 |
| Frequencies -- | 1054.7784 | 1055.6450 | 1084.0150 |
| Frequencies -- | 1085.9683 | 1088.6067 | 1089.5534 |
| Frequencies -- | 1091.0382 | 1091.8709 | 1096.0216 |
| Frequencies -- | 1123.9078 | 1130.4615 | 1134.7357 |
| Frequencies -- | 1171.3425 | 1176.1301 | 1182.5739 |
| Frequencies -- | 1182.7307 | 1183.4922 | 1184.0128 |
| Frequencies -- | 1201.7999 | 1204.3704 | 1205.4493 |
| Frequencies -- | 1206.6580 | 1207.4403 | 1209.7010 |
| Frequencies -- | 1212.3115 | 1232.5721 | 1272.4696 |
| Frequencies -- | 1280.5457 | 1290.6398 | 1305.6799 |
| Frequencies -- | 1319.5172 | 1320.8423 | 1325.9163 |
| Frequencies -- | 1327.9338 | 1331.4630 | 1333.7475 |
| Frequencies -- | 1334.8111 | 1339.0718 | 1344.4479 |
| Frequencies -- | 1347.5367 | 1366.6102 | 1369.3712 |
| Frequencies -- | 1369.7368 | 1370.5437 | 1381.6839 |
| Frequencies -- | 1408.6803 | 1412.2021 | 1413.8974 |
| Frequencies -- | 1417.2107 | 1417.3673 | 1421.6775 |
| Frequencies -- | 1424.5369 | 1425.8839 | 1427.1950 |

|                |           |           |           |
|----------------|-----------|-----------|-----------|
| Frequencies -- | 1430.5033 | 1434.6210 | 1441.4881 |
| Frequencies -- | 1443.1974 | 1444.5753 | 1445.6184 |
| Frequencies -- | 1447.4562 | 1454.5763 | 1458.1640 |
| Frequencies -- | 1461.8011 | 1466.0936 | 1466.9475 |
| Frequencies -- | 1470.7829 | 1486.1412 | 1492.7020 |
| Frequencies -- | 1494.0830 | 1497.1672 | 1497.9501 |
| Frequencies -- | 1500.4097 | 1502.2879 | 1503.7105 |
| Frequencies -- | 1506.8260 | 1508.5612 | 1509.5472 |
| Frequencies -- | 1511.9512 | 1517.2065 | 1520.4202 |
| Frequencies -- | 1533.3947 | 1589.6734 | 1589.9823 |
| Frequencies -- | 1592.8419 | 1594.7311 | 1595.3611 |
| Frequencies -- | 1595.4616 | 1597.5979 | 1600.0702 |
| Frequencies -- | 1618.0562 | 1619.3666 | 1622.7365 |
| Frequencies -- | 1623.7870 | 1623.8212 | 1624.3691 |
| Frequencies -- | 1626.7876 | 3008.4792 | 3009.0005 |
| Frequencies -- | 3010.2515 | 3011.0121 | 3012.3274 |
| Frequencies -- | 3014.5407 | 3097.7078 | 3102.0636 |
| Frequencies -- | 3107.4990 | 3107.9022 | 3109.5695 |
| Frequencies -- | 3121.6539 | 3139.2347 | 3149.1313 |
| Frequencies -- | 3151.8567 | 3152.5084 | 3153.5908 |
| Frequencies -- | 3154.1111 | 3156.2889 | 3157.1729 |
| Frequencies -- | 3160.0198 | 3160.1187 | 3161.3325 |
| Frequencies -- | 3165.0338 | 3165.6511 | 3172.6350 |
| Frequencies -- | 3173.5523 | 3176.9367 | 3184.1601 |
| Frequencies -- | 3184.2973 | 3184.7887 | 3184.8721 |
| Frequencies -- | 3192.8644 | 3194.0624 | 3195.6603 |
| Frequencies -- | 3196.7721 | 3197.0881 | 3202.5668 |

**Catalyst 30:**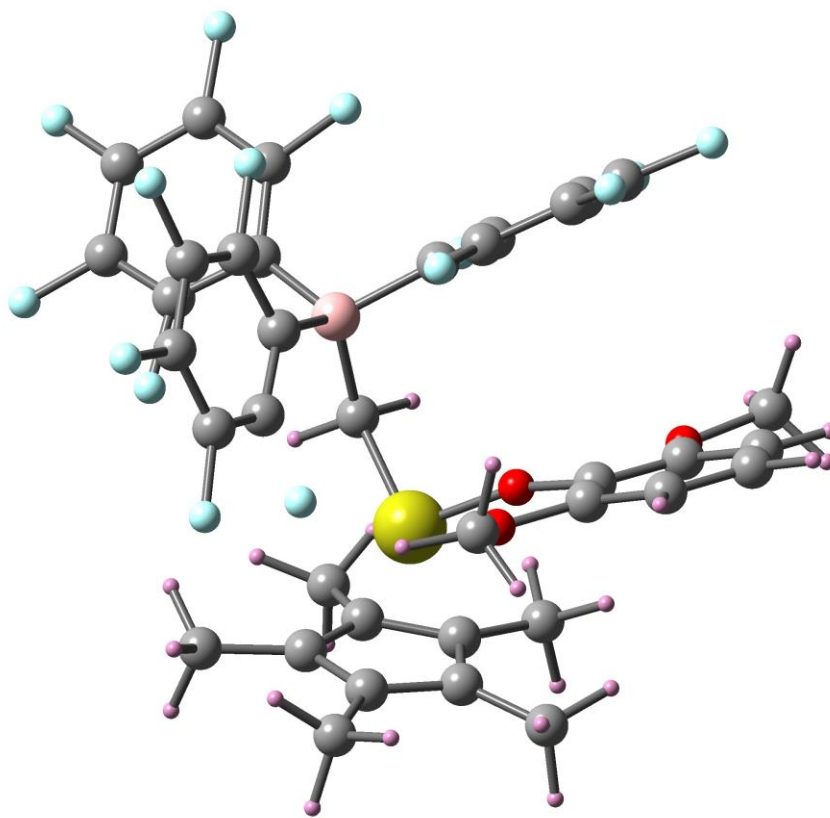

| <b>vacuum</b> | <b>toluene-like solvent</b> | <b>D3 dispersion</b> |
|---------------|-----------------------------|----------------------|
| -3230.8694117 | -3230.8803179               | -0.57311736          |

|    |             |             |             |
|----|-------------|-------------|-------------|
| Ti | 1.24348700  | -1.35988300 | -1.04209600 |
| O  | 2.32690000  | -0.11511200 | -0.36349700 |
| C  | 3.40014800  | 0.48329300  | 0.24710800  |
| C  | 3.88092500  | -0.04753900 | 1.48004900  |
| C  | 4.00861700  | 1.64443400  | -0.31233900 |
| C  | 4.94180500  | 0.59082000  | 2.16100900  |
| C  | 5.07428100  | 2.27341800  | 0.37482500  |
| C  | 5.52295300  | 1.74596800  | 1.60133400  |
| H  | 5.30934700  | 0.20844300  | 3.11083400  |
| H  | 5.54650700  | 3.16681400  | -0.02765500 |
| H  | 6.33808300  | 2.24360200  | 2.12978100  |
| C  | 0.86152700  | -2.41714600 | -3.21790200 |
| C  | 2.18503400  | -1.81534500 | -3.15606700 |
| C  | 0.81424400  | -3.47147400 | -2.24156700 |
| C  | 2.97101500  | -2.54747500 | -2.18329200 |
| C  | 2.11319800  | -3.54538000 | -1.59198200 |
| F  | -1.73106000 | -3.00307900 | 4.90863900  |
| C  | -1.61974700 | -2.24291100 | 3.75464300  |
| C  | -2.36810200 | -1.06088300 | 3.59334000  |
| C  | -0.75023800 | -2.63085700 | 2.72480900  |
| C  | -2.23271900 | -0.30201800 | 2.41639700  |
| F  | -3.21937700 | -0.65097000 | 4.60957200  |
| C  | -0.68081700 | -1.82084400 | 1.57945400  |

|   |             |             |             |
|---|-------------|-------------|-------------|
| F | 0.02750200  | -3.78023000 | 2.84803000  |
| C | -1.38012100 | -0.63895400 | 1.33232200  |
| F | -2.97247900 | 0.87827800  | 2.36815100  |
| F | 0.26566400  | -2.33099700 | 0.60153400  |
| B | -1.31034600 | 0.29687300  | -0.06425700 |
| C | -2.92604800 | 0.44469200  | -0.52026000 |
| C | -0.54399200 | 1.75118600  | 0.20400200  |
| C | -0.53278800 | -0.42907000 | -1.38086900 |
| C | -3.70189100 | 1.62915400  | -0.53353300 |
| C | -3.66154100 | -0.69400200 | -0.93085700 |
| C | 0.17455600  | 2.11838900  | 1.36279700  |
| C | -0.46598600 | 2.72927500  | -0.81904700 |
| H | -1.20801300 | -1.13293900 | -1.87867300 |
| H | -0.28634000 | 0.36100000  | -2.11291200 |
| C | -5.03971900 | 1.70005300  | -0.97437100 |
| F | -3.18246700 | 2.83446000  | -0.05374100 |
| C | -4.99753500 | -0.68091800 | -1.37147000 |
| F | -3.06634700 | -1.97388200 | -0.88403300 |
| C | 0.87731400  | 3.33031500  | 1.52288200  |
| F | 0.26782000  | 1.24862900  | 2.46422900  |
| C | 0.22300300  | 3.94846200  | -0.71532800 |
| F | -1.11218000 | 2.51202100  | -2.04714400 |
| C | -5.69554200 | 0.53694300  | -1.40812600 |
| F | -5.72395500 | 2.91088100  | -0.96844800 |
| F | -5.63094900 | -1.85750300 | -1.76526400 |
| C | 0.90449700  | 4.25753600  | 0.47263600  |
| F | 1.57219900  | 3.59757400  | 2.69959300  |
| F | 0.26584400  | 4.84064900  | -1.78499200 |
| F | -7.01139400 | 0.58505200  | -1.84800200 |
| F | 1.62599200  | 5.44203400  | 0.58572000  |
| C | 4.44491500  | -2.35802500 | -1.91062800 |
| H | 4.71721000  | -2.60401700 | -0.87527900 |
| H | 5.03284700  | -3.02085300 | -2.56953300 |
| H | 4.77475400  | -1.32958000 | -2.10612600 |
| C | 2.69945000  | -0.72822100 | -4.07344100 |
| H | 3.42977000  | -0.07548700 | -3.57839200 |
| H | 3.19371100  | -1.17891500 | -4.95194000 |
| H | 1.88804600  | -0.09009100 | -4.44834200 |
| C | -0.19946000 | -2.10080400 | -4.24431500 |
| H | -0.26532500 | -1.02704000 | -4.46650300 |
| H | 0.03408600  | -2.61833300 | -5.19104700 |
| H | -1.19526200 | -2.43647500 | -3.92833600 |
| C | -0.35215200 | -4.39868500 | -1.98681800 |
| H | -1.32108300 | -3.89510700 | -2.10122600 |
| H | -0.33191400 | -5.23732900 | -2.70477400 |
| H | -0.32141100 | -4.83572400 | -0.97998700 |
| C | 2.51829400  | -4.56269500 | -0.54838400 |
| H | 1.70763500  | -4.78330100 | 0.15983900  |
| H | 2.79091700  | -5.51508400 | -1.03550900 |
| H | 3.38869300  | -4.23296600 | 0.03426100  |
| O | 3.22508200  | -1.20955100 | 1.90704400  |
| O | 3.47891300  | 2.06831400  | -1.53482900 |
| C | 3.48899500  | -1.70742500 | 3.26448600  |
| H | 3.27031400  | -0.93301200 | 4.01688700  |
| H | 2.80486000  | -2.55481200 | 3.39171300  |
| H | 4.53121500  | -2.05198600 | 3.36827500  |
| C | 3.96714700  | 3.32937700  | -2.11409200 |



|   |            |            |             |
|---|------------|------------|-------------|
| H | 3.35434600 | 3.47970300 | -3.01056700 |
| H | 3.81978400 | 4.17238500 | -1.42096400 |
| H | 5.03063700 | 3.25283800 | -2.39519700 |

|                |           |           |           |
|----------------|-----------|-----------|-----------|
| Frequencies -- | 7.1475    | 18.7093   | 22.3433   |
| Frequencies -- | 26.3083   | 29.1057   | 31.9232   |
| Frequencies -- | 32.9804   | 39.2043   | 39.8698   |
| Frequencies -- | 44.8523   | 47.8646   | 53.7577   |
| Frequencies -- | 60.1485   | 67.1658   | 68.0623   |
| Frequencies -- | 80.3928   | 93.4915   | 95.0558   |
| Frequencies -- | 99.2861   | 103.7514  | 106.4100  |
| Frequencies -- | 112.3263  | 113.4730  | 117.2382  |
| Frequencies -- | 119.6835  | 121.3669  | 121.8590  |
| Frequencies -- | 124.9716  | 132.8075  | 137.4970  |
| Frequencies -- | 144.4725  | 148.9534  | 155.5961  |
| Frequencies -- | 157.8565  | 160.2176  | 163.2806  |
| Frequencies -- | 165.1744  | 166.7022  | 168.5713  |
| Frequencies -- | 184.7598  | 195.0130  | 197.7053  |
| Frequencies -- | 211.8936  | 216.7141  | 220.9373  |
| Frequencies -- | 224.1884  | 234.9626  | 251.4005  |
| Frequencies -- | 257.8398  | 264.2252  | 264.4022  |
| Frequencies -- | 265.0009  | 265.0499  | 275.3359  |
| Frequencies -- | 276.8128  | 277.8404  | 278.9020  |
| Frequencies -- | 287.8390  | 294.0070  | 296.5330  |
| Frequencies -- | 300.8803  | 302.5113  | 305.9468  |
| Frequencies -- | 313.5721  | 315.5333  | 324.9774  |
| Frequencies -- | 331.8422  | 338.7431  | 349.2324  |
| Frequencies -- | 356.1333  | 357.3898  | 365.3080  |
| Frequencies -- | 375.0491  | 377.1524  | 378.2001  |
| Frequencies -- | 379.9990  | 382.4258  | 391.7498  |
| Frequencies -- | 399.5380  | 410.3345  | 420.5481  |
| Frequencies -- | 431.3981  | 432.3444  | 442.2352  |
| Frequencies -- | 452.4953  | 458.4941  | 468.0643  |
| Frequencies -- | 500.3506  | 519.1044  | 535.5568  |
| Frequencies -- | 537.1802  | 538.0183  | 541.2146  |
| Frequencies -- | 544.3748  | 547.3587  | 557.0459  |
| Frequencies -- | 564.6616  | 579.3782  | 580.7796  |
| Frequencies -- | 586.9616  | 599.2514  | 604.9151  |
| Frequencies -- | 605.7947  | 611.7009  | 616.0213  |
| Frequencies -- | 625.4978  | 634.4891  | 636.1504  |
| Frequencies -- | 640.6196  | 655.4668  | 671.6718  |
| Frequencies -- | 706.9157  | 716.2847  | 721.7284  |
| Frequencies -- | 726.3570  | 729.5477  | 735.8681  |
| Frequencies -- | 746.0711  | 748.1733  | 759.3528  |
| Frequencies -- | 766.7329  | 801.4362  | 804.2843  |
| Frequencies -- | 831.2242  | 844.7708  | 848.7965  |
| Frequencies -- | 851.4638  | 866.2107  | 877.5608  |
| Frequencies -- | 906.2603  | 910.7163  | 919.5690  |
| Frequencies -- | 951.5460  | 967.9705  | 973.8267  |
| Frequencies -- | 980.2117  | 984.2527  | 1008.5563 |
| Frequencies -- | 1021.8358 | 1029.6681 | 1042.2126 |
| Frequencies -- | 1043.6446 | 1044.4882 | 1047.7867 |
| Frequencies -- | 1049.0732 | 1049.7346 | 1052.6123 |
| Frequencies -- | 1054.5886 | 1081.7549 | 1087.3859 |
| Frequencies -- | 1090.8109 | 1098.8336 | 1100.5848 |
| Frequencies -- | 1126.1973 | 1128.4278 | 1129.4687 |
| Frequencies -- | 1167.3094 | 1174.5571 | 1174.9619 |
| Frequencies -- | 1176.0034 | 1201.1480 | 1207.8903 |
| Frequencies -- | 1208.0303 | 1209.4101 | 1228.6224 |
| Frequencies -- | 1255.0336 | 1294.7749 | 1297.3269 |
| Frequencies -- | 1313.6209 | 1320.2184 | 1338.0292 |
| Frequencies -- | 1345.7679 | 1350.1522 | 1377.6514 |

|                |           |           |           |
|----------------|-----------|-----------|-----------|
| Frequencies -- | 1390.3426 | 1410.3007 | 1412.7733 |
| Frequencies -- | 1413.7322 | 1416.9768 | 1421.3031 |
| Frequencies -- | 1424.2115 | 1427.6876 | 1427.9778 |
| Frequencies -- | 1429.1280 | 1434.9302 | 1446.1508 |
| Frequencies -- | 1449.4801 | 1452.8122 | 1457.1873 |
| Frequencies -- | 1462.8301 | 1465.8999 | 1468.4442 |
| Frequencies -- | 1470.0636 | 1474.4392 | 1478.8673 |
| Frequencies -- | 1479.9022 | 1485.8687 | 1487.7022 |
| Frequencies -- | 1491.5775 | 1492.1721 | 1493.6563 |
| Frequencies -- | 1496.2339 | 1497.4511 | 1498.0950 |
| Frequencies -- | 1504.9350 | 1506.2327 | 1511.4728 |
| Frequencies -- | 1513.9648 | 1519.8287 | 1591.7491 |
| Frequencies -- | 1592.2590 | 1593.8757 | 1600.3783 |
| Frequencies -- | 1608.9159 | 1616.2878 | 1622.6068 |
| Frequencies -- | 1629.1377 | 3003.5211 | 3005.2851 |
| Frequencies -- | 3008.5305 | 3009.1390 | 3009.7087 |
| Frequencies -- | 3010.5551 | 3012.5598 | 3026.7023 |
| Frequencies -- | 3099.3194 | 3101.1549 | 3102.3128 |
| Frequencies -- | 3103.7539 | 3105.3015 | 3105.8514 |
| Frequencies -- | 3108.4721 | 3136.8990 | 3142.1146 |
| Frequencies -- | 3143.0524 | 3145.3345 | 3147.5524 |
| Frequencies -- | 3149.3908 | 3164.2655 | 3165.4715 |
| Frequencies -- | 3178.9511 | 3216.2414 | 3224.3810 |

**Catalyst 31:**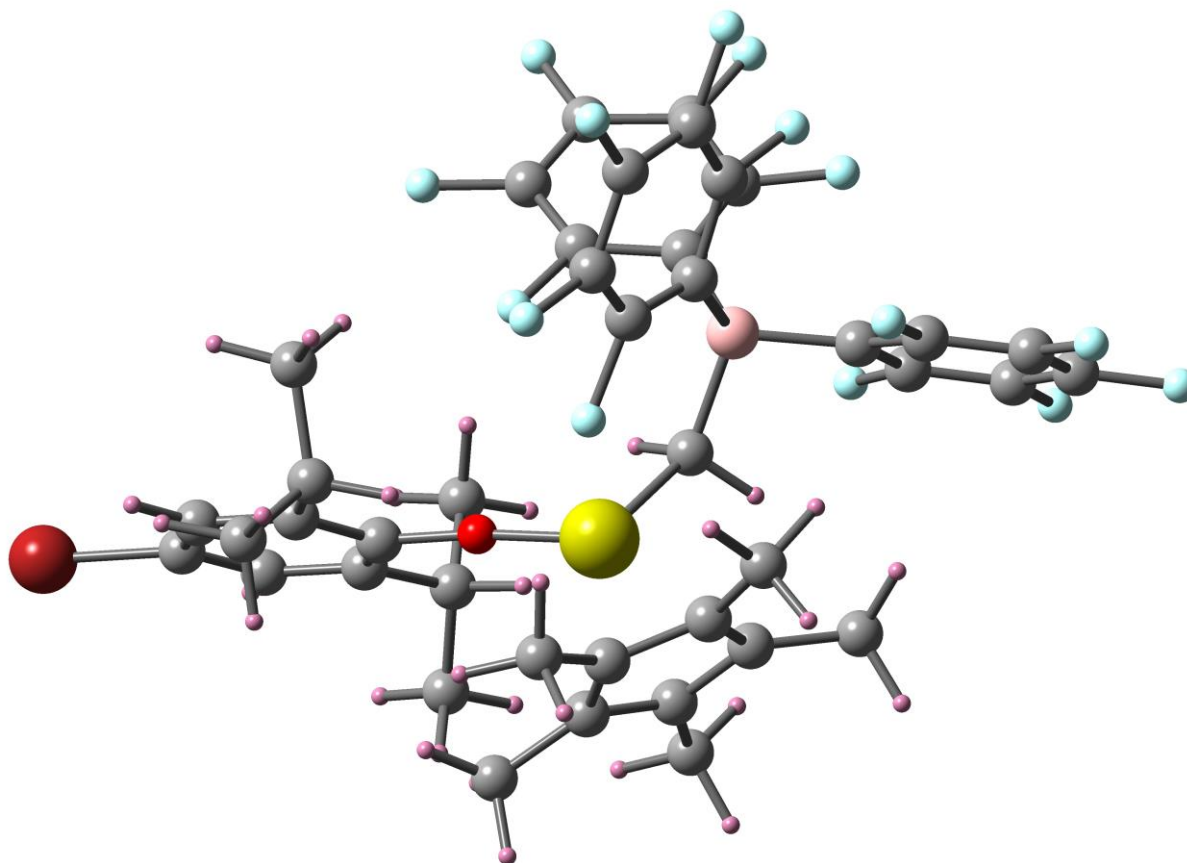

| <b>vacuum</b> | <b>toluene-like solvent</b> | <b>D3 dispersion</b> |
|---------------|-----------------------------|----------------------|
| -3250.2151083 | -3250.2242382               | -0.64786065          |

|    |             |             |             |
|----|-------------|-------------|-------------|
| Ti | -0.51051900 | -1.73428500 | -0.39065600 |
| O  | -2.08448900 | -0.87964200 | -0.38958800 |
| C  | -3.37955600 | -0.36743500 | -0.37044100 |
| C  | -3.88018200 | 0.29724100  | -1.53381900 |
| C  | -4.15759000 | -0.48995500 | 0.82463400  |
| C  | -5.19671800 | 0.81218100  | -1.48756100 |
| C  | -5.46487900 | 0.04907200  | 0.82217900  |
| C  | -5.97238100 | 0.67947800  | -0.32528200 |
| H  | -5.60332900 | 1.32413800  | -2.35745400 |
| H  | -6.07695400 | -0.01994000 | 1.71893700  |
| C  | -0.42558300 | -3.31636000 | -2.18379900 |
| C  | 0.87579000  | -3.43282100 | -1.55570100 |
| C  | -1.43028900 | -3.76459500 | -1.23660400 |
| C  | 0.67287600  | -3.89273000 | -0.20748400 |
| C  | -0.75081100 | -4.09852400 | -0.00834900 |
| F  | 1.99607000  | -0.31331000 | 5.87375300  |
| C  | 1.98924100  | -0.15907900 | 4.49759900  |
| C  | 2.89769400  | 0.70987200  | 3.86235600  |
| C  | 1.07786800  | -0.86909800 | 3.70291300  |
| C  | 2.86938500  | 0.85085700  | 2.46309000  |

|   |             |             |             |
|---|-------------|-------------|-------------|
| F | 3.81511200  | 1.41351800  | 4.62748500  |
| C | 1.11883300  | -0.66778500 | 2.31260000  |
| F | 0.16204900  | -1.74425100 | 4.27879400  |
| C | 1.97579900  | 0.16487400  | 1.59508900  |
| F | 3.81893200  | 1.71524300  | 1.92236900  |
| F | 0.12724200  | -1.47541100 | 1.61929300  |
| B | 1.97718600  | 0.47484100  | -0.06349200 |
| C | 1.61166500  | 2.11733100  | -0.09538700 |
| C | 3.44401000  | 0.09240400  | -0.75074100 |
| C | 0.83262500  | -0.34542900 | -1.04825500 |
| C | 2.47446800  | 3.19107500  | -0.42621000 |
| C | 0.32225900  | 2.55289100  | 0.29110000  |
| C | 4.44115900  | -0.73501400 | -0.19020500 |
| C | 3.75518700  | 0.50820800  | -2.07000500 |
| H | 0.09067100  | 0.39935800  | -1.39156400 |
| H | 1.37025300  | -0.69417100 | -1.93663000 |
| C | 2.08453700  | 4.54715600  | -0.43724700 |
| F | 3.81529100  | 2.96952200  | -0.74512500 |
| C | -0.11803900 | 3.88835800  | 0.30128000  |
| F | -0.62562800 | 1.60661700  | 0.73096200  |
| C | 5.65539400  | -1.07278500 | -0.82385800 |
| F | 4.25687600  | -1.32765000 | 1.07449000  |
| C | 4.94838000  | 0.20486500  | -2.74815800 |
| F | 2.82864900  | 1.27462100  | -2.79114600 |
| C | 0.77425400  | 4.90382000  | -0.07938400 |
| F | 2.99147900  | 5.53926900  | -0.79002300 |
| F | -1.41821200 | 4.20792500  | 0.68328200  |
| C | 5.92032600  | -0.58909800 | -2.11399400 |
| F | 6.58229300  | -1.89364400 | -0.18827400 |
| F | 5.17527400  | 0.67479400  | -4.03711500 |
| F | 0.37226800  | 6.23151100  | -0.08859800 |
| F | 7.10627400  | -0.90683300 | -2.76060000 |
| C | -3.03545100 | 0.51152600  | -2.79933700 |
| H | -2.09348200 | -0.03837100 | -2.67284800 |
| C | -3.60013400 | -1.11539000 | 2.11275300  |
| H | -2.66771800 | -1.63647100 | 1.85850900  |
| C | -2.66264500 | 2.01458700  | -2.97019400 |
| H | -1.98008700 | 2.14312700  | -3.82550000 |
| H | -3.55434800 | 2.63352800  | -3.15309200 |
| H | -2.16498700 | 2.40474500  | -2.07085800 |
| C | -3.72287200 | -0.03962500 | -4.08133100 |
| H | -3.99764800 | -1.10024400 | -3.96923100 |
| H | -4.63959000 | 0.51606200  | -4.32970700 |
| H | -3.04145200 | 0.05058500  | -4.94240000 |
| C | -3.23277700 | -0.00858500 | 3.14731400  |
| H | -4.12858600 | 0.53337200  | 3.48736800  |
| H | -2.75193500 | -0.45811400 | 4.03069000  |
| H | -2.54029900 | 0.72709900  | 2.71302400  |
| C | -4.55187100 | -2.17206400 | 2.74023400  |
| H | -5.48379100 | -1.72192300 | 3.11328200  |
| H | -4.82555600 | -2.95283600 | 2.01291500  |
| H | -4.05863500 | -2.65789700 | 3.59711000  |
| C | -0.65985300 | -2.97833600 | -3.63888900 |
| H | 0.03037000  | -2.20556800 | -4.00576800 |
| H | -0.49735100 | -3.87605800 | -4.26093400 |
| H | -1.68338100 | -2.63477400 | -3.83140600 |
| C | 2.20133300  | -3.31670000 | -2.26644200 |

|    |             |             |             |
|----|-------------|-------------|-------------|
| H  | 2.41387300  | -4.26026000 | -2.79912300 |
| H  | 2.21193500  | -2.51739200 | -3.01923900 |
| H  | 3.03121400  | -3.14198600 | -1.57342000 |
| C  | -2.89850300 | -3.96818600 | -1.52992900 |
| H  | -3.27304600 | -3.27676300 | -2.29502700 |
| H  | -3.06281500 | -4.99281900 | -1.90659800 |
| H  | -3.52712200 | -3.84376500 | -0.63868000 |
| C  | 1.75717500  | -4.23676500 | 0.78794700  |
| H  | 2.12327500  | -5.26156300 | 0.60142600  |
| H  | 2.62406000  | -3.56782600 | 0.71859100  |
| H  | 1.39368600  | -4.21045800 | 1.82365000  |
| C  | -1.38321300 | -4.67696300 | 1.23836000  |
| H  | -2.46409200 | -4.49434800 | 1.27937900  |
| H  | -1.23823800 | -5.77100000 | 1.25680600  |
| H  | -0.93955800 | -4.28170600 | 2.16374300  |
| Br | -7.80203200 | 1.40740900  | -0.29652300 |

|                |          |          |          |
|----------------|----------|----------|----------|
| Frequencies -- | 6.2435   | 11.1897  | 17.8615  |
| Frequencies -- | 21.3617  | 25.7736  | 29.7887  |
| Frequencies -- | 32.3045  | 34.9941  | 37.1659  |
| Frequencies -- | 43.3056  | 45.3379  | 53.5848  |
| Frequencies -- | 55.0195  | 57.6395  | 60.7058  |
| Frequencies -- | 71.8429  | 73.6150  | 87.5601  |
| Frequencies -- | 99.5158  | 100.7858 | 104.2980 |
| Frequencies -- | 108.3174 | 113.7843 | 117.1547 |
| Frequencies -- | 119.8238 | 121.5553 | 123.5638 |
| Frequencies -- | 125.5024 | 128.0725 | 129.3733 |
| Frequencies -- | 134.5269 | 136.0164 | 137.4807 |
| Frequencies -- | 141.8321 | 143.4361 | 146.9878 |
| Frequencies -- | 150.1965 | 157.5831 | 159.3097 |
| Frequencies -- | 162.2033 | 164.1845 | 171.8894 |
| Frequencies -- | 175.4092 | 188.6386 | 204.0916 |
| Frequencies -- | 211.9445 | 215.0728 | 215.5381 |
| Frequencies -- | 223.7148 | 225.1063 | 233.9804 |
| Frequencies -- | 237.9777 | 242.4237 | 250.9063 |
| Frequencies -- | 254.3381 | 261.5102 | 263.5379 |
| Frequencies -- | 264.4787 | 264.8206 | 274.1251 |
| Frequencies -- | 275.0735 | 279.0139 | 285.7854 |
| Frequencies -- | 291.3720 | 296.7479 | 298.8262 |
| Frequencies -- | 300.2043 | 301.5685 | 303.1210 |
| Frequencies -- | 304.9257 | 307.5995 | 316.2620 |
| Frequencies -- | 320.4015 | 323.3347 | 328.0422 |
| Frequencies -- | 332.9542 | 345.4668 | 353.0581 |
| Frequencies -- | 360.2594 | 373.4545 | 376.4997 |
| Frequencies -- | 380.0265 | 385.9557 | 393.0538 |
| Frequencies -- | 395.3903 | 398.9440 | 416.4798 |
| Frequencies -- | 424.5803 | 430.8318 | 432.6591 |
| Frequencies -- | 435.2607 | 444.0636 | 453.5555 |
| Frequencies -- | 456.2046 | 460.1676 | 467.4113 |
| Frequencies -- | 520.3794 | 532.2693 | 536.2418 |
| Frequencies -- | 537.5627 | 541.9418 | 546.0997 |
| Frequencies -- | 549.4840 | 554.0349 | 564.3319 |
| Frequencies -- | 565.9558 | 582.0189 | 583.9831 |
| Frequencies -- | 598.7981 | 603.1793 | 607.3608 |
| Frequencies -- | 614.6522 | 619.8014 | 623.2723 |
| Frequencies -- | 625.4753 | 633.5763 | 637.0568 |
| Frequencies -- | 642.5825 | 651.1143 | 680.5789 |
| Frequencies -- | 696.9772 | 714.5754 | 726.2754 |
| Frequencies -- | 736.2329 | 740.4836 | 746.4977 |
| Frequencies -- | 762.3923 | 771.2574 | 776.6186 |
| Frequencies -- | 801.0053 | 804.3048 | 807.1753 |

|                |           |           |           |
|----------------|-----------|-----------|-----------|
| Frequencies -- | 819.3507  | 834.0464  | 863.3116  |
| Frequencies -- | 880.3693  | 883.6886  | 896.2345  |
| Frequencies -- | 903.6726  | 905.3102  | 915.0149  |
| Frequencies -- | 928.2089  | 930.3789  | 931.9454  |
| Frequencies -- | 945.7694  | 964.4612  | 966.8569  |
| Frequencies -- | 967.8103  | 971.9661  | 989.0692  |
| Frequencies -- | 1003.9755 | 1023.5398 | 1034.1223 |
| Frequencies -- | 1038.3802 | 1041.6344 | 1043.2756 |
| Frequencies -- | 1046.2348 | 1048.4190 | 1049.2014 |
| Frequencies -- | 1051.5907 | 1054.6688 | 1071.0516 |
| Frequencies -- | 1082.4128 | 1085.5633 | 1088.0380 |
| Frequencies -- | 1090.7393 | 1114.3620 | 1117.5276 |
| Frequencies -- | 1124.5445 | 1125.6078 | 1167.4132 |
| Frequencies -- | 1173.0407 | 1176.4101 | 1187.1061 |
| Frequencies -- | 1198.8686 | 1202.8025 | 1211.3331 |
| Frequencies -- | 1213.9583 | 1261.9368 | 1263.9504 |
| Frequencies -- | 1294.6615 | 1301.3528 | 1317.4825 |
| Frequencies -- | 1318.2694 | 1320.3365 | 1324.4158 |
| Frequencies -- | 1335.1553 | 1339.2477 | 1345.0034 |
| Frequencies -- | 1349.9581 | 1372.6292 | 1394.4826 |
| Frequencies -- | 1401.9462 | 1403.2480 | 1410.1962 |
| Frequencies -- | 1410.6500 | 1415.8030 | 1416.2347 |
| Frequencies -- | 1419.6782 | 1421.1888 | 1422.3466 |
| Frequencies -- | 1423.9227 | 1424.8827 | 1426.1062 |
| Frequencies -- | 1428.5043 | 1431.0962 | 1434.8742 |
| Frequencies -- | 1437.6459 | 1450.9719 | 1454.0427 |
| Frequencies -- | 1464.0214 | 1466.9691 | 1468.0431 |
| Frequencies -- | 1471.8855 | 1481.4208 | 1486.2765 |
| Frequencies -- | 1487.8375 | 1489.4859 | 1491.1632 |
| Frequencies -- | 1492.3723 | 1494.6990 | 1499.0312 |
| Frequencies -- | 1499.8400 | 1502.3115 | 1502.6376 |
| Frequencies -- | 1504.8413 | 1508.0536 | 1508.8138 |
| Frequencies -- | 1509.4157 | 1510.9348 | 1517.0760 |
| Frequencies -- | 1522.2772 | 1577.3861 | 1586.0366 |
| Frequencies -- | 1590.7210 | 1593.6459 | 1596.0988 |
| Frequencies -- | 1617.0963 | 1619.0441 | 1630.2637 |
| Frequencies -- | 3009.2872 | 3010.0450 | 3010.1888 |
| Frequencies -- | 3011.1450 | 3012.2753 | 3013.1491 |
| Frequencies -- | 3013.6386 | 3014.2383 | 3015.0108 |
| Frequencies -- | 3015.6798 | 3077.9640 | 3079.7821 |
| Frequencies -- | 3096.9514 | 3098.8064 | 3104.7664 |
| Frequencies -- | 3106.3550 | 3107.0512 | 3109.3010 |
| Frequencies -- | 3109.8845 | 3114.1477 | 3114.4067 |
| Frequencies -- | 3123.4414 | 3124.3758 | 3132.2124 |
| Frequencies -- | 3134.3014 | 3142.6013 | 3143.1185 |
| Frequencies -- | 3147.3724 | 3150.9538 | 3152.7231 |
| Frequencies -- | 3165.7289 | 3208.7220 | 3216.0650 |

**Catalyst 33:**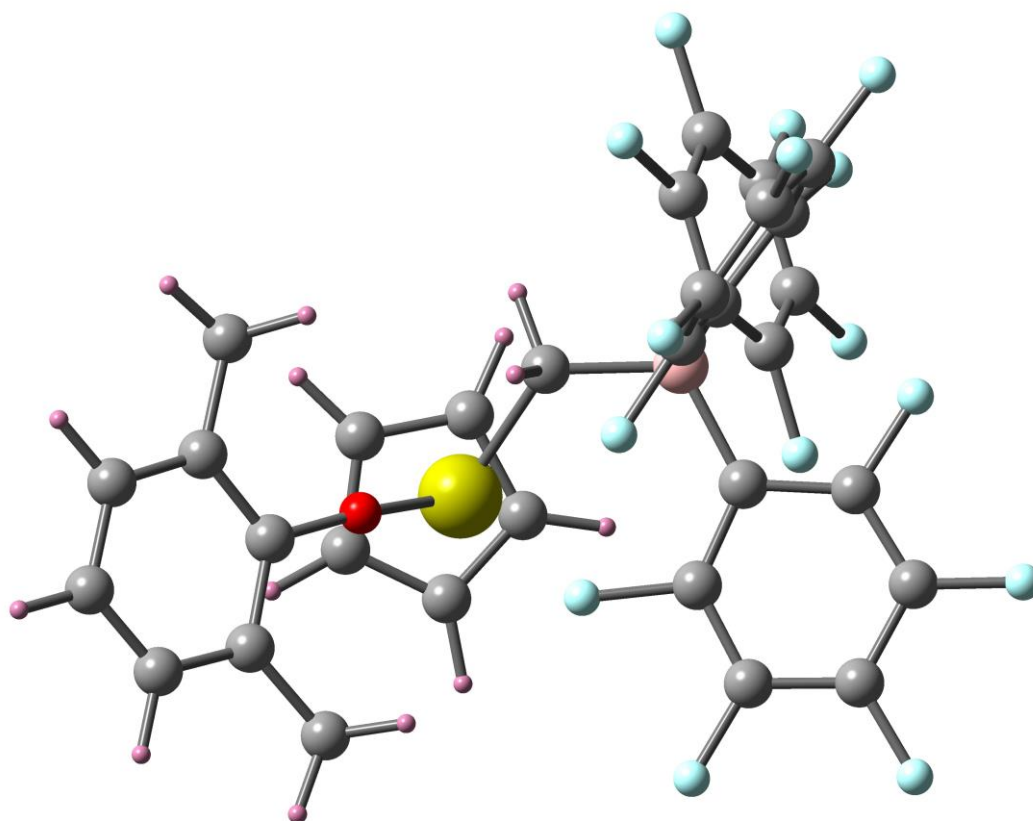

| <b>vacuum</b> | <b>toluene-like solvent</b> | <b>D3 dispersion</b> |
|---------------|-----------------------------|----------------------|
| -2884.0338659 | -2884.0459511               | -0.46742609          |

|    |             |             |             |
|----|-------------|-------------|-------------|
| Ti | -2.00747100 | -1.28229000 | -0.03782100 |
| O  | -3.47016000 | -0.39783400 | -0.53192500 |
| C  | -4.76233300 | 0.01653000  | -0.84257000 |
| C  | -5.07039500 | 0.31838600  | -2.20110400 |
| C  | -5.70963500 | 0.15379500  | 0.21403200  |
| C  | -6.38634200 | 0.74868300  | -2.48821400 |
| C  | -7.00917000 | 0.59247100  | -0.12944200 |
| C  | -7.34990000 | 0.88304400  | -1.46690600 |
| H  | -6.65212300 | 0.98723100  | -3.51977500 |
| H  | -7.75432100 | 0.71287700  | 0.65919400  |
| H  | -8.35882700 | 1.22097600  | -1.71088800 |
| H  | -2.57374900 | -3.31503800 | -2.23653600 |
| C  | -2.24430700 | -3.32476200 | -1.20084600 |
| C  | -0.87651100 | -3.30500900 | -0.74708700 |
| C  | -3.09901400 | -3.41448300 | -0.04709200 |
| H  | 0.00075100  | -3.27573400 | -1.38031400 |
| C  | -0.89063700 | -3.34935800 | 0.68382400  |
| H  | -4.18452600 | -3.44848600 | -0.06017300 |
| C  | -2.26205100 | -3.40953900 | 1.11590300  |
| H  | -0.02152500 | -3.33232000 | 1.33324700  |
| H  | -2.60051800 | -3.45358600 | 2.14827000  |
| F  | 0.74439400  | 1.20399200  | 5.72178700  |

|                |             |             |             |
|----------------|-------------|-------------|-------------|
| C              | 0.78061500  | 0.92308300  | 4.36701600  |
| C              | 1.95923700  | 1.11811800  | 3.62032500  |
| C              | -0.35771400 | 0.43399500  | 3.70860000  |
| C              | 1.97370100  | 0.82670800  | 2.24403800  |
| F              | 3.09709600  | 1.58853100  | 4.25636400  |
| C              | -0.25275700 | 0.17017100  | 2.33252400  |
| F              | -1.54368300 | 0.22031200  | 4.39936400  |
| C              | 0.86166100  | 0.33177800  | 1.51026000  |
| F              | 3.18868600  | 1.02313700  | 1.59228100  |
| F              | -1.50580700 | -0.33398000 | 1.77394300  |
| B              | 0.95531000  | 0.10039500  | -0.15559100 |
| C              | 1.36844100  | 1.63743500  | -0.70586400 |
| C              | 2.04285000  | -1.09114900 | -0.56646600 |
| C              | -0.49362900 | -0.30180700 | -0.94454100 |
| C              | 2.60070200  | 2.03715600  | -1.27867100 |
| C              | 0.45064400  | 2.70925100  | -0.57466100 |
| C              | 2.62362700  | -2.03245700 | 0.31189000  |
| C              | 2.41520900  | -1.30563300 | -1.91819500 |
| H              | -1.10276600 | 0.60352900  | -1.12505800 |
| H              | -0.22403300 | -0.70935400 | -1.92851400 |
| C              | 2.87611100  | 3.34182900  | -1.73845800 |
| F              | 3.66600100  | 1.14137100  | -1.39264100 |
| C              | 0.67650400  | 4.02708900  | -1.01181200 |
| F              | -0.78861600 | 2.49858800  | 0.06545800  |
| C              | 3.52233700  | -3.04857500 | -0.07508700 |
| F              | 2.29489600  | -2.03656200 | 1.68132600  |
| C              | 3.30592800  | -2.29961100 | -2.36085300 |
| F              | 1.88584200  | -0.48338800 | -2.92496500 |
| C              | 1.90370000  | 4.34729700  | -1.61529700 |
| F              | 4.10926900  | 3.64674800  | -2.30138200 |
| F              | -0.29466400 | 5.00959800  | -0.84697300 |
| C              | 3.87737900  | -3.18077700 | -1.42616600 |
| F              | 4.04425700  | -3.92807800 | 0.86710200  |
| F              | 3.62538600  | -2.42046900 | -3.70793000 |
| F              | 2.15514800  | 5.63525800  | -2.06400100 |
| F              | 4.75722800  | -4.17179200 | -1.83413600 |
| C              | -4.02952300 | 0.19278400  | -3.29988900 |
| H              | -3.14445800 | 0.81210900  | -3.08819800 |
| H              | -3.67853000 | -0.84583400 | -3.41420000 |
| H              | -4.44137700 | 0.51223800  | -4.26664000 |
| C              | -5.33316600 | -0.13053900 | 1.65791600  |
| H              | -5.00860100 | -1.17408300 | 1.80095100  |
| H              | -4.50802800 | 0.51770600  | 1.99423300  |
| H              | -6.18657800 | 0.04403700  | 2.32680300  |
| Frequencies -- | 8.3806      | 14.3885     | 18.6306     |
| Frequencies -- | 24.6338     | 27.7926     | 29.9924     |
| Frequencies -- | 33.5324     | 38.8360     | 42.0006     |
| Frequencies -- | 43.1147     | 54.0279     | 61.7723     |
| Frequencies -- | 78.1632     | 89.9893     | 91.1028     |
| Frequencies -- | 108.2257    | 109.3509    | 112.6151    |
| Frequencies -- | 116.6400    | 121.2665    | 125.8919    |
| Frequencies -- | 134.1710    | 137.9946    | 143.0934    |
| Frequencies -- | 146.7920    | 148.1576    | 155.7350    |
| Frequencies -- | 158.4962    | 165.1752    | 170.0290    |
| Frequencies -- | 176.7627    | 202.9945    | 211.0205    |
| Frequencies -- | 216.2035    | 221.1267    | 223.4507    |
| Frequencies -- | 223.9838    | 247.3496    | 260.4325    |



|                |           |           |           |
|----------------|-----------|-----------|-----------|
| Frequencies -- | 263.9927  | 264.5722  | 265.0374  |
| Frequencies -- | 269.3291  | 275.3970  | 278.6199  |
| Frequencies -- | 283.4259  | 302.2460  | 303.8678  |
| Frequencies -- | 310.4105  | 312.7573  | 324.1505  |
| Frequencies -- | 330.0257  | 333.3186  | 337.2020  |
| Frequencies -- | 345.7596  | 356.8971  | 361.0328  |
| Frequencies -- | 374.3876  | 377.2310  | 379.6580  |
| Frequencies -- | 380.8313  | 395.7784  | 427.6843  |
| Frequencies -- | 431.0518  | 431.9687  | 444.7412  |
| Frequencies -- | 454.3324  | 459.1099  | 468.7669  |
| Frequencies -- | 489.4304  | 511.9924  | 524.4151  |
| Frequencies -- | 540.8036  | 544.9541  | 546.0588  |
| Frequencies -- | 549.2394  | 552.1305  | 560.5113  |
| Frequencies -- | 565.8479  | 570.3073  | 580.4835  |
| Frequencies -- | 588.7036  | 608.9024  | 624.7474  |
| Frequencies -- | 634.9763  | 637.4276  | 642.4680  |
| Frequencies -- | 651.9679  | 675.8763  | 704.0600  |
| Frequencies -- | 716.6415  | 729.9145  | 737.5491  |
| Frequencies -- | 738.1415  | 741.6087  | 745.6610  |
| Frequencies -- | 749.5703  | 766.2591  | 785.8370  |
| Frequencies -- | 787.0671  | 790.7069  | 808.3067  |
| Frequencies -- | 822.5935  | 838.7292  | 839.7920  |
| Frequencies -- | 841.3941  | 864.7920  | 867.3842  |
| Frequencies -- | 873.1057  | 891.4095  | 907.2124  |
| Frequencies -- | 911.5146  | 912.8040  | 921.8575  |
| Frequencies -- | 932.2172  | 979.7695  | 989.2956  |
| Frequencies -- | 1003.4055 | 1006.9910 | 1024.0955 |
| Frequencies -- | 1027.9157 | 1033.0000 | 1034.6793 |
| Frequencies -- | 1046.0115 | 1049.8463 | 1050.3624 |
| Frequencies -- | 1055.1800 | 1057.2993 | 1057.4954 |
| Frequencies -- | 1081.2605 | 1089.5614 | 1098.5998 |
| Frequencies -- | 1107.6740 | 1126.1532 | 1193.4826 |
| Frequencies -- | 1204.2886 | 1210.2985 | 1211.9536 |
| Frequencies -- | 1216.1241 | 1278.7823 | 1282.4744 |
| Frequencies -- | 1287.8567 | 1295.8286 | 1315.0884 |
| Frequencies -- | 1319.8958 | 1337.5433 | 1343.1979 |
| Frequencies -- | 1348.4157 | 1363.2177 | 1391.1602 |
| Frequencies -- | 1393.8316 | 1398.5060 | 1412.3326 |
| Frequencies -- | 1417.3996 | 1420.0483 | 1421.0751 |
| Frequencies -- | 1421.6367 | 1427.5840 | 1442.2247 |
| Frequencies -- | 1452.0834 | 1466.8229 | 1469.1106 |
| Frequencies -- | 1472.3902 | 1472.7043 | 1487.1186 |
| Frequencies -- | 1491.1358 | 1500.8085 | 1504.4266 |
| Frequencies -- | 1589.7071 | 1592.9088 | 1595.3127 |
| Frequencies -- | 1604.9923 | 1606.9357 | 1616.5233 |
| Frequencies -- | 1619.7912 | 1630.6929 | 3009.9705 |
| Frequencies -- | 3010.8251 | 3014.3337 | 3091.5114 |
| Frequencies -- | 3098.0176 | 3116.3445 | 3132.3404 |
| Frequencies -- | 3135.2350 | 3164.9184 | 3176.2699 |
| Frequencies -- | 3195.9590 | 3233.0860 | 3240.4143 |
| Frequencies -- | 3258.6233 | 3269.0764 | 3299.8273 |

**7. Product for Transfer of (C<sub>6</sub>F<sub>5</sub>) from Counterion to Cation**  
[\(return to table of contents\)](#)

**MeB(C<sub>6</sub>F<sub>5</sub>)<sub>2</sub>:**

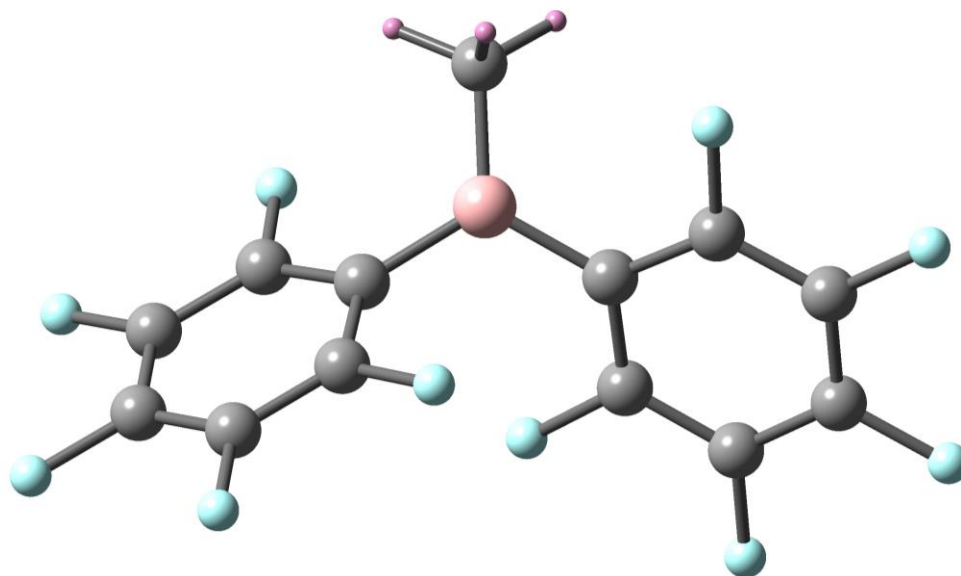

| <b>vacuum</b> | <b>toluene-like solvent</b> | <b>D3 dispersion</b> |
|---------------|-----------------------------|----------------------|
| -1520.0135385 | -1520.0186757               | -0.16707259          |

|   |             |             |             |
|---|-------------|-------------|-------------|
| C | -1.35755100 | 0.68328100  | 0.05969900  |
| C | -1.60999100 | -0.23184300 | 1.10488100  |
| C | -2.43145900 | 0.89034200  | -0.83363700 |
| C | -2.83982000 | -0.89355200 | 1.27616900  |
| C | -3.67103000 | 0.23439200  | -0.71652900 |
| C | -3.87590500 | -0.66070900 | 0.35121700  |
| C | 1.38014100  | 0.62512800  | -0.13207300 |
| C | 1.49452600  | -0.59792000 | -0.83916500 |
| C | 2.57243500  | 1.06150100  | 0.49746000  |
| C | 2.69144800  | -1.33106900 | -0.93737500 |
| C | 3.78360900  | 0.34695500  | 0.44673600  |
| C | 3.84313500  | -0.85603000 | -0.28211100 |
| C | 0.02977500  | 3.02914200  | -0.09351100 |
| H | 0.11096700  | 3.36993800  | 0.95840900  |
| H | 0.89043800  | 3.46609500  | -0.61926800 |
| H | -0.90124400 | 3.45200600  | -0.49160200 |
| F | 5.02644400  | -1.56486800 | -0.35621200 |
| F | 2.74720100  | -2.50892800 | -1.66393700 |
| F | 0.39012300  | -1.10803700 | -1.52292500 |
| F | 4.91185300  | 0.81254900  | 1.10162600  |
| F | 2.57077700  | 2.23429500  | 1.25139700  |
| F | -0.60679000 | -0.47987300 | 2.04776700  |
| F | -3.03886400 | -1.76666900 | 2.33350400  |
| F | -5.09000100 | -1.30769300 | 0.49152000  |
| F | -4.68391900 | 0.45693800  | -1.63545200 |
| F | -2.25956400 | 1.74704100  | -1.92389700 |

| B              | 0.02772600 | 1.45629300 | -0.07372500 |
|----------------|------------|------------|-------------|
| Frequencies -- | 20.3185    | 22.4177    | 33.8092     |
| Frequencies -- | 69.8310    | 102.6646   | 109.7817    |
| Frequencies -- | 118.9760   | 119.4981   | 139.0897    |
| Frequencies -- | 148.7524   | 155.7366   | 159.8440    |
| Frequencies -- | 203.9793   | 209.3464   | 243.5343    |
| Frequencies -- | 264.8176   | 265.6732   | 266.9414    |
| Frequencies -- | 270.6820   | 291.1855   | 296.8552    |
| Frequencies -- | 305.7112   | 318.2450   | 341.0396    |
| Frequencies -- | 348.3788   | 380.8053   | 381.8448    |
| Frequencies -- | 421.4750   | 426.2756   | 428.6976    |
| Frequencies -- | 451.5372   | 476.2155   | 487.5305    |
| Frequencies -- | 538.9839   | 548.9824   | 603.9927    |
| Frequencies -- | 632.1362   | 637.5879   | 639.8504    |
| Frequencies -- | 645.6480   | 714.9270   | 723.6949    |
| Frequencies -- | 750.5596   | 765.7275   | 800.1397    |
| Frequencies -- | 871.3759   | 880.1244   | 912.2828    |
| Frequencies -- | 923.7562   | 1004.8692  | 1020.6272   |
| Frequencies -- | 1069.0653  | 1070.7835  | 1133.7470   |
| Frequencies -- | 1138.7273  | 1244.3903  | 1257.8786   |
| Frequencies -- | 1346.5666  | 1348.2202  | 1352.0650   |
| Frequencies -- | 1354.9044  | 1361.5383  | 1432.8788   |
| Frequencies -- | 1436.2103  | 1452.8787  | 1470.7408   |
| Frequencies -- | 1472.8815  | 1483.9851  | 1593.6206   |
| Frequencies -- | 1596.6725  | 1619.8323  | 1623.8456   |
| Frequencies -- | 2991.9250  | 3097.5038  | 3158.7282   |

**Catalyst 1:**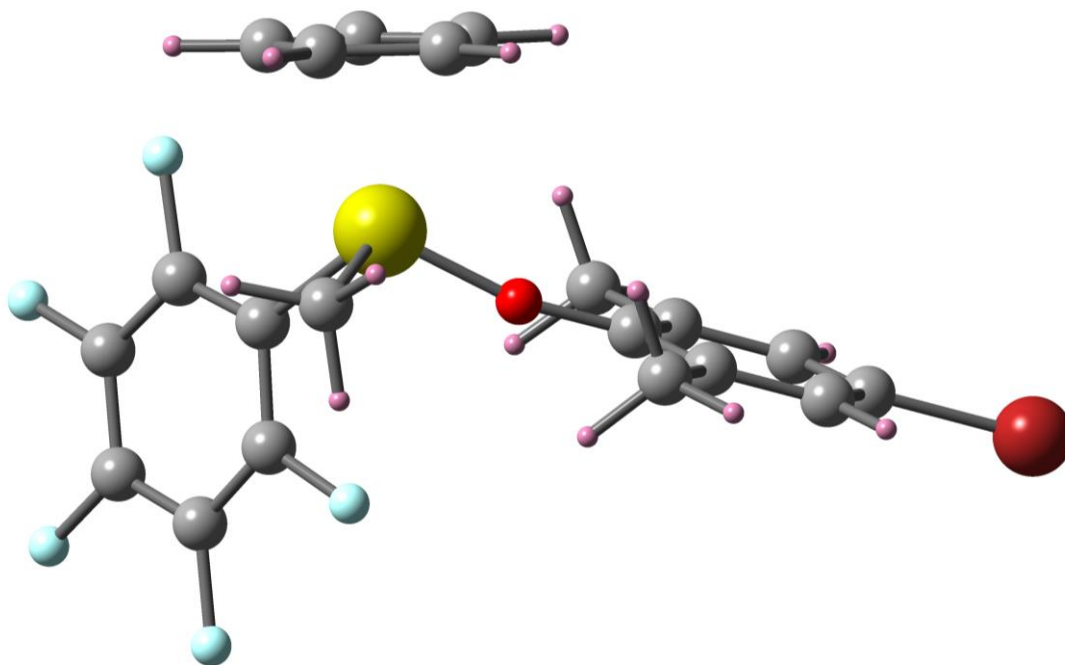

| <b>vacuum</b> | <b>toluene-like solvent</b> | <b>D3 dispersion</b> |
|---------------|-----------------------------|----------------------|
| -1417.0793931 | -1417.0865283               | -0.2890719           |

|    |             |             |             |
|----|-------------|-------------|-------------|
| Ti | -1.11038400 | 1.55761500  | 0.38483100  |
| C  | -1.42942400 | 2.02227400  | 2.39743300  |
| H  | -1.19760500 | 1.08376600  | 2.92845100  |
| H  | -0.79904900 | 2.83239000  | 2.79368700  |
| H  | -2.49046600 | 2.28534100  | 2.54885900  |
| O  | 0.48192600  | 0.75180200  | 0.40987600  |
| C  | 1.77565100  | 0.30913600  | 0.19171300  |
| C  | 2.06074400  | -0.47078700 | -0.96817500 |
| C  | 2.77818100  | 0.62297300  | 1.15625900  |
| C  | 3.38805600  | -0.91983800 | -1.15991300 |
| C  | 4.09333300  | 0.15714300  | 0.92833800  |
| C  | 4.38616100  | -0.60013700 | -0.22099200 |
| H  | 3.62797200  | -1.51922200 | -2.03749500 |
| H  | 4.87417300  | 0.38459200  | 1.65312500  |
| H  | -1.91161500 | 2.03207800  | -2.57710700 |
| C  | -1.64952800 | 2.63958700  | -1.71832400 |
| C  | -2.57627400 | 3.17171400  | -0.75440500 |
| C  | -0.33133500 | 3.06289200  | -1.34752100 |
| H  | -3.65097400 | 3.03093100  | -0.76486800 |
| C  | -1.82826400 | 3.91814900  | 0.21096600  |
| H  | 0.59033200  | 2.82479100  | -1.87002500 |
| C  | -0.43937300 | 3.84273600  | -0.14795400 |
| H  | -2.23537000 | 4.44221700  | 1.06893800  |
| H  | 0.38554900  | 4.29518000  | 0.39586600  |
| F  | -4.95195000 | -3.64605200 | 0.07123000  |
| C  | -4.15604200 | -2.51145400 | 0.08068700  |
| C  | -4.40672300 | -1.45915400 | -0.81794200 |

|    |             |             |             |
|----|-------------|-------------|-------------|
| C  | -3.08493900 | -2.39975600 | 0.98568100  |
| C  | -3.58433900 | -0.31362800 | -0.78660500 |
| F  | -5.45916400 | -1.56532900 | -1.72181700 |
| C  | -2.29871600 | -1.23197800 | 0.96471100  |
| F  | -2.82357800 | -3.43519100 | 1.87630900  |
| C  | -2.49868900 | -0.13429000 | 0.09693700  |
| F  | -3.91605900 | 0.67233900  | -1.73386100 |
| F  | -1.23871900 | -1.20063600 | 1.89257400  |
| C  | 0.97965400  | -0.83648100 | -1.97000100 |
| H  | 0.14809400  | -1.36636100 | -1.48203700 |
| H  | 0.55356400  | 0.05601300  | -2.45386200 |
| H  | 1.37963100  | -1.48651900 | -2.75976400 |
| C  | 2.45255100  | 1.42079400  | 2.40594300  |
| H  | 2.10002400  | 2.43440300  | 2.15744900  |
| H  | 1.65397700  | 0.93598700  | 2.98679500  |
| H  | 3.33554200  | 1.51950200  | 3.05176800  |
| Br | 6.22658300  | -1.23521700 | -0.51445700 |

|                |           |           |           |
|----------------|-----------|-----------|-----------|
| Frequencies -- | 12.7597   | 13.7820   | 26.2258   |
| Frequencies -- | 36.0799   | 58.4308   | 66.6703   |
| Frequencies -- | 73.8907   | 83.9601   | 93.5320   |
| Frequencies -- | 100.3043  | 111.4845  | 120.2379  |
| Frequencies -- | 129.0005  | 133.5256  | 150.2068  |
| Frequencies -- | 151.8927  | 170.0402  | 182.5254  |
| Frequencies -- | 196.6042  | 201.5519  | 212.6616  |
| Frequencies -- | 225.0265  | 230.4228  | 236.2291  |
| Frequencies -- | 244.3760  | 248.8656  | 265.3550  |
| Frequencies -- | 270.6756  | 272.5307  | 301.4475  |
| Frequencies -- | 321.0893  | 341.3411  | 343.2672  |
| Frequencies -- | 361.5855  | 382.1749  | 394.8634  |
| Frequencies -- | 427.8558  | 430.7851  | 460.5328  |
| Frequencies -- | 500.0446  | 507.7591  | 510.2226  |
| Frequencies -- | 544.2892  | 561.8791  | 565.6397  |
| Frequencies -- | 570.1391  | 572.4520  | 577.9466  |
| Frequencies -- | 593.4439  | 599.1002  | 640.9069  |
| Frequencies -- | 682.3833  | 690.5579  | 723.0615  |
| Frequencies -- | 734.3698  | 743.5456  | 792.2832  |
| Frequencies -- | 800.9952  | 806.6989  | 811.3879  |
| Frequencies -- | 841.1846  | 842.3786  | 880.3019  |
| Frequencies -- | 885.0216  | 887.5430  | 891.4351  |
| Frequencies -- | 902.5949  | 929.8664  | 951.4331  |
| Frequencies -- | 1001.5981 | 1012.4962 | 1028.2642 |
| Frequencies -- | 1034.5978 | 1044.6095 | 1051.3259 |
| Frequencies -- | 1054.4537 | 1057.8004 | 1089.7199 |
| Frequencies -- | 1093.6467 | 1122.2380 | 1132.0851 |
| Frequencies -- | 1177.9133 | 1193.3814 | 1225.7743 |
| Frequencies -- | 1261.5556 | 1281.2686 | 1281.6236 |
| Frequencies -- | 1289.5288 | 1343.0339 | 1355.1414 |
| Frequencies -- | 1391.0764 | 1397.0845 | 1401.9659 |
| Frequencies -- | 1413.8350 | 1422.0130 | 1425.9943 |
| Frequencies -- | 1431.3218 | 1434.8056 | 1444.2047 |
| Frequencies -- | 1446.0180 | 1449.4334 | 1458.0268 |
| Frequencies -- | 1485.1992 | 1486.4277 | 1501.1204 |
| Frequencies -- | 1502.7130 | 1588.1106 | 1589.2973 |
| Frequencies -- | 1591.9252 | 1599.6309 | 2986.9492 |
| Frequencies -- | 3018.9429 | 3022.9212 | 3105.8717 |
| Frequencies -- | 3108.4796 | 3108.8090 | 3126.7023 |
| Frequencies -- | 3136.2553 | 3136.7272 | 3197.8422 |
| Frequencies -- | 3199.9416 | 3234.5038 | 3250.0657 |
| Frequencies -- | 3261.8089 | 3270.0220 | 3288.4257 |

**Catalyst 2:**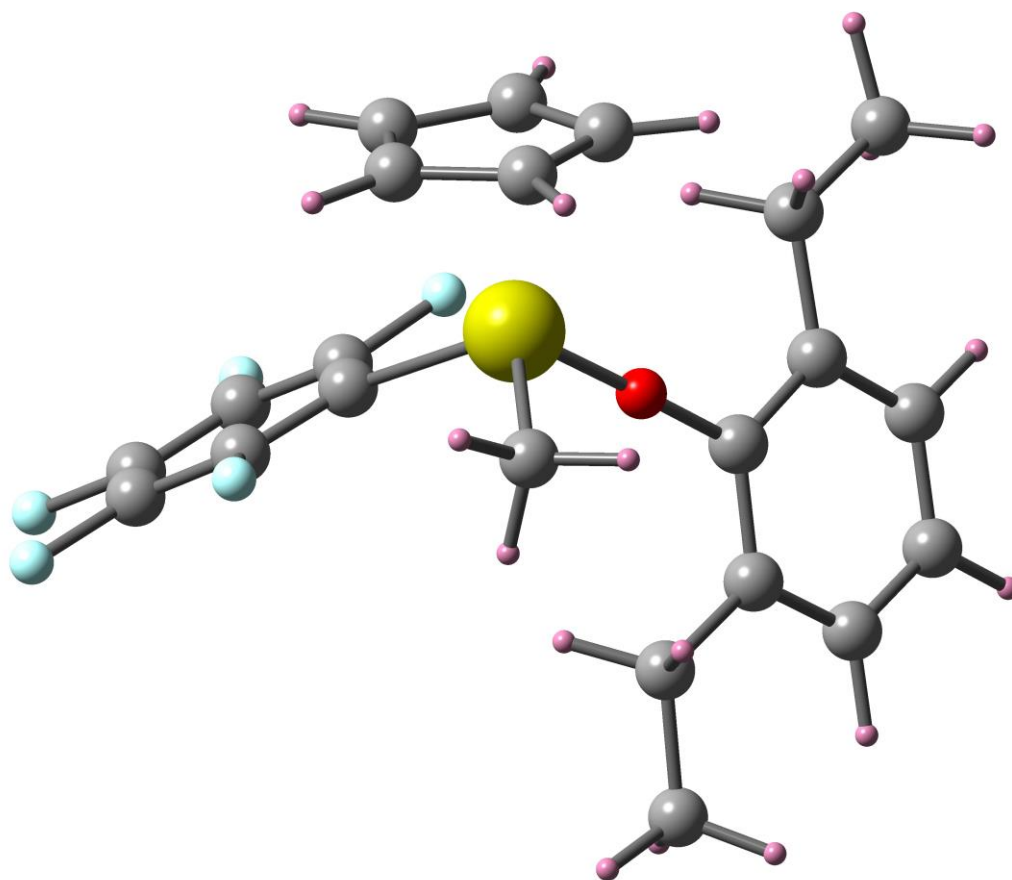

| <b>vacuum</b> | <b>toluene-like solvent</b> | <b>D3 dispersion</b> |
|---------------|-----------------------------|----------------------|
| -1483.0972185 | -1483.10384                 | -0.31652233          |

|    |             |             |             |
|----|-------------|-------------|-------------|
| Ti | 0.01508300  | 1.43481300  | 0.63650400  |
| C  | -0.07569000 | 1.51760900  | 2.72532600  |
| H  | -0.29359700 | 0.47154700  | 3.00375500  |
| H  | 0.89683700  | 1.80910200  | 3.15611200  |
| H  | -0.86783300 | 2.16934400  | 3.11697000  |
| O  | 1.39703800  | 0.32182800  | 0.45170600  |
| C  | 2.45372600  | -0.57822700 | 0.30139300  |
| C  | 3.39064400  | -0.38269300 | -0.76035400 |
| C  | 2.54171300  | -1.67792500 | 1.21123000  |
| C  | 4.44861400  | -1.31365900 | -0.87517400 |
| C  | 3.61939500  | -2.57717200 | 1.04142200  |
| C  | 4.56740000  | -2.39764200 | 0.01574200  |
| H  | 5.18429800  | -1.19778100 | -1.66953500 |
| H  | 3.71939600  | -3.42891600 | 1.71233400  |
| C  | 0.20516000  | 2.99028100  | -1.16088700 |
| C  | -1.18604600 | 3.05160100  | -0.81098700 |
| C  | 0.96230400  | 3.50118500  | -0.04915100 |
| C  | -1.29032300 | 3.59875100  | 0.50953100  |
| C  | 0.03286900  | 3.87838200  | 0.98081800  |
| C  | -1.58899200 | 0.14983900  | -0.07770800 |

|                |             |             |             |
|----------------|-------------|-------------|-------------|
| C              | -2.78536100 | -0.05759300 | 0.62859300  |
| C              | -1.47864900 | -0.57854000 | -1.27475500 |
| C              | -3.80198500 | -0.94077900 | 0.21378200  |
| F              | -3.01525300 | 0.65230400  | 1.82531300  |
| C              | -2.45840500 | -1.47394300 | -1.74482200 |
| F              | -0.33685400 | -0.41140200 | -2.08336900 |
| C              | -3.63162100 | -1.65760200 | -0.98644500 |
| F              | -4.96395300 | -1.11270600 | 0.95997800  |
| F              | -2.29383000 | -2.17132500 | -2.93777500 |
| F              | -4.61491200 | -2.53455500 | -1.42248000 |
| C              | 3.22298500  | 0.78613400  | -1.73033500 |
| H              | 3.23009600  | 1.72498900  | -1.15227500 |
| C              | 1.49925800  | -1.85853600 | 2.31474000  |
| H              | 0.49611600  | -1.79217200 | 1.86194700  |
| H              | 5.39244900  | -3.10464200 | -0.09345800 |
| C              | 4.26115500  | 0.90355100  | -2.86730900 |
| H              | 5.28400800  | 1.03884500  | -2.48188000 |
| H              | 4.25476400  | 0.01782900  | -3.52152600 |
| H              | 4.02472200  | 1.77858200  | -3.49351600 |
| C              | 1.57911700  | -3.16099200 | 3.14133900  |
| H              | 0.75947300  | -3.17881600 | 3.87693200  |
| H              | 1.47842300  | -4.05633200 | 2.50792700  |
| H              | 2.52469800  | -3.24032200 | 3.70029000  |
| H              | 0.60658600  | 2.62575600  | -2.09997300 |
| H              | -2.01264400 | 2.73651400  | -1.43908300 |
| H              | 2.04129200  | 3.61168800  | -0.00239200 |
| H              | -2.20944200 | 3.73567100  | 1.07231400  |
| H              | 0.29244500  | 4.29321400  | 1.94927100  |
| H              | 1.57113800  | -1.00193100 | 3.00451900  |
| H              | 2.21824200  | 0.71429500  | -2.17641600 |
| Frequencies -- | 15.3400     | 20.7781     | 26.9452     |
| Frequencies -- | 41.2441     | 50.3814     | 56.0512     |
| Frequencies -- | 77.1726     | 82.3119     | 85.7321     |
| Frequencies -- | 95.0454     | 104.1028    | 114.8494    |
| Frequencies -- | 126.4171    | 134.9575    | 145.8932    |
| Frequencies -- | 154.2832    | 176.2590    | 186.8515    |
| Frequencies -- | 193.9885    | 204.8831    | 206.2208    |
| Frequencies -- | 216.3818    | 244.6917    | 253.2715    |
| Frequencies -- | 263.6303    | 265.2153    | 267.3395    |
| Frequencies -- | 279.5433    | 292.8430    | 295.3664    |
| Frequencies -- | 303.7644    | 322.0663    | 324.1986    |
| Frequencies -- | 341.4332    | 354.4693    | 367.0000    |
| Frequencies -- | 384.9447    | 389.4587    | 426.8813    |
| Frequencies -- | 463.3968    | 507.8751    | 512.3993    |
| Frequencies -- | 533.2279    | 543.4060    | 548.7360    |
| Frequencies -- | 563.9498    | 573.4752    | 580.2734    |
| Frequencies -- | 582.9375    | 596.8636    | 603.1251    |
| Frequencies -- | 635.2979    | 681.2263    | 689.8956    |
| Frequencies -- | 719.7376    | 731.4704    | 732.2075    |
| Frequencies -- | 738.1350    | 770.6552    | 792.0754    |
| Frequencies -- | 797.2895    | 804.0108    | 807.3573    |
| Frequencies -- | 829.1817    | 841.2500    | 842.7368    |
| Frequencies -- | 854.9712    | 881.7394    | 887.4665    |
| Frequencies -- | 908.7141    | 919.0161    | 931.7758    |
| Frequencies -- | 987.7598    | 994.5603    | 997.1099    |
| Frequencies -- | 1025.8694   | 1030.6061   | 1033.0076   |
| Frequencies -- | 1042.9775   | 1057.8545   | 1090.0443   |
| Frequencies -- | 1091.5044   | 1094.6786   | 1101.2621   |

|                |           |           |           |
|----------------|-----------|-----------|-----------|
| Frequencies -- | 1105.0416 | 1124.4787 | 1129.8316 |
| Frequencies -- | 1176.5929 | 1194.1284 | 1197.9105 |
| Frequencies -- | 1202.3265 | 1264.2360 | 1276.8009 |
| Frequencies -- | 1284.5985 | 1290.7971 | 1291.2780 |
| Frequencies -- | 1294.6718 | 1326.0903 | 1347.2483 |
| Frequencies -- | 1355.3359 | 1384.1991 | 1391.1185 |
| Frequencies -- | 1400.5875 | 1403.1032 | 1412.6601 |
| Frequencies -- | 1414.1167 | 1433.3185 | 1436.1866 |
| Frequencies -- | 1438.2967 | 1446.4690 | 1449.3428 |
| Frequencies -- | 1453.7040 | 1471.8694 | 1487.0645 |
| Frequencies -- | 1497.4919 | 1500.4427 | 1500.8056 |
| Frequencies -- | 1504.7863 | 1509.1167 | 1589.8673 |
| Frequencies -- | 1600.5977 | 1602.4551 | 1610.5812 |
| Frequencies -- | 2989.7769 | 3010.9963 | 3011.3636 |
| Frequencies -- | 3022.0659 | 3026.3581 | 3070.2369 |
| Frequencies -- | 3076.1673 | 3105.0977 | 3111.9467 |
| Frequencies -- | 3113.5493 | 3119.2263 | 3119.4982 |
| Frequencies -- | 3146.8014 | 3166.6911 | 3200.1211 |
| Frequencies -- | 3209.3799 | 3239.2395 | 3246.7376 |
| Frequencies -- | 3261.8117 | 3265.7337 | 3284.7180 |



**Catalyst 3:**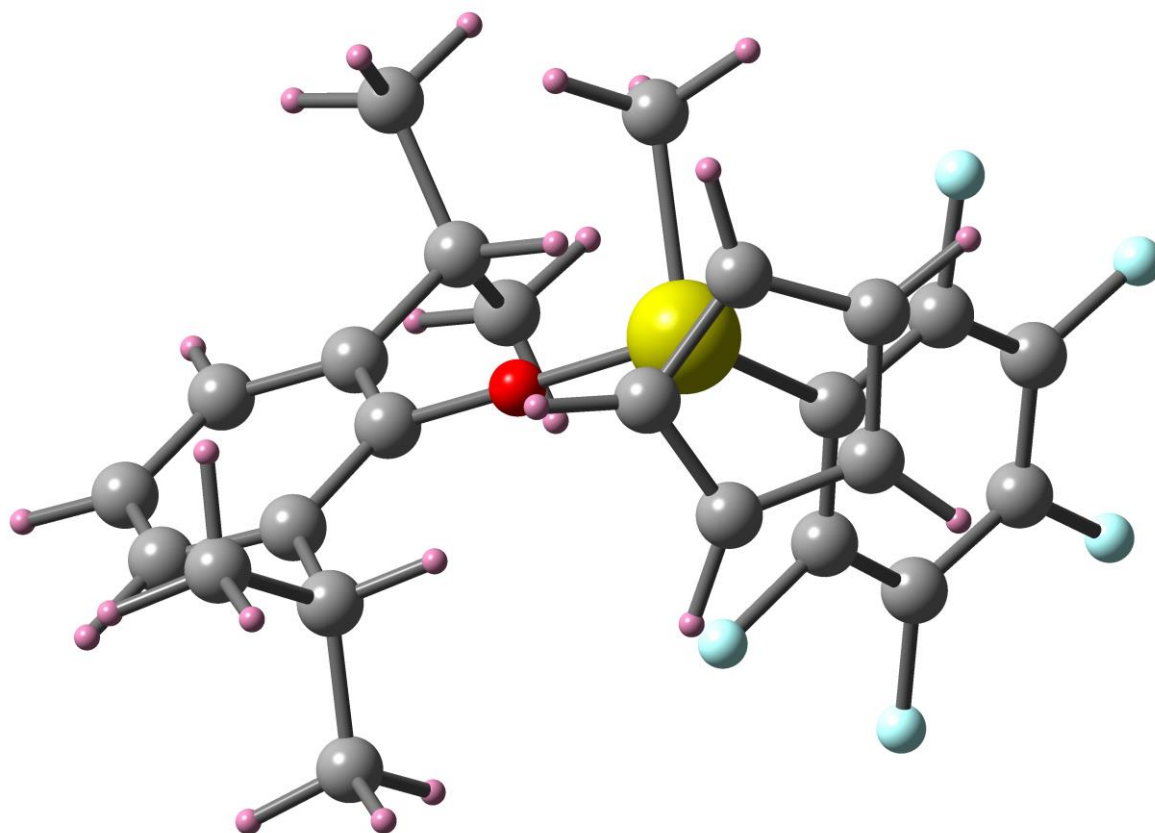

| <b>vacuum</b> | <b>toluene-like solvent</b> | <b>D3 dispersion</b> |
|---------------|-----------------------------|----------------------|
| -1561.6739622 | -1561.6801413               | -0.35471845          |

|    |             |             |             |
|----|-------------|-------------|-------------|
| Ti | 0.00419900  | 1.40964200  | -0.74669700 |
| C  | 0.02376200  | 1.30918000  | -2.83649700 |
| H  | 0.27004100  | 0.25357700  | -3.04829900 |
| H  | -0.97619300 | 1.52862300  | -3.24749700 |
| H  | 0.77239600  | 1.95942100  | -3.30945100 |
| O  | -1.25842400 | 0.18899600  | -0.44511500 |
| C  | -2.22816500 | -0.79447300 | -0.23019200 |
| C  | -3.36417500 | -0.49707500 | 0.58641400  |
| C  | -2.04532600 | -2.07877400 | -0.83638700 |
| C  | -4.33602000 | -1.51117500 | 0.75384700  |
| C  | -3.05403500 | -3.04912600 | -0.62954100 |
| C  | -4.19263100 | -2.77334800 | 0.14935800  |
| H  | -5.21412900 | -1.31104200 | 1.36935600  |
| H  | -2.94295700 | -4.03571500 | -1.08113300 |
| C  | 1.05961700  | 3.24274900  | 0.55858100  |
| C  | 1.14277200  | 3.67839900  | -0.80475400 |
| C  | -0.32746900 | 3.09739400  | 0.89850200  |
| C  | -0.18940200 | 3.80978800  | -1.31154300 |
| C  | -1.10351400 | 3.44725900  | -0.26286600 |
| C  | 1.71432300  | 0.35687200  | 0.08248400  |

|   |             |             |             |
|---|-------------|-------------|-------------|
| C | 2.92168000  | 0.17885700  | -0.61143600 |
| C | 1.67082500  | -0.23596400 | 1.35601800  |
| C | 4.01646800  | -0.55339600 | -0.11109800 |
| F | 3.07768700  | 0.76445900  | -1.88559300 |
| C | 2.72990300  | -0.97857300 | 1.91247200  |
| F | 0.51728600  | -0.08339200 | 2.15091200  |
| C | 3.91402800  | -1.13947500 | 1.16554100  |
| F | 5.18820600  | -0.70405800 | -0.84661900 |
| F | 2.63220600  | -1.54927000 | 3.17824000  |
| F | 4.97434600  | -1.86776900 | 1.68693600  |
| C | -3.54332300 | 0.85488700  | 1.29086300  |
| H | -2.69609400 | 1.48850500  | 1.01180000  |
| C | -0.80758700 | -2.43532300 | -1.67316300 |
| H | -0.13709800 | -1.56841700 | -1.67441200 |
| H | -4.95744200 | -3.53945300 | 0.29209900  |
| C | -4.83595300 | 1.58957800  | 0.83127000  |
| H | -4.85138200 | 1.71949900  | -0.26272800 |
| H | -5.74471400 | 1.03690500  | 1.11393800  |
| H | -4.89580800 | 2.58672500  | 1.29784000  |
| C | -3.49790000 | 0.70021500  | 2.83970100  |
| H | -2.56129600 | 0.21793000  | 3.15938300  |
| H | -3.55881600 | 1.68840200  | 3.32507000  |
| H | -4.33538700 | 0.09217400  | 3.21426300  |
| C | -0.00774100 | -3.61580400 | -1.04752100 |
| H | 0.91963500  | -3.78859300 | -1.61753900 |
| H | 0.26718900  | -3.39904800 | -0.00366500 |
| H | -0.58338000 | -4.55394500 | -1.05493400 |
| C | -1.17709500 | -2.73168400 | -3.15603700 |
| H | -1.71211000 | -1.88298800 | -3.60933600 |
| H | -0.26499200 | -2.91581600 | -3.74666100 |
| H | -1.81928900 | -3.62134500 | -3.24575800 |
| H | 1.89784900  | 3.05281300  | 1.22058900  |
| H | 2.05805600  | 3.84044700  | -1.36748800 |
| H | -0.71364600 | 2.77889300  | 1.86127600  |
| H | -0.46465500 | 4.11653700  | -2.31524900 |
| H | -2.18657900 | 3.46615100  | -0.33220000 |

|                |          |          |          |
|----------------|----------|----------|----------|
| Frequencies -- | 14.4043  | 19.8655  | 25.1319  |
| Frequencies -- | 32.5892  | 39.5895  | 50.3358  |
| Frequencies -- | 57.4882  | 67.1004  | 71.7603  |
| Frequencies -- | 81.1752  | 93.8330  | 112.6811 |
| Frequencies -- | 120.5658 | 124.1197 | 127.1317 |
| Frequencies -- | 141.6763 | 153.1043 | 164.0819 |
| Frequencies -- | 175.8003 | 197.9345 | 202.2918 |
| Frequencies -- | 209.7340 | 222.8907 | 225.4459 |
| Frequencies -- | 236.0295 | 239.5447 | 242.3176 |
| Frequencies -- | 248.6411 | 256.1828 | 263.9305 |
| Frequencies -- | 264.9690 | 270.6872 | 287.6717 |
| Frequencies -- | 295.0141 | 303.4373 | 314.1341 |
| Frequencies -- | 317.0730 | 339.2190 | 341.9176 |
| Frequencies -- | 382.6718 | 387.0092 | 424.0653 |
| Frequencies -- | 426.2065 | 430.5950 | 434.7042 |
| Frequencies -- | 463.5297 | 512.5961 | 541.3230 |
| Frequencies -- | 543.0457 | 546.3775 | 565.9266 |
| Frequencies -- | 576.5448 | 582.4885 | 597.6367 |
| Frequencies -- | 602.4092 | 610.3857 | 630.2069 |
| Frequencies -- | 635.9235 | 682.3069 | 690.7930 |
| Frequencies -- | 726.7109 | 732.7358 | 740.2379 |
| Frequencies -- | 766.0266 | 788.0384 | 797.6666 |

|                |           |           |           |
|----------------|-----------|-----------|-----------|
| Frequencies -- | 798.9709  | 812.5665  | 816.9755  |
| Frequencies -- | 841.1321  | 842.1814  | 878.2420  |
| Frequencies -- | 882.3435  | 886.7079  | 916.5814  |
| Frequencies -- | 925.2020  | 932.2913  | 932.6991  |
| Frequencies -- | 935.9698  | 941.7880  | 962.7054  |
| Frequencies -- | 964.6380  | 988.8714  | 996.6592  |
| Frequencies -- | 1030.5783 | 1033.4766 | 1042.4809 |
| Frequencies -- | 1056.6624 | 1073.0607 | 1089.8353 |
| Frequencies -- | 1094.6654 | 1117.3603 | 1119.8005 |
| Frequencies -- | 1121.1261 | 1129.6034 | 1166.5946 |
| Frequencies -- | 1181.1352 | 1185.2472 | 1194.2781 |
| Frequencies -- | 1198.5320 | 1204.5771 | 1260.9948 |
| Frequencies -- | 1280.2681 | 1285.0697 | 1294.4342 |
| Frequencies -- | 1307.7657 | 1333.2759 | 1334.9591 |
| Frequencies -- | 1336.7314 | 1356.4474 | 1385.0863 |
| Frequencies -- | 1390.3123 | 1398.8880 | 1399.7346 |
| Frequencies -- | 1400.0639 | 1404.6185 | 1417.3782 |
| Frequencies -- | 1418.1467 | 1431.7734 | 1437.9882 |
| Frequencies -- | 1442.8690 | 1445.8108 | 1450.1426 |
| Frequencies -- | 1453.0885 | 1475.4321 | 1487.7766 |
| Frequencies -- | 1488.2052 | 1489.5236 | 1490.0359 |
| Frequencies -- | 1500.0327 | 1500.9267 | 1506.4735 |
| Frequencies -- | 1507.3753 | 1590.6981 | 1599.3677 |
| Frequencies -- | 1600.7084 | 1608.3998 | 2988.9199 |
| Frequencies -- | 3004.1923 | 3006.2269 | 3008.6856 |
| Frequencies -- | 3010.2896 | 3097.2456 | 3102.2708 |
| Frequencies -- | 3102.9072 | 3105.5314 | 3106.0523 |
| Frequencies -- | 3111.2227 | 3114.8773 | 3115.6370 |
| Frequencies -- | 3118.2893 | 3133.2478 | 3142.5735 |
| Frequencies -- | 3146.7513 | 3162.1419 | 3180.9811 |
| Frequencies -- | 3195.9152 | 3238.3260 | 3247.7609 |
| Frequencies -- | 3260.6200 | 3264.6881 | 3282.0196 |

**Catalyst 4:**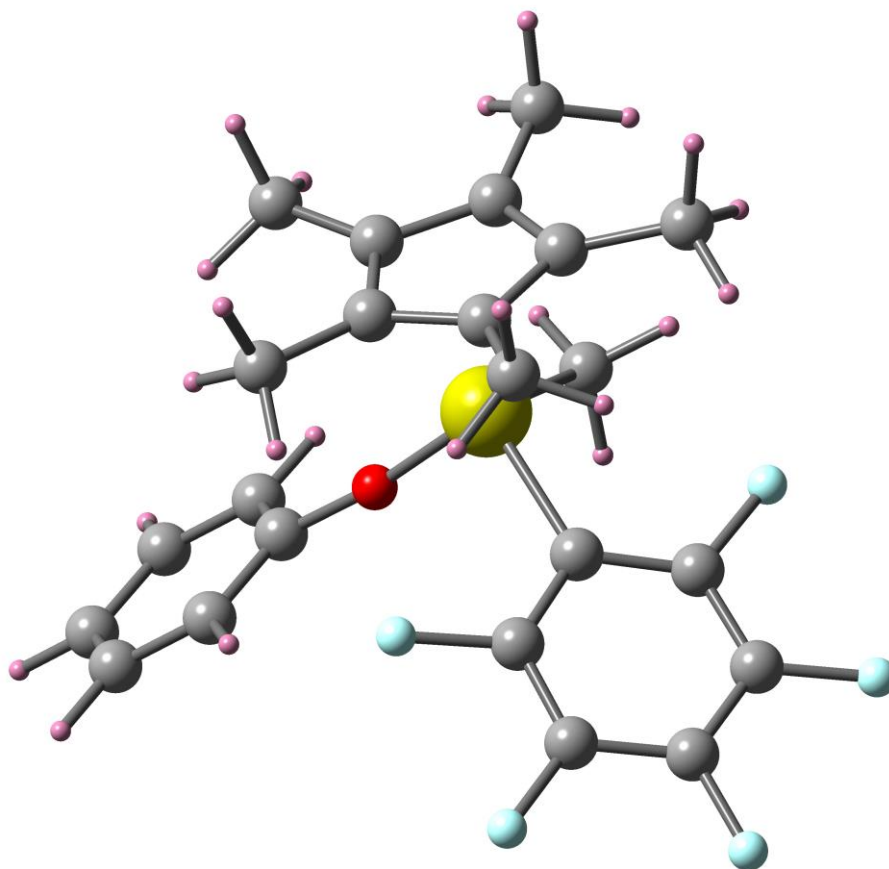

| <b>vacuum</b> | <b>toluene-like solvent</b> | <b>D3 dispersion</b> |
|---------------|-----------------------------|----------------------|
| -1522.4092783 | -1522.4148206               | -0.33465636          |

|    |             |             |             |
|----|-------------|-------------|-------------|
| Ti | -0.53826000 | 0.72159400  | -0.40909600 |
| C  | -0.71675500 | 1.31311700  | -2.40483900 |
| H  | -0.39110100 | 0.39720200  | -2.93570800 |
| H  | -1.75239800 | 1.54161300  | -2.70145000 |
| H  | -0.05766500 | 2.14850800  | -2.67962200 |
| O  | -1.61975600 | -0.69863300 | -0.52052700 |
| C  | -2.56703800 | -1.70289900 | -0.54193300 |
| C  | -2.48483900 | -2.77969300 | 0.37689000  |
| C  | -3.60579200 | -1.66468800 | -1.50715200 |
| C  | -3.44814600 | -3.80806200 | 0.32853700  |
| C  | -4.56219400 | -2.69976300 | -1.54386500 |
| C  | -4.48941600 | -3.77349500 | -0.62711800 |
| H  | -3.38030800 | -4.63860800 | 1.03512700  |
| H  | -5.35984000 | -2.66855300 | -2.28988700 |
| C  | 0.16797400  | 2.05087200  | 1.54840700  |
| C  | 0.10945400  | 2.98757400  | 0.45016900  |
| C  | -1.16360900 | 1.51961900  | 1.75350500  |
| C  | -1.25196700 | 3.04496200  | -0.02318600 |
| C  | -2.04083000 | 2.12929400  | 0.77867700  |
| C  | 1.43042800  | -0.22886500 | -0.21303000 |

|   |             |             |             |
|---|-------------|-------------|-------------|
| C | 2.52824100  | 0.10576900  | -1.02437100 |
| C | 1.66384900  | -1.31021700 | 0.65251600  |
| C | 3.76221000  | -0.57512800 | -1.01122200 |
| F | 2.42954900  | 1.19447400  | -1.91640800 |
| C | 2.86982800  | -2.03402500 | 0.71635500  |
| F | 0.64967300  | -1.71593000 | 1.54900600  |
| C | 3.93107200  | -1.66068000 | -0.13076200 |
| F | 4.81194200  | -0.19385600 | -1.84292200 |
| F | 3.03523200  | -3.09781200 | 1.60042200  |
| F | 5.13500700  | -2.35100300 | -0.09169700 |
| C | 1.35536300  | 1.82662200  | 2.45686400  |
| H | 1.36699000  | 2.59408300  | 3.25092800  |
| H | 1.32094300  | 0.84748300  | 2.95076500  |
| H | 2.31126500  | 1.89866500  | 1.92147700  |
| C | 1.25084200  | 3.84555900  | -0.04598300 |
| H | 1.25283000  | 4.81680000  | 0.48043400  |
| H | 2.22854200  | 3.37821900  | 0.12764200  |
| H | 1.17440900  | 4.05923600  | -1.12079000 |
| C | -1.58850100 | 0.60995100  | 2.88472800  |
| H | -0.80661000 | -0.11109000 | 3.15488400  |
| H | -1.81124000 | 1.20895600  | 3.78543200  |
| H | -2.49496000 | 0.03975300  | 2.64173200  |
| C | -1.79698300 | 4.04034600  | -1.02066100 |
| H | -2.03983500 | 4.98728200  | -0.50709600 |
| H | -1.07476600 | 4.27614000  | -1.81332000 |
| H | -2.71776200 | 3.68701800  | -1.50337900 |
| C | -3.54230000 | 1.95908200  | 0.70809400  |
| H | -3.86250900 | 0.95900400  | 1.02837800  |
| H | -4.03852500 | 2.69065100  | 1.37000000  |
| H | -3.93298800 | 2.12273700  | -0.30576000 |
| H | -5.23080700 | -4.57423600 | -0.66013300 |
| H | -1.67208700 | -2.80446800 | 1.10081900  |
| H | -3.64978100 | -0.83677700 | -2.21549400 |

|                |          |          |          |
|----------------|----------|----------|----------|
| Frequencies -- | 17.8103  | 22.3830  | 26.5543  |
| Frequencies -- | 34.4749  | 42.4156  | 46.8339  |
| Frequencies -- | 73.8585  | 79.9381  | 84.7706  |
| Frequencies -- | 100.7680 | 108.4580 | 117.3708 |
| Frequencies -- | 123.7542 | 128.8055 | 129.0616 |
| Frequencies -- | 137.9208 | 149.0607 | 151.3977 |
| Frequencies -- | 157.0225 | 163.8321 | 166.3964 |
| Frequencies -- | 171.1841 | 197.6575 | 203.3420 |
| Frequencies -- | 207.4456 | 224.9388 | 246.3325 |
| Frequencies -- | 264.6370 | 266.9111 | 286.3683 |
| Frequencies -- | 291.0357 | 293.8512 | 298.0051 |
| Frequencies -- | 302.8341 | 309.0444 | 315.4084 |
| Frequencies -- | 332.6540 | 347.3689 | 383.5872 |
| Frequencies -- | 385.3582 | 389.8176 | 410.5900 |
| Frequencies -- | 411.7014 | 427.7829 | 448.5847 |
| Frequencies -- | 461.8218 | 508.4197 | 514.1576 |
| Frequencies -- | 536.3675 | 540.3104 | 542.9378 |
| Frequencies -- | 555.6452 | 572.2379 | 583.0414 |
| Frequencies -- | 596.0409 | 603.5947 | 615.1675 |
| Frequencies -- | 615.3523 | 633.7297 | 644.1746 |
| Frequencies -- | 682.7431 | 689.2642 | 693.4600 |
| Frequencies -- | 723.2268 | 730.1470 | 762.8250 |
| Frequencies -- | 803.0353 | 804.1882 | 839.5077 |
| Frequencies -- | 884.0121 | 917.9688 | 920.3408 |
| Frequencies -- | 968.5824 | 970.0231 | 974.5401 |

|                |           |           |           |
|----------------|-----------|-----------|-----------|
| Frequencies -- | 994.1337  | 994.7652  | 1011.2342 |
| Frequencies -- | 1030.3970 | 1037.6206 | 1043.6963 |
| Frequencies -- | 1044.2298 | 1048.0648 | 1050.4693 |
| Frequencies -- | 1051.1141 | 1086.4784 | 1087.9382 |
| Frequencies -- | 1088.2816 | 1124.0240 | 1172.3487 |
| Frequencies -- | 1173.5040 | 1177.1941 | 1181.1676 |
| Frequencies -- | 1189.4569 | 1191.3704 | 1256.4205 |
| Frequencies -- | 1288.1635 | 1324.6916 | 1355.1391 |
| Frequencies -- | 1373.8343 | 1396.8259 | 1411.2140 |
| Frequencies -- | 1412.8646 | 1422.8786 | 1424.6997 |
| Frequencies -- | 1426.6010 | 1429.6644 | 1431.1349 |
| Frequencies -- | 1431.5278 | 1437.6681 | 1450.3587 |
| Frequencies -- | 1453.3542 | 1454.0950 | 1457.9504 |
| Frequencies -- | 1462.0758 | 1480.0046 | 1486.5373 |
| Frequencies -- | 1489.8312 | 1491.1790 | 1497.3141 |
| Frequencies -- | 1499.0207 | 1504.9614 | 1506.9435 |
| Frequencies -- | 1511.5891 | 1512.9380 | 1515.6615 |
| Frequencies -- | 1589.2849 | 1594.5638 | 1600.2533 |
| Frequencies -- | 1610.0043 | 2974.1685 | 3004.0568 |
| Frequencies -- | 3005.3264 | 3006.6297 | 3007.4109 |
| Frequencies -- | 3008.6807 | 3092.9540 | 3097.0245 |
| Frequencies -- | 3098.1258 | 3100.2979 | 3101.0213 |
| Frequencies -- | 3102.4692 | 3135.8020 | 3138.8940 |
| Frequencies -- | 3140.5232 | 3143.0241 | 3146.0300 |
| Frequencies -- | 3148.1054 | 3159.2913 | 3168.1987 |
| Frequencies -- | 3188.2505 | 3200.6373 | 3222.2991 |

**Catalyst 5:**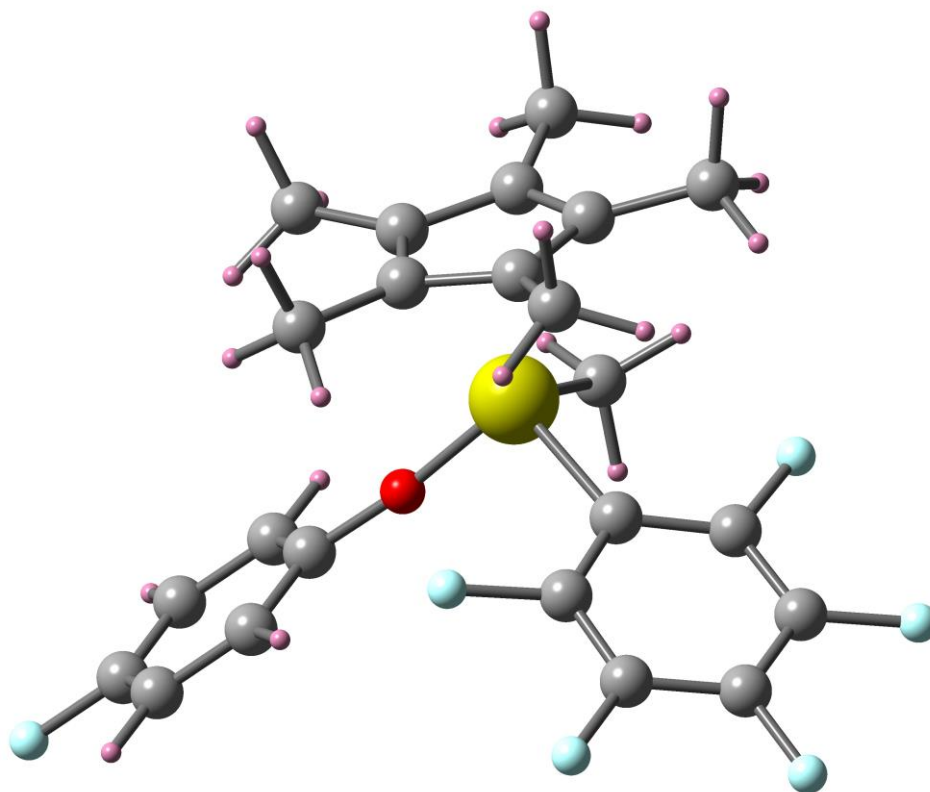

| <b>vacuum</b> | <b>toluene-like solvent</b> | <b>D3 dispersion</b> |
|---------------|-----------------------------|----------------------|
| -1621.6351131 | -1621.6413084               | -0.33518621          |

|    |             |             |             |
|----|-------------|-------------|-------------|
| Ti | -0.09611500 | 0.94774400  | -0.40634500 |
| C  | -0.13218100 | 1.52898400  | -2.41144000 |
| H  | -0.10516100 | 0.54847400  | -2.92590500 |
| H  | -1.05731300 | 2.05193500  | -2.70008400 |
| H  | 0.74076700  | 2.12403400  | -2.71410400 |
| O  | -1.54606800 | -0.10467500 | -0.46896200 |
| C  | -2.73412800 | -0.80240400 | -0.44795000 |
| C  | -2.91403900 | -1.87785300 | 0.46011500  |
| C  | -3.76550100 | -0.45738500 | -1.35992200 |
| C  | -4.12286100 | -2.60117600 | 0.46062900  |
| C  | -4.97583100 | -1.17805600 | -1.36238700 |
| C  | -5.12971800 | -2.23509100 | -0.44894300 |
| H  | -4.28187300 | -3.43348800 | 1.14615000  |
| H  | -5.78052900 | -0.93215300 | -2.05514100 |
| C  | 0.97782600  | 2.03961700  | 1.53248300  |
| C  | 1.21165600  | 2.92283400  | 0.41332500  |
| C  | -0.45276800 | 1.94505900  | 1.73538400  |
| C  | -0.06603200 | 3.38530900  | -0.07228300 |
| C  | -1.09890500 | 2.77291000  | 0.74088800  |
| C  | 1.51211800  | -0.52789200 | -0.21275100 |
| C  | 2.64034600  | -0.55381300 | -1.05102200 |
| C  | 1.43409700  | -1.61063800 | 0.67840900  |
| C  | 3.61657600  | -1.57051800 | -1.03664600 |

|   |             |             |             |
|---|-------------|-------------|-------------|
| F | 2.84683800  | 0.49122300  | -1.97549600 |
| C | 2.37169100  | -2.65858200 | 0.74523600  |
| F | 0.36302500  | -1.67762900 | 1.59841500  |
| C | 3.47645400  | -2.63672200 | -0.12791400 |
| F | 4.71109900  | -1.53826900 | -1.89626400 |
| F | 2.23271800  | -3.70308900 | 1.65594200  |
| F | 4.42145700  | -3.65251400 | -0.08765900 |
| C | 2.03821600  | 1.48621300  | 2.45688100  |
| H | 2.27374200  | 2.23039600  | 3.23816500  |
| H | 1.71100000  | 0.57194100  | 2.96764100  |
| H | 2.97521100  | 1.26044800  | 1.93105700  |
| C | 2.56274600  | 3.37645800  | -0.09027600 |
| H | 2.86699300  | 4.30564600  | 0.42371100  |
| H | 3.34634500  | 2.63022800  | 0.09316000  |
| H | 2.55601200  | 3.58824400  | -1.16802400 |
| C | -1.14044600 | 1.23044000  | 2.87720300  |
| H | -0.59629800 | 0.33091600  | 3.19169900  |
| H | -1.20862200 | 1.89891000  | 3.75355500  |
| H | -2.16418300 | 0.92605600  | 2.62116300  |
| C | -0.27680200 | 4.47841100  | -1.09390600 |
| H | -0.23132100 | 5.46456500  | -0.59921400 |
| H | 0.49277300  | 4.47134000  | -1.87686400 |
| H | -1.25469100 | 4.40693300  | -1.58835900 |
| C | -2.57978400 | 3.07189000  | 0.66351500  |
| H | -3.19439000 | 2.22063800  | 0.98500500  |
| H | -2.82896600 | 3.92214900  | 1.32269100  |
| H | -2.89731300 | 3.34720400  | -0.35183500 |
| H | -2.11051700 | -2.14219200 | 1.14438900  |
| H | -3.61047100 | 0.36351500  | -2.05973900 |
| F | -6.33897200 | -2.95712900 | -0.44822700 |

|                |           |           |           |
|----------------|-----------|-----------|-----------|
| Frequencies -- | 17.9844   | 20.2330   | 31.2162   |
| Frequencies -- | 35.2652   | 40.3422   | 43.9063   |
| Frequencies -- | 79.1887   | 82.4325   | 93.2578   |
| Frequencies -- | 100.3056  | 104.4231  | 111.3395  |
| Frequencies -- | 116.2143  | 119.6844  | 126.0433  |
| Frequencies -- | 127.4160  | 146.9820  | 150.4537  |
| Frequencies -- | 155.9316  | 162.4661  | 167.3506  |
| Frequencies -- | 170.2708  | 187.2188  | 200.7518  |
| Frequencies -- | 205.7035  | 223.5248  | 236.5582  |
| Frequencies -- | 262.6979  | 264.6817  | 269.7142  |
| Frequencies -- | 284.7859  | 292.1234  | 293.8300  |
| Frequencies -- | 298.8359  | 301.0182  | 306.2179  |
| Frequencies -- | 323.1248  | 345.6287  | 359.6235  |
| Frequencies -- | 364.1669  | 384.4356  | 391.7456  |
| Frequencies -- | 398.5387  | 408.6517  | 419.3352  |
| Frequencies -- | 427.7692  | 458.8431  | 463.1580  |
| Frequencies -- | 507.7119  | 515.2500  | 536.6222  |
| Frequencies -- | 540.2556  | 543.1726  | 555.2689  |
| Frequencies -- | 560.7934  | 571.4644  | 583.0462  |
| Frequencies -- | 595.7940  | 605.5110  | 614.1561  |
| Frequencies -- | 633.3739  | 633.8991  | 669.0389  |
| Frequencies -- | 688.0191  | 706.9460  | 723.8657  |
| Frequencies -- | 730.2676  | 789.1212  | 802.8536  |
| Frequencies -- | 804.2598  | 812.2237  | 837.0223  |
| Frequencies -- | 884.3412  | 917.3986  | 948.8954  |
| Frequencies -- | 965.8155  | 967.1481  | 970.9687  |
| Frequencies -- | 994.9568  | 1015.9663 | 1037.8394 |
| Frequencies -- | 1043.0031 | 1044.8372 | 1048.5670 |



|                |           |           |           |
|----------------|-----------|-----------|-----------|
| Frequencies -- | 1050.6214 | 1050.9833 | 1086.4388 |
| Frequencies -- | 1087.5790 | 1112.1201 | 1123.8630 |
| Frequencies -- | 1168.3704 | 1170.4985 | 1173.3991 |
| Frequencies -- | 1177.1379 | 1190.6949 | 1201.1896 |
| Frequencies -- | 1267.4146 | 1288.7439 | 1306.4767 |
| Frequencies -- | 1354.5334 | 1357.6107 | 1396.6696 |
| Frequencies -- | 1411.2643 | 1413.2428 | 1421.9744 |
| Frequencies -- | 1423.7235 | 1423.9794 | 1426.9424 |
| Frequencies -- | 1430.1876 | 1431.4685 | 1431.6725 |
| Frequencies -- | 1436.5148 | 1450.6957 | 1454.3271 |
| Frequencies -- | 1457.7679 | 1462.6538 | 1479.5597 |
| Frequencies -- | 1490.8102 | 1491.3935 | 1497.7066 |
| Frequencies -- | 1498.5126 | 1499.3978 | 1505.0109 |
| Frequencies -- | 1506.5023 | 1511.7946 | 1513.3026 |
| Frequencies -- | 1515.1453 | 1588.6781 | 1599.3381 |
| Frequencies -- | 1600.5439 | 1618.1233 | 2974.4905 |
| Frequencies -- | 3005.4436 | 3005.9255 | 3007.2318 |
| Frequencies -- | 3008.6210 | 3009.6921 | 3093.9361 |
| Frequencies -- | 3096.4726 | 3099.8044 | 3101.3037 |
| Frequencies -- | 3101.4737 | 3103.0967 | 3136.1660 |
| Frequencies -- | 3139.1590 | 3141.5592 | 3143.2672 |
| Frequencies -- | 3146.2489 | 3149.2778 | 3194.3817 |
| Frequencies -- | 3203.6817 | 3213.9082 | 3232.4838 |

**Catalyst 6:**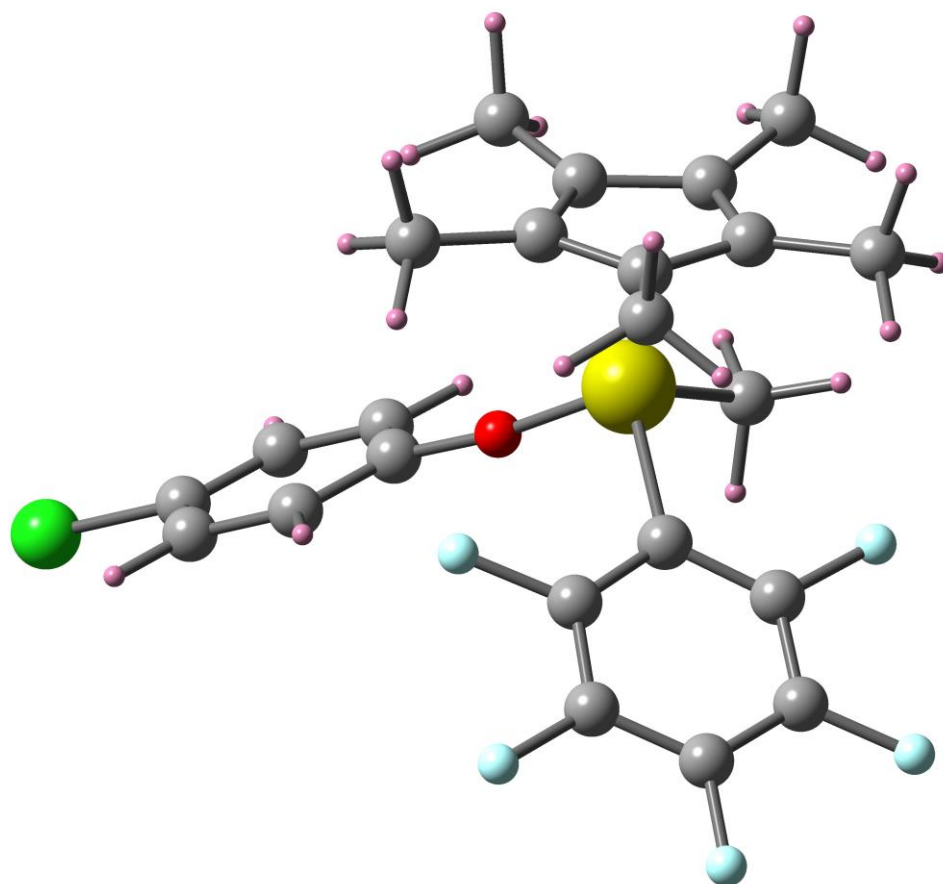

| <b>vacuum</b> | <b>toluene-like solvent</b> | <b>D3 dispersion</b> |
|---------------|-----------------------------|----------------------|
| -1536.7652958 | -1536.7712049               | -0.34217504          |

|    |             |             |             |
|----|-------------|-------------|-------------|
| Ti | 0.29728500  | 1.00344900  | -0.40213800 |
| C  | 0.34109200  | 1.56878400  | -2.41163800 |
| H  | 0.19842300  | 0.59392800  | -2.91781800 |
| H  | -0.48355700 | 2.23884100  | -2.70061800 |
| H  | 1.30070100  | 2.00475000  | -2.72350800 |
| O  | -1.30767700 | 0.20371200  | -0.44234300 |
| C  | -2.59906700 | -0.27239600 | -0.40183800 |
| C  | -2.95455800 | -1.29444900 | 0.51493000  |
| C  | -3.56668200 | 0.24660600  | -1.30023300 |
| C  | -4.27387000 | -1.78885800 | 0.53529900  |
| C  | -4.88510300 | -0.24947700 | -1.27825700 |
| C  | -5.22861300 | -1.25963900 | -0.35677000 |
| H  | -4.54977500 | -2.57607600 | 1.23686200  |
| H  | -5.63028600 | 0.14580200  | -1.96854500 |
| C  | 1.55115700  | 1.91327800  | 1.51777000  |
| C  | 1.91770400  | 2.74313300  | 0.39296600  |
| C  | 0.12654100  | 2.05648600  | 1.73386400  |
| C  | 0.72920100  | 3.40436100  | -0.08671300 |
| C  | -0.38338500 | 2.97326700  | 0.73833200  |
| C  | 1.64968800  | -0.71160700 | -0.21095400 |

|    |             |             |             |
|----|-------------|-------------|-------------|
| C  | 2.75704100  | -0.90784700 | -1.05412100 |
| C  | 1.40808200  | -1.77185700 | 0.67791700  |
| C  | 3.56315600  | -2.06390700 | -1.04922900 |
| F  | 3.11891600  | 0.09857600  | -1.97368900 |
| C  | 2.17230900  | -2.95284300 | 0.73582000  |
| F  | 0.34425600  | -1.67530600 | 1.60343600  |
| C  | 3.26268400  | -3.09913900 | -0.14355800 |
| F  | 4.64529500  | -2.19892600 | -1.91443200 |
| F  | 1.87781000  | -3.96712700 | 1.64356400  |
| F  | 4.03777700  | -4.24996500 | -0.11190500 |
| C  | 2.51517000  | 1.19669000  | 2.43568600  |
| H  | 2.89062500  | 1.89848300  | 3.20137400  |
| H  | 2.04245200  | 0.36017400  | 2.96549600  |
| H  | 3.38908900  | 0.80393200  | 1.89948500  |
| C  | 3.32200500  | 2.97046000  | -0.11797200 |
| H  | 3.79252000  | 3.80821500  | 0.42708200  |
| H  | 3.96354300  | 2.09082500  | 0.02078900  |
| H  | 3.33969900  | 3.22608500  | -1.18580200 |
| C  | -0.65711600 | 1.46932300  | 2.88621200  |
| H  | -0.27422900 | 0.48729800  | 3.19201300  |
| H  | -0.59271200 | 2.13648500  | 3.76380100  |
| H  | -1.72219800 | 1.34991600  | 2.64714400  |
| C  | 0.68594300  | 4.51428100  | -1.11063100 |
| H  | 0.88171300  | 5.48287600  | -0.61786200 |
| H  | 1.44341700  | 4.39043400  | -1.89563400 |
| H  | -0.29301200 | 4.59204500  | -1.60201000 |
| C  | -1.79327300 | 3.51640100  | 0.66386700  |
| H  | -2.52960200 | 2.82560100  | 1.09464300  |
| H  | -1.86323700 | 4.46328900  | 1.22760100  |
| H  | -2.10369000 | 3.73158700  | -0.36836700 |
| H  | -2.20381900 | -1.69868200 | 1.19118900  |
| H  | -3.28433700 | 1.02243400  | -2.01168900 |
| Cl | -6.93927700 | -1.90325900 | -0.32806600 |

|                |          |          |          |
|----------------|----------|----------|----------|
| Frequencies -- | 17.4010  | 18.6230  | 27.1690  |
| Frequencies -- | 32.6660  | 42.0159  | 47.0478  |
| Frequencies -- | 76.9190  | 80.7869  | 86.7470  |
| Frequencies -- | 98.1690  | 107.6336 | 112.5217 |
| Frequencies -- | 120.3409 | 121.0529 | 127.7086 |
| Frequencies -- | 134.0962 | 136.2043 | 148.9845 |
| Frequencies -- | 155.3764 | 156.3020 | 162.8727 |
| Frequencies -- | 169.4284 | 172.2524 | 202.8898 |
| Frequencies -- | 205.1098 | 211.2825 | 223.7426 |
| Frequencies -- | 248.5791 | 264.5701 | 266.4315 |
| Frequencies -- | 271.5192 | 281.0360 | 290.6843 |
| Frequencies -- | 294.0909 | 295.4732 | 297.4982 |
| Frequencies -- | 302.3029 | 321.1834 | 325.9757 |
| Frequencies -- | 346.1261 | 375.8986 | 386.0137 |
| Frequencies -- | 388.5659 | 408.8274 | 412.1432 |
| Frequencies -- | 427.6434 | 451.9567 | 462.0200 |
| Frequencies -- | 468.3029 | 484.4782 | 510.7251 |
| Frequencies -- | 536.3386 | 539.8754 | 542.7987 |
| Frequencies -- | 555.1648 | 568.2356 | 583.3099 |
| Frequencies -- | 596.6513 | 607.3939 | 613.0536 |
| Frequencies -- | 627.9594 | 634.3639 | 638.2610 |
| Frequencies -- | 664.7691 | 688.7040 | 702.0035 |
| Frequencies -- | 724.3480 | 731.1749 | 783.3129 |
| Frequencies -- | 792.7834 | 802.4054 | 804.0180 |
| Frequencies -- | 884.4091 | 915.6304 | 931.1406 |

|                |           |           |           |
|----------------|-----------|-----------|-----------|
| Frequencies -- | 951.0158  | 967.3570  | 971.0688  |
| Frequencies -- | 994.7789  | 1013.2217 | 1038.5167 |
| Frequencies -- | 1042.8604 | 1044.0246 | 1048.5155 |
| Frequencies -- | 1049.1647 | 1051.7033 | 1073.4860 |
| Frequencies -- | 1086.4297 | 1088.1312 | 1114.6674 |
| Frequencies -- | 1123.6630 | 1172.9238 | 1174.3609 |
| Frequencies -- | 1176.5661 | 1189.2236 | 1191.2992 |
| Frequencies -- | 1263.6555 | 1289.3172 | 1307.5595 |
| Frequencies -- | 1350.6320 | 1355.7572 | 1397.9608 |
| Frequencies -- | 1410.8440 | 1412.4429 | 1414.3453 |
| Frequencies -- | 1423.3475 | 1424.3089 | 1427.4233 |
| Frequencies -- | 1430.5730 | 1432.3184 | 1433.3116 |
| Frequencies -- | 1438.4903 | 1450.5850 | 1454.5496 |
| Frequencies -- | 1458.1293 | 1462.2407 | 1480.0742 |
| Frequencies -- | 1486.7443 | 1490.3107 | 1491.8017 |
| Frequencies -- | 1497.8595 | 1498.9576 | 1504.4728 |
| Frequencies -- | 1507.2138 | 1510.5279 | 1511.5695 |
| Frequencies -- | 1517.3390 | 1580.1538 | 1589.8176 |
| Frequencies -- | 1600.6034 | 1604.7741 | 2974.6355 |
| Frequencies -- | 3005.7421 | 3005.9469 | 3007.3787 |
| Frequencies -- | 3008.2082 | 3009.5025 | 3093.7670 |
| Frequencies -- | 3095.0585 | 3100.1492 | 3101.2478 |
| Frequencies -- | 3101.6449 | 3102.9202 | 3135.9277 |
| Frequencies -- | 3138.6233 | 3141.8905 | 3142.9613 |
| Frequencies -- | 3146.5175 | 3148.5166 | 3192.1287 |
| Frequencies -- | 3198.8613 | 3211.9526 | 3229.6825 |

**Catalyst 7:**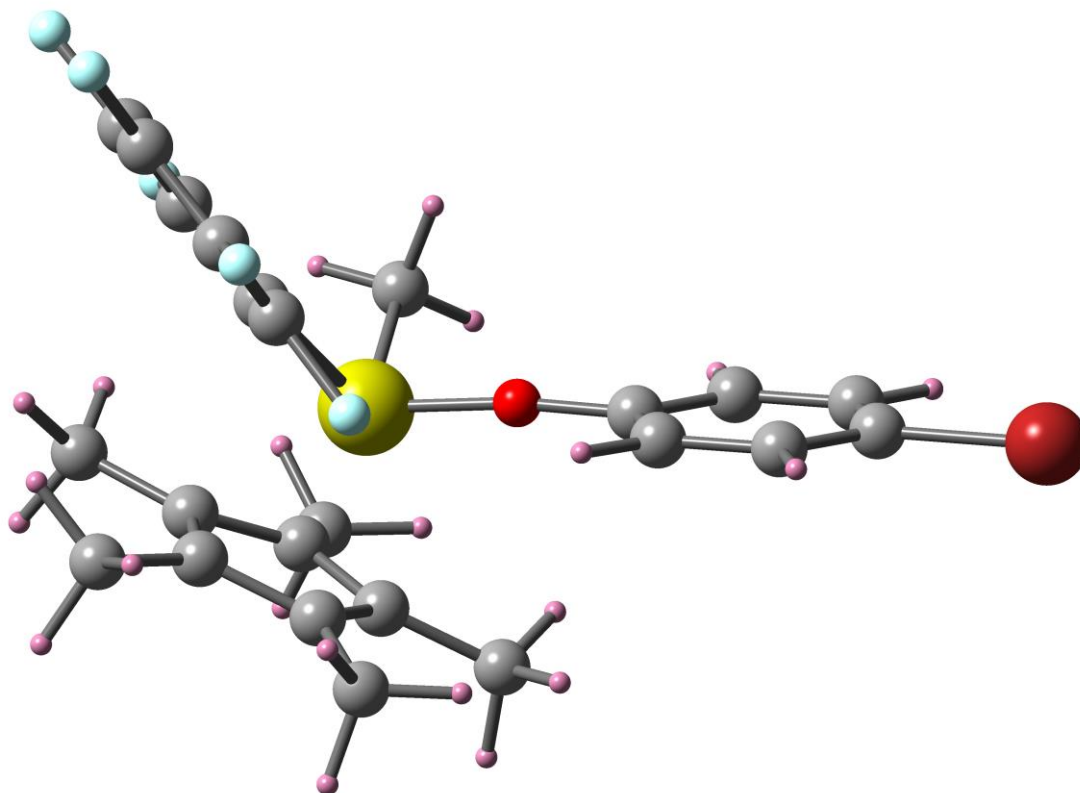

| <b>vacuum</b> | <b>toluene-like solvent</b> | <b>D3 dispersion</b> |
|---------------|-----------------------------|----------------------|
| -1534.9691189 | -1534.9748655               | -0.34314025          |

|    |             |             |             |
|----|-------------|-------------|-------------|
| Ti | -0.91245000 | -1.02868400 | -0.39678000 |
| C  | -1.00036100 | -1.57015500 | -2.41202600 |
| H  | -0.75109500 | -0.61228000 | -2.90915600 |
| H  | -0.24911300 | -2.32163700 | -2.70068400 |
| H  | -1.99809300 | -1.90024600 | -2.73398300 |
| O  | 0.77840100  | -0.43150200 | -0.41223000 |
| C  | 2.11778200  | -0.11897100 | -0.35290600 |
| C  | 2.59442200  | 0.81831300  | 0.59833700  |
| C  | 3.02151000  | -0.71789600 | -1.26722300 |
| C  | 3.96457100  | 1.14523100  | 0.64049600  |
| C  | 4.39187500  | -0.39221200 | -1.22613700 |
| C  | 4.85388800  | 0.53566300  | -0.26915800 |
| H  | 4.32478000  | 1.86872600  | 1.37219700  |
| H  | 5.08120900  | -0.85544600 | -1.93246900 |
| C  | -2.34275900 | -1.81267600 | 1.45270600  |
| C  | -2.71619500 | -2.61811900 | 0.31284700  |
| C  | -0.94915200 | -2.07739600 | 1.74922100  |
| C  | -1.56330600 | -3.38176300 | -0.09744900 |
| C  | -0.46564400 | -3.04302300 | 0.78778100  |
| C  | -2.04164200 | 0.84013200  | -0.21130800 |

|    |             |             |             |
|----|-------------|-------------|-------------|
| C  | -3.11368200 | 1.17768300  | -1.05551500 |
| C  | -1.67026400 | 1.86063600  | 0.67982900  |
| C  | -3.76684000 | 2.42657100  | -1.05017500 |
| F  | -3.59953400 | 0.22783600  | -1.97803500 |
| C  | -2.27777000 | 3.12941800  | 0.73769800  |
| F  | -0.63002000 | 1.62964900  | 1.60820200  |
| C  | -3.33913500 | 3.41455400  | -0.14295500 |
| F  | -4.82219500 | 2.69806700  | -1.91646600 |
| F  | -1.85762600 | 4.09691600  | 1.64699900  |
| F  | -3.96179200 | 4.65449700  | -0.11137200 |
| C  | -3.28795100 | -1.00639300 | 2.31436000  |
| H  | -3.74197800 | -1.65889100 | 3.08092900  |
| H  | -2.77632000 | -0.19188200 | 2.84251500  |
| H  | -4.10927500 | -0.56639500 | 1.73378300  |
| C  | -4.10214200 | -2.73145300 | -0.27988000 |
| H  | -4.65795800 | -3.55051000 | 0.21050000  |
| H  | -4.68922500 | -1.81382500 | -0.14764100 |
| H  | -4.07703800 | -2.95478800 | -1.35502600 |
| C  | -0.18362000 | -1.55195200 | 2.94286800  |
| H  | -0.49560100 | -0.53829500 | 3.22423800  |
| H  | -0.35511300 | -2.20489100 | 3.81678200  |
| H  | 0.89951600  | -1.52672700 | 2.76399300  |
| C  | -1.55791700 | -4.49584200 | -1.11777800 |
| H  | -1.90262800 | -5.43345400 | -0.64723700 |
| H  | -2.22601100 | -4.29290300 | -1.96508200 |
| H  | -0.55471400 | -4.68516500 | -1.52226400 |
| C  | 0.89463500  | -3.70464400 | 0.79078100  |
| H  | 1.65751200  | -3.08713800 | 1.28202600  |
| H  | 0.84827800  | -4.66345700 | 1.33655500  |
| H  | 1.25273100  | -3.92752100 | -0.22438500 |
| H  | 1.89619700  | 1.29024000  | 1.28699400  |
| H  | 2.65054900  | -1.42769900 | -2.00668600 |
| Br | 6.76853600  | 0.98915300  | -0.20483800 |

|                |          |          |          |
|----------------|----------|----------|----------|
| Frequencies -- | 14.6932  | 18.3562  | 26.7491  |
| Frequencies -- | 31.3197  | 39.0079  | 43.1723  |
| Frequencies -- | 74.9261  | 79.2083  | 91.0870  |
| Frequencies -- | 95.2962  | 107.0645 | 110.0804 |
| Frequencies -- | 114.6690 | 119.2701 | 127.0832 |
| Frequencies -- | 129.6777 | 138.4045 | 148.9807 |
| Frequencies -- | 155.4610 | 156.5788 | 162.3243 |
| Frequencies -- | 169.6533 | 174.9888 | 199.9041 |
| Frequencies -- | 204.6765 | 209.9011 | 218.3226 |
| Frequencies -- | 238.9158 | 251.5585 | 262.1198 |
| Frequencies -- | 265.2205 | 270.7500 | 290.2090 |
| Frequencies -- | 292.9732 | 294.5309 | 298.3094 |
| Frequencies -- | 302.8773 | 320.2689 | 343.9058 |
| Frequencies -- | 345.2692 | 375.2299 | 385.1011 |
| Frequencies -- | 388.9442 | 396.0529 | 414.2400 |
| Frequencies -- | 426.8467 | 433.5541 | 453.0282 |
| Frequencies -- | 462.3089 | 506.9614 | 511.7071 |
| Frequencies -- | 536.3415 | 540.4154 | 543.3144 |
| Frequencies -- | 555.3498 | 574.8866 | 582.7005 |
| Frequencies -- | 595.6798 | 605.2402 | 613.7921 |
| Frequencies -- | 629.3091 | 634.1169 | 660.9559 |
| Frequencies -- | 687.0451 | 695.5750 | 700.9978 |
| Frequencies -- | 723.8539 | 731.1872 | 802.7049 |
| Frequencies -- | 803.7770 | 823.0190 | 837.7360 |
| Frequencies -- | 884.4162 | 919.0568 | 956.5906 |

|                |           |           |           |
|----------------|-----------|-----------|-----------|
| Frequencies -- | 968.0422  | 970.0246  | 972.8235  |
| Frequencies -- | 995.2193  | 1019.9374 | 1038.0611 |
| Frequencies -- | 1041.8855 | 1044.4807 | 1047.6312 |
| Frequencies -- | 1049.0372 | 1049.6108 | 1063.3564 |
| Frequencies -- | 1085.9563 | 1087.5505 | 1114.5282 |
| Frequencies -- | 1123.3531 | 1172.4684 | 1175.6079 |
| Frequencies -- | 1177.1914 | 1190.3775 | 1192.2309 |
| Frequencies -- | 1264.6388 | 1288.8360 | 1306.9649 |
| Frequencies -- | 1347.4206 | 1354.2095 | 1396.1148 |
| Frequencies -- | 1407.4365 | 1409.6093 | 1413.7126 |
| Frequencies -- | 1422.4067 | 1424.5989 | 1426.2144 |
| Frequencies -- | 1429.9428 | 1431.5281 | 1432.8339 |
| Frequencies -- | 1438.1108 | 1450.4657 | 1454.7342 |
| Frequencies -- | 1457.7944 | 1462.4655 | 1479.3236 |
| Frequencies -- | 1481.9101 | 1490.6187 | 1491.4287 |
| Frequencies -- | 1497.1001 | 1498.7545 | 1504.3210 |
| Frequencies -- | 1505.3145 | 1510.9856 | 1512.5921 |
| Frequencies -- | 1516.4529 | 1576.1350 | 1588.5630 |
| Frequencies -- | 1599.2028 | 1600.7116 | 2974.9049 |
| Frequencies -- | 3005.4348 | 3005.8059 | 3007.4037 |
| Frequencies -- | 3008.4494 | 3009.5419 | 3093.8865 |
| Frequencies -- | 3094.1610 | 3099.4541 | 3100.9739 |
| Frequencies -- | 3101.8536 | 3103.3249 | 3135.2003 |
| Frequencies -- | 3138.9229 | 3141.9486 | 3143.4986 |
| Frequencies -- | 3146.7184 | 3148.6241 | 3188.5545 |
| Frequencies -- | 3196.5137 | 3207.8803 | 3227.3594 |

**Catalyst 8:**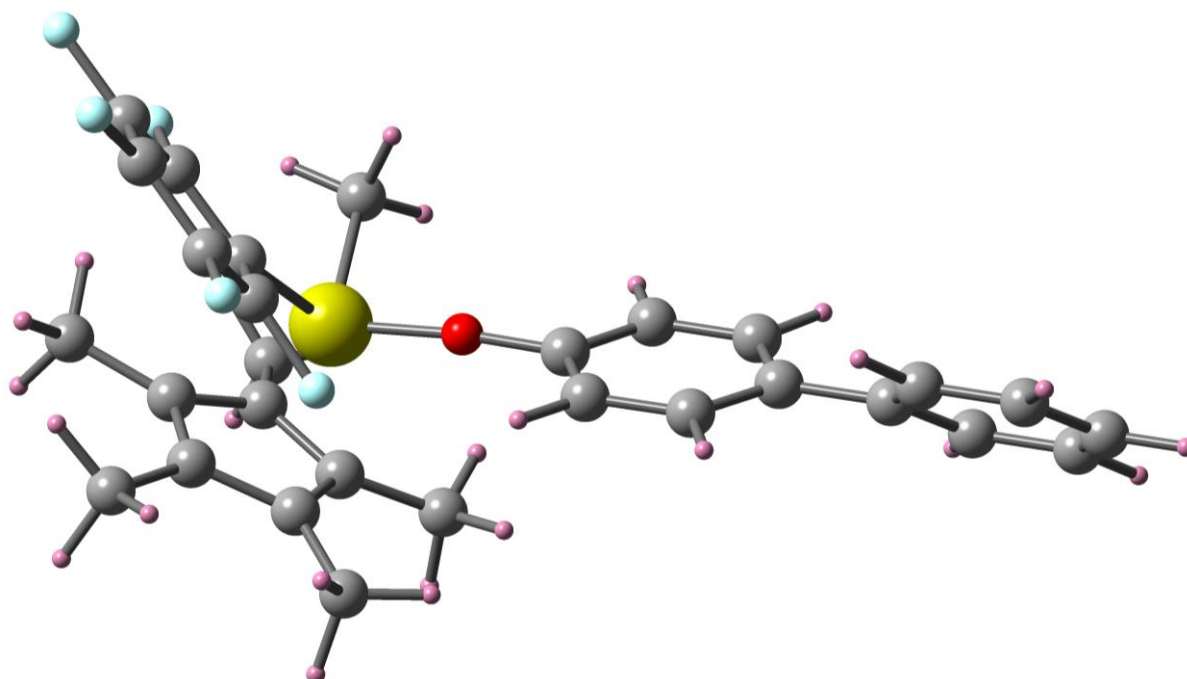

| <b>vacuum</b> | <b>toluene-like solvent</b> | <b>D3 dispersion</b> |
|---------------|-----------------------------|----------------------|
| -1753.3602178 | -1753.3674624               | -0.40963283          |

|    |             |             |             |
|----|-------------|-------------|-------------|
| Ti | -1.27650000 | -1.02869300 | -0.39746900 |
| C  | -1.38717500 | -1.58719000 | -2.40757100 |
| H  | -1.06158400 | -0.65824400 | -2.91520400 |
| H  | -0.68896100 | -2.39606500 | -2.67469900 |
| H  | -2.40199700 | -1.84844100 | -2.73887800 |
| O  | 0.44457100  | -0.53701100 | -0.40945500 |
| C  | 1.80174500  | -0.30055600 | -0.34892200 |
| C  | 2.32872000  | 0.62289400  | 0.58798500  |
| C  | 2.67729600  | -0.96264600 | -1.24597100 |
| C  | 3.71259800  | 0.86929300  | 0.62362900  |
| C  | 4.05920200  | -0.70580300 | -1.19649200 |
| C  | 4.61246200  | 0.21339300  | -0.26190000 |
| H  | 4.09934200  | 1.56435800  | 1.37055000  |
| H  | 4.71091700  | -1.20321400 | -1.91660700 |
| C  | -2.65876900 | -1.67925200 | 1.54434300  |
| C  | -3.21528800 | -2.39580500 | 0.42030700  |
| C  | -1.29228400 | -2.12252800 | 1.72482400  |
| C  | -2.20475200 | -3.28992700 | -0.09091000 |
| C  | -1.00966900 | -3.11564500 | 0.71165800  |
| C  | -2.28758800 | 0.91030600  | -0.23127500 |
| C  | -3.32365500 | 1.31592500  | -1.09003800 |
| C  | -1.86130900 | 1.90468000  | 0.66463700  |
| C  | -3.89602400 | 2.60396500  | -1.09047300 |
| F  | -3.85554200 | 0.40084000  | -2.02229300 |
| C  | -2.38734600 | 3.20952000  | 0.71679400  |
| F  | -0.84848100 | 1.60677400  | 1.60376200  |
| C  | -3.41776700 | 3.56175400  | -0.17619600 |



|   |             |             |             |
|---|-------------|-------------|-------------|
| F | -4.92056200 | 2.94379400  | -1.97012300 |
| F | -1.91809000 | 4.14853300  | 1.63261600  |
| F | -3.96155500 | 4.83888700  | -0.15008800 |
| C | -3.42390300 | -0.78107600 | 2.48962100  |
| H | -3.91090500 | -1.39180400 | 3.27022700  |
| H | -2.77065200 | -0.06200500 | 2.99927300  |
| H | -4.21372500 | -0.21343900 | 1.98030200  |
| C | -4.64333200 | -2.31411800 | -0.06894600 |
| H | -5.24152000 | -3.13536500 | 0.36436900  |
| H | -5.12668500 | -1.37176800 | 0.21815000  |
| H | -4.71492700 | -2.40094200 | -1.16179800 |
| C | -0.37686800 | -1.72729500 | 2.86195400  |
| H | -0.53104100 | -0.68710000 | 3.17692700  |
| H | -0.56682400 | -2.36934400 | 3.74018700  |
| H | 0.68362400  | -1.84000800 | 2.60038500  |
| C | -2.42878100 | -4.36644500 | -1.12707200 |
| H | -2.81387700 | -5.27925600 | -0.63926700 |
| H | -3.16516100 | -4.06732100 | -1.88488500 |
| H | -1.50486800 | -4.64288000 | -1.65219800 |
| C | 0.25525800  | -3.93832600 | 0.60376000  |
| H | 1.14591500  | -3.37730800 | 0.91635500  |
| H | 0.18453400  | -4.82876000 | 1.25323900  |
| H | 0.43119700  | -4.29836800 | -0.41952400 |
| H | 1.65505100  | 1.13351600  | 1.27365500  |
| H | 2.26844000  | -1.65605100 | -1.98157500 |
| C | 6.08246800  | 0.48347200  | -0.21404900 |
| C | 6.58150200  | 1.78958200  | 0.04912200  |
| C | 7.03014000  | -0.55588400 | -0.42763500 |
| C | 7.96698800  | 2.04602400  | 0.09742500  |
| H | 5.88302200  | 2.61690400  | 0.18689700  |
| C | 8.41619400  | -0.30176700 | -0.37956800 |
| H | 6.68296800  | -1.57593700 | -0.60241000 |
| C | 8.89353900  | 1.00139700  | -0.11630100 |
| H | 8.32177700  | 3.06106800  | 0.29187300  |
| H | 9.12155400  | -1.12124500 | -0.53784600 |
| H | 9.96725000  | 1.19925900  | -0.07883500 |

|                |          |          |          |
|----------------|----------|----------|----------|
| Frequencies -- | 12.8645  | 15.9222  | 17.7877  |
| Frequencies -- | 28.7296  | 38.0230  | 41.6724  |
| Frequencies -- | 57.2168  | 69.0050  | 75.5123  |
| Frequencies -- | 88.2262  | 96.6338  | 102.7331 |
| Frequencies -- | 106.7046 | 112.7740 | 115.9883 |
| Frequencies -- | 117.7122 | 125.5667 | 128.6702 |
| Frequencies -- | 145.8282 | 150.1040 | 152.7824 |
| Frequencies -- | 156.6674 | 159.1847 | 166.2831 |
| Frequencies -- | 171.2752 | 191.1248 | 206.6637 |
| Frequencies -- | 209.1907 | 229.2951 | 237.3185 |
| Frequencies -- | 257.1564 | 264.8680 | 267.2592 |
| Frequencies -- | 273.2306 | 288.4310 | 291.8453 |
| Frequencies -- | 294.6917 | 299.2455 | 299.9016 |
| Frequencies -- | 319.6376 | 334.0056 | 344.3548 |
| Frequencies -- | 368.3040 | 385.5165 | 391.5865 |
| Frequencies -- | 397.6613 | 406.7842 | 416.5169 |
| Frequencies -- | 417.4268 | 427.0500 | 433.7730 |
| Frequencies -- | 458.9630 | 464.2509 | 508.5160 |
| Frequencies -- | 514.2681 | 536.4149 | 540.6193 |
| Frequencies -- | 543.1228 | 555.7111 | 556.7429 |
| Frequencies -- | 573.3926 | 582.8506 | 595.3217 |
| Frequencies -- | 605.5733 | 615.2252 | 622.0894 |

|                |           |           |           |
|----------------|-----------|-----------|-----------|
| Frequencies -- | 633.2779  | 633.9517  | 641.4957  |
| Frequencies -- | 672.2809  | 688.4097  | 706.8996  |
| Frequencies -- | 723.9032  | 727.3759  | 730.3752  |
| Frequencies -- | 746.9384  | 774.3286  | 802.2220  |
| Frequencies -- | 804.6315  | 835.3794  | 852.3210  |
| Frequencies -- | 857.7788  | 884.3632  | 921.0768  |
| Frequencies -- | 929.8374  | 964.4327  | 967.8941  |
| Frequencies -- | 969.5303  | 978.3996  | 984.8351  |
| Frequencies -- | 994.8393  | 1000.0811 | 1003.3428 |
| Frequencies -- | 1025.0435 | 1037.8662 | 1043.3533 |
| Frequencies -- | 1043.7964 | 1048.5459 | 1049.6199 |
| Frequencies -- | 1050.1052 | 1051.1548 | 1060.8552 |
| Frequencies -- | 1087.0113 | 1087.6589 | 1094.6485 |
| Frequencies -- | 1124.0018 | 1128.1978 | 1172.1178 |
| Frequencies -- | 1173.8087 | 1177.2391 | 1183.1686 |
| Frequencies -- | 1190.1864 | 1199.4034 | 1212.3483 |
| Frequencies -- | 1264.0226 | 1288.8704 | 1301.1733 |
| Frequencies -- | 1316.3432 | 1324.9128 | 1355.1665 |
| Frequencies -- | 1356.3600 | 1373.8445 | 1397.2452 |
| Frequencies -- | 1410.3877 | 1413.3018 | 1422.5368 |
| Frequencies -- | 1423.8438 | 1425.6755 | 1426.6791 |
| Frequencies -- | 1430.3743 | 1431.7277 | 1432.6848 |
| Frequencies -- | 1438.1260 | 1450.3829 | 1450.9339 |
| Frequencies -- | 1454.1011 | 1458.5419 | 1462.5322 |
| Frequencies -- | 1480.2469 | 1489.9260 | 1491.0532 |
| Frequencies -- | 1491.9316 | 1496.7526 | 1499.7989 |
| Frequencies -- | 1505.0888 | 1506.0542 | 1511.2236 |
| Frequencies -- | 1513.5261 | 1514.8598 | 1520.0302 |
| Frequencies -- | 1570.1367 | 1589.3965 | 1598.5510 |
| Frequencies -- | 1600.3958 | 1620.3545 | 1625.1001 |
| Frequencies -- | 2974.6333 | 3004.4909 | 3005.8905 |
| Frequencies -- | 3006.4928 | 3007.8976 | 3009.5358 |
| Frequencies -- | 3092.5700 | 3095.4764 | 3099.3659 |
| Frequencies -- | 3100.4549 | 3100.6575 | 3103.3880 |
| Frequencies -- | 3134.3905 | 3138.1627 | 3141.6365 |
| Frequencies -- | 3142.6623 | 3145.7716 | 3149.9968 |
| Frequencies -- | 3152.3145 | 3159.1803 | 3172.4574 |
| Frequencies -- | 3174.8708 | 3179.6467 | 3183.1851 |
| Frequencies -- | 3193.7252 | 3199.2726 | 3224.4405 |

**Catalyst 9:**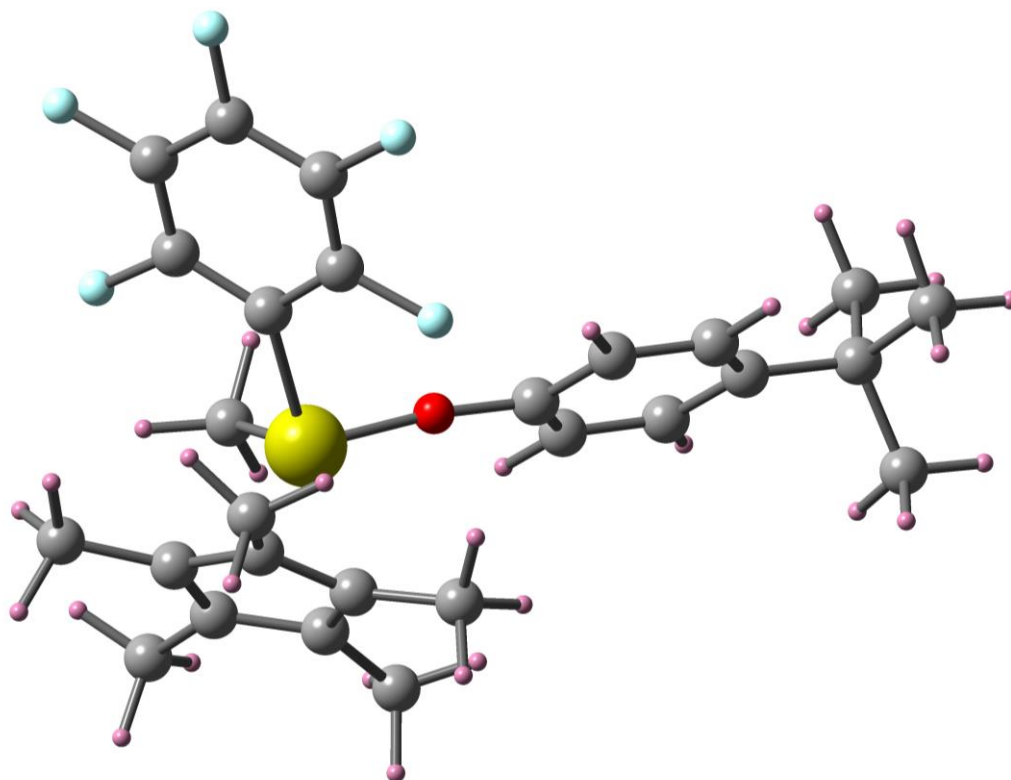

| <b>vacuum</b> | <b>toluene-like solvent</b> | <b>D3 dispersion</b> |
|---------------|-----------------------------|----------------------|
| -1679.5650943 | -1679.5700472               | -0.4058214           |

|    |             |             |             |
|----|-------------|-------------|-------------|
| Ti | -0.86642300 | -1.03256100 | -0.40500200 |
| C  | -0.94033300 | -1.57691000 | -2.42161800 |
| H  | -0.68363700 | -0.62075000 | -2.91816800 |
| H  | -0.18409600 | -2.32874300 | -2.69786500 |
| H  | -1.93284000 | -1.90833100 | -2.75785400 |
| O  | 0.81166200  | -0.41914300 | -0.41790300 |
| C  | 2.15193000  | -0.08966000 | -0.35066700 |
| C  | 2.59649400  | 0.95252300  | 0.49440200  |
| C  | 3.09328500  | -0.77978900 | -1.15410800 |
| C  | 3.96538600  | 1.28949000  | 0.53325200  |
| C  | 4.45391700  | -0.42994300 | -1.09681600 |
| C  | 4.93301700  | 0.61187900  | -0.25317200 |
| H  | 4.26410300  | 2.10119400  | 1.19481600  |
| H  | 5.14906200  | -0.98427400 | -1.72892800 |
| C  | -2.16249200 | -1.79866200 | 1.55621800  |
| C  | -2.70423200 | -2.52474000 | 0.43119800  |
| C  | -0.76855000 | -2.16443400 | 1.69581900  |
| C  | -1.65673200 | -3.34948400 | -0.12064600 |
| C  | -0.45494200 | -3.12194100 | 0.65789500  |
| C  | -2.01997700 | 0.82475400  | -0.21663200 |
| C  | -3.08329700 | 1.16002000  | -1.07261500 |
| C  | -1.66948800 | 1.84046700  | 0.68803800  |
| C  | -3.75051400 | 2.40162900  | -1.06220000 |

|                |             |             |             |
|----------------|-------------|-------------|-------------|
| F              | -3.54397400 | 0.21738900  | -2.01533800 |
| C              | -2.29126600 | 3.10208300  | 0.75102800  |
| F              | -0.63599800 | 1.61251900  | 1.62419900  |
| C              | -3.34511300 | 3.38436900  | -0.13934900 |
| F              | -4.79756500 | 2.67203100  | -1.93973700 |
| F              | -1.89265100 | 4.06594500  | 1.67480500  |
| F              | -3.98194500 | 4.61771800  | -0.10279000 |
| C              | -2.95348700 | -0.96139900 | 2.53552800  |
| H              | -3.38413200 | -1.61116800 | 3.31791400  |
| H              | -2.32927400 | -0.21361800 | 3.04028000  |
| H              | -3.78827900 | -0.43321400 | 2.05640100  |
| C              | -4.14568400 | -2.51661200 | -0.02511000 |
| H              | -4.68273800 | -3.38671100 | 0.39270700  |
| H              | -4.67925100 | -1.61556700 | 0.30309200  |
| H              | -4.23619700 | -2.57236400 | -1.11868400 |
| C              | 0.14959900  | -1.73459000 | 2.81830200  |
| H              | -0.05331300 | -0.70798800 | 3.15061600  |
| H              | 0.01446000  | -2.39679000 | 3.69177800  |
| H              | 1.20859400  | -1.78489300 | 2.53230400  |
| C              | -1.84419500 | -4.41756300 | -1.17280300 |
| H              | -2.16559900 | -5.35997700 | -0.69524300 |
| H              | -2.61404400 | -4.14614200 | -1.90753900 |
| H              | -0.91886000 | -4.63040200 | -1.72427600 |
| C              | 0.85290900  | -3.86486400 | 0.49840000  |
| H              | 1.71392000  | -3.26643700 | 0.82346900  |
| H              | 0.84390100  | -4.78555000 | 1.10836900  |
| H              | 1.03229400  | -4.16889600 | -0.54235100 |
| H              | 1.87536200  | 1.49225700  | 1.10592500  |
| H              | 2.75286700  | -1.57582400 | -1.81740600 |
| C              | 6.44941100  | 0.95692200  | -0.22169300 |
| C              | 7.25600800  | -0.29029700 | 0.26961100  |
| H              | 7.11924500  | -1.15544300 | -0.39549300 |
| H              | 8.33332000  | -0.06068200 | 0.30348900  |
| H              | 6.93819700  | -0.58959900 | 1.28071800  |
| C              | 6.92954900  | 1.35448000  | -1.65627100 |
| H              | 6.37561100  | 2.23166300  | -2.02528000 |
| H              | 8.00208400  | 1.60690900  | -1.64327800 |
| H              | 6.78757900  | 0.53902200  | -2.38017500 |
| C              | 6.77144200  | 2.14252400  | 0.73522700  |
| H              | 6.25616700  | 3.06664500  | 0.43114900  |
| H              | 6.49360100  | 1.91716600  | 1.77637700  |
| H              | 7.85322700  | 2.34609200  | 0.71884600  |
| Frequencies -- | 5.0494      | 16.1442     | 19.4783     |
| Frequencies -- | 30.3574     | 39.1249     | 43.5435     |
| Frequencies -- | 48.0189     | 70.5703     | 79.9328     |
| Frequencies -- | 82.4716     | 94.7016     | 101.7447    |
| Frequencies -- | 107.2562    | 109.9641    | 114.9125    |
| Frequencies -- | 118.9544    | 121.6636    | 128.3648    |
| Frequencies -- | 145.6400    | 154.7358    | 156.6236    |
| Frequencies -- | 162.4629    | 170.0651    | 178.9980    |
| Frequencies -- | 190.2757    | 199.4887    | 206.7530    |
| Frequencies -- | 211.5673    | 221.7376    | 229.9569    |
| Frequencies -- | 244.7016    | 254.3141    | 265.1517    |
| Frequencies -- | 265.6403    | 274.6239    | 287.0922    |
| Frequencies -- | 291.9760    | 294.1936    | 295.6313    |
| Frequencies -- | 298.3215    | 302.5888    | 319.0761    |
| Frequencies -- | 321.6087    | 323.5308    | 344.0554    |

|                |           |           |           |
|----------------|-----------|-----------|-----------|
| Frequencies -- | 357.6318  | 373.1001  | 385.8206  |
| Frequencies -- | 387.7583  | 393.5858  | 411.5915  |
| Frequencies -- | 421.3191  | 427.4684  | 432.6480  |
| Frequencies -- | 449.0687  | 461.6515  | 477.4659  |
| Frequencies -- | 509.9624  | 536.4445  | 540.7257  |
| Frequencies -- | 542.9444  | 554.1207  | 554.5046  |
| Frequencies -- | 556.7210  | 571.7144  | 582.5149  |
| Frequencies -- | 595.3284  | 605.4258  | 613.7035  |
| Frequencies -- | 634.4038  | 641.0345  | 667.5179  |
| Frequencies -- | 687.4131  | 715.2201  | 723.4319  |
| Frequencies -- | 730.4806  | 737.3767  | 802.7421  |
| Frequencies -- | 803.6127  | 831.8826  | 833.8552  |
| Frequencies -- | 846.2903  | 884.0582  | 921.0561  |
| Frequencies -- | 926.8648  | 933.9583  | 955.7219  |
| Frequencies -- | 963.4864  | 968.4299  | 968.8813  |
| Frequencies -- | 981.0329  | 994.4286  | 1025.8854 |
| Frequencies -- | 1037.2647 | 1038.2472 | 1040.6938 |
| Frequencies -- | 1043.6664 | 1044.0854 | 1049.0234 |
| Frequencies -- | 1050.9233 | 1051.8517 | 1086.3572 |
| Frequencies -- | 1087.9490 | 1123.2678 | 1123.9872 |
| Frequencies -- | 1132.1440 | 1172.5065 | 1173.9048 |
| Frequencies -- | 1177.0640 | 1189.6537 | 1206.0783 |
| Frequencies -- | 1215.0989 | 1222.9091 | 1262.8601 |
| Frequencies -- | 1275.6110 | 1288.1461 | 1326.7582 |
| Frequencies -- | 1349.6186 | 1354.3908 | 1395.8900 |
| Frequencies -- | 1396.1826 | 1398.7692 | 1410.4503 |
| Frequencies -- | 1412.7660 | 1421.6347 | 1423.3624 |
| Frequencies -- | 1424.2956 | 1425.5507 | 1426.3482 |
| Frequencies -- | 1430.4098 | 1432.0497 | 1432.5035 |
| Frequencies -- | 1437.7495 | 1450.4482 | 1453.9467 |
| Frequencies -- | 1458.3502 | 1462.3711 | 1480.2012 |
| Frequencies -- | 1482.1618 | 1487.3035 | 1490.1421 |
| Frequencies -- | 1491.0626 | 1491.3293 | 1497.2139 |
| Frequencies -- | 1499.4334 | 1499.5666 | 1504.4418 |
| Frequencies -- | 1505.9721 | 1509.7161 | 1510.7799 |
| Frequencies -- | 1511.5027 | 1514.4852 | 1515.1320 |
| Frequencies -- | 1520.1274 | 1578.0992 | 1588.8896 |
| Frequencies -- | 1600.2037 | 1622.1725 | 2974.1433 |
| Frequencies -- | 3004.3573 | 3005.0332 | 3006.0113 |
| Frequencies -- | 3006.2706 | 3007.2278 | 3007.8202 |
| Frequencies -- | 3008.9467 | 3014.7839 | 3091.2910 |
| Frequencies -- | 3095.0151 | 3098.0906 | 3099.3000 |
| Frequencies -- | 3100.4245 | 3103.3116 | 3105.7426 |
| Frequencies -- | 3108.9507 | 3114.2030 | 3121.0735 |
| Frequencies -- | 3123.0159 | 3125.5667 | 3134.8528 |
| Frequencies -- | 3137.5583 | 3140.9959 | 3141.7644 |
| Frequencies -- | 3144.4897 | 3149.9022 | 3169.4027 |
| Frequencies -- | 3194.3259 | 3198.1929 | 3222.0708 |

**Catalyst 10:**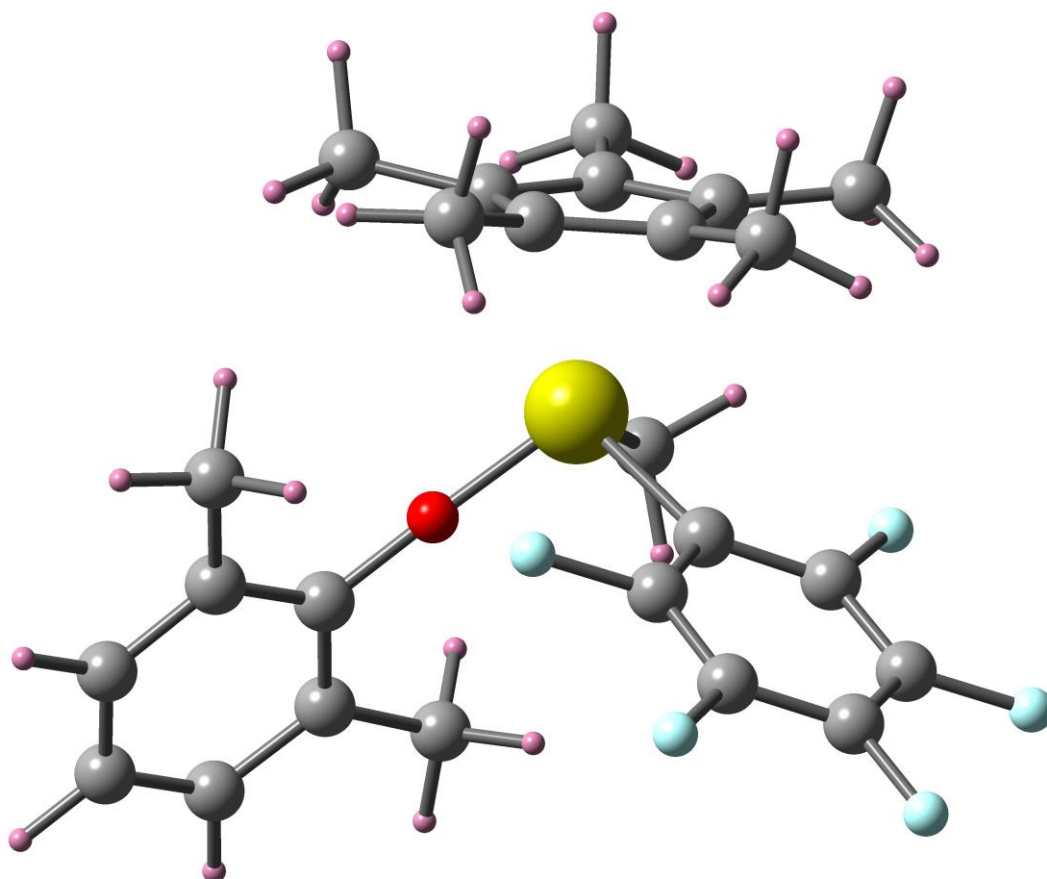

| <b>vacuum</b> | <b>toluene-like solvent</b> | <b>D3 dispersion</b> |
|---------------|-----------------------------|----------------------|
| -1600.9846181 | -1600.98987                 | -0.37649573          |

|    |             |             |             |
|----|-------------|-------------|-------------|
| Ti | -0.33198200 | 0.91652200  | -0.38028400 |
| C  | -0.32688600 | 1.28261400  | -2.44156600 |
| H  | -0.06936700 | 0.30283300  | -2.87415400 |
| H  | -1.33265700 | 1.57359400  | -2.78578800 |
| H  | 0.40866400  | 2.02333000  | -2.77500600 |
| O  | -1.63069900 | -0.33785500 | -0.36299600 |
| C  | -2.62163100 | -1.32121900 | -0.39469000 |
| C  | -3.36376600 | -1.62746700 | 0.78848800  |
| C  | -2.85602400 | -2.03300400 | -1.61394800 |
| C  | -4.36342800 | -2.62600400 | 0.71536300  |
| C  | -3.86406600 | -3.02596100 | -1.62886000 |
| C  | -4.62246400 | -3.32223000 | -0.48040500 |
| H  | -4.93524900 | -2.86177300 | 1.61525000  |
| H  | -4.04704400 | -3.57320500 | -2.55593400 |
| C  | -0.41036500 | 2.23433900  | 1.64608500  |
| C  | 0.93668200  | 2.43349200  | 1.15337300  |
| C  | -1.32453800 | 2.81068900  | 0.68339300  |
| C  | 0.85663800  | 3.16134500  | -0.08966700 |
| C  | -0.53398800 | 3.39400700  | -0.38376300 |
| C  | 1.40179400  | -0.40165400 | -0.08384400 |

|   |             |             |             |
|---|-------------|-------------|-------------|
| C | 2.51881500  | -0.45939300 | -0.93655400 |
| C | 1.41435800  | -1.36699900 | 0.93723600  |
| C | 3.55919800  | -1.40390100 | -0.81977200 |
| F | 2.65195300  | 0.47121600  | -1.98767700 |
| C | 2.42091700  | -2.33548100 | 1.11244000  |
| F | 0.36761100  | -1.38687300 | 1.88380500  |
| C | 3.50689300  | -2.35446700 | 0.21686000  |
| F | 4.63529100  | -1.40945400 | -1.70426300 |
| F | 2.36684500  | -3.26272600 | 2.15033300  |
| F | 4.51845600  | -3.29483500 | 0.35936400  |
| C | -3.09942700 | -0.93704300 | 2.11096300  |
| H | -2.07589900 | -1.12900000 | 2.45879000  |
| H | -3.21878600 | 0.14985700  | 2.02918300  |
| H | -3.79480000 | -1.29666600 | 2.88188600  |
| C | -2.05457900 | -1.77471000 | -2.87633100 |
| H | -2.22129400 | -0.76005300 | -3.26408400 |
| H | -0.97425200 | -1.88140600 | -2.69702600 |
| H | -2.33663800 | -2.48644100 | -3.66456100 |
| C | -0.73905800 | 1.74183500  | 3.03841700  |
| H | -0.38027800 | 2.47847700  | 3.77803000  |
| H | -1.81644800 | 1.62713100  | 3.19822000  |
| H | -0.25929200 | 0.78318000  | 3.27653500  |
| C | 2.20098400  | 2.15002000  | 1.93295000  |
| H | 2.46352700  | 3.02649400  | 2.55200300  |
| H | 2.08700500  | 1.29518100  | 2.61191100  |
| H | 3.05861500  | 1.94649600  | 1.27860000  |
| C | -2.82013500 | 2.99628800  | 0.83277600  |
| H | -3.25585600 | 2.33627400  | 1.59132000  |
| H | -3.04275500 | 4.03425800  | 1.13573300  |
| H | -3.35985300 | 2.81261300  | -0.10852000 |
| C | 2.03219000  | 3.68839300  | -0.87918700 |
| H | 2.32608100  | 4.68307900  | -0.49906800 |
| H | 2.91095900  | 3.03556400  | -0.80281300 |
| H | 1.80029800  | 3.80639200  | -1.94593000 |
| C | -1.07818900 | 4.27568300  | -1.48388200 |
| H | -2.09225600 | 3.98379200  | -1.78922300 |
| H | -1.13251900 | 5.32067000  | -1.13029100 |
| H | -0.44482600 | 4.26874500  | -2.38010600 |
| H | -5.39686600 | -4.09106000 | -0.51407700 |

|                |          |          |          |
|----------------|----------|----------|----------|
| Frequencies -- | 10.3217  | 19.6704  | 24.3621  |
| Frequencies -- | 32.2415  | 36.9103  | 42.9185  |
| Frequencies -- | 72.3133  | 85.2280  | 92.0905  |
| Frequencies -- | 102.0399 | 108.4495 | 112.9090 |
| Frequencies -- | 118.3423 | 119.5282 | 128.1131 |
| Frequencies -- | 133.9143 | 134.5375 | 141.7361 |
| Frequencies -- | 153.0138 | 153.8769 | 156.1180 |
| Frequencies -- | 176.6403 | 182.2952 | 185.6543 |
| Frequencies -- | 200.1836 | 205.1968 | 208.8458 |
| Frequencies -- | 220.1639 | 229.5758 | 249.9526 |
| Frequencies -- | 260.5000 | 264.8284 | 269.6574 |
| Frequencies -- | 281.7410 | 284.4272 | 288.4369 |
| Frequencies -- | 294.6965 | 296.8633 | 297.6170 |
| Frequencies -- | 317.0822 | 319.8822 | 345.1730 |
| Frequencies -- | 350.0039 | 355.9262 | 380.6731 |
| Frequencies -- | 384.1351 | 385.7221 | 409.6894 |
| Frequencies -- | 428.5545 | 461.0542 | 496.1922 |
| Frequencies -- | 509.0126 | 516.0387 | 532.6642 |

|                |           |           |           |
|----------------|-----------|-----------|-----------|
| Frequencies -- | 539.9716  | 543.7508  | 551.1670  |
| Frequencies -- | 554.6765  | 555.9715  | 559.8053  |
| Frequencies -- | 566.4934  | 584.8576  | 596.2899  |
| Frequencies -- | 601.9742  | 618.8781  | 632.7985  |
| Frequencies -- | 679.4740  | 687.6933  | 721.0212  |
| Frequencies -- | 727.7001  | 740.5898  | 744.3674  |
| Frequencies -- | 780.5177  | 799.9484  | 804.4640  |
| Frequencies -- | 885.5058  | 904.7135  | 912.1600  |
| Frequencies -- | 926.6762  | 966.8056  | 968.7268  |
| Frequencies -- | 980.5544  | 994.8764  | 1009.1047 |
| Frequencies -- | 1038.6552 | 1040.2604 | 1043.8597 |
| Frequencies -- | 1048.0310 | 1049.1274 | 1051.7203 |
| Frequencies -- | 1051.9710 | 1059.1575 | 1065.6479 |
| Frequencies -- | 1084.7600 | 1086.0584 | 1115.7347 |
| Frequencies -- | 1121.5041 | 1172.3780 | 1175.8993 |
| Frequencies -- | 1176.7222 | 1189.7471 | 1191.0519 |
| Frequencies -- | 1203.0619 | 1279.2952 | 1285.7280 |
| Frequencies -- | 1288.4118 | 1354.0352 | 1357.3833 |
| Frequencies -- | 1396.0137 | 1409.4323 | 1411.9771 |
| Frequencies -- | 1420.3176 | 1420.9181 | 1423.1090 |
| Frequencies -- | 1424.3471 | 1426.0799 | 1427.8110 |
| Frequencies -- | 1428.5688 | 1434.3532 | 1437.2022 |
| Frequencies -- | 1448.3720 | 1450.3467 | 1454.6443 |
| Frequencies -- | 1459.7158 | 1464.8703 | 1472.4816 |
| Frequencies -- | 1481.4538 | 1486.3724 | 1487.8459 |
| Frequencies -- | 1490.8530 | 1493.0624 | 1497.0791 |
| Frequencies -- | 1498.9585 | 1501.3056 | 1505.4138 |
| Frequencies -- | 1509.8678 | 1511.4191 | 1513.2670 |
| Frequencies -- | 1517.0390 | 1520.5539 | 1589.0841 |
| Frequencies -- | 1600.4683 | 1603.9568 | 1609.8852 |
| Frequencies -- | 3003.2346 | 3004.8533 | 3005.3360 |
| Frequencies -- | 3006.2994 | 3008.2315 | 3015.1680 |
| Frequencies -- | 3023.1594 | 3042.1704 | 3087.9276 |
| Frequencies -- | 3097.3024 | 3099.8488 | 3100.9573 |
| Frequencies -- | 3105.9263 | 3113.5089 | 3119.5625 |
| Frequencies -- | 3130.2310 | 3138.4866 | 3139.6046 |
| Frequencies -- | 3142.7827 | 3143.5844 | 3146.9504 |
| Frequencies -- | 3151.9200 | 3157.9618 | 3165.3819 |
| Frequencies -- | 3166.2204 | 3168.7611 | 3191.1230 |



**Catalyst 11:**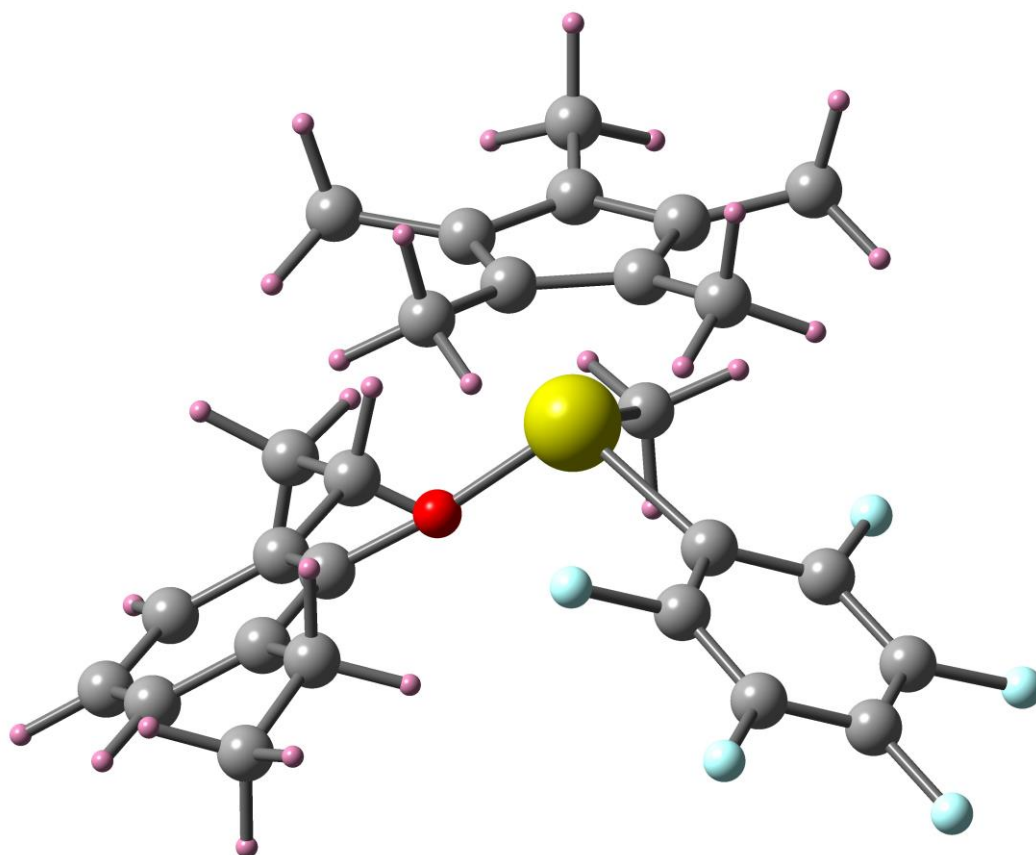

| <b>vacuum</b> | <b>toluene-like solvent</b> | <b>D3 dispersion</b> |
|---------------|-----------------------------|----------------------|
| -1679.5574157 | -1679.5622716               | -0.41287598          |

|    |             |             |             |
|----|-------------|-------------|-------------|
| Ti | -0.15600900 | 0.88197500  | -0.08264500 |
| C  | -0.38430600 | 1.84888800  | -1.92035000 |
| H  | -0.30211000 | 1.01491800  | -2.64101700 |
| H  | -1.34832100 | 2.35107000  | -2.06125300 |
| H  | 0.43148800  | 2.56093200  | -2.09559500 |
| O  | -1.47513800 | -0.34543600 | -0.27325700 |
| C  | -2.60427400 | -1.16607300 | -0.39584400 |
| C  | -2.64525100 | -2.40760000 | 0.31867600  |
| C  | -3.68241100 | -0.75980300 | -1.24983800 |
| C  | -3.78656200 | -3.22772200 | 0.16017800  |
| C  | -4.79899400 | -1.62066500 | -1.36058800 |
| C  | -4.85729900 | -2.84350200 | -0.66694000 |
| H  | -3.83694800 | -4.17845800 | 0.68809800  |
| H  | -5.63219600 | -1.33554800 | -2.00068600 |
| C  | 1.09579200  | 1.99343800  | 1.77947300  |
| C  | 0.80997100  | 3.04223000  | 0.83146400  |
| C  | -0.16545200 | 1.46471600  | 2.25412900  |
| C  | -0.62222500 | 3.17281200  | 0.72032600  |
| C  | -1.23018300 | 2.18677000  | 1.59248400  |
| C  | 1.79126100  | -0.15975900 | -0.39788300 |

|                |             |             |             |
|----------------|-------------|-------------|-------------|
| C              | 2.70031300  | 0.12611700  | -1.43758200 |
| C              | 2.19074400  | -1.24731100 | 0.39905800  |
| C              | 3.87184900  | -0.61484200 | -1.70136700 |
| F              | 2.49231100  | 1.22763700  | -2.28983000 |
| C              | 3.34179300  | -2.03069400 | 0.19182400  |
| F              | 1.41610900  | -1.59591500 | 1.52795300  |
| C              | 4.19285400  | -1.71182100 | -0.88199000 |
| F              | 4.71966700  | -0.27239500 | -2.75204600 |
| F              | 3.65804100  | -3.09615200 | 1.03237900  |
| F              | 5.33991800  | -2.45710700 | -1.11803100 |
| C              | -1.49210500 | -2.81748500 | 1.22979300  |
| H              | -0.55131800 | -2.70597800 | 0.67680700  |
| H              | -1.43860600 | -2.08947600 | 2.05501300  |
| C              | -3.61458100 | 0.55208300  | -2.03015700 |
| H              | -3.36592500 | 1.36415700  | -1.33037800 |
| H              | -2.76461600 | 0.49424800  | -2.72726600 |
| C              | 2.46162800  | 1.67868700  | 2.34571800  |
| H              | 2.69832600  | 2.39005700  | 3.15698100  |
| H              | 2.51537100  | 0.66992800  | 2.77207600  |
| H              | 3.25633900  | 1.77006800  | 1.59324000  |
| C              | 1.84199600  | 3.92155000  | 0.16331400  |
| H              | 2.15159300  | 4.73236500  | 0.84657600  |
| H              | 2.74860000  | 3.36437000  | -0.11014400 |
| H              | 1.45762900  | 4.39575100  | -0.74905600 |
| C              | -0.34145400 | 0.49305600  | 3.39934500  |
| H              | -1.25321000 | -0.10772300 | 3.29392900  |
| H              | 0.50272900  | -0.19946700 | 3.49345700  |
| H              | -0.42567700 | 1.04930000  | 4.34971300  |
| C              | -1.35247200 | 4.28306700  | 0.00043400  |
| H              | -1.40075300 | 5.17552800  | 0.64897200  |
| H              | -0.85052400 | 4.58311900  | -0.92841900 |
| H              | -2.38624800 | 4.01078100  | -0.25093000 |
| C              | -2.70414600 | 2.07096800  | 1.91402200  |
| H              | -2.99560300 | 1.04336700  | 2.17013200  |
| H              | -2.95395700 | 2.70919400  | 2.78002700  |
| H              | -3.34005700 | 2.39463500  | 1.07924500  |
| H              | -5.72912600 | -3.49245000 | -0.77352400 |
| C              | -4.87270400 | 0.96094200  | -2.82813600 |
| H              | -5.11707300 | 0.23292700  | -3.61728300 |
| H              | -5.75611400 | 1.07275000  | -2.17938700 |
| H              | -4.69479400 | 1.93035300  | -3.32094000 |
| C              | -1.54310300 | -4.23708900 | 1.83539600  |
| H              | -0.63601500 | -4.40760900 | 2.43642200  |
| H              | -2.41087200 | -4.37817300 | 2.49937500  |
| H              | -1.57719900 | -5.01525100 | 1.05646400  |
| Frequencies -- | 12.3365     | 21.0216     | 24.5461     |
| Frequencies -- | 33.1583     | 35.0563     | 45.5783     |
| Frequencies -- | 56.2658     | 70.5087     | 77.6002     |
| Frequencies -- | 85.5921     | 93.0229     | 94.9492     |
| Frequencies -- | 107.5575    | 115.7775    | 121.4034    |
| Frequencies -- | 124.9531    | 127.6033    | 134.0437    |
| Frequencies -- | 144.2454    | 155.0328    | 157.6336    |
| Frequencies -- | 166.6901    | 171.7803    | 179.1483    |
| Frequencies -- | 184.6436    | 190.7469    | 197.0253    |
| Frequencies -- | 204.8620    | 210.0579    | 224.5201    |
| Frequencies -- | 249.3093    | 264.0621    | 265.7809    |
| Frequencies -- | 270.8137    | 283.0797    | 287.6573    |

|                |           |           |           |
|----------------|-----------|-----------|-----------|
| Frequencies -- | 290.9089  | 291.7671  | 299.2803  |
| Frequencies -- | 301.1589  | 301.8725  | 304.2654  |
| Frequencies -- | 320.8812  | 322.7868  | 326.4271  |
| Frequencies -- | 339.3657  | 349.2490  | 368.5528  |
| Frequencies -- | 378.1683  | 382.3639  | 393.3772  |
| Frequencies -- | 405.6562  | 430.3291  | 459.5545  |
| Frequencies -- | 499.4277  | 509.8422  | 533.0539  |
| Frequencies -- | 533.8001  | 539.4408  | 545.0381  |
| Frequencies -- | 551.8278  | 554.9402  | 569.9945  |
| Frequencies -- | 581.0694  | 585.3619  | 591.5340  |
| Frequencies -- | 598.9045  | 606.2823  | 616.0614  |
| Frequencies -- | 632.9064  | 676.2089  | 686.4941  |
| Frequencies -- | 715.1745  | 716.4012  | 723.7672  |
| Frequencies -- | 728.3382  | 770.8113  | 786.3487  |
| Frequencies -- | 801.1168  | 805.5004  | 824.7366  |
| Frequencies -- | 855.2779  | 886.7574  | 907.9642  |
| Frequencies -- | 919.6061  | 967.1935  | 971.7717  |
| Frequencies -- | 987.2965  | 993.1048  | 995.1490  |
| Frequencies -- | 1025.2638 | 1038.1688 | 1042.2761 |
| Frequencies -- | 1045.8396 | 1048.7320 | 1049.1199 |
| Frequencies -- | 1050.8166 | 1058.3720 | 1086.9337 |
| Frequencies -- | 1087.5668 | 1091.7995 | 1097.7843 |
| Frequencies -- | 1101.7361 | 1124.3106 | 1126.3296 |
| Frequencies -- | 1173.7936 | 1176.1669 | 1179.0169 |
| Frequencies -- | 1187.6245 | 1188.9516 | 1202.2207 |
| Frequencies -- | 1262.9784 | 1278.6006 | 1284.0105 |
| Frequencies -- | 1287.5960 | 1290.4416 | 1319.9976 |
| Frequencies -- | 1347.2799 | 1348.0730 | 1383.1587 |
| Frequencies -- | 1389.7705 | 1410.6463 | 1411.3527 |
| Frequencies -- | 1412.4284 | 1413.3239 | 1422.1636 |
| Frequencies -- | 1423.4832 | 1427.6362 | 1430.3204 |
| Frequencies -- | 1431.0538 | 1433.2504 | 1440.6470 |
| Frequencies -- | 1444.5121 | 1450.6798 | 1456.3860 |
| Frequencies -- | 1458.9552 | 1463.4603 | 1467.9724 |
| Frequencies -- | 1479.4827 | 1480.9734 | 1491.6131 |
| Frequencies -- | 1492.9653 | 1494.0561 | 1499.4380 |
| Frequencies -- | 1500.4864 | 1501.7282 | 1502.2555 |
| Frequencies -- | 1506.0930 | 1507.3588 | 1507.5059 |
| Frequencies -- | 1508.4147 | 1513.7314 | 1514.9147 |
| Frequencies -- | 1517.0893 | 1586.7535 | 1599.7293 |
| Frequencies -- | 1600.8219 | 1612.0874 | 2995.9786 |
| Frequencies -- | 3004.8026 | 3005.6118 | 3006.8812 |
| Frequencies -- | 3008.4221 | 3008.9098 | 3009.0254 |
| Frequencies -- | 3009.7937 | 3036.0439 | 3043.3354 |
| Frequencies -- | 3084.2258 | 3096.8747 | 3097.6204 |
| Frequencies -- | 3099.8669 | 3101.2758 | 3101.4672 |
| Frequencies -- | 3109.1322 | 3110.5456 | 3114.1383 |
| Frequencies -- | 3119.3101 | 3128.0028 | 3129.7400 |
| Frequencies -- | 3135.7321 | 3139.0495 | 3143.1324 |
| Frequencies -- | 3151.1948 | 3160.3681 | 3165.2814 |
| Frequencies -- | 3171.2534 | 3201.8486 | 3212.1362 |

**Catalyst 12:**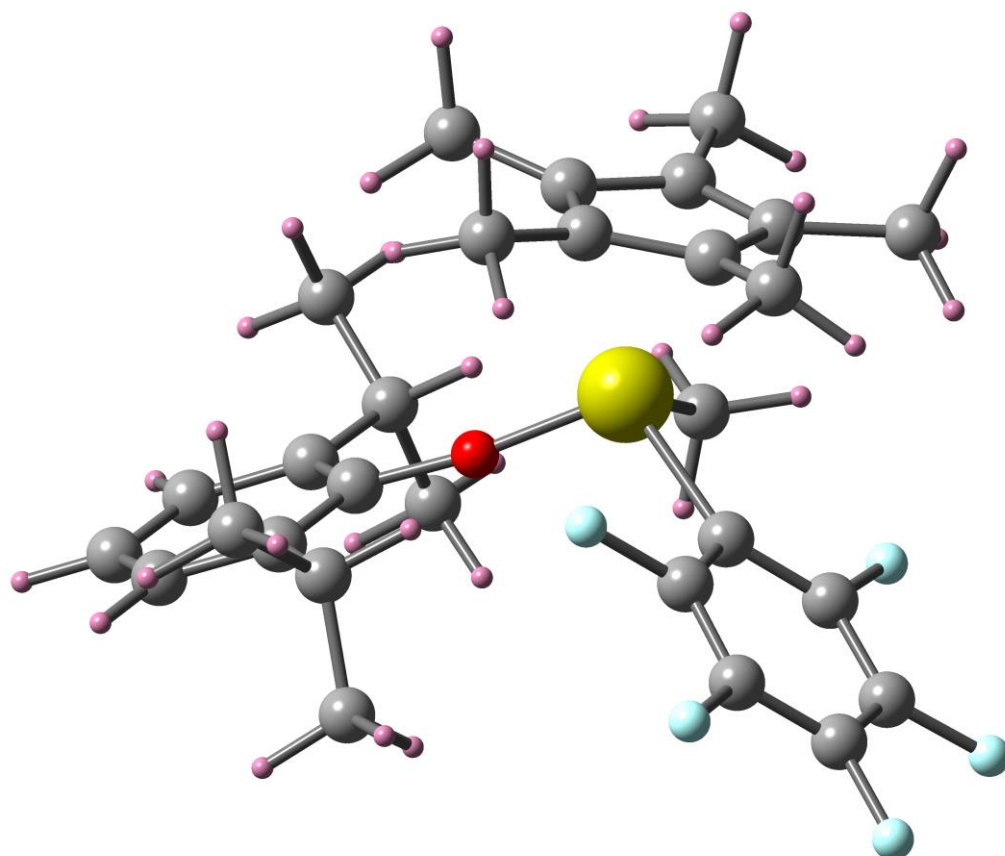

| <b>vacuum</b> | <b>toluene-like solvent</b> | <b>D3 dispersion</b> |
|---------------|-----------------------------|----------------------|
| -1758.1339877 | -1758.1388286               | -0.45251006          |

|    |             |             |             |
|----|-------------|-------------|-------------|
| Ti | -0.06011700 | 0.97504400  | -0.03534300 |
| C  | -0.37047700 | 1.98397500  | -1.84015400 |
| H  | -0.31550500 | 1.16834700  | -2.58370800 |
| H  | -1.33257300 | 2.49992100  | -1.94758300 |
| H  | 0.44292400  | 2.69774400  | -2.02469400 |
| O  | -1.33244700 | -0.30219700 | -0.22143000 |
| C  | -2.43294900 | -1.16976900 | -0.30739600 |
| C  | -2.35558800 | -2.46493100 | 0.30559400  |
| C  | -3.60483200 | -0.76707300 | -1.03386500 |
| C  | -3.46463400 | -3.33366000 | 0.17405300  |
| C  | -4.67895900 | -1.68397900 | -1.12573600 |
| C  | -4.62054800 | -2.95548900 | -0.52974100 |
| H  | -3.41687800 | -4.32401800 | 0.62769900  |
| H  | -5.57385400 | -1.39790600 | -1.67912200 |
| C  | 1.14417400  | 2.00455800  | 1.90274000  |
| C  | 0.92120600  | 3.08032000  | 0.96769600  |
| C  | -0.14663400 | 1.49245900  | 2.31046300  |
| C  | -0.50174400 | 3.25658400  | 0.81118400  |
| C  | -1.16597100 | 2.26423000  | 1.63332900  |
| C  | 1.91732700  | -0.00363600 | -0.40278200 |

|   |             |             |             |
|---|-------------|-------------|-------------|
| C | 2.76884900  | 0.29979800  | -1.48576000 |
| C | 2.39191700  | -1.06564500 | 0.38731100  |
| C | 3.95392700  | -0.40196200 | -1.79290900 |
| F | 2.48255700  | 1.37997700  | -2.34200600 |
| C | 3.55858700  | -1.81174800 | 0.13661900  |
| F | 1.68413500  | -1.43016600 | 1.55422000  |
| C | 4.34951700  | -1.47695400 | -0.97716500 |
| F | 4.74119500  | -0.04333500 | -2.88441500 |
| F | 3.94557000  | -2.85768200 | 0.97213500  |
| F | 5.50983000  | -2.18569100 | -1.25706600 |
| C | -1.10664800 | -2.95635600 | 1.04513200  |
| H | -0.44115500 | -2.10260400 | 1.18085200  |
| C | -3.72066000 | 0.58174600  | -1.75762100 |
| H | -2.89879700 | 1.21439600  | -1.41254600 |
| C | 2.47811700  | 1.65407500  | 2.52127000  |
| H | 2.69847200  | 2.36144100  | 3.34055900  |
| H | 2.48865800  | 0.64552900  | 2.94925800  |
| H | 3.30511000  | 1.72528800  | 1.80209600  |
| C | 1.99996800  | 3.94052700  | 0.35055200  |
| H | 2.29360900  | 4.74532600  | 1.04780800  |
| H | 2.90687800  | 3.36469300  | 0.12026300  |
| H | 1.66788000  | 4.42107500  | -0.57892800 |
| C | -0.39821000 | 0.48025500  | 3.40505200  |
| H | 0.39578300  | -0.27296400 | 3.46815700  |
| H | -0.44707700 | 0.99202700  | 4.38273100  |
| H | -1.35081700 | -0.04850400 | 3.26983500  |
| C | -1.17224500 | 4.41282600  | 0.10652500  |
| H | -1.21433500 | 5.28338200  | 0.78459400  |
| H | -0.62935900 | 4.72839000  | -0.79387100 |
| H | -2.20439000 | 4.18256500  | -0.18891700 |
| C | -2.65179400 | 2.18650300  | 1.90579700  |
| H | -2.98683900 | 1.16035400  | 2.10885200  |
| H | -2.90343900 | 2.79515800  | 2.79243300  |
| H | -3.24924400 | 2.57017300  | 1.06935800  |
| H | -5.46319000 | -3.64438700 | -0.61781100 |
| C | -1.41838200 | -3.51622000 | 2.46226400  |
| H | -1.98021300 | -2.78707700 | 3.06707500  |
| H | -2.00663600 | -4.44583600 | 2.42548600  |
| H | -0.47685700 | -3.74206200 | 2.98820900  |
| C | -0.33548200 | -4.00822900 | 0.19206700  |
| H | -0.06456800 | -3.59747800 | -0.79320600 |
| H | 0.59198500  | -4.30949800 | 0.70437200  |
| H | -0.94095900 | -4.91262600 | 0.02348900  |
| C | -3.55018100 | 0.39742700  | -3.29576800 |
| H | -3.56619400 | 1.37392900  | -3.80695400 |
| H | -2.59568200 | -0.09525700 | -3.53311500 |
| H | -4.36048000 | -0.21895500 | -3.71546300 |
| C | -5.04225100 | 1.33834600  | -1.43944500 |
| H | -5.19310800 | 1.44619500  | -0.35441300 |
| H | -5.01335900 | 2.34664300  | -1.88465800 |
| H | -5.92562600 | 0.82741200  | -1.85080000 |

|                |          |          |          |
|----------------|----------|----------|----------|
| Frequencies -- | 15.0226  | 21.2909  | 25.4241  |
| Frequencies -- | 28.9263  | 37.5092  | 50.2039  |
| Frequencies -- | 57.4009  | 63.3107  | 72.3406  |
| Frequencies -- | 76.7645  | 93.3563  | 101.9928 |
| Frequencies -- | 111.2893 | 120.2893 | 122.2552 |

|                |           |           |           |
|----------------|-----------|-----------|-----------|
| Frequencies -- | 125.9899  | 126.4986  | 131.0204  |
| Frequencies -- | 135.6510  | 148.4825  | 152.7681  |
| Frequencies -- | 153.2846  | 159.9174  | 165.7608  |
| Frequencies -- | 172.8260  | 185.4552  | 189.4980  |
| Frequencies -- | 204.4391  | 208.7141  | 212.0351  |
| Frequencies -- | 224.0238  | 224.8871  | 237.2596  |
| Frequencies -- | 238.6426  | 253.3733  | 255.2672  |
| Frequencies -- | 263.9606  | 269.1688  | 277.0489  |
| Frequencies -- | 284.7897  | 288.3313  | 291.0816  |
| Frequencies -- | 295.7748  | 297.2488  | 302.0398  |
| Frequencies -- | 302.5828  | 311.8416  | 322.1986  |
| Frequencies -- | 330.3547  | 331.9646  | 349.1897  |
| Frequencies -- | 373.8439  | 382.6111  | 393.0550  |
| Frequencies -- | 407.0860  | 421.4898  | 428.1771  |
| Frequencies -- | 431.3735  | 435.6660  | 459.4945  |
| Frequencies -- | 501.4589  | 533.7279  | 539.5324  |
| Frequencies -- | 540.2652  | 545.2116  | 547.9062  |
| Frequencies -- | 555.1588  | 580.5523  | 586.2726  |
| Frequencies -- | 592.8698  | 595.4041  | 605.3598  |
| Frequencies -- | 610.8309  | 617.4916  | 630.2814  |
| Frequencies -- | 634.0284  | 684.1102  | 688.2640  |
| Frequencies -- | 716.1769  | 721.3155  | 726.2776  |
| Frequencies -- | 763.3821  | 797.6182  | 801.3356  |
| Frequencies -- | 807.1478  | 813.5796  | 873.3356  |
| Frequencies -- | 887.4787  | 912.6840  | 918.8208  |
| Frequencies -- | 928.7487  | 930.2817  | 942.2836  |
| Frequencies -- | 962.1934  | 963.1276  | 968.9268  |
| Frequencies -- | 971.7063  | 985.5254  | 995.2727  |
| Frequencies -- | 1038.7826 | 1042.1944 | 1046.3627 |
| Frequencies -- | 1049.2578 | 1049.8145 | 1051.4350 |
| Frequencies -- | 1057.7863 | 1074.2915 | 1087.4161 |
| Frequencies -- | 1088.4130 | 1112.9799 | 1116.8964 |
| Frequencies -- | 1121.5899 | 1124.7524 | 1165.6098 |
| Frequencies -- | 1174.3416 | 1176.5374 | 1181.0390 |
| Frequencies -- | 1184.6306 | 1188.4210 | 1191.8337 |
| Frequencies -- | 1204.1871 | 1260.5663 | 1279.7970 |
| Frequencies -- | 1285.0157 | 1302.1837 | 1324.6207 |
| Frequencies -- | 1334.5051 | 1345.8547 | 1348.8073 |
| Frequencies -- | 1385.3925 | 1392.0512 | 1394.9581 |
| Frequencies -- | 1399.5457 | 1411.2535 | 1412.0335 |
| Frequencies -- | 1413.8483 | 1417.6808 | 1422.4858 |
| Frequencies -- | 1424.8715 | 1428.5104 | 1430.8274 |
| Frequencies -- | 1432.0600 | 1439.4748 | 1441.7398 |
| Frequencies -- | 1451.1242 | 1455.1679 | 1457.6001 |
| Frequencies -- | 1460.1061 | 1463.6507 | 1473.5526 |
| Frequencies -- | 1481.0434 | 1485.4807 | 1488.2891 |
| Frequencies -- | 1489.7481 | 1490.2072 | 1492.7988 |
| Frequencies -- | 1493.7909 | 1499.7531 | 1500.4554 |
| Frequencies -- | 1501.7695 | 1504.3578 | 1505.2790 |
| Frequencies -- | 1506.7230 | 1509.2076 | 1510.0608 |
| Frequencies -- | 1513.2556 | 1515.5228 | 1516.5034 |
| Frequencies -- | 1588.5114 | 1597.0659 | 1602.3108 |
| Frequencies -- | 1609.2376 | 2997.2295 | 3004.4510 |
| Frequencies -- | 3004.6637 | 3005.6084 | 3006.3647 |
| Frequencies -- | 3006.8965 | 3007.7816 | 3008.9985 |
| Frequencies -- | 3010.5679 | 3011.2619 | 3097.2523 |
| Frequencies -- | 3098.9683 | 3100.7978 | 3101.8118 |
| Frequencies -- | 3103.2715 | 3105.3876 | 3105.7568 |
| Frequencies -- | 3106.8955 | 3108.8109 | 3113.2183 |
| Frequencies -- | 3115.1314 | 3117.8417 | 3119.0020 |
| Frequencies -- | 3125.0924 | 3137.6594 | 3142.0348 |
| Frequencies -- | 3146.0396 | 3149.2359 | 3154.7119 |
| Frequencies -- | 3159.4139 | 3160.7171 | 3161.9633 |

Frequencies -- 3175.5036

3182.9074

3196.4149

**Catalyst 13:****distal conformation**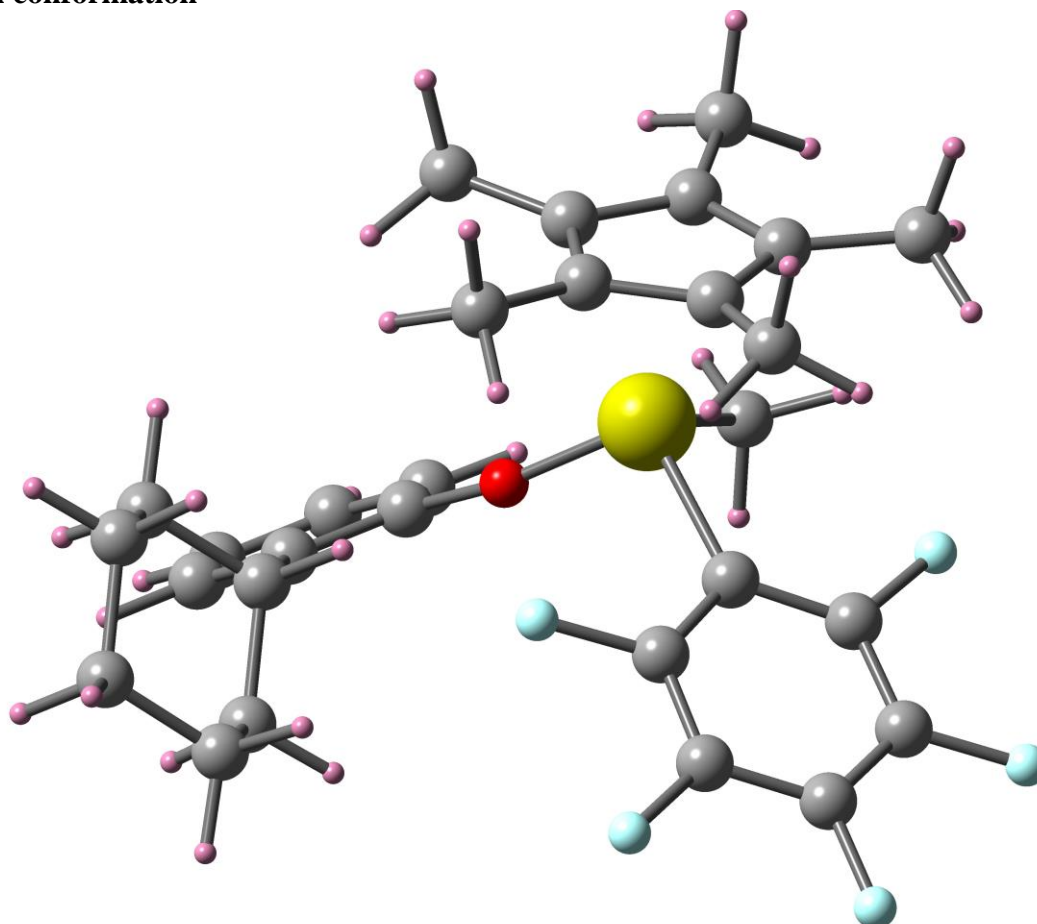

| <b>vacuum</b> | <b>toluene-like solvent</b> | <b>D3 dispersion</b> |
|---------------|-----------------------------|----------------------|
| -1756.9449824 | -1756.9501881               | -0.44199992          |

|    |             |             |             |
|----|-------------|-------------|-------------|
| Ti | 0.70442800  | -1.21981200 | 0.21943000  |
| C  | 1.32273300  | -2.24493800 | 1.93704300  |
| H  | 1.16560400  | -1.49508600 | 2.73541700  |
| H  | 0.72625200  | -3.14000200 | 2.16593000  |
| H  | 2.38651700  | -2.51536800 | 1.89559700  |
| O  | -0.95416300 | -0.84124900 | 0.81037400  |
| C  | -2.18228900 | -0.93283700 | 1.46169000  |
| C  | -3.30727000 | -0.14339000 | 1.06987600  |
| C  | -2.26963600 | -1.83282600 | 2.55780700  |
| C  | -4.49581900 | -0.30592100 | 1.83104200  |
| C  | -3.46484800 | -1.96877100 | 3.28398900  |
| C  | -4.58908500 | -1.19719000 | 2.91688800  |
| H  | -5.37255700 | 0.28622800  | 1.56528800  |
| H  | -3.51431200 | -2.66279200 | 4.12606200  |
| C  | 0.45571600  | -1.59278000 | -2.12450500 |
| C  | 1.88653800  | -1.44651700 | -1.95388700 |
| C  | 0.04138400  | -2.79157000 | -1.42779100 |
| C  | 2.35457400  | -2.55770300 | -1.16183300 |



|                |             |             |             |
|----------------|-------------|-------------|-------------|
| C              | 1.22116000  | -3.39016000 | -0.83667000 |
| C              | 1.78635900  | 0.69333400  | 0.34905800  |
| C              | 3.02199000  | 0.85851900  | 1.00047500  |
| C              | 1.23320500  | 1.89146900  | -0.13153600 |
| C              | 3.65699600  | 2.10173900  | 1.19707500  |
| F              | 3.71356200  | -0.26679200 | 1.49381700  |
| C              | 1.81136000  | 3.16479000  | 0.02997900  |
| F              | 0.01767100  | 1.85043400  | -0.84893500 |
| C              | 3.04058500  | 3.26905900  | 0.70825900  |
| F              | 4.88084600  | 2.19481000  | 1.85515500  |
| F              | 1.19984600  | 4.31138000  | -0.47256500 |
| F              | 3.64285100  | 4.50749100  | 0.88393500  |
| C              | -0.41555700 | -0.74810200 | -3.02611600 |
| H              | -0.35290400 | -1.12424000 | -4.06274800 |
| H              | -1.47228200 | -0.78204500 | -2.73307200 |
| H              | -0.10873800 | 0.30521300  | -3.04076900 |
| C              | 2.76026400  | -0.43495900 | -2.66084000 |
| H              | 3.11343700  | -0.85071200 | -3.62120300 |
| H              | 2.21981800  | 0.49292000  | -2.88773200 |
| H              | 3.65028500  | -0.16830600 | -2.07536800 |
| C              | -1.34904900 | -3.38790400 | -1.45206800 |
| H              | -2.11910800 | -2.60659800 | -1.48690600 |
| H              | -1.47823400 | -4.02447700 | -2.34477900 |
| H              | -1.55291700 | -4.01213900 | -0.57149200 |
| C              | 3.79813500  | -2.86106600 | -0.83324900 |
| H              | 4.25372900  | -3.45489200 | -1.64577300 |
| H              | 4.40085000  | -1.95099600 | -0.71714400 |
| H              | 3.90106000  | -3.44558300 | 0.09070600  |
| C              | 1.28267400  | -4.74756400 | -0.17568300 |
| H              | 0.33174400  | -5.02269800 | 0.30025000  |
| H              | 1.50436000  | -5.52122800 | -0.93174900 |
| H              | 2.06808100  | -4.80555900 | 0.58914400  |
| H              | -1.39157300 | -2.41151000 | 2.83487700  |
| H              | -5.52538600 | -1.28655400 | 3.47161000  |
| C              | -3.26613600 | 0.85777300  | -0.08861100 |
| C              | -4.35922600 | 0.57137700  | -1.16646400 |
| C              | -3.38919100 | 2.33000700  | 0.42239900  |
| H              | -2.28876700 | 0.77037600  | -0.57888000 |
| C              | -4.30316300 | 1.59508500  | -2.32940300 |
| H              | -5.36112100 | 0.61463300  | -0.70692900 |
| H              | -4.24087000 | -0.45427400 | -1.55741300 |
| C              | -3.34899600 | 3.35531500  | -0.73910000 |
| H              | -4.33414900 | 2.44904600  | 0.98060100  |
| H              | -2.57335300 | 2.53834900  | 1.13389600  |
| C              | -4.42174500 | 3.05074200  | -1.81372100 |
| H              | -5.11199100 | 1.37993600  | -3.04942100 |
| H              | -3.35122600 | 1.48069000  | -2.87894000 |
| H              | -3.49697500 | 4.37189900  | -0.33556200 |
| H              | -2.34839500 | 3.34302200  | -1.20340600 |
| H              | -4.32550100 | 3.75862800  | -2.65488100 |
| H              | -5.42845900 | 3.20401900  | -1.38292200 |
| Frequencies -- | -11.7539    | 20.2504     | 22.7602     |
| Frequencies -- | 32.8343     | 44.5048     | 50.4669     |
| Frequencies -- | 55.3457     | 70.1067     | 76.7742     |
| Frequencies -- | 78.2852     | 90.8342     | 100.2318    |
| Frequencies -- | 113.1487    | 116.2057    | 125.1524    |

|                |           |           |           |
|----------------|-----------|-----------|-----------|
| Frequencies -- | 127.9831  | 135.1110  | 139.8427  |
| Frequencies -- | 141.9366  | 144.2349  | 153.5452  |
| Frequencies -- | 158.1993  | 169.0868  | 172.2227  |
| Frequencies -- | 177.6779  | 183.1970  | 203.6954  |
| Frequencies -- | 206.1885  | 222.4110  | 232.6132  |
| Frequencies -- | 240.1997  | 264.0563  | 264.6245  |
| Frequencies -- | 271.4577  | 274.0848  | 278.5680  |
| Frequencies -- | 283.5263  | 289.8235  | 292.3684  |
| Frequencies -- | 297.4872  | 300.2659  | 312.0537  |
| Frequencies -- | 324.2497  | 335.3038  | 344.7265  |
| Frequencies -- | 357.4509  | 381.6294  | 384.2651  |
| Frequencies -- | 391.2320  | 411.8480  | 428.7189  |
| Frequencies -- | 436.8009  | 442.3547  | 461.2146  |
| Frequencies -- | 494.5519  | 496.5094  | 504.4612  |
| Frequencies -- | 519.4485  | 535.3665  | 539.0999  |
| Frequencies -- | 544.0582  | 552.9130  | 556.3809  |
| Frequencies -- | 576.8216  | 583.8467  | 594.7821  |
| Frequencies -- | 605.2826  | 616.9480  | 618.7142  |
| Frequencies -- | 633.4841  | 650.4789  | 685.0046  |
| Frequencies -- | 690.0998  | 721.3645  | 728.2664  |
| Frequencies -- | 745.0736  | 765.8746  | 768.9304  |
| Frequencies -- | 791.0750  | 801.0404  | 802.3692  |
| Frequencies -- | 819.5926  | 866.9431  | 867.5066  |
| Frequencies -- | 885.0765  | 887.2069  | 902.9422  |
| Frequencies -- | 923.9781  | 927.2416  | 957.0149  |
| Frequencies -- | 965.7669  | 969.4284  | 988.7205  |
| Frequencies -- | 994.6797  | 999.9506  | 1038.0201 |
| Frequencies -- | 1042.6887 | 1045.3536 | 1047.7554 |
| Frequencies -- | 1049.3039 | 1050.2861 | 1055.4122 |
| Frequencies -- | 1056.5612 | 1059.2556 | 1086.5245 |
| Frequencies -- | 1087.6616 | 1088.0984 | 1096.7655 |
| Frequencies -- | 1116.7067 | 1123.3420 | 1153.6004 |
| Frequencies -- | 1173.0844 | 1176.7248 | 1177.9586 |
| Frequencies -- | 1183.9079 | 1189.5770 | 1191.4511 |
| Frequencies -- | 1200.9255 | 1224.3126 | 1251.5051 |
| Frequencies -- | 1279.1934 | 1282.2331 | 1287.4643 |
| Frequencies -- | 1296.0776 | 1320.3982 | 1331.6667 |
| Frequencies -- | 1353.7525 | 1355.7139 | 1357.6816 |
| Frequencies -- | 1360.6336 | 1363.5343 | 1370.5217 |
| Frequencies -- | 1391.8755 | 1394.7383 | 1409.7681 |
| Frequencies -- | 1411.4300 | 1422.3275 | 1423.1449 |
| Frequencies -- | 1427.0079 | 1430.2869 | 1431.4402 |
| Frequencies -- | 1437.2682 | 1446.2132 | 1450.2903 |
| Frequencies -- | 1451.7032 | 1454.8303 | 1459.5678 |
| Frequencies -- | 1462.4837 | 1479.3659 | 1480.2126 |
| Frequencies -- | 1482.0159 | 1486.1380 | 1486.5137 |
| Frequencies -- | 1490.4825 | 1491.0233 | 1492.2058 |
| Frequencies -- | 1496.6078 | 1497.6185 | 1499.7553 |
| Frequencies -- | 1505.4304 | 1507.7337 | 1510.1199 |
| Frequencies -- | 1513.2412 | 1515.4396 | 1586.2268 |
| Frequencies -- | 1588.4980 | 1600.4735 | 1614.5470 |
| Frequencies -- | 2983.6386 | 2997.6399 | 3001.5594 |
| Frequencies -- | 3004.3238 | 3006.0524 | 3007.0071 |
| Frequencies -- | 3007.2115 | 3009.1178 | 3009.3649 |
| Frequencies -- | 3013.1999 | 3020.2027 | 3058.2586 |
| Frequencies -- | 3062.3519 | 3071.0021 | 3076.5297 |
| Frequencies -- | 3086.9830 | 3097.0987 | 3098.2158 |
| Frequencies -- | 3100.0757 | 3101.4910 | 3105.7767 |
| Frequencies -- | 3106.7048 | 3116.8188 | 3136.3798 |
| Frequencies -- | 3140.1272 | 3141.4387 | 3144.3210 |
| Frequencies -- | 3150.2518 | 3152.9060 | 3159.0407 |
| Frequencies -- | 3174.1586 | 3192.1195 | 3227.6067 |

**proximal conformation**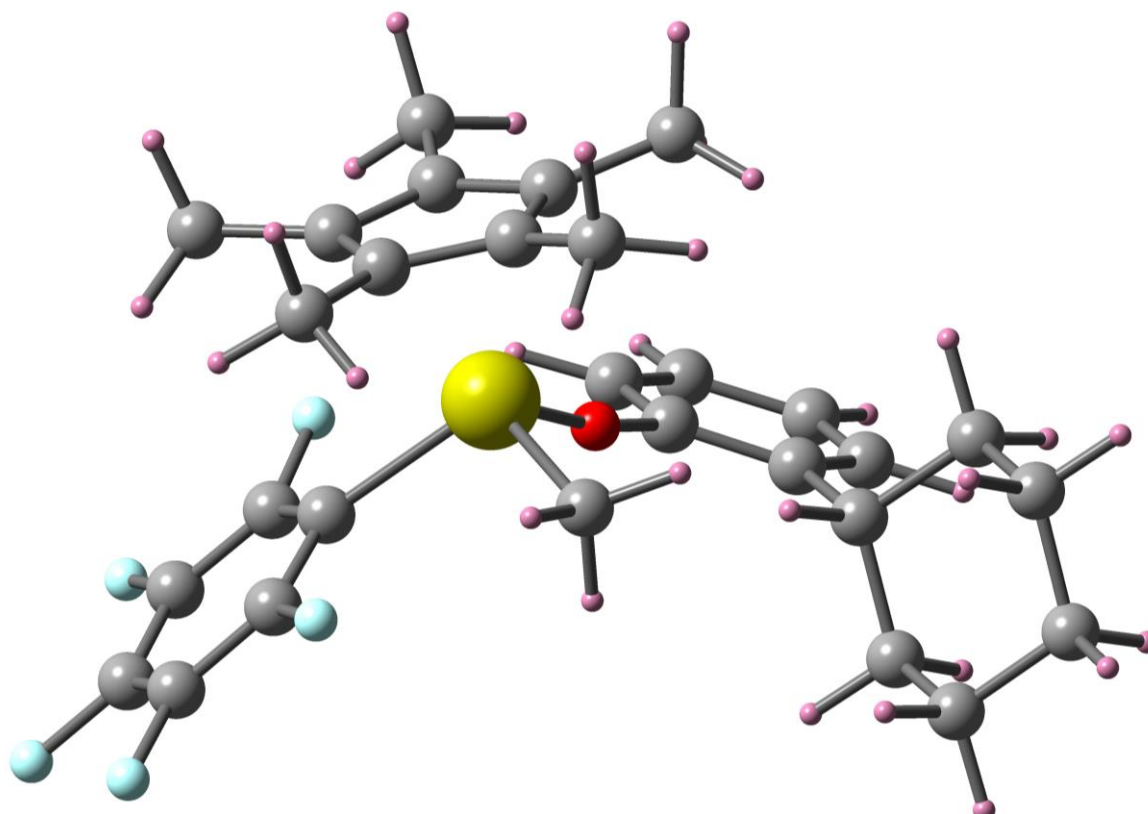

| <b>vacuum</b>  | <b>toluene-like solvent</b> | <b>D3 dispersion</b> |
|----------------|-----------------------------|----------------------|
| -1756.94686556 | -1756.9522621               | -0.44110865          |

|    |             |             |             |
|----|-------------|-------------|-------------|
| Ti | -0.27344067 | 0.85631843  | -0.01691334 |
| C  | 0.50660402  | 1.29285660  | 1.87316560  |
| H  | 0.54119052  | 0.29471180  | 2.34983308  |
| H  | 1.52402785  | 1.70991126  | 1.84452941  |
| H  | -0.14699005 | 1.95249094  | 2.45995875  |
| O  | 0.91812622  | -0.38877941 | -0.51985797 |
| C  | 1.79657354  | -1.26831034 | -1.14515020 |
| C  | 1.34552751  | -1.94384779 | -2.30919105 |
| C  | 3.10461941  | -1.50209894 | -0.61820526 |
| C  | 2.18791380  | -2.84624222 | -2.98179590 |
| C  | 3.92651075  | -2.41731864 | -1.32637995 |
| C  | 3.49092928  | -3.08084616 | -2.49005827 |
| H  | 1.82680924  | -3.36360721 | -3.87336917 |
| H  | 4.93153356  | -2.61945072 | -0.95254515 |
| C  | -1.81987081 | 2.27082096  | -1.34074051 |
| C  | -1.44767055 | 3.07811854  | -0.20271845 |
| C  | -0.61943965 | 1.98773046  | -2.09955448 |
| C  | -0.02392771 | 3.30218241  | -0.25416314 |
| C  | 0.49290350  | 2.61841538  | -1.42409371 |
| C  | -2.07081469 | -0.35198531 | 0.38634486  |
| C  | -2.78322982 | -0.30322624 | 1.59836642  |
| C  | -2.53597838 | -1.33258478 | -0.50618542 |
| C  | -3.85142276 | -1.16217935 | 1.92864300  |

|                |             |             |             |
|----------------|-------------|-------------|-------------|
| F              | -2.44948852 | 0.65928084  | 2.57311400  |
| C              | -3.59429191 | -2.22223232 | -0.24087033 |
| F              | -1.93969991 | -1.45020530 | -1.78144583 |
| C              | -4.25767652 | -2.13644486 | 0.99797245  |
| F              | -4.51157901 | -1.06146735 | 3.15091225  |
| F              | -4.00008376 | -3.17159358 | -1.17604327 |
| F              | -5.30696845 | -2.99611830 | 1.29363840  |
| C              | -3.23282714 | 1.96292902  | -1.78164584 |
| H              | -3.63328097 | 2.81011151  | -2.36624347 |
| H              | -3.28268201 | 1.07327069  | -2.42148033 |
| H              | -3.91149721 | 1.80452465  | -0.93328226 |
| C              | -2.39819677 | 3.68385094  | 0.80451600  |
| H              | -2.69048173 | 4.70065400  | 0.48664857  |
| H              | -3.32035477 | 3.09836442  | 0.91130021  |
| H              | -1.94707034 | 3.77331436  | 1.80203860  |
| C              | -0.56832538 | 1.32020995  | -3.45553593 |
| H              | -1.30654126 | 0.51415726  | -3.55358707 |
| H              | -0.78542704 | 2.06186689  | -4.24456250 |
| H              | 0.42017427  | 0.89613838  | -3.67278243 |
| C              | 0.74827255  | 4.25930099  | 0.62358652  |
| H              | 0.66353463  | 5.28396724  | 0.22078331  |
| H              | 0.36832628  | 4.28286250  | 1.65349588  |
| H              | 1.81806674  | 4.01567835  | 0.66898367  |
| C              | 1.91279359  | 2.69891471  | -1.94049361 |
| H              | 2.20644274  | 1.79821421  | -2.49583651 |
| H              | 2.01666752  | 3.55678031  | -2.62830984 |
| H              | 2.64250302  | 2.84333411  | -1.13203066 |
| H              | 4.15635381  | -3.77915885 | -3.00189579 |
| H              | 0.33292685  | -1.76571545 | -2.66081825 |
| C              | 3.60830547  | -0.82983690 | 0.66182999  |
| C              | 3.87338086  | -1.86741940 | 1.79922935  |
| C              | 4.87965766  | 0.04401978  | 0.42359976  |
| H              | 2.81703394  | -0.15944260 | 1.01896840  |
| C              | 4.35930351  | -1.18477030 | 3.10252830  |
| H              | 4.63303432  | -2.59608175 | 1.46763564  |
| H              | 2.95128592  | -2.44009068 | 1.99452016  |
| C              | 5.35948262  | 0.72753598  | 1.72894691  |
| H              | 5.69637760  | -0.58198870 | 0.02515621  |
| H              | 4.66426611  | 0.80481942  | -0.34572841 |
| C              | 5.60906738  | -0.30263166 | 2.85874855  |
| H              | 4.58193685  | -1.95520059 | 3.86086385  |
| H              | 3.54667116  | -0.56079948 | 3.51657302  |
| H              | 6.28130616  | 1.30120038  | 1.52938311  |
| H              | 4.59943550  | 1.45669683  | 2.06487199  |
| H              | 5.89246947  | 0.21815939  | 3.78946230  |
| H              | 6.46397259  | -0.94699304 | 2.58266908  |
| Frequencies -- | 16.1595     | 17.4747     | 23.1795     |
| Frequencies -- | 33.7819     | 39.4064     | 47.9913     |
| Frequencies -- | 57.1961     | 69.0601     | 83.1218     |
| Frequencies -- | 85.1165     | 100.7441    | 109.7461    |
| Frequencies -- | 113.6826    | 114.5582    | 119.0302    |
| Frequencies -- | 121.5502    | 128.4413    | 140.4363    |
| Frequencies -- | 145.6196    | 153.1692    | 154.1831    |
| Frequencies -- | 156.2656    | 158.2117    | 168.0425    |
| Frequencies -- | 173.0419    | 192.6408    | 204.8136    |
| Frequencies -- | 215.8043    | 224.4880    | 225.9396    |
| Frequencies -- | 234.7042    | 244.2656    | 264.9768    |

|                |           |           |           |
|----------------|-----------|-----------|-----------|
| Frequencies -- | 266.2907  | 269.4953  | 279.6535  |
| Frequencies -- | 286.4587  | 291.0036  | 296.1003  |
| Frequencies -- | 298.5199  | 301.8343  | 313.4829  |
| Frequencies -- | 322.6256  | 338.5224  | 344.6491  |
| Frequencies -- | 355.8226  | 381.8268  | 384.4446  |
| Frequencies -- | 389.1360  | 411.5177  | 428.3395  |
| Frequencies -- | 437.9154  | 440.4892  | 460.7307  |
| Frequencies -- | 496.6028  | 500.0070  | 503.8447  |
| Frequencies -- | 522.8683  | 535.0389  | 540.0468  |
| Frequencies -- | 543.5661  | 554.0909  | 557.3164  |
| Frequencies -- | 570.0847  | 584.0774  | 594.7147  |
| Frequencies -- | 605.1581  | 613.7584  | 618.6212  |
| Frequencies -- | 633.1358  | 647.5199  | 683.0754  |
| Frequencies -- | 687.9299  | 720.9678  | 726.8803  |
| Frequencies -- | 746.4958  | 768.9421  | 770.4275  |
| Frequencies -- | 792.1116  | 801.9444  | 804.0477  |
| Frequencies -- | 820.5065  | 865.2662  | 872.2331  |
| Frequencies -- | 884.9907  | 888.0762  | 905.9712  |
| Frequencies -- | 925.2327  | 932.6759  | 959.5393  |
| Frequencies -- | 968.6274  | 970.0282  | 989.7055  |
| Frequencies -- | 994.6571  | 998.8366  | 1037.5101 |
| Frequencies -- | 1043.5154 | 1044.7756 | 1048.6227 |
| Frequencies -- | 1049.0097 | 1050.9395 | 1052.3142 |
| Frequencies -- | 1055.1691 | 1062.5714 | 1084.7523 |
| Frequencies -- | 1086.5187 | 1087.7491 | 1095.8765 |
| Frequencies -- | 1115.0873 | 1123.6684 | 1154.3377 |
| Frequencies -- | 1171.4517 | 1173.5550 | 1177.2181 |
| Frequencies -- | 1184.7435 | 1189.4191 | 1192.8009 |
| Frequencies -- | 1201.3020 | 1231.2704 | 1249.0441 |
| Frequencies -- | 1279.9492 | 1280.4089 | 1286.4128 |
| Frequencies -- | 1295.8647 | 1315.4087 | 1330.7852 |
| Frequencies -- | 1352.5566 | 1354.6043 | 1359.5691 |
| Frequencies -- | 1360.5360 | 1364.0560 | 1369.3493 |
| Frequencies -- | 1387.0920 | 1394.1293 | 1410.7941 |
| Frequencies -- | 1412.4547 | 1423.0959 | 1423.7373 |
| Frequencies -- | 1427.0414 | 1430.3015 | 1431.6462 |
| Frequencies -- | 1435.0318 | 1440.6113 | 1448.3119 |
| Frequencies -- | 1450.8857 | 1454.5725 | 1458.6400 |
| Frequencies -- | 1463.4824 | 1480.3865 | 1482.5342 |
| Frequencies -- | 1482.8241 | 1486.6010 | 1486.9807 |
| Frequencies -- | 1491.5835 | 1492.1989 | 1492.9996 |
| Frequencies -- | 1498.4997 | 1499.6599 | 1500.2590 |
| Frequencies -- | 1504.8071 | 1507.9467 | 1512.0377 |
| Frequencies -- | 1513.4055 | 1516.0274 | 1586.2376 |
| Frequencies -- | 1588.2266 | 1600.0862 | 1614.7073 |
| Frequencies -- | 2981.9558 | 2997.9587 | 3001.0871 |
| Frequencies -- | 3004.2647 | 3004.4967 | 3005.1399 |
| Frequencies -- | 3006.6291 | 3007.7617 | 3008.9102 |
| Frequencies -- | 3011.4147 | 3016.0529 | 3058.7561 |
| Frequencies -- | 3061.6443 | 3067.9468 | 3075.9155 |
| Frequencies -- | 3080.5679 | 3096.6619 | 3098.0548 |
| Frequencies -- | 3098.9982 | 3101.7516 | 3104.0899 |
| Frequencies -- | 3105.2913 | 3113.3042 | 3136.2234 |
| Frequencies -- | 3140.3021 | 3141.8409 | 3146.0661 |
| Frequencies -- | 3149.7201 | 3150.6992 | 3159.0115 |
| Frequencies -- | 3172.8304 | 3190.8193 | 3242.9616 |

**Catalyst 14:**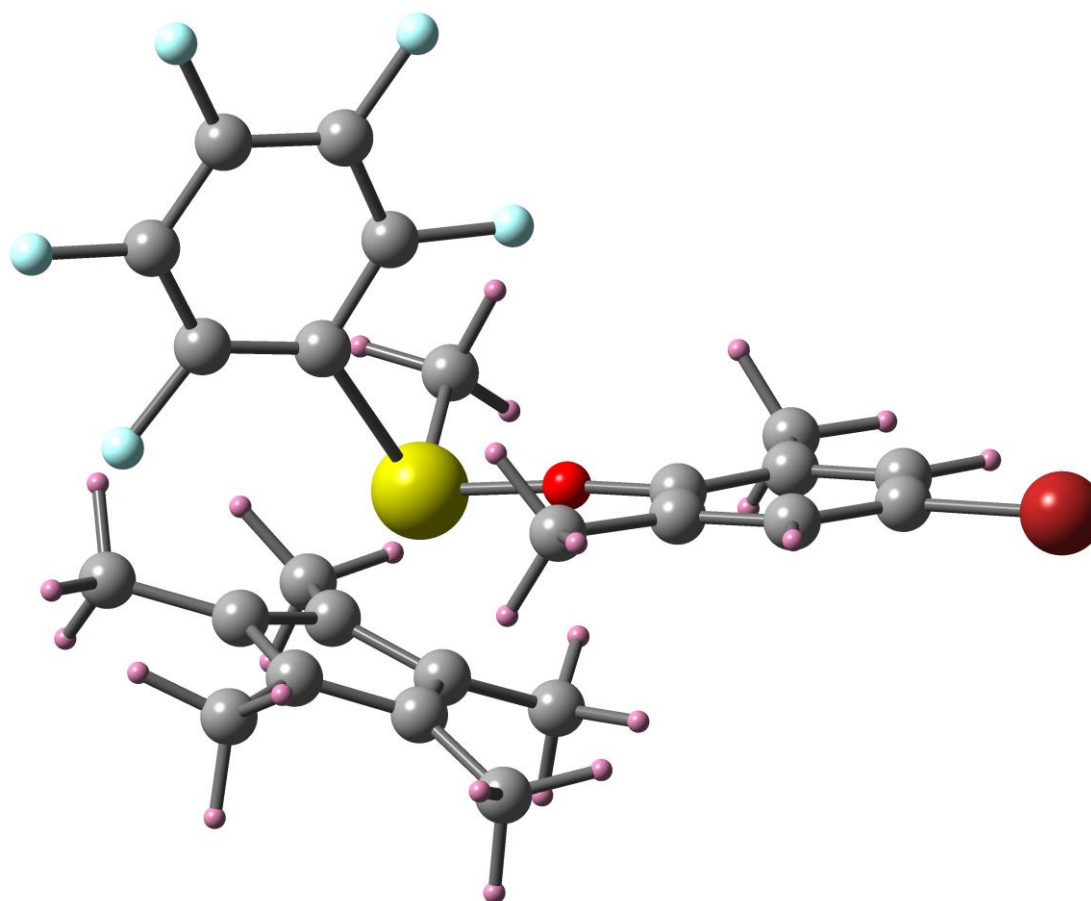

| <b>vacuum</b> | <b>toluene-like solvent</b> | <b>D3 dispersion</b> |
|---------------|-----------------------------|----------------------|
| -1613.5386978 | -1613.5442815               | -0.38337887          |

|    |             |             |             |
|----|-------------|-------------|-------------|
| Ti | -1.15453700 | -0.99148000 | -0.41963100 |
| C  | -1.45430300 | -1.10020500 | -2.48821400 |
| H  | -0.99802500 | -0.18242900 | -2.88906600 |
| H  | -0.99930600 | -1.97261000 | -2.97913800 |
| H  | -2.53717200 | -1.09503900 | -2.69611400 |
| O  | 0.57422000  | -0.53213500 | -0.32859500 |
| C  | 1.91111900  | -0.22374700 | -0.14964300 |
| C  | 2.31577300  | 0.48579800  | 1.02148300  |
| C  | 2.84772300  | -0.58639900 | -1.16383300 |
| C  | 3.68785600  | 0.78802200  | 1.18404500  |
| C  | 4.21148100  | -0.27023700 | -0.96304300 |
| C  | 4.61899200  | 0.40031800  | 0.20403600  |
| H  | 4.01412700  | 1.32900500  | 2.07172100  |
| H  | 4.93993200  | -0.54257100 | -1.72607200 |
| C  | -2.08431500 | -2.21966600 | 1.49789800  |
| C  | -3.03745300 | -2.43551100 | 0.43066000  |
| C  | -0.83327100 | -2.83922900 | 1.10948100  |
| C  | -2.37314600 | -3.18549800 | -0.61089400 |
| C  | -1.01509200 | -3.43536800 | -0.19092900 |
| F  | -3.39603000 | 5.14181500  | -0.20929400 |

|    |             |             |             |
|----|-------------|-------------|-------------|
| C  | -2.95415200 | 3.82700400  | -0.20115600 |
| C  | -3.60226600 | 2.86035400  | 0.58598800  |
| C  | -1.84724500 | 3.43930000  | -0.97654200 |
| C  | -3.12955400 | 1.53167000  | 0.56908100  |
| F  | -4.69526300 | 3.22816100  | 1.36747900  |
| C  | -1.42431400 | 2.09489100  | -0.94469700 |
| F  | -1.19085400 | 4.38614400  | -1.75809500 |
| C  | -2.03389000 | 1.06667300  | -0.18616500 |
| F  | -3.84434700 | 0.65203500  | 1.40239800  |
| F  | -0.30067500 | 1.81971400  | -1.74796800 |
| C  | 1.31558500  | 0.93934300  | 2.07008800  |
| H  | 0.52076100  | 1.55317900  | 1.62274200  |
| H  | 0.82711600  | 0.08533200  | 2.56135400  |
| H  | 1.80840700  | 1.53654700  | 2.84925200  |
| C  | 2.41099200  | -1.26359200 | -2.45036900 |
| H  | 1.91270200  | -2.22453400 | -2.25894700 |
| H  | 1.69588900  | -0.63330400 | -2.99924700 |
| H  | 3.27232500  | -1.45214900 | -3.10554100 |
| Br | 6.52684700  | 0.82030200  | 0.46228300  |
| C  | -2.36254900 | -1.66446700 | 2.87854200  |
| H  | -3.33415300 | -1.16639300 | 2.93703400  |
| H  | -2.36081900 | -2.48779500 | 3.61395100  |
| H  | -1.60368300 | -0.93905000 | 3.20845200  |
| C  | -4.52545400 | -2.15578900 | 0.44010300  |
| H  | -4.84059500 | -1.61069600 | 1.33434100  |
| H  | -4.85416400 | -1.57075400 | -0.43265300 |
| H  | -5.07965700 | -3.10972700 | 0.41481400  |
| C  | 0.37758600  | -3.02313500 | 1.99693100  |
| H  | 0.41374000  | -2.28432000 | 2.80712500  |
| H  | 0.34560400  | -4.01998800 | 2.47092400  |
| H  | 1.32360400  | -2.95786800 | 1.44237700  |
| C  | -3.05813000 | -3.79912400 | -1.80901700 |
| H  | -3.47517800 | -4.78472500 | -1.53550900 |
| H  | -3.89219200 | -3.18317300 | -2.17138500 |
| H  | -2.37097900 | -3.96010400 | -2.64994600 |
| C  | -0.00830900 | -4.29691000 | -0.91828700 |
| H  | -0.17630600 | -5.36033700 | -0.67157100 |
| H  | -0.08773000 | -4.20567500 | -2.01084500 |
| H  | 1.02469800  | -4.05953700 | -0.63126600 |

|                |          |          |          |
|----------------|----------|----------|----------|
| Frequencies -- | 13.7534  | 16.3666  | 28.5943  |
| Frequencies -- | 32.6628  | 41.7769  | 63.6783  |
| Frequencies -- | 65.8404  | 77.7178  | 84.8571  |
| Frequencies -- | 89.6134  | 99.2107  | 102.6269 |
| Frequencies -- | 110.8285 | 114.7300 | 126.0833 |
| Frequencies -- | 133.7553 | 136.5582 | 139.3952 |
| Frequencies -- | 144.5354 | 149.0037 | 152.9004 |
| Frequencies -- | 160.5809 | 169.1973 | 172.0837 |
| Frequencies -- | 179.0295 | 181.0908 | 190.6457 |
| Frequencies -- | 202.4133 | 214.6024 | 227.0907 |
| Frequencies -- | 228.4915 | 240.4881 | 246.3266 |
| Frequencies -- | 258.9240 | 261.7473 | 264.9133 |
| Frequencies -- | 274.3217 | 282.7730 | 284.7402 |
| Frequencies -- | 293.3081 | 296.0883 | 305.6131 |
| Frequencies -- | 323.2103 | 339.3161 | 346.6904 |
| Frequencies -- | 355.7873 | 380.2268 | 383.7868 |
| Frequencies -- | 390.9505 | 398.5795 | 424.4354 |
| Frequencies -- | 431.0283 | 457.9560 | 501.8079 |

|                |           |           |           |
|----------------|-----------|-----------|-----------|
| Frequencies -- | 504.7365  | 508.3759  | 533.4090  |
| Frequencies -- | 538.6602  | 546.4088  | 555.3641  |
| Frequencies -- | 560.5683  | 565.6947  | 572.2808  |
| Frequencies -- | 585.1199  | 591.8672  | 595.9892  |
| Frequencies -- | 602.5181  | 608.7541  | 638.5007  |
| Frequencies -- | 681.5462  | 687.8664  | 713.5782  |
| Frequencies -- | 734.8643  | 736.0319  | 795.2720  |
| Frequencies -- | 798.5297  | 808.3229  | 883.4621  |
| Frequencies -- | 885.5822  | 891.2010  | 924.8758  |
| Frequencies -- | 950.1387  | 965.3185  | 972.1945  |
| Frequencies -- | 999.1625  | 1012.8553 | 1040.0065 |
| Frequencies -- | 1041.0521 | 1042.1205 | 1046.8676 |
| Frequencies -- | 1048.1455 | 1050.4113 | 1051.6814 |
| Frequencies -- | 1054.7569 | 1057.3188 | 1085.8814 |
| Frequencies -- | 1086.5079 | 1122.5269 | 1126.2689 |
| Frequencies -- | 1173.3249 | 1176.4844 | 1180.7500 |
| Frequencies -- | 1188.9822 | 1226.1346 | 1264.3495 |
| Frequencies -- | 1277.2309 | 1289.7359 | 1340.3651 |
| Frequencies -- | 1353.4365 | 1386.0872 | 1409.4635 |
| Frequencies -- | 1413.1497 | 1413.9296 | 1419.7177 |
| Frequencies -- | 1422.2069 | 1423.6560 | 1424.6194 |
| Frequencies -- | 1426.2392 | 1431.9550 | 1433.0263 |
| Frequencies -- | 1433.5052 | 1439.2067 | 1450.5331 |
| Frequencies -- | 1452.0556 | 1457.4193 | 1462.2212 |
| Frequencies -- | 1465.2375 | 1481.0800 | 1485.5102 |
| Frequencies -- | 1486.1759 | 1491.1973 | 1494.4370 |
| Frequencies -- | 1496.5879 | 1500.2996 | 1501.7940 |
| Frequencies -- | 1502.1680 | 1505.0371 | 1506.1890 |
| Frequencies -- | 1510.5913 | 1513.6407 | 1521.0817 |
| Frequencies -- | 1587.7493 | 1588.0002 | 1592.3010 |
| Frequencies -- | 1598.1707 | 2998.8996 | 3003.1581 |
| Frequencies -- | 3005.3850 | 3007.8416 | 3010.4853 |
| Frequencies -- | 3011.8874 | 3029.6384 | 3031.0521 |
| Frequencies -- | 3085.6665 | 3090.5267 | 3091.2308 |
| Frequencies -- | 3096.7058 | 3098.9437 | 3119.6994 |
| Frequencies -- | 3120.9111 | 3121.6146 | 3133.8929 |
| Frequencies -- | 3135.3442 | 3136.8398 | 3137.3092 |
| Frequencies -- | 3141.5691 | 3145.5810 | 3171.0110 |
| Frequencies -- | 3178.8494 | 3197.6296 | 3199.9327 |



**Catalyst 15:****distal conformation**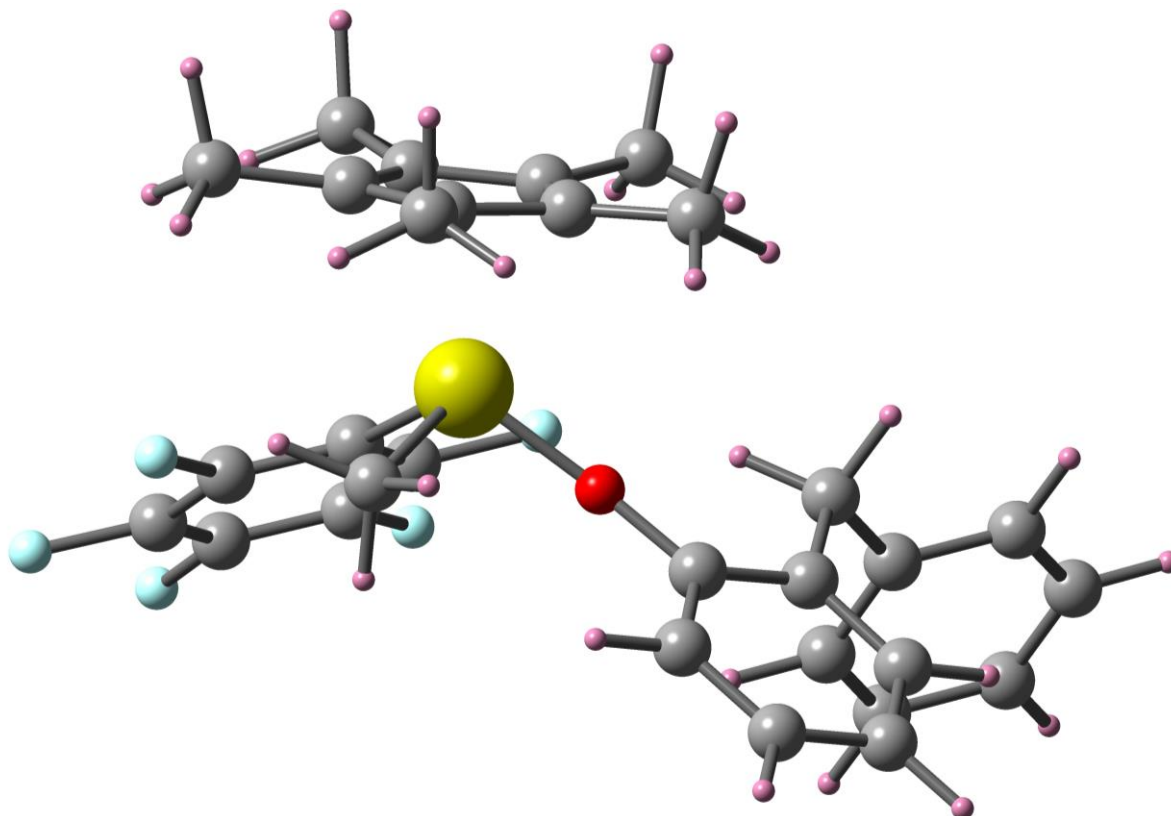

| <b>vacuum</b> | <b>toluene-like solvent</b> | <b>D3 dispersion</b> |
|---------------|-----------------------------|----------------------|
| -1792.6401817 | -1792.6473911               | -0.43045411          |

|    |             |             |             |
|----|-------------|-------------|-------------|
| Ti | 1.25661100  | -1.03106900 | 0.21898300  |
| C  | 2.08931800  | -1.72374700 | 2.00943500  |
| H  | 1.67059500  | -1.02028100 | 2.75409800  |
| H  | 1.77962900  | -2.74670300 | 2.27096800  |
| H  | 3.18531900  | -1.65626200 | 2.02304100  |
| O  | -0.45845200 | -1.20755900 | 0.73319300  |
| C  | -1.63773100 | -1.62687600 | 1.33820900  |
| C  | -2.91382400 | -1.35359500 | 0.76029300  |
| C  | -1.53394700 | -2.32431300 | 2.57083100  |
| C  | -4.05702100 | -1.81311500 | 1.46193500  |
| C  | -2.68747100 | -2.76746600 | 3.24093700  |
| C  | -3.95911500 | -2.51157400 | 2.68154000  |
| H  | -5.04280100 | -1.60523600 | 1.04341800  |
| H  | -2.59302300 | -3.30146700 | 4.18914500  |
| C  | 2.51917000  | -0.92605600 | -1.92037100 |
| C  | 3.32139600  | -1.75810700 | -1.05719100 |
| C  | 1.23997200  | -1.58013900 | -2.10761500 |
| C  | 2.54491300  | -2.92148600 | -0.70197900 |
| C  | 1.25208700  | -2.81203600 | -1.34895600 |
| C  | 1.61331200  | 1.13869400  | 0.28884600  |

|   |             |             |             |
|---|-------------|-------------|-------------|
| C | 2.70047000  | 1.73009200  | 0.95687800  |
| C | 0.69603700  | 2.06412400  | -0.23639400 |
| C | 2.86864900  | 3.11918900  | 1.12711600  |
| F | 3.71757200  | 0.91777400  | 1.49927800  |
| C | 0.80179900  | 3.46176700  | -0.10264000 |
| F | -0.41639500 | 1.59502600  | -0.96821100 |
| C | 1.90400300  | 3.99424400  | 0.59300800  |
| F | 3.96858100  | 3.63898300  | 1.80487700  |
| F | -0.15080400 | 4.31966700  | -0.64639100 |
| F | 2.04241100  | 5.36740600  | 0.74306100  |
| C | -3.06009400 | -0.63822800 | -0.58705200 |
| H | -2.11721500 | -0.13308900 | -0.81986100 |
| H | -3.20682600 | -1.40515800 | -1.36779200 |
| C | 3.00078600  | 0.29430900  | -2.67161100 |
| H | 3.48510300  | -0.01386100 | -3.61523400 |
| H | 2.17833900  | 0.97189200  | -2.93514400 |
| H | 3.74006000  | 0.87141100  | -2.10078700 |
| C | 4.76452700  | -1.51194500 | -0.68263100 |
| H | 5.43358600  | -1.96671200 | -1.43487000 |
| H | 5.00503000  | -0.44250000 | -0.63394000 |
| H | 5.02306600  | -1.95326700 | 0.28926300  |
| C | 0.16212500  | -1.14095800 | -3.07262900 |
| H | 0.05472900  | -0.04949500 | -3.11825100 |
| H | 0.41030500  | -1.48901500 | -4.09100500 |
| H | -0.81930300 | -1.55980000 | -2.81832500 |
| C | 3.05970700  | -4.13690800 | 0.03348000  |
| H | 3.56540300  | -4.81520200 | -0.67622500 |
| H | 3.78949400  | -3.87808000 | 0.81164200  |
| H | 2.25188400  | -4.70884700 | 0.50934900  |
| C | 0.17819200  | -3.87758600 | -1.35875200 |
| H | -0.82036700 | -3.45781200 | -1.53669700 |
| H | 0.37573900  | -4.61031000 | -2.16097400 |
| H | 0.13476500  | -4.43491300 | -0.41253300 |
| H | -4.86403800 | -2.84744100 | 3.19198200  |
| H | -0.54730700 | -2.50667100 | 2.99147900  |
| C | -4.20664900 | 0.37172800  | -0.67758200 |
| C | -5.33239600 | 0.12866100  | -1.50263800 |
| C | -4.15520700 | 1.59436200  | 0.04082300  |
| C | -6.37993600 | 1.07182900  | -1.60629000 |
| H | -5.39181300 | -0.80259100 | -2.07256300 |
| C | -5.19720000 | 2.53916100  | -0.05752900 |
| H | -3.29466300 | 1.80848600  | 0.67886000  |
| C | -6.31622300 | 2.28152900  | -0.88225000 |
| H | -7.23763400 | 0.86290100  | -2.25056100 |
| H | -5.13352600 | 3.47634900  | 0.50083400  |
| H | -7.12252300 | 3.01465000  | -0.96134400 |

|                |          |          |          |
|----------------|----------|----------|----------|
| Frequencies -- | 7.3910   | 13.4609  | 19.6637  |
| Frequencies -- | 24.9957  | 29.6187  | 34.0073  |
| Frequencies -- | 43.5264  | 53.2533  | 67.4313  |
| Frequencies -- | 79.3217  | 94.5516  | 100.1748 |
| Frequencies -- | 109.2516 | 112.2353 | 118.0392 |
| Frequencies -- | 120.1864 | 122.6581 | 126.2616 |
| Frequencies -- | 132.5257 | 151.4509 | 156.7900 |
| Frequencies -- | 159.0649 | 163.4282 | 164.8107 |
| Frequencies -- | 171.5462 | 180.1436 | 187.1453 |
| Frequencies -- | 203.1342 | 213.7291 | 225.3622 |
| Frequencies -- | 246.3856 | 262.2200 | 264.5922 |

|                |           |           |           |
|----------------|-----------|-----------|-----------|
| Frequencies -- | 273.7099  | 279.9567  | 290.7259  |
| Frequencies -- | 292.5015  | 297.0124  | 301.3926  |
| Frequencies -- | 306.5740  | 311.2884  | 318.1191  |
| Frequencies -- | 328.1018  | 344.1461  | 353.8705  |
| Frequencies -- | 380.2484  | 383.6005  | 390.0860  |
| Frequencies -- | 407.2184  | 413.7520  | 428.4749  |
| Frequencies -- | 448.3543  | 460.7411  | 465.4697  |
| Frequencies -- | 484.8346  | 504.0298  | 534.6636  |
| Frequencies -- | 535.3860  | 540.2983  | 543.7081  |
| Frequencies -- | 555.4002  | 572.0553  | 576.6764  |
| Frequencies -- | 583.9761  | 594.7921  | 605.6846  |
| Frequencies -- | 616.9078  | 618.0429  | 624.5430  |
| Frequencies -- | 633.4703  | 644.8396  | 678.9677  |
| Frequencies -- | 688.5507  | 708.0622  | 721.7255  |
| Frequencies -- | 722.8723  | 729.0198  | 746.1342  |
| Frequencies -- | 767.2828  | 802.8540  | 804.2049  |
| Frequencies -- | 812.5688  | 826.6196  | 860.6900  |
| Frequencies -- | 871.8625  | 885.4674  | 923.4544  |
| Frequencies -- | 928.2569  | 945.5640  | 965.9705  |
| Frequencies -- | 969.4941  | 971.5034  | 986.9936  |
| Frequencies -- | 993.5320  | 995.2342  | 1003.2904 |
| Frequencies -- | 1021.5205 | 1038.8321 | 1042.3034 |
| Frequencies -- | 1043.9070 | 1047.3733 | 1049.0339 |
| Frequencies -- | 1050.4194 | 1052.1749 | 1053.0375 |
| Frequencies -- | 1086.4882 | 1087.9673 | 1089.7552 |
| Frequencies -- | 1110.5317 | 1123.8524 | 1172.6274 |
| Frequencies -- | 1174.2931 | 1177.5121 | 1180.8848 |
| Frequencies -- | 1181.8080 | 1190.2236 | 1193.2863 |
| Frequencies -- | 1202.5861 | 1208.5743 | 1221.2229 |
| Frequencies -- | 1240.0141 | 1287.8962 | 1290.5585 |
| Frequencies -- | 1322.0175 | 1351.4278 | 1354.6574 |
| Frequencies -- | 1375.1332 | 1380.5442 | 1395.9759 |
| Frequencies -- | 1409.5747 | 1412.9746 | 1422.2860 |
| Frequencies -- | 1424.7540 | 1426.2835 | 1429.9782 |
| Frequencies -- | 1432.5277 | 1439.2770 | 1445.6432 |
| Frequencies -- | 1448.7974 | 1450.6458 | 1454.7712 |
| Frequencies -- | 1455.2199 | 1458.7260 | 1463.4178 |
| Frequencies -- | 1480.1229 | 1485.2320 | 1490.9685 |
| Frequencies -- | 1492.0214 | 1496.2928 | 1499.1477 |
| Frequencies -- | 1499.6277 | 1502.5714 | 1507.3722 |
| Frequencies -- | 1509.1453 | 1512.7378 | 1514.4203 |
| Frequencies -- | 1516.3290 | 1586.8083 | 1589.1188 |
| Frequencies -- | 1600.4869 | 1604.5034 | 1614.6045 |
| Frequencies -- | 1627.0137 | 2982.3079 | 3005.4806 |
| Frequencies -- | 3005.6698 | 3006.4652 | 3007.9986 |
| Frequencies -- | 3009.2463 | 3019.5434 | 3096.7287 |
| Frequencies -- | 3099.9274 | 3100.2459 | 3101.3155 |
| Frequencies -- | 3105.0060 | 3105.3583 | 3136.4620 |
| Frequencies -- | 3141.9023 | 3142.9132 | 3144.5029 |
| Frequencies -- | 3147.0742 | 3148.2367 | 3151.2422 |
| Frequencies -- | 3151.3480 | 3153.5854 | 3160.7027 |
| Frequencies -- | 3164.9951 | 3175.3002 | 3175.7253 |
| Frequencies -- | 3190.4285 | 3193.0871 | 3223.9993 |

**proximal conformation**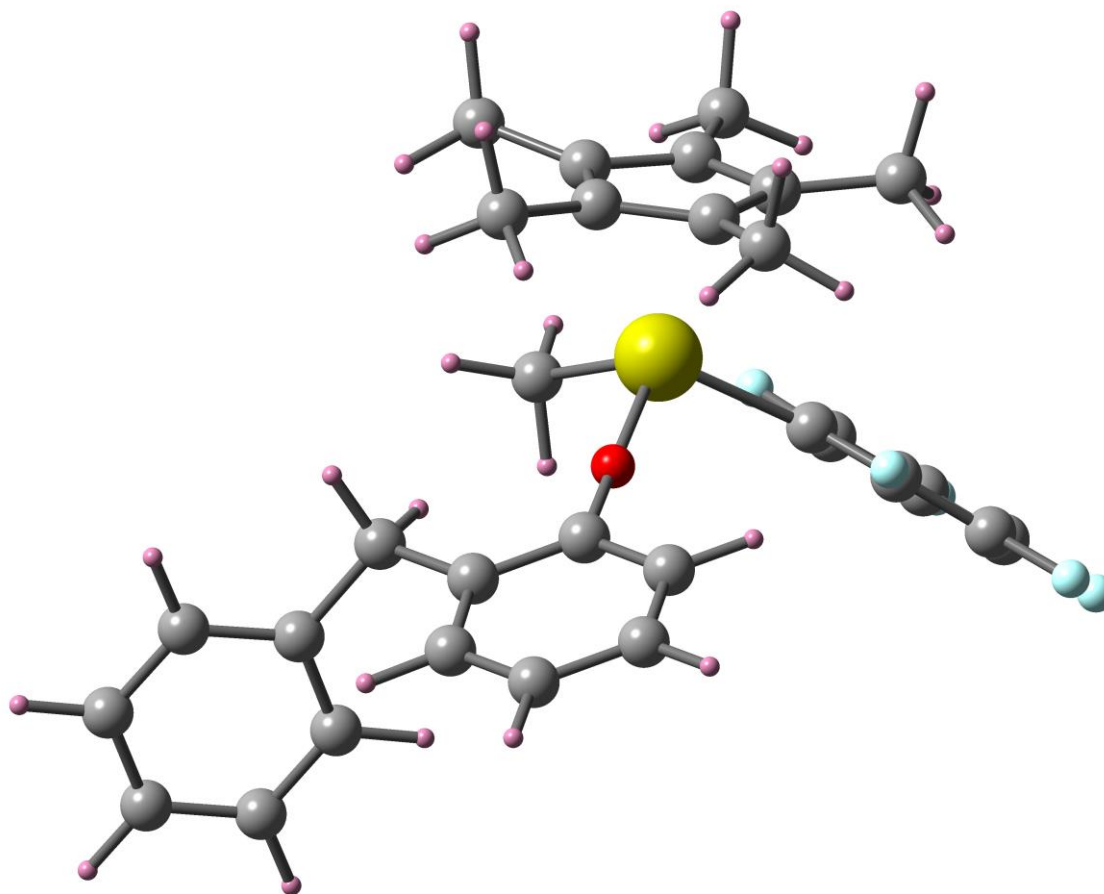

| <b>vacuum</b> | <b>toluene-like solvent</b> | <b>D3 dispersion</b> |
|---------------|-----------------------------|----------------------|
| -1792.6418717 | -1792.6491262               | -0.43065036          |

|    |             |             |             |
|----|-------------|-------------|-------------|
| Ti | 0.59406300  | 0.90415400  | -0.26314600 |
| C  | -0.26100600 | 0.88425500  | -2.17032000 |
| H  | -0.49044500 | -0.19015000 | -2.30847400 |
| H  | -1.19432200 | 1.46046900  | -2.25534200 |
| H  | 0.44119600  | 1.20652100  | -2.95117400 |
| O  | -0.75081300 | 0.12378200  | 0.63717700  |
| C  | -1.72273300 | -0.32752100 | 1.52169100  |
| C  | -1.30454500 | -0.84429600 | 2.77533500  |
| C  | -3.10582900 | -0.29263800 | 1.16887800  |
| C  | -2.25339300 | -1.31041200 | 3.70294400  |
| C  | -4.03570100 | -0.76570000 | 2.12777200  |
| C  | -3.62802800 | -1.26579500 | 3.38067000  |
| H  | -1.91981400 | -1.70930400 | 4.66348000  |
| H  | -5.09754700 | -0.75246500 | 1.87663600  |
| C  | 2.45594900  | 2.34102900  | 0.51032100  |
| C  | 2.12094100  | 2.82405100  | -0.80943400 |
| C  | 1.29693000  | 2.52069600  | 1.35972600  |
| C  | 0.76236300  | 3.30634700  | -0.78188200 |
| C  | 0.24651600  | 3.10959500  | 0.55925500  |
| C  | 2.12815800  | -0.67507100 | -0.31485700 |

|   |             |             |             |
|---|-------------|-------------|-------------|
| C | 2.73148900  | -1.13116700 | -1.50112000 |
| C | 2.50608200  | -1.39800800 | 0.82879100  |
| C | 3.61664000  | -2.22626000 | -1.57284300 |
| F | 2.47128600  | -0.47304000 | -2.72044300 |
| C | 3.38115400  | -2.50061200 | 0.82875800  |
| F | 2.01183900  | -1.00444200 | 2.09296400  |
| C | 3.94039800  | -2.92164500 | -0.39280300 |
| F | 4.17800100  | -2.62686100 | -2.78268500 |
| F | 3.70958200  | -3.17024900 | 2.00520500  |
| F | 4.81074100  | -4.00246900 | -0.43081900 |
| C | -3.58129800 | 0.27156000  | -0.17387700 |
| H | -3.90314000 | 1.31632000  | -0.01865700 |
| H | -2.72436000 | 0.31182800  | -0.85564600 |
| C | 3.83552600  | 1.93386300  | 0.97601500  |
| H | 4.41250500  | 2.83281300  | 1.25654700  |
| H | 3.80142600  | 1.28094500  | 1.85682000  |
| H | 4.40494700  | 1.41385400  | 0.19445300  |
| C | 3.06661100  | 2.91578900  | -1.98533100 |
| H | 3.56610500  | 3.90106400  | -1.99430400 |
| H | 3.85407800  | 2.15214000  | -1.94668000 |
| H | 2.54814600  | 2.80638900  | -2.94749100 |
| C | 1.25262200  | 2.29559700  | 2.85445000  |
| H | 1.88417300  | 1.45526800  | 3.16833600  |
| H | 1.61756600  | 3.19619900  | 3.37929700  |
| H | 0.23532400  | 2.09905600  | 3.21691700  |
| C | 0.07689900  | 4.08052100  | -1.88338000 |
| H | 0.34236700  | 5.14977300  | -1.80736900 |
| H | 0.37708000  | 3.74139100  | -2.88355200 |
| H | -1.01754200 | 4.01277500  | -1.82321800 |
| C | -1.09391100 | 3.59503300  | 1.06538200  |
| H | -1.41687400 | 3.05762400  | 1.96628100  |
| H | -1.03426000 | 4.66654400  | 1.32593000  |
| H | -1.88736000 | 3.48920300  | 0.31224900  |
| H | -4.37327000 | -1.62520100 | 4.09321900  |
| H | -0.24163900 | -0.88324700 | 3.00009500  |
| C | -4.72061600 | -0.49336000 | -0.85281600 |
| C | -5.97151200 | 0.12523900  | -1.09611300 |
| C | -4.53752700 | -1.82907900 | -1.29598000 |
| C | -7.01159700 | -0.56502100 | -1.75897700 |
| H | -6.13628400 | 1.15495100  | -0.76735200 |
| C | -5.57103100 | -2.52321200 | -1.95787800 |
| H | -3.58225900 | -2.32943500 | -1.11821800 |
| C | -6.81480300 | -1.89321500 | -2.19300900 |
| H | -7.96787800 | -0.06647100 | -1.93574700 |
| H | -5.40671600 | -3.55055700 | -2.29217700 |
| H | -7.61563100 | -2.42978500 | -2.70726300 |

|                |          |          |          |
|----------------|----------|----------|----------|
| Frequencies -- | 8.1929   | 15.8958  | 20.4854  |
| Frequencies -- | 23.6460  | 26.4407  | 34.2596  |
| Frequencies -- | 44.9760  | 50.0615  | 68.9313  |
| Frequencies -- | 78.9029  | 89.1512  | 99.0806  |
| Frequencies -- | 103.9856 | 113.0493 | 118.8080 |
| Frequencies -- | 123.3795 | 126.0357 | 126.6093 |
| Frequencies -- | 141.1452 | 151.2067 | 155.4273 |
| Frequencies -- | 158.6365 | 163.0705 | 169.2210 |
| Frequencies -- | 172.9452 | 186.6769 | 200.4473 |
| Frequencies -- | 205.6739 | 215.6707 | 217.2194 |
| Frequencies -- | 237.8963 | 248.6652 | 262.1941 |

|                |           |           |           |
|----------------|-----------|-----------|-----------|
| Frequencies -- | 264.6249  | 268.6761  | 287.0577  |
| Frequencies -- | 290.7488  | 296.3729  | 296.5944  |
| Frequencies -- | 304.3799  | 309.8688  | 316.2663  |
| Frequencies -- | 325.4567  | 340.9451  | 348.8011  |
| Frequencies -- | 383.9384  | 386.0509  | 392.8792  |
| Frequencies -- | 406.6941  | 411.5217  | 428.2811  |
| Frequencies -- | 451.5170  | 460.8008  | 468.3316  |
| Frequencies -- | 481.1261  | 505.8862  | 535.3115  |
| Frequencies -- | 538.2757  | 539.8331  | 543.4080  |
| Frequencies -- | 554.4629  | 560.3453  | 573.0012  |
| Frequencies -- | 583.9503  | 594.4815  | 606.4049  |
| Frequencies -- | 617.0374  | 618.5670  | 623.8420  |
| Frequencies -- | 632.3878  | 644.1578  | 680.5998  |
| Frequencies -- | 687.7687  | 708.8384  | 721.3869  |
| Frequencies -- | 724.6439  | 727.6285  | 745.7958  |
| Frequencies -- | 770.7923  | 802.5166  | 803.4494  |
| Frequencies -- | 812.2318  | 826.8069  | 862.7074  |
| Frequencies -- | 878.5386  | 884.9354  | 923.1702  |
| Frequencies -- | 930.7245  | 950.4606  | 968.7171  |
| Frequencies -- | 969.9809  | 970.8296  | 988.5643  |
| Frequencies -- | 994.4165  | 995.0154  | 1004.5968 |
| Frequencies -- | 1021.6202 | 1037.6193 | 1044.4795 |
| Frequencies -- | 1045.0737 | 1048.9681 | 1049.8712 |
| Frequencies -- | 1050.8659 | 1051.9452 | 1052.3600 |
| Frequencies -- | 1086.4037 | 1088.2943 | 1090.1532 |
| Frequencies -- | 1110.8314 | 1123.6854 | 1171.6016 |
| Frequencies -- | 1173.9060 | 1177.2316 | 1180.9429 |
| Frequencies -- | 1182.1199 | 1189.7799 | 1192.9906 |
| Frequencies -- | 1202.8420 | 1209.1522 | 1221.7930 |
| Frequencies -- | 1243.2210 | 1286.2732 | 1292.7443 |
| Frequencies -- | 1318.5748 | 1352.7962 | 1353.1945 |
| Frequencies -- | 1375.3616 | 1379.5224 | 1394.8975 |
| Frequencies -- | 1410.4239 | 1413.1133 | 1423.4031 |
| Frequencies -- | 1424.2613 | 1427.4727 | 1429.8229 |
| Frequencies -- | 1432.0392 | 1432.6461 | 1441.0889 |
| Frequencies -- | 1446.9049 | 1450.8897 | 1454.7274 |
| Frequencies -- | 1455.3521 | 1459.2907 | 1463.5988 |
| Frequencies -- | 1481.4857 | 1485.7199 | 1491.1908 |
| Frequencies -- | 1491.5124 | 1495.1465 | 1498.5082 |
| Frequencies -- | 1499.7928 | 1502.6267 | 1506.1036 |
| Frequencies -- | 1508.0915 | 1511.0034 | 1514.4594 |
| Frequencies -- | 1518.6695 | 1587.4380 | 1588.3396 |
| Frequencies -- | 1600.6446 | 1604.5120 | 1614.6757 |
| Frequencies -- | 1626.7528 | 2977.4785 | 3004.6666 |
| Frequencies -- | 3005.2858 | 3007.4001 | 3008.2933 |
| Frequencies -- | 3009.8481 | 3019.6142 | 3095.2238 |
| Frequencies -- | 3097.6335 | 3098.8591 | 3102.3924 |
| Frequencies -- | 3103.5059 | 3105.2000 | 3133.1614 |
| Frequencies -- | 3137.0592 | 3140.5047 | 3142.3418 |
| Frequencies -- | 3146.3855 | 3147.4264 | 3148.8413 |
| Frequencies -- | 3151.3481 | 3152.7321 | 3161.4819 |
| Frequencies -- | 3163.7317 | 3173.4203 | 3175.2520 |
| Frequencies -- | 3190.3914 | 3192.6708 | 3236.6285 |

**Catalyst 16:**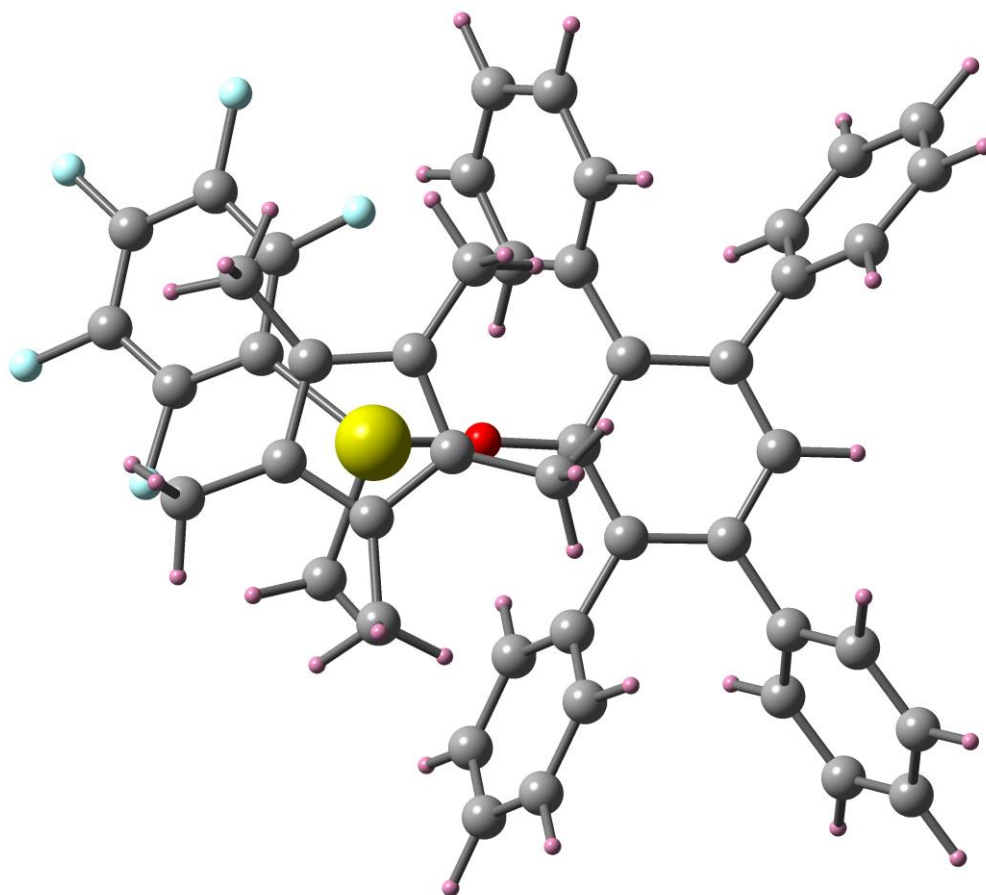

| <b>vacuum</b> | <b>toluene-like solvent</b> | <b>D3 dispersion</b> |
|---------------|-----------------------------|----------------------|
| -2446.1612696 | -2446.1719709               | -0.66977625          |

|    |             |             |             |
|----|-------------|-------------|-------------|
| Ti | -1.50925200 | -1.22596900 | 0.49873000  |
| C  | -1.37110700 | -2.96755700 | -0.61473800 |
| H  | -1.35404800 | -2.57508300 | -1.64646700 |
| H  | -0.44362800 | -3.52086400 | -0.43327000 |
| H  | -2.23787900 | -3.62756900 | -0.48848200 |
| O  | -0.01845900 | -0.38377000 | -0.15298500 |
| C  | 1.27445100  | 0.12461400  | -0.25930000 |
| C  | 1.49115400  | 1.53825700  | -0.11341600 |
| C  | 2.36928500  | -0.78159500 | -0.47674900 |
| C  | 2.83356000  | 2.00057100  | 0.05172200  |
| C  | 3.69876900  | -0.29169400 | -0.30105800 |
| C  | 3.89432300  | 1.06845500  | 0.02205300  |
| C  | -2.94720300 | -1.16065300 | 2.55455600  |
| C  | -2.77047700 | -2.55807800 | 2.23674700  |
| C  | -1.64428100 | -0.60013700 | 2.83618900  |
| C  | -1.36730500 | -2.87159500 | 2.33460600  |
| C  | -0.66537600 | -1.65411700 | 2.69025800  |
| C  | -3.30205000 | -0.31665100 | -0.44779800 |
| C  | -4.17938900 | -0.93553900 | -1.36088700 |
| C  | -3.60261300 | 1.03660600  | -0.21156400 |

|   |             |             |             |
|---|-------------|-------------|-------------|
| C | -5.23836900 | -0.27287900 | -2.01787900 |
| F | -4.05620500 | -2.30384300 | -1.66792800 |
| C | -4.64557600 | 1.75349000  | -0.82612400 |
| F | -2.83414600 | 1.74358600  | 0.73053800  |
| C | -5.46965900 | 1.08834200  | -1.75236200 |
| F | -6.06246100 | -0.94569800 | -2.91854600 |
| F | -4.88546000 | 3.09505900  | -0.53261000 |
| F | -6.50606000 | 1.76360300  | -2.38500600 |
| C | -4.28417100 | -0.49460700 | 2.78757900  |
| H | -4.65157400 | -0.75290200 | 3.79686100  |
| H | -4.22459400 | 0.59811100  | 2.73195300  |
| H | -5.04710900 | -0.82874500 | 2.07158700  |
| C | -3.89355100 | -3.53233200 | 1.96474200  |
| H | -4.41860700 | -3.77987900 | 2.90413800  |
| H | -4.64347500 | -3.12032300 | 1.27435100  |
| H | -3.53050000 | -4.47489600 | 1.53648400  |
| C | -1.35401300 | 0.77579300  | 3.39100400  |
| H | -0.50144800 | 1.25715900  | 2.89562500  |
| H | -2.21014800 | 1.45108000  | 3.28724400  |
| H | -1.11252500 | 0.70002600  | 4.46587400  |
| C | -0.76153400 | -4.25503600 | 2.29204000  |
| H | -0.81462900 | -4.71285100 | 3.29582300  |
| H | -1.28915100 | -4.92320500 | 1.59953400  |
| H | 0.29407400  | -4.23692200 | 1.99445400  |
| C | 0.79068800  | -1.54699900 | 3.08420000  |
| H | 1.19261400  | -0.54059000 | 2.90902200  |
| H | 0.90353900  | -1.76283100 | 4.16177300  |
| H | 1.42503400  | -2.25803900 | 2.54176600  |
| H | 4.91340200  | 1.43477500  | 0.13781700  |
| C | 3.22375700  | 3.44979000  | 0.20330800  |
| C | 3.02485800  | 4.38990600  | -0.84048000 |
| C | 3.89788500  | 3.88269500  | 1.37495100  |
| C | 3.47665500  | 5.71986700  | -0.71323500 |
| H | 2.52083600  | 4.07987100  | -1.75648600 |
| C | 4.34483900  | 5.21486900  | 1.50893200  |
| H | 4.06598100  | 3.17448900  | 2.18962700  |
| C | 4.13607100  | 6.14054700  | 0.46327000  |
| H | 3.31483900  | 6.42505700  | -1.53209900 |
| H | 4.85427300  | 5.52627700  | 2.42421900  |
| H | 4.48347600  | 7.17172400  | 0.56193700  |
| C | 4.94062400  | -1.12846600 | -0.48532900 |
| C | 5.32211500  | -1.62971500 | -1.75652800 |
| C | 5.80973200  | -1.35683100 | 0.61309700  |
| C | 6.52775900  | -2.34313600 | -1.92182200 |
| H | 4.67906000  | -1.45578500 | -2.62006600 |
| C | 7.01338800  | -2.07689700 | 0.45312600  |
| H | 5.53820500  | -0.97440500 | 1.59979700  |
| C | 7.37782800  | -2.57397000 | -0.81734900 |
| H | 6.80284700  | -2.71565000 | -2.91159100 |
| H | 7.66256000  | -2.24599600 | 1.31578500  |
| H | 8.31015700  | -3.12891900 | -0.94590200 |
| C | 0.37307800  | 2.53719000  | -0.22873000 |
| C | -0.33927400 | 2.64510900  | -1.45260300 |
| C | 0.10091900  | 3.48609100  | 0.78836100  |
| C | -1.27092300 | 3.68224100  | -1.66100100 |
| H | -0.14221300 | 1.92955700  | -2.25362500 |
| C | -0.83737500 | 4.51822400  | 0.58726200  |



|   |             |             |             |
|---|-------------|-------------|-------------|
| H | 0.63885600  | 3.42955500  | 1.73579200  |
| C | -1.52093600 | 4.62765700  | -0.64235200 |
| H | -1.79821200 | 3.75380600  | -2.61544200 |
| H | -1.02878800 | 5.23834100  | 1.38626600  |
| H | -2.24463400 | 5.42997900  | -0.80157300 |
| C | 2.16517900  | -2.18968000 | -0.96825000 |
| C | 1.66306900  | -2.40154500 | -2.27924400 |
| C | 2.59169300  | -3.32018800 | -0.22681900 |
| C | 1.59878300  | -3.69649500 | -2.83331600 |
| H | 1.33901900  | -1.54549800 | -2.87421400 |
| C | 2.52002200  | -4.61873600 | -0.77294700 |
| H | 3.00621600  | -3.18296400 | 0.77276200  |
| C | 2.02809400  | -4.81284100 | -2.08210200 |
| H | 1.21534300  | -3.83311300 | -3.84715900 |
| H | 2.86088100  | -5.47331000 | -0.18343400 |
| H | 1.98175200  | -5.81642300 | -2.51101800 |

|                |          |          |          |
|----------------|----------|----------|----------|
| Frequencies -- | 13.2686  | 15.4961  | 18.3307  |
| Frequencies -- | 22.4255  | 27.6766  | 35.6528  |
| Frequencies -- | 36.9903  | 41.7775  | 42.9055  |
| Frequencies -- | 52.4478  | 53.5805  | 60.3637  |
| Frequencies -- | 64.5014  | 65.4613  | 71.0492  |
| Frequencies -- | 75.8018  | 85.4683  | 88.3179  |
| Frequencies -- | 91.1318  | 99.6232  | 104.9233 |
| Frequencies -- | 112.4049 | 118.0266 | 123.8326 |
| Frequencies -- | 125.7103 | 132.8223 | 137.9883 |
| Frequencies -- | 144.7598 | 146.7101 | 156.4106 |
| Frequencies -- | 158.9901 | 169.3455 | 178.3082 |
| Frequencies -- | 183.1533 | 191.2290 | 197.1232 |
| Frequencies -- | 207.8882 | 212.9424 | 215.0347 |
| Frequencies -- | 217.7897 | 230.1550 | 240.9675 |
| Frequencies -- | 253.5500 | 258.4634 | 259.9321 |
| Frequencies -- | 264.8373 | 270.8184 | 283.2308 |
| Frequencies -- | 286.9962 | 288.0884 | 299.0446 |
| Frequencies -- | 299.5056 | 301.3720 | 307.3533 |
| Frequencies -- | 320.9824 | 328.0225 | 340.6907 |
| Frequencies -- | 345.2848 | 370.0006 | 383.0411 |
| Frequencies -- | 383.2353 | 394.9610 | 401.4179 |
| Frequencies -- | 403.7960 | 406.0970 | 406.4077 |
| Frequencies -- | 411.0233 | 413.5322 | 429.8216 |
| Frequencies -- | 443.8483 | 460.7456 | 493.1313 |
| Frequencies -- | 512.6999 | 518.5954 | 528.7584 |
| Frequencies -- | 534.0492 | 538.6457 | 540.2488 |
| Frequencies -- | 545.4884 | 548.9007 | 556.5914 |
| Frequencies -- | 567.0177 | 587.0141 | 594.6084 |
| Frequencies -- | 603.0194 | 614.8997 | 615.2644 |
| Frequencies -- | 615.6667 | 617.7866 | 620.4722 |
| Frequencies -- | 623.5483 | 633.4973 | 634.7745 |
| Frequencies -- | 642.0793 | 653.5439 | 672.1841 |
| Frequencies -- | 687.4376 | 688.4093 | 694.0393 |
| Frequencies -- | 709.7403 | 710.4710 | 710.9453 |
| Frequencies -- | 713.1760 | 718.2069 | 721.2538 |
| Frequencies -- | 729.3489 | 746.1253 | 762.8925 |
| Frequencies -- | 770.5241 | 783.0015 | 793.9072 |
| Frequencies -- | 801.6614 | 803.7117 | 809.2052 |
| Frequencies -- | 856.8459 | 859.0031 | 860.8997 |
| Frequencies -- | 860.9482 | 864.6789 | 888.5050 |
| Frequencies -- | 908.8661 | 931.3222 | 933.8760 |
| Frequencies -- | 937.4150 | 939.6600 | 950.6339 |
| Frequencies -- | 968.9486 | 973.8980 | 985.5227 |
| Frequencies -- | 986.0755 | 989.6648 | 991.8359 |

|                |           |           |           |
|----------------|-----------|-----------|-----------|
| Frequencies -- | 995.1963  | 996.5880  | 1002.6545 |
| Frequencies -- | 1003.2741 | 1006.3380 | 1006.5178 |
| Frequencies -- | 1013.8179 | 1020.1162 | 1022.4443 |
| Frequencies -- | 1040.3385 | 1040.6737 | 1043.6390 |
| Frequencies -- | 1046.5653 | 1047.9273 | 1049.2056 |
| Frequencies -- | 1050.3262 | 1052.6248 | 1053.2123 |
| Frequencies -- | 1053.6071 | 1054.0874 | 1088.0694 |
| Frequencies -- | 1088.2954 | 1088.9502 | 1089.7141 |
| Frequencies -- | 1090.1628 | 1090.9104 | 1122.0899 |
| Frequencies -- | 1124.9987 | 1126.9185 | 1174.9539 |
| Frequencies -- | 1177.8247 | 1181.7478 | 1181.7623 |
| Frequencies -- | 1182.8711 | 1183.0310 | 1183.9862 |
| Frequencies -- | 1188.0191 | 1203.3864 | 1204.6267 |
| Frequencies -- | 1205.7091 | 1206.4444 | 1225.5919 |
| Frequencies -- | 1262.7342 | 1279.0183 | 1288.9731 |
| Frequencies -- | 1298.0905 | 1315.4374 | 1325.1781 |
| Frequencies -- | 1330.1564 | 1332.3340 | 1333.9004 |
| Frequencies -- | 1349.5292 | 1364.6565 | 1368.0624 |
| Frequencies -- | 1370.0710 | 1370.9201 | 1378.6209 |
| Frequencies -- | 1392.8260 | 1411.8477 | 1414.4930 |
| Frequencies -- | 1422.9144 | 1425.5882 | 1428.4298 |
| Frequencies -- | 1431.6755 | 1433.5305 | 1435.8332 |
| Frequencies -- | 1437.3323 | 1441.9985 | 1443.2207 |
| Frequencies -- | 1445.3847 | 1447.3513 | 1452.2324 |
| Frequencies -- | 1452.9384 | 1454.8733 | 1460.5761 |
| Frequencies -- | 1464.4057 | 1481.6820 | 1492.8007 |
| Frequencies -- | 1493.3942 | 1496.3247 | 1496.3675 |
| Frequencies -- | 1498.5492 | 1501.1800 | 1501.7884 |
| Frequencies -- | 1504.6730 | 1506.4920 | 1506.6505 |
| Frequencies -- | 1512.8668 | 1515.8273 | 1520.4088 |
| Frequencies -- | 1525.3614 | 1584.4794 | 1588.1025 |
| Frequencies -- | 1593.9350 | 1595.6242 | 1596.6260 |
| Frequencies -- | 1597.9022 | 1600.9916 | 1622.8667 |
| Frequencies -- | 1623.2755 | 1623.7356 | 1624.8784 |
| Frequencies -- | 3005.1893 | 3005.8491 | 3006.5476 |
| Frequencies -- | 3007.3837 | 3008.9650 | 3010.1254 |
| Frequencies -- | 3095.0131 | 3101.3064 | 3104.8622 |
| Frequencies -- | 3106.4653 | 3109.9283 | 3134.5651 |
| Frequencies -- | 3141.8717 | 3149.7311 | 3149.8964 |
| Frequencies -- | 3150.5886 | 3152.2001 | 3153.1540 |
| Frequencies -- | 3153.8538 | 3155.6754 | 3157.3912 |
| Frequencies -- | 3157.9432 | 3158.4298 | 3160.2244 |
| Frequencies -- | 3162.5762 | 3170.2507 | 3170.6908 |
| Frequencies -- | 3173.1181 | 3174.5093 | 3179.9232 |
| Frequencies -- | 3181.2459 | 3183.5249 | 3183.7376 |
| Frequencies -- | 3184.2557 | 3192.1273 | 3194.4100 |
| Frequencies -- | 3195.0990 | 3195.7715 | 3196.0448 |

**Catalyst 17:****distal conformation**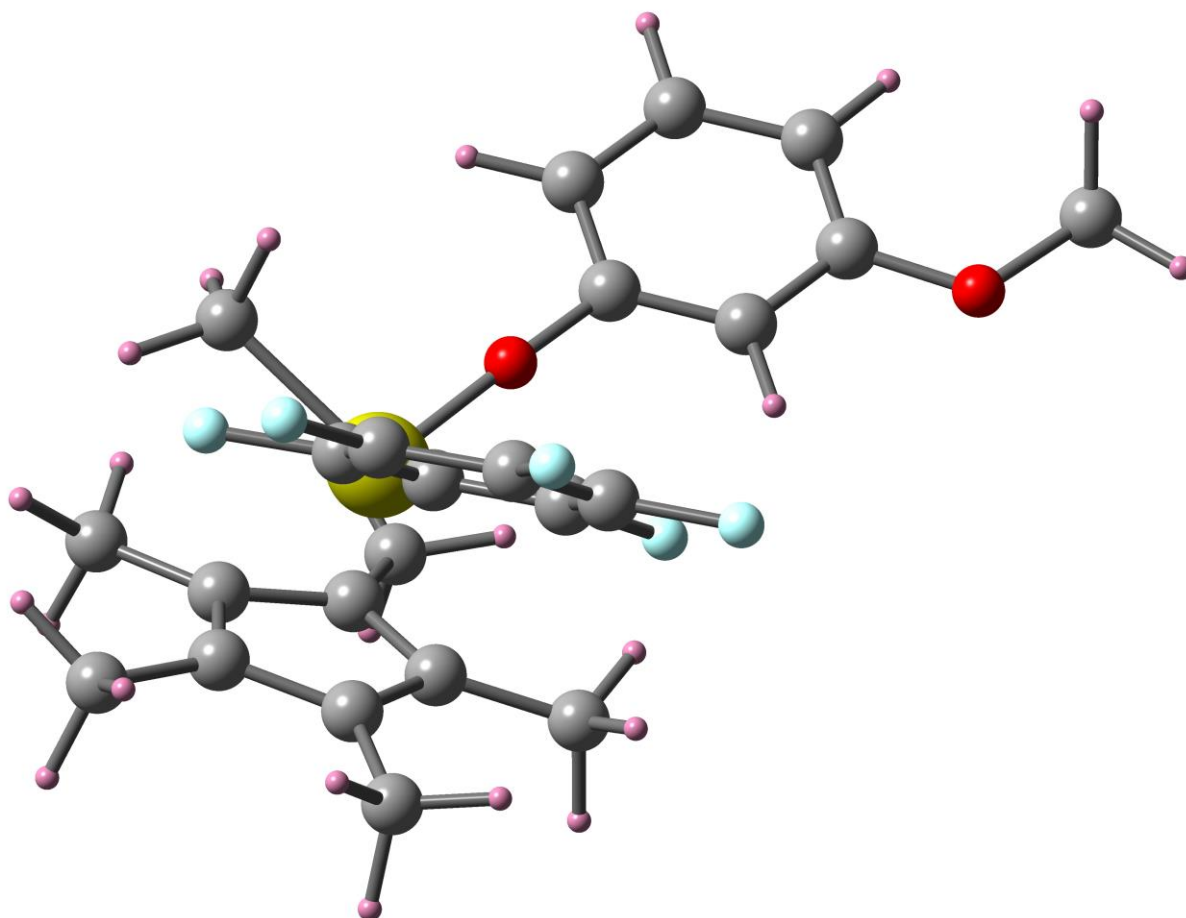

| <b>vacuum</b> | <b>toluene-like solvent</b> | <b>D3 dispersion</b> |
|---------------|-----------------------------|----------------------|
| -1636.8811814 | -1636.8874127               | -0.35445826          |

|    |             |             |             |
|----|-------------|-------------|-------------|
| Ti | -0.33924300 | -1.08322900 | -0.40894300 |
| C  | -0.65565200 | -1.78407800 | -2.35263100 |
| H  | -0.54142400 | -0.85384100 | -2.94301900 |
| H  | 0.10504200  | -2.50690900 | -2.68682000 |
| H  | -1.65994500 | -2.19934300 | -2.51629500 |
| O  | 1.29973200  | -0.42407900 | -0.68490200 |
| C  | 2.62359300  | -0.06209000 | -0.83636800 |
| C  | 3.19658000  | 0.88343300  | 0.03913400  |
| C  | 3.38470500  | -0.63091400 | -1.89276800 |
| C  | 4.54886500  | 1.26303000  | -0.13492800 |
| C  | 4.72577400  | -0.23889800 | -2.05029900 |
| C  | 5.32325200  | 0.70299000  | -1.18191800 |
| H  | 5.31911500  | -0.66797500 | -2.86106100 |
| C  | -1.49636100 | -1.77491000 | 1.65881100  |
| C  | -1.95831800 | -2.68864000 | 0.63927400  |
| C  | -0.06557700 | -1.95059300 | 1.80091500  |
| C  | -0.82222600 | -3.42981500 | 0.14910800  |

|   |             |             |             |
|---|-------------|-------------|-------------|
| C | 0.35302900  | -2.96828300 | 0.86292500  |
| C | -1.52763300 | 0.74976200  | -0.21687400 |
| C | -2.70913100 | 0.97551400  | -0.94379000 |
| C | -1.09948000 | 1.85208600  | 0.54182100  |
| C | -3.41403300 | 2.19582200  | -0.95525300 |
| F | -3.26090800 | -0.06680700 | -1.71882800 |
| C | -1.75436900 | 3.09819800  | 0.57463800  |
| F | 0.05031500  | 1.73421300  | 1.35246400  |
| C | -2.92549900 | 3.27059000  | -0.18842400 |
| F | -4.57915900 | 2.35588100  | -1.70144400 |
| F | -1.27483900 | 4.15324500  | 1.34715700  |
| F | -3.59635900 | 4.48629500  | -0.17690200 |
| C | -2.37733000 | -0.94288000 | 2.56310800  |
| H | -2.70894700 | -1.55042900 | 3.42376600  |
| H | -1.85150000 | -0.06803800 | 2.96602300  |
| H | -3.28003700 | -0.58529100 | 2.05048300  |
| C | -3.39770700 | -2.91061200 | 0.23397700  |
| H | -3.86252900 | -3.67148300 | 0.88621100  |
| H | -4.00049200 | -1.99709200 | 0.31660000  |
| H | -3.48647300 | -3.27126100 | -0.79961800 |
| C | 0.80480000  | -1.29871900 | 2.85173000  |
| H | 0.47490400  | -0.28035800 | 3.09234000  |
| H | 0.76932100  | -1.88721300 | 3.78563300  |
| H | 1.85718500  | -1.24049400 | 2.54448200  |
| C | -0.87527700 | -4.62170800 | -0.77785100 |
| H | -1.09710400 | -5.53516900 | -0.19833800 |
| H | -1.65655600 | -4.52409000 | -1.54315000 |
| H | 0.07866400  | -4.78880300 | -1.29582600 |
| C | 1.74046600  | -3.55967000 | 0.74773200  |
| H | 2.51926900  | -2.85678200 | 1.07023800  |
| H | 1.82405100  | -4.45840400 | 1.38401700  |
| H | 1.97863400  | -3.86667300 | -0.28043500 |
| H | 6.36356600  | 0.98489100  | -1.33197200 |
| H | 2.60790000  | 1.33549800  | 0.83326600  |
| H | 2.92183000  | -1.35136900 | -2.56583100 |
| O | 5.01279400  | 2.20554700  | 0.79427800  |
| C | 6.38795100  | 2.69599400  | 0.67774100  |
| H | 6.49899600  | 3.41837800  | 1.49563700  |
| H | 7.12054500  | 1.88024500  | 0.80271000  |
| H | 6.55513500  | 3.20219000  | -0.28819400 |

|                |          |          |          |
|----------------|----------|----------|----------|
| Frequencies -- | 12.6890  | 18.7643  | 20.8901  |
| Frequencies -- | 30.1269  | 40.7202  | 43.1906  |
| Frequencies -- | 75.0963  | 78.8870  | 99.0055  |
| Frequencies -- | 100.5326 | 104.5864 | 109.6778 |
| Frequencies -- | 114.4332 | 120.6688 | 124.7126 |
| Frequencies -- | 127.7250 | 132.1224 | 142.2709 |
| Frequencies -- | 151.0200 | 157.5701 | 162.1958 |
| Frequencies -- | 168.9724 | 176.9650 | 189.9526 |
| Frequencies -- | 197.1601 | 204.2814 | 207.8853 |
| Frequencies -- | 226.0491 | 235.9415 | 248.4906 |
| Frequencies -- | 260.5512 | 265.1901 | 266.9366 |
| Frequencies -- | 286.6183 | 291.0192 | 294.1138 |
| Frequencies -- | 298.8153 | 300.5514 | 308.4642 |
| Frequencies -- | 312.0693 | 329.6071 | 348.1663 |
| Frequencies -- | 380.4682 | 384.8269 | 389.0102 |
| Frequencies -- | 397.2860 | 416.8259 | 427.5596 |
| Frequencies -- | 456.3738 | 461.7501 | 474.8488 |

|                |           |           |           |
|----------------|-----------|-----------|-----------|
| Frequencies -- | 508.9217  | 536.5033  | 540.5060  |
| Frequencies -- | 543.0075  | 555.7891  | 558.5789  |
| Frequencies -- | 572.6822  | 582.6574  | 595.2644  |
| Frequencies -- | 604.9806  | 605.4252  | 613.5814  |
| Frequencies -- | 633.7465  | 642.1022  | 676.2436  |
| Frequencies -- | 681.2964  | 688.1916  | 723.3511  |
| Frequencies -- | 729.9285  | 761.0870  | 780.4237  |
| Frequencies -- | 803.1240  | 804.3372  | 851.0696  |
| Frequencies -- | 865.8060  | 884.6129  | 949.9162  |
| Frequencies -- | 958.4301  | 968.3109  | 969.9817  |
| Frequencies -- | 988.7159  | 994.7162  | 1027.1964 |
| Frequencies -- | 1038.0092 | 1044.4976 | 1045.4362 |
| Frequencies -- | 1049.4634 | 1049.8737 | 1051.4565 |
| Frequencies -- | 1086.6631 | 1087.8835 | 1097.6741 |
| Frequencies -- | 1124.0052 | 1126.2720 | 1165.7365 |
| Frequencies -- | 1171.7385 | 1173.5902 | 1174.7682 |
| Frequencies -- | 1177.1405 | 1189.9240 | 1200.5969 |
| Frequencies -- | 1278.8892 | 1289.4256 | 1302.9061 |
| Frequencies -- | 1354.7984 | 1385.3230 | 1396.4738 |
| Frequencies -- | 1411.7649 | 1412.8808 | 1423.8173 |
| Frequencies -- | 1424.3733 | 1426.9530 | 1430.0631 |
| Frequencies -- | 1431.5609 | 1432.4716 | 1438.9308 |
| Frequencies -- | 1446.0828 | 1450.8715 | 1453.8439 |
| Frequencies -- | 1457.3976 | 1457.9044 | 1462.5358 |
| Frequencies -- | 1479.9748 | 1483.7594 | 1485.2724 |
| Frequencies -- | 1489.9534 | 1490.4490 | 1491.4660 |
| Frequencies -- | 1497.4974 | 1499.4999 | 1505.3561 |
| Frequencies -- | 1506.7119 | 1510.6437 | 1513.1627 |
| Frequencies -- | 1516.6576 | 1589.0570 | 1589.8394 |
| Frequencies -- | 1600.0230 | 1618.6539 | 2974.1478 |
| Frequencies -- | 2991.7392 | 3004.6407 | 3005.2489 |
| Frequencies -- | 3007.0252 | 3007.9455 | 3009.0977 |
| Frequencies -- | 3089.0858 | 3093.0560 | 3095.4781 |
| Frequencies -- | 3099.1171 | 3100.7556 | 3102.0572 |
| Frequencies -- | 3103.6888 | 3136.3052 | 3139.2018 |
| Frequencies -- | 3141.2673 | 3144.0625 | 3146.9393 |
| Frequencies -- | 3149.5510 | 3155.5521 | 3166.8617 |
| Frequencies -- | 3207.4308 | 3217.0298 | 3239.2576 |

**proximal conformation**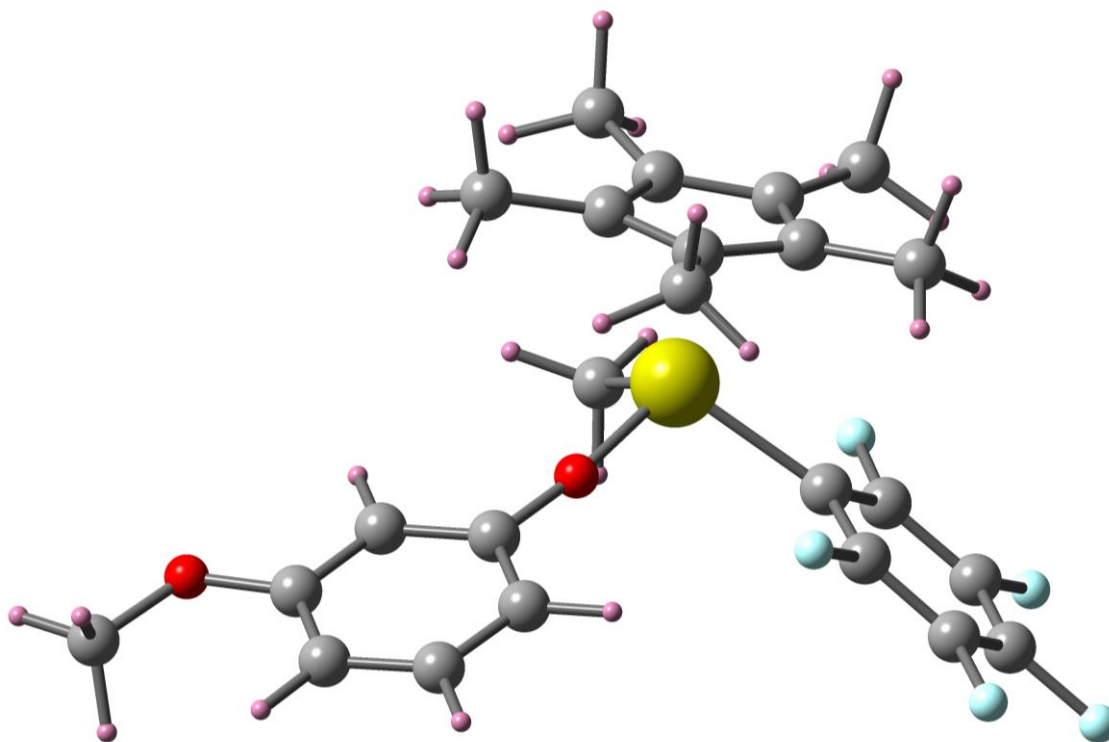

| <b>vacuum</b> | <b>toluene-like solvent</b> | <b>D3 dispersion</b> |
|---------------|-----------------------------|----------------------|
| -1636.8815736 | -1636.8879608               | -0.35457828          |

|    |             |             |             |
|----|-------------|-------------|-------------|
| Ti | 0.06728900  | 0.88586000  | -0.32010400 |
| C  | -0.20289700 | 1.36285400  | -2.33547900 |
| H  | -0.20022300 | 0.35871900  | -2.80271200 |
| H  | -1.17035500 | 1.84455200  | -2.54652700 |
| H  | 0.61305000  | 1.96582600  | -2.75833900 |
| O  | -1.34232100 | -0.20475400 | -0.17257900 |
| C  | -2.51303500 | -0.91352700 | 0.01181900  |
| C  | -2.55912300 | -1.97903000 | 0.94966200  |
| C  | -3.64660200 | -0.58207200 | -0.76077000 |
| C  | -3.76038800 | -2.69477900 | 1.09958200  |
| C  | -4.84583500 | -1.31392400 | -0.59391500 |
| C  | -4.91027900 | -2.37689400 | 0.34129800  |
| H  | -3.80569100 | -3.51834700 | 1.81588700  |
| C  | 1.25810200  | 2.08272500  | 1.48562500  |
| C  | 1.40965800  | 2.91234200  | 0.31256800  |
| C  | -0.15483400 | 1.98630400  | 1.78537900  |
| C  | 0.09832900  | 3.34009900  | -0.11128100 |
| C  | -0.87249600 | 2.76156900  | 0.79729100  |
| C  | 1.75249200  | -0.51617400 | -0.24975900 |
| C  | 2.78589100  | -0.52145300 | -1.20304000 |
| C  | 1.82005200  | -1.57167600 | 0.67487800  |
| C  | 3.80469000  | -1.49355200 | -1.26511900 |
| F  | 2.84493800  | 0.49852200  | -2.17545900 |
| C  | 2.80782900  | -2.57512700 | 0.66953300  |
| F  | 0.85748600  | -1.65692600 | 1.70565300  |

|   |             |             |             |
|---|-------------|-------------|-------------|
| C | 3.81175900  | -2.53421600 | -0.31719600 |
| F | 4.79972700  | -1.44244000 | -2.23818700 |
| F | 2.81576900  | -3.59491300 | 1.61874500  |
| F | 4.80230400  | -3.50660100 | -0.34994700 |
| C | 2.38034700  | 1.57632100  | 2.36291800  |
| H | 2.65081300  | 2.34986100  | 3.10337400  |
| H | 2.09753500  | 0.67590600  | 2.92259900  |
| H | 3.28764900  | 1.34426500  | 1.78982500  |
| C | 2.72158400  | 3.35499900  | -0.29407400 |
| H | 3.05303100  | 4.30208700  | 0.16799900  |
| H | 3.52068000  | 2.61893500  | -0.13793800 |
| H | 2.64333000  | 3.53018400  | -1.37542400 |
| C | -0.76015500 | 1.31529300  | 2.99803900  |
| H | -0.18069700 | 0.44026200  | 3.31978300  |
| H | -0.78961700 | 2.02197700  | 3.84619000  |
| H | -1.79010700 | 0.98032100  | 2.81653300  |
| C | -0.19129000 | 4.37966600  | -1.16848200 |
| H | -0.14195200 | 5.38885200  | -0.72293100 |
| H | 0.53475200  | 4.35123400  | -1.99158900 |
| H | -1.19215800 | 4.26492600  | -1.60521900 |
| C | -2.35855200 | 3.04432700  | 0.80078700  |
| H | -2.94264800 | 2.20210100  | 1.19431700  |
| H | -2.57539300 | 3.92003600  | 1.43790500  |
| H | -2.74158600 | 3.27283100  | -0.20338200 |
| H | -5.82226500 | -2.95324300 | 0.48430200  |
| H | -1.67235100 | -2.23073600 | 1.52675800  |
| H | -3.60800200 | 0.22515200  | -1.48953300 |
| O | -5.90563900 | -0.89381300 | -1.41238100 |
| C | -7.17998400 | -1.61252400 | -1.33959000 |
| H | -7.63093000 | -1.53577000 | -0.33542000 |
| H | -7.82676900 | -1.11392600 | -2.07194500 |
| H | -7.06037100 | -2.67445800 | -1.61381800 |

|                |          |          |          |
|----------------|----------|----------|----------|
| Frequencies -- | 7.8992   | 17.8557  | 27.2304  |
| Frequencies -- | 33.4459  | 39.9864  | 48.1866  |
| Frequencies -- | 76.9851  | 79.0337  | 81.6755  |
| Frequencies -- | 92.4829  | 96.8691  | 101.6571 |
| Frequencies -- | 111.7955 | 119.1146 | 123.1085 |
| Frequencies -- | 124.8592 | 130.3948 | 143.2862 |
| Frequencies -- | 149.0861 | 156.6316 | 157.4441 |
| Frequencies -- | 161.6341 | 168.9390 | 192.3307 |
| Frequencies -- | 193.8580 | 200.4974 | 209.5363 |
| Frequencies -- | 219.8979 | 234.7130 | 254.9794 |
| Frequencies -- | 260.3057 | 265.1564 | 268.4181 |
| Frequencies -- | 282.1904 | 290.7563 | 293.9714 |
| Frequencies -- | 294.8754 | 301.3484 | 307.4767 |
| Frequencies -- | 313.5099 | 324.6485 | 346.8174 |
| Frequencies -- | 378.1327 | 386.6543 | 392.0523 |
| Frequencies -- | 396.8558 | 415.0070 | 427.4695 |
| Frequencies -- | 456.1105 | 461.5391 | 475.7709 |
| Frequencies -- | 508.9894 | 536.6113 | 539.8512 |
| Frequencies -- | 543.0745 | 553.9287 | 560.2329 |
| Frequencies -- | 566.8534 | 582.9718 | 596.5265 |
| Frequencies -- | 605.5885 | 606.5720 | 615.6707 |
| Frequencies -- | 634.8640 | 641.8285 | 677.6194 |
| Frequencies -- | 682.3140 | 687.0855 | 723.7613 |
| Frequencies -- | 730.7322 | 764.2622 | 779.9702 |
| Frequencies -- | 801.8038 | 802.9799 | 840.5466 |
| Frequencies -- | 872.4080 | 884.3919 | 949.4258 |

|                |           |           |           |
|----------------|-----------|-----------|-----------|
| Frequencies -- | 964.5654  | 964.7103  | 971.8223  |
| Frequencies -- | 989.4603  | 994.7787  | 1025.4669 |
| Frequencies -- | 1037.3259 | 1043.3021 | 1044.9215 |
| Frequencies -- | 1047.9946 | 1050.3426 | 1051.2475 |
| Frequencies -- | 1085.7944 | 1087.2479 | 1101.9518 |
| Frequencies -- | 1122.8226 | 1126.5481 | 1163.3976 |
| Frequencies -- | 1170.7739 | 1172.9741 | 1175.1319 |
| Frequencies -- | 1177.3597 | 1189.8780 | 1201.9861 |
| Frequencies -- | 1278.1656 | 1289.4657 | 1302.2732 |
| Frequencies -- | 1353.4843 | 1384.9269 | 1394.9908 |
| Frequencies -- | 1409.6803 | 1411.8591 | 1422.6326 |
| Frequencies -- | 1423.1814 | 1426.8539 | 1429.1587 |
| Frequencies -- | 1431.1934 | 1431.6863 | 1436.9731 |
| Frequencies -- | 1447.0228 | 1450.8191 | 1453.5965 |
| Frequencies -- | 1457.0497 | 1457.9271 | 1462.2946 |
| Frequencies -- | 1479.0386 | 1482.5042 | 1485.5781 |
| Frequencies -- | 1489.8297 | 1491.0251 | 1491.3252 |
| Frequencies -- | 1497.1212 | 1497.6663 | 1504.4352 |
| Frequencies -- | 1506.3971 | 1510.5163 | 1513.6412 |
| Frequencies -- | 1514.1299 | 1588.1727 | 1590.9947 |
| Frequencies -- | 1599.6929 | 1618.9424 | 2974.8542 |
| Frequencies -- | 2992.0932 | 3004.0860 | 3004.4787 |
| Frequencies -- | 3006.3815 | 3007.8622 | 3008.9161 |
| Frequencies -- | 3089.7690 | 3093.8429 | 3095.4477 |
| Frequencies -- | 3099.0007 | 3100.9132 | 3101.2307 |
| Frequencies -- | 3102.9120 | 3135.4161 | 3138.7125 |
| Frequencies -- | 3141.2410 | 3142.8706 | 3145.7571 |
| Frequencies -- | 3148.7786 | 3154.6075 | 3169.1316 |
| Frequencies -- | 3212.4733 | 3219.2534 | 3233.0275 |



**Catalyst 18:**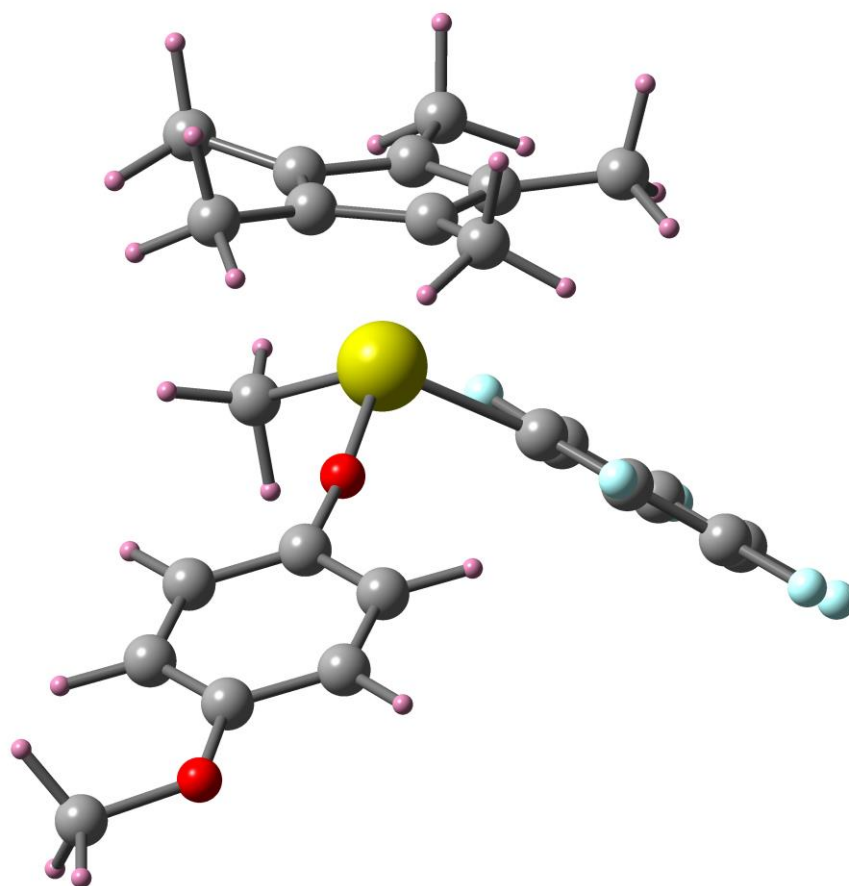

| <b>vacuum</b> | <b>toluene-like solvent</b> | <b>D3 dispersion</b> |
|---------------|-----------------------------|----------------------|
| -1636.8811517 | -1636.8876099               | -0.35418009          |

|    |             |             |             |
|----|-------------|-------------|-------------|
| Ti | 0.26821300  | 0.98106600  | -0.39028800 |
| C  | 0.23495400  | 1.52014000  | -2.41050600 |
| H  | 0.11993800  | 0.53492600  | -2.90320400 |
| H  | -0.62647100 | 2.15048900  | -2.68156600 |
| H  | 1.16530100  | 1.99397000  | -2.75422400 |
| O  | -1.30261300 | 0.13188200  | -0.37586000 |
| C  | -2.58526700 | -0.37371400 | -0.29441200 |
| C  | -2.91787700 | -1.32857100 | 0.70287800  |
| C  | -3.56726800 | 0.04040500  | -1.22420200 |
| C  | -4.21922100 | -1.84860800 | 0.76562300  |
| C  | -4.87560800 | -0.48235900 | -1.16205100 |
| C  | -5.20805600 | -1.42941100 | -0.16166600 |
| H  | -4.49027900 | -2.58509600 | 1.52216700  |
| H  | -5.61094500 | -0.14768900 | -1.89227500 |
| C  | 1.56585100  | 1.96648500  | 1.46889500  |
| C  | 1.85013000  | 2.79998100  | 0.32392300  |
| C  | 0.14603400  | 2.05082600  | 1.74184200  |
| C  | 0.61544600  | 3.40414300  | -0.11201400 |
| C  | -0.44330400 | 2.93512500  | 0.76104600  |
| C  | 1.68016700  | -0.69190000 | -0.21991800 |

|   |             |             |             |
|---|-------------|-------------|-------------|
| C | 2.77266900  | -0.85969600 | -1.08779600 |
| C | 1.49436200  | -1.75161700 | 0.68285400  |
| C | 3.61566400  | -1.98913100 | -1.09378500 |
| F | 3.08048600  | 0.15017300  | -2.02388700 |
| C | 2.29807300  | -2.90664100 | 0.73166900  |
| F | 0.45194700  | -1.68103400 | 1.63400000  |
| C | 3.37099500  | -3.02545100 | -0.17281200 |
| F | 4.68107400  | -2.09717500 | -1.98442900 |
| F | 2.05959700  | -3.92241700 | 1.65486700  |
| F | 4.18437100  | -4.15067400 | -0.15075600 |
| C | 2.59518500  | 1.29547200  | 2.35011300  |
| H | 2.97775900  | 2.01725500  | 3.09334600  |
| H | 2.17650800  | 0.44691500  | 2.90575500  |
| H | 3.45841800  | 0.92880900  | 1.77898400  |
| C | 3.21938600  | 3.08532700  | -0.24995300 |
| H | 3.63931700  | 3.99965300  | 0.20623200  |
| H | 3.92908500  | 2.27021900  | -0.05939600 |
| H | 3.18999800  | 3.24874900  | -1.33594900 |
| C | -0.56432100 | 1.44286400  | 2.93081700  |
| H | -0.13164600 | 0.47805200  | 3.22483600  |
| H | -0.48824700 | 2.11811400  | 3.80142300  |
| H | -1.63302800 | 1.28061300  | 2.73791500  |
| C | 0.48598000  | 4.49785700  | -1.14651400 |
| H | 0.65117600  | 5.48149000  | -0.67238000 |
| H | 1.22378900  | 4.39812800  | -1.95346500 |
| H | -0.51059200 | 4.52265600  | -1.60742300 |
| C | -1.87703200 | 3.41734900  | 0.74080100  |
| H | -2.56756900 | 2.69096100  | 1.18860300  |
| H | -1.96911000 | 4.35559100  | 1.31604400  |
| H | -2.23146800 | 3.62665000  | -0.27841500 |
| H | -2.15467300 | -1.65929600 | 1.40518200  |
| H | -3.30345700 | 0.76434900  | -1.99581500 |
| O | -6.46910800 | -2.02012500 | 0.00788000  |
| C | -7.54743200 | -1.65745900 | -0.91392800 |
| H | -7.29850600 | -1.92949700 | -1.95395600 |
| H | -8.41366900 | -2.24108500 | -0.57900900 |
| H | -7.78289300 | -0.58078100 | -0.85681500 |

|                |          |          |          |
|----------------|----------|----------|----------|
| Frequencies -- | 16.6872  | 17.6406  | 23.5011  |
| Frequencies -- | 31.9579  | 41.1046  | 47.7103  |
| Frequencies -- | 72.7553  | 80.3192  | 95.3432  |
| Frequencies -- | 97.2964  | 104.1388 | 114.5990 |
| Frequencies -- | 117.0214 | 118.9808 | 124.0974 |
| Frequencies -- | 125.3210 | 127.9882 | 148.2372 |
| Frequencies -- | 148.6484 | 155.5865 | 157.6085 |
| Frequencies -- | 163.4429 | 171.4319 | 185.0414 |
| Frequencies -- | 203.6759 | 204.9395 | 212.2022 |
| Frequencies -- | 221.6520 | 229.0886 | 241.9482 |
| Frequencies -- | 264.4018 | 264.9851 | 272.5847 |
| Frequencies -- | 285.9964 | 290.4219 | 294.6283 |
| Frequencies -- | 296.9146 | 299.1249 | 305.7330 |
| Frequencies -- | 325.5503 | 346.0536 | 363.2983 |
| Frequencies -- | 386.0324 | 390.4522 | 404.0466 |
| Frequencies -- | 409.1983 | 419.5464 | 427.6343 |
| Frequencies -- | 433.1134 | 461.5060 | 479.8710 |
| Frequencies -- | 508.5199 | 520.5799 | 536.6921 |
| Frequencies -- | 540.7891 | 542.7314 | 556.2393 |
| Frequencies -- | 567.1544 | 576.9638 | 583.3587 |
| Frequencies -- | 596.3680 | 608.7604 | 614.3377 |

|                |           |           |           |
|----------------|-----------|-----------|-----------|
| Frequencies -- | 634.0756  | 638.2468  | 671.4668  |
| Frequencies -- | 689.7666  | 716.3250  | 723.4007  |
| Frequencies -- | 729.8655  | 766.6461  | 802.6944  |
| Frequencies -- | 804.4021  | 805.2119  | 832.0880  |
| Frequencies -- | 884.3243  | 921.4834  | 943.0283  |
| Frequencies -- | 968.0039  | 971.3014  | 973.6009  |
| Frequencies -- | 993.9402  | 996.3344  | 1013.4620 |
| Frequencies -- | 1037.8887 | 1043.5747 | 1045.0565 |
| Frequencies -- | 1049.4502 | 1050.8172 | 1052.5335 |
| Frequencies -- | 1087.1991 | 1087.9244 | 1121.1925 |
| Frequencies -- | 1124.3253 | 1126.8220 | 1171.2761 |
| Frequencies -- | 1172.3043 | 1173.8424 | 1176.8428 |
| Frequencies -- | 1187.8243 | 1189.5587 | 1229.1798 |
| Frequencies -- | 1267.8834 | 1288.9488 | 1316.6659 |
| Frequencies -- | 1356.9138 | 1358.7154 | 1398.4441 |
| Frequencies -- | 1411.8519 | 1413.4005 | 1423.9985 |
| Frequencies -- | 1424.5622 | 1427.4294 | 1430.7398 |
| Frequencies -- | 1432.4016 | 1433.9427 | 1435.1640 |
| Frequencies -- | 1438.0759 | 1450.4989 | 1453.9876 |
| Frequencies -- | 1455.6844 | 1458.5704 | 1463.3056 |
| Frequencies -- | 1480.9963 | 1482.5210 | 1488.1332 |
| Frequencies -- | 1490.9710 | 1491.1338 | 1497.7751 |
| Frequencies -- | 1499.4674 | 1504.6671 | 1505.1749 |
| Frequencies -- | 1507.1108 | 1510.6290 | 1512.0251 |
| Frequencies -- | 1517.4160 | 1582.7430 | 1590.4021 |
| Frequencies -- | 1600.5226 | 1626.8014 | 2974.7128 |
| Frequencies -- | 2990.3939 | 3003.4203 | 3004.5604 |
| Frequencies -- | 3006.2237 | 3007.2317 | 3008.5478 |
| Frequencies -- | 3087.4529 | 3092.9850 | 3094.7650 |
| Frequencies -- | 3096.9660 | 3099.4668 | 3100.7580 |
| Frequencies -- | 3102.0732 | 3135.6396 | 3137.7273 |
| Frequencies -- | 3140.0348 | 3142.5035 | 3145.1782 |
| Frequencies -- | 3148.1849 | 3155.3133 | 3187.2468 |
| Frequencies -- | 3197.3784 | 3210.2649 | 3225.1528 |

**Catalyst 19:**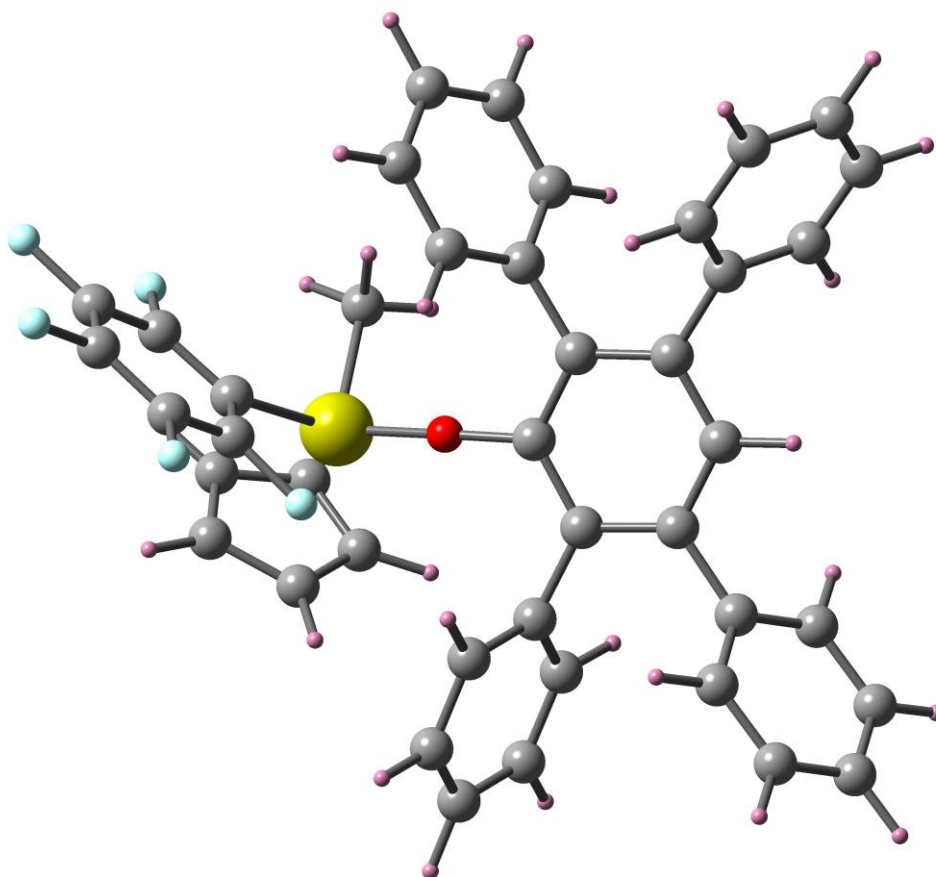

| <b>vacuum</b> | <b>toluene-like solvent</b> | <b>D3 dispersion</b> |
|---------------|-----------------------------|----------------------|
| -2249.709193  | -2249.7213047               | -0.57106567          |

|    |             |             |             |
|----|-------------|-------------|-------------|
| Ti | -1.78628300 | -0.90030800 | -1.37902300 |
| C  | -1.98243600 | 0.55598300  | -2.85894200 |
| H  | -2.06335500 | 1.47914500  | -2.26025300 |
| H  | -1.07356600 | 0.61505100  | -3.47962900 |
| H  | -2.86764000 | 0.44614200  | -3.49891300 |
| O  | -0.23441000 | -0.32627700 | -0.67963700 |
| C  | 1.03897700  | 0.07898200  | -0.29360800 |
| C  | 2.04806700  | -0.89618000 | -0.00888100 |
| C  | 1.30390400  | 1.48810300  | -0.25564200 |
| C  | 3.38194900  | -0.43632000 | 0.21221600  |
| C  | 2.64323700  | 1.91900300  | -0.01826300 |
| C  | 3.65258700  | 0.94863100  | 0.17079600  |
| C  | -3.12415500 | -2.98729400 | -1.41663300 |
| C  | -3.35383200 | -2.38788700 | -2.69814900 |
| C  | -1.72164800 | -3.27028700 | -1.30013500 |
| C  | -2.09710800 | -2.29873900 | -3.37920900 |
| C  | -1.08409300 | -2.84320300 | -2.51752500 |
| C  | -3.26614700 | -0.44223900 | 0.16013400  |
| C  | -4.52763700 | 0.10301900  | -0.13541300 |
| C  | -3.01764200 | -0.62542800 | 1.53067100  |

|   |             |             |             |
|---|-------------|-------------|-------------|
| C | -5.47800700 | 0.46958700  | 0.83772000  |
| F | -4.90009500 | 0.30498800  | -1.47944200 |
| C | -3.92606500 | -0.28411700 | 2.55173100  |
| F | -1.79463300 | -1.18929900 | 1.94495400  |
| C | -5.17017400 | 0.27239200  | 2.19765000  |
| F | -6.70895400 | 1.01468600  | 0.48308500  |
| F | -3.61930600 | -0.48722600 | 3.89532000  |
| F | -6.08619400 | 0.62184300  | 3.18091800  |
| H | 4.66906500  | 1.28598200  | 0.36891300  |
| C | 4.54067000  | -1.35121600 | 0.52038700  |
| C | 4.60975000  | -2.08781000 | 1.73079700  |
| C | 5.63901000  | -1.42813500 | -0.37513300 |
| C | 5.73520100  | -2.88375500 | 2.03097600  |
| H | 3.78775800  | -2.03102500 | 2.44533900  |
| C | 6.76350600  | -2.22904900 | -0.08117600 |
| H | 5.60923800  | -0.86510900 | -1.31079300 |
| C | 6.81597000  | -2.96181800 | 1.12481800  |
| H | 5.76808900  | -3.43872800 | 2.97164400  |
| H | 7.59374400  | -2.27878300 | -0.78994600 |
| H | 7.68611000  | -3.58049300 | 1.35667700  |
| C | 3.05426500  | 3.36527000  | 0.07785100  |
| C | 2.52890800  | 4.22721000  | 1.07509600  |
| C | 4.05176900  | 3.87809500  | -0.79273900 |
| C | 2.98018300  | 5.55834700  | 1.19298100  |
| H | 1.77286700  | 3.85469600  | 1.76700400  |
| C | 4.49960600  | 5.21180300  | -0.68276800 |
| H | 4.47074100  | 3.23280500  | -1.56807700 |
| C | 3.96504700  | 6.05900300  | 0.31260400  |
| H | 2.56430100  | 6.20148500  | 1.97226800  |
| H | 5.26159200  | 5.58613600  | -1.37074900 |
| H | 4.31143400  | 7.09122900  | 0.40271500  |
| C | 1.75314600  | -2.37025900 | 0.08193000  |
| C | 1.06036800  | -2.89338500 | 1.20367000  |
| C | 2.26181000  | -3.28036100 | -0.87900300 |
| C | 0.89769500  | -4.28544400 | 1.36927900  |
| H | 0.66562000  | -2.21248100 | 1.95808700  |
| C | 2.09150300  | -4.67228800 | -0.72290400 |
| H | 2.81173000  | -2.89872500 | -1.74154700 |
| C | 1.41376100  | -5.18166100 | 0.40675700  |
| H | 0.37566400  | -4.66631600 | 2.25030900  |
| H | 2.49825800  | -5.35571500 | -1.47196100 |
| H | 1.29358500  | -6.25955700 | 0.53706000  |
| C | 0.20761700  | 2.49719200  | -0.46493800 |
| C | -0.84193600 | 2.63361000  | 0.47946500  |
| C | 0.23030500  | 3.37964100  | -1.57479900 |
| C | -1.83129900 | 3.62756000  | 0.32581400  |
| H | -0.87324900 | 1.97276100  | 1.34751000  |
| C | -0.76011500 | 4.37040700  | -1.73573800 |
| H | 1.02794300  | 3.29312500  | -2.31429000 |
| C | -1.79470500 | 4.50141200  | -0.78323500 |
| H | -2.62479700 | 3.72137000  | 1.07110000  |
| H | -0.72215100 | 5.03852700  | -2.59922900 |
| H | -2.55994700 | 5.27160800  | -0.90273400 |
| H | -3.87791100 | -3.19246100 | -0.66365600 |
| H | -4.30554500 | -2.01633200 | -3.06597700 |
| H | -1.23088000 | -3.73369400 | -0.45376200 |
| H | -1.93451800 | -1.88353300 | -4.36832500 |

| H              | -0.02889600 | -2.93529200 | -2.74777300 |
|----------------|-------------|-------------|-------------|
| Frequencies -- | 10.5432     | 15.2403     | 20.1806     |
| Frequencies -- | 24.6008     | 33.0255     | 41.3445     |
| Frequencies -- | 43.3171     | 46.4612     | 47.1654     |
| Frequencies -- | 50.1327     | 56.3087     | 61.5112     |
| Frequencies -- | 63.0461     | 66.7397     | 70.8932     |
| Frequencies -- | 81.6509     | 87.7808     | 95.8258     |
| Frequencies -- | 110.2836    | 113.0717    | 120.7772    |
| Frequencies -- | 122.3765    | 135.7177    | 147.0045    |
| Frequencies -- | 156.0403    | 164.7000    | 184.9230    |
| Frequencies -- | 193.4031    | 196.7009    | 209.6300    |
| Frequencies -- | 210.9189    | 213.2763    | 228.1373    |
| Frequencies -- | 237.8169    | 246.3022    | 251.9508    |
| Frequencies -- | 256.3574    | 264.6745    | 265.4486    |
| Frequencies -- | 268.6856    | 288.6902    | 294.1304    |
| Frequencies -- | 316.4411    | 329.5179    | 336.4140    |
| Frequencies -- | 344.3743    | 367.0283    | 385.7647    |
| Frequencies -- | 401.1393    | 405.3616    | 406.1570    |
| Frequencies -- | 408.2203    | 408.4203    | 409.9838    |
| Frequencies -- | 427.9070    | 440.3394    | 463.0552    |
| Frequencies -- | 491.0262    | 512.3164    | 518.6403    |
| Frequencies -- | 528.9037    | 543.2383    | 544.1484    |
| Frequencies -- | 548.4016    | 563.4659    | 571.5760    |
| Frequencies -- | 579.9949    | 598.3824    | 614.4486    |
| Frequencies -- | 616.6684    | 617.8584    | 620.4380    |
| Frequencies -- | 624.3743    | 634.6366    | 635.3335    |
| Frequencies -- | 640.9034    | 656.0535    | 685.4977    |
| Frequencies -- | 690.4137    | 692.0744    | 696.0154    |
| Frequencies -- | 710.1990    | 710.5025    | 711.4969    |
| Frequencies -- | 713.8182    | 729.4751    | 735.1018    |
| Frequencies -- | 738.8439    | 746.2681    | 764.3738    |
| Frequencies -- | 770.6304    | 782.9543    | 789.7335    |
| Frequencies -- | 797.7373    | 805.1385    | 809.3301    |
| Frequencies -- | 817.5300    | 842.5572    | 844.5885    |
| Frequencies -- | 858.7339    | 859.0456    | 859.9182    |
| Frequencies -- | 864.1581    | 865.9595    | 879.0765    |
| Frequencies -- | 887.9528    | 908.7955    | 909.3395    |
| Frequencies -- | 933.7437    | 934.3095    | 938.0505    |
| Frequencies -- | 940.1742    | 963.5593    | 985.3149    |
| Frequencies -- | 986.0254    | 990.7186    | 991.2193    |
| Frequencies -- | 995.5027    | 997.4282    | 1002.9929   |
| Frequencies -- | 1003.5075   | 1005.6111   | 1006.3261   |
| Frequencies -- | 1013.2902   | 1019.9864   | 1026.7923   |
| Frequencies -- | 1030.9638   | 1034.6693   | 1040.8363   |
| Frequencies -- | 1042.5392   | 1046.4012   | 1050.4103   |
| Frequencies -- | 1053.3783   | 1055.1678   | 1089.2061   |
| Frequencies -- | 1090.3563   | 1090.7718   | 1091.0479   |
| Frequencies -- | 1091.1776   | 1094.6057   | 1128.7440   |
| Frequencies -- | 1129.8455   | 1133.7026   | 1182.0279   |
| Frequencies -- | 1182.0624   | 1182.1459   | 1183.0602   |
| Frequencies -- | 1183.4329   | 1192.6962   | 1203.7239   |
| Frequencies -- | 1204.9765   | 1206.3804   | 1207.0840   |
| Frequencies -- | 1230.5755   | 1268.0020   | 1280.3963   |
| Frequencies -- | 1286.9902   | 1294.2104   | 1303.1940   |
| Frequencies -- | 1323.4969   | 1327.6318   | 1331.3240   |
| Frequencies -- | 1332.7800   | 1334.4873   | 1355.9918   |
| Frequencies -- | 1365.9156   | 1367.7277   | 1369.7693   |
| Frequencies -- | 1370.6184   | 1380.5701   | 1391.3303   |
| Frequencies -- | 1400.0038   | 1402.7073   | 1428.4280   |
| Frequencies -- | 1437.1658   | 1440.5851   | 1443.0277   |
| Frequencies -- | 1445.0584   | 1447.7979   | 1448.4472   |
| Frequencies -- | 1448.9830   | 1453.8677   | 1455.8613   |

|                |           |           |           |
|----------------|-----------|-----------|-----------|
| Frequencies -- | 1496.7210 | 1497.3915 | 1502.4112 |
| Frequencies -- | 1508.8222 | 1529.7886 | 1588.9804 |
| Frequencies -- | 1590.9731 | 1594.1949 | 1596.0071 |
| Frequencies -- | 1597.1782 | 1599.6631 | 1600.5601 |
| Frequencies -- | 1622.5277 | 1623.2749 | 1624.0781 |
| Frequencies -- | 1624.6757 | 2996.9217 | 3114.3164 |
| Frequencies -- | 3150.0522 | 3150.9419 | 3151.5491 |
| Frequencies -- | 3154.0092 | 3155.1742 | 3158.6257 |
| Frequencies -- | 3159.4428 | 3161.4640 | 3162.3670 |
| Frequencies -- | 3171.5173 | 3172.3438 | 3175.0750 |
| Frequencies -- | 3177.2719 | 3184.0942 | 3184.2069 |
| Frequencies -- | 3185.1281 | 3187.8895 | 3192.1330 |
| Frequencies -- | 3195.8640 | 3196.0010 | 3197.3028 |
| Frequencies -- | 3200.5890 | 3244.1472 | 3255.8743 |
| Frequencies -- | 3268.2460 | 3276.5751 | 3300.0514 |

**Catalyst 20:****distal conformation**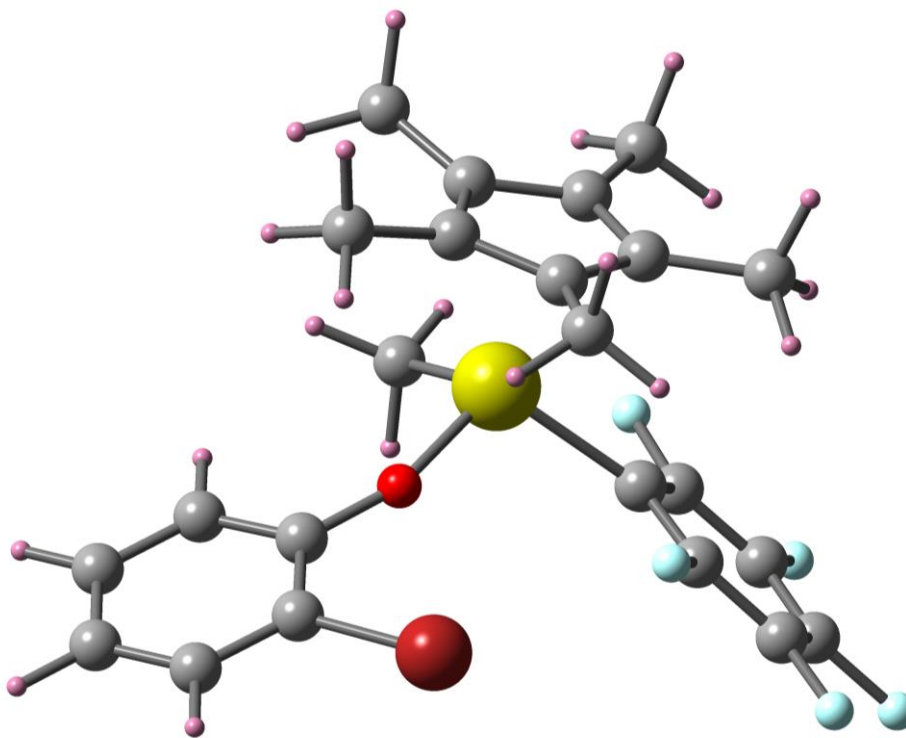

| <b>vacuum</b> | <b>toluene-like solvent</b> | <b>D3 dispersion</b> |
|---------------|-----------------------------|----------------------|
| -1534.960218  | -1534.9661905               | -0.34871185          |

|    |             |             |             |
|----|-------------|-------------|-------------|
| Ti | 0.04837400  | 1.06312100  | -0.30356300 |
| C  | 0.08451600  | 1.91162100  | -2.21473900 |
| H  | 0.13199600  | 1.01996800  | -2.86855800 |
| H  | -0.81065600 | 2.49638800  | -2.47125400 |
| H  | 0.97990100  | 2.52701100  | -2.37581300 |
| O  | -1.41862800 | 0.04132000  | -0.60736100 |
| C  | -2.65060600 | -0.37717700 | -1.04861100 |
| C  | -3.36942900 | -1.44460000 | -0.43887500 |
| C  | -3.23431100 | 0.26276600  | -2.17805600 |
| C  | -4.62436600 | -1.84796700 | -0.94348600 |
| C  | -4.48458500 | -0.13915000 | -2.67952600 |
| C  | -5.18618600 | -1.19738400 | -2.06138300 |
| H  | -5.15635300 | -2.66931500 | -0.46275000 |
| H  | -4.90565500 | 0.36971800  | -3.54917700 |
| C  | 1.14528000  | 2.01584900  | 1.70174700  |
| C  | 1.22967000  | 3.04154100  | 0.68934500  |
| C  | -0.25670000 | 1.76378900  | 1.96518400  |
| C  | -0.11216200 | 3.43100000  | 0.32689700  |
| C  | -1.03510200 | 2.63273200  | 1.10981900  |
| C  | 1.76239600  | -0.31154100 | -0.31743100 |
| C  | 2.86851300  | -0.19294500 | -1.17861100 |
| C  | 1.77441300  | -1.47537100 | 0.47138200  |



|    |             |             |             |
|----|-------------|-------------|-------------|
| C  | 3.89189800  | -1.15597800 | -1.29309700 |
| F  | 3.01372600  | 0.95177300  | -1.98855800 |
| C  | 2.76269300  | -2.47600200 | 0.40476400  |
| F  | 0.75312200  | -1.67126300 | 1.42008500  |
| C  | 3.83271800  | -2.31416000 | -0.49583700 |
| F  | 4.95810700  | -0.97872500 | -2.17146300 |
| F  | 2.70878200  | -3.60728400 | 1.21483700  |
| F  | 4.82611100  | -3.27967300 | -0.58608900 |
| C  | 2.30786500  | 1.46353700  | 2.49424200  |
| H  | 2.54336900  | 2.14383500  | 3.33177300  |
| H  | 2.08633600  | 0.47971800  | 2.92594700  |
| H  | 3.21834600  | 1.36726300  | 1.88787800  |
| C  | 2.50215200  | 3.67730100  | 0.17881800  |
| H  | 2.79039500  | 4.52360600  | 0.82772000  |
| H  | 3.34489300  | 2.97388000  | 0.16819100  |
| H  | 2.38922200  | 4.07340800  | -0.83920500 |
| C  | -0.80985200 | 0.87923300  | 3.05862800  |
| H  | -1.78836700 | 0.45636600  | 2.79929700  |
| H  | -0.14449300 | 0.03979000  | 3.29242100  |
| H  | -0.93918300 | 1.46957800  | 3.98331700  |
| C  | -0.48511100 | 4.61196700  | -0.53836700 |
| H  | -0.45257700 | 5.53723900  | 0.06336100  |
| H  | 0.20266400  | 4.74962200  | -1.38296400 |
| H  | -1.50159100 | 4.52575900  | -0.94512500 |
| C  | -2.53691100 | 2.80910600  | 1.15396200  |
| H  | -3.05144700 | 1.90220900  | 1.49724500  |
| H  | -2.80102000 | 3.62042400  | 1.85513300  |
| H  | -2.95766200 | 3.07758700  | 0.17485200  |
| H  | -2.68331400 | 1.07168600  | -2.65338200 |
| H  | -6.15710400 | -1.51959800 | -2.44133500 |
| Br | -2.64720800 | -2.40279500 | 1.10628000  |

|                |          |           |           |
|----------------|----------|-----------|-----------|
| Frequencies -- | 8.6152   | 15.7279   | 24.0391   |
| Frequencies -- | 33.5744  | 42.8923   | 53.9052   |
| Frequencies -- | 66.7608  | 88.0704   | 91.3623   |
| Frequencies -- | 97.2476  | 102.4993  | 107.9330  |
| Frequencies -- | 112.8711 | 115.9853  | 122.6260  |
| Frequencies -- | 124.2036 | 127.1683  | 131.1956  |
| Frequencies -- | 151.4492 | 157.5378  | 161.5835  |
| Frequencies -- | 164.2381 | 173.8638  | 183.5746  |
| Frequencies -- | 204.4693 | 212.4507  | 241.5295  |
| Frequencies -- | 254.2409 | 264.3734  | 269.2547  |
| Frequencies -- | 271.3982 | 284.6461  | 287.9890  |
| Frequencies -- | 293.6478 | 296.1543  | 297.9984  |
| Frequencies -- | 301.0487 | 310.7334  | 321.9697  |
| Frequencies -- | 344.1434 | 356.4724  | 382.3570  |
| Frequencies -- | 386.8662 | 391.1938  | 417.3068  |
| Frequencies -- | 428.3119 | 447.6359  | 461.5721  |
| Frequencies -- | 493.2572 | 502.4161  | 535.1663  |
| Frequencies -- | 539.6315 | 542.5072  | 544.2904  |
| Frequencies -- | 555.9273 | 573.2284  | 584.0215  |
| Frequencies -- | 594.8723 | 603.8806  | 613.3200  |
| Frequencies -- | 627.6362 | 634.5146  | 661.5998  |
| Frequencies -- | 688.2380 | 693.9496  | 713.5339  |
| Frequencies -- | 722.7237 | 730.5703  | 763.3746  |
| Frequencies -- | 802.6692 | 804.6621  | 862.4490  |
| Frequencies -- | 887.8109 | 912.7598  | 952.2851  |
| Frequencies -- | 967.3028 | 970.7527  | 987.8264  |
| Frequencies -- | 997.3049 | 1032.5966 | 1041.5406 |

|                |           |           |           |
|----------------|-----------|-----------|-----------|
| Frequencies -- | 1043.3137 | 1044.4336 | 1047.7606 |
| Frequencies -- | 1048.6739 | 1049.7101 | 1055.0354 |
| Frequencies -- | 1087.1137 | 1088.4341 | 1124.3728 |
| Frequencies -- | 1131.9029 | 1172.8229 | 1176.7458 |
| Frequencies -- | 1177.9468 | 1182.4661 | 1191.3269 |
| Frequencies -- | 1255.2119 | 1273.5632 | 1291.2765 |
| Frequencies -- | 1353.1588 | 1354.0175 | 1396.9340 |
| Frequencies -- | 1411.1623 | 1412.4382 | 1422.6033 |
| Frequencies -- | 1424.7877 | 1427.7409 | 1430.0305 |
| Frequencies -- | 1431.0727 | 1434.1806 | 1436.7282 |
| Frequencies -- | 1448.1479 | 1450.5595 | 1455.1995 |
| Frequencies -- | 1457.7184 | 1461.6370 | 1470.0280 |
| Frequencies -- | 1478.5245 | 1490.4212 | 1491.3238 |
| Frequencies -- | 1497.3136 | 1498.8742 | 1503.7920 |
| Frequencies -- | 1505.8090 | 1510.6941 | 1512.2091 |
| Frequencies -- | 1514.7572 | 1576.9045 | 1589.1681 |
| Frequencies -- | 1597.9690 | 1600.2937 | 2982.1231 |
| Frequencies -- | 3004.7027 | 3005.0791 | 3007.1684 |
| Frequencies -- | 3008.2072 | 3009.3734 | 3095.6301 |
| Frequencies -- | 3098.1711 | 3099.3573 | 3101.8329 |
| Frequencies -- | 3105.9453 | 3110.8525 | 3136.3972 |
| Frequencies -- | 3139.9648 | 3142.2770 | 3147.3435 |
| Frequencies -- | 3149.2286 | 3157.4383 | 3168.1615 |
| Frequencies -- | 3185.5256 | 3204.6864 | 3225.5487 |

**proximal conformation**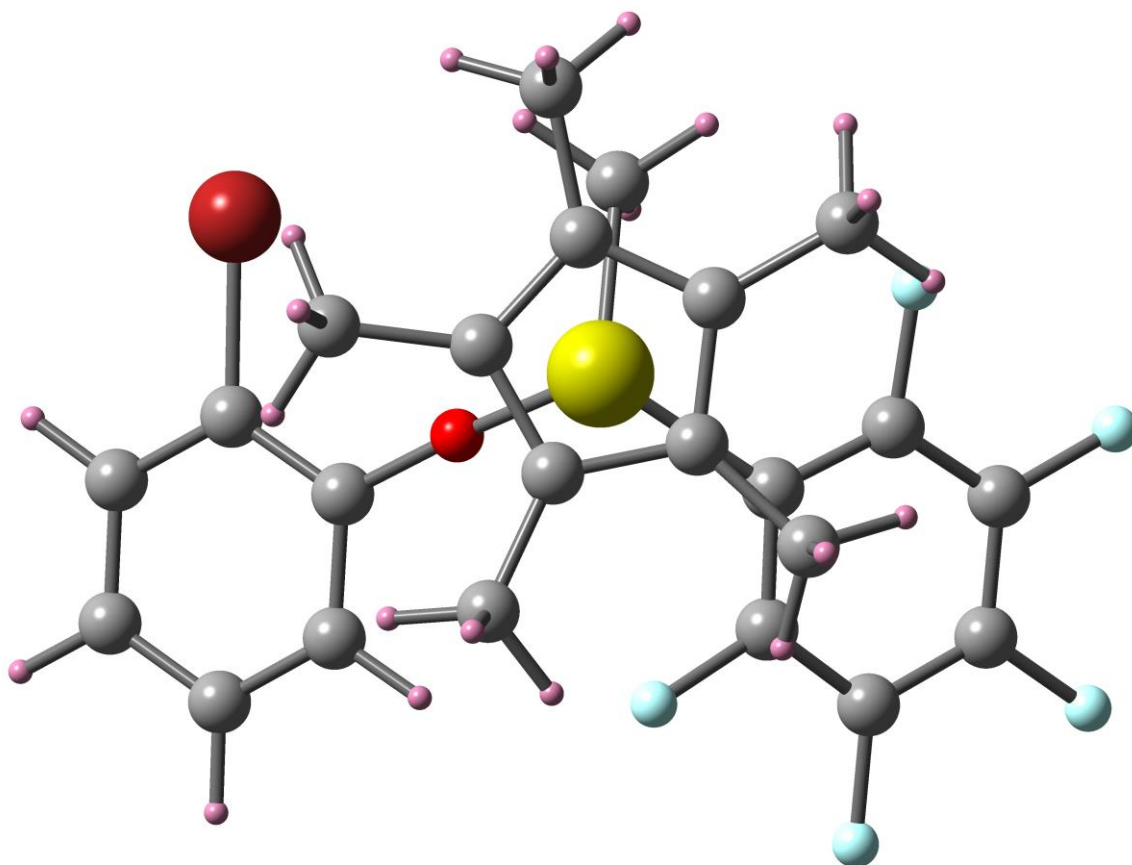

| <b>vacuum</b> | <b>toluene-like solvent</b> | <b>D3 dispersion</b> |
|---------------|-----------------------------|----------------------|
| -1534.9642684 | -1534.969783                | -0.34901748          |

|    |             |             |             |
|----|-------------|-------------|-------------|
| Ti | -0.01606600 | 0.79134800  | -0.10165900 |
| C  | -0.38887300 | 1.46757200  | -2.03154900 |
| H  | -0.22974000 | 0.54065400  | -2.61609800 |
| H  | -1.42761600 | 1.79461900  | -2.17492200 |
| H  | 0.30854100  | 2.24430800  | -2.37185100 |
| O  | -1.22922000 | -0.54891600 | -0.04701800 |
| C  | -2.16574300 | -1.51623200 | 0.21895700  |
| C  | -1.86097600 | -2.54777600 | 1.15004500  |
| C  | -3.43643100 | -1.54911100 | -0.42337300 |
| C  | -2.78840200 | -3.56583000 | 1.43474400  |
| C  | -4.36778600 | -2.56872500 | -0.13650800 |
| C  | -4.04720800 | -3.57878400 | 0.79481200  |
| H  | -2.52481200 | -4.34719100 | 2.15049700  |
| H  | -5.33385400 | -2.57415900 | -0.64199000 |
| C  | 1.13495800  | 2.05558600  | 1.68234000  |
| C  | 0.90363900  | 3.01037800  | 0.62234500  |
| C  | -0.15344200 | 1.58920300  | 2.15179300  |
| C  | -0.52013500 | 3.13947700  | 0.43375200  |
| C  | -1.17685800 | 2.25530300  | 1.37799100  |
| C  | 1.90350500  | -0.27208700 | -0.25881100 |

|    |             |             |             |
|----|-------------|-------------|-------------|
| C  | 2.86792300  | 0.01332100  | -1.24294300 |
| C  | 2.22122800  | -1.38115000 | 0.54243400  |
| C  | 4.03841300  | -0.74422900 | -1.45225500 |
| F  | 2.70127400  | 1.12924100  | -2.08749000 |
| C  | 3.36939400  | -2.18096600 | 0.38796800  |
| F  | 1.36218900  | -1.73660000 | 1.60796900  |
| C  | 4.28804800  | -1.85833100 | -0.62901700 |
| F  | 4.95094400  | -0.40752700 | -2.44841200 |
| F  | 3.61650300  | -3.26923400 | 1.22149900  |
| F  | 5.43249900  | -2.62267900 | -0.80903700 |
| C  | 2.46825200  | 1.77119900  | 2.33562600  |
| H  | 2.67442100  | 2.53575000  | 3.10555300  |
| H  | 2.48866900  | 0.79420500  | 2.83462000  |
| H  | 3.29998400  | 1.79952300  | 1.61943900  |
| C  | 1.96345300  | 3.82368800  | -0.08414900 |
| H  | 2.13543700  | 4.77155600  | 0.45659000  |
| H  | 2.92558600  | 3.29859200  | -0.13715800 |
| H  | 1.67263500  | 4.08435600  | -1.11058400 |
| C  | -0.38991300 | 0.69887200  | 3.35110300  |
| H  | 0.42324000  | -0.02206300 | 3.50148200  |
| H  | -0.45928300 | 1.31367000  | 4.26592800  |
| H  | -1.32630500 | 0.13081600  | 3.27122500  |
| C  | -1.20806400 | 4.16580100  | -0.43552600 |
| H  | -1.29677500 | 5.12019100  | 0.11280800  |
| H  | -0.65182000 | 4.37166000  | -1.35931800 |
| H  | -2.22285600 | 3.85743900  | -0.72005800 |
| C  | -2.66701200 | 2.18532000  | 1.62681800  |
| H  | -2.96854000 | 1.23412800  | 2.08443200  |
| H  | -2.96861500 | 2.99157900  | 2.31876000  |
| H  | -3.25280000 | 2.30897300  | 0.70645600  |
| H  | -0.88460100 | -2.53490200 | 1.62814900  |
| H  | -4.77331900 | -4.36506200 | 1.00806400  |
| Br | -3.94053900 | -0.19087900 | -1.74799200 |

|                |          |          |          |
|----------------|----------|----------|----------|
| Frequencies -- | 13.0686  | 15.4785  | 22.9017  |
| Frequencies -- | 35.0950  | 44.3132  | 54.1090  |
| Frequencies -- | 69.3719  | 82.8366  | 93.4929  |
| Frequencies -- | 97.1340  | 103.7939 | 111.6181 |
| Frequencies -- | 113.6232 | 118.5130 | 125.1276 |
| Frequencies -- | 127.2910 | 130.9725 | 144.8987 |
| Frequencies -- | 154.0828 | 156.6320 | 165.7670 |
| Frequencies -- | 172.5304 | 172.9917 | 191.9511 |
| Frequencies -- | 206.9568 | 211.2812 | 224.9147 |
| Frequencies -- | 230.4963 | 245.7761 | 264.7689 |
| Frequencies -- | 267.4035 | 281.4419 | 287.4307 |
| Frequencies -- | 292.1526 | 294.2459 | 295.5339 |
| Frequencies -- | 298.4499 | 314.0579 | 319.4314 |
| Frequencies -- | 343.7693 | 351.6275 | 384.1275 |
| Frequencies -- | 385.7364 | 388.6579 | 414.1388 |
| Frequencies -- | 428.0449 | 447.9023 | 460.7030 |
| Frequencies -- | 487.5487 | 514.6075 | 535.3441 |
| Frequencies -- | 539.3031 | 543.1481 | 544.5679 |
| Frequencies -- | 554.0910 | 570.7302 | 583.5806 |
| Frequencies -- | 595.8966 | 606.4269 | 611.1299 |
| Frequencies -- | 628.0266 | 633.3240 | 657.2092 |
| Frequencies -- | 684.5131 | 690.2280 | 713.2708 |
| Frequencies -- | 721.4318 | 728.7204 | 766.4941 |
| Frequencies -- | 801.6198 | 802.8323 | 869.8860 |
| Frequencies -- | 884.2674 | 918.8471 | 958.1317 |

|                |           |           |           |
|----------------|-----------|-----------|-----------|
| Frequencies -- | 965.4659  | 968.4729  | 991.9053  |
| Frequencies -- | 994.8178  | 1030.5269 | 1037.1151 |
| Frequencies -- | 1042.7223 | 1043.8261 | 1047.3947 |
| Frequencies -- | 1049.0152 | 1049.9885 | 1054.7198 |
| Frequencies -- | 1085.4640 | 1087.2281 | 1122.9250 |
| Frequencies -- | 1133.0381 | 1172.6166 | 1174.1883 |
| Frequencies -- | 1176.4836 | 1183.6196 | 1190.1319 |
| Frequencies -- | 1258.5629 | 1277.9100 | 1289.7222 |
| Frequencies -- | 1351.6740 | 1353.5318 | 1393.2821 |
| Frequencies -- | 1409.7716 | 1411.2739 | 1421.0041 |
| Frequencies -- | 1422.5234 | 1426.9057 | 1427.5793 |
| Frequencies -- | 1430.0343 | 1431.0378 | 1435.1808 |
| Frequencies -- | 1435.4202 | 1450.6788 | 1454.5652 |
| Frequencies -- | 1456.7063 | 1462.5465 | 1471.0496 |
| Frequencies -- | 1478.2150 | 1490.7574 | 1491.0183 |
| Frequencies -- | 1496.8421 | 1498.6426 | 1503.6747 |
| Frequencies -- | 1505.9158 | 1509.3229 | 1511.5023 |
| Frequencies -- | 1515.1949 | 1575.7862 | 1586.9952 |
| Frequencies -- | 1598.1790 | 1600.4840 | 2980.9712 |
| Frequencies -- | 3004.6281 | 3005.3948 | 3007.2160 |
| Frequencies -- | 3008.1237 | 3009.2361 | 3098.7631 |
| Frequencies -- | 3099.6650 | 3100.5933 | 3101.6779 |
| Frequencies -- | 3103.5387 | 3110.9799 | 3138.2678 |
| Frequencies -- | 3142.2969 | 3143.1502 | 3146.6251 |
| Frequencies -- | 3149.6180 | 3160.2955 | 3169.4560 |
| Frequencies -- | 3185.6356 | 3203.6858 | 3237.6194 |

**Catalyst 21:****distal conformation**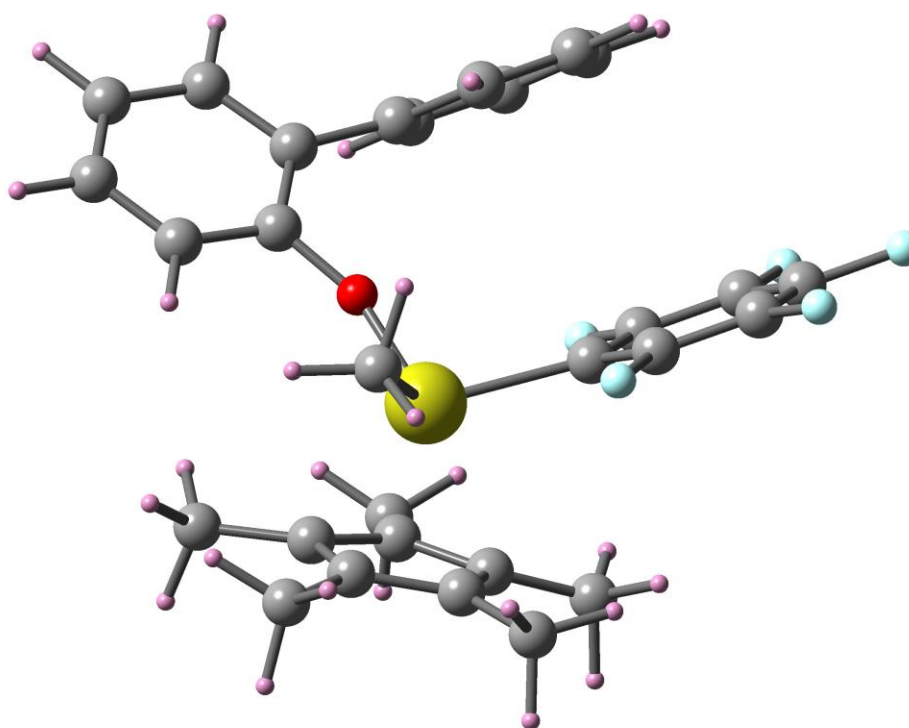

| <b>vacuum</b> | <b>toluene-like solvent</b> | <b>D3 dispersion</b> |
|---------------|-----------------------------|----------------------|
| -1753.3483892 | -1753.3551959               | -0.41820584          |

|    |             |             |             |
|----|-------------|-------------|-------------|
| Ti | 0.18194800  | -1.32410200 | -0.30221400 |
| C  | 0.32616300  | -2.11490500 | -2.23212600 |
| H  | 0.23265200  | -1.20644900 | -2.85766800 |
| H  | 1.29292500  | -2.59344200 | -2.45012800 |
| H  | -0.49108800 | -2.80921500 | -2.47253700 |
| O  | 1.54529900  | -0.16405500 | -0.52658300 |
| C  | 2.80623100  | 0.34296800  | -0.79524700 |
| C  | 3.13668400  | 1.70900100  | -0.53440900 |
| C  | 3.78091100  | -0.53952700 | -1.33274000 |
| C  | 4.47798200  | 2.11284400  | -0.77394500 |
| C  | 5.09458700  | -0.10273100 | -1.57842700 |
| C  | 5.45193500  | 1.23081200  | -1.28238600 |
| H  | 4.74333200  | 3.15380200  | -0.58090700 |
| H  | 5.82894200  | -0.79649500 | -1.99405800 |
| C  | -0.86119200 | -2.33829700 | 1.71354100  |
| C  | -0.96578600 | -3.33605000 | 0.67580100  |
| C  | 0.54452400  | -2.07825500 | 1.94399000  |
| C  | 0.36817900  | -3.71522000 | 0.27699100  |
| C  | 1.30508400  | -2.93495700 | 1.06127900  |
| C  | -1.62938000 | -0.08354100 | -0.30569700 |

|                |             |             |             |
|----------------|-------------|-------------|-------------|
| C              | -2.68511100 | -0.23573500 | -1.22187400 |
| C              | -1.77415200 | 1.01110700  | 0.56375400  |
| C              | -3.79325900 | 0.63181300  | -1.30495500 |
| F              | -2.68160800 | -1.31736500 | -2.12666100 |
| C              | -2.85595400 | 1.91079400  | 0.53676900  |
| F              | -0.79599600 | 1.23789900  | 1.55058000  |
| C              | -3.87465300 | 1.72009300  | -0.41629300 |
| F              | -4.80512400 | 0.42992600  | -2.24105000 |
| F              | -2.94088300 | 2.97773300  | 1.42827300  |
| F              | -4.95337800 | 2.59355300  | -0.47364400 |
| C              | -2.00195800 | -1.82437000 | 2.56136700  |
| H              | -2.20356700 | -2.53926800 | 3.37875300  |
| H              | -1.77180800 | -0.85723000 | 3.02370800  |
| H              | -2.93366400 | -1.71375600 | 1.99098500  |
| C              | -2.24753000 | -3.95947600 | 0.17239200  |
| H              | -2.49422900 | -4.85783900 | 0.76609400  |
| H              | -3.10093900 | -3.27331300 | 0.24999400  |
| H              | -2.17216200 | -4.27458200 | -0.87717500 |
| C              | 1.11489200  | -1.18916200 | 3.02667500  |
| H              | 0.53720900  | -0.26497400 | 3.15316000  |
| H              | 1.10755000  | -1.72050700 | 3.99499900  |
| H              | 2.15470400  | -0.90342100 | 2.81938500  |
| C              | 0.71893200  | -4.88118000 | -0.61758700 |
| H              | 0.72274900  | -5.81446900 | -0.02722700 |
| H              | -0.00374800 | -5.01617600 | -1.43303800 |
| H              | 1.71430500  | -4.77889900 | -1.06988100 |
| C              | 2.80243200  | -3.14401000 | 1.11012500  |
| H              | 3.35015400  | -2.22368100 | 1.34917700  |
| H              | 3.04817900  | -3.88305200 | 1.89323800  |
| H              | 3.20182300  | -3.53274000 | 0.16405000  |
| H              | 3.49286100  | -1.56637500 | -1.54943500 |
| H              | 6.46866000  | 1.58515400  | -1.46244800 |
| C              | 2.15428800  | 2.74235300  | -0.06834600 |
| C              | 2.37889400  | 3.45804900  | 1.13610700  |
| C              | 1.04209600  | 3.10734600  | -0.87041200 |
| C              | 1.51638700  | 4.50204800  | 1.53246500  |
| H              | 3.22617500  | 3.18741600  | 1.77009200  |
| C              | 0.18735000  | 4.16000900  | -0.48386800 |
| H              | 0.86062100  | 2.58087300  | -1.80939400 |
| C              | 0.41848600  | 4.86005900  | 0.72071800  |
| H              | 1.70079400  | 5.03131400  | 2.47039400  |
| H              | -0.65622700 | 4.43482700  | -1.12181700 |
| H              | -0.25093700 | 5.66819000  | 1.02362800  |
| Frequencies -- | 12.6330     | 21.3482     | 26.3924     |
| Frequencies -- | 34.7604     | 41.2987     | 46.7760     |
| Frequencies -- | 62.2782     | 65.5333     | 74.4073     |
| Frequencies -- | 82.2527     | 89.1700     | 93.7951     |
| Frequencies -- | 102.3653    | 114.4342    | 122.3992    |
| Frequencies -- | 124.8485    | 126.8471    | 134.4586    |
| Frequencies -- | 135.9188    | 142.2622    | 155.8310    |
| Frequencies -- | 160.2747    | 162.5743    | 173.5844    |
| Frequencies -- | 177.5073    | 188.6218    | 202.5298    |
| Frequencies -- | 209.0304    | 227.3904    | 236.9763    |
| Frequencies -- | 263.6802    | 265.1633    | 271.6781    |
| Frequencies -- | 281.2905    | 286.6338    | 287.6127    |
| Frequencies -- | 293.4992    | 297.1182    | 300.2993    |
| Frequencies -- | 303.9075    | 324.2059    | 339.2766    |

|                |           |           |           |
|----------------|-----------|-----------|-----------|
| Frequencies -- | 345.4511  | 355.1169  | 385.5691  |
| Frequencies -- | 387.5343  | 389.0889  | 405.8608  |
| Frequencies -- | 413.1293  | 428.3088  | 461.7600  |
| Frequencies -- | 483.3276  | 498.7650  | 505.3067  |
| Frequencies -- | 534.4113  | 539.9873  | 543.6005  |
| Frequencies -- | 547.7343  | 554.6769  | 561.3369  |
| Frequencies -- | 565.1939  | 584.4593  | 595.8305  |
| Frequencies -- | 604.5203  | 615.9629  | 616.5628  |
| Frequencies -- | 622.1948  | 634.7943  | 643.8111  |
| Frequencies -- | 679.6310  | 690.9242  | 707.6544  |
| Frequencies -- | 724.8368  | 730.0633  | 739.4499  |
| Frequencies -- | 743.5870  | 765.2552  | 777.3657  |
| Frequencies -- | 802.1353  | 805.1013  | 858.5774  |
| Frequencies -- | 873.0493  | 886.6809  | 911.8304  |
| Frequencies -- | 930.4199  | 955.2536  | 967.5731  |
| Frequencies -- | 969.9799  | 983.7105  | 987.7823  |
| Frequencies -- | 995.8746  | 1000.6830 | 1005.0417 |
| Frequencies -- | 1038.2111 | 1040.4665 | 1043.1555 |
| Frequencies -- | 1043.8201 | 1047.1210 | 1047.6138 |
| Frequencies -- | 1049.7241 | 1052.7691 | 1062.5557 |
| Frequencies -- | 1085.8100 | 1088.2915 | 1091.2055 |
| Frequencies -- | 1124.1341 | 1124.8295 | 1173.0559 |
| Frequencies -- | 1174.3930 | 1177.5738 | 1182.6155 |
| Frequencies -- | 1183.2799 | 1189.7984 | 1204.5932 |
| Frequencies -- | 1233.8694 | 1261.3847 | 1291.2855 |
| Frequencies -- | 1300.6813 | 1330.6981 | 1355.5789 |
| Frequencies -- | 1356.4043 | 1371.5567 | 1399.9343 |
| Frequencies -- | 1410.5816 | 1412.7347 | 1422.1662 |
| Frequencies -- | 1424.2270 | 1426.3252 | 1429.7356 |
| Frequencies -- | 1430.3525 | 1431.8271 | 1434.4079 |
| Frequencies -- | 1441.3641 | 1450.6622 | 1451.1773 |
| Frequencies -- | 1454.2785 | 1458.6769 | 1462.5438 |
| Frequencies -- | 1479.3295 | 1479.9743 | 1489.6118 |
| Frequencies -- | 1492.1610 | 1497.4288 | 1499.8254 |
| Frequencies -- | 1504.3272 | 1506.3363 | 1508.2420 |
| Frequencies -- | 1510.6021 | 1511.8190 | 1517.2904 |
| Frequencies -- | 1580.6419 | 1590.5444 | 1598.1003 |
| Frequencies -- | 1601.6086 | 1611.2144 | 1626.1631 |
| Frequencies -- | 2979.2921 | 3003.9773 | 3005.5645 |
| Frequencies -- | 3006.5763 | 3008.0540 | 3009.1653 |
| Frequencies -- | 3096.4005 | 3097.4502 | 3100.1933 |
| Frequencies -- | 3101.9803 | 3102.3152 | 3104.4115 |
| Frequencies -- | 3136.8514 | 3139.8104 | 3143.6437 |
| Frequencies -- | 3145.7933 | 3148.7385 | 3152.8560 |
| Frequencies -- | 3153.1737 | 3158.0305 | 3161.1526 |
| Frequencies -- | 3172.2975 | 3173.9451 | 3180.1919 |
| Frequencies -- | 3192.7831 | 3193.7287 | 3218.2306 |



**proximal conformation**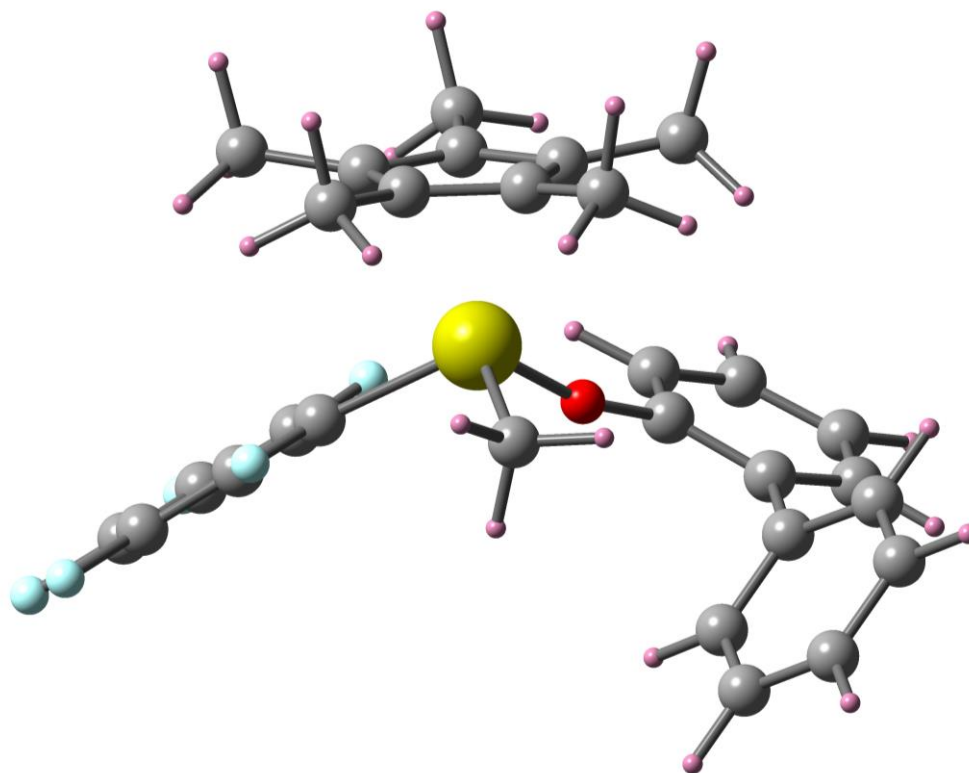

| <b>vacuum</b> | <b>toluene-like solvent</b> | <b>D3 dispersion</b> |
|---------------|-----------------------------|----------------------|
| -1753.3512701 | -1753.3582483               | -0.41681392          |

|    |             |             |             |
|----|-------------|-------------|-------------|
| Ti | -0.09218700 | 0.79380400  | -0.05596000 |
| C  | 0.52573000  | 1.31318900  | 1.86084500  |
| H  | 0.33569700  | 0.36806100  | 2.40404200  |
| H  | 1.60271200  | 1.52776100  | 1.91018900  |
| H  | -0.04824400 | 2.12455000  | 2.32549500  |
| O  | 1.10281800  | -0.51114000 | -0.38698600 |
| C  | 2.04762600  | -1.36056800 | -0.93778200 |
| C  | 1.75372900  | -1.99141400 | -2.17451600 |
| C  | 3.30480700  | -1.58101200 | -0.29362600 |
| C  | 2.70838100  | -2.80890100 | -2.80635400 |
| C  | 4.25408500  | -2.39388000 | -0.96762000 |
| C  | 3.97374800  | -2.99979700 | -2.20885200 |
| H  | 2.46369400  | -3.29188600 | -3.75506600 |
| H  | 5.21806200  | -2.57045700 | -0.48674900 |
| C  | -1.51506200 | 2.30666400  | -1.39109800 |
| C  | -0.93023800 | 3.14574200  | -0.37153300 |
| C  | -0.43986200 | 1.78479500  | -2.21080800 |
| C  | 0.50123600  | 3.13021700  | -0.54269500 |
| C  | 0.80791100  | 2.28807900  | -1.68317600 |
| C  | -1.96081300 | -0.32621800 | 0.26584500  |
| C  | -2.82446400 | -0.06426400 | 1.34419000  |
| C  | -2.33780900 | -1.43612800 | -0.50962300 |
| C  | -3.95526700 | -0.84042100 | 1.66701500  |
| F  | -2.58381700 | 1.04887500  | 2.17690300  |

|   |             |             |             |
|---|-------------|-------------|-------------|
| C | -3.45560400 | -2.25181600 | -0.24598700 |
| F | -1.58057000 | -1.78111300 | -1.65051500 |
| C | -4.27121600 | -1.95063500 | 0.86151900  |
| F | -4.76523000 | -0.52736300 | 2.75614800  |
| F | -3.77101400 | -3.33912500 | -1.05762100 |
| F | -5.38010200 | -2.73480900 | 1.15011100  |
| C | -2.99092800 | 2.18587600  | -1.69784400 |
| H | -3.30847700 | 3.02188600  | -2.34623600 |
| H | -3.22951000 | 1.25477800  | -2.22807300 |
| H | -3.61090200 | 2.22365800  | -0.79259600 |
| C | -1.69592500 | 3.98648900  | 0.62355800  |
| H | -1.93935100 | 4.96803800  | 0.17906300  |
| H | -2.64220500 | 3.51832900  | 0.92269900  |
| H | -1.11854100 | 4.18001400  | 1.53721100  |
| C | -0.62433700 | 1.00237100  | -3.49165300 |
| H | -1.40007500 | 0.23031100  | -3.40424900 |
| H | -0.93020100 | 1.68463100  | -4.30425000 |
| H | 0.30086300  | 0.50940800  | -3.81425500 |
| C | 1.49962200  | 3.98598200  | 0.20170600  |
| H | 1.62014300  | 4.95560200  | -0.31317800 |
| H | 1.18126200  | 4.19963700  | 1.22992600  |
| H | 2.49198000  | 3.51710300  | 0.25115500  |
| C | 2.17777800  | 2.12314400  | -2.30369300 |
| H | 2.22686100  | 1.25682500  | -2.97477900 |
| H | 2.43084300  | 3.01689000  | -2.90057600 |
| H | 2.97184500  | 1.99746600  | -1.55378600 |
| H | 0.77383600  | -1.83851600 | -2.61983200 |
| H | 4.72519900  | -3.62749800 | -2.69161800 |
| C | 3.65266400  | -1.04198600 | 1.06371900  |
| C | 2.95624400  | -1.48492200 | 2.21840800  |
| C | 4.74670000  | -0.15500100 | 1.23826800  |
| C | 3.34414700  | -1.06006400 | 3.50593100  |
| H | 2.12090200  | -2.17865900 | 2.10708100  |
| C | 5.13063700  | 0.28098600  | 2.52517600  |
| H | 5.29556500  | 0.19841100  | 0.36240200  |
| C | 4.43229800  | -0.17342000 | 3.66533800  |
| H | 2.79989200  | -1.42192600 | 4.38148000  |
| H | 5.97354500  | 0.96765700  | 2.63563100  |
| H | 4.73186900  | 0.15665500  | 4.66269900  |

|                |          |          |          |
|----------------|----------|----------|----------|
| Frequencies -- | 6.7918   | 12.6369  | 23.3416  |
| Frequencies -- | 30.2806  | 35.1283  | 38.6670  |
| Frequencies -- | 57.2872  | 64.2079  | 82.4024  |
| Frequencies -- | 84.9089  | 88.6938  | 97.8722  |
| Frequencies -- | 100.4286 | 109.9333 | 114.8033 |
| Frequencies -- | 121.6091 | 123.1846 | 130.9080 |
| Frequencies -- | 137.1116 | 137.6188 | 143.8850 |
| Frequencies -- | 151.0258 | 158.2479 | 164.8728 |
| Frequencies -- | 181.3001 | 192.4514 | 203.2392 |
| Frequencies -- | 213.2175 | 216.7175 | 234.6354 |
| Frequencies -- | 260.6815 | 264.3145 | 267.4944 |
| Frequencies -- | 284.2609 | 285.5482 | 288.8443 |
| Frequencies -- | 293.3880 | 296.3911 | 300.1294 |
| Frequencies -- | 304.7654 | 319.5935 | 339.4596 |
| Frequencies -- | 346.2697 | 354.9308 | 383.7782 |
| Frequencies -- | 384.7565 | 393.5197 | 406.3233 |
| Frequencies -- | 410.2746 | 428.5526 | 460.6583 |
| Frequencies -- | 472.3043 | 499.3769 | 512.5510 |

|                |           |           |           |
|----------------|-----------|-----------|-----------|
| Frequencies -- | 535.6112  | 539.5323  | 543.4679  |
| Frequencies -- | 551.0926  | 555.1801  | 562.9430  |
| Frequencies -- | 572.6038  | 584.0018  | 595.2484  |
| Frequencies -- | 603.0573  | 615.4278  | 615.7605  |
| Frequencies -- | 620.8519  | 633.0889  | 643.6057  |
| Frequencies -- | 683.6142  | 689.2415  | 710.4687  |
| Frequencies -- | 721.2809  | 728.3428  | 739.9190  |
| Frequencies -- | 743.5602  | 767.0842  | 778.3061  |
| Frequencies -- | 801.2019  | 804.9527  | 862.0179  |
| Frequencies -- | 875.7672  | 884.8950  | 915.5526  |
| Frequencies -- | 932.9970  | 957.9618  | 969.1046  |
| Frequencies -- | 970.9256  | 986.9213  | 989.2855  |
| Frequencies -- | 994.2604  | 999.0593  | 1004.5849 |
| Frequencies -- | 1035.9460 | 1037.5984 | 1042.4397 |
| Frequencies -- | 1045.0575 | 1046.3390 | 1047.7479 |
| Frequencies -- | 1048.8433 | 1050.8735 | 1061.7015 |
| Frequencies -- | 1086.6399 | 1088.2547 | 1089.1023 |
| Frequencies -- | 1123.6373 | 1125.0325 | 1173.2654 |
| Frequencies -- | 1177.6285 | 1181.0442 | 1182.9151 |
| Frequencies -- | 1184.1205 | 1189.2641 | 1204.3678 |
| Frequencies -- | 1234.6655 | 1265.2995 | 1287.0769 |
| Frequencies -- | 1300.6255 | 1330.0525 | 1353.9449 |
| Frequencies -- | 1354.8395 | 1369.3923 | 1395.2690 |
| Frequencies -- | 1409.9800 | 1412.5161 | 1421.7740 |
| Frequencies -- | 1424.5385 | 1426.8938 | 1427.6930 |
| Frequencies -- | 1432.3371 | 1433.3330 | 1436.2145 |
| Frequencies -- | 1437.9318 | 1449.6314 | 1451.3616 |
| Frequencies -- | 1454.2283 | 1457.8287 | 1463.3602 |
| Frequencies -- | 1478.3803 | 1479.5511 | 1491.3911 |
| Frequencies -- | 1492.7407 | 1498.4295 | 1499.2492 |
| Frequencies -- | 1504.2008 | 1505.3867 | 1507.7850 |
| Frequencies -- | 1509.9824 | 1514.6399 | 1520.5480 |
| Frequencies -- | 1579.8772 | 1588.8946 | 1595.9124 |
| Frequencies -- | 1599.6704 | 1611.8399 | 1625.0373 |
| Frequencies -- | 2987.1627 | 3005.1737 | 3005.8636 |
| Frequencies -- | 3006.5553 | 3007.8232 | 3009.7609 |
| Frequencies -- | 3095.5190 | 3098.9108 | 3099.9606 |
| Frequencies -- | 3101.0882 | 3103.9068 | 3112.9295 |
| Frequencies -- | 3139.2671 | 3142.2846 | 3142.6886 |
| Frequencies -- | 3147.5308 | 3150.1382 | 3151.8261 |
| Frequencies -- | 3158.8265 | 3161.5789 | 3163.7191 |
| Frequencies -- | 3171.7101 | 3173.4314 | 3180.6553 |
| Frequencies -- | 3192.9076 | 3193.5764 | 3237.7451 |

**Catalyst 22:**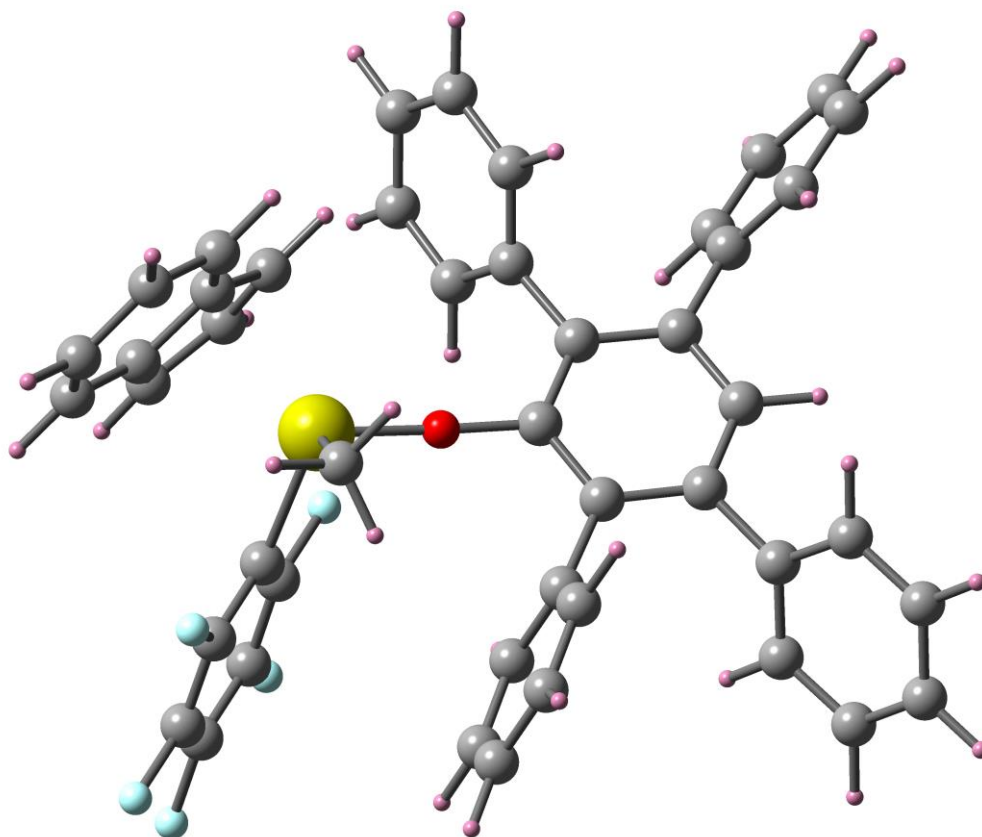

| <b>vacuum</b> | <b>toluene-like solvent</b> | <b>D3 dispersion</b> |
|---------------|-----------------------------|----------------------|
| -2403.2791116 | -2403.2921778               | -0.62468975          |

|    |             |             |             |
|----|-------------|-------------|-------------|
| Ti | -1.71471200 | -0.89991300 | -0.65300700 |
| C  | -1.91469900 | 0.03332000  | -2.49078200 |
| H  | -1.84507100 | 1.10456600  | -2.24307200 |
| H  | -1.07016800 | -0.24357500 | -3.14296600 |
| H  | -2.86645700 | -0.17887100 | -2.99353200 |
| O  | -0.04407700 | -0.37318100 | -0.27369900 |
| C  | 1.27619600  | 0.04224200  | -0.13924900 |
| C  | 2.28299400  | -0.92256100 | 0.18727300  |
| C  | 1.58833400  | 1.41674300  | -0.40085600 |
| C  | 3.64779700  | -0.50253000 | 0.17824600  |
| C  | 2.96041500  | 1.80860300  | -0.40109900 |
| C  | 3.95368100  | 0.83882400  | -0.14027900 |
| C  | -3.45006700 | -2.59185300 | 0.02729100  |
| C  | -3.71195900 | -2.60035600 | -1.39731000 |
| C  | -2.10749500 | -3.03158500 | 0.23364000  |
| C  | -2.47999000 | -2.99238100 | -2.06809500 |
| C  | -1.46524200 | -3.18576800 | -1.04657100 |
| C  | -2.88016200 | 0.18726800  | 0.83706000  |
| C  | -3.99072100 | 0.98897700  | 0.52470700  |
| C  | -2.53298400 | 0.17580000  | 2.19771600  |

|   |             |             |             |
|---|-------------|-------------|-------------|
| C | -4.70600800 | 1.74715700  | 1.47220100  |
| F | -4.44701400 | 1.05547200  | -0.80619000 |
| C | -3.20598200 | 0.90962300  | 3.19323800  |
| F | -1.44592600 | -0.61653100 | 2.62795900  |
| C | -4.30604200 | 1.70693000  | 2.82180300  |
| F | -5.79553500 | 2.53163700  | 1.10136300  |
| F | -2.80912200 | 0.86035400  | 4.52799900  |
| F | -4.99116300 | 2.44504400  | 3.77885100  |
| H | 4.99573300  | 1.15449500  | -0.11640900 |
| C | 4.80383600  | -1.40665900 | 0.52063000  |
| C | 4.94094800  | -1.99272900 | 1.80556600  |
| C | 5.83576800  | -1.62671900 | -0.42918000 |
| C | 6.06637700  | -2.77994300 | 2.12665300  |
| H | 4.17275400  | -1.82316200 | 2.56060800  |
| C | 6.95988900  | -2.41926600 | -0.11343000 |
| H | 5.75238800  | -1.18401800 | -1.42429300 |
| C | 7.07987400  | -3.00068800 | 1.16785500  |
| H | 6.15251300  | -3.21588900 | 3.12489000  |
| H | 7.73694800  | -2.58144200 | -0.86445700 |
| H | 7.95019500  | -3.61260600 | 1.41641800  |
| C | 3.42554600  | 3.22162500  | -0.64141000 |
| C | 3.08068700  | 4.28165500  | 0.23622600  |
| C | 4.29743700  | 3.50600800  | -1.72492300 |
| C | 3.58514300  | 5.58311700  | 0.03356500  |
| H | 2.42555700  | 4.08768800  | 1.08618200  |
| C | 4.79729000  | 4.80873500  | -1.93542900 |
| H | 4.57620900  | 2.70565600  | -2.41406700 |
| C | 4.44288100  | 5.85462600  | -1.05541400 |
| H | 3.30978100  | 6.38189800  | 0.72640800  |
| H | 5.45932300  | 5.00471600  | -2.78245500 |
| H | 4.83028900  | 6.86382100  | -1.21373600 |
| C | 1.94507700  | -2.35252200 | 0.51499000  |
| C | 1.32369800  | -2.69019200 | 1.74426700  |
| C | 2.33030000  | -3.40479800 | -0.35489600 |
| C | 1.11204900  | -4.03894100 | 2.10170100  |
| H | 1.02291600  | -1.89792900 | 2.43111900  |
| C | 2.11021700  | -4.75404200 | -0.00596600 |
| H | 2.81905200  | -3.16656000 | -1.30144900 |
| C | 1.50427100  | -5.07720200 | 1.22824700  |
| H | 0.64835800  | -4.27612300 | 3.06232500  |
| H | 2.42262800  | -5.54827600 | -0.68816400 |
| H | 1.34425400  | -6.12124800 | 1.50662700  |
| C | 0.51649900  | 2.43313100  | -0.69163600 |
| C | -0.35305100 | 2.88673300  | 0.33176000  |
| C | 0.40200800  | 3.01818300  | -1.97826100 |
| C | -1.30211500 | 3.90013000  | 0.08101600  |
| H | -0.27220900 | 2.46068600  | 1.33331800  |
| C | -0.55180200 | 4.02442700  | -2.23599700 |
| H | 1.06252100  | 2.68523500  | -2.78074700 |
| C | -1.40669000 | 4.47284500  | -1.20517600 |
| H | -1.95356000 | 4.24456000  | 0.88761000  |
| H | -0.62417500 | 4.45822400  | -3.23601200 |
| H | -2.14228100 | 5.25617200  | -1.40076200 |
| H | -4.17664800 | -2.37884800 | 0.80375500  |
| H | -1.62989500 | -3.17506000 | 1.19565100  |
| H | -0.46438000 | -3.56685600 | -1.20996900 |
| C | -4.88670500 | -2.32926700 | -2.15932000 |

|                |             |             |             |
|----------------|-------------|-------------|-------------|
| H              | -5.80989500 | -2.01990000 | -1.66596300 |
| C              | -4.83719500 | -2.48882900 | -3.54753300 |
| H              | -5.73079800 | -2.30366900 | -4.14785600 |
| C              | -3.63031800 | -2.90218900 | -4.20626700 |
| H              | -3.63780400 | -3.03113100 | -5.29109600 |
| C              | -2.45670300 | -3.14365300 | -3.48596600 |
| H              | -1.54265300 | -3.45496800 | -3.99562400 |
|                |             |             |             |
| Frequencies -- | 10.9084     | 14.5685     | 21.5423     |
| Frequencies -- | 23.3954     | 27.3023     | 28.7931     |
| Frequencies -- | 40.5537     | 41.4531     | 44.3169     |
| Frequencies -- | 47.9927     | 53.6028     | 60.6359     |
| Frequencies -- | 61.2328     | 64.9111     | 69.5331     |
| Frequencies -- | 70.4244     | 77.1748     | 84.0115     |
| Frequencies -- | 94.4961     | 110.2043    | 115.2728    |
| Frequencies -- | 119.5098    | 120.5796    | 126.6192    |
| Frequencies -- | 143.3355    | 147.0440    | 155.7780    |
| Frequencies -- | 176.8977    | 193.6434    | 204.6288    |
| Frequencies -- | 205.7972    | 210.1500    | 211.4919    |
| Frequencies -- | 227.9255    | 236.4501    | 245.7242    |
| Frequencies -- | 251.4403    | 255.4229    | 262.6743    |
| Frequencies -- | 264.1813    | 266.9499    | 282.9848    |
| Frequencies -- | 288.3387    | 294.7581    | 318.5353    |
| Frequencies -- | 328.8076    | 330.5137    | 342.7013    |
| Frequencies -- | 369.3767    | 384.9690    | 394.2514    |
| Frequencies -- | 400.2698    | 403.8796    | 406.2780    |
| Frequencies -- | 406.6931    | 408.1428    | 409.2694    |
| Frequencies -- | 427.4125    | 437.7811    | 439.3511    |
| Frequencies -- | 462.3127    | 490.7614    | 518.1807    |
| Frequencies -- | 524.6950    | 528.5784    | 540.8935    |
| Frequencies -- | 543.1853    | 543.6176    | 547.4189    |
| Frequencies -- | 549.9643    | 566.7309    | 573.0907    |
| Frequencies -- | 597.2879    | 601.6450    | 614.0095    |
| Frequencies -- | 616.2534    | 617.5121    | 619.3745    |
| Frequencies -- | 624.1324    | 633.6567    | 633.9805    |
| Frequencies -- | 640.1643    | 656.0343    | 677.1155    |
| Frequencies -- | 689.8992    | 690.5102    | 695.5228    |
| Frequencies -- | 709.7505    | 709.8691    | 710.3503    |
| Frequencies -- | 713.7558    | 727.7318    | 732.6502    |
| Frequencies -- | 737.0647    | 741.8023    | 743.7004    |
| Frequencies -- | 745.7934    | 764.6386    | 766.5268    |
| Frequencies -- | 771.6884    | 783.1894    | 797.2832    |
| Frequencies -- | 805.2387    | 810.9951    | 827.4168    |
| Frequencies -- | 858.5782    | 858.9618    | 859.9316    |
| Frequencies -- | 863.9772    | 866.5838    | 868.6500    |
| Frequencies -- | 874.6970    | 885.5242    | 887.9548    |
| Frequencies -- | 892.0354    | 909.2513    | 932.9087    |
| Frequencies -- | 934.1104    | 936.6432    | 941.1761    |
| Frequencies -- | 964.3081    | 969.6905    | 985.0864    |
| Frequencies -- | 985.9969    | 989.2758    | 992.3252    |
| Frequencies -- | 994.3880    | 995.9364    | 999.1471    |
| Frequencies -- | 1003.5286   | 1004.4810   | 1006.2413   |
| Frequencies -- | 1007.4331   | 1012.2426   | 1012.9687   |
| Frequencies -- | 1019.9550   | 1027.3290   | 1039.0213   |
| Frequencies -- | 1039.7760   | 1045.5505   | 1050.5044   |
| Frequencies -- | 1053.3689   | 1054.4441   | 1062.7097   |
| Frequencies -- | 1073.7548   | 1089.5957   | 1090.4072   |
| Frequencies -- | 1091.0098   | 1091.4715   | 1128.7018   |
| Frequencies -- | 1134.2476   | 1138.7807   | 1179.2581   |
| Frequencies -- | 1182.1627   | 1182.4158   | 1182.5698   |
| Frequencies -- | 1183.3096   | 1184.3468   | 1191.0723   |
| Frequencies -- | 1204.2772   | 1205.5645   | 1207.0183   |

|                |           |           |           |
|----------------|-----------|-----------|-----------|
| Frequencies -- | 1207.6643 | 1213.8899 | 1231.0844 |
| Frequencies -- | 1242.5135 | 1268.3413 | 1270.8011 |
| Frequencies -- | 1280.7155 | 1293.9388 | 1304.3437 |
| Frequencies -- | 1324.2805 | 1328.8623 | 1332.1941 |
| Frequencies -- | 1333.2329 | 1334.9834 | 1357.1673 |
| Frequencies -- | 1362.7259 | 1366.6544 | 1368.0887 |
| Frequencies -- | 1369.6798 | 1370.7324 | 1373.4764 |
| Frequencies -- | 1380.7344 | 1402.9115 | 1421.4862 |
| Frequencies -- | 1422.4779 | 1425.4416 | 1431.6719 |
| Frequencies -- | 1440.8469 | 1443.3894 | 1445.6049 |
| Frequencies -- | 1447.0579 | 1452.2953 | 1456.3755 |
| Frequencies -- | 1467.9584 | 1497.0912 | 1497.8048 |
| Frequencies -- | 1498.6338 | 1502.5655 | 1509.2998 |
| Frequencies -- | 1529.8099 | 1562.4405 | 1589.4167 |
| Frequencies -- | 1590.4836 | 1595.0575 | 1595.8808 |
| Frequencies -- | 1597.4412 | 1599.9483 | 1600.3412 |
| Frequencies -- | 1623.2245 | 1623.7422 | 1624.1803 |
| Frequencies -- | 1624.5856 | 1629.3008 | 3002.8655 |
| Frequencies -- | 3120.9643 | 3150.8607 | 3151.4843 |
| Frequencies -- | 3153.4688 | 3155.3695 | 3158.0324 |
| Frequencies -- | 3158.6390 | 3159.3257 | 3160.3914 |
| Frequencies -- | 3160.6930 | 3161.8294 | 3167.4637 |
| Frequencies -- | 3171.5679 | 3172.3077 | 3175.8872 |
| Frequencies -- | 3176.4341 | 3180.6494 | 3183.1550 |
| Frequencies -- | 3184.5311 | 3185.4043 | 3185.9506 |
| Frequencies -- | 3193.4139 | 3193.9160 | 3195.8374 |
| Frequencies -- | 3196.5301 | 3196.5661 | 3198.0539 |
| Frequencies -- | 3255.9023 | 3271.4640 | 3290.9516 |

**Catalyst 23:**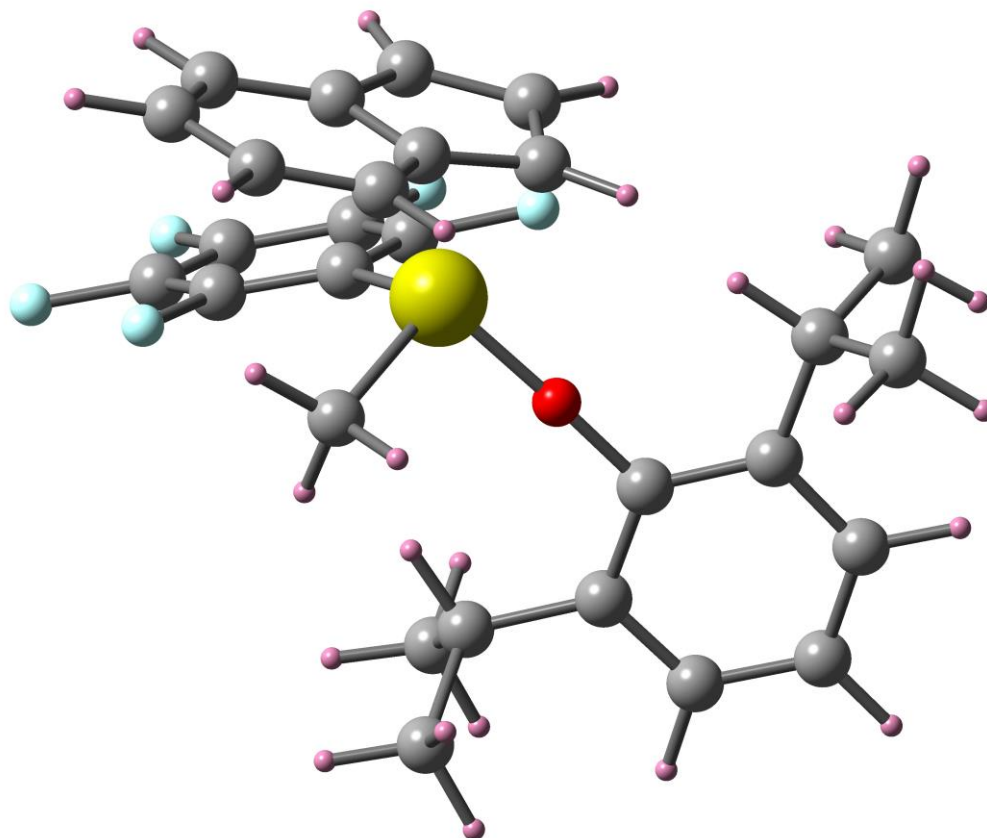

| <b>vacuum</b> | <b>toluene-like solvent</b> | <b>D3 dispersion</b> |
|---------------|-----------------------------|----------------------|
| -1715.2443804 | -1715.2514622               | -0.40771625          |

|    |             |             |             |
|----|-------------|-------------|-------------|
| Ti | -0.31427900 | 1.03305300  | 0.17326100  |
| C  | -0.63228100 | 1.51505100  | 2.16931700  |
| H  | -0.55184900 | 0.55844100  | 2.71298800  |
| H  | 0.16842100  | 2.19200500  | 2.51216500  |
| H  | -1.61463200 | 1.96612800  | 2.35997000  |
| O  | 1.33732500  | 0.38888800  | 0.30645400  |
| C  | 2.60620700  | -0.18465600 | 0.42702000  |
| C  | 3.67358200  | 0.29991200  | -0.39226400 |
| C  | 2.79557000  | -1.23919100 | 1.37658300  |
| C  | 4.94985100  | -0.28545000 | -0.22104200 |
| C  | 4.09636600  | -1.78210200 | 1.49845900  |
| C  | 5.16679200  | -1.31257500 | 0.71547300  |
| H  | 5.78311100  | 0.06609000  | -0.83084300 |
| H  | 4.27216600  | -2.58513300 | 2.21525600  |
| C  | -1.82791500 | 1.79079900  | -1.65626400 |
| C  | -2.30869000 | 2.66986100  | -0.60880300 |
| C  | -0.45842200 | 2.11077600  | -1.90841700 |
| C  | -1.18975000 | 3.49640900  | -0.17809000 |
| C  | -0.02291800 | 3.08484800  | -0.94055500 |
| C  | -1.36152400 | -0.81297100 | -0.31929400 |



|                |             |             |             |
|----------------|-------------|-------------|-------------|
| C              | -2.44917800 | -1.30750400 | 0.41991400  |
| C              | -0.94684200 | -1.63981800 | -1.37748300 |
| C              | -3.08494500 | -2.53764500 | 0.15792300  |
| F              | -2.96466400 | -0.54731900 | 1.48929700  |
| C              | -1.53881300 | -2.87850300 | -1.68965400 |
| F              | 0.11642800  | -1.22128100 | -2.20485100 |
| C              | -2.62065400 | -3.33112200 | -0.90838600 |
| F              | -4.15784500 | -2.97795600 | 0.92807200  |
| F              | -1.08259300 | -3.65626700 | -2.75034300 |
| F              | -3.22586600 | -4.54833400 | -1.19066100 |
| C              | 3.47289300  | 1.40455400  | -1.43886600 |
| H              | 2.42595500  | 1.72028300  | -1.39195400 |
| C              | 1.65456800  | -1.79355300 | 2.24304800  |
| H              | 0.73223200  | -1.27232200 | 1.96341000  |
| H              | 6.16156800  | -1.74777600 | 0.83083000  |
| C              | 4.34203000  | 2.66014800  | -1.13768800 |
| H              | 4.13728800  | 3.05167500  | -0.12840700 |
| H              | 5.41840400  | 2.43814800  | -1.19732500 |
| H              | 4.12661800  | 3.45795900  | -1.86747800 |
| C              | 3.72083600  | 0.87638400  | -2.88261900 |
| H              | 3.07204400  | 0.01464900  | -3.10319600 |
| H              | 3.50630400  | 1.66679000  | -3.62078400 |
| H              | 4.76450800  | 0.55834400  | -3.02823500 |
| C              | 1.40991400  | -3.30839000 | 1.98036500  |
| H              | 0.52752900  | -3.65215900 | 2.54416500  |
| H              | 1.23020300  | -3.50191500 | 0.91168500  |
| H              | 2.26632100  | -3.92473800 | 2.29362100  |
| C              | 1.89408300  | -1.51800600 | 3.75646800  |
| H              | 2.02703200  | -0.44202100 | 3.94794900  |
| H              | 1.03191900  | -1.86671700 | 4.34778600  |
| H              | 2.78926000  | -2.03963000 | 4.12898800  |
| H              | -2.42929700 | 1.08434600  | -2.21733600 |
| H              | 0.16219800  | 1.64873700  | -2.67005500 |
| H              | 0.95010300  | 3.56521300  | -0.90749300 |
| C              | -3.59275400 | 2.83708300  | -0.01032400 |
| H              | -4.43342600 | 2.21093300  | -0.31481300 |
| C              | -3.75810800 | 3.83604100  | 0.95416900  |
| H              | -4.73799100 | 3.99302900  | 1.41041300  |
| C              | -2.66212800 | 4.67189700  | 1.35519100  |
| H              | -2.83747100 | 5.45190400  | 2.09962200  |
| C              | -1.38541500 | 4.50564500  | 0.81028300  |
| H              | -0.55625700 | 5.14235400  | 1.12526800  |
| Frequencies -- | 14.6791     | 21.6142     | 25.5083     |
| Frequencies -- | 27.6912     | 35.7868     | 47.0029     |
| Frequencies -- | 49.6468     | 53.8242     | 67.1336     |
| Frequencies -- | 80.6505     | 83.8116     | 91.0726     |
| Frequencies -- | 113.5905    | 121.3183    | 125.1827    |
| Frequencies -- | 125.9021    | 130.1430    | 151.2049    |
| Frequencies -- | 155.9492    | 164.1660    | 181.4042    |
| Frequencies -- | 205.2753    | 211.5373    | 221.0718    |
| Frequencies -- | 223.9551    | 232.5441    | 238.3412    |
| Frequencies -- | 239.4918    | 243.9257    | 254.9124    |
| Frequencies -- | 264.6189    | 265.4535    | 272.3874    |
| Frequencies -- | 283.4890    | 290.4398    | 295.4508    |
| Frequencies -- | 305.6943    | 312.9761    | 321.6472    |
| Frequencies -- | 336.8727    | 342.6551    | 377.0981    |
| Frequencies -- | 385.9688    | 394.7267    | 420.3642    |

|                |           |           |           |
|----------------|-----------|-----------|-----------|
| Frequencies -- | 426.9466  | 430.6504  | 434.4620  |
| Frequencies -- | 438.9784  | 462.6644  | 524.0392  |
| Frequencies -- | 538.3923  | 542.5777  | 543.1189  |
| Frequencies -- | 544.2287  | 549.9568  | 562.5184  |
| Frequencies -- | 571.5160  | 596.7078  | 601.3564  |
| Frequencies -- | 602.0077  | 609.5156  | 628.4909  |
| Frequencies -- | 635.5253  | 669.2862  | 691.7915  |
| Frequencies -- | 725.6362  | 729.4469  | 737.2510  |
| Frequencies -- | 739.4947  | 742.7634  | 762.3025  |
| Frequencies -- | 767.1057  | 796.4676  | 798.4614  |
| Frequencies -- | 815.1972  | 816.0674  | 867.4342  |
| Frequencies -- | 873.3357  | 878.2138  | 878.9587  |
| Frequencies -- | 887.2397  | 891.8551  | 920.1867  |
| Frequencies -- | 930.9666  | 931.6583  | 938.4008  |
| Frequencies -- | 941.2294  | 960.9607  | 963.4059  |
| Frequencies -- | 970.9768  | 986.5819  | 995.8865  |
| Frequencies -- | 1000.9118 | 1012.9842 | 1042.0252 |
| Frequencies -- | 1055.1295 | 1059.7091 | 1070.8589 |
| Frequencies -- | 1076.4805 | 1117.7255 | 1119.4649 |
| Frequencies -- | 1120.3436 | 1139.2403 | 1166.0807 |
| Frequencies -- | 1178.9009 | 1179.8505 | 1184.4412 |
| Frequencies -- | 1193.3861 | 1198.9382 | 1203.8671 |
| Frequencies -- | 1211.7068 | 1241.5254 | 1260.6947 |
| Frequencies -- | 1268.8074 | 1277.9889 | 1294.0214 |
| Frequencies -- | 1307.5706 | 1333.2959 | 1334.5201 |
| Frequencies -- | 1338.2330 | 1356.4895 | 1362.0529 |
| Frequencies -- | 1372.1978 | 1384.6223 | 1398.1727 |
| Frequencies -- | 1398.7114 | 1404.3881 | 1416.3427 |
| Frequencies -- | 1418.1868 | 1419.4375 | 1420.6598 |
| Frequencies -- | 1424.8088 | 1430.8701 | 1441.9701 |
| Frequencies -- | 1453.2660 | 1467.3510 | 1475.2295 |
| Frequencies -- | 1487.5502 | 1487.9679 | 1489.4049 |
| Frequencies -- | 1490.0460 | 1498.1481 | 1499.3992 |
| Frequencies -- | 1500.9638 | 1506.8789 | 1507.8473 |
| Frequencies -- | 1562.1895 | 1590.4991 | 1599.0184 |
| Frequencies -- | 1600.8364 | 1607.9286 | 1629.4576 |
| Frequencies -- | 2994.8235 | 3003.5915 | 3006.4242 |
| Frequencies -- | 3007.8947 | 3011.3565 | 3098.1339 |
| Frequencies -- | 3101.7392 | 3104.8204 | 3106.1759 |
| Frequencies -- | 3108.2645 | 3110.6367 | 3115.2690 |
| Frequencies -- | 3116.0146 | 3116.3309 | 3133.7732 |
| Frequencies -- | 3143.6716 | 3154.3669 | 3159.8341 |
| Frequencies -- | 3161.7671 | 3168.7580 | 3180.3833 |
| Frequencies -- | 3181.6469 | 3195.4566 | 3195.5818 |
| Frequencies -- | 3242.6363 | 3254.5154 | 3272.5971 |

**Catalyst 24:**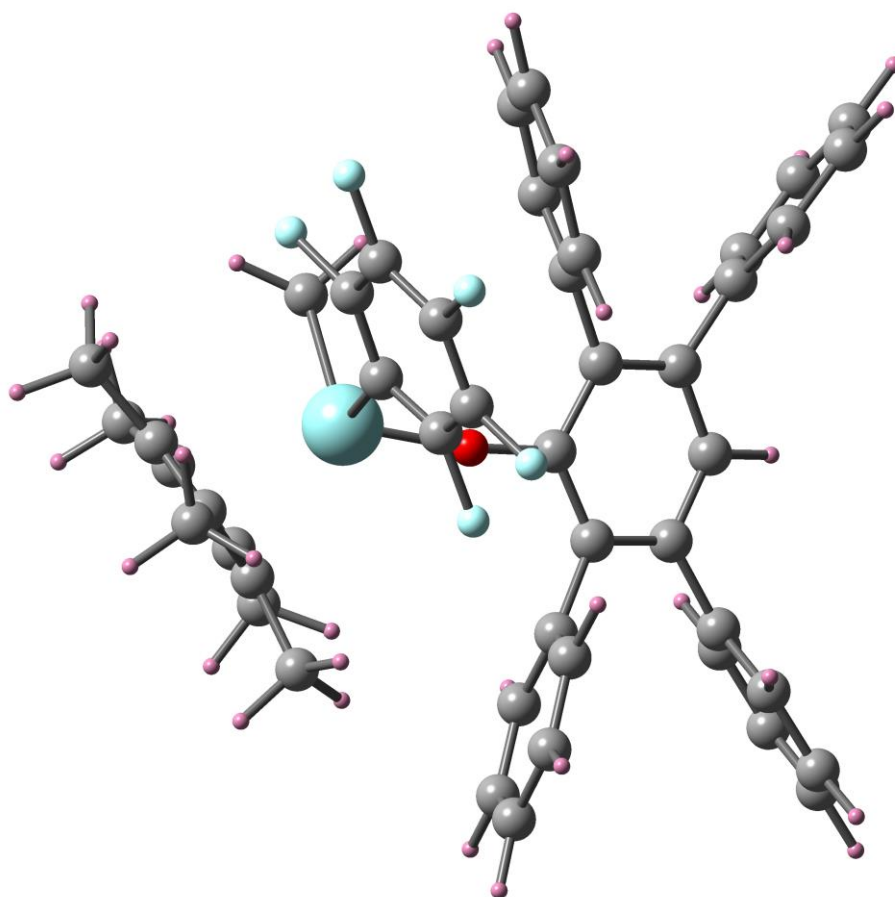

| <b>vacuum</b> | <b>toluene-like solvent</b> | <b>D3 dispersion</b> |
|---------------|-----------------------------|----------------------|
| -2434.6573094 | -2434.6678064               | -0.65768109          |

|    |             |             |             |
|----|-------------|-------------|-------------|
| Zr | -1.71645000 | -0.49995800 | -1.02544600 |
| C  | -1.71579600 | 1.02641900  | -2.65560200 |
| H  | -1.48814000 | 1.98175400  | -2.15525600 |
| H  | -0.91244900 | 0.82893300  | -3.38849600 |
| H  | -2.66671900 | 1.13342900  | -3.19737600 |
| O  | 0.15126800  | -0.23528800 | -0.39734800 |
| C  | 1.48126200  | 0.09826200  | -0.15801700 |
| C  | 2.42789100  | -0.92878400 | 0.17172200  |
| C  | 1.88161600  | 1.47245200  | -0.29197900 |
| C  | 3.81607300  | -0.58775100 | 0.20154600  |
| C  | 3.27392700  | 1.78442200  | -0.24718700 |
| C  | 4.20814800  | 0.74338100  | -0.05569700 |
| H  | 5.26673400  | 0.99421900  | -0.00572900 |
| C  | -2.40378800 | -2.94328100 | -0.99484900 |
| C  | -3.68128500 | -2.26093900 | -0.99653600 |
| C  | -1.76162200 | -2.68872400 | -2.27019000 |
| C  | -3.83285700 | -1.59728500 | -2.26929900 |
| C  | -2.65734100 | -1.86472000 | -3.06105700 |
| C  | -2.95382600 | 0.35885800  | 0.77555000  |
| C  | -3.91138400 | 1.37928100  | 0.65670200  |

|   |             |             |             |
|---|-------------|-------------|-------------|
| C | -2.72821000 | -0.06739100 | 2.09357000  |
| C | -4.59381000 | 1.95873800  | 1.74398200  |
| F | -4.23101100 | 1.87815400  | -0.62453500 |
| C | -3.37166900 | 0.46503800  | 3.22682600  |
| F | -1.79674100 | -1.10624300 | 2.32616400  |
| C | -4.31689200 | 1.49363900  | 3.04472000  |
| F | -5.52907500 | 2.97455900  | 1.56142600  |
| F | -3.09821900 | -0.00223900 | 4.51063600  |
| F | -4.97234500 | 2.04306100  | 4.13895400  |
| C | -1.95693700 | -3.95093400 | 0.04137800  |
| H | -2.50593400 | -4.89784300 | -0.10932200 |
| H | -0.88956800 | -4.17485000 | -0.03388400 |
| H | -2.15564700 | -3.62060100 | 1.06939700  |
| C | -4.76451200 | -2.43137700 | 0.04761500  |
| H | -5.39308400 | -3.30336800 | -0.20646100 |
| H | -4.35130500 | -2.61045300 | 1.04857200  |
| H | -5.42920700 | -1.55967600 | 0.10886700  |
| C | -0.49486500 | -3.34928800 | -2.77976400 |
| H | 0.30605600  | -3.36200800 | -2.03191100 |
| H | -0.70064600 | -4.39699100 | -3.06105600 |
| H | -0.10503100 | -2.84425100 | -3.67416000 |
| C | -5.06992700 | -0.86492600 | -2.74236800 |
| H | -5.75194000 | -1.56504500 | -3.25688300 |
| H | -5.63094800 | -0.41456200 | -1.91325000 |
| H | -4.83427800 | -0.06206900 | -3.45377600 |
| C | -2.48804000 | -1.54774800 | -4.53074100 |
| H | -1.43777200 | -1.38516300 | -4.80891500 |
| H | -2.86090100 | -2.39131500 | -5.13824700 |
| H | -3.05022800 | -0.65528400 | -4.83281200 |
| C | 4.92069900  | -1.55577800 | 0.54706300  |
| C | 5.04021300  | -2.12234000 | 1.84244300  |
| C | 5.93168400  | -1.84596700 | -0.40597500 |
| C | 6.12783700  | -2.95851100 | 2.17051400  |
| H | 4.28633500  | -1.90105200 | 2.59881900  |
| C | 7.01803200  | -2.68754900 | -0.08336500 |
| H | 5.86254000  | -1.41615500 | -1.40785200 |
| C | 7.12069200  | -3.24867400 | 1.20842500  |
| H | 6.20090700  | -3.37874500 | 3.17661200  |
| H | 7.78003100  | -2.90194400 | -0.83687400 |
| H | 7.96224200  | -3.89751000 | 1.46273800  |
| C | 3.83108800  | 3.18224300  | -0.34463900 |
| C | 3.55186900  | 4.16772200  | 0.63732800  |
| C | 4.73232700  | 3.51565200  | -1.38950800 |
| C | 4.14633000  | 5.44519100  | 0.57203400  |
| H | 2.87488800  | 3.93260600  | 1.45941900  |
| C | 5.32315600  | 4.79542400  | -1.46240000 |
| H | 4.96391500  | 2.77172700  | -2.15516600 |
| C | 5.03228600  | 5.76731500  | -0.48022100 |
| H | 3.91916900  | 6.18588500  | 1.34267500  |
| H | 6.00690400  | 5.03076000  | -2.28179200 |
| H | 5.49008800  | 6.75807200  | -0.53169200 |
| C | 2.01600800  | -2.32486000 | 0.55855600  |
| C | 1.30735000  | -2.54038900 | 1.77006600  |
| C | 2.45443900  | -3.46130900 | -0.16876900 |
| C | 1.08215300  | -3.84439900 | 2.25768600  |
| H | 0.95581500  | -1.68484500 | 2.34767100  |
| C | 2.21933400  | -4.76806700 | 0.30891900  |

|   |             |             |             |
|---|-------------|-------------|-------------|
| H | 3.00601300  | -3.32215600 | -1.09997000 |
| C | 1.54385300  | -4.96577800 | 1.53316200  |
| H | 0.55106500  | -3.98183600 | 3.20250200  |
| H | 2.57975100  | -5.62601900 | -0.26390700 |
| H | 1.37964500  | -5.97590500 | 1.91586300  |
| C | 0.87832300  | 2.58461500  | -0.43569100 |
| C | -0.02373400 | 2.87489200  | 0.62120500  |
| C | 0.87343100  | 3.43618100  | -1.56983400 |
| C | -0.89298800 | 3.98393700  | 0.55176600  |
| H | -0.02588300 | 2.24484500  | 1.51264600  |
| C | 0.00296000  | 4.54280800  | -1.64570800 |
| H | 1.55606400  | 3.23363300  | -2.39631700 |
| C | -0.88312300 | 4.82457100  | -0.58288200 |
| H | -1.56996700 | 4.19573900  | 1.38297600  |
| H | 0.01889300  | 5.18353600  | -2.53044400 |
| H | -1.55527400 | 5.68386500  | -0.63741600 |

|                |          |          |          |
|----------------|----------|----------|----------|
| Frequencies -- | 11.1885  | 14.1039  | 15.7831  |
| Frequencies -- | 21.4433  | 24.9325  | 26.9417  |
| Frequencies -- | 41.2025  | 43.0627  | 44.6337  |
| Frequencies -- | 46.4180  | 50.6254  | 56.0059  |
| Frequencies -- | 59.8373  | 64.0161  | 69.4083  |
| Frequencies -- | 78.2887  | 81.3500  | 84.5147  |
| Frequencies -- | 86.9870  | 93.2122  | 98.6649  |
| Frequencies -- | 108.4486 | 114.4799 | 116.1500 |
| Frequencies -- | 116.8753 | 121.9829 | 132.4080 |
| Frequencies -- | 137.0301 | 140.2747 | 152.6136 |
| Frequencies -- | 154.5887 | 162.9585 | 164.4142 |
| Frequencies -- | 172.9646 | 176.5214 | 180.7509 |
| Frequencies -- | 192.6243 | 195.8928 | 205.3271 |
| Frequencies -- | 212.8039 | 214.5163 | 216.0539 |
| Frequencies -- | 228.2214 | 241.6363 | 249.8972 |
| Frequencies -- | 255.9186 | 258.7232 | 263.7105 |
| Frequencies -- | 264.9633 | 280.2797 | 288.4698 |
| Frequencies -- | 291.1572 | 296.5195 | 303.7087 |
| Frequencies -- | 317.2673 | 321.6159 | 328.2690 |
| Frequencies -- | 333.4267 | 346.3095 | 379.0180 |
| Frequencies -- | 385.7737 | 387.7846 | 398.5542 |
| Frequencies -- | 403.1372 | 406.4236 | 407.2902 |
| Frequencies -- | 410.2565 | 410.7156 | 426.9315 |
| Frequencies -- | 433.6569 | 460.5653 | 481.9924 |
| Frequencies -- | 492.4759 | 519.4428 | 529.4036 |
| Frequencies -- | 540.3489 | 540.6832 | 541.8977 |
| Frequencies -- | 542.6725 | 544.8825 | 548.6037 |
| Frequencies -- | 553.3856 | 584.6892 | 585.1800 |
| Frequencies -- | 592.7273 | 614.5305 | 615.6079 |
| Frequencies -- | 616.5260 | 618.1892 | 619.9353 |
| Frequencies -- | 624.1296 | 630.2647 | 633.0531 |
| Frequencies -- | 640.5418 | 653.7473 | 656.9448 |
| Frequencies -- | 686.4628 | 688.6448 | 693.4979 |
| Frequencies -- | 701.1955 | 710.3821 | 710.9172 |
| Frequencies -- | 711.2184 | 713.2841 | 715.6442 |
| Frequencies -- | 724.2036 | 747.1080 | 764.2153 |
| Frequencies -- | 770.7453 | 783.8848 | 795.8071 |
| Frequencies -- | 799.8522 | 802.3586 | 804.9128 |
| Frequencies -- | 858.1082 | 860.7306 | 861.5538 |
| Frequencies -- | 865.0688 | 865.6377 | 881.9268 |
| Frequencies -- | 904.9288 | 931.3755 | 934.3220 |
| Frequencies -- | 937.0915 | 938.8729 | 950.8477 |
| Frequencies -- | 965.7183 | 973.7910 | 986.6526 |
| Frequencies -- | 987.3159 | 990.1400 | 990.8507 |

|                |           |           |           |
|----------------|-----------|-----------|-----------|
| Frequencies -- | 992.4327  | 996.6323  | 1003.2432 |
| Frequencies -- | 1004.0258 | 1005.6308 | 1005.9642 |
| Frequencies -- | 1014.3050 | 1020.7838 | 1023.8528 |
| Frequencies -- | 1036.4498 | 1043.6995 | 1044.2763 |
| Frequencies -- | 1046.0732 | 1046.6733 | 1048.1723 |
| Frequencies -- | 1048.8637 | 1050.8383 | 1051.3366 |
| Frequencies -- | 1054.6094 | 1055.5657 | 1085.1917 |
| Frequencies -- | 1086.7565 | 1088.4051 | 1089.6558 |
| Frequencies -- | 1089.8622 | 1090.3613 | 1123.2845 |
| Frequencies -- | 1128.8280 | 1129.6177 | 1172.2808 |
| Frequencies -- | 1176.2464 | 1181.2812 | 1181.6059 |
| Frequencies -- | 1181.7216 | 1182.2851 | 1189.3509 |
| Frequencies -- | 1192.5534 | 1203.3822 | 1204.8236 |
| Frequencies -- | 1206.1062 | 1207.3595 | 1227.4064 |
| Frequencies -- | 1273.0671 | 1278.9531 | 1288.5607 |
| Frequencies -- | 1301.4929 | 1322.5350 | 1326.8165 |
| Frequencies -- | 1331.1832 | 1332.3760 | 1334.6354 |
| Frequencies -- | 1357.6563 | 1365.2289 | 1367.6656 |
| Frequencies -- | 1369.9073 | 1370.4587 | 1381.5785 |
| Frequencies -- | 1398.5771 | 1413.1728 | 1415.0435 |
| Frequencies -- | 1423.2658 | 1424.6049 | 1426.6209 |
| Frequencies -- | 1429.9905 | 1432.4689 | 1438.6365 |
| Frequencies -- | 1441.7088 | 1442.3508 | 1443.4526 |
| Frequencies -- | 1444.6481 | 1446.5216 | 1447.5993 |
| Frequencies -- | 1452.0796 | 1453.7098 | 1458.9654 |
| Frequencies -- | 1463.5090 | 1486.7841 | 1492.7727 |
| Frequencies -- | 1496.3022 | 1496.5881 | 1497.1822 |
| Frequencies -- | 1501.3308 | 1501.3994 | 1502.0706 |
| Frequencies -- | 1506.6080 | 1508.7619 | 1510.4761 |
| Frequencies -- | 1514.3801 | 1515.8763 | 1518.3947 |
| Frequencies -- | 1528.7519 | 1587.2876 | 1589.1994 |
| Frequencies -- | 1593.1792 | 1595.1672 | 1596.8566 |
| Frequencies -- | 1599.2836 | 1600.5148 | 1621.5518 |
| Frequencies -- | 1623.0292 | 1623.3370 | 1623.9125 |
| Frequencies -- | 2990.0998 | 3006.6981 | 3006.7594 |
| Frequencies -- | 3007.2578 | 3008.0470 | 3009.5480 |
| Frequencies -- | 3098.2809 | 3100.8107 | 3102.1772 |
| Frequencies -- | 3102.9891 | 3104.7103 | 3110.4487 |
| Frequencies -- | 3132.9445 | 3141.2272 | 3145.5642 |
| Frequencies -- | 3148.1210 | 3149.8669 | 3149.9089 |
| Frequencies -- | 3150.6568 | 3151.3889 | 3153.3030 |
| Frequencies -- | 3157.9011 | 3158.1629 | 3160.9931 |
| Frequencies -- | 3161.1944 | 3170.9510 | 3171.1234 |
| Frequencies -- | 3175.7160 | 3175.8413 | 3182.8851 |
| Frequencies -- | 3183.3880 | 3183.7126 | 3185.2768 |
| Frequencies -- | 3186.0775 | 3192.3307 | 3194.4785 |
| Frequencies -- | 3195.4696 | 3195.8086 | 3197.7848 |

**Catalyst 30:**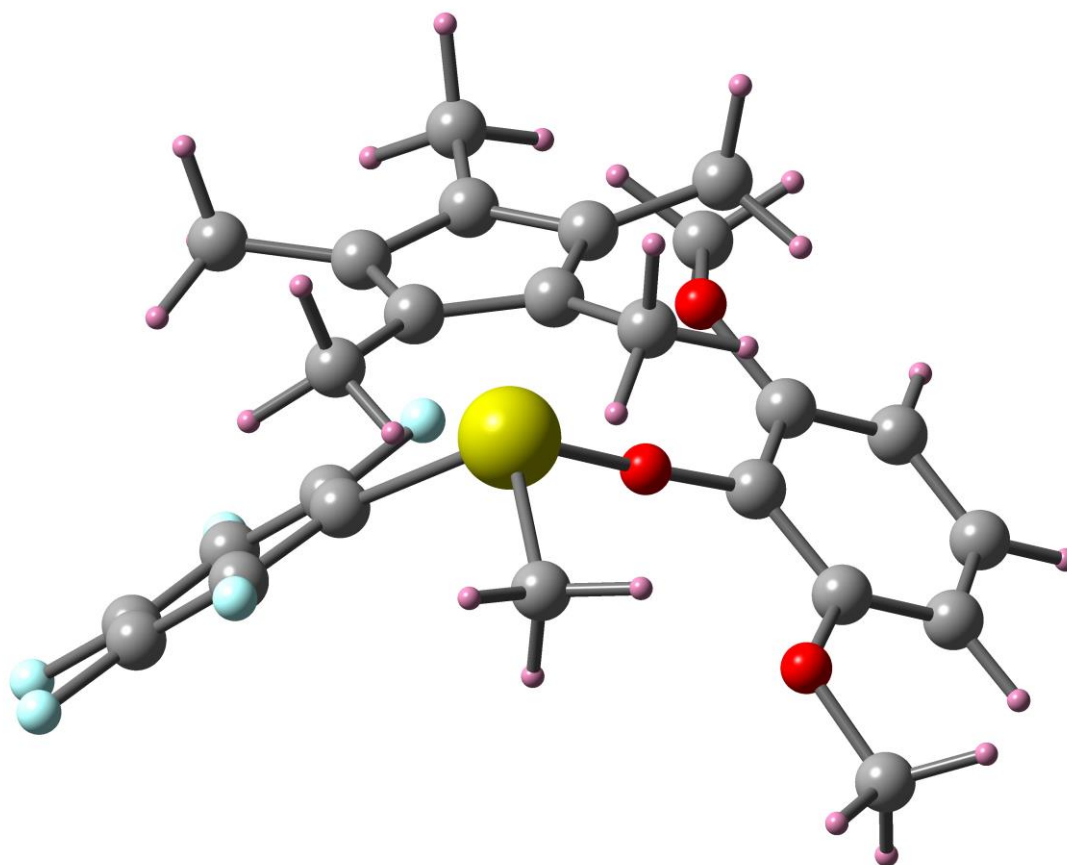

| <b>vacuum</b> | <b>toluene-like solvent</b> | <b>D3 dispersion</b> |
|---------------|-----------------------------|----------------------|
| -1751.3415946 | -1751.3476426               | -0.38032526          |

|    |             |             |             |
|----|-------------|-------------|-------------|
| Ti | 0.00069700  | 0.96066100  | 0.21464500  |
| C  | 0.02776400  | 1.60271100  | 2.19790500  |
| H  | -0.08965300 | 0.64195900  | 2.73302300  |
| H  | 1.00832800  | 2.02235700  | 2.46424900  |
| H  | -0.78017700 | 2.29112400  | 2.47564100  |
| O  | 1.44452800  | -0.10952100 | 0.28601800  |
| C  | 2.60750600  | -0.82806700 | 0.34337800  |
| C  | 3.10534100  | -1.53294500 | -0.79629500 |
| C  | 3.33389300  | -0.91397000 | 1.57450200  |
| C  | 4.27709100  | -2.32137300 | -0.69411200 |
| C  | 4.50671000  | -1.70026900 | 1.66274200  |
| C  | 4.96469000  | -2.40067200 | 0.53047700  |
| H  | 4.65543800  | -2.86284200 | -1.55870700 |
| H  | 5.05792300  | -1.77300100 | 2.59785900  |
| C  | -1.37156600 | 2.29505900  | -1.37513000 |
| C  | -1.00601800 | 3.22390400  | -0.33272400 |
| C  | -0.15371600 | 1.83311800  | -2.00859600 |
| C  | 0.43237000  | 3.32698200  | -0.30731300 |
| C  | 0.96386200  | 2.47064500  | -1.34868900 |
| C  | -1.69011000 | -0.45488100 | 0.19974800  |

|                |             |             |             |
|----------------|-------------|-------------|-------------|
| C              | -2.85224700 | -0.25439600 | 0.96589600  |
| C              | -1.65273000 | -1.69466700 | -0.46455600 |
| C              | -3.89123400 | -1.19560100 | 1.10513800  |
| F              | -3.03574900 | 0.96531900  | 1.65270800  |
| C              | -2.65857100 | -2.67748900 | -0.37118100 |
| F              | -0.56191900 | -2.00967300 | -1.29540700 |
| C              | -3.78925500 | -2.42497800 | 0.42764200  |
| F              | -5.01432100 | -0.93178000 | 1.88778200  |
| F              | -2.55691900 | -3.88851100 | -1.05555200 |
| F              | -4.79731400 | -3.37479500 | 0.53924500  |
| C              | -2.77764100 | 2.02609600  | -1.86222100 |
| H              | -3.05146000 | 2.75852400  | -2.64254500 |
| H              | -2.88171700 | 1.02625200  | -2.30360900 |
| H              | -3.51916700 | 2.11567000  | -1.05796900 |
| C              | -1.96985700 | 4.04383000  | 0.49309600  |
| H              | -2.28460700 | 4.93841200  | -0.07330100 |
| H              | -2.87729800 | 3.48367600  | 0.75236200  |
| H              | -1.51741600 | 4.39656700  | 1.42903900  |
| C              | -0.07735200 | 0.96504800  | -3.24342000 |
| H              | 0.84199300  | 0.37004700  | -3.26539700 |
| H              | -0.92439700 | 0.26958400  | -3.31458500 |
| H              | -0.09406000 | 1.59782100  | -4.14895500 |
| C              | 1.24260000  | 4.28297900  | 0.53814200  |
| H              | 1.33538400  | 5.25687400  | 0.02535600  |
| H              | 0.77823200  | 4.47061700  | 1.51484400  |
| H              | 2.26119300  | 3.91254400  | 0.71903800  |
| C              | 2.41393900  | 2.39269600  | -1.77138400 |
| H              | 2.63463400  | 1.46052100  | -2.30448900 |
| H              | 2.65642500  | 3.23206000  | -2.44706200 |
| H              | 3.10171600  | 2.45407300  | -0.91586000 |
| H              | 5.86820100  | -3.00920500 | 0.60284100  |
| O              | 2.37849400  | -1.36883000 | -1.97922400 |
| O              | 2.78909500  | -0.18516300 | 2.63635900  |
| C              | 2.59011700  | -2.32981700 | -3.06756800 |
| H              | 1.79634200  | -2.11381400 | -3.79252900 |
| H              | 3.57513000  | -2.19079200 | -3.54497300 |
| H              | 2.48853500  | -3.36641200 | -2.70820000 |
| C              | 3.43038400  | -0.27150900 | 3.95100000  |
| H              | 3.43449200  | -1.30721600 | 4.33024900  |
| H              | 4.46116800  | 0.12110300  | 3.92491200  |
| H              | 2.81274600  | 0.35742100  | 4.60348500  |
| Frequencies -- | 10.3387     | 18.9131     | 25.3631     |
| Frequencies -- | 30.4136     | 36.5653     | 52.7652     |
| Frequencies -- | 63.3782     | 67.2697     | 80.2362     |
| Frequencies -- | 87.2935     | 90.4884     | 95.4813     |
| Frequencies -- | 108.4357    | 112.6204    | 116.5357    |
| Frequencies -- | 125.5787    | 128.5668    | 139.7270    |
| Frequencies -- | 145.7260    | 146.4567    | 149.7587    |
| Frequencies -- | 157.8866    | 165.9942    | 168.2729    |
| Frequencies -- | 175.2152    | 184.6928    | 187.8051    |
| Frequencies -- | 193.4064    | 201.9787    | 208.6750    |
| Frequencies -- | 218.5238    | 231.3970    | 257.2241    |
| Frequencies -- | 264.7521    | 265.7075    | 268.1422    |
| Frequencies -- | 282.0456    | 285.5805    | 291.1293    |
| Frequencies -- | 294.4384    | 299.0751    | 304.2297    |
| Frequencies -- | 314.8823    | 331.8368    | 340.1931    |
| Frequencies -- | 346.8634    | 355.7098    | 372.9963    |



|                |           |           |           |
|----------------|-----------|-----------|-----------|
| Frequencies -- | 383.5742  | 385.0912  | 393.8383  |
| Frequencies -- | 406.6256  | 428.3169  | 460.6683  |
| Frequencies -- | 508.5798  | 522.0737  | 536.8613  |
| Frequencies -- | 539.6056  | 542.9391  | 544.2228  |
| Frequencies -- | 554.6817  | 567.4333  | 575.8987  |
| Frequencies -- | 584.2805  | 592.1487  | 598.2000  |
| Frequencies -- | 603.1057  | 608.1833  | 618.2771  |
| Frequencies -- | 634.7421  | 676.7589  | 688.0515  |
| Frequencies -- | 720.0522  | 721.8930  | 725.3231  |
| Frequencies -- | 729.3761  | 753.6494  | 803.5537  |
| Frequencies -- | 803.7221  | 836.5311  | 853.5840  |
| Frequencies -- | 886.3534  | 909.5491  | 942.1681  |
| Frequencies -- | 968.3448  | 974.8479  | 987.1783  |
| Frequencies -- | 994.9926  | 1038.1656 | 1045.0865 |
| Frequencies -- | 1045.7783 | 1050.8766 | 1052.0002 |
| Frequencies -- | 1052.3594 | 1081.8474 | 1088.6619 |
| Frequencies -- | 1089.8538 | 1102.4547 | 1125.0595 |
| Frequencies -- | 1125.2129 | 1125.3716 | 1166.3608 |
| Frequencies -- | 1170.5524 | 1174.4739 | 1176.6502 |
| Frequencies -- | 1178.4380 | 1187.1893 | 1206.1041 |
| Frequencies -- | 1232.8632 | 1252.7132 | 1287.5374 |
| Frequencies -- | 1295.7104 | 1353.2820 | 1370.3759 |
| Frequencies -- | 1394.7273 | 1410.2041 | 1411.5296 |
| Frequencies -- | 1420.9717 | 1422.1285 | 1425.3881 |
| Frequencies -- | 1427.1711 | 1429.5755 | 1431.1200 |
| Frequencies -- | 1432.4995 | 1445.0675 | 1451.9201 |
| Frequencies -- | 1453.3625 | 1455.9103 | 1459.0242 |
| Frequencies -- | 1462.3629 | 1473.1312 | 1476.5331 |
| Frequencies -- | 1479.0335 | 1483.3548 | 1485.3942 |
| Frequencies -- | 1490.0889 | 1492.2253 | 1493.4582 |
| Frequencies -- | 1495.3365 | 1498.1599 | 1502.3017 |
| Frequencies -- | 1505.3630 | 1507.7374 | 1513.1636 |
| Frequencies -- | 1516.6043 | 1518.0949 | 1589.2753 |
| Frequencies -- | 1590.8003 | 1598.7609 | 1603.9885 |
| Frequencies -- | 2988.6436 | 2993.3589 | 2996.9546 |
| Frequencies -- | 3003.3900 | 3003.5141 | 3004.5802 |
| Frequencies -- | 3005.5199 | 3007.2748 | 3090.8851 |
| Frequencies -- | 3093.7070 | 3096.3314 | 3097.9807 |
| Frequencies -- | 3098.3169 | 3101.9106 | 3104.0526 |
| Frequencies -- | 3111.1032 | 3136.8801 | 3141.8044 |
| Frequencies -- | 3147.9815 | 3150.7155 | 3156.7738 |
| Frequencies -- | 3158.4501 | 3160.8084 | 3163.4419 |
| Frequencies -- | 3172.9898 | 3211.4611 | 3220.0173 |

**Catalyst 31:**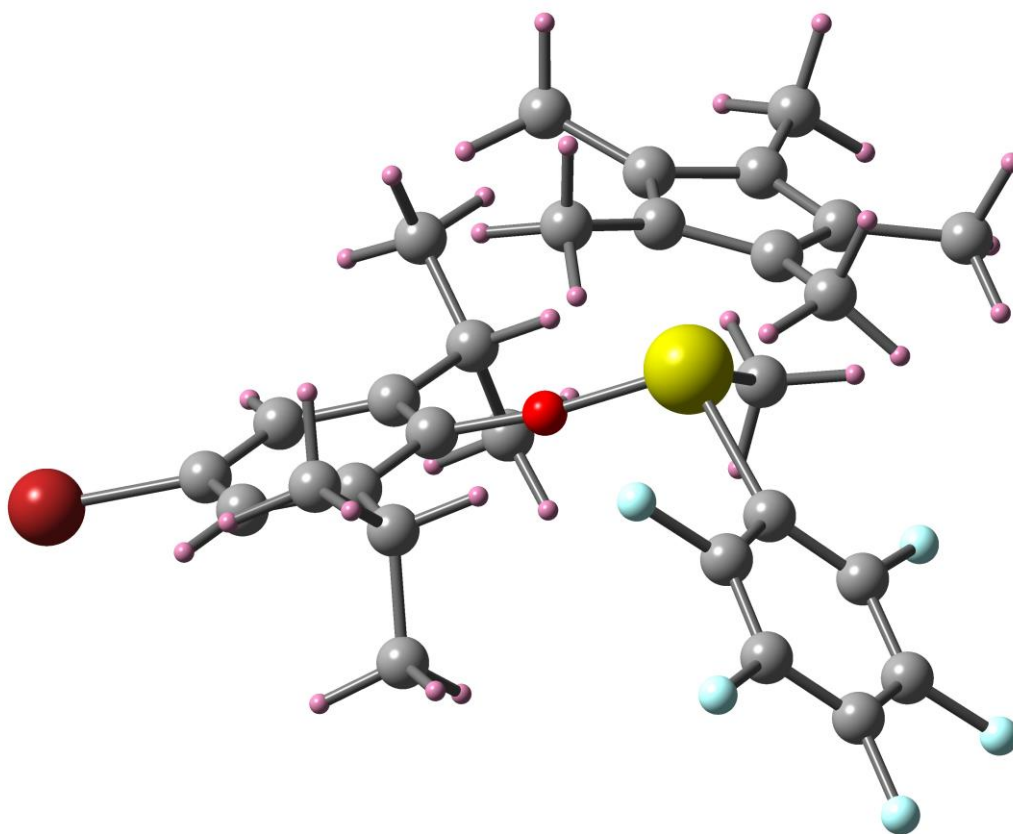

| <b>vacuum</b> | <b>toluene-like solvent</b> | <b>D3 dispersion</b> |
|---------------|-----------------------------|----------------------|
| -1770.6954401 | -1770.7005254               | -0.46126409          |

|    |             |             |             |
|----|-------------|-------------|-------------|
| Ti | 1.10760300  | 1.08386300  | -0.06178700 |
| C  | 1.11474500  | 2.06543400  | -1.90769800 |
| H  | 0.80761600  | 1.26630100  | -2.60632800 |
| H  | 0.42196200  | 2.91046200  | -2.00365300 |
| H  | 2.12826000  | 2.40012500  | -2.16409700 |
| O  | -0.57172300 | 0.39630000  | -0.14275400 |
| C  | -1.91900600 | 0.01717500  | -0.14628800 |
| C  | -2.31360000 | -1.19514200 | 0.51181700  |
| C  | -2.88743600 | 0.82289000  | -0.83554700 |
| C  | -3.67686600 | -1.57290900 | 0.47781600  |
| C  | -4.23792100 | 0.40083700  | -0.84018200 |
| C  | -4.62086400 | -0.77845100 | -0.18638700 |
| H  | -3.98739500 | -2.49226900 | 0.96992200  |
| H  | -4.98277100 | 0.99754000  | -1.36216700 |
| C  | 2.72125100  | 1.64114600  | 1.76750300  |
| C  | 2.87367000  | 2.68503900  | 0.78328000  |
| C  | 1.35758000  | 1.67945900  | 2.25244400  |
| C  | 1.61970300  | 3.38870000  | 0.67201900  |
| C  | 0.67484900  | 2.75923500  | 1.57325800  |
| C  | 2.52185100  | -0.60363200 | -0.43304900 |

|    |             |             |             |
|----|-------------|-------------|-------------|
| C  | 3.35975000  | -0.70952500 | -1.56293300 |
| C  | 2.59175900  | -1.72725000 | 0.40946500  |
| C  | 4.16368000  | -1.83048200 | -1.86030300 |
| F  | 3.45773000  | 0.35021200  | -2.48384200 |
| C  | 3.36578800  | -2.87841500 | 0.17257400  |
| F  | 1.85377600  | -1.73522800 | 1.61456100  |
| C  | 4.16189100  | -2.93180100 | -0.98577500 |
| F  | 4.96196500  | -1.86188400 | -3.00065600 |
| F  | 3.36414500  | -3.95016300 | 1.06275600  |
| F  | 4.94197800  | -4.04757200 | -1.25445200 |
| C  | -1.31510200 | -2.12552900 | 1.20860600  |
| H  | -0.35598700 | -1.60772000 | 1.25267500  |
| C  | -2.51998800 | 2.09197900  | -1.61659000 |
| H  | -1.50154200 | 2.36744200  | -1.33002600 |
| C  | 3.85456600  | 0.82968100  | 2.35273600  |
| H  | 4.40359100  | 1.44599800  | 3.08663300  |
| H  | 3.50089500  | -0.06492100 | 2.87726700  |
| H  | 4.57990700  | 0.51192400  | 1.59184900  |
| C  | 4.16248600  | 3.04933400  | 0.08215400  |
| H  | 4.74718700  | 3.75401000  | 0.70016800  |
| H  | 4.79941400  | 2.17269000  | -0.09774900 |
| H  | 3.98659600  | 3.53704700  | -0.88569400 |
| C  | 0.79936200  | 0.88419800  | 3.41088100  |
| H  | 1.25548700  | -0.10889900 | 3.49525700  |
| H  | 0.99256700  | 1.41926500  | 4.35755900  |
| H  | -0.28731300 | 0.74712600  | 3.33407800  |
| C  | 1.40231200  | 4.68750200  | -0.06856300 |
| H  | 1.72875300  | 5.53162900  | 0.56414200  |
| H  | 1.97734800  | 4.74025900  | -1.00202800 |
| H  | 0.34598300  | 4.85825500  | -0.31511800 |
| C  | -0.70894100 | 3.27233300  | 1.90298700  |
| H  | -1.38070200 | 2.47313000  | 2.24332600  |
| H  | -0.64919500 | 4.01743500  | 2.71613700  |
| H  | -1.18652100 | 3.76490500  | 1.04678700  |
| C  | -1.71610100 | -2.46017400 | 2.67359600  |
| H  | -1.88003200 | -1.54493400 | 3.26375000  |
| H  | -2.63384700 | -3.06540500 | 2.73039400  |
| H  | -0.91032900 | -3.03620900 | 3.15566200  |
| C  | -1.09545100 | -3.42683300 | 0.38062200  |
| H  | -0.76546600 | -3.19464200 | -0.64409500 |
| H  | -0.32328900 | -4.05248300 | 0.85546400  |
| H  | -2.01855400 | -4.02317100 | 0.30881200  |
| C  | -2.51281600 | 1.81029700  | -3.14946100 |
| H  | -2.17505700 | 2.70116900  | -3.70328200 |
| H  | -1.83729100 | 0.97881200  | -3.39875400 |
| H  | -3.51905200 | 1.54744800  | -3.51147600 |
| C  | -3.43421300 | 3.30600600  | -1.28567000 |
| H  | -3.48033200 | 3.49352800  | -0.20205900 |
| H  | -3.04252800 | 4.21280500  | -1.77506000 |
| H  | -4.46453000 | 3.16452200  | -1.64471300 |
| Br | -6.51500800 | -1.32981300 | -0.21049700 |

|                |          |          |          |
|----------------|----------|----------|----------|
| Frequencies -- | 9.9532   | 13.8683  | 24.5374  |
| Frequencies -- | 28.0209  | 36.6275  | 51.7729  |
| Frequencies -- | 58.6309  | 61.7461  | 69.5493  |
| Frequencies -- | 75.3080  | 86.7091  | 91.2160  |
| Frequencies -- | 102.6064 | 109.4849 | 111.6158 |

|                |           |           |           |
|----------------|-----------|-----------|-----------|
| Frequencies -- | 117.2352  | 119.4558  | 122.5475  |
| Frequencies -- | 126.6216  | 132.1253  | 133.4002  |
| Frequencies -- | 135.2774  | 147.0331  | 155.6150  |
| Frequencies -- | 162.9857  | 167.0889  | 174.2447  |
| Frequencies -- | 181.6176  | 191.7582  | 206.8825  |
| Frequencies -- | 210.0163  | 217.3146  | 220.4824  |
| Frequencies -- | 224.9238  | 240.8859  | 247.2613  |
| Frequencies -- | 248.5341  | 254.9152  | 259.0734  |
| Frequencies -- | 264.3532  | 269.9207  | 289.6495  |
| Frequencies -- | 290.5542  | 293.7902  | 300.8846  |
| Frequencies -- | 302.0744  | 302.1994  | 306.7884  |
| Frequencies -- | 310.5128  | 321.8932  | 327.3615  |
| Frequencies -- | 328.4117  | 346.9154  | 361.1539  |
| Frequencies -- | 382.2006  | 384.3099  | 389.5377  |
| Frequencies -- | 417.3227  | 425.3246  | 430.9096  |
| Frequencies -- | 434.7777  | 457.8822  | 461.2520  |
| Frequencies -- | 500.4489  | 533.5503  | 540.0442  |
| Frequencies -- | 542.4361  | 545.3902  | 556.9179  |
| Frequencies -- | 563.4344  | 572.6463  | 585.3968  |
| Frequencies -- | 593.3140  | 600.1639  | 606.1798  |
| Frequencies -- | 613.6012  | 618.3427  | 624.1815  |
| Frequencies -- | 634.1271  | 676.8930  | 686.8582  |
| Frequencies -- | 716.6426  | 726.2692  | 770.0759  |
| Frequencies -- | 774.9189  | 802.8238  | 806.9637  |
| Frequencies -- | 807.9155  | 875.0265  | 887.0788  |
| Frequencies -- | 893.3031  | 901.0626  | 914.3763  |
| Frequencies -- | 930.9884  | 935.4051  | 947.4126  |
| Frequencies -- | 962.5322  | 964.4858  | 971.2414  |
| Frequencies -- | 972.3929  | 995.5154  | 1038.5820 |
| Frequencies -- | 1041.8397 | 1044.3794 | 1047.3372 |
| Frequencies -- | 1049.2591 | 1051.0207 | 1073.2540 |
| Frequencies -- | 1087.7794 | 1088.4257 | 1089.2622 |
| Frequencies -- | 1112.8610 | 1117.0711 | 1125.5857 |
| Frequencies -- | 1126.6165 | 1169.7392 | 1173.6315 |
| Frequencies -- | 1176.2907 | 1182.1476 | 1186.6355 |
| Frequencies -- | 1189.9837 | 1192.1078 | 1264.1711 |
| Frequencies -- | 1266.8288 | 1284.7336 | 1299.2912 |
| Frequencies -- | 1325.6744 | 1337.5070 | 1341.9844 |
| Frequencies -- | 1347.7526 | 1378.2157 | 1390.9611 |
| Frequencies -- | 1398.7857 | 1399.8160 | 1411.8205 |
| Frequencies -- | 1414.1603 | 1417.2236 | 1418.2736 |
| Frequencies -- | 1423.2831 | 1424.6573 | 1425.7400 |
| Frequencies -- | 1428.6170 | 1430.2167 | 1431.7490 |
| Frequencies -- | 1435.3862 | 1439.2624 | 1450.5652 |
| Frequencies -- | 1454.5199 | 1457.3668 | 1458.8715 |
| Frequencies -- | 1463.1806 | 1479.9778 | 1487.3843 |
| Frequencies -- | 1487.5272 | 1488.5030 | 1490.6595 |
| Frequencies -- | 1493.6774 | 1494.8796 | 1500.1703 |
| Frequencies -- | 1502.0293 | 1502.1152 | 1503.9110 |
| Frequencies -- | 1505.6320 | 1506.4903 | 1508.2717 |
| Frequencies -- | 1508.9670 | 1513.3797 | 1515.4861 |
| Frequencies -- | 1519.3494 | 1577.3574 | 1587.4597 |
| Frequencies -- | 1588.8938 | 1602.1126 | 2996.9521 |
| Frequencies -- | 3005.2341 | 3006.2143 | 3006.5222 |
| Frequencies -- | 3007.6780 | 3008.1044 | 3008.8241 |
| Frequencies -- | 3009.8371 | 3011.6851 | 3012.6888 |
| Frequencies -- | 3098.2820 | 3099.6947 | 3101.8342 |
| Frequencies -- | 3104.0521 | 3105.0281 | 3106.1476 |
| Frequencies -- | 3107.2438 | 3109.2396 | 3110.5696 |
| Frequencies -- | 3113.6514 | 3116.6503 | 3119.0349 |
| Frequencies -- | 3120.3902 | 3125.4400 | 3139.3372 |
| Frequencies -- | 3143.2023 | 3147.3503 | 3150.6956 |
| Frequencies -- | 3155.5262 | 3160.4313 | 3162.2102 |

Frequencies -- 3179.5850                      3209.2603                      3211.9395

**Catalyst 33:**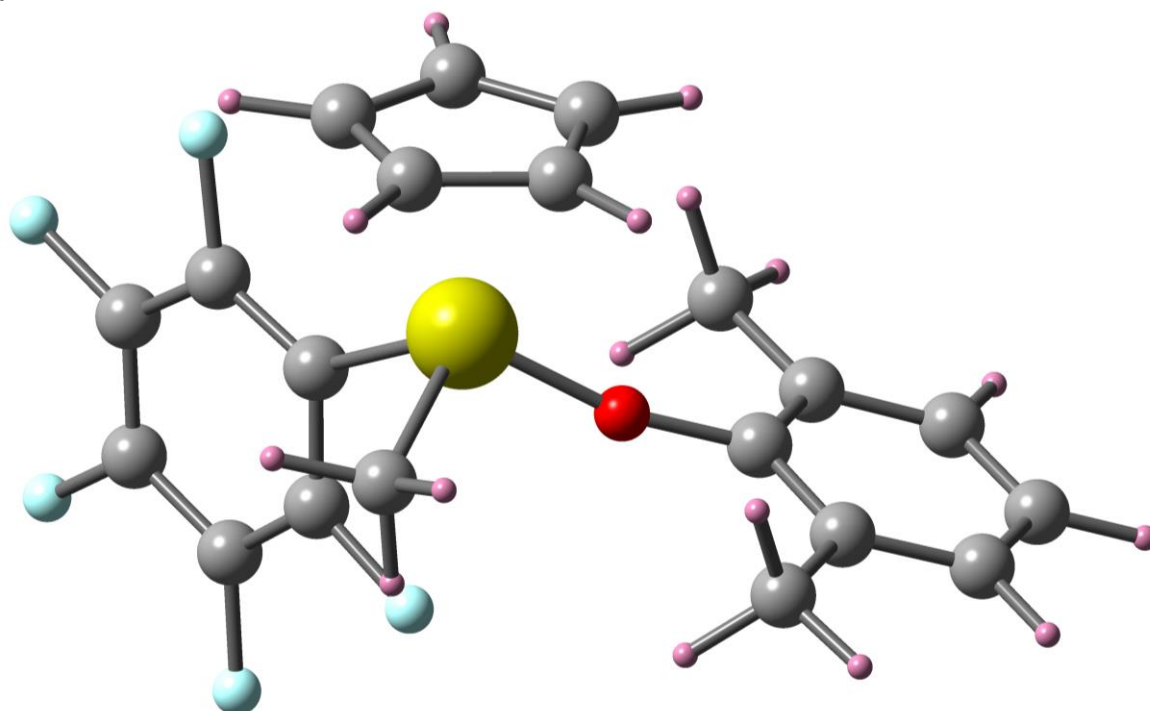

| <b>vacuum</b> | <b>toluene-like solvent</b> | <b>D3 dispersion</b> |
|---------------|-----------------------------|----------------------|
| -1404.5192987 | -1404.5261955               | -0.28049707          |

|    |             |             |             |
|----|-------------|-------------|-------------|
| Ti | 0.39357500  | 1.24403700  | 0.46180800  |
| C  | 0.39497600  | 1.45644800  | 2.54112800  |
| H  | 0.32057000  | 0.41908000  | 2.90894400  |
| H  | 1.29528800  | 1.92927400  | 2.96150800  |
| H  | -0.49409900 | 2.03032800  | 2.85399100  |
| O  | 1.60341600  | -0.03462600 | 0.19578900  |
| C  | 2.65465400  | -0.83251700 | -0.23587900 |
| C  | 2.56005800  | -1.48071000 | -1.50331300 |
| C  | 3.78150900  | -0.99744500 | 0.62320600  |
| C  | 3.64539500  | -2.29308400 | -1.90687400 |
| C  | 4.83860600  | -1.81986800 | 0.16996400  |
| C  | 4.77882400  | -2.46049500 | -1.08489200 |
| H  | 3.59470600  | -2.80217000 | -2.87156300 |
| H  | 5.71095100  | -1.96195400 | 0.81115400  |
| H  | 5.60506100  | -3.09288700 | -1.41584400 |
| H  | -0.51853900 | 2.46491400  | -2.25499700 |
| C  | 0.05203800  | 2.78415000  | -1.39017800 |
| C  | -0.48402000 | 3.44237400  | -0.22870200 |
| C  | 1.46574700  | 2.63677300  | -1.20412400 |
| H  | -1.52620400 | 3.69504300  | -0.06958400 |
| C  | 0.59743200  | 3.69459900  | 0.67437000  |
| H  | 2.16069400  | 2.17582500  | -1.89940400 |
| C  | 1.80226300  | 3.18799800  | 0.07690300  |
| H  | 0.52197700  | 4.17760800  | 1.64264000  |
| H  | 2.79439800  | 3.21413200  | 0.51933200  |
| F  | -5.03630900 | -2.26848600 | 0.03521400  |
| C  | -3.89834700 | -1.47800600 | 0.08060400  |

|   |             |             |             |
|---|-------------|-------------|-------------|
| C | -3.86278100 | -0.24275200 | -0.59043700 |
| C | -2.76409000 | -1.90096000 | 0.79682300  |
| C | -2.69350100 | 0.54382500  | -0.52751800 |
| F | -4.97996700 | 0.18275300  | -1.30311000 |
| C | -1.62681500 | -1.07090800 | 0.81984100  |
| F | -2.78567200 | -3.12155200 | 1.46380700  |
| C | -1.52225000 | 0.18089700  | 0.17111400  |
| F | -2.76586700 | 1.75725400  | -1.23690600 |
| F | -0.53424200 | -1.56891100 | 1.55678700  |
| C | 1.33346900  | -1.33037800 | -2.38666800 |
| H | 0.41954600  | -1.64142000 | -1.85840900 |
| H | 1.18136400  | -0.28744400 | -2.70581700 |
| H | 1.42761400  | -1.94567600 | -3.29187700 |
| C | 3.84218200  | -0.32749300 | 1.98433500  |
| H | 3.84214100  | 0.77096000  | 1.89722700  |
| H | 2.97281200  | -0.60012900 | 2.60089700  |
| H | 4.75217500  | -0.62148900 | 2.52536800  |

|                |           |           |           |
|----------------|-----------|-----------|-----------|
| Frequencies -- | 15.8513   | 22.2701   | 27.2674   |
| Frequencies -- | 40.7063   | 64.9421   | 73.2596   |
| Frequencies -- | 86.7657   | 94.2809   | 103.5289  |
| Frequencies -- | 114.9973  | 123.5514  | 129.5209  |
| Frequencies -- | 139.6047  | 149.7391  | 153.1216  |
| Frequencies -- | 177.1959  | 200.1414  | 203.0760  |
| Frequencies -- | 208.1629  | 216.8755  | 225.0620  |
| Frequencies -- | 231.1200  | 245.0850  | 264.9759  |
| Frequencies -- | 266.3359  | 272.0541  | 301.3084  |
| Frequencies -- | 315.4119  | 327.5000  | 336.9248  |
| Frequencies -- | 349.8662  | 356.4577  | 382.6154  |
| Frequencies -- | 397.0621  | 428.3661  | 460.4016  |
| Frequencies -- | 490.8863  | 509.3707  | 512.8574  |
| Frequencies -- | 544.3782  | 550.8136  | 552.2682  |
| Frequencies -- | 563.5405  | 570.2937  | 577.3789  |
| Frequencies -- | 588.7106  | 597.9207  | 641.3464  |
| Frequencies -- | 676.0555  | 688.4857  | 721.9672  |
| Frequencies -- | 740.8551  | 742.7950  | 744.7916  |
| Frequencies -- | 783.1623  | 794.0873  | 805.9185  |
| Frequencies -- | 810.4895  | 842.1365  | 842.9947  |
| Frequencies -- | 880.3296  | 890.8927  | 903.0253  |
| Frequencies -- | 908.4191  | 922.2634  | 931.0247  |
| Frequencies -- | 984.0632  | 1001.1864 | 1005.4033 |
| Frequencies -- | 1028.2300 | 1035.6048 | 1043.3798 |
| Frequencies -- | 1050.3008 | 1055.5091 | 1059.1120 |
| Frequencies -- | 1090.4623 | 1093.8830 | 1110.0389 |
| Frequencies -- | 1131.8930 | 1176.7575 | 1191.8257 |
| Frequencies -- | 1192.4257 | 1219.1999 | 1278.5365 |
| Frequencies -- | 1279.8357 | 1282.1028 | 1284.3580 |
| Frequencies -- | 1341.0870 | 1362.1523 | 1389.2482 |
| Frequencies -- | 1397.1206 | 1401.6984 | 1418.8951 |
| Frequencies -- | 1419.8650 | 1429.3942 | 1431.5122 |
| Frequencies -- | 1443.4395 | 1445.6389 | 1450.2160 |
| Frequencies -- | 1457.1623 | 1472.0313 | 1485.3668 |
| Frequencies -- | 1489.7915 | 1503.7177 | 1504.5082 |
| Frequencies -- | 1587.2690 | 1598.6649 | 1604.6577 |
| Frequencies -- | 1608.4277 | 2986.5625 | 3016.3077 |
| Frequencies -- | 3018.8228 | 3102.8377 | 3103.6530 |
| Frequencies -- | 3108.7720 | 3126.3476 | 3132.2419 |
| Frequencies -- | 3132.8006 | 3160.2224 | 3171.6513 |
| Frequencies -- | 3192.6207 | 3235.7727 | 3250.4563 |
| Frequencies -- | 3261.9875 | 3269.1187 | 3287.6540 |

## 8. Additional Geometries

[\(return to table of contents\)](#)

### B(C<sub>6</sub>F<sub>5</sub>)<sub>3</sub> Activator:

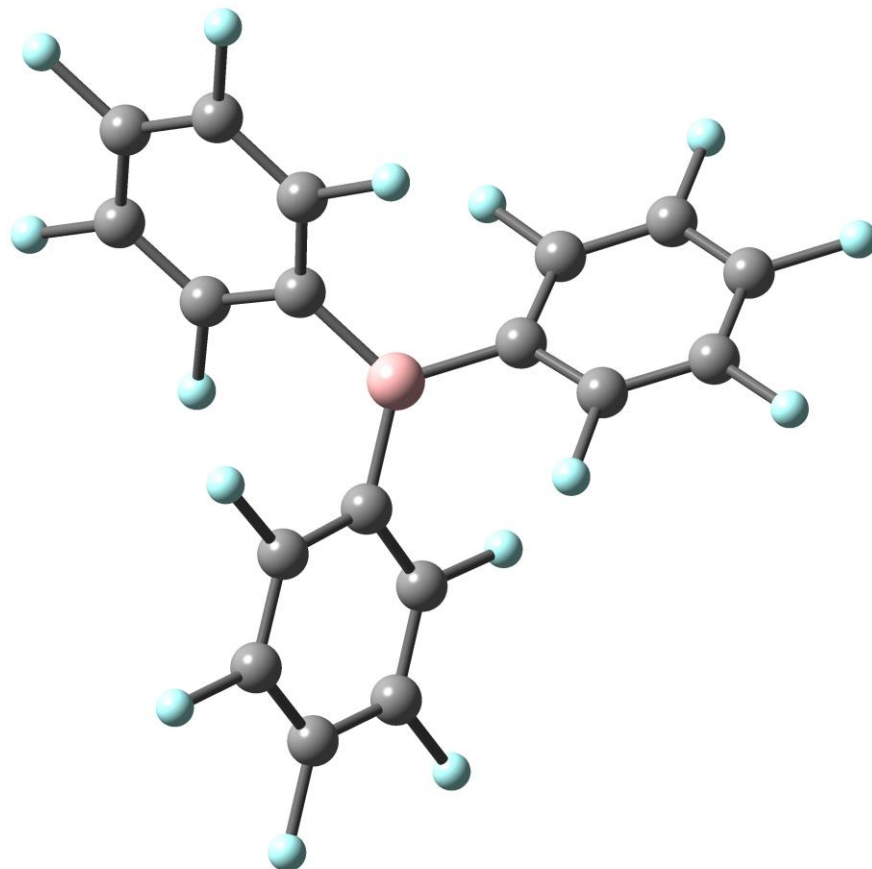

| vacuum       | toluene-like solvent | D3 dispersion |
|--------------|----------------------|---------------|
| -2207.755517 | -2207.7616892        | -0.23126086   |

|   |             |             |             |
|---|-------------|-------------|-------------|
| C | -0.40282700 | 1.52414500  | 0.00013200  |
| C | 0.23171500  | 2.47638300  | 0.83342900  |
| C | -1.42557600 | 2.03716800  | -0.83344500 |
| C | -0.12059200 | 3.83720100  | 0.85827800  |
| C | -1.79318100 | 3.39389400  | -0.85856800 |
| C | -1.13785200 | 4.29831800  | -0.00012300 |
| C | 1.52314800  | -0.41414500 | -0.00053500 |
| C | 2.03031600  | -1.44152400 | 0.83117300  |
| C | 2.47961100  | 0.21708100  | -0.83173500 |
| C | 3.38493000  | -1.81682000 | 0.85602100  |
| C | 3.83841100  | -0.14269800 | -0.85654800 |
| C | 4.29346700  | -1.16459100 | -0.00036900 |
| C | -1.11875700 | -1.11216200 | 0.00061800  |
| C | -2.26130700 | -1.03640100 | 0.83294800  |
| C | -1.05310000 | -2.25488800 | -0.83220800 |
| C | -3.26506400 | -2.02048300 | 0.85800600  |



|   |             |             |             |
|---|-------------|-------------|-------------|
| C | -2.04557500 | -3.25030700 | -0.85706300 |
| C | -3.15686900 | -3.13286900 | 0.00059200  |
| F | -4.13702500 | -4.10464000 | 0.00041700  |
| F | -4.35020400 | -1.90837200 | 1.70973900  |
| F | -2.40024100 | 0.03660200  | 1.71321800  |
| F | -1.94292000 | -4.33624100 | -1.70895700 |
| F | 0.01851800  | -2.40254500 | -1.71271800 |
| F | 1.17175500  | -2.10008000 | 1.71126900  |
| F | 3.83168400  | -2.81295600 | 1.70672000  |
| F | 5.62563900  | -1.52544800 | -0.00052500 |
| F | 4.72697900  | 0.49168300  | -1.70712700 |
| F | 2.07100100  | 1.21965900  | -1.71108100 |
| F | 1.22999300  | 2.06122700  | 1.71471400  |
| F | 0.51675500  | 4.72169300  | 1.71092200  |
| F | -1.49113300 | 5.63258900  | -0.00041600 |
| F | -2.78460700 | 3.84668200  | -1.71155700 |
| F | -2.08722300 | 1.18242500  | -1.71509200 |
| B | 0.00077100  | -0.00086000 | 0.00012800  |

|                |           |           |           |
|----------------|-----------|-----------|-----------|
| Frequencies -- | 17.6967   | 18.2354   | 30.5553   |
| Frequencies -- | 30.6426   | 30.9701   | 34.3154   |
| Frequencies -- | 95.6318   | 101.4191  | 102.1182  |
| Frequencies -- | 118.9707  | 119.2363  | 120.6209  |
| Frequencies -- | 136.7387  | 137.1893  | 149.9783  |
| Frequencies -- | 152.8409  | 158.5688  | 158.6620  |
| Frequencies -- | 212.8032  | 218.0167  | 218.6808  |
| Frequencies -- | 265.8775  | 266.0820  | 266.2742  |
| Frequencies -- | 268.2346  | 268.5558  | 269.3294  |
| Frequencies -- | 295.1038  | 295.2159  | 295.3586  |
| Frequencies -- | 320.1864  | 320.6874  | 331.0118  |
| Frequencies -- | 343.4051  | 374.9435  | 375.2295  |
| Frequencies -- | 380.3889  | 381.5169  | 382.4401  |
| Frequencies -- | 426.2781  | 426.7134  | 426.8216  |
| Frequencies -- | 456.1621  | 456.3382  | 473.8504  |
| Frequencies -- | 536.1207  | 541.2468  | 541.4305  |
| Frequencies -- | 548.9237  | 606.5069  | 606.7613  |
| Frequencies -- | 641.4006  | 641.5789  | 644.9591  |
| Frequencies -- | 651.9160  | 652.4695  | 655.6512  |
| Frequencies -- | 731.8270  | 732.2109  | 737.3612  |
| Frequencies -- | 762.9672  | 763.4875  | 779.3398  |
| Frequencies -- | 817.8536  | 913.6078  | 913.7342  |
| Frequencies -- | 917.1406  | 966.0895  | 966.1578  |
| Frequencies -- | 1048.3298 | 1072.3427 | 1072.9749 |
| Frequencies -- | 1073.1434 | 1127.4978 | 1127.7130 |
| Frequencies -- | 1238.1661 | 1260.2953 | 1260.7076 |
| Frequencies -- | 1348.5144 | 1349.0855 | 1349.4669 |
| Frequencies -- | 1354.3171 | 1354.4040 | 1355.4056 |
| Frequencies -- | 1436.6848 | 1438.1604 | 1438.3211 |
| Frequencies -- | 1470.4093 | 1472.2138 | 1472.5017 |
| Frequencies -- | 1591.7911 | 1592.8677 | 1593.2196 |
| Frequencies -- | 1622.1443 | 1622.5544 | 1624.3538 |

**Precatalyst 1:**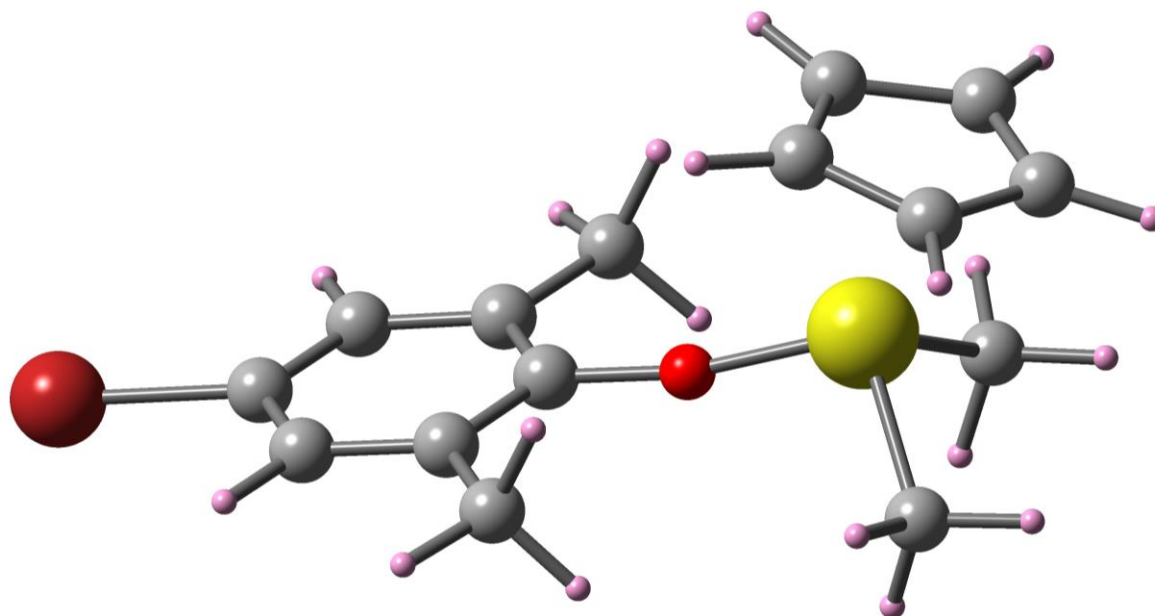

| <b>vacuum</b> | <b>toluene-like solvent</b> | <b>D3 dispersion</b> |
|---------------|-----------------------------|----------------------|
| -729.32764055 | -729.33229740               | -0.2237939           |

|    |             |             |             |
|----|-------------|-------------|-------------|
| C  | 3.26319200  | 1.61791800  | -1.65227400 |
| H  | 2.68508100  | 1.46610300  | -2.58360600 |
| H  | 3.01253300  | 2.60579400  | -1.23273100 |
| H  | 4.34143300  | 1.59058100  | -1.88270900 |
| O  | 0.91444600  | 0.00011100  | -0.53019500 |
| C  | -0.45435100 | 0.00007700  | -0.34057300 |
| C  | -1.14579600 | -1.24547600 | -0.25784900 |
| C  | -1.14584400 | 1.24558300  | -0.25760500 |
| C  | -2.54870300 | -1.22646100 | -0.07760000 |
| C  | -2.54875400 | 1.22646900  | -0.07736700 |
| C  | -3.23185600 | -0.00001800 | 0.01308800  |
| H  | -3.09309100 | -2.16828600 | -0.01341400 |
| H  | -3.09318100 | 2.16825900  | -0.01301500 |
| H  | 4.45670200  | -2.19298300 | 1.03779000  |
| C  | 4.16338800  | -1.16150000 | 1.20376900  |
| C  | 4.90251100  | -0.00047100 | 0.80354800  |
| C  | 2.96153200  | -0.71884500 | 1.85485400  |
| H  | 5.84497500  | -0.00047000 | 0.26260400  |
| C  | 4.16370000  | 1.16057100  | 1.20427200  |
| H  | 2.19238800  | -1.35561500 | 2.28262300  |
| C  | 2.96170300  | 0.71793700  | 1.85513500  |
| H  | 4.45724500  | 2.19205100  | 1.03870100  |
| H  | 2.19270500  | 1.35471300  | 2.28315300  |
| C  | 3.26323500  | -1.61664100 | -1.65356400 |
| H  | 3.01252300  | -2.60485600 | -1.23487000 |
| H  | 4.34152800  | -1.58905700 | -1.88371500 |
| H  | 2.68528100  | -1.46400600 | -2.58484900 |
| Ti | 2.71592400  | 0.00014300  | -0.42692100 |

|    |             |             |             |
|----|-------------|-------------|-------------|
| C  | -0.40638400 | 2.56730900  | -0.36614600 |
| H  | 0.29878500  | 2.70367300  | 0.46943400  |
| H  | 0.18331600  | 2.61785700  | -1.29313200 |
| H  | -1.10703000 | 3.41361000  | -0.35707200 |
| C  | -0.40627900 | -2.56714500 | -0.36672100 |
| H  | 0.18340600  | -2.61741600 | -1.29373500 |
| H  | 0.29890800  | -2.70370100 | 0.46880900  |
| H  | -1.10689200 | -3.41347700 | -0.35786200 |
| Br | -5.18857900 | -0.00007500 | 0.26318900  |

|                |           |           |           |
|----------------|-----------|-----------|-----------|
| Frequencies -- | 18.3892   | 20.9685   | 23.0538   |
| Frequencies -- | 62.8283   | 73.8451   | 108.9473  |
| Frequencies -- | 111.5527  | 141.1170  | 141.3924  |
| Frequencies -- | 147.4809  | 164.1667  | 176.4402  |
| Frequencies -- | 184.5121  | 194.5945  | 198.9665  |
| Frequencies -- | 207.7273  | 220.5359  | 226.0567  |
| Frequencies -- | 238.1836  | 241.1881  | 257.2772  |
| Frequencies -- | 317.8002  | 349.7343  | 375.5476  |
| Frequencies -- | 420.0166  | 485.1746  | 500.8086  |
| Frequencies -- | 507.9968  | 509.8653  | 556.6565  |
| Frequencies -- | 561.8447  | 564.1243  | 572.5740  |
| Frequencies -- | 575.7282  | 582.5641  | 591.9964  |
| Frequencies -- | 638.8290  | 665.8422  | 737.8811  |
| Frequencies -- | 771.6250  | 788.2859  | 795.3323  |
| Frequencies -- | 799.9422  | 841.0318  | 841.1528  |
| Frequencies -- | 868.3430  | 884.0277  | 885.9703  |
| Frequencies -- | 894.9929  | 924.5234  | 950.4377  |
| Frequencies -- | 1011.2187 | 1024.2010 | 1029.7853 |
| Frequencies -- | 1049.2128 | 1054.8312 | 1057.4435 |
| Frequencies -- | 1086.3561 | 1086.8591 | 1123.6882 |
| Frequencies -- | 1128.4638 | 1162.9712 | 1177.6118 |
| Frequencies -- | 1236.9216 | 1262.6439 | 1278.2251 |
| Frequencies -- | 1293.5676 | 1353.9067 | 1393.6093 |
| Frequencies -- | 1397.9065 | 1413.1858 | 1419.3412 |
| Frequencies -- | 1424.3285 | 1429.9843 | 1434.2199 |
| Frequencies -- | 1436.5183 | 1438.7820 | 1443.0553 |
| Frequencies -- | 1444.1868 | 1447.5336 | 1482.3108 |
| Frequencies -- | 1482.7432 | 1500.1938 | 1502.4685 |
| Frequencies -- | 1589.5157 | 1592.1378 | 2970.1066 |
| Frequencies -- | 2973.7607 | 3016.7667 | 3017.1944 |
| Frequencies -- | 3088.1057 | 3093.0227 | 3104.4127 |
| Frequencies -- | 3104.5233 | 3112.0504 | 3113.2502 |
| Frequencies -- | 3134.4508 | 3134.6199 | 3195.2481 |
| Frequencies -- | 3197.1903 | 3233.3135 | 3234.4484 |
| Frequencies -- | 3249.5058 | 3259.9357 | 3275.2879 |

**Catalyst 1 Activation Transition State:**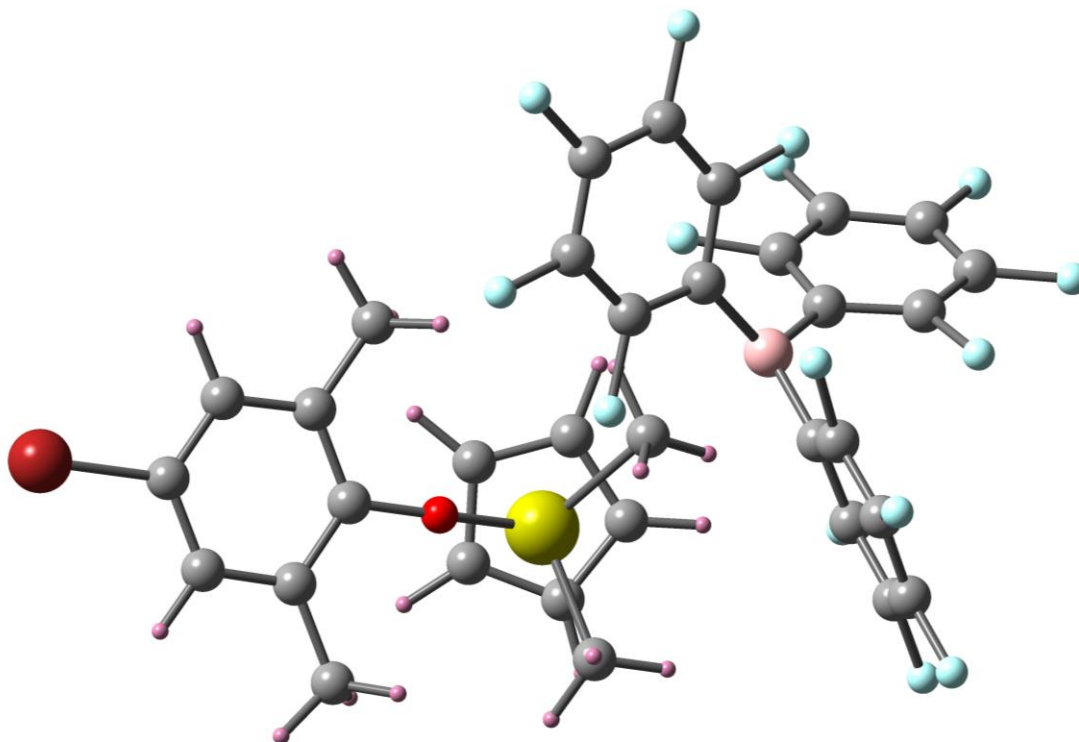

| <b>vacuum</b> | <b>toluene-like solvent</b> | <b>D3 dispersion</b> |
|---------------|-----------------------------|----------------------|
| -2937.0651556 | -2937.0751054               | -0.49173103          |

Imaginary frequency corresponding to vibration along the reaction coordinate:  $-184 \text{ cm}^{-1}$ .

|    |             |             |             |
|----|-------------|-------------|-------------|
| Ti | -1.23094100 | -2.48656800 | -0.08136900 |
| C  | -0.90428300 | -3.27973600 | 1.82456100  |
| H  | -1.00859600 | -2.41186300 | 2.50282800  |
| H  | -1.63320800 | -4.04996100 | 2.12057600  |
| H  | 0.11300300  | -3.69604000 | 1.90718600  |
| O  | -2.71388400 | -1.51408900 | 0.14844700  |
| C  | -3.98127300 | -0.94775600 | 0.08646700  |
| C  | -4.23717900 | 0.08650100  | -0.86147800 |
| C  | -4.98333900 | -1.40369700 | 0.99324400  |
| C  | -5.53193500 | 0.65384200  | -0.89946100 |
| C  | -6.26602900 | -0.81261100 | 0.92377300  |
| C  | -6.52925700 | 0.20015400  | -0.01686400 |
| H  | -5.74674200 | 1.44802100  | -1.61359500 |
| H  | -7.04510800 | -1.14523200 | 1.60880000  |
| H  | 0.17611200  | -2.55895700 | -2.91552400 |
| C  | -0.38962500 | -3.22791800 | -2.27468000 |
| C  | 0.15652000  | -4.14824700 | -1.31776500 |
| C  | -1.81983700 | -3.34876400 | -2.24021600 |
| H  | 1.21081100  | -4.29139900 | -1.09664000 |
| C  | -0.93202400 | -4.83535700 | -0.68785100 |
| H  | -2.52427800 | -2.79897500 | -2.85685600 |

|    |             |             |             |
|----|-------------|-------------|-------------|
| C  | -2.15742000 | -4.33735000 | -1.25398200 |
| H  | -0.84690000 | -5.59956500 | 0.07719500  |
| H  | -3.16107400 | -4.66613100 | -0.99910100 |
| F  | -0.69360600 | 5.58324900  | -1.13286300 |
| C  | -0.01807500 | 4.41159200  | -0.84074500 |
| C  | 1.17837700  | 4.09200800  | -1.50319400 |
| C  | -0.51428300 | 3.52688500  | 0.13312800  |
| C  | 1.84405500  | 2.88874900  | -1.19550700 |
| F  | 1.69826500  | 4.96485400  | -2.44705900 |
| C  | 0.19089600  | 2.34414500  | 0.41267200  |
| F  | -1.68665000 | 3.83055900  | 0.81073400  |
| C  | 1.38016600  | 1.94320100  | -0.24651000 |
| F  | 3.05113900  | 2.68648700  | -1.86914500 |
| F  | -0.34879000 | 1.54775300  | 1.43098600  |
| B  | 2.17405900  | 0.57588500  | 0.09502500  |
| C  | 3.18964500  | 0.00738400  | -1.03115600 |
| C  | 2.56836200  | 0.30811100  | 1.64175600  |
| C  | 0.39105800  | -0.98701000 | -0.11573100 |
| C  | 4.56878600  | -0.20560400 | -0.78266600 |
| C  | 2.81053600  | -0.26704700 | -2.36788600 |
| C  | 2.70503100  | 1.34683900  | 2.59645500  |
| C  | 2.86886700  | -0.97596300 | 2.16060900  |
| H  | 0.14033900  | -0.42335800 | -1.01221800 |
| H  | 1.23658300  | -1.66814500 | -0.15983200 |
| H  | 0.10991200  | -0.56107500 | 0.84719400  |
| C  | 5.47924100  | -0.69187500 | -1.74187200 |
| F  | 5.12220100  | 0.10890900  | 0.46053700  |
| C  | 3.67666500  | -0.76534900 | -3.35596700 |
| F  | 1.49407100  | -0.02517200 | -2.78834000 |
| C  | 3.05015000  | 1.13846900  | 3.94650100  |
| F  | 2.53701700  | 2.68188000  | 2.22171400  |
| C  | 3.20688900  | -1.23609900 | 3.49921300  |
| F  | 2.85785900  | -2.09375000 | 1.31357600  |
| C  | 5.02886900  | -0.98607700 | -3.03939400 |
| F  | 6.81503800  | -0.87442800 | -1.41813000 |
| F  | 3.21196600  | -1.02899500 | -4.63771300 |
| C  | 3.29320300  | -0.16606400 | 4.40741200  |
| F  | 3.16035200  | 2.20957500  | 4.82013600  |
| F  | 3.46555800  | -2.53100400 | 3.92664300  |
| F  | 5.90294100  | -1.47156100 | -3.99548200 |
| F  | 3.62602200  | -0.39442800 | 5.73064900  |
| C  | -3.16000100 | 0.59316100  | -1.80401000 |
| H  | -2.28005800 | 0.94365000  | -1.24588500 |
| H  | -2.81758600 | -0.19311500 | -2.49445800 |
| H  | -3.53138500 | 1.43015500  | -2.41026900 |
| C  | -4.69878800 | -2.48470400 | 2.02065900  |
| H  | -4.41016200 | -3.43361300 | 1.54174800  |
| H  | -3.87193400 | -2.19475400 | 2.68602500  |
| H  | -5.58355300 | -2.67772200 | 2.64215100  |
| Br | -8.32311200 | 1.00393200  | -0.09300500 |

|                |           |         |          |
|----------------|-----------|---------|----------|
| Frequencies -- | -183.8661 | 4.5614  | 8.5315   |
| Frequencies -- | 16.8737   | 20.0249 | 27.4211  |
| Frequencies -- | 28.6398   | 30.3710 | 32.8762  |
| Frequencies -- | 36.6830   | 37.3286 | 43.4041  |
| Frequencies -- | 48.5035   | 48.8595 | 72.9966  |
| Frequencies -- | 77.1507   | 96.7297 | 100.6667 |

|                |           |           |           |
|----------------|-----------|-----------|-----------|
| Frequencies -- | 102.9649  | 109.1374  | 114.0004  |
| Frequencies -- | 121.8193  | 123.3887  | 133.1781  |
| Frequencies -- | 135.1972  | 147.5569  | 149.0618  |
| Frequencies -- | 151.8367  | 152.5186  | 155.5909  |
| Frequencies -- | 157.6088  | 161.0066  | 162.9741  |
| Frequencies -- | 167.0030  | 180.7594  | 197.3821  |
| Frequencies -- | 210.0547  | 216.7000  | 219.1624  |
| Frequencies -- | 221.2567  | 222.7961  | 225.4808  |
| Frequencies -- | 231.2921  | 241.1089  | 248.8848  |
| Frequencies -- | 258.1735  | 262.0123  | 264.7461  |
| Frequencies -- | 265.4727  | 265.7275  | 271.7371  |
| Frequencies -- | 274.4960  | 277.3224  | 281.3837  |
| Frequencies -- | 295.9716  | 305.8494  | 307.5048  |
| Frequencies -- | 316.6161  | 329.2604  | 329.4745  |
| Frequencies -- | 333.2902  | 339.1174  | 352.2322  |
| Frequencies -- | 365.7820  | 378.9334  | 379.7496  |
| Frequencies -- | 380.6457  | 383.0718  | 384.2485  |
| Frequencies -- | 390.9587  | 430.1714  | 430.7226  |
| Frequencies -- | 431.1013  | 431.3722  | 455.1898  |
| Frequencies -- | 455.2862  | 469.0332  | 498.6573  |
| Frequencies -- | 503.0345  | 509.3144  | 513.7843  |
| Frequencies -- | 541.9011  | 542.1153  | 550.1872  |
| Frequencies -- | 561.3282  | 564.4850  | 567.6301  |
| Frequencies -- | 572.4262  | 579.0362  | 584.7154  |
| Frequencies -- | 604.1211  | 604.5974  | 640.4267  |
| Frequencies -- | 640.6359  | 642.6640  | 645.8358  |
| Frequencies -- | 653.7044  | 654.5606  | 663.5747  |
| Frequencies -- | 723.4794  | 730.2579  | 731.7273  |
| Frequencies -- | 734.5964  | 748.0293  | 755.6706  |
| Frequencies -- | 755.9259  | 768.3730  | 779.3298  |
| Frequencies -- | 793.2533  | 799.0797  | 800.6444  |
| Frequencies -- | 807.2210  | 840.4125  | 841.2340  |
| Frequencies -- | 842.0027  | 853.9356  | 868.1064  |
| Frequencies -- | 884.3231  | 888.8547  | 895.3551  |
| Frequencies -- | 907.5698  | 908.3591  | 910.4071  |
| Frequencies -- | 929.2380  | 947.8881  | 948.9272  |
| Frequencies -- | 950.5240  | 1012.6207 | 1027.6893 |
| Frequencies -- | 1033.1229 | 1037.4453 | 1051.1879 |
| Frequencies -- | 1056.5025 | 1058.6673 | 1060.9815 |
| Frequencies -- | 1061.8836 | 1063.1311 | 1088.8347 |
| Frequencies -- | 1089.4058 | 1090.6975 | 1091.7731 |
| Frequencies -- | 1125.6993 | 1127.5780 | 1180.7988 |
| Frequencies -- | 1218.5310 | 1225.9723 | 1235.6938 |
| Frequencies -- | 1236.5413 | 1266.7271 | 1283.3021 |
| Frequencies -- | 1289.9174 | 1333.9770 | 1334.8949 |
| Frequencies -- | 1336.8678 | 1341.1510 | 1344.5367 |
| Frequencies -- | 1344.8963 | 1354.1795 | 1391.0921 |
| Frequencies -- | 1396.8651 | 1402.5263 | 1412.3910 |
| Frequencies -- | 1414.6044 | 1419.6360 | 1422.9928 |
| Frequencies -- | 1425.3421 | 1429.2357 | 1430.8282 |
| Frequencies -- | 1432.2100 | 1434.5813 | 1441.5592 |
| Frequencies -- | 1444.5564 | 1447.2099 | 1473.3143 |
| Frequencies -- | 1473.5787 | 1474.0129 | 1486.7269 |
| Frequencies -- | 1487.4856 | 1500.6216 | 1503.1941 |
| Frequencies -- | 1589.7774 | 1592.4116 | 1592.9962 |
| Frequencies -- | 1594.8810 | 1595.2294 | 1621.4318 |
| Frequencies -- | 1621.7110 | 1623.6572 | 2976.2951 |
| Frequencies -- | 3019.4332 | 3025.4469 | 3084.8459 |
| Frequencies -- | 3096.7056 | 3106.2457 | 3113.2145 |
| Frequencies -- | 3123.9600 | 3136.4115 | 3139.1762 |
| Frequencies -- | 3200.5782 | 3202.5539 | 3238.0514 |
| Frequencies -- | 3238.7625 | 3254.1412 | 3264.1604 |
| Frequencies -- | 3271.5156 | 3278.4699 | 3290.7776 |

**Catalyst 1 Dimerization Geometries:****conformation 1**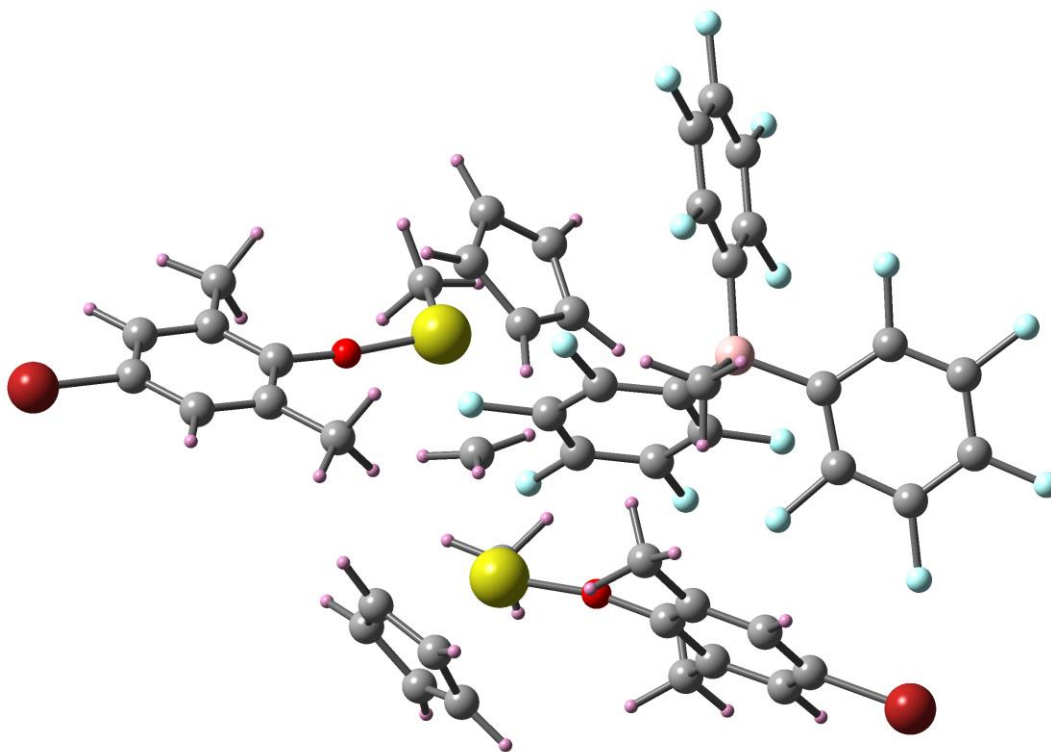

| <b>vacuum</b> | <b>toluene-like solvent</b> | <b>D3 dispersion</b> |
|---------------|-----------------------------|----------------------|
| -3666.4012455 | -3666.4243198               | -0.73396683          |

|    |             |             |             |
|----|-------------|-------------|-------------|
| Ti | -1.62496500 | 2.20608700  | 1.60371000  |
| C  | -0.60370600 | 1.01795500  | 2.95723200  |
| H  | 0.12304700  | 0.48843000  | 2.31662800  |
| H  | -0.05145000 | 1.57875800  | 3.72527100  |
| H  | -1.26940200 | 0.29575500  | 3.45540500  |
| O  | -0.29945600 | 3.01221800  | 0.74285000  |
| C  | 0.61704000  | 3.88637100  | 0.16081600  |
| C  | 0.35823800  | 4.37982600  | -1.15125200 |
| C  | 1.79270600  | 4.23509800  | 0.88891100  |
| C  | 1.30523800  | 5.25189500  | -1.73244800 |
| C  | 2.71822100  | 5.10596700  | 0.26886500  |
| C  | 2.46825200  | 5.60772100  | -1.02217200 |
| C  | -3.36521200 | 3.83295200  | 1.56467300  |
| C  | -4.03322900 | 2.63360700  | 1.99649200  |
| C  | -2.42534400 | 4.20666300  | 2.58520600  |
| C  | -3.50217900 | 2.26450100  | 3.27440100  |
| C  | -2.50894500 | 3.23204300  | 3.63910200  |
| B  | 3.27027600  | -1.54141400 | -0.07498800 |
| C  | 3.02846900  | -1.77696100 | 1.57590600  |
| C  | 3.26184500  | -3.09636400 | -0.70880400 |
| C  | 1.77037600  | -2.19019000 | 2.07326700  |

|    |             |             |             |
|----|-------------|-------------|-------------|
| C  | 3.99709300  | -1.64129600 | 2.60241300  |
| C  | 2.38230000  | -3.58988900 | -1.69566200 |
| C  | 4.14633100  | -4.09293800 | -0.22433000 |
| C  | 1.46310400  | -2.40844500 | 3.42982700  |
| F  | 0.69381600  | -2.43543800 | 1.19084000  |
| C  | 3.74262900  | -1.84366200 | 3.97546200  |
| F  | 5.31691300  | -1.29709800 | 2.30338600  |
| C  | 2.34809900  | -4.92513300 | -2.14860800 |
| F  | 1.44164700  | -2.75187900 | -2.33078600 |
| C  | 4.16469400  | -5.43480300 | -0.64652400 |
| F  | 5.11146500  | -3.75079900 | 0.72975100  |
| C  | 2.45965800  | -2.22534700 | 4.39969300  |
| F  | 0.17314100  | -2.78303400 | 3.81976900  |
| F  | 4.75134800  | -1.67195800 | 4.92007300  |
| C  | 3.24703600  | -5.86272900 | -1.62089600 |
| F  | 1.42017000  | -5.32137700 | -3.11566600 |
| F  | 5.07773600  | -6.34180500 | -0.11537900 |
| F  | 2.18036800  | -2.41550500 | 5.74954700  |
| F  | 3.23055900  | -7.18426700 | -2.05219800 |
| C  | 4.66307300  | -0.69263600 | -0.43512300 |
| C  | 5.59430000  | -1.01928000 | -1.44702200 |
| C  | 4.91609700  | 0.57340100  | 0.14624700  |
| C  | 6.68266700  | -0.20473900 | -1.82798300 |
| C  | 5.98012900  | 1.42542300  | -0.19415800 |
| C  | 6.88441500  | 1.03068700  | -1.19413700 |
| F  | 4.06007800  | 1.06775400  | 1.15250300  |
| F  | 6.14122600  | 2.65870600  | 0.44143500  |
| F  | 7.94549600  | 1.85346700  | -1.55717500 |
| F  | 7.55496300  | -0.61033000 | -2.83569300 |
| F  | 5.47483900  | -2.21144300 | -2.17822200 |
| H  | 3.63277200  | 5.37263300  | 0.79656300  |
| C  | 2.07372900  | 3.68802500  | 2.27538300  |
| H  | 1.25374600  | 3.91490400  | 2.97444500  |
| H  | 2.20112200  | 2.59731900  | 2.24905200  |
| H  | 2.99759300  | 4.11621700  | 2.68478900  |
| C  | -0.88205300 | 3.97760200  | -1.93031900 |
| H  | -0.92767400 | 2.88558800  | -2.06436300 |
| H  | -1.80510400 | 4.29099800  | -1.41686100 |
| H  | -0.88281100 | 4.43786300  | -2.92735700 |
| H  | 1.13262000  | 5.63919800  | -2.73591100 |
| Ti | -3.31027700 | -1.05327200 | -1.17877900 |
| C  | -2.36968000 | 0.57376500  | 0.14361600  |
| H  | -2.83715700 | 1.35007900  | -0.47111700 |
| H  | -1.34051900 | 0.26495200  | -0.05678200 |
| H  | -2.92757200 | 0.13350300  | 0.97547800  |
| C  | -2.69462900 | -2.75244900 | -0.16355100 |
| H  | -1.59641300 | -2.81673600 | -0.13610000 |
| H  | -3.08346800 | -2.61823200 | 0.86263000  |
| H  | -3.09225500 | -3.69050200 | -0.57940200 |
| O  | -5.02336100 | -0.89731100 | -0.68295600 |
| C  | -6.40302100 | -0.78201300 | -0.54930000 |
| C  | -7.06459000 | 0.39114300  | -1.02049600 |
| C  | -7.11449500 | -1.84385700 | 0.08663500  |
| C  | -8.46380600 | 0.48803200  | -0.83893700 |
| C  | -8.51308000 | -1.71036800 | 0.24372500  |
| C  | -9.17302100 | -0.55467100 | -0.21461900 |
| H  | -8.98746300 | 1.37700500  | -1.18887600 |



|    |              |             |             |
|----|--------------|-------------|-------------|
| H  | -9.07351800  | -2.51067500 | 0.72553400  |
| C  | -6.32204600  | 1.52107600  | -1.71420100 |
| H  | -5.42173500  | 1.82253100  | -1.15930900 |
| H  | -6.00014500  | 1.22809100  | -2.72582900 |
| H  | -6.96612400  | 2.40467600  | -1.81751300 |
| C  | -6.40896000  | -3.08983200 | 0.58921600  |
| H  | -5.89120800  | -3.61661700 | -0.22684100 |
| H  | -5.64845400  | -2.84444200 | 1.34580900  |
| H  | -7.12311100  | -3.78971800 | 1.04260200  |
| C  | -1.74047000  | -1.92030300 | -2.89524000 |
| C  | -3.07683900  | -2.29942000 | -3.25200500 |
| C  | -1.67034800  | -0.48888900 | -2.90719400 |
| C  | -3.83495000  | -1.10397000 | -3.50069800 |
| C  | -2.96487700  | 0.01824700  | -3.28208400 |
| C  | 2.08405100   | -0.55563100 | -0.68876200 |
| H  | 2.28052300   | -0.34095800 | -1.75157100 |
| H  | 1.08192500   | -0.99433900 | -0.61601800 |
| H  | 2.08412900   | 0.40476500  | -0.15087100 |
| H  | -0.78194000  | 0.09759100  | -2.69525300 |
| H  | -0.92441800  | -2.59112900 | -2.65582900 |
| H  | -3.44794700  | -3.31749200 | -3.32959500 |
| H  | -4.87514400  | -1.06239700 | -3.80919900 |
| H  | -3.23019700  | 1.06416100  | -3.40886400 |
| H  | -3.56513500  | 4.38647800  | 0.65173700  |
| H  | -1.77850700  | 5.07894700  | 2.56819300  |
| H  | -1.92670900  | 3.23024300  | 4.55482700  |
| H  | -3.79005600  | 1.39794700  | 3.86278800  |
| H  | -4.81594600  | 2.10846300  | 1.45769900  |
| Br | 3.76692400   | 6.81794200  | -1.85679300 |
| Br | -11.11461500 | -0.38965600 | 0.02531500  |

|                |          |          |          |
|----------------|----------|----------|----------|
| Frequencies -- | 5.0539   | 6.0002   | 7.6452   |
| Frequencies -- | 9.2315   | 10.3956  | 11.6453  |
| Frequencies -- | 15.7165  | 18.0156  | 21.1115  |
| Frequencies -- | 26.3450  | 28.8641  | 30.1494  |
| Frequencies -- | 33.3678  | 35.5978  | 37.3306  |
| Frequencies -- | 42.2810  | 44.4345  | 46.5576  |
| Frequencies -- | 48.2339  | 51.4268  | 56.2102  |
| Frequencies -- | 58.6042  | 62.7925  | 67.7905  |
| Frequencies -- | 81.6951  | 87.9650  | 93.7218  |
| Frequencies -- | 100.0958 | 107.8485 | 108.9126 |
| Frequencies -- | 111.5098 | 119.3265 | 123.5230 |
| Frequencies -- | 128.0828 | 133.0232 | 134.0055 |
| Frequencies -- | 140.3620 | 141.2496 | 146.1376 |
| Frequencies -- | 146.7045 | 151.0807 | 153.2795 |
| Frequencies -- | 153.7994 | 154.8824 | 156.8873 |
| Frequencies -- | 158.6304 | 160.0807 | 165.7789 |
| Frequencies -- | 166.7589 | 174.4060 | 182.1191 |
| Frequencies -- | 183.6936 | 189.1167 | 202.3132 |
| Frequencies -- | 202.6027 | 208.4891 | 213.1333 |
| Frequencies -- | 219.5420 | 220.4605 | 220.9867 |
| Frequencies -- | 222.1484 | 222.9626 | 224.2331 |
| Frequencies -- | 231.6475 | 233.4703 | 235.1497 |
| Frequencies -- | 243.8106 | 249.3334 | 253.4599 |
| Frequencies -- | 254.5113 | 258.2342 | 262.7025 |
| Frequencies -- | 263.9244 | 264.0286 | 264.9025 |
| Frequencies -- | 270.9190 | 274.3420 | 275.1055 |
| Frequencies -- | 275.6695 | 279.6605 | 292.0341 |
| Frequencies -- | 300.8134 | 306.1437 | 317.0562 |

|                |           |           |           |
|----------------|-----------|-----------|-----------|
| Frequencies -- | 322.4362  | 328.3217  | 334.4954  |
| Frequencies -- | 335.0848  | 337.9587  | 345.4095  |
| Frequencies -- | 353.3808  | 358.1726  | 365.2040  |
| Frequencies -- | 367.0902  | 377.9877  | 378.9322  |
| Frequencies -- | 379.7140  | 394.0705  | 394.3899  |
| Frequencies -- | 399.4234  | 428.2369  | 430.0719  |
| Frequencies -- | 431.7019  | 432.5924  | 434.2835  |
| Frequencies -- | 435.1756  | 454.8838  | 455.3028  |
| Frequencies -- | 469.2991  | 502.5934  | 502.7450  |
| Frequencies -- | 509.2476  | 510.3866  | 511.0788  |
| Frequencies -- | 520.4833  | 538.7444  | 541.1032  |
| Frequencies -- | 546.7020  | 548.0608  | 552.2978  |
| Frequencies -- | 561.3902  | 563.3806  | 564.8333  |
| Frequencies -- | 567.2261  | 568.4071  | 570.1488  |
| Frequencies -- | 573.9864  | 575.8766  | 577.2069  |
| Frequencies -- | 577.8173  | 583.1167  | 589.5147  |
| Frequencies -- | 593.9654  | 630.5342  | 634.8640  |
| Frequencies -- | 636.2553  | 637.4363  | 643.2877  |
| Frequencies -- | 661.0294  | 663.8185  | 673.0978  |
| Frequencies -- | 711.4759  | 712.3595  | 726.1686  |
| Frequencies -- | 731.1249  | 734.2667  | 741.0475  |
| Frequencies -- | 746.9667  | 763.5997  | 768.6049  |
| Frequencies -- | 786.3354  | 787.7123  | 799.4674  |
| Frequencies -- | 803.7026  | 804.6500  | 807.8287  |
| Frequencies -- | 811.6338  | 812.1501  | 823.8936  |
| Frequencies -- | 831.5950  | 833.7766  | 841.1629  |
| Frequencies -- | 841.7227  | 841.9552  | 844.5847  |
| Frequencies -- | 874.1715  | 876.2221  | 880.6199  |
| Frequencies -- | 883.4264  | 886.9389  | 892.8813  |
| Frequencies -- | 894.8585  | 896.2211  | 896.9917  |
| Frequencies -- | 905.1570  | 905.8485  | 919.8130  |
| Frequencies -- | 927.7034  | 938.4269  | 948.3426  |
| Frequencies -- | 949.6432  | 951.0537  | 981.1501  |
| Frequencies -- | 989.7447  | 1010.5757 | 1012.6295 |
| Frequencies -- | 1021.2675 | 1027.2368 | 1029.3123 |
| Frequencies -- | 1032.3140 | 1033.1594 | 1033.6694 |
| Frequencies -- | 1042.2758 | 1046.9729 | 1048.2678 |
| Frequencies -- | 1050.1392 | 1053.1887 | 1055.7760 |
| Frequencies -- | 1058.6595 | 1059.1470 | 1062.7213 |
| Frequencies -- | 1066.7154 | 1088.4579 | 1090.0787 |
| Frequencies -- | 1091.3422 | 1096.1136 | 1123.3981 |
| Frequencies -- | 1125.3779 | 1128.3880 | 1128.6515 |
| Frequencies -- | 1192.1443 | 1193.3500 | 1202.2095 |
| Frequencies -- | 1205.7527 | 1207.7818 | 1208.5568 |
| Frequencies -- | 1213.5795 | 1266.2741 | 1267.1856 |
| Frequencies -- | 1282.1261 | 1285.9006 | 1287.4011 |
| Frequencies -- | 1288.2471 | 1311.1584 | 1314.7100 |
| Frequencies -- | 1318.6117 | 1329.9629 | 1337.3871 |
| Frequencies -- | 1344.2287 | 1348.0533 | 1349.3097 |
| Frequencies -- | 1353.0908 | 1355.6690 | 1367.0653 |
| Frequencies -- | 1390.3263 | 1392.7755 | 1398.0262 |
| Frequencies -- | 1398.5759 | 1407.6472 | 1412.7582 |
| Frequencies -- | 1413.5408 | 1416.2636 | 1416.8124 |
| Frequencies -- | 1418.6033 | 1418.9253 | 1421.2822 |
| Frequencies -- | 1422.8573 | 1426.8136 | 1427.4419 |
| Frequencies -- | 1429.4279 | 1431.1146 | 1436.5851 |
| Frequencies -- | 1437.6453 | 1443.9666 | 1446.3590 |
| Frequencies -- | 1446.9993 | 1449.2885 | 1462.7343 |
| Frequencies -- | 1465.5588 | 1467.2517 | 1485.5003 |
| Frequencies -- | 1489.6863 | 1491.3140 | 1491.5946 |
| Frequencies -- | 1498.8974 | 1499.0674 | 1499.7569 |
| Frequencies -- | 1502.4753 | 1503.7074 | 1510.4277 |
| Frequencies -- | 1586.9114 | 1587.7301 | 1590.6832 |

|                |           |           |           |
|----------------|-----------|-----------|-----------|
| Frequencies -- | 1591.5166 | 1594.2213 | 1596.3854 |
| Frequencies -- | 1597.5298 | 1613.1248 | 1617.3986 |
| Frequencies -- | 1619.3834 | 2987.1673 | 2991.6385 |
| Frequencies -- | 3012.6988 | 3014.2862 | 3022.2072 |
| Frequencies -- | 3023.8637 | 3025.5405 | 3027.4156 |
| Frequencies -- | 3098.2585 | 3104.8470 | 3107.1305 |
| Frequencies -- | 3107.9449 | 3112.7490 | 3116.0179 |
| Frequencies -- | 3120.0721 | 3131.0268 | 3134.4486 |
| Frequencies -- | 3135.6800 | 3136.5956 | 3140.6237 |
| Frequencies -- | 3142.6446 | 3149.3831 | 3199.5907 |
| Frequencies -- | 3200.9183 | 3203.1922 | 3208.4348 |
| Frequencies -- | 3218.4875 | 3231.3175 | 3236.8469 |
| Frequencies -- | 3238.8412 | 3241.3844 | 3245.2823 |
| Frequencies -- | 3254.9373 | 3259.5502 | 3261.5081 |
| Frequencies -- | 3267.3470 | 3277.9420 | 3296.6154 |

**conformation 2**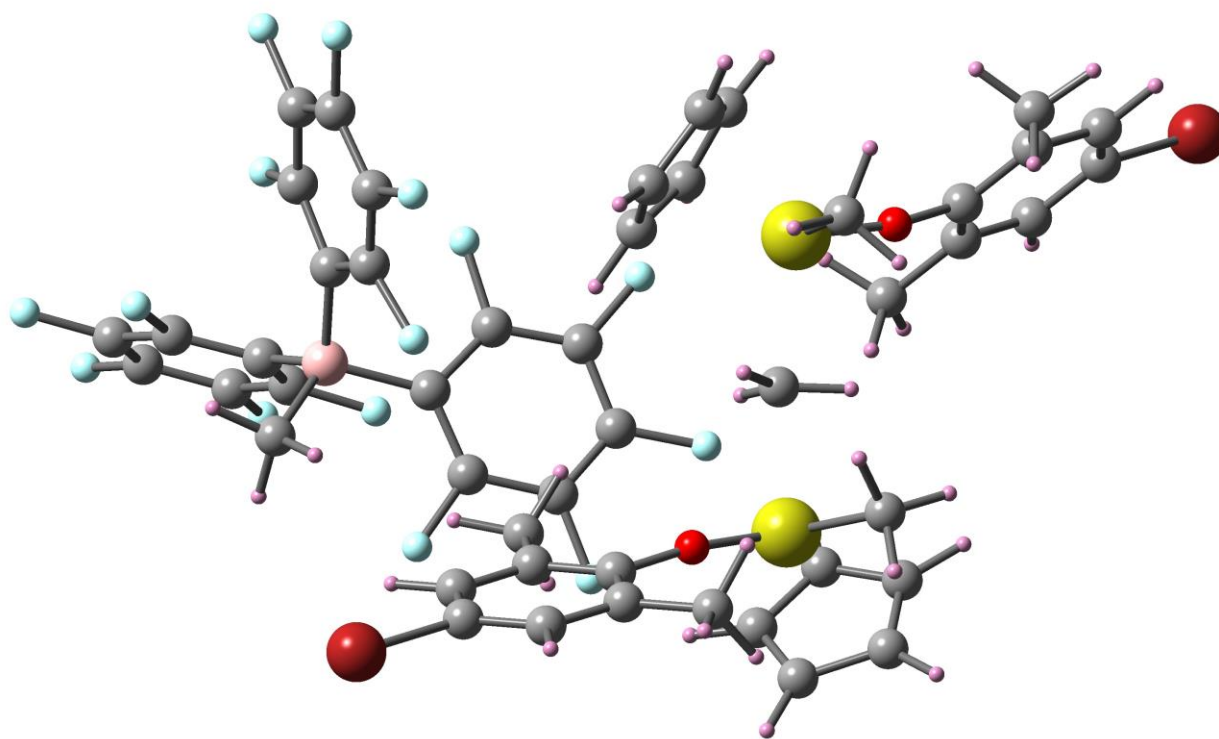

| <b>vacuum</b> | <b>toluene-like solvent</b> | <b>D3 dispersion</b> |
|---------------|-----------------------------|----------------------|
| -3666.4031326 | -3666.425317                | -0.73244489          |

|    |             |            |             |
|----|-------------|------------|-------------|
| Ti | -2.68579700 | 3.38256600 | -1.34827900 |
| C  | -4.35557000 | 4.38064700 | -0.57027100 |
| H  | -4.15596900 | 4.44178300 | 0.51583200  |
| H  | -4.43967800 | 5.40430700 | -0.96720000 |
| H  | -5.30435800 | 3.85245700 | -0.75137100 |
| O  | -1.35829000 | 4.36930200 | -0.70016200 |
| C  | -0.24244600 | 5.15626400 | -0.41198600 |
| C  | 1.05628300  | 4.56878100 | -0.46421300 |
| C  | -0.44638400 | 6.52200100 | -0.05313200 |
| C  | 2.16590700  | 5.38506000 | -0.14395900 |

|    |             |             |             |
|----|-------------|-------------|-------------|
| C  | 0.68985300  | 7.30398400  | 0.25313500  |
| C  | 1.97732200  | 6.73501700  | 0.20575000  |
| C  | -1.83970500 | 2.69288200  | -3.46244000 |
| C  | -2.87641000 | 1.73797600  | -3.18068200 |
| C  | -2.45498400 | 3.98228200  | -3.61166500 |
| C  | -4.12942500 | 2.43439500  | -3.15922500 |
| C  | -3.87322700 | 3.81990000  | -3.42560400 |
| B  | 4.27427400  | -1.40728900 | -0.30717400 |
| C  | 2.80385300  | -1.47351000 | -1.12378100 |
| C  | 5.34030000  | -2.57376300 | -0.84793000 |
| C  | 2.40369900  | -0.59135400 | -2.15439100 |
| C  | 1.79797400  | -2.41069300 | -0.78024600 |
| C  | 6.63357200  | -2.69990100 | -0.27895100 |
| C  | 5.15680900  | -3.41209800 | -1.97001900 |
| C  | 1.12633200  | -0.59396700 | -2.75266400 |
| F  | 3.27231800  | 0.37522300  | -2.67416100 |
| C  | 0.51017900  | -2.45220500 | -1.34592300 |
| F  | 2.05508100  | -3.39973600 | 0.17579100  |
| C  | 7.63877300  | -3.56469100 | -0.74677100 |
| F  | 6.97669800  | -1.94432300 | 0.85259900  |
| C  | 6.13141400  | -4.29359100 | -2.48449200 |
| F  | 3.94101400  | -3.41779600 | -2.67947200 |
| C  | 0.16378400  | -1.52331100 | -2.33807800 |
| F  | 0.78973400  | 0.34678300  | -3.73555700 |
| F  | -0.44570700 | -3.38309300 | -0.91546800 |
| C  | 7.38780100  | -4.37454300 | -1.86755400 |
| F  | 8.87844100  | -3.63021700 | -0.11380200 |
| F  | 5.85781300  | -5.08356800 | -3.60042900 |
| F  | -1.12641200 | -1.50807200 | -2.88533600 |
| F  | 8.36603100  | -5.23480400 | -2.35546900 |
| C  | 3.89241400  | -1.52929600 | 1.32695200  |
| C  | 4.24424100  | -2.57790300 | 2.21112200  |
| C  | 3.16476700  | -0.50139100 | 1.97032900  |
| C  | 3.98563700  | -2.57625100 | 3.59815800  |
| C  | 2.87050900  | -0.45346700 | 3.34525700  |
| C  | 3.29830400  | -1.49814000 | 4.17852900  |
| F  | 2.61263200  | 0.56297800  | 1.21752800  |
| F  | 2.13670000  | 0.61035700  | 3.88524000  |
| F  | 3.02268000  | -1.47587600 | 5.54262800  |
| F  | 4.38409800  | -3.64331600 | 4.39930700  |
| F  | 4.85690200  | -3.73979600 | 1.73450000  |
| H  | 0.55936900  | 8.34958200  | 0.52984200  |
| C  | -1.83091500 | 7.14204300  | 0.00601200  |
| H  | -2.32036500 | 7.13124500  | -0.98105800 |
| H  | -2.48705100 | 6.59756400  | 0.70089300  |
| H  | -1.77679800 | 8.18666000  | 0.34017900  |
| C  | 1.27695200  | 3.12067500  | -0.85544300 |
| H  | 0.60772200  | 2.44400200  | -0.30473500 |
| H  | 1.10043600  | 2.96670900  | -1.93093200 |
| H  | 2.30520100  | 2.80607800  | -0.64461200 |
| H  | 3.16615700  | 4.95464100  | -0.17023000 |
| Ti | -3.38162900 | 0.12947800  | 1.80329300  |
| C  | -2.81713200 | 1.59756300  | 0.09901100  |
| H  | -2.13461000 | 0.91832300  | -0.41665600 |
| H  | -2.43019800 | 2.24861000  | 0.88888100  |
| H  | -3.88336800 | 1.57662700  | -0.14619800 |
| C  | -4.35008800 | 1.54771300  | 2.99937800  |

|    |             |             |             |
|----|-------------|-------------|-------------|
| H  | -3.66866400 | 2.30615300  | 3.41446800  |
| H  | -5.08214400 | 2.02414800  | 2.32010700  |
| H  | -4.89951800 | 1.07718100  | 3.82923800  |
| O  | -4.76795700 | -0.76772200 | 1.13306100  |
| C  | -5.73056400 | -1.68410300 | 0.71304000  |
| C  | -5.48579700 | -2.46683700 | -0.45405200 |
| C  | -6.94225300 | -1.79138700 | 1.45866100  |
| C  | -6.48951200 | -3.37342400 | -0.86738300 |
| C  | -7.91727600 | -2.71310700 | 1.01417700  |
| C  | -7.68583300 | -3.49123600 | -0.13604900 |
| H  | -6.32449500 | -3.98143800 | -1.75591400 |
| H  | -8.84912700 | -2.81348800 | 1.56941600  |
| C  | -4.19583300 | -2.35874600 | -1.24484800 |
| H  | -3.93165100 | -1.31242800 | -1.45364400 |
| H  | -3.34905100 | -2.80853700 | -0.70527000 |
| H  | -4.27749600 | -2.88091500 | -2.20697400 |
| C  | -7.20244300 | -0.95017200 | 2.69541300  |
| H  | -6.45069800 | -1.13881500 | 3.47801500  |
| H  | -7.16786100 | 0.12502900  | 2.46427500  |
| H  | -8.19032300 | -1.17372800 | 3.11943000  |
| C  | -1.38165800 | 0.38169300  | 3.27820500  |
| C  | -2.35402000 | -0.44980600 | 3.92400800  |
| C  | -0.97095400 | -0.27013900 | 2.07073000  |
| C  | -2.54314500 | -1.62579000 | 3.11542300  |
| C  | -1.68771200 | -1.51294200 | 1.96695300  |
| C  | 5.06811800  | 0.03175700  | -0.52253000 |
| H  | 5.89270500  | 0.11423000  | 0.19996700  |
| H  | 5.50515700  | 0.09808400  | -1.53018200 |
| H  | 4.42009500  | 0.90768400  | -0.38499300 |
| H  | -0.21773300 | 0.09475700  | 1.37997000  |
| H  | -1.01164200 | 1.33460400  | 3.64495000  |
| H  | -2.84573400 | -0.23806400 | 4.86793700  |
| H  | -3.19042900 | -2.46720900 | 3.34621800  |
| H  | -1.56513200 | -2.25854100 | 1.18897900  |
| H  | -0.78604300 | 2.46526500  | -3.57992700 |
| H  | -1.94123700 | 4.90908400  | -3.85132900 |
| H  | -4.61874200 | 4.60625200  | -3.48432500 |
| H  | -5.10467600 | 1.99416200  | -2.96876300 |
| H  | -2.72669000 | 0.67233600  | -3.04099500 |
| Br | 3.53439800  | 7.84569600  | 0.64278600  |
| Br | -9.05996000 | -4.76013600 | -0.73272300 |

|                |          |          |          |
|----------------|----------|----------|----------|
| Frequencies -- | 2.7132   | 5.5796   | 7.4307   |
| Frequencies -- | 11.3684  | 12.3285  | 17.5517  |
| Frequencies -- | 19.2684  | 20.7969  | 22.2446  |
| Frequencies -- | 24.9496  | 27.5316  | 30.5521  |
| Frequencies -- | 32.6635  | 36.8304  | 38.3036  |
| Frequencies -- | 40.9269  | 42.5749  | 44.9187  |
| Frequencies -- | 47.1750  | 50.5993  | 53.1324  |
| Frequencies -- | 56.9109  | 64.2783  | 66.6687  |
| Frequencies -- | 78.1454  | 91.8708  | 96.6323  |
| Frequencies -- | 100.6229 | 105.9069 | 109.4772 |
| Frequencies -- | 110.6461 | 119.7449 | 119.8251 |
| Frequencies -- | 123.4278 | 128.0448 | 134.3913 |
| Frequencies -- | 137.9085 | 141.9859 | 144.5871 |
| Frequencies -- | 146.3537 | 148.2399 | 152.2147 |
| Frequencies -- | 154.4375 | 155.3803 | 158.7292 |
| Frequencies -- | 160.9379 | 165.1436 | 165.8069 |

|                |           |           |           |
|----------------|-----------|-----------|-----------|
| Frequencies -- | 169.6690  | 180.8848  | 183.3919  |
| Frequencies -- | 190.1848  | 194.1092  | 206.3958  |
| Frequencies -- | 208.6002  | 212.9436  | 216.4033  |
| Frequencies -- | 216.7757  | 217.5043  | 221.1238  |
| Frequencies -- | 222.1495  | 229.5811  | 233.3536  |
| Frequencies -- | 234.8258  | 237.0792  | 239.4043  |
| Frequencies -- | 248.3970  | 254.2187  | 254.3897  |
| Frequencies -- | 256.1599  | 261.1569  | 261.4188  |
| Frequencies -- | 264.0937  | 264.7173  | 266.0111  |
| Frequencies -- | 270.8577  | 274.6092  | 274.7368  |
| Frequencies -- | 275.0097  | 279.1559  | 297.5827  |
| Frequencies -- | 302.6216  | 306.5626  | 310.2880  |
| Frequencies -- | 320.5635  | 328.9482  | 330.4532  |
| Frequencies -- | 335.8204  | 336.5264  | 342.5741  |
| Frequencies -- | 349.9917  | 360.0738  | 363.9056  |
| Frequencies -- | 369.8652  | 373.2149  | 376.3265  |
| Frequencies -- | 379.5755  | 389.4789  | 397.2141  |
| Frequencies -- | 400.1117  | 429.4391  | 430.2882  |
| Frequencies -- | 431.4251  | 432.4573  | 434.2139  |
| Frequencies -- | 435.6991  | 454.2579  | 454.9387  |
| Frequencies -- | 468.2134  | 501.3296  | 502.4098  |
| Frequencies -- | 507.2123  | 510.4094  | 510.6622  |
| Frequencies -- | 514.7148  | 537.9636  | 540.2825  |
| Frequencies -- | 546.1614  | 547.3158  | 553.5580  |
| Frequencies -- | 559.1325  | 563.2139  | 564.3568  |
| Frequencies -- | 565.3712  | 568.8488  | 569.5846  |
| Frequencies -- | 569.9211  | 574.2457  | 575.9051  |
| Frequencies -- | 577.9082  | 583.4787  | 586.0189  |
| Frequencies -- | 601.8097  | 627.8393  | 634.9114  |
| Frequencies -- | 637.7396  | 639.6936  | 644.6296  |
| Frequencies -- | 654.4615  | 676.2422  | 679.7518  |
| Frequencies -- | 706.2064  | 712.5983  | 725.2123  |
| Frequencies -- | 730.0376  | 731.6169  | 742.8319  |
| Frequencies -- | 751.0210  | 757.6744  | 765.8887  |
| Frequencies -- | 784.2445  | 788.8485  | 789.8727  |
| Frequencies -- | 801.1492  | 805.4953  | 808.0216  |
| Frequencies -- | 810.9242  | 812.4575  | 814.2316  |
| Frequencies -- | 820.3521  | 829.3441  | 837.1930  |
| Frequencies -- | 838.9211  | 841.1678  | 841.8644  |
| Frequencies -- | 867.5082  | 875.6287  | 880.4117  |
| Frequencies -- | 886.5938  | 887.6322  | 891.0586  |
| Frequencies -- | 892.2011  | 893.5176  | 896.3171  |
| Frequencies -- | 897.8739  | 905.0006  | 905.7437  |
| Frequencies -- | 932.0500  | 938.3494  | 945.4544  |
| Frequencies -- | 950.4346  | 952.0942  | 978.8701  |
| Frequencies -- | 983.1276  | 1009.1545 | 1010.5494 |
| Frequencies -- | 1013.8917 | 1028.3428 | 1029.8017 |
| Frequencies -- | 1031.0972 | 1033.2172 | 1034.2440 |
| Frequencies -- | 1039.4224 | 1042.0962 | 1049.2309 |
| Frequencies -- | 1050.0677 | 1051.3362 | 1053.3730 |
| Frequencies -- | 1057.0304 | 1057.4765 | 1058.6388 |
| Frequencies -- | 1059.0757 | 1088.5876 | 1089.7200 |
| Frequencies -- | 1095.4980 | 1095.8540 | 1122.2701 |
| Frequencies -- | 1124.3829 | 1128.0748 | 1128.8600 |
| Frequencies -- | 1182.5510 | 1186.9167 | 1188.9047 |
| Frequencies -- | 1201.4605 | 1204.2014 | 1208.1885 |
| Frequencies -- | 1208.4956 | 1265.3790 | 1267.5121 |
| Frequencies -- | 1284.2734 | 1285.5068 | 1287.3905 |
| Frequencies -- | 1287.9078 | 1310.7248 | 1313.9118 |
| Frequencies -- | 1319.2113 | 1338.5904 | 1343.9353 |
| Frequencies -- | 1345.9624 | 1346.9396 | 1349.7052 |
| Frequencies -- | 1353.8870 | 1354.7962 | 1372.8003 |
| Frequencies -- | 1390.2699 | 1390.5229 | 1398.1434 |

|                |           |           |           |
|----------------|-----------|-----------|-----------|
| Frequencies -- | 1399.2013 | 1409.0163 | 1412.4479 |
| Frequencies -- | 1413.7620 | 1414.8268 | 1417.3699 |
| Frequencies -- | 1420.9220 | 1424.1483 | 1424.5479 |
| Frequencies -- | 1424.6704 | 1428.8009 | 1429.4583 |
| Frequencies -- | 1431.2754 | 1434.5776 | 1443.7099 |
| Frequencies -- | 1444.3051 | 1444.6480 | 1445.8484 |
| Frequencies -- | 1448.5655 | 1449.5510 | 1454.4008 |
| Frequencies -- | 1462.2178 | 1466.5244 | 1486.5146 |
| Frequencies -- | 1488.6441 | 1489.6065 | 1493.2117 |
| Frequencies -- | 1498.9137 | 1499.5603 | 1501.5178 |
| Frequencies -- | 1502.1036 | 1504.7394 | 1513.0085 |
| Frequencies -- | 1586.8864 | 1587.4953 | 1590.2160 |
| Frequencies -- | 1590.9650 | 1594.2622 | 1597.3272 |
| Frequencies -- | 1600.2946 | 1607.9997 | 1614.5853 |
| Frequencies -- | 1618.2338 | 2979.0013 | 2981.2886 |
| Frequencies -- | 3018.0568 | 3019.0481 | 3025.5743 |
| Frequencies -- | 3026.9146 | 3030.8002 | 3032.6837 |
| Frequencies -- | 3100.8447 | 3101.7100 | 3106.2321 |
| Frequencies -- | 3106.4189 | 3115.1282 | 3122.1348 |
| Frequencies -- | 3125.2089 | 3127.1276 | 3129.8595 |
| Frequencies -- | 3137.0179 | 3137.5537 | 3137.7669 |
| Frequencies -- | 3143.6757 | 3162.9933 | 3198.9780 |
| Frequencies -- | 3201.5733 | 3205.1759 | 3205.7392 |
| Frequencies -- | 3222.2752 | 3233.7431 | 3237.6569 |
| Frequencies -- | 3241.9343 | 3243.7492 | 3246.9571 |
| Frequencies -- | 3262.3448 | 3264.6536 | 3267.8862 |
| Frequencies -- | 3268.3514 | 3283.9759 | 3287.1622 |

**Catalyst 1 Double Activation Product:**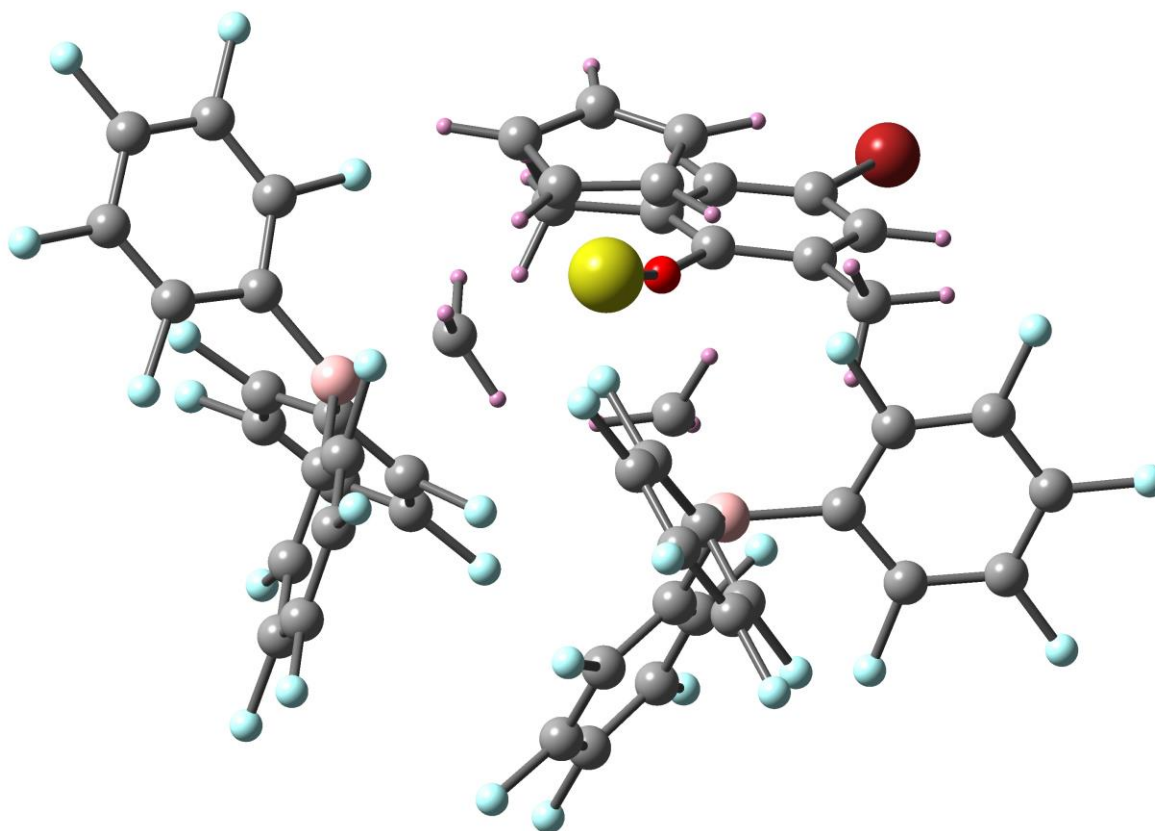

| <b>vacuum</b> | <b>toluene-like solvent</b> | <b>D3 dispersion</b> |
|---------------|-----------------------------|----------------------|
| -5144.7990126 | -5144.8102725               | -0.78388588          |

|   |             |             |             |
|---|-------------|-------------|-------------|
| C | -2.45882300 | -1.03443800 | 1.59000600  |
| C | -2.05647100 | -2.25898100 | 2.17393800  |
| C | -2.21341300 | 0.08131500  | 2.42763900  |
| C | -1.53214900 | -2.38015400 | 3.47782500  |
| C | -1.70013500 | 0.01967800  | 3.73185000  |
| C | -1.36205400 | -1.23395800 | 4.27147100  |
| C | -3.48853300 | -2.26892300 | -0.68936800 |
| C | -4.59955100 | -3.00657900 | -0.20866000 |
| C | -2.89304400 | -2.85702500 | -1.82291700 |
| C | -5.08146800 | -4.19637700 | -0.78209000 |
| C | -3.33438100 | -4.04194800 | -2.44423100 |
| C | -4.44382100 | -4.72250700 | -1.91953600 |
| C | -4.40500500 | 0.13823400  | -0.05914800 |
| C | -5.28628700 | 0.47057500  | 1.00137400  |
| C | -4.83525000 | 0.65065500  | -1.30504800 |
| C | -6.45115500 | 1.25190700  | 0.84957500  |
| C | -5.98041500 | 1.43984300  | -1.51223900 |
| C | -6.80265700 | 1.74878900  | -0.41656600 |
| C | -1.70543900 | -0.04083600 | -0.73167300 |
| H | -2.11047700 | 0.16103000  | -1.73065700 |
| H | -1.55774000 | 0.81970400  | -0.07371100 |



|    |             |             |             |
|----|-------------|-------------|-------------|
| H  | -0.92913300 | -0.81718300 | -0.70016700 |
| F  | -7.93716700 | 2.52557800  | -0.58379600 |
| F  | -7.25763600 | 1.53275800  | 1.94244300  |
| F  | -5.05385900 | 0.01317500  | 2.29617900  |
| F  | -6.29777000 | 1.91448700  | -2.78077200 |
| F  | -4.09182300 | 0.37180900  | -2.47718900 |
| F  | -5.26961700 | -2.56498300 | 0.93585300  |
| F  | -6.17382900 | -4.85499400 | -0.23658900 |
| F  | -4.90150800 | -5.88834400 | -2.50978500 |
| F  | -2.68407100 | -4.53306800 | -3.56968200 |
| F  | -1.76187400 | -2.26552200 | -2.42863700 |
| F  | -2.13403900 | -3.45750100 | 1.45311600  |
| F  | -1.16331200 | -3.62283200 | 3.97386300  |
| F  | -0.84395000 | -1.33190600 | 5.55000300  |
| F  | -1.51248000 | 1.17198800  | 4.47978500  |
| F  | -2.48375600 | 1.37701500  | 1.94125000  |
| B  | -3.06377500 | -0.84797300 | 0.05999700  |
| F  | 6.75385400  | -3.73690800 | -2.37964500 |
| C  | 6.09906500  | -2.52000700 | -2.27065800 |
| C  | 5.09731000  | -2.33056700 | -1.29614600 |
| C  | 6.44391300  | -1.46543000 | -3.13188100 |
| C  | 4.37459800  | -1.12499300 | -1.11417900 |
| F  | 4.87808300  | -3.42678100 | -0.45966700 |
| C  | 5.78493200  | -0.23400100 | -2.98362000 |
| F  | 7.41976900  | -1.62999400 | -4.09934700 |
| B  | 3.19679300  | -0.91624700 | 0.03661100  |
| C  | 4.79716300  | -0.10102200 | -1.99249300 |
| F  | 6.11488100  | 0.83839600  | -3.80537000 |
| C  | 3.68365000  | 0.04374600  | 1.29768300  |
| C  | 2.53006400  | -2.35567400 | 0.51536400  |
| C  | 1.84099600  | -0.02363000 | -0.74237200 |
| F  | 4.24482700  | 1.19886200  | -1.88468600 |
| C  | 5.02755500  | 0.39498300  | 1.57485800  |
| C  | 2.77332900  | 0.58042200  | 2.24039100  |
| C  | 2.65699200  | -2.92046900 | 1.80802000  |
| C  | 1.80019000  | -3.18149100 | -0.37304800 |
| H  | 2.33808000  | 0.91060600  | -1.02655800 |
| H  | 1.62729000  | -0.73725400 | -1.54232700 |
| H  | 1.13090900  | 0.04298400  | 0.08718200  |
| C  | 5.42941600  | 1.21594400  | 2.64943100  |
| F  | 6.07524200  | -0.09413000 | 0.78904100  |
| C  | 3.11670600  | 1.40202100  | 3.32713400  |
| F  | 1.40110000  | 0.25904200  | 2.15109300  |
| C  | 2.08995700  | -4.15195400 | 2.19546300  |
| F  | 3.41470200  | -2.28236700 | 2.79403400  |
| C  | 1.20914800  | -4.41169700 | -0.04086900 |
| F  | 1.66305600  | -2.79914000 | -1.72900400 |
| C  | 4.46759700  | 1.73081400  | 3.53346700  |
| F  | 6.77051200  | 1.51346900  | 2.84388800  |
| F  | 2.14332300  | 1.87909200  | 4.19332400  |
| C  | 1.35167100  | -4.90495200 | 1.26705100  |
| F  | 2.26527900  | -4.63091100 | 3.48334800  |
| F  | 0.49793800  | -5.13657900 | -0.98690700 |
| F  | 4.84175900  | 2.54175100  | 4.59062400  |
| F  | 0.78516800  | -6.11209500 | 1.62838000  |
| Ti | 0.09023500  | 1.06080000  | -1.81209100 |
| O  | 0.05350100  | 2.63731100  | -1.02269200 |

|    |             |             |             |
|----|-------------|-------------|-------------|
| C  | 0.00715600  | 4.01597100  | -0.78313100 |
| C  | 1.23277200  | 4.71639100  | -0.56837900 |
| C  | -1.26689600 | 4.65861600  | -0.73253300 |
| C  | 1.15923000  | 6.10661800  | -0.33013800 |
| C  | 2.58123500  | 4.02166700  | -0.56311000 |
| C  | -1.28843400 | 6.05028700  | -0.49183700 |
| C  | -2.57362800 | 3.90256400  | -0.88102500 |
| C  | -0.08770300 | 6.76148600  | -0.30031600 |
| H  | 2.07859100  | 6.66575800  | -0.16188900 |
| H  | 2.61987100  | 3.23629600  | 0.20525000  |
| H  | 2.81541300  | 3.55145900  | -1.52907800 |
| H  | 3.38557600  | 4.73604800  | -0.34612400 |
| H  | -2.24655500 | 6.56622600  | -0.44536300 |
| H  | -2.59770100 | 3.27659200  | -1.78396400 |
| H  | -2.74353300 | 3.24652500  | -0.01483600 |
| H  | -3.41973300 | 4.59909500  | -0.94008800 |
| Br | -0.15295300 | 8.68841800  | 0.02470700  |
| C  | -0.55692200 | 1.92791700  | -3.89240700 |
| C  | 0.87828200  | 1.95687900  | -3.83458300 |
| C  | -0.97022900 | 0.54840600  | -3.94376700 |
| H  | -1.20942700 | 2.79466200  | -3.93297600 |
| C  | 1.34595500  | 0.59590600  | -3.84611700 |
| H  | 1.49868700  | 2.84772900  | -3.82044600 |
| C  | 0.20457400  | -0.27277800 | -3.90298000 |
| H  | -1.99217000 | 0.19093100  | -4.00513200 |
| H  | 2.38414700  | 0.28532700  | -3.82131000 |
| H  | 0.22022700  | -1.35789400 | -3.90725700 |

|                |          |          |          |
|----------------|----------|----------|----------|
| Frequencies -- | 1.1185   | 8.3234   | 9.5474   |
| Frequencies -- | 12.2604  | 14.5966  | 18.9193  |
| Frequencies -- | 21.1826  | 23.5112  | 25.8969  |
| Frequencies -- | 27.8519  | 29.6668  | 30.0374  |
| Frequencies -- | 31.2941  | 32.5670  | 35.9047  |
| Frequencies -- | 38.6313  | 40.5588  | 43.4686  |
| Frequencies -- | 45.5167  | 46.8899  | 47.8336  |
| Frequencies -- | 52.9211  | 54.6937  | 66.4841  |
| Frequencies -- | 79.0523  | 88.6461  | 94.4767  |
| Frequencies -- | 99.8745  | 103.9273 | 106.3049 |
| Frequencies -- | 108.5610 | 111.3157 | 113.8594 |
| Frequencies -- | 117.5593 | 119.1476 | 120.8391 |
| Frequencies -- | 123.2964 | 125.5105 | 128.6637 |
| Frequencies -- | 129.6659 | 137.2732 | 142.1951 |
| Frequencies -- | 146.8475 | 149.2684 | 150.2057 |
| Frequencies -- | 153.4382 | 154.3828 | 155.0901 |
| Frequencies -- | 156.4898 | 158.1476 | 159.5002 |
| Frequencies -- | 161.1236 | 162.5431 | 162.9441 |
| Frequencies -- | 166.2859 | 171.2292 | 186.7240 |
| Frequencies -- | 201.2451 | 216.3969 | 216.8480 |
| Frequencies -- | 217.9946 | 219.6848 | 220.0925 |
| Frequencies -- | 221.6526 | 224.6952 | 241.7511 |
| Frequencies -- | 249.8743 | 259.0065 | 261.4577 |
| Frequencies -- | 263.9878 | 264.6053 | 264.9107 |
| Frequencies -- | 264.9851 | 265.1397 | 265.4468 |
| Frequencies -- | 266.8177 | 270.0536 | 273.0191 |
| Frequencies -- | 273.9775 | 274.4992 | 275.4595 |
| Frequencies -- | 276.6508 | 280.9669 | 289.4328 |
| Frequencies -- | 292.1210 | 296.1951 | 299.4852 |
| Frequencies -- | 301.6740 | 307.1097 | 309.8954 |
| Frequencies -- | 319.6123 | 320.3640 | 322.5144 |
| Frequencies -- | 327.9375 | 330.6187 | 334.7667 |

|                |           |           |           |
|----------------|-----------|-----------|-----------|
| Frequencies -- | 341.3537  | 344.0766  | 348.0039  |
| Frequencies -- | 356.6650  | 360.4635  | 364.8571  |
| Frequencies -- | 366.0194  | 373.8916  | 378.2639  |
| Frequencies -- | 379.3964  | 379.5866  | 380.2888  |
| Frequencies -- | 381.6670  | 382.9039  | 389.2276  |
| Frequencies -- | 392.6131  | 403.6272  | 415.1293  |
| Frequencies -- | 430.8956  | 431.2017  | 432.0419  |
| Frequencies -- | 432.6581  | 432.8226  | 433.5878  |
| Frequencies -- | 445.3729  | 452.6389  | 457.0514  |
| Frequencies -- | 457.2311  | 457.8687  | 458.2748  |
| Frequencies -- | 459.3730  | 469.7979  | 479.8834  |
| Frequencies -- | 502.9676  | 510.2412  | 530.9461  |
| Frequencies -- | 541.0921  | 541.5534  | 542.3775  |
| Frequencies -- | 543.5527  | 548.1885  | 549.7112  |
| Frequencies -- | 553.5091  | 561.0126  | 565.9849  |
| Frequencies -- | 573.4353  | 574.7391  | 591.3374  |
| Frequencies -- | 597.3804  | 598.5959  | 601.8054  |
| Frequencies -- | 606.6455  | 635.4884  | 636.3643  |
| Frequencies -- | 639.2811  | 639.7971  | 640.8289  |
| Frequencies -- | 642.2997  | 648.8072  | 652.7168  |
| Frequencies -- | 654.2933  | 660.8983  | 664.1755  |
| Frequencies -- | 679.6596  | 718.8192  | 724.1137  |
| Frequencies -- | 727.5158  | 730.2496  | 731.9704  |
| Frequencies -- | 732.5308  | 734.9109  | 751.0973  |
| Frequencies -- | 757.3463  | 759.0972  | 759.7388  |
| Frequencies -- | 763.5707  | 766.9459  | 795.7201  |
| Frequencies -- | 803.3938  | 808.5467  | 813.1455  |
| Frequencies -- | 823.0324  | 837.1199  | 841.0675  |
| Frequencies -- | 846.2857  | 861.4728  | 874.5004  |
| Frequencies -- | 879.7359  | 884.1867  | 890.2181  |
| Frequencies -- | 890.9972  | 894.4877  | 902.6778  |
| Frequencies -- | 903.4721  | 908.9475  | 913.2883  |
| Frequencies -- | 915.9613  | 916.8021  | 924.2116  |
| Frequencies -- | 929.6124  | 951.1795  | 953.5660  |
| Frequencies -- | 988.8689  | 1011.5492 | 1013.4457 |
| Frequencies -- | 1022.6909 | 1028.4409 | 1030.1176 |
| Frequencies -- | 1032.2310 | 1033.0543 | 1034.8815 |
| Frequencies -- | 1038.9459 | 1049.1955 | 1049.7744 |
| Frequencies -- | 1051.4806 | 1052.8173 | 1053.9561 |
| Frequencies -- | 1056.4952 | 1058.5438 | 1058.7286 |
| Frequencies -- | 1061.5239 | 1072.2699 | 1079.5436 |
| Frequencies -- | 1092.9883 | 1094.2819 | 1096.0098 |
| Frequencies -- | 1104.6107 | 1119.2570 | 1127.2363 |
| Frequencies -- | 1178.2171 | 1217.4429 | 1219.7200 |
| Frequencies -- | 1220.4045 | 1221.8113 | 1222.3808 |
| Frequencies -- | 1223.0998 | 1269.9279 | 1283.8372 |
| Frequencies -- | 1287.8742 | 1318.2932 | 1318.6707 |
| Frequencies -- | 1320.3782 | 1320.6228 | 1325.1027 |
| Frequencies -- | 1326.0051 | 1336.7064 | 1337.9142 |
| Frequencies -- | 1340.3925 | 1342.1937 | 1345.1122 |
| Frequencies -- | 1350.5022 | 1355.2295 | 1384.9625 |
| Frequencies -- | 1396.5806 | 1407.4945 | 1410.4763 |
| Frequencies -- | 1413.8789 | 1414.4634 | 1417.0293 |
| Frequencies -- | 1418.8428 | 1419.5042 | 1422.8931 |
| Frequencies -- | 1423.7555 | 1425.5469 | 1427.6403 |
| Frequencies -- | 1430.8611 | 1431.9956 | 1435.9929 |
| Frequencies -- | 1442.9190 | 1448.4430 | 1470.3027 |
| Frequencies -- | 1471.0246 | 1471.8078 | 1472.6022 |
| Frequencies -- | 1473.3532 | 1474.3815 | 1493.3556 |
| Frequencies -- | 1494.8930 | 1504.3305 | 1505.4354 |
| Frequencies -- | 1579.4390 | 1588.6270 | 1590.6510 |
| Frequencies -- | 1591.2719 | 1593.0316 | 1593.5175 |
| Frequencies -- | 1594.0861 | 1596.5798 | 1620.0278 |

|                |           |           |           |
|----------------|-----------|-----------|-----------|
| Frequencies -- | 1620.5286 | 1621.2529 | 1621.9409 |
| Frequencies -- | 1622.9272 | 1625.3611 | 2999.9813 |
| Frequencies -- | 3012.9334 | 3034.0113 | 3034.8722 |
| Frequencies -- | 3124.0412 | 3126.8309 | 3145.3489 |
| Frequencies -- | 3145.6259 | 3157.3724 | 3187.0171 |
| Frequencies -- | 3195.9037 | 3203.1941 | 3204.6075 |
| Frequencies -- | 3207.2919 | 3251.1677 | 3262.2904 |
| Frequencies -- | 3268.0331 | 3281.5488 | 3293.5735 |

**Catalyst 15 proximal to distal conformation transition state:**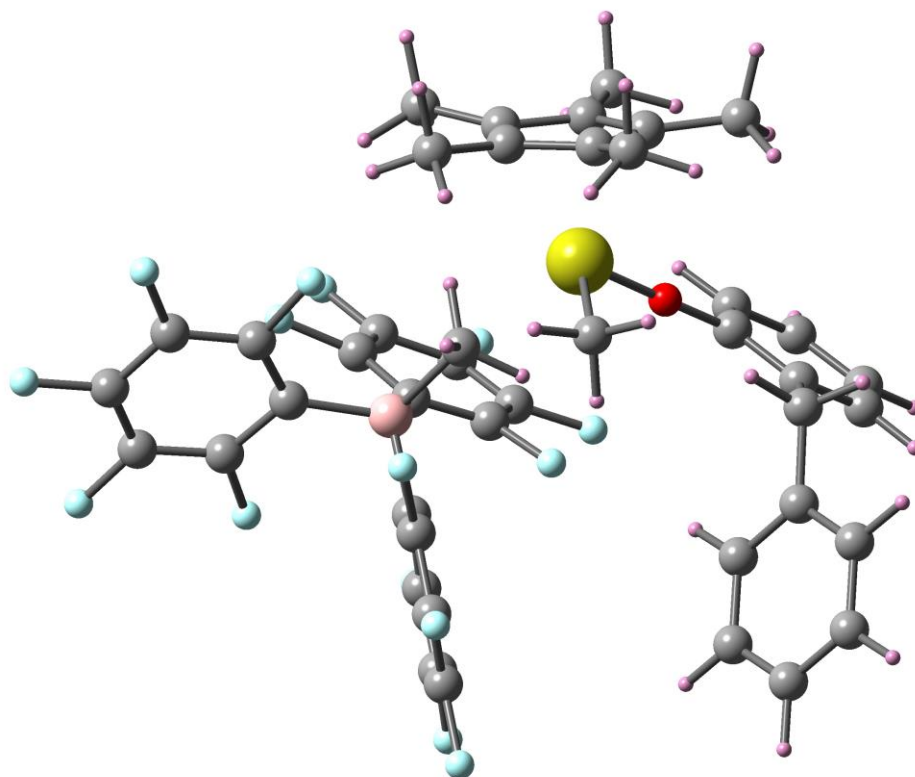

| <b>vacuum</b> | <b>toluene-like solvent</b> | <b>D3 dispersion</b> |
|---------------|-----------------------------|----------------------|
| -3312.6374347 | -3312.6503766               | -0.63983084          |

|    |             |             |             |
|----|-------------|-------------|-------------|
| Ti | 1.67070000  | -2.00460000 | -0.80180000 |
| C  | 2.10900000  | -0.95830000 | -2.54820000 |
| H  | 2.03460000  | 0.10060000  | -2.24350000 |
| H  | 3.10350000  | -1.13740000 | -2.97840000 |
| H  | 1.34670000  | -1.16810000 | -3.31570000 |
| O  | 2.74990000  | -1.22520000 | 0.38140000  |
| C  | 3.60790000  | -0.62400000 | 1.30250000  |
| C  | 4.67470000  | 0.22680000  | 0.89380000  |
| C  | 3.35870000  | -0.88310000 | 2.67570000  |
| C  | 5.47490000  | 0.79090000  | 1.92010000  |
| C  | 4.16570000  | -0.30110000 | 3.66650000  |
| C  | 5.23690000  | 0.53840000  | 3.28450000  |
| H  | 6.29190000  | 1.45540000  | 1.63170000  |
| H  | 3.95430000  | -0.48980000 | 4.72050000  |
| C  | 1.80790000  | -4.19920000 | 0.04790000  |
| C  | 0.57180000  | -4.20840000 | -0.71010000 |
| C  | 2.90030000  | -3.99800000 | -0.88030000 |
| C  | 0.89900000  | -4.01340000 | -2.10340000 |
| C  | 2.33490000  | -3.88860000 | -2.21330000 |
| F  | -0.64040000 | 5.65560000  | -2.17960000 |
| C  | -0.90320000 | 4.41360000  | -1.61800000 |

|   |             |             |             |
|---|-------------|-------------|-------------|
| C | -1.23690000 | 4.29810000  | -0.25900000 |
| C | -0.84630000 | 3.24870000  | -2.39970000 |
| C | -1.49100000 | 3.02700000  | 0.29690000  |
| F | -1.31570000 | 5.44290000  | 0.52640000  |
| C | -1.10540000 | 2.00470000  | -1.79490000 |
| F | -0.53840000 | 3.33410000  | -3.75390000 |
| C | -1.41620000 | 1.81210000  | -0.42730000 |
| F | -1.84520000 | 3.03930000  | 1.64690000  |
| F | -1.06360000 | 0.89960000  | -2.66870000 |
| B | -1.73450000 | 0.27850000  | 0.16490000  |
| C | -1.70930000 | 0.14670000  | 1.82600000  |
| C | -3.20690000 | -0.11940000 | -0.50870000 |
| C | -0.44070000 | -0.75310000 | -0.28440000 |
| C | -2.64230000 | -0.57760000 | 2.60350000  |
| C | -0.62680000 | 0.64520000  | 2.59100000  |
| C | -4.35410000 | 0.66630000  | -0.23260000 |
| C | -3.46670000 | -1.15840000 | -1.42330000 |
| H | 0.42900000  | -0.20450000 | 0.10370000  |
| H | -0.62010000 | -1.70850000 | 0.23340000  |
| H | -0.44770000 | -0.86300000 | -1.37580000 |
| C | -2.55680000 | -0.74360000 | 4.00260000  |
| F | -3.73360000 | -1.22290000 | 2.00390000  |
| C | -0.49150000 | 0.50970000  | 3.98330000  |
| F | 0.42460000  | 1.32160000  | 1.94610000  |
| C | -5.62550000 | 0.45810000  | -0.79620000 |
| F | -4.25960000 | 1.71870000  | 0.68340000  |
| C | -4.71650000 | -1.41280000 | -2.02280000 |
| F | -2.44410000 | -2.05000000 | -1.80820000 |
| C | -1.47590000 | -0.18760000 | 4.70420000  |
| F | -3.52490000 | -1.46750000 | 4.69040000  |
| F | 0.60770000  | 1.04120000  | 4.65200000  |
| C | -5.81210000 | -0.59550000 | -1.70810000 |
| F | -6.69760000 | 1.27520000  | -0.45820000 |
| F | -4.86940000 | -2.46690000 | -2.92060000 |
| F | -1.36570000 | -0.34500000 | 6.07920000  |
| F | -7.05430000 | -0.82390000 | -2.28240000 |
| C | 3.11440000  | -3.88770000 | -3.50600000 |
| H | 4.12630000  | -3.47920000 | -3.38630000 |
| H | 3.22350000  | -4.92480000 | -3.86800000 |
| H | 2.61320000  | -3.31780000 | -4.29870000 |
| C | 4.37350000  | -4.06430000 | -0.54750000 |
| H | 4.72350000  | -5.10970000 | -0.60400000 |
| H | 4.98610000  | -3.47980000 | -1.24760000 |
| H | 4.58980000  | -3.70090000 | 0.46520000  |
| C | -0.06430000 | -4.06260000 | -3.26630000 |
| H | 0.24290000  | -3.40360000 | -4.09010000 |
| H | -0.10200000 | -5.08860000 | -3.67340000 |
| H | -1.08500000 | -3.78780000 | -2.98100000 |
| C | -0.78850000 | -4.56320000 | -0.15230000 |
| H | -1.61020000 | -4.12820000 | -0.73020000 |
| H | -0.91370000 | -5.65990000 | -0.17690000 |
| H | -0.91020000 | -4.25360000 | 0.89510000  |
| C | 1.93410000  | -4.51130000 | 1.52220000  |
| H | 1.92470000  | -5.60500000 | 1.67220000  |
| H | 2.87050000  | -4.13340000 | 1.95040000  |
| H | 1.10300000  | -4.10240000 | 2.11500000  |
| H | 2.52030000  | -1.52220000 | 2.95060000  |

|   |            |             |             |
|---|------------|-------------|-------------|
| H | 5.87130000 | 0.99960000  | 4.04340000  |
| C | 4.99000000 | 0.54320000  | -0.56580000 |
| H | 6.01760000 | 0.20710000  | -0.78300000 |
| H | 4.33130000 | -0.04280000 | -1.21550000 |
| C | 4.87400000 | 2.02440000  | -0.95910000 |
| C | 5.86540000 | 2.61980000  | -1.77810000 |
| C | 3.76110000 | 2.81330000  | -0.57030000 |
| C | 5.74920000 | 3.96140000  | -2.20410000 |
| H | 6.73490000 | 2.03350000  | -2.08770000 |
| C | 3.64170000 | 4.15400000  | -0.99260000 |
| H | 2.98990000 | 2.38900000  | 0.07620000  |
| C | 4.63420000 | 4.73400000  | -1.81390000 |
| H | 6.52620000 | 4.40000000  | -2.83480000 |
| H | 2.77840000 | 4.74570000  | -0.67900000 |
| H | 4.54010000 | 5.77180000  | -2.14090000 |

|                |          |          |          |
|----------------|----------|----------|----------|
| Frequencies -- | -7.3308  | 5.5728   | 9.2807   |
| Frequencies -- | 15.8037  | 22.1215  | 26.4840  |
| Frequencies -- | 26.7825  | 29.0558  | 33.5310  |
| Frequencies -- | 33.9328  | 38.1066  | 41.7259  |
| Frequencies -- | 44.3653  | 47.8740  | 61.5354  |
| Frequencies -- | 62.6858  | 72.1915  | 73.8890  |
| Frequencies -- | 97.4238  | 102.1890 | 107.1549 |
| Frequencies -- | 111.3338 | 112.3797 | 114.7735 |
| Frequencies -- | 118.6618 | 121.3572 | 122.2724 |
| Frequencies -- | 125.3354 | 126.8212 | 136.0167 |
| Frequencies -- | 136.5646 | 137.4250 | 142.9637 |
| Frequencies -- | 147.5597 | 148.7003 | 155.4796 |
| Frequencies -- | 158.6471 | 162.1451 | 168.0272 |
| Frequencies -- | 170.0743 | 174.2988 | 182.0008 |
| Frequencies -- | 195.4236 | 201.2983 | 213.5020 |
| Frequencies -- | 213.8513 | 217.9888 | 222.1925 |
| Frequencies -- | 233.7593 | 235.8834 | 257.0101 |
| Frequencies -- | 263.9608 | 264.8297 | 265.0901 |
| Frequencies -- | 269.0542 | 272.0445 | 273.4815 |
| Frequencies -- | 274.4603 | 284.5187 | 286.4523 |
| Frequencies -- | 289.2958 | 292.3791 | 299.0500 |
| Frequencies -- | 300.4506 | 301.1756 | 301.4780 |
| Frequencies -- | 308.5645 | 318.6171 | 325.5936 |
| Frequencies -- | 330.6799 | 335.0584 | 338.4020 |
| Frequencies -- | 346.1388 | 351.9101 | 367.8682 |
| Frequencies -- | 378.7394 | 379.0770 | 379.7791 |
| Frequencies -- | 380.4550 | 393.6696 | 401.6660 |
| Frequencies -- | 407.3705 | 416.3244 | 430.8570 |
| Frequencies -- | 431.9091 | 433.7388 | 446.9334 |
| Frequencies -- | 453.7860 | 457.3333 | 457.7818 |
| Frequencies -- | 467.4754 | 474.4573 | 478.7880 |
| Frequencies -- | 510.8277 | 527.9000 | 530.7769 |
| Frequencies -- | 535.7376 | 540.2062 | 543.4872 |
| Frequencies -- | 548.7137 | 553.7420 | 567.2008 |
| Frequencies -- | 575.4970 | 582.4083 | 586.7953 |
| Frequencies -- | 600.8537 | 603.1256 | 610.3487 |
| Frequencies -- | 615.1290 | 623.0115 | 632.9920 |
| Frequencies -- | 636.1074 | 636.7510 | 640.7280 |
| Frequencies -- | 648.1502 | 649.6952 | 665.4190 |
| Frequencies -- | 682.2808 | 701.4404 | 709.0972 |
| Frequencies -- | 716.3339 | 726.8655 | 731.0254 |
| Frequencies -- | 741.1299 | 743.5618 | 750.1233 |
| Frequencies -- | 763.9005 | 769.0692 | 770.3859 |
| Frequencies -- | 799.3292 | 804.3182 | 813.2996 |
| Frequencies -- | 820.2470 | 840.2266 | 850.3905 |

|                |           |           |           |
|----------------|-----------|-----------|-----------|
| Frequencies -- | 861.8326  | 876.6624  | 880.1797  |
| Frequencies -- | 900.5932  | 912.2649  | 912.4558  |
| Frequencies -- | 915.0991  | 940.5815  | 956.3660  |
| Frequencies -- | 967.7187  | 967.9143  | 970.0424  |
| Frequencies -- | 988.8685  | 999.5117  | 1002.6400 |
| Frequencies -- | 1008.0623 | 1018.8055 | 1020.4021 |
| Frequencies -- | 1028.2827 | 1041.2762 | 1042.5793 |
| Frequencies -- | 1044.8082 | 1046.5239 | 1047.0501 |
| Frequencies -- | 1048.2935 | 1048.8440 | 1051.9542 |
| Frequencies -- | 1052.8676 | 1054.7808 | 1066.4172 |
| Frequencies -- | 1087.5143 | 1088.2634 | 1089.0769 |
| Frequencies -- | 1091.4310 | 1113.1976 | 1125.8417 |
| Frequencies -- | 1157.0131 | 1170.3385 | 1175.4217 |
| Frequencies -- | 1182.8995 | 1184.2396 | 1193.0433 |
| Frequencies -- | 1196.6395 | 1203.8989 | 1212.2741 |
| Frequencies -- | 1212.9641 | 1214.1729 | 1214.8528 |
| Frequencies -- | 1217.6577 | 1231.4303 | 1298.0816 |
| Frequencies -- | 1313.0038 | 1320.5114 | 1320.9004 |
| Frequencies -- | 1325.2143 | 1338.8883 | 1344.8550 |
| Frequencies -- | 1352.0806 | 1358.9492 | 1375.2778 |
| Frequencies -- | 1379.6292 | 1408.5938 | 1412.4555 |
| Frequencies -- | 1414.7836 | 1419.8024 | 1423.3129 |
| Frequencies -- | 1424.3265 | 1425.8190 | 1428.6144 |
| Frequencies -- | 1430.0213 | 1432.4304 | 1435.1035 |
| Frequencies -- | 1443.2678 | 1445.5896 | 1447.2891 |
| Frequencies -- | 1454.0104 | 1456.5870 | 1458.3587 |
| Frequencies -- | 1460.8308 | 1467.2103 | 1467.7725 |
| Frequencies -- | 1471.2284 | 1479.0456 | 1480.3810 |
| Frequencies -- | 1487.7123 | 1490.5553 | 1493.3705 |
| Frequencies -- | 1494.4862 | 1497.5740 | 1499.6275 |
| Frequencies -- | 1504.2187 | 1505.4844 | 1506.7140 |
| Frequencies -- | 1511.1511 | 1514.1033 | 1517.0330 |
| Frequencies -- | 1586.1185 | 1594.4768 | 1596.6864 |
| Frequencies -- | 1599.0448 | 1604.1749 | 1615.6027 |
| Frequencies -- | 1617.9779 | 1619.7224 | 1623.1509 |
| Frequencies -- | 1626.1585 | 2988.2830 | 2993.8695 |
| Frequencies -- | 3009.6345 | 3011.3417 | 3011.8861 |
| Frequencies -- | 3013.6965 | 3014.4159 | 3036.6343 |
| Frequencies -- | 3095.0879 | 3101.8274 | 3103.3803 |
| Frequencies -- | 3104.8823 | 3106.3652 | 3110.9857 |
| Frequencies -- | 3123.8106 | 3135.6373 | 3139.6380 |
| Frequencies -- | 3142.4285 | 3145.3159 | 3146.5078 |
| Frequencies -- | 3147.6353 | 3151.4547 | 3157.6791 |
| Frequencies -- | 3167.2320 | 3167.5336 | 3168.1251 |
| Frequencies -- | 3173.1115 | 3177.8784 | 3178.5532 |
| Frequencies -- | 3193.8840 | 3194.6076 | 3210.1250 |
